# Supplementary material for: An essential role for MEF2C in the cortical response to loss of sleep in mice
Source: eLife journal article supplement (doi:10.7554/elife.58331), 2020-08-27
Supplement: supp [file elife-58331-supp-v1.zip]

Archive with 20 entries (20 files):
- elife_poa_e58331_Supplementary_file_1.xlsx
- elife_poa_e58331_Supplementary_file_2.xlsx
- elife_poa_e58331_Supplementary_file_3.xlsx
- elife_poa_e58331_Supplementary_file_4.xlsx
- elife_poa_e58331_Supplementary_file_5.xlsx
- elife_poa_e58331_Supplementary_file_6.docx
- elife_poa_e58331_Supplementary_file_7.docx
- elife_poa_e58331_Supplementary_file_8.xlsx
- elife_poa_e58331_Supplementary_file_9.xlsx
- elife_poa_e58331_Supplementary_file_10.xlsx
- elife_poa_e58331_Video_1.mov
- elife_poa_e58331_Transparent_Reporting_File.docx
- elife_poa_e58331_Figure_1_figure_supplement_1.pdf
- elife_poa_e58331_Figure_1_figure_supplement_2.pdf
- elife_poa_e58331_Figure_1_figure_supplement_3.pdf
- elife_poa_e58331_Figure_2_figure_supplement_1.pdf
- elife_poa_e58331_Figure_4_figure_supplement_1.pdf
- elife_poa_e58331_Figure_6_figure_supplement_1.pdf
- elife_poa_e58331_Figure_7_figure_supplement_1.pdf
- elife_poa_e58331_Figure_7_figure_supplement_2.pdf
