# Supplementary material for: An essential role for MEF2C in the cortical response to loss of sleep in mice
Source: eLife journal article supplement (doi:10.7554/elife.58331), 2020-08-27
Supplement: supp [file elife-58331-supp-v1.zip › elife_poa_e58331_Supplementary_file_1.xlsx]

## Sheet: DEG_WT_CS|SD
Gene	baseMean	log2FoldChange	lfcSE	stat	pvalue	padj
0610009O20Rik	2799.81	0.169949	0.0729391	2.33002	0.0198053	0.0370427
1810055G02Rik	1471.43	-0.250508	0.162333	-1.54318	0.122788	0.171105
2410015M20Rik	2217.24	0.58179	0.248998	2.33653	0.0194638	0.03652
2510009E07Rik	5942.09	-0.386404	0.158431	-2.43894	0.0147305	0.0289909
2700062C07Rik	974.69	-0.236678	0.138897	-1.70398	0.0883856	0.129475
2810403A07Rik	6312.91	-0.173917	0.06281	-2.76893	0.00562407	0.0133286
2900055J20Rik	1212.54	-0.490641	0.125008	-3.92487	8.67765e-05	0.00049938
3110082I17Rik	1387.89	0.208957	0.244413	0.854933	0.392588	0.46376
8030462N17Rik	16298.9	-0.568351	0.130101	-4.36855	1.25076e-05	0.00010874
9130011E15Rik	4042.38	-0.276714	0.134674	-2.05469	0.0399094	0.0662548
9930104L06Rik	1310.33	0.330487	0.0935744	3.53181	0.000412721	0.00170569
9930111J21Rik2	365.718	-1.09132	0.408786	-2.66966	0.00759281	0.0169377
A2m	168.088	1.68172	0.282868	5.94523	2.76061e-09	1.2094e-07
A4galt	331.959	0.623744	0.133162	4.68412	2.81168e-06	3.25492e-05
Aaas	773.956	0.0495764	0.101439	0.488733	0.625031	0.685692
Aacs	2679.67	0.476394	0.209183	2.2774	0.0227621	0.0415764
Aaed1	1255.18	-0.319824	0.118219	-2.70536	0.00682308	0.0155532
Aagab	5646.59	0.214305	0.113477	1.88854	0.0589531	0.0917662
Aak1	39770.2	-0.198207	0.0701323	-2.82619	0.00471058	0.0115767
Aamdc	1570.59	-0.174831	0.0899816	-1.94297	0.0520201	0.0827339
Aamp	8133.31	0.279107	0.126785	2.20141	0.0277068	0.0489264
Aar2	2438.07	0.452734	0.157494	2.8746	0.00404535	0.0102792
Aard	141.106	-0.231739	0.125747	-1.8429	0.0653434	0.100494
Aars	12436.7	0.0172686	0.0907897	0.190204	0.849149	0.879699
Aars2	1916.48	0.565068	0.217442	2.59871	0.00935759	0.0200526
Aasdh	1077.93	0.0395105	0.0814577	0.485043	0.627646	0.687803
Aasdhppt	3478.59	-0.419587	0.146871	-2.85684	0.00427878	0.0107459
Aass	409.918	-0.0402312	0.157388	-0.255618	0.798246	0.837828
Aatf	3808.86	-0.355008	0.089707	-3.95742	7.57649e-05	0.000452285
Aatk	14381.5	0.671485	0.366172	1.8338	0.0666843	0.102277
Abat	18666.9	0.223289	0.10122	2.20598	0.0273856	0.0484702
Abca1	6173.79	0.0122585	0.119797	0.102327	0.918497	0.936351
Abca17	215.382	-0.603734	0.181095	-3.3338	0.000856668	0.00302131
Abca2	17188.9	0.36087	0.136245	2.64868	0.00808056	0.0178338
Abca3	8622.77	0.101179	0.0978275	1.03426	0.301013	0.370025
Abca4	513.908	-0.0871172	0.193257	-0.450784	0.652145	0.710205
Abca5	8943.65	-0.402335	0.101615	-3.95941	7.5134e-05	0.000448933
Abca6	379.508	-0.375255	0.14851	-2.5268	0.0115108	0.0236759
Abca7	1754.65	0.352021	0.236257	1.48999	0.136226	0.186956
Abca8a	822.693	-0.144045	0.140874	-1.02251	0.30654	0.375785
Abca8b	5478.7	-0.633592	0.13264	-4.77679	1.78112e-06	2.25319e-05
Abca9	1286.2	0.197001	0.14532	1.35564	0.175215	0.231889
Abcb10	1738.38	0.388389	0.134383	2.89016	0.00385041	0.00988666
Abcb1a	3498	-0.180753	0.135984	-1.32923	0.183773	0.241636
Abcb1b	757.359	-0.335095	0.0884854	-3.78701	0.00015247	0.000774851
Abcb4	1010.39	-0.507857	0.123701	-4.10551	4.03417e-05	0.00027519
Abcb7	6596.92	-0.387482	0.112841	-3.43387	0.000595022	0.00225509
Abcb8	2408.68	0.517958	0.299217	1.73105	0.0834434	0.123318
Abcb9	3947.04	0.471426	0.22661	2.08034	0.0374942	0.0629071
Abcc1	3022.71	0.00880371	0.123112	0.0715098	0.942992	0.954713
Abcc10	664.345	0.561315	0.17829	3.14833	0.00164207	0.00504659
Abcc3	184.007	0.572007	0.167773	3.40941	0.000651041	0.00241927
Abcc4	2948.17	0.0229899	0.150195	0.153067	0.878346	0.903525
Abcc5	15574.3	0.0570149	0.0993907	0.573645	0.566208	0.631808
Abcc6	157.752	0.416686	0.179215	2.32507	0.0200682	0.0374425
Abcc8	2516.79	-0.0891208	0.180761	-0.49303	0.621992	0.683341
Abcc9	966.541	-0.151371	0.092448	-1.63737	0.101554	0.145781
Abcd1	838.161	0.218731	0.114047	1.91791	0.0551226	0.0867312
Abcd2	6808.85	-0.520016	0.119	-4.36988	1.24312e-05	0.000108149
Abcd3	7082.3	-0.138001	0.0858593	-1.60729	0.10799	0.153641
Abcd4	689.865	0.404529	0.119458	3.38637	0.000708244	0.00258877
Abce1	11754.8	-0.543048	0.172322	-3.15135	0.00162517	0.00500415
Abcf1	5993.74	0.113162	0.142174	0.795941	0.426067	0.497859
Abcf2	6152.45	0.220812	0.0990119	2.23016	0.025737	0.0460303
Abcf3	4164.29	0.288025	0.0799781	3.6013	0.000316636	0.00137641
Abcg1	6939.27	0.275046	0.103637	2.65392	0.00795621	0.0176089
Abcg2	2452.16	-0.20014	0.082486	-2.42635	0.0152514	0.0298291
Abcg4	2569.42	0.255003	0.1548	1.64731	0.0994946	0.143303
Abhd10	2083.6	0.00901671	0.0846245	0.10655	0.915146	0.933523
Abhd11	946.009	0.427971	0.16388	2.61149	0.00901486	0.0194857
Abhd12	18275.7	0.119103	0.10082	1.18134	0.237468	0.301643
Abhd13	4143.36	-0.0654658	0.0785422	-0.833511	0.404557	0.476031
Abhd14a	1916.41	0.420862	0.233167	1.80498	0.071078	0.107828
Abhd14b	747.588	0.143022	0.159819	0.894896	0.370843	0.442063
Abhd16a	3838.37	0.481848	0.191536	2.51571	0.0118793	0.0243264
Abhd17a	3867.68	1.42827	0.484212	2.94969	0.00318093	0.00852517
Abhd17b	3924.54	-0.518022	0.121962	-4.24741	2.1626e-05	0.000167951
Abhd17c	2013.03	0.0887982	0.0791841	1.12142	0.262111	0.328406
Abhd2	17384.7	-0.229001	0.0945221	-2.42272	0.0154047	0.0300608
Abhd3	4444.1	-0.396545	0.116397	-3.40684	0.000657201	0.00244076
Abhd4	2638.56	0.251523	0.109038	2.30674	0.0210691	0.039029
Abhd5	1799.45	-0.253323	0.093976	-2.69562	0.00702584	0.0159197
Abhd6	3227.76	0.013258	0.102524	0.129316	0.897107	0.918521
Abhd8	9613.38	1.11036	0.454627	2.44236	0.0145916	0.0287658
Abi1	14780	-0.304219	0.0799744	-3.80396	0.000142403	0.00073406
Abi2	33454.6	-0.309253	0.0936525	-3.30214	0.000959517	0.00330574
Abi3	269.467	0.582846	0.149729	3.89267	9.91485e-05	0.000553938
Abi3bp	5546.11	-1.29351	0.376112	-3.43917	0.000583499	0.00222463
Abl1	5592.78	0.156044	0.150173	1.0391	0.29876	0.367743
Abl2	10024.5	0.0817853	0.116021	0.704915	0.480863	0.552029
Ablim1	18431.2	-0.357726	0.126653	-2.82446	0.00473604	0.0116304
Ablim2	19110	0.144492	0.119802	1.20609	0.227784	0.290826
Ablim3	3623.6	-0.205154	0.196472	-1.04419	0.296399	0.365289
Abr	35216.9	0.163504	0.0984434	1.66089	0.0967346	0.140136
Abracl	710.719	0.163139	0.104535	1.56062	0.118613	0.166218
Abt1	957.103	0.533401	0.16229	3.28671	0.00101364	0.00343607
Abtb1	1718.27	0.572807	0.248317	2.30675	0.0210685	0.039029
Abtb2	1801.28	-0.0140619	0.140821	-0.0998565	0.920458	0.93776
AC074312.5	1348.28	-0.14275	0.0766128	-1.86326	0.0624254	0.0964756
AC090443.3	1230.45	-0.544965	0.124109	-4.39102	1.12821e-05	9.99648e-05
AC092855.1	172.525	-0.0359985	0.135167	-0.266326	0.789988	0.830979
AC099860.1	5635.64	-0.39385	0.0960908	-4.09872	4.15432e-05	0.000281607
AC102077.1	543.203	0.0421336	0.104267	0.404091	0.686146	0.740509
AC102096.1	2009.59	0.197916	0.0450505	4.3932	1.11696e-05	9.90353e-05
AC102506.1	575.094	-0.0183257	0.097237	-0.188464	0.850513	0.880981
AC102628.1	2505.77	-0.689229	0.151386	-4.5528	5.29356e-06	5.44661e-05
AC103620.3	36005.8	-0.146386	0.107261	-1.36476	0.172329	0.22877
AC103635.1	33123.2	-0.746185	0.11906	-6.26728	3.67416e-10	2.40328e-08
AC104325.1	4157.14	0.587239	0.201074	2.9205	0.00349466	0.00918439
AC107707.3	353.291	0.367563	0.117494	3.12836	0.00175785	0.00532661
AC109152.2	1209.41	-0.196504	0.124841	-1.57404	0.115479	0.162494
AC110508.1	389.275	-0.098682	0.130396	-0.756785	0.449179	0.520779
AC113182.4	710.444	0.21327	0.0872549	2.44422	0.0145164	0.0286568
AC114005.5	6094.05	0.327927	0.0851196	3.85255	0.000116896	0.000628588
AC114558.6	393.607	-0.501621	0.205186	-2.44472	0.0144966	0.0286221
AC114920.2	2942.29	-0.330492	0.126838	-2.60562	0.00917088	0.0197473
AC116475.2	507.742	0.30538	0.166188	1.83756	0.0661267	0.101554
AC116718.1	645.478	-0.7112	0.197126	-3.60784	0.000308756	0.00134986
AC117750.1	663.266	-0.564179	0.142143	-3.96909	7.21488e-05	0.00043591
AC121113.1	5266.35	-0.454863	0.153919	-2.9552	0.00312466	0.00841689
AC121838.2	15289.1	0.292815	0.0740186	3.95597	7.62251e-05	0.000454404
AC122423.2	147.697	-0.153499	0.149955	-1.02363	0.30601	0.375277
AC123679.2	4363.27	-0.462543	0.0991384	-4.66562	3.07683e-06	3.51912e-05
AC123684.1	1252.69	0.375387	0.14299	2.62527	0.00865797	0.0188623
AC123686.4	1058.06	0.520118	0.164348	3.16474	0.00155223	0.00482416
AC124566.2	1245.52	0.158827	0.109953	1.44449	0.1486	0.201938
AC124713.2	3028.76	0.0576381	0.0918559	0.627484	0.530342	0.599464
AC125061.1	1745.15	0.637813	0.102341	6.23225	4.59775e-10	2.84081e-08
AC126938.1	30367.3	0.109899	0.112024	0.981026	0.32658	0.396859
AC127333.1	3837.79	0.0376974	0.103663	0.363653	0.716117	0.76704
AC127339.2	915.194	-0.0060581	0.136744	-0.0443026	0.964663	0.971563
AC129188.1	2110.4	0.739735	0.194874	3.79596	0.000147074	0.000752416
AC129337.1	2005.95	-0.86521	0.106771	-8.10342	5.34366e-16	3.46109e-13
AC130827.2	18599.4	-0.306631	0.160668	-1.90847	0.0563302	0.0883415
AC131791.1	315.24	-0.372656	0.127631	-2.91979	0.00350269	0.00920175
AC131992.1	3571.88	-0.0132199	0.137357	-0.0962448	0.923326	0.939833
AC132242.1	1189.83	-0.149048	0.141347	-1.05448	0.291663	0.360379
AC132303.1	305.911	0.0875247	0.147479	0.593474	0.552864	0.619962
AC136513.6	124.905	-0.200274	0.176058	-1.13754	0.255311	0.321128
AC139063.2	1400.56	-0.390376	0.107778	-3.62203	0.000292298	0.00129761
AC139867.2	332.451	0.157678	0.110111	1.43199	0.152147	0.205919
AC140321.1	22704.5	0.06353	0.17029	0.37307	0.709096	0.760967
AC141209.3	211.678	0.237742	0.230301	1.03231	0.301926	0.370971
AC152164.2	158.296	-0.483929	0.222848	-2.17156	0.0298889	0.0519986
AC153919.1	360.801	0.114622	0.146421	0.782826	0.433729	0.505536
AC155158.1	2459.24	0.00210562	0.112695	0.0186842	0.985093	0.987749
AC157555.1	9727.25	-0.485704	0.0969749	-5.00855	5.48417e-07	8.713e-06
AC157561.9	690.646	0.126096	0.14094	0.894678	0.370959	0.442161
AC157667.1	7329.62	-0.172476	0.107216	-1.60868	0.107686	0.153309
AC157774.6	1265.35	1.49955	0.491771	3.04929	0.00229383	0.00658269
AC158971.1	12273.8	-0.386823	0.0955373	-4.04892	5.1454e-05	0.000332768
AC159257.5	1945.38	0.5423	0.138779	3.90766	9.31926e-05	0.000527861
AC159266.3	317.807	-0.112445	0.11377	-0.98836	0.322976	0.393365
AC160535.1	6725.7	-0.151324	0.107299	-1.4103	0.15845	0.213187
AC161108.3	236.125	0.534744	0.151337	3.53346	0.000410162	0.00169698
AC161207.1	2814.17	0.00418248	0.0914249	0.0457477	0.963511	0.970683
AC161792.1	1374.76	-0.105394	0.165635	-0.6363	0.524581	0.594058
AC162528.2	4429.08	0.349667	0.147329	2.37337	0.0176268	0.0335867
AC162689.1	474.042	-0.65771	0.180654	-3.64072	0.000271873	0.00122712
AC163329.3	773.232	1.83992	0.724026	2.54123	0.0110463	0.022906
AC163616.2	3513.66	0.309774	0.127305	2.43332	0.0149609	0.029342
AC163993.2	545.732	-0.536059	0.1272	-4.21431	2.5054e-05	0.000189131
AC164703.3	2147.41	0.122124	0.0868201	1.40664	0.159535	0.214446
AC165086.3	5411.25	0.102447	0.0760738	1.34668	0.178084	0.235038
AC166328.1	3627	-0.0736303	0.146994	-0.500907	0.616437	0.678505
AC166332.1	9537.32	-0.23658	0.0911352	-2.59592	0.00943376	0.0201891
AC167815.1	11402.9	-0.285124	0.107663	-2.6483	0.00808973	0.0178464
AC168051.1	1968.36	-0.196648	0.0873615	-2.25096	0.0243879	0.0439511
Acaa1a	2742.31	0.711163	0.232736	3.05567	0.00224562	0.00648022
Acaa2	1025.52	0.250705	0.0990567	2.53092	0.0113764	0.0234628
Acaca	14668.6	-0.275608	0.0723269	-3.81058	0.000138641	0.00071954
Acacb	336.218	0.733581	0.149588	4.90399	9.39075e-07	1.34269e-05
Acad10	607.892	0.125839	0.127586	0.986302	0.323985	0.394334
Acad11	2349.6	-0.254814	0.0629336	-4.04893	5.14526e-05	0.000332768
Acad12	253.534	0.421565	0.116433	3.62068	0.00029383	0.00130263
Acad8	2099.32	-0.0667776	0.0526273	-1.26888	0.204484	0.264942
Acad9	2328.22	0.297064	0.110754	2.68219	0.00731427	0.0164466
Acadl	1370.67	-0.267318	0.215914	-1.23808	0.215688	0.277409
Acadm	2517.05	-0.0452112	0.0662382	-0.682554	0.494888	0.565624
Acads	259.195	0.996196	0.262478	3.79535	0.000147433	0.000753394
Acadsb	6789.27	-0.560063	0.121222	-4.62015	3.83455e-06	4.20243e-05
Acadvl	2215.09	0.568277	0.169493	3.3528	0.000799975	0.00286188
Acan	424.215	0.349203	0.151957	2.29803	0.02156	0.0398245
Acap2	25698	-0.245353	0.0976882	-2.51159	0.0120188	0.0245687
Acap3	7172.92	0.538672	0.171364	3.14343	0.00166981	0.00510909
Acat1	7718.96	0.0235137	0.0532684	0.44142	0.658909	0.716487
Acat2	2907.34	-0.092641	0.0926973	-0.999393	0.317604	0.38788
Acat3	548.996	-0.012157	0.132166	-0.0919831	0.926711	0.942281
Acbd3	3177.61	-0.23255	0.117857	-1.97316	0.0484777	0.0780003
Acbd4	1754.24	0.54788	0.210056	2.60825	0.00910059	0.019622
Acbd5	9388.72	-0.551368	0.151675	-3.63519	0.000277774	0.00124969
Acbd6	8381.27	-0.373026	0.0805419	-4.63146	3.63097e-06	4.03739e-05
Accs	268.349	-0.0177161	0.122008	-0.145204	0.88455	0.908464
Acd	1387.83	0.0755237	0.129636	0.582585	0.560173	0.626477
Ace	969.358	0.177933	0.171963	1.03472	0.3008	0.369903
Ace2	136.101	-0.48501	0.192316	-2.52194	0.0116708	0.0239594
Acer2	586.635	0.0998442	0.156815	0.6367	0.52432	0.593814
Acer3	6560.29	-0.747226	0.129645	-5.76361	8.23317e-09	2.87473e-07
Ache	2255.34	0.398088	0.19114	2.0827	0.0372784	0.0626173
Acin1	9888.01	0.12804	0.083449	1.53435	0.124943	0.173567
Ackr1	1110.95	0.0844244	0.165379	0.510492	0.609707	0.672641
Ackr2	254.467	0.222047	0.167746	1.32371	0.1856	0.243814
Ackr3	665.159	0.477301	0.154934	3.08067	0.00206534	0.00604619
Acly	13751.7	0.201039	0.0904203	2.22338	0.0261902	0.0467182
Aco1	3300.78	-0.10774	0.0605429	-1.77956	0.075148	0.112774
Aco2	30056.5	0.0903665	0.0827868	1.09156	0.275028	0.342568
Acot1	377.877	0.635554	0.156925	4.05005	5.12062e-05	0.000331662
Acot11	2726.39	0.360604	0.103818	3.47342	0.00051388	0.00201843
Acot13	2816.23	0.015007	0.160468	0.0935202	0.92549	0.941332
Acot2	397.437	0.633083	0.141576	4.47169	7.7604e-06	7.45205e-05
Acot3	188.751	0.00681221	0.187864	0.0362614	0.971074	0.976805
Acot5	144.485	0.76925	0.202493	3.7989	0.000145338	0.00074622
Acot6	493.091	-0.143304	0.14012	-1.02272	0.306439	0.375696
Acot7	11833.6	0.331645	0.108668	3.0519	0.002274	0.00654609
Acot8	867.269	0.631112	0.186604	3.38209	0.000719353	0.00262271
Acot9	1956.77	-0.257043	0.0986882	-2.60459	0.00919829	0.0197899
Acox1	14571.9	0.0600471	0.0572273	1.04927	0.294052	0.363053
Acox3	2286.98	0.159185	0.115339	1.38015	0.16754	0.223283
Acp1	4239.49	-0.123499	0.0684568	-1.80404	0.0712243	0.108006
Acp2	5241.22	-0.0155717	0.0786911	-0.197883	0.843136	0.874459
Acp6	1265.57	0.0464574	0.0792051	0.586546	0.557509	0.623982
Acrbp	401.477	0.436678	0.135088	3.23255	0.00122691	0.00401956
Acsbg1	8116.26	0.437328	0.136365	3.20705	0.00134105	0.00431495
Acsf2	485.813	0.224401	0.221865	1.01143	0.311811	0.381548
Acsl1	5792.17	-0.255023	0.0706552	-3.6094	0.000306909	0.00134314
Acsl3	20969.5	-0.477559	0.192686	-2.47843	0.0131963	0.0265031
Acsl4	13850.1	-0.643423	0.152039	-4.23197	2.31657e-05	0.000177253
Acsl5	6280.41	-0.175894	0.0849016	-2.07174	0.0382893	0.0639752
Acsl6	21068.8	-0.111452	0.0700956	-1.59001	0.111834	0.15831
Acss1	2322.76	0.0532962	0.064516	0.826093	0.408751	0.480399
Acss2	4424.9	-0.161692	0.0632808	-2.55515	0.0106141	0.0221864
Acss3	262.416	-0.0475105	0.264486	-0.179633	0.857441	0.88589
Acta1	436.811	0.511444	0.290392	1.76122	0.0782017	0.116668
Acta2	929.711	0.81926	0.214475	3.81984	0.000133536	0.00069856
Actb	111587	0.274493	0.106193	2.58485	0.00974219	0.0207187
Actg1	25258.4	0.333536	0.109404	3.04866	0.00229862	0.006591
Actl6a	1338.3	0.0569473	0.0786693	0.723882	0.469138	0.540918
Actl6b	3719.98	0.265186	0.111921	2.36942	0.0178162	0.0338663
Actn1	6751.49	0.156972	0.0787371	1.99362	0.0461933	0.0749954
Actn2	2540.36	0.126657	0.197956	0.639824	0.522287	0.591874
Actn4	7023.22	-0.0389067	0.128033	-0.303881	0.761218	0.805812
Actr10	8662.78	0.0161937	0.111364	0.145413	0.884385	0.908439
Actr1a	12146.6	0.338354	0.142934	2.3672	0.0179233	0.0340138
Actr1b	17078.1	0.274225	0.153507	1.7864	0.0740343	0.111451
Actr2	20600.9	-0.0209166	0.0930201	-0.224861	0.822088	0.85771
Actr3	19196.8	-0.130455	0.0882984	-1.47743	0.139561	0.191026
Actr3b	9797.86	-0.288617	0.10414	-2.77142	0.00558116	0.0132536
Actr5	760.714	0.505057	0.189297	2.66807	0.00762889	0.0169948
Actr6	1746.76	-0.0770979	0.0865956	-0.890322	0.373293	0.444721
Actr8	4502.9	0.239278	0.0889857	2.68895	0.00716765	0.0161872
Acvr1	4693.78	-0.371086	0.126762	-2.92742	0.00341792	0.00902849
Acvr1b	8868.05	0.166358	0.100703	1.65196	0.0985431	0.142295
Acvr1c	6352.36	-0.366718	0.145405	-2.52205	0.0116672	0.0239557
Acvr2a	11468.8	-0.489639	0.117157	-4.17935	2.92341e-05	0.000213472
Acvr2b	658.278	0.415084	0.176509	2.35163	0.0186914	0.0352546
Acvrl1	897.609	0.647006	0.246495	2.62483	0.00866928	0.0188838
Acy1	574.075	0.676363	0.20606	3.28236	0.00102942	0.00348083
Acyp1	1379.34	-0.064677	0.116674	-0.554339	0.579347	0.644305
Acyp2	9053.78	-0.741265	0.11844	-6.25858	3.88509e-10	2.49146e-08
Adal	1716.14	-0.0625476	0.0901415	-0.693882	0.487756	0.558458
Adam10	10530.7	-0.579393	0.139034	-4.16728	3.08259e-05	0.000222338
Adam11	4671.55	0.441383	0.221763	1.99034	0.0465534	0.0754683
Adam12	1699.21	0.217002	0.199454	1.08798	0.276603	0.344166
Adam15	3260.4	0.525124	0.227978	2.3034	0.0212563	0.0393139
Adam17	2062.78	-0.0852297	0.0832848	-1.02335	0.306141	0.37538
Adam18	448.856	-1.05839	0.246673	-4.29065	1.78151e-05	0.000144463
Adam19	2192.33	-0.0417112	0.0776422	-0.537224	0.591113	0.655088
Adam21	188.3	-0.529113	0.170851	-3.09693	0.00195539	0.00580432
Adam22	51591.8	-0.511199	0.0866315	-5.90085	3.61642e-09	1.5112e-07
Adam23	28237.1	-0.667078	0.110098	-6.05893	1.37029e-09	6.82722e-08
Adam32	293.979	-0.388344	0.162933	-2.38346	0.0171506	0.0328801
Adam33	377.296	-0.574807	0.164194	-3.50078	0.000463902	0.00186396
Adam8	193.912	0.635018	0.204393	3.10685	0.0018909	0.00564654
Adam9	5632.32	-0.173935	0.0915665	-1.89955	0.0574918	0.0898586
Adamts1	793.85	-0.055118	0.0871273	-0.632614	0.526986	0.596415
Adamts10	1604.95	0.361729	0.144735	2.49925	0.0124457	0.0252739
Adamts12	163.792	-0.0979517	0.21821	-0.448887	0.653513	0.711575
Adamts15	449.904	0.121326	0.149288	0.812698	0.416391	0.488138
Adamts16	829.427	-0.517737	0.168049	-3.08086	0.00206401	0.00604482
Adamts17	3588.8	-0.379003	0.17203	-2.20312	0.0275859	0.0487581
Adamts18	700.677	-0.599349	0.171342	-3.49796	0.000468834	0.00188144
Adamts2	1042.61	0.705718	0.142487	4.95287	7.31272e-07	1.09781e-05
Adamts20	2509.73	-0.492378	0.108093	-4.55514	5.23507e-06	5.39741e-05
Adamts3	6872.49	-0.342604	0.169401	-2.02245	0.0431298	0.070713
Adamts4	1047.86	0.294909	0.146193	2.01726	0.0436689	0.0714973
Adamts5	269.785	0.0023418	0.145217	0.0161262	0.987134	0.989135
Adamts6	2632.91	-0.626231	0.15629	-4.00684	6.15353e-05	0.000384476
Adamts8	214.466	-0.0706854	0.150354	-0.470127	0.638264	0.697344
Adamts9	736.402	0.10751	0.17444	0.616313	0.537688	0.605987
Adamtsl1	2836.52	-0.575933	0.147605	-3.90185	9.5459e-05	0.000538579
Adamtsl2	498.228	0.180743	0.239325	0.755217	0.450119	0.521589
Adamtsl3	522.28	0.387005	0.259054	1.49392	0.135197	0.18572
Adamtsl4	377.796	0.406058	0.209097	1.94196	0.0521424	0.0828776
Adamtsl5	312.401	0.394018	0.161712	2.43655	0.0148282	0.0291449
Adap1	11274.9	0.237707	0.151622	1.56776	0.116937	0.164152
Adap2	941.34	0.168519	0.112196	1.502	0.133097	0.183243
Adar	15197.3	0.178342	0.110196	1.61841	0.105575	0.150635
Adarb1	21173.3	-0.0227698	0.0834227	-0.272945	0.784896	0.826696
Adarb2	31350.5	-0.620943	0.205706	-3.01859	0.00253951	0.00713288
Adat1	661.561	0.0307799	0.0995421	0.309215	0.757158	0.802506
Adat2	312.678	0.440356	0.124182	3.54605	0.000391055	0.00163727
Adck1	3779.92	0.158779	0.175979	0.902265	0.366916	0.437946
Adck2	1011.7	0.264647	0.145407	1.82004	0.0687526	0.104828
Adck3	1669.15	0.495665	0.14038	3.53087	0.000414194	0.00171018
Adck4	1290.01	0.232615	0.102245	2.27507	0.0229015	0.0417722
Adck5	715.043	0.52913	0.187635	2.82	0.00480231	0.0117398
Adcy1	61069	0.1327	0.115974	1.14422	0.252531	0.318126
Adcy10	126.723	-0.774622	0.176167	-4.39708	1.09716e-05	9.77482e-05
Adcy2	40716.6	-0.633387	0.104528	-6.05947	1.36572e-09	6.82722e-08
Adcy3	4096.35	0.499297	0.142323	3.50819	0.000451159	0.00182293
Adcy4	190.695	0.497484	0.144983	3.43132	0.000600647	0.00226911
Adcy5	23840.2	0.622835	0.232238	2.68189	0.00732083	0.0164557
Adcy6	3391.08	0.24445	0.0811671	3.01169	0.00259796	0.00725459
Adcy7	519.947	0.186535	0.122834	1.5186	0.128864	0.178287
Adcy8	8092.97	-0.838338	0.136066	-6.16125	7.21707e-10	4.01231e-08
Adcy9	16908.4	-0.0154646	0.15608	-0.0990813	0.921074	0.938239
Adcyap1	1175.09	-0.171735	0.110208	-1.55828	0.119167	0.166871
Adcyap1r1	9742.4	0.583884	0.167226	3.49159	0.000480159	0.00192083
Add1	29302.8	0.0792118	0.0552547	1.43358	0.151693	0.205462
Add2	31348.6	0.214923	0.0785623	2.7357	0.00622485	0.0144398
Add3	14778.8	-0.263579	0.0735894	-3.58175	0.000341296	0.00146396
Adgra1	5186.49	0.206306	0.133362	1.54697	0.12187	0.169955
Adgra2	864.708	0.870254	0.165815	5.24833	1.53481e-07	3.15587e-06
Adgra3	2192.47	-0.187243	0.067235	-2.7849	0.00535445	0.0128014
Adgrb1	23145	0.600972	0.207818	2.89183	0.0038301	0.00984623
Adgrb2	21545.1	0.730717	0.301091	2.4269	0.0152286	0.0297947
Adgrb3	172394	-0.809786	0.139285	-5.81387	6.10465e-09	2.27889e-07
Adgrd1	559.423	0.0360285	0.123928	0.290722	0.771264	0.814856
Adgre1	473.537	-0.0863666	0.0942493	-0.916363	0.359476	0.430415
Adgre5	809.422	0.157188	0.116083	1.3541	0.175705	0.232467
Adgrf2	244.704	-0.676799	0.181731	-3.72419	0.000195946	0.000946475
Adgrf4	265.984	-0.416163	0.143831	-2.89341	0.00381089	0.00980658
Adgrf5	3823.49	-0.331194	0.14452	-2.29168	0.0219244	0.040334
Adgrg1	2353.37	0.571976	0.170685	3.35106	0.000805041	0.00287604
Adgrg6	1088.18	-1.14467	0.15426	-7.42042	1.16751e-13	2.92455e-11
Adgrl1	40361.9	0.307575	0.175933	1.74825	0.080421	0.119468
Adgrl2	14438	-0.44299	0.0939858	-4.71338	2.43644e-06	2.89556e-05
Adgrl3	102382	-0.666677	0.13606	-4.89989	9.58901e-07	1.36351e-05
Adgrl4	3348.14	-0.671497	0.186218	-3.60598	0.000310978	0.00135728
Adgrv1	521.401	-0.068667	0.190762	-0.359962	0.718876	0.769534
Adh5	2629.51	0.187905	0.111064	1.69187	0.0906705	0.132343
Adhfe1	1345.18	0.0281775	0.110793	0.254326	0.799244	0.838604
Adi1	988.223	0.151909	0.140758	1.07923	0.280487	0.348229
Adipor1	4355.5	0.30221	0.0819943	3.68575	0.000228034	0.00106988
Adipor2	5133.89	0.32047	0.0544524	5.88532	3.97278e-09	1.62859e-07
Adk	13774.6	-0.53668	0.0954542	-5.62238	1.88344e-08	5.72726e-07
Adnp2	2639.68	0.174368	0.0923073	1.889	0.0588919	0.0916929
Ado	4193.81	0.238496	0.103528	2.30369	0.0212401	0.0392895
Adora1	13073	-0.0720581	0.110499	-0.652118	0.514325	0.583975
Adora2a	2164.59	0.85623	0.378168	2.26415	0.0235647	0.0427291
Adpgk	1465.86	0.0354892	0.0826209	0.429543	0.667528	0.723915
Adprh	2860.05	0.724826	0.190148	3.81192	0.000137894	0.00071669
Adprhl2	1192.68	0.624695	0.222803	2.8038	0.00505049	0.0122174
Adprm	1236	-0.178088	0.0803327	-2.21688	0.0266312	0.0473407
Adra1a	4675.98	-0.31118	0.122467	-2.54094	0.0110555	0.0229213
Adra1b	1256.07	0.10701	0.13118	0.815749	0.414644	0.48631
Adra1d	753.274	0.902451	0.248523	3.63125	0.000282049	0.00126032
Adra2a	680.565	0.717125	0.125206	5.72757	1.01879e-08	3.45481e-07
Adra2c	1342.82	1.01104	0.176139	5.73999	9.46826e-09	3.27946e-07
Adrb1	869.773	0.145949	0.125345	1.16438	0.244271	0.309284
Adrb2	111.87	0.586118	0.170717	3.43327	0.000596357	0.00225817
Adrbk1	11042.7	0.429403	0.139921	3.0689	0.0021485	0.00624447
Adrbk2	10847.8	-0.0641463	0.0819595	-0.782658	0.433828	0.505605
Adrm1	2179.32	0.642864	0.164544	3.90695	9.34677e-05	0.000529005
Adsl	1675.9	0.380749	0.111422	3.41718	0.000632744	0.0023628
Adss	8600.55	-0.325959	0.105658	-3.08505	0.00203518	0.00598495
Adssl1	911.536	0.429886	0.107465	4.00023	6.32819e-05	0.000393167
Aebp1	863.24	1.46458	0.43928	3.33405	0.000855924	0.00301951
Aebp2	6503.97	-0.210197	0.0916748	-2.29285	0.0218567	0.0402518
Aen	1212.65	0.212777	0.103917	2.04758	0.0406016	0.0672058
Aes	11196.3	0.624989	0.160731	3.88841	0.000100905	0.000560516
Afap1	2515.93	0.0519419	0.102972	0.504426	0.613962	0.676413
Afap1l1	2526.54	-0.115548	0.0832904	-1.38729	0.165353	0.220823
Afap1l2	1107.2	-0.0106851	0.126902	-0.0841992	0.932898	0.94723
Aff1	2211.85	0.155467	0.145549	1.06814	0.285457	0.353688
Aff2	10623.4	-0.852463	0.153324	-5.55986	2.69987e-08	7.65299e-07
Aff3	19256.5	-0.323336	0.140031	-2.30903	0.020942	0.038838
Aff4	26404.6	-0.25348	0.103964	-2.43815	0.0147626	0.029041
Afg3l2	6053.34	-0.0714005	0.07172	-0.995546	0.319471	0.389719
Aftph	11889.1	-0.250662	0.0958801	-2.61433	0.00894039	0.0193669
Aga	599.766	-0.166142	0.109153	-1.5221	0.127985	0.177222
Agap1	20615.9	0.0804812	0.152253	0.528601	0.597082	0.660456
Agap2	34893.2	0.690639	0.217916	3.16929	0.00152813	0.00476654
Agap3	8329.85	0.650714	0.193444	3.36383	0.000768685	0.00277601
Agbl1	459.555	-0.958149	0.142266	-6.73489	1.64056e-11	1.8642e-09
Agbl3	1178.04	-0.519582	0.160888	-3.22947	0.00124022	0.00405496
Agbl4	52461.3	-1.14124	0.134197	-8.5042	1.82857e-17	1.69195e-14
Agbl5	699.251	0.12383	0.115175	1.07515	0.282308	0.350189
Agfg1	15235.6	-0.340041	0.0876739	-3.87848	0.000105113	0.000577031
Agfg2	2512.55	0.268479	0.155143	1.73052	0.0835378	0.123409
Aggf1	4949.93	-0.0167832	0.119395	-0.140569	0.88821	0.911284
Agk	4832.32	-0.475035	0.0924658	-5.13741	2.78546e-07	5.04656e-06
Agl	3762.56	-0.176089	0.0975392	-1.80531	0.0710258	0.107774
Agmo	1889.91	-0.740791	0.176276	-4.20246	2.64029e-05	0.000197473
Ago1	4335.81	0.164457	0.0821144	2.00278	0.0452012	0.0736153
Ago2	8494.91	0.34498	0.0991249	3.48026	0.000500931	0.00197958
Ago3	10083.5	-0.448619	0.0901577	-4.97593	6.49346e-07	1.00138e-05
Ago4	1681.57	-0.247949	0.125293	-1.97896	0.0478204	0.0770897
Agpat1	7440.81	0.507032	0.198532	2.5539	0.0106523	0.0222529
Agpat3	14799.2	0.230261	0.0924794	2.48986	0.0127792	0.0258497
Agpat4	4410.93	0.199542	0.141734	1.40786	0.159173	0.214026
Agpat5	5986.57	-0.158142	0.072541	-2.18003	0.0292549	0.051129
Agpat9	436.121	0.0277941	0.0872474	0.318566	0.750056	0.796607
Agps	8147.62	-0.442449	0.117715	-3.75864	0.000170838	0.000847905
Agrn	9498.05	0.413209	0.195892	2.10937	0.034913	0.0592587
Agrp	123.059	0.243375	0.170119	1.43061	0.152541	0.206394
Agt	503.292	0.667529	0.438697	1.52162	0.128105	0.177351
Agtpbp1	35830.3	-0.340485	0.116561	-2.92108	0.00348817	0.00917426
Agtrap	525.939	0.644897	0.135171	4.77095	1.83356e-06	2.29932e-05
Ahctf1	10652.8	-0.196322	0.0939874	-2.08881	0.0367244	0.0618712
Ahcy	1150.54	0.210674	0.130765	1.61109	0.10716	0.152678
Ahcyl1	20932.3	0.00798801	0.113536	0.0703569	0.94391	0.95549
Ahcyl2	17308.7	-0.154806	0.0921115	-1.68063	0.0928342	0.135089
Ahdc1	5009.75	0.693127	0.218666	3.16979	0.00152549	0.0047613
Ahi1	30261.4	-0.323594	0.135755	-2.38367	0.0171411	0.0328713
Ahnak	8777.13	0.440653	0.163109	2.70158	0.00690102	0.0156945
Ahnak2	135.973	0.23764	0.369626	0.64292	0.520276	0.590059
Ahr	1441.92	-0.46641	0.109972	-4.24117	2.22362e-05	0.000171969
Ahsa1	6592.33	0.396621	0.126759	3.12895	0.00175433	0.00531841
Ahsa2	2379.35	0.112126	0.0901874	1.24326	0.213772	0.275242
AI846148	2384.12	0.176159	0.110993	1.58713	0.112484	0.159008
Aida	3500.46	-0.447578	0.16287	-2.74806	0.00599485	0.0140226
Aif1	327.036	-0.00245247	0.124856	-0.0196425	0.984329	0.987183
Aif1l	464.141	0.423844	0.124605	3.4015	0.00067018	0.00247902
Aifm1	2619.74	-0.178763	0.0862624	-2.07232	0.0382357	0.0639104
Aifm2	417.402	0.375542	0.160725	2.33655	0.0194628	0.03652
Aifm3	5958	0.325616	0.199494	1.63221	0.102636	0.147126
Aig1	11014	-0.466578	0.112362	-4.15245	3.28939e-05	0.00023374
Aim2	704.248	-0.403861	0.159421	-2.5333	0.0112996	0.0233341
Aimp1	3780.01	-0.151183	0.0950253	-1.59097	0.111616	0.158053
Aimp2	1101.59	0.336159	0.152753	2.20067	0.0277594	0.0489979
Aip	2412.14	0.539341	0.135778	3.97222	7.12065e-05	0.000431839
Ajap1	5838.12	0.187966	0.107359	1.75082	0.0799773	0.118878
Ajuba	111.089	0.670778	0.20658	3.24707	0.00116601	0.00385613
Ak1	6949.93	0.415652	0.131947	3.15014	0.00163194	0.00502021
Ak2	1422.05	0.26702	0.0959658	2.78245	0.00539499	0.0128844
Ak3	6190.91	-0.0492823	0.101144	-0.487251	0.62608	0.686497
Ak4	2502.3	0.312298	0.145182	2.15107	0.0314704	0.0543411
Ak5	12965	-0.411224	0.117507	-3.49957	0.000466015	0.00187128
Ak6	1508.88	0.030643	0.116362	0.263341	0.792287	0.832721
Ak8	177.385	-0.224806	0.174529	-1.28807	0.197722	0.257416
Akain1	424.231	-0.0660256	0.112492	-0.586935	0.557247	0.623743
Akap1	3643.5	0.248789	0.130876	1.90094	0.0573092	0.089595
Akap10	6045.06	-0.395794	0.0767443	-5.15731	2.5052e-07	4.62285e-06
Akap11	37935.5	-0.383284	0.124337	-3.08262	0.0020519	0.00601637
Akap12	3575.74	-0.275608	0.218674	-1.26036	0.207539	0.268283
Akap13	6752.53	-0.124973	0.094987	-1.31568	0.188281	0.246886
Akap17b	4593.87	-0.737013	0.140665	-5.23949	1.61022e-07	3.26428e-06
Akap5	17090.4	-0.491947	0.191148	-2.57365	0.0100632	0.021245
Akap6	70134.7	-0.495899	0.0891478	-5.56266	2.65693e-08	7.58102e-07
Akap7	6309.9	-0.62369	0.138608	-4.49966	6.8063e-06	6.70996e-05
Akap8	7991.74	-0.172669	0.0923579	-1.86956	0.0615443	0.0952849
Akap8l	10146.5	0.00190188	0.0999443	0.0190294	0.984818	0.987562
Akap9	25333.1	-0.561219	0.170622	-3.28926	0.00100451	0.00341794
Akip1	176.808	0.424288	0.162748	2.60702	0.00913347	0.0196765
Akirin1	4496.46	-0.0200296	0.0795853	-0.251675	0.801292	0.840005
Akirin2	3806.35	-0.0918569	0.097452	-0.942586	0.345893	0.417234
Akna	403.318	0.515483	0.139277	3.70113	0.00021464	0.00102035
Akr1a1	14111.1	0.41668	0.161587	2.57868	0.009918	0.021
Akr1b10	847.555	-0.0634176	0.0885221	-0.716404	0.473742	0.545449
Akr1b3	1716.13	0.164956	0.104378	1.58038	0.11402	0.160772
Akr1c14	159.202	-0.511467	0.222957	-2.29402	0.0217895	0.0401681
Akr1e1	2215.1	-0.15047	0.0933135	-1.61252	0.106848	0.1523
Akr7a5	853.892	0.549345	0.145571	3.77373	0.000160822	0.000809042
Akt1	6124.81	0.365416	0.11043	3.30902	0.000936224	0.00324187
Akt1s1	1719.49	0.991325	0.33686	2.94284	0.00325215	0.00867552
Akt2	6994.57	0.315058	0.11189	2.81578	0.00486595	0.0118685
Akt3	59457.2	-0.666388	0.118977	-5.60099	2.13132e-08	6.34692e-07
Aktip	8456.31	0.0041701	0.0863884	0.0482715	0.9615	0.969131
AL365322.1	478.512	-0.142327	0.158402	-0.898516	0.368911	0.439962
Alad	1159.06	0.526425	0.168668	3.12108	0.0018019	0.00542453
Alas1	4279.04	0.0894934	0.0919018	0.973794	0.330159	0.400194
Alas2	343.992	1.12868	0.146045	7.7283	1.08994e-14	3.81597e-12
Alcam	42579.5	-0.374871	0.142725	-2.62654	0.00862587	0.018805
Aldh16a1	409.596	0.714426	0.251068	2.84555	0.00443344	0.0110571
Aldh18a1	2237.69	0.238058	0.0682566	3.48769	0.000487206	0.00194372
Aldh1a1	3355.31	-0.102792	0.150538	-0.682832	0.494713	0.565494
Aldh1a2	560.884	1.30786	0.492624	2.65488	0.00793356	0.0175647
Aldh1b1	557.476	0.459661	0.251076	1.83076	0.067136	0.102787
Aldh1l1	4240.51	0.311095	0.0720891	4.31542	1.59301e-05	0.000132451
Aldh1l2	543.178	-0.100794	0.114058	-0.883712	0.376851	0.447989
Aldh2	3284.91	0.890264	0.152461	5.83927	5.24291e-09	2.02133e-07
Aldh3a2	3469.03	0.225917	0.0583955	3.86873	0.000109402	0.000595784
Aldh3b1	242.736	0.353913	0.166677	2.12334	0.033725	0.0576198
Aldh5a1	6402.81	0.0945399	0.0641625	1.47344	0.140631	0.192328
Aldh6a1	4351.38	-0.329447	0.135167	-2.43733	0.0147961	0.0290892
Aldh7a1	5184.68	0.199914	0.0598156	3.34217	0.000831263	0.00295423
Aldh9a1	1089.52	0.177068	0.0956688	1.85085	0.0641918	0.0988872
Aldoa	84013	0.353407	0.120251	2.93891	0.00329372	0.00876476
Aldob	225.081	-1.36547	0.321101	-4.25247	2.11425e-05	0.000164988
Aldoc	40403.7	0.331969	0.121326	2.73617	0.00621595	0.0144252
Alg1	1351.96	0.507584	0.162449	3.12458	0.00178057	0.00537657
Alg10b	4991.99	-0.107489	0.0988051	-1.08789	0.276644	0.344178
Alg11	3642.04	-0.197266	0.125011	-1.57798	0.114569	0.161409
Alg12	1156.03	0.131074	0.0862267	1.52011	0.128484	0.177838
Alg13	1699.17	-0.632927	0.105475	-6.00075	1.96409e-09	9.2834e-08
Alg14	1013.04	-0.245128	0.0941167	-2.60452	0.00920043	0.0197912
Alg2	7110.03	0.160943	0.0928297	1.73374	0.0829641	0.122713
Alg3	466.807	0.198927	0.121012	1.64386	0.100205	0.14418
Alg5	909.894	0.114435	0.0940633	1.21657	0.223766	0.286596
Alg6	1769.48	-0.602713	0.118818	-5.07259	3.92437e-07	6.61956e-06
Alg8	718.919	0.0682276	0.0700299	0.974264	0.329926	0.400024
Alg9	1861.82	-0.00628671	0.0811145	-0.0775042	0.938222	0.951071
Alk	4026.55	-0.369071	0.178484	-2.0678	0.0386584	0.0645004
Alkbh1	2267.98	-0.11733	0.0795282	-1.47532	0.140126	0.191719
Alkbh2	295.718	0.462671	0.144958	3.19176	0.0014141	0.00449196
Alkbh3	1342.54	-0.217489	0.101628	-2.14004	0.0323518	0.0555838
Alkbh4	413.549	0.552607	0.230599	2.3964	0.016557	0.0319357
Alkbh5	4106.02	0.349186	0.079871	4.37187	1.23184e-05	0.000107312
Alkbh6	1350.36	0.556666	0.187721	2.96538	0.00302306	0.00819778
Alkbh7	541.472	1.15667	0.292079	3.96014	7.49052e-05	0.000447772
Alkbh8	5865.84	-0.399892	0.14047	-2.84681	0.0044159	0.0110219
Alms1	4828.84	-0.608125	0.13068	-4.65354	3.26287e-06	3.69792e-05
Alox12b	292.99	0.184948	0.167937	1.1013	0.270768	0.338074
Alox5ap	176.414	0.663265	0.17744	3.73796	0.000185517	0.000904813
Alox8	239.986	-0.291015	0.185347	-1.57011	0.11639	0.163562
Aloxe3	221.82	0.323409	0.205623	1.57282	0.115761	0.162837
Alpk1	628.344	-0.346675	0.137263	-2.52563	0.0115492	0.0237397
Alpl	474.455	-0.0409773	0.14656	-0.279594	0.779789	0.822187
Als2	4471.51	0.148895	0.0552809	2.69343	0.00707211	0.0160133
Als2cl	539.223	0.392539	0.172684	2.27317	0.0230162	0.0419368
Alx4	99.3334	1.8022	0.579985	3.10732	0.00188792	0.00564024
Alyref	1936.62	0.0662971	0.0869347	0.762608	0.445697	0.517344
Alyref2	204.628	0.287074	0.174403	1.64604	0.0997564	0.143631
Amacr	602.109	0.366711	0.142276	2.57747	0.00995271	0.0210631
Ambra1	11289.8	-0.295618	0.117509	-2.5157	0.0118795	0.0243264
Amd1	6773.76	0.0307329	0.0726566	0.422988	0.672304	0.728058
Amdhd2	1036.34	0.391122	0.161882	2.4161	0.0156879	0.0305413
Amer1	1074.04	0.0393882	0.0927166	0.424824	0.670965	0.727033
Amer2	5308.62	-0.0610071	0.117315	-0.520029	0.603043	0.666327
Amer3	2623.9	0.000445035	0.0868016	0.00512703	0.995909	0.996525
Amfr	9768.69	0.384263	0.111151	3.45712	0.000545991	0.00211127
Amigo1	5440.31	0.266289	0.107101	2.48634	0.0129066	0.0260464
Amigo2	454.284	0.32452	0.160877	2.01719	0.0436752	0.0714986
Ammecr1	3345.07	-0.670175	0.114528	-5.85164	4.86757e-09	1.90497e-07
Ammecr1l	2708.23	-0.211104	0.118531	-1.781	0.0749118	0.112524
Amn	171.475	1.14141	0.566782	2.01384	0.0440267	0.0720376
Amn1	2556.29	-0.437507	0.120428	-3.63293	0.000280224	0.00125519
Amot	2266.22	0.206908	0.077345	2.67513	0.00746999	0.0167242
Amotl1	2843.08	0.439436	0.116405	3.77507	0.000159965	0.000805985
Amotl2	1266.52	0.729808	0.172441	4.23221	2.3141e-05	0.000177253
Ampd2	3187.27	0.711366	0.191715	3.71054	0.000206814	0.000988953
Ampd3	1923.71	0.29145	0.117295	2.48475	0.0129641	0.0261381
Amph	27780.6	-0.361794	0.0681642	-5.30768	1.11029e-07	2.46702e-06
Amt	1360.82	0.356149	0.0880098	4.0467	5.19448e-05	0.000335023
Amy1	4195.67	-0.703485	0.170023	-4.13759	3.50965e-05	0.000246018
Amz1	1103.3	0.656664	0.172326	3.81058	0.00013864	0.00071954
Amz2	3482.75	0.272307	0.0913046	2.9824	0.00286	0.00784261
Anapc1	11595.8	-0.0741914	0.0619551	-1.1975	0.23111	0.294637
Anapc10	3459.92	-0.630315	0.123092	-5.12066	3.04463e-07	5.41016e-06
Anapc11	1853.65	0.774441	0.168412	4.5985	4.25553e-06	4.59002e-05
Anapc13	1089.97	0.132173	0.169998	0.777502	0.436863	0.508548
Anapc15	1374.26	0.198474	0.102425	1.93775	0.0526543	0.0835785
Anapc16	2706.44	0.273761	0.0911541	3.00328	0.00267088	0.00742458
Anapc2	2615.49	0.428266	0.144396	2.9659	0.00301794	0.00818731
Anapc4	5355.15	-0.0647908	0.0700613	-0.924772	0.355084	0.426062
Anapc5	13081.1	0.101261	0.0509793	1.98632	0.0469976	0.0760248
Anapc7	2135.98	0.264779	0.106965	2.47537	0.0133099	0.0266848
Angel1	479.006	-0.0126682	0.113483	-0.111631	0.911116	0.930364
Angel2	4614.24	-0.131357	0.053581	-2.45155	0.0142241	0.0281742
Angpt1	1729.24	-0.711951	0.196141	-3.6298	0.000283646	0.00126484
Angpt2	129.441	0.492041	0.255746	1.92395	0.0543612	0.0857519
Angptl2	315.587	0.578442	0.211884	2.72999	0.00633354	0.0146247
Angptl4	131.689	1.0041	0.182466	5.50296	3.73476e-08	1.01639e-06
Angptl6	549.898	0.445622	0.180537	2.46832	0.013575	0.027104
Ank	15965.2	-0.0156574	0.0668204	-0.234321	0.814736	0.851136
Ank1	6058.94	0.114387	0.100433	1.13894	0.254728	0.320519
Ank2	167636	-0.506294	0.114517	-4.42111	9.8195e-06	8.98318e-05
Ank3	89297.3	-0.417319	0.125516	-3.32484	0.000884708	0.00309827
Ankdd1a	248.289	0.314557	0.224389	1.40184	0.160963	0.215896
Ankef1	299.723	-0.69389	0.205506	-3.37651	0.00073413	0.00266845
Ankfn1	1976.05	-0.329854	0.155118	-2.12647	0.0334642	0.0572723
Ankfy1	8233.02	-0.0836777	0.0644535	-1.29826	0.194196	0.253463
Ankhd1	15751.8	-0.570355	0.14879	-3.83328	0.000126447	0.000669114
Ankib1	15857.9	-0.483303	0.115902	-4.16991	3.04724e-05	0.000220279
Ankle2	5616.37	-0.311981	0.118645	-2.62953	0.00855029	0.0186591
Ankmy2	4303.48	-0.250335	0.0890224	-2.81204	0.00492283	0.0119712
Ankra2	2877.96	-0.225031	0.106027	-2.12239	0.0338048	0.0577182
Ankrd10	7017.84	-0.0153195	0.106654	-0.143637	0.885787	0.909591
Ankrd11	26894.2	-0.365088	0.133097	-2.74302	0.00608772	0.0141861
Ankrd12	35148.4	-0.950308	0.306045	-3.10513	0.00190198	0.00567439
Ankrd13a	3018.75	0.249894	0.0838012	2.98198	0.00286389	0.00784994
Ankrd13b	2766.55	0.647779	0.143915	4.50112	6.75979e-06	6.66917e-05
Ankrd13c	8531.07	-0.332474	0.114167	-2.91216	0.00358941	0.00937067
Ankrd13d	3262.81	0.321091	0.138038	2.32612	0.0200124	0.0373599
Ankrd16	2276.81	-0.0467995	0.0574897	-0.81405	0.415616	0.487362
Ankrd17	37041	-0.465873	0.122731	-3.79587	0.000147126	0.000752416
Ankrd24	1976.97	0.041159	0.117614	0.349951	0.726376	0.776103
Ankrd26	3568.03	-0.434618	0.146348	-2.96976	0.00298032	0.00809881
Ankrd27	2808.15	0.0189135	0.0756632	0.24997	0.802611	0.840911
Ankrd28	16723.2	-0.495661	0.105046	-4.7185	2.37593e-06	2.83961e-05
Ankrd29	2074.65	-0.318253	0.170699	-1.86441	0.0622642	0.096261
Ankrd33b	12557.6	0.0916931	0.110671	0.828516	0.407378	0.478936
Ankrd34a	2290.2	0.238792	0.129002	1.85107	0.0641601	0.0988616
Ankrd34b	1449	0.165197	0.118758	1.39104	0.164213	0.219504
Ankrd34c	1919.3	-0.738039	0.150426	-4.90633	9.27973e-07	1.33123e-05
Ankrd35	774.93	0.467673	0.122909	3.80505	0.000141777	0.000731995
Ankrd37	354.37	0.510865	0.152497	3.35	0.000808109	0.00288302
Ankrd39	207.099	0.668042	0.247405	2.70019	0.00692996	0.0157499
Ankrd40	7684.39	-0.0517094	0.069208	-0.747158	0.454968	0.526407
Ankrd42	4054.83	-0.686704	0.143175	-4.79627	1.6165e-06	2.08554e-05
Ankrd44	3258.83	-0.444644	0.117088	-3.79752	0.000146149	0.000749442
Ankrd45	5606.33	-0.185629	0.056826	-3.26663	0.00108837	0.00364121
Ankrd46	8000.52	0.274807	0.13108	2.09648	0.0360394	0.0608835
Ankrd49	1279.59	-0.510651	0.147841	-3.45406	0.000552205	0.00212958
Ankrd50	6215.34	0.207835	0.0624701	3.32696	0.000878004	0.00307896
Ankrd52	3518.44	0.519821	0.138008	3.76659	0.000165491	0.000827391
Ankrd54	661.149	0.782207	0.184829	4.23205	2.31572e-05	0.000177253
Ankrd55	518.826	-0.0817591	0.169208	-0.483187	0.628963	0.68878
Ankrd6	3800.54	0.37198	0.101373	3.66941	0.000243115	0.00112798
Ankrd63	2257.04	0.876635	0.134434	6.52095	6.98624e-11	6.51077e-09
Ankrd9	579.358	0.903606	0.290728	3.10808	0.0018831	0.00562974
Anks1	4158.83	0.361407	0.21518	1.67956	0.0930433	0.135334
Anks1b	111453	-0.635876	0.13863	-4.58687	4.49943e-06	4.78143e-05
Anks3	4190.11	0.167612	0.10204	1.64261	0.100465	0.144474
Anks6	1315.65	0.241032	0.175889	1.37037	0.170573	0.226765
Ankub1	266.19	-0.217323	0.17074	-1.27283	0.203078	0.263489
Ankzf1	1677.79	0.0956755	0.109202	0.876129	0.38096	0.452126
Anln	2529.07	-0.10769	0.169089	-0.636883	0.524201	0.593731
Ano1	473.27	0.0272244	0.172553	0.157774	0.874635	0.900638
Ano10	2418.73	-0.223333	0.0938552	-2.37954	0.017334	0.0331628
Ano2	898.236	-0.068123	0.277109	-0.245835	0.80581	0.843512
Ano3	42934.4	-0.820032	0.153641	-5.33733	9.43231e-08	2.17801e-06
Ano4	17433.8	-0.718056	0.138392	-5.18858	2.11907e-07	4.01909e-06
Ano5	397.432	-0.704312	0.19278	-3.65345	0.000258743	0.0011827
Ano6	4950.8	-0.0692211	0.134555	-0.514445	0.606941	0.670045
Ano8	3270.6	0.698118	0.223531	3.12314	0.00178935	0.0053943
Anp32a	15333.8	-0.549326	0.327372	-1.67799	0.0933499	0.135734
Anp32b	1648.08	-0.349756	0.214954	-1.62712	0.103712	0.148435
Anp32e	4589.18	0.0123671	0.150852	0.0819815	0.934661	0.948574
Anpep	248.004	0.475508	0.33207	1.43195	0.152158	0.205919
Antxr1	3340.5	-0.385475	0.145897	-2.64211	0.00823917	0.0181052
Antxr2	439.881	-0.354848	0.155212	-2.28621	0.0222418	0.0408045
Anxa1	119.011	0.743235	0.367657	2.02155	0.0432233	0.0708484
Anxa11	1064.31	0.509505	0.217285	2.34487	0.0190338	0.0358169
Anxa2	637.133	1.15697	0.16516	7.00516	2.46698e-12	3.75968e-10
Anxa3	978.938	0.180491	0.0900109	2.00521	0.0449406	0.0732646
Anxa4	302.834	0.0822888	0.150784	0.545738	0.585246	0.64975
Anxa5	3660.63	-0.316787	0.188867	-1.6773	0.093483	0.135912
Anxa6	8301.1	0.0808338	0.081473	0.992154	0.321122	0.391402
Anxa7	6551	-0.0851087	0.0683412	-1.24535	0.213003	0.274497
Aoc2	232.159	0.618991	0.220358	2.80902	0.00496925	0.0120569
Aox1	816.385	0.0988815	0.142085	0.69593	0.486472	0.557333
Aox3	425.033	0.256542	0.47538	0.539657	0.589433	0.653558
Aox4	130.326	-0.33348	0.148623	-2.24379	0.0248458	0.0446397
Ap1ar	6286.48	-0.273641	0.113911	-2.40224	0.0162951	0.0315242
Ap1b1	12373.6	0.307973	0.0971284	3.17078	0.0015203	0.00475471
Ap1g1	11542.7	-0.157517	0.0622364	-2.53095	0.0113754	0.0234628
Ap1g2	187.676	0.330365	0.160642	2.05653	0.0397316	0.0660244
Ap1m1	3373.83	0.302445	0.106091	2.85081	0.00436081	0.0109033
Ap1s1	5628.96	0.982473	0.213526	4.60118	4.20106e-06	4.54261e-05
Ap1s2	3821.45	-0.306319	0.163888	-1.86907	0.0616127	0.0953562
Ap1s3	332.339	-0.471054	0.106292	-4.4317	9.34949e-06	8.65713e-05
Ap2a1	13737.4	0.597143	0.211604	2.82199	0.00477271	0.0116876
Ap2a2	18071.8	0.380775	0.110921	3.43284	0.000597297	0.00226037
Ap2b1	28536.2	0.167126	0.067841	2.4635	0.0137587	0.0274074
Ap2m1	19592.1	0.216136	0.144599	1.49473	0.134985	0.185449
Ap2s1	5894.71	0.858356	0.308414	2.78313	0.0053837	0.0128601
Ap3b1	9511.81	-0.257711	0.0686705	-3.75287	0.00017482	0.000864165
Ap3b2	10884.4	0.217745	0.0678819	3.2077	0.00133801	0.00430838
Ap3d1	14472.8	0.220792	0.0896644	2.46242	0.0138002	0.0274754
Ap3m1	4807.68	-0.331986	0.0993032	-3.34316	0.000828307	0.00294534
Ap3m2	9423.62	-0.0277607	0.0791007	-0.350954	0.725623	0.775426
Ap3s1	7819.95	-0.739493	0.155454	-4.75698	1.96513e-06	2.42904e-05
Ap3s2	3404.27	0.250395	0.113507	2.20598	0.0273854	0.0484702
Ap4e1	2332	-0.168682	0.108847	-1.54971	0.12121	0.169235
Ap4m1	1323.37	0.470209	0.133557	3.52065	0.000430485	0.00176341
Ap4s1	3596.33	-0.0151267	0.106088	-0.142586	0.886617	0.910155
Ap5b1	242.637	0.860223	0.33037	2.60381	0.00921929	0.0198284
Ap5m1	3878.92	-0.379436	0.101967	-3.72116	0.000198312	0.000955421
Ap5s1	767.733	0.441905	0.217909	2.02793	0.042567	0.0699496
Ap5z1	1187.81	0.686712	0.195484	3.51288	0.000443273	0.00180005
Apaf1	1568.11	0.064767	0.0998983	0.648329	0.516772	0.586599
Apba1	20771.7	-0.23121	0.0880704	-2.62528	0.00865772	0.0188623
Apba2	28373.4	-0.210773	0.118386	-1.78039	0.0750125	0.112636
Apba3	808.687	0.925231	0.365659	2.53031	0.0113962	0.0234774
Apbb1	20933.2	0.430362	0.207009	2.07895	0.0376216	0.063063
Apbb1ip	736.362	-0.997229	0.1822	-5.47327	4.41811e-08	1.17039e-06
Apbb2	14763.1	-0.361534	0.132908	-2.72019	0.0065245	0.0149908
Apc	64375.7	-0.658441	0.159083	-4.13897	3.48866e-05	0.000244679
Apc2	8180.74	0.778384	0.286642	2.71552	0.00661708	0.0151686
Apcdd1	1409.56	0.045774	0.113043	0.404925	0.685532	0.740094
Apeh	759.472	0.652435	0.133682	4.88049	1.05822e-06	1.46926e-05
Apex1	2126.18	0.142814	0.100323	1.42354	0.154579	0.208633
Apex2	6467.37	-0.578632	0.152433	-3.79597	0.000147065	0.000752416
Aph1a	1113.87	0.602832	0.164144	3.67259	0.000240104	0.00111641
Aph1b	2886.06	-0.300983	0.125097	-2.406	0.0161282	0.0312481
Aph1c	853.935	-0.207411	0.0717912	-2.88909	0.00386357	0.00991064
Api5	7788.8	-0.0205634	0.0847694	-0.242581	0.80833	0.845604
Apip	1400.02	-0.241794	0.108592	-2.22662	0.0259725	0.0463746
Apitd1	137.017	0.254792	0.175167	1.45456	0.14579	0.198441
Aplf	830.659	-0.21658	0.114973	-1.88374	0.0596001	0.0926175
Apln	1784.32	0.12291	0.17267	0.711821	0.476575	0.548079
Aplp1	34786.1	0.32952	0.125663	2.62226	0.00873492	0.018998
Aplp2	37411.6	-0.0254403	0.102054	-0.249283	0.803142	0.841263
Apmap	3245.2	0.136001	0.102156	1.3313	0.18309	0.240909
Apoa1bp	2023.36	0.209033	0.109207	1.91409	0.0556084	0.0873894
Apobec1	219.419	-0.250879	0.188356	-1.33194	0.182879	0.24068
Apobec3	170.874	0.0715091	0.18653	0.383365	0.701449	0.753697
Apod	8670.71	0.258537	0.15195	1.70145	0.0888578	0.130078
Apoe	64188.3	0.559978	0.158468	3.5337	0.000409785	0.00169596
Apol8	295.601	0.0926131	0.127779	0.724789	0.468582	0.540362
Apold1	348.771	0.343564	0.151314	2.27054	0.0231749	0.042158
Apoo	3267.93	-0.498363	0.096009	-5.1908	2.09394e-07	3.97725e-06
Apool	795.667	-0.538896	0.208515	-2.58445	0.00975354	0.0207322
Apopt1	1848	0.151286	0.0887664	1.70432	0.088321	0.12941
App	105158	-0.0109594	0.0665841	-0.164595	0.869262	0.896459
Appbp2	10667.7	-0.275452	0.0782184	-3.52158	0.000428983	0.00175856
Appl1	16425.8	-0.507809	0.132226	-3.84046	0.000122806	0.000654126
Appl2	7734.59	-0.15472	0.105705	-1.4637	0.143276	0.195456
Aprt	977.703	0.4526	0.223899	2.02145	0.0432337	0.0708564
Aptx	2163.67	0.186808	0.0847847	2.20332	0.0275719	0.0487532
Aqp11	850.309	0.070275	0.0881257	0.79744	0.425196	0.496976
Aqp4	8627.77	-0.301728	0.206453	-1.46148	0.143883	0.196175
Aqr	6691.57	-0.292917	0.0827064	-3.54165	0.000397631	0.00165758
Ar	4877.86	-0.546609	0.112578	-4.85538	1.20156e-06	1.62305e-05
Araf	9367.34	0.142233	0.0905158	1.57137	0.116098	0.163222
Arap1	1172.64	0.447292	0.202843	2.20511	0.0274462	0.0485641
Arap2	26255.7	-0.759378	0.13135	-5.78133	7.41102e-09	2.66673e-07
Arap3	520.633	0.383897	0.138191	2.77801	0.00546921	0.0130266
Arc	5467.1	1.10791	0.201257	5.50494	3.69296e-08	1.00925e-06
Arcn1	11282.2	-0.494239	0.184557	-2.67798	0.00740676	0.0166079
Arel1	14860.3	0.0657335	0.0676477	0.971703	0.331198	0.401304
Arf1	16530.2	0.291364	0.101611	2.86743	0.00413815	0.0104739
Arf2	3200.3	0.182526	0.114868	1.58901	0.112058	0.158575
Arf3	34980	0.482763	0.12158	3.97073	7.1653e-05	0.000434141
Arf4	5571.91	0.141552	0.0789695	1.79249	0.0730542	0.110271
Arf5	3612.11	0.783875	0.201651	3.88728	0.000101374	0.000562346
Arf6	1508.36	0.514318	0.147514	3.48657	0.000489266	0.00195014
Arfgap1	6660.88	0.237293	0.132484	1.79111	0.0732755	0.110463
Arfgap2	3043.51	0.562498	0.124876	4.50445	6.65461e-06	6.57543e-05
Arfgap3	1692.39	-0.24935	0.0698177	-3.57144	0.000355029	0.00151086
Arfgef1	18245.4	-0.473442	0.11123	-4.25641	2.07739e-05	0.000163094
Arfgef2	9272.18	-0.0182476	0.0706928	-0.258126	0.79631	0.836203
Arfgef3	33764.9	-0.620225	0.0985918	-6.29084	3.15755e-10	2.12591e-08
Arfip1	152.101	0.258491	0.155775	1.65939	0.0970373	0.140512
Arfip2	4546.9	0.354426	0.0915816	3.87005	0.000108812	0.000593497
Arfrp1	1435.37	0.587045	0.117739	4.98598	6.16495e-07	9.55273e-06
Arg2	317.332	0.0686229	0.224367	0.305851	0.759718	0.804758
Arglu1	15832.1	-0.489105	0.149057	-3.28132	0.00103324	0.00349101
Arhgap1	5609.05	0.0467775	0.0828114	0.564868	0.572164	0.637262
Arhgap10	9321.35	-0.387223	0.148251	-2.61194	0.0090029	0.0194762
Arhgap11a	227.992	-0.599171	0.25769	-2.32517	0.0200631	0.0374405
Arhgap12	6510.47	-0.317088	0.119365	-2.65646	0.00789665	0.017498
Arhgap15	5491.97	-0.887039	0.147587	-6.01028	1.85208e-09	8.82053e-08
Arhgap17	2804.44	-0.103902	0.160459	-0.647533	0.517287	0.587114
Arhgap18	3188.04	-0.34233	0.130469	-2.62384	0.00869443	0.0189195
Arhgap19	430.999	0.0906762	0.102728	0.882679	0.37741	0.448541
Arhgap20	16717.7	-0.681392	0.108091	-6.30385	2.90333e-10	2.01122e-08
Arhgap21	21141.1	-0.382193	0.0886652	-4.31052	1.62871e-05	0.000134727
Arhgap22	1508.99	-0.122129	0.199358	-0.612613	0.540132	0.60853
Arhgap23	7158.1	0.347082	0.133671	2.59655	0.00941664	0.0201587
Arhgap24	1488.47	-0.195916	0.13082	-1.4976	0.134237	0.184533
Arhgap25	1502.82	-0.148992	0.118781	-1.25434	0.20972	0.270832
Arhgap26	32026.8	-0.24839	0.128446	-1.93381	0.0531371	0.0841592
Arhgap27	831.739	0.342429	0.160554	2.1328	0.0329411	0.0565081
Arhgap28	128.167	0.812887	0.271171	2.99769	0.00272033	0.00753778
Arhgap29	4600.99	-0.416181	0.139087	-2.99223	0.00276948	0.00764945
Arhgap30	293.363	-0.0280161	0.171776	-0.163097	0.870442	0.897462
Arhgap31	3414.01	0.134947	0.135509	0.995847	0.319324	0.389577
Arhgap32	52755.8	-0.36134	0.0757268	-4.77163	1.82745e-06	2.29833e-05
Arhgap33	3110.72	0.673699	0.205847	3.27281	0.00106483	0.0035763
Arhgap35	24574.4	-0.176622	0.0891262	-1.98171	0.047512	0.0766465
Arhgap39	7945.94	0.0289547	0.120875	0.239542	0.810685	0.847588
Arhgap4	272.026	0.330772	0.102549	3.22549	0.00125757	0.00410286
Arhgap42	6317.24	-0.89363	0.127553	-7.00596	2.45293e-12	3.75968e-10
Arhgap44	16846.4	-0.207959	0.0945021	-2.20058	0.0277659	0.0490026
Arhgap45	325.93	0.495214	0.162311	3.05101	0.0022807	0.00656101
Arhgap5	32306.6	-0.815263	0.173207	-4.70688	2.5154e-06	2.96763e-05
Arhgap6	3778.18	-0.379335	0.14117	-2.68707	0.00720811	0.0162612
Arhgdia	8099.86	0.640623	0.158404	4.04424	5.24942e-05	0.000337977
Arhgdib	556.053	0.258188	0.206656	1.24936	0.211533	0.272847
Arhgdig	1872.7	0.612279	0.191186	3.20252	0.0013623	0.00436703
Arhgef1	1464.32	0.461062	0.169915	2.71348	0.00665804	0.0152436
Arhgef10	4459.96	0.204804	0.118365	1.73028	0.0835802	0.123441
Arhgef10l	3769.87	0.435121	0.180874	2.40565	0.0161436	0.0312732
Arhgef11	11219	-0.0816119	0.103968	-0.784972	0.43247	0.504295
Arhgef12	31311	-0.217323	0.0754001	-2.88226	0.00394834	0.0100782
Arhgef15	1064.61	0.0172179	0.109977	0.156559	0.875592	0.901337
Arhgef17	14837.2	0.330119	0.119541	2.76157	0.00575248	0.0135561
Arhgef18	4763.36	0.204891	0.1087	1.88492	0.0594407	0.0924142
Arhgef19	376.35	0.93238	0.201495	4.62731	3.70451e-06	4.09805e-05
Arhgef2	11160	0.14178	0.10207	1.38904	0.164821	0.220294
Arhgef25	7493.96	0.230655	0.113603	2.03035	0.0423208	0.0696069
Arhgef26	2662.55	-0.0510875	0.0920598	-0.554938	0.578937	0.643959
Arhgef28	5268.87	-0.076775	0.0790805	-0.970846	0.331625	0.401746
Arhgef3	8607.56	-0.229014	0.0518947	-4.41306	1.0192e-05	9.24564e-05
Arhgef33	343.963	-0.291642	0.19311	-1.51024	0.130983	0.180736
Arhgef37	977.342	1.7386	0.521526	3.33369	0.000857033	0.00302178
Arhgef4	14370.3	0.330835	0.119963	2.7578	0.00581918	0.0136809
Arhgef40	1358.31	0.510278	0.131604	3.87737	0.000105594	0.000579112
Arhgef5	276.306	0.0645532	0.224888	0.287046	0.774077	0.81731
Arhgef6	1410.26	-0.284012	0.131501	-2.15977	0.0307905	0.0533449
Arhgef7	11138.6	0.253191	0.103595	2.44405	0.0145236	0.0286629
Arhgef9	42300.7	-0.457501	0.101732	-4.49713	6.88773e-06	6.77476e-05
Arid1a	8653.98	0.0277888	0.118187	0.235125	0.814111	0.850621
Arid1b	21755.9	-0.266405	0.163174	-1.63265	0.102543	0.147038
Arid2	7611.79	-0.370953	0.103713	-3.57672	0.000347929	0.00148748
Arid3a	749.119	0.311565	0.114996	2.70935	0.00674153	0.0154048
Arid3b	925.486	-0.0653071	0.138924	-0.470091	0.63829	0.697344
Arid4a	7837.51	-0.587799	0.187976	-3.12698	0.00176611	0.00534598
Arid4b	13432.2	-0.650558	0.137324	-4.73741	2.16468e-06	2.62559e-05
Arid5a	476.229	0.60186	0.165766	3.63078	0.000282563	0.00126044
Arid5b	8277.23	-0.445531	0.104759	-4.2529	2.11019e-05	0.00016477
Arih1	16592.8	-0.385823	0.0949351	-4.06407	4.82242e-05	0.000315344
Arih2	5271.74	0.0393061	0.0631074	0.622844	0.533387	0.602061
Arl1	9374.6	0.00979805	0.111676	0.0877367	0.930086	0.944819
Arl10	522.492	0.6625	0.202095	3.27815	0.00104488	0.00352027
Arl13b	2891.16	-0.484229	0.130015	-3.72441	0.000195774	0.000946475
Arl14ep	3298.03	0.0517461	0.0908138	0.569804	0.568811	0.634384
Arl15	18202.9	-0.48836	0.149154	-3.27421	0.0010596	0.0035615
Arl16	1055.48	0.0528387	0.130604	0.404573	0.685792	0.740252
Arl2	2139.66	0.441348	0.130613	3.37906	0.000727334	0.00264957
Arl2bp	5565.13	0.380444	0.10854	3.5051	0.000456431	0.00183909
Arl3	5059.93	-0.00751013	0.142276	-0.0527858	0.957903	0.966633
Arl4a	4731.52	-0.443818	0.128513	-3.45349	0.000553391	0.00213225
Arl4c	2972.41	-0.0349212	0.0792058	-0.440892	0.659291	0.716842
Arl4d	913.609	1.23031	0.251899	4.88415	1.03879e-06	1.44382e-05
Arl5a	8821.21	-0.178404	0.0980148	-1.82017	0.068733	0.104811
Arl5b	2802.2	-0.168155	0.086624	-1.94121	0.0522331	0.0830115
Arl6	2826.51	-0.434472	0.134127	-3.23925	0.00119845	0.00394027
Arl6ip1	12971.3	0.224175	0.117322	1.91076	0.056035	0.0879569
Arl6ip4	1695.38	0.253815	0.12605	2.01361	0.04405	0.0720393
Arl6ip5	5406.26	0.013721	0.103272	0.132863	0.894301	0.915938
Arl6ip6	1449.04	-0.410519	0.136873	-2.99926	0.00270636	0.00751032
Arl8a	6326.12	-0.105933	0.116688	-0.907834	0.363966	0.435026
Arl8b	17914	-0.46049	0.172931	-2.66285	0.0077481	0.0172307
Armc1	5410.97	-0.0652698	0.104506	-0.624553	0.532264	0.601234
Armc10	1642.91	-0.135076	0.0895569	-1.50827	0.131486	0.181373
Armc2	1350.77	-0.295692	0.0975282	-3.03187	0.00243048	0.00688937
Armc4	176.966	-0.935243	0.170615	-5.48161	4.21484e-08	1.12575e-06
Armc5	662.051	0.709067	0.270928	2.61718	0.00886589	0.0192248
Armc6	1620.34	0.651006	0.31743	2.05086	0.0402803	0.0667678
Armc7	497.656	0.418771	0.158901	2.63542	0.00840339	0.0184192
Armc8	11352.8	-0.369129	0.0910372	-4.05471	5.01963e-05	0.0003261
Armc9	5018.31	-0.0586047	0.103602	-0.565671	0.571618	0.636857
Armcx1	5009.05	-0.0975119	0.0862102	-1.13109	0.258015	0.324089
Armcx2	5657.24	-0.157856	0.0852889	-1.85084	0.0641919	0.0988872
Armcx3	4550.85	-0.100571	0.0893596	-1.12547	0.260391	0.326756
Armcx4	5178.09	0.0924739	0.130326	0.70956	0.477977	0.549398
Armcx6	201.275	0.196654	0.155594	1.26389	0.20627	0.267042
Armt1	1558.79	0.118666	0.081321	1.45923	0.144502	0.196895
Arnt	5958.53	-0.352666	0.105075	-3.35633	0.000789835	0.00283815
Arnt2	26009.9	-0.140683	0.0836133	-1.68254	0.0924637	0.134597
Arntl	6083.1	-0.350854	0.0910632	-3.85286	0.000116744	0.000628032
Arntl2	1788.19	-0.491809	0.105114	-4.6788	2.88559e-06	3.33154e-05
Arpc1a	7598.97	0.550053	0.132697	4.14517	3.39563e-05	0.000239973
Arpc1b	861.099	0.570891	0.142992	3.99247	6.53895e-05	0.000403907
Arpc2	9331.99	-0.154147	0.113658	-1.35623	0.175025	0.231737
Arpc3	8348.44	0.129762	0.162839	0.796874	0.425524	0.497315
Arpc4	5067.84	0.453463	0.165681	2.73696	0.00620097	0.0143982
Arpc5	4937.24	0.327466	0.107564	3.04439	0.00233151	0.00666424
Arpc5l	5599.37	0.0104069	0.157086	0.0662498	0.947179	0.957752
Arpin	1317.94	0.130935	0.0970933	1.34855	0.177481	0.23446
Arpp19	33390.4	-0.572924	0.170532	-3.35964	0.000780443	0.00280985
Arpp21	101636	-0.589521	0.10742	-5.488	4.0651e-08	1.09026e-06
Arrb1	29619.5	0.321918	0.099994	3.21937	0.00128473	0.00416487
Arrb2	1966.94	0.4188	0.13155	3.18359	0.00145461	0.00458804
Arrdc1	489.067	0.130272	0.125988	1.034	0.301137	0.370142
Arrdc2	540.805	0.332289	0.118743	2.79839	0.00513574	0.0123843
Arrdc3	5459.91	-0.220493	0.0962503	-2.29083	0.0219733	0.0404034
Arrdc4	586.965	0.082374	0.106957	0.770162	0.441204	0.512772
Arsa	1415.6	0.568358	0.235409	2.41435	0.0157634	0.0306659
arsb	7946.36	-0.448879	0.0944765	-4.75122	2.02193e-06	2.48266e-05
Arsg	1809.5	-0.108192	0.12001	-0.901521	0.367311	0.438297
Arsj	492.449	-0.293968	0.146451	-2.00728	0.04472	0.0729692
Arsk	992.29	-0.232954	0.0957965	-2.43176	0.0150257	0.0294467
Art3	277.103	-0.251591	0.119038	-2.11354	0.0345543	0.0587655
Arv1	766.409	0.168013	0.10163	1.65319	0.0982924	0.14198
Arvcf	2243.05	0.587058	0.196582	2.98633	0.00282347	0.00777177
Arx	731.635	0.487805	0.151639	3.21688	0.00129594	0.00419586
Arxes1	616.447	0.599294	0.160863	3.7255	0.000194931	0.00094327
Arxes2	2025.26	0.277542	0.121158	2.29075	0.0219782	0.0404066
As3mt	858.115	-0.0122034	0.0757534	-0.161093	0.87202	0.898588
Asah1	6909.16	-0.425414	0.0979645	-4.34253	1.40851e-05	0.000119488
Asah2	1928.84	-0.670509	0.152473	-4.39757	1.09469e-05	9.7595e-05
Asap1	30781.5	-0.614759	0.120896	-5.08502	3.67597e-07	6.29874e-06
Asap2	3792.51	-0.189049	0.110357	-1.71306	0.0867006	0.127381
Asap3	326.393	0.684766	0.150062	4.56324	5.03706e-06	5.24941e-05
Asb1	3151.51	0.378309	0.163273	2.31704	0.0205018	0.0381636
Asb11	473.052	-0.575826	0.144118	-3.99551	6.4555e-05	0.000399735
Asb13	3464.49	-0.254331	0.106293	-2.39273	0.0167236	0.0322042
Asb18	235.131	-0.203743	0.127224	-1.60145	0.109277	0.155165
Asb2	296.352	0.496923	0.179978	2.76102	0.00576204	0.0135702
Asb3	6379.19	-0.530797	0.0979476	-5.41919	5.98694e-08	1.50009e-06
Asb5	621.571	-0.872489	0.152697	-5.71385	1.10451e-08	3.6882e-07
Asb6	1513.33	0.668112	0.218033	3.06428	0.00218198	0.00632476
Asb7	3039.08	-0.352465	0.110163	-3.19949	0.0013767	0.00440231
Asb8	2471.32	0.175427	0.0874541	2.00593	0.0448634	0.0731663
Ascc1	1163.56	0.118238	0.0806834	1.46545	0.142797	0.19488
Ascc2	2124.8	0.0068153	0.107396	0.0634597	0.9494	0.959549
Ascc3	13422.9	-0.606361	0.119621	-5.06903	3.99844e-07	6.71801e-06
Ascl1	232.728	-0.471076	0.313504	-1.50262	0.132938	0.183064
Asf1a	1038.87	-0.136733	0.116766	-1.171	0.241599	0.30623
Ash1l	27122.6	-0.395726	0.119848	-3.30191	0.000960301	0.00330756
Ash2l	3234.82	0.0589075	0.0531799	1.1077	0.26799	0.335027
Asic1	4616.61	0.29901	0.103928	2.8771	0.00401346	0.0102095
Asic2	79947.4	-0.565617	0.211979	-2.66827	0.00762422	0.0169902
Asic4	1290.84	1.09212	0.35797	3.05087	0.00228177	0.00656262
Asl	691.556	0.332533	0.125112	2.65788	0.00786332	0.017442
Asna1	3727.61	0.269977	0.108557	2.48697	0.0128835	0.0260061
Asns	8834.65	-0.104666	0.0934444	-1.12009	0.262674	0.329047
Aspa	2564.19	-0.69602	0.134225	-5.18547	2.15472e-07	4.07478e-06
Aspg	268.734	1.51683	0.24577	6.17172	6.75498e-10	3.85019e-08
Asph	17062.6	-0.393714	0.0840223	-4.68582	2.7884e-06	3.23374e-05
Asphd1	1061.18	0.851547	0.203699	4.18041	2.90982e-05	0.000212599
Asphd2	5308.55	0.631265	0.284658	2.21762	0.0265805	0.0472648
Aspn	217.214	-0.890709	0.239438	-3.72	0.000199225	0.000959033
Aspscr1	1622.12	0.455315	0.239319	1.90255	0.0570999	0.089354
Asrgl1	11501.2	0.0925072	0.0644963	1.4343	0.151486	0.205267
Ass1	1436.36	0.247156	0.138778	1.78094	0.0749218	0.112526
Aste1	1009.18	-0.333546	0.0922449	-3.61587	0.000299337	0.00131937
Astn1	42677.5	-0.412486	0.100241	-4.11495	3.8727e-05	0.000266138
Astn2	32823.1	-1.04898	0.133112	-7.88039	3.2635e-15	1.50983e-12
Asxl1	7220.72	-0.313544	0.0767226	-4.08672	4.37512e-05	0.000292924
Asxl2	7576.05	-0.421337	0.0993933	-4.23909	2.24423e-05	0.000172533
Asxl3	5070.55	-0.745909	0.130745	-5.70506	1.163e-08	3.84325e-07
Atad1	11456.7	-0.399635	0.0938023	-4.2604	2.04064e-05	0.000160892
Atad2	2129.48	-0.928618	0.14671	-6.32962	2.45767e-10	1.73971e-08
Atad2b	7596.13	-0.546361	0.132341	-4.12845	3.6522e-05	0.000253269
Atad3a	2686.65	0.322238	0.143498	2.2456	0.0247298	0.0444622
Atad5	1037.04	-0.516718	0.128277	-4.02813	5.62217e-05	0.000356658
Atat1	1609.48	0.180334	0.126902	1.42105	0.155302	0.209474
Atcay	14068.1	0.405571	0.114187	3.55181	0.000382592	0.00160628
Atf1	1480.64	-0.115273	0.0915809	-1.2587	0.208139	0.268977
Atf2	16395.4	-0.528872	0.099803	-5.29916	1.16337e-07	2.55862e-06
Atf4	6430.81	0.830409	0.22075	3.76177	0.000168715	0.000839301
Atf5	459.035	1.32854	0.269919	4.92198	8.56716e-07	1.254e-05
Atf6	15956.6	-0.393767	0.0889832	-4.42518	9.63617e-06	8.85821e-05
Atf6b	1499.9	0.909753	0.234965	3.87186	0.000108007	0.0005896
Atf7ip	11266.7	-0.280176	0.095077	-2.94683	0.00321051	0.00858213
Atg10	4167.62	-0.563154	0.144444	-3.89876	9.66872e-05	0.000543365
Atg101	1425.58	0.77046	0.196827	3.91441	9.06263e-05	0.000516486
Atg12	5661.69	-0.151081	0.109726	-1.3769	0.168543	0.224481
Atg13	3277.74	0.137913	0.0733949	1.87905	0.0602378	0.0935075
Atg14	1876.17	0.156242	0.0821493	1.90193	0.0571801	0.0894287
Atg16l1	6555.47	0.0333378	0.089844	0.371063	0.710591	0.762444
Atg16l2	1886.97	-0.0339357	0.105136	-0.322779	0.746863	0.793867
Atg2a	2819.5	0.536589	0.203262	2.63989	0.00829332	0.0182118
Atg2b	9031.42	-0.0759949	0.0523924	-1.45049	0.146921	0.199813
Atg3	5011.11	-0.512161	0.167139	-3.06428	0.00218194	0.00632476
Atg4a	1310.01	-0.815242	0.12738	-6.40008	1.55299e-10	1.19746e-08
Atg4b	3797.02	0.319143	0.10089	3.16327	0.00156006	0.00484164
Atg4c	6492.39	-0.435551	0.0938077	-4.64302	3.43357e-06	3.86098e-05
Atg4d	1300.88	0.681535	0.204391	3.33446	0.000854637	0.00301579
Atg5	2895.31	-0.192646	0.0910019	-2.11695	0.0342644	0.0583489
Atg7	2486.69	-0.0228988	0.114287	-0.200362	0.841197	0.872727
Atg9a	4641.27	0.281604	0.170507	1.65157	0.0986224	0.142346
Atg9b	211.096	0.5215	0.203424	2.56362	0.0103588	0.021752
Athl1	305.256	0.729156	0.179004	4.0734	4.63313e-05	0.000306056
Atic	1897.8	0.275495	0.083678	3.29232	0.000993643	0.00339559
Atl1	10875.9	-0.240651	0.0916901	-2.62462	0.00867461	0.0188922
Atl2	5618.44	-0.0979912	0.0758468	-1.29196	0.19637	0.255965
Atl3	3861.66	-0.140465	0.0803264	-1.74868	0.0803464	0.119386
Atm	4896.68	-0.34493	0.0904672	-3.81277	0.00013742	0.000714915
Atmin	5864.55	0.133718	0.0688896	1.94104	0.052253	0.0830228
Atox1	1564.83	0.863915	0.320453	2.69592	0.00701943	0.0159116
Atp10a	2882.71	0.0498802	0.145343	0.343189	0.731456	0.78018
Atp10b	234.298	-0.684952	0.187044	-3.66199	0.000250265	0.0011533
Atp11a	7345.51	0.0696621	0.11662	0.59734	0.55028	0.617385
Atp11b	11087.5	-0.862064	0.145182	-5.93782	2.88843e-09	1.2514e-07
Atp11c	5162.07	-0.584465	0.146501	-3.98948	6.6218e-05	0.000408276
Atp13a1	3292.08	0.305618	0.137403	2.22425	0.0261314	0.0466326
Atp13a2	6786.43	0.76534	0.253761	3.01598	0.00256148	0.00717435
Atp13a3	9781.91	-0.29077	0.103266	-2.81573	0.0048666	0.0118685
Atp13a4	846.908	-0.292514	0.146967	-1.99033	0.0465545	0.0754683
Atp13a5	2719.57	-0.466061	0.120507	-3.86751	0.000109951	0.000597695
Atp1a1	57279	0.112666	0.120752	0.933034	0.350803	0.422097
Atp1a2	68304.2	0.42901	0.115792	3.70501	0.000211379	0.00100706
Atp1a3	59450.6	0.740278	0.180252	4.10691	4.00985e-05	0.000274445
Atp1b1	72225.9	-0.167222	0.157236	-1.06351	0.287551	0.355908
Atp1b2	5697.88	0.234792	0.156881	1.49662	0.134492	0.184849
Atp1b3	9557.05	-0.125401	0.0711391	-1.76276	0.0779405	0.116338
Atp2a2	67837.8	0.00021385	0.0850879	0.00251328	0.997995	0.998149
Atp2a3	433.537	0.567833	0.107669	5.27389	1.33565e-07	2.84572e-06
Atp2b1	122018	-0.57823	0.17919	-3.22691	0.00125134	0.00408513
Atp2b2	95006.4	-0.0663437	0.104077	-0.637446	0.523834	0.593419
Atp2b3	10186.7	-0.0333934	0.0929676	-0.359194	0.71945	0.769846
Atp2b4	21313.8	-0.0657904	0.134069	-0.490719	0.623625	0.684729
Atp2c1	23703.4	-0.274645	0.0847085	-3.24224	0.00118596	0.00391154
Atp5a1	53481.3	0.283159	0.10165	2.78561	0.00534267	0.012781
Atp5b	65235.2	0.322488	0.104299	3.09195	0.00198846	0.00588212
Atp5c1	17041	0.0062047	0.0862233	0.0719608	0.942633	0.954571
Atp5d	7967.46	0.865517	0.208841	4.14439	3.40723e-05	0.000240268
Atp5e	3362.32	1.55695	0.527471	2.95173	0.00316002	0.00848393
Atp5f1	16851.1	0.0339222	0.0855054	0.396726	0.69157	0.744935
Atp5g1	7291.64	0.428644	0.203556	2.10578	0.0352239	0.0597316
Atp5g2	2262.27	0.554005	0.204378	2.71069	0.00671444	0.0153456
Atp5g3	5986.63	1.22566	0.308032	3.979	6.92044e-05	0.000422399
Atp5h	15343.3	-0.113199	0.123752	-0.914724	0.360337	0.431205
Atp5j	6374.73	0.28143	0.129148	2.17912	0.0293227	0.0512024
Atp5j2	8563.46	0.525058	0.200268	2.62178	0.00874718	0.0190165
Atp5k	6457.98	1.24838	0.436903	2.85734	0.00427208	0.0107332
Atp5l	5058.41	0.821893	0.212341	3.87064	0.000108552	0.000592326
Atp5o	9769.17	0.472455	0.143704	3.2877	0.00101009	0.0034316
Atp5s	1079.28	-0.42251	0.190597	-2.21678	0.0266385	0.0473407
Atp5sl	1958.56	0.217575	0.0946106	2.29969	0.021466	0.0396563
Atp6ap1	17667.4	0.221607	0.121869	1.81841	0.069001	0.105145
Atp6ap1l	1231.85	-0.134854	0.0902944	-1.49349	0.135308	0.185834
Atp6ap2	17676	0.0509337	0.124292	0.409791	0.681959	0.736605
Atp6v0a1	32587.6	0.0133223	0.0550774	0.241884	0.80887	0.846032
Atp6v0a2	4499.31	0.324342	0.078283	4.14319	3.42503e-05	0.000241129
Atp6v0a4	146.757	-0.339148	0.205811	-1.64786	0.0993808	0.143233
Atp6v0b	10738.7	0.443376	0.196809	2.25282	0.0242703	0.0437819
Atp6v0d1	11355.5	0.134052	0.0836772	1.60201	0.109152	0.155022
Atp6v0e	2120.12	0.296553	0.118459	2.50343	0.0122996	0.025045
Atp6v0e2	16823.2	0.222821	0.126485	1.76163	0.0781318	0.116577
Atp6v1a	37394	-0.0365701	0.0839031	-0.435862	0.662937	0.719885
Atp6v1b2	31903	0.365638	0.119863	3.05046	0.00228494	0.00656468
Atp6v1c1	18542.2	0.0143072	0.0928717	0.154053	0.877568	0.903083
Atp6v1d	20584.6	-0.463542	0.169755	-2.73065	0.00632089	0.0146071
Atp6v1e1	22622.3	0.230544	0.119737	1.92542	0.0541771	0.0855345
Atp6v1f	3478.16	0.647995	0.231973	2.79341	0.0052156	0.0125372
Atp6v1g1	4670.71	0.485001	0.146482	3.31099	0.000929661	0.00322518
Atp6v1g2	15758.4	-0.294753	0.218223	-1.3507	0.176792	0.233666
Atp6v1h	16318	-0.0691448	0.111078	-0.622487	0.533621	0.602189
Atp7a	1547.2	-0.270135	0.105956	-2.5495	0.0107878	0.0224811
Atp7b	239.256	-0.0505229	0.118752	-0.425448	0.67051	0.726601
Atp8a1	50082.6	-0.370354	0.0678654	-5.45718	4.83742e-08	1.25232e-06
Atp8a2	15349.9	-0.384179	0.122293	-3.14146	0.00168105	0.00513351
Atp8b1	1140.29	-0.763428	0.117216	-6.513	7.36652e-11	6.72014e-09
Atp8b2	6423.46	0.315196	0.132645	2.37624	0.0174902	0.0333925
Atp9a	22287.9	0.586874	0.159298	3.68413	0.000229481	0.00107496
Atp9b	18574	-0.337524	0.0857268	-3.93721	8.24346e-05	0.000479757
Atpaf1	4720.1	-0.175687	0.0658056	-2.66979	0.00758978	0.0169339
Atpaf2	1764.14	0.0716995	0.0719411	0.996642	0.318938	0.389179
Atpif1	12515.2	-0.238	0.180726	-1.31691	0.187868	0.246445
Atr	4718.24	-0.649808	0.135654	-4.79018	1.66628e-06	2.13446e-05
Atraid	2948.3	0.354457	0.170041	2.08454	0.0371109	0.0623925
Atrn	27018.1	-0.319965	0.083433	-3.83499	0.000125571	0.000666657
Atrnl1	44208.3	-0.561255	0.104347	-5.37876	7.50014e-08	1.80254e-06
Atrx	41867	-0.798126	0.185971	-4.29166	1.77343e-05	0.000144113
Atxn1	35617.7	-0.399784	0.147259	-2.71483	0.00663093	0.0151976
Atxn10	17443.6	-0.160249	0.0706737	-2.26744	0.0233631	0.0423933
Atxn1l	3488.51	0.159436	0.0864647	1.84394	0.0651913	0.100272
Atxn2	11274.6	-0.240223	0.0874429	-2.7472	0.00601057	0.0140504
Atxn2l	4051.26	0.295173	0.108664	2.71638	0.00659993	0.0151373
Atxn3	4555.32	-0.140623	0.0962005	-1.46178	0.143803	0.196086
Atxn7	6359.94	-0.329524	0.104042	-3.16723	0.00153897	0.00479028
Atxn7l1	7368.76	-0.26472	0.172334	-1.53609	0.124516	0.173104
Atxn7l2	1025.72	0.192322	0.145999	1.31729	0.187743	0.246355
Atxn7l3	9734.63	0.598227	0.307063	1.94822	0.0513881	0.0818998
Atxn7l3b	10637.3	0.307063	0.12571	2.44263	0.0145808	0.028756
Auh	4907.87	0.0436824	0.101391	0.430832	0.66659	0.7232
Aup1	2444.88	0.408819	0.12748	3.20693	0.00134162	0.0043157
Aurkaip1	2757.07	0.475883	0.150107	3.17029	0.00152285	0.00475809
Auts2	77128.4	-0.269957	0.237702	-1.13569	0.256086	0.321978
Aven	1550.56	-0.213825	0.129218	-1.65477	0.0979721	0.141612
Avl9	9247.28	-0.417521	0.119988	-3.4797	0.000501978	0.00198251
Avpi1	1214.76	0.519513	0.219811	2.36345	0.0181055	0.0343194
AW011738	131.645	1.01044	0.206259	4.89892	9.6367e-07	1.36494e-05
Axin1	2794.55	0.0444331	0.110627	0.401647	0.687944	0.741784
Axin2	1981.1	0.321458	0.129258	2.48695	0.0128842	0.0260061
Axl	2350.77	0.38048	0.13173	2.88833	0.00387296	0.00992489
Azi2	8479.95	-0.297065	0.117406	-2.53024	0.0113985	0.0234786
Azin1	15244.9	-0.121687	0.079731	-1.52622	0.126955	0.175985
Azin2	1820.56	0.51233	0.191489	2.6755	0.00746169	0.0167085
B2m	7011.86	-0.797682	0.342678	-2.32779	0.0199234	0.0372313
B3galnt1	3648.7	-0.0885264	0.0830246	-1.06627	0.286303	0.354635
B3galnt2	2539.77	-0.218504	0.0901917	-2.42267	0.0154071	0.0300608
B3galt1	55106.6	-0.716772	0.128649	-5.57155	2.52489e-08	7.29773e-07
B3galt2	7741.32	-0.756807	0.200037	-3.78333	0.000154744	0.000784255
B3galt4	187.552	0.61137	0.258266	2.36721	0.0179228	0.0340138
B3galt5	3334.96	0.224706	0.110074	2.04142	0.0412091	0.0680723
B3galt6	782.505	0.40848	0.189864	2.15144	0.0314416	0.0543059
B3gat1	10407.3	0.198762	0.0722905	2.74949	0.00596878	0.0139717
B3gat2	873.084	-0.282761	0.10339	-2.73491	0.00623972	0.0144596
B3gat3	5779.17	0.429738	0.184354	2.33104	0.0197512	0.0369575
B3glct	2806.47	-0.323917	0.0954	-3.39535	0.000685407	0.00252166
B3gnt9	209.144	-0.00140711	0.159436	-0.00882551	0.992958	0.993956
B3gntl1	1733.47	-0.123018	0.110693	-1.11134	0.266423	0.333196
B430305J03Rik	160.151	0.65892	0.291597	2.25969	0.0238403	0.0431202
B4galnt1	5835.5	0.240064	0.0986464	2.43358	0.0149502	0.0293253
B4galnt3	159.099	0.0654469	0.187844	0.348412	0.727531	0.777023
B4galnt4	4376.43	0.252932	0.122494	2.06486	0.0389364	0.0649308
B4galt1	728.158	0.101549	0.100824	1.0072	0.313841	0.383538
B4galt2	3977.64	0.347124	0.173338	2.00258	0.0452219	0.0736398
B4galt3	1814.11	0.355384	0.185507	1.91575	0.0553973	0.0871045
B4galt4	1625.42	-0.0191332	0.087219	-0.219369	0.826362	0.861406
B4galt5	4299.66	0.29092	0.119707	2.43027	0.0150874	0.0295543
B4galt6	10153.6	-0.300248	0.109419	-2.74403	0.006069	0.0141528
B4galt7	1200.18	0.364105	0.177289	2.05373	0.0400014	0.0663736
B4gat1	5126.85	0.554676	0.217534	2.54984	0.0107772	0.0224631
B9d1	1036.82	0.150623	0.0859703	1.75204	0.0797669	0.118579
B9d2	480.797	0.908477	0.225441	4.02979	5.58275e-05	0.000354853
Baalc	12948	-0.365013	0.180142	-2.02625	0.0427389	0.0701876
Babam1	3251.73	0.223552	0.127891	1.74798	0.0804669	0.119494
Bace1	7588.21	0.184816	0.0619818	2.98178	0.00286574	0.00785296
Bace2	575.208	-1.22368	0.131924	-9.27561	1.76609e-20	3.81299e-17
Bach1	1421.68	0.302844	0.0775884	3.90321	9.49253e-05	0.000536034
Bach2	7107.1	-0.569702	0.170959	-3.33238	0.000861055	0.00302936
Bad	1450.92	0.543507	0.161807	3.35899	0.00078228	0.00281569
Bag1	4789.14	-0.0795865	0.103814	-0.766629	0.443302	0.514841
Bag2	611.273	-0.172019	0.117015	-1.47006	0.141545	0.193354
Bag3	297.685	0.333529	0.163494	2.04001	0.0413489	0.0682683
Bag4	7711.49	-0.449368	0.136708	-3.28707	0.00101235	0.00343555
Bag5	3418.21	0.252215	0.0855671	2.94757	0.00320279	0.00856501
Bag6	8173.91	0.592338	0.223826	2.64643	0.00813468	0.0179212
Bahcc1	1387.44	0.636654	0.208668	3.05104	0.00228048	0.00656101
Bahd1	2327.61	0.637019	0.167593	3.80098	0.000144125	0.000741461
Baiap2	23336.5	0.522908	0.131528	3.97566	7.01858e-05	0.000426848
Baiap3	1006.98	1.20872	0.534737	2.2604	0.0237962	0.0430602
Bak1	790.101	0.103712	0.146697	0.706983	0.479577	0.550895
Bambi	191.487	0.564892	0.159429	3.54321	0.000395288	0.0016486
Banf1	916.899	0.661585	0.177042	3.73689	0.000186313	0.000908015
Bank1	443.35	-0.696031	0.182399	-3.81598	0.000135643	0.000707374
Bap1	7798.88	0.336975	0.0913349	3.68945	0.000224743	0.00105866
Barx2	364.379	-0.323241	0.213824	-1.51172	0.130605	0.18035
Basp1	28431	-0.164837	0.0992746	-1.66042	0.0968304	0.140244
Bax	1066.41	0.484572	0.130116	3.72417	0.000195959	0.000946475
Baz1a	785.807	-0.151859	0.1464	-1.03729	0.299603	0.368632
Baz1b	15167.7	-0.209188	0.105389	-1.9849	0.0471553	0.0762229
Baz2a	5071.07	-0.0353328	0.108134	-0.326749	0.743858	0.791517
Baz2b	16075.1	-0.468901	0.116484	-4.02544	5.68685e-05	0.000360585
Bbc3	196.514	1.10672	0.538508	2.05516	0.0398633	0.066197
Bbip1	3917.35	-0.286597	0.0965365	-2.96879	0.00298971	0.00811923
Bbof1	2144.35	-0.551172	0.115984	-4.75214	2.01278e-06	2.47455e-05
Bbs1	3321.79	0.323839	0.0975986	3.31808	0.000906397	0.00316178
Bbs10	484.256	-0.163714	0.0991173	-1.65172	0.0985908	0.142317
Bbs2	2736.02	-0.144664	0.0893628	-1.61884	0.105482	0.150536
Bbs4	4578.64	-0.122023	0.0704922	-1.73101	0.0834498	0.123318
Bbs5	2113.11	-0.298918	0.0795239	-3.75884	0.0001707	0.000847548
Bbs7	3084.42	-0.421513	0.136478	-3.0885	0.0020117	0.00593207
Bbs9	6868.97	-0.543899	0.112143	-4.85004	1.23435e-06	1.65697e-05
Bbx	9611.97	-0.353651	0.103389	-3.4206	0.000624835	0.00234273
BC003965	1664.17	0.423115	0.148007	2.85875	0.00425314	0.0107022
BC031181	4688.87	0.230187	0.110631	2.08067	0.0374644	0.0628726
Bcam	779.189	1.00689	0.226584	4.4438	8.83833e-06	8.2785e-05
Bcan	8754.43	0.693858	0.303148	2.28884	0.0220886	0.0405808
Bcap29	2670.29	-0.366877	0.110372	-3.32399	0.000887394	0.00310623
Bcap31	3087.86	0.262263	0.0927241	2.82842	0.00467779	0.0115251
Bcar1	3281.8	0.373029	0.14852	2.51164	0.0120173	0.0245687
Bcar3	1699.76	0.026044	0.0648394	0.40167	0.687927	0.741784
Bcas1	8607.59	-0.276449	0.141023	-1.96031	0.0499592	0.0799866
Bcas2	4160.39	-0.435643	0.190611	-2.28551	0.0222831	0.0408628
Bcas3	14994.5	-0.316033	0.146699	-2.15429	0.0312172	0.0539687
Bcat1	6154.27	0.285634	0.0954285	2.99317	0.00276096	0.0076324
Bcat2	718.097	0.439216	0.109139	4.02438	5.71268e-05	0.000361983
Bccip	2373.67	0.242758	0.103193	2.35247	0.0186493	0.0351854
Bcdin3d	309.581	0.0871264	0.120181	0.724962	0.468475	0.540298
Bche	793.673	-0.17289	0.211132	-0.818872	0.412859	0.48448
Bckdha	2174.88	0.616812	0.234609	2.6291	0.00856102	0.0186794
Bckdhb	5427.04	-0.379802	0.0915639	-4.14794	3.35473e-05	0.000237991
Bckdk	2355.44	0.156307	0.120571	1.29638	0.194843	0.25423
Bcl10	807.852	0.258804	0.108595	2.38321	0.0171626	0.0328882
Bcl11a	10826.4	-0.196529	0.141264	-1.39122	0.164159	0.219455
Bcl11b	11024	0.257529	0.132147	1.94881	0.0513179	0.0817992
Bcl2	5061.68	-0.202814	0.10799	-1.87809	0.0603688	0.0936547
Bcl2l1	6482.4	0.344333	0.132302	2.60263	0.00925125	0.0198695
Bcl2l11	339.974	0.46643	0.155053	3.00819	0.00262808	0.00732448
Bcl2l13	3759.03	0.10927	0.0549935	1.98695	0.0469275	0.0759485
Bcl6	1814.35	0.292528	0.124989	2.34043	0.0192618	0.0361881
Bcl7a	4744.43	0.282716	0.114827	2.4621	0.0138126	0.0274936
Bcl7b	2525.03	0.283679	0.119079	2.38228	0.0172059	0.0329602
Bcl7c	756.152	0.202764	0.102352	1.98104	0.0475872	0.0767486
Bcl9	2815.92	-0.0586223	0.138784	-0.422399	0.672734	0.728341
Bcl9l	1753.44	0.717783	0.250841	2.8615	0.00421641	0.0106284
Bclaf1	26235.1	-0.670583	0.157455	-4.2589	2.05438e-05	0.000161581
Bco2	285.247	0.0711766	0.101666	0.700104	0.483862	0.554833
Bcor	3800.12	0.131633	0.070417	1.86933	0.0615766	0.0953117
Bcorl1	2260.35	-0.287502	0.126037	-2.28108	0.0225437	0.0412415
Bcr	12185.2	0.430851	0.144442	2.98286	0.00285566	0.00783518
Bcs1l	1135.05	0.033208	0.109517	0.303223	0.76172	0.806154
Bdh1	3245.65	0.301427	0.0949254	3.17541	0.00149627	0.00469655
Bdnf	3082.55	-0.0823165	0.125292	-0.656995	0.511184	0.580925
Bdp1	10964.2	-0.644952	0.158925	-4.05822	4.94473e-05	0.000321879
Bean1	947.687	-0.297184	0.126003	-2.35856	0.0183461	0.0347094
Becn1	7164.27	0.2911	0.0886195	3.28482	0.00102046	0.00345505
Begain	4410.73	0.62932	0.184582	3.40944	0.000650969	0.00241927
Bend3	599.642	0.0721764	0.115343	0.625757	0.531474	0.600446
Bend4	1167.5	0.055216	0.0890552	0.62002	0.535245	0.603796
Bend6	12077.8	-0.482156	0.109697	-4.39533	1.10603e-05	9.83353e-05
Bend7	522.857	-0.261075	0.153305	-1.70298	0.088571	0.129732
Bet1	1565.41	-0.259861	0.12389	-2.09752	0.0359479	0.0607638
Bex1	2554.02	0.795109	0.18252	4.35629	1.32287e-05	0.000113637
Bex2	15295.8	0.246763	0.139044	1.77471	0.0759454	0.113775
Bex4	810.883	0.331963	0.170803	1.94354	0.0519509	0.0826543
Bfar	3280.77	0.0121437	0.0557893	0.217672	0.827685	0.862426
Bfsp2	266.015	0.399544	0.160964	2.4822	0.0130574	0.0263017
Bgn	512.681	0.640687	0.302463	2.11823	0.0341554	0.0581939
Bhlhb9	5963.91	-0.0426453	0.0870604	-0.489836	0.62425	0.685241
Bhlhe22	1718.97	-0.043489	0.155796	-0.279141	0.780137	0.822486
Bhlhe40	5670.19	0.141733	0.108421	1.30725	0.191127	0.250087
Bhlhe41	2757.7	-0.227004	0.184717	-1.22893	0.219097	0.281342
Bicc1	1859.1	-0.0378592	0.156139	-0.242471	0.808415	0.845624
Bicd1	21751.3	-0.78683	0.134157	-5.86499	4.4915e-09	1.80133e-07
Bicd2	5927.52	0.235799	0.0570061	4.13638	3.52823e-05	0.000246785
Bicdl1	8239.99	-0.139162	0.152401	-0.913126	0.361176	0.432131
Bicral	4379.56	-0.0562547	0.0953201	-0.590166	0.555079	0.621747
Bid	676.628	0.00186035	0.0901014	0.0206473	0.983527	0.986726
Bin1	14820.3	0.348909	0.115712	3.01532	0.00256705	0.00718531
Bin2	259.685	0.10788	0.126377	0.853633	0.393308	0.464483
Bin3	1891.5	-0.110118	0.103137	-1.06769	0.285662	0.353874
Birc2	4304.1	-0.0609051	0.085378	-0.713358	0.475624	0.547276
Birc3	278.478	-0.0410872	0.153533	-0.267612	0.788998	0.830207
Birc6	35149.8	-0.417011	0.0738852	-5.64404	1.66101e-08	5.14857e-07
Bivm	2286.74	-0.359614	0.10185	-3.53082	0.000414277	0.00171018
Blcap	4338.53	0.538034	0.139985	3.8435	0.000121291	0.000648161
Blm	922.117	-0.633751	0.143073	-4.42955	9.44294e-06	8.71873e-05
Blmh	5034.73	-0.130271	0.0710334	-1.83394	0.0666634	0.102257
Blnk	954.509	-0.0297522	0.098997	-0.300537	0.763768	0.807968
Bloc1s1	760.047	0.765693	0.209039	3.66292	0.000249359	0.00114995
Bloc1s2	1266.93	0.573755	0.12341	4.64919	3.3324e-06	3.76028e-05
Bloc1s3	451.694	0.600158	0.192097	3.12425	0.00178262	0.00538113
Bloc1s4	374.341	0.40201	0.176316	2.28005	0.0226046	0.0413295
Bloc1s5	1064.69	-0.0374849	0.121193	-0.3093	0.757094	0.802503
Bloc1s6	1895.88	-0.0817574	0.10068	-0.81205	0.416763	0.488486
Blvra	1049.41	0.179689	0.150834	1.19131	0.233533	0.297403
Blvrb	471.641	0.628486	0.155679	4.03707	5.41235e-05	0.000346059
Blzf1	2182.91	-0.523741	0.15393	-3.40246	0.000667814	0.00247309
Bmf	273.075	0.598311	0.159851	3.74293	0.000181886	0.000891805
Bmi1	4227.62	-0.407253	0.134951	-3.01778	0.00254637	0.00714439
Bmp1	2942.04	0.0328023	0.118436	0.276963	0.781808	0.824048
Bmp2	256.078	0.0964359	0.179792	0.536373	0.591701	0.655567
Bmp2k	3848.42	-0.254287	0.094337	-2.69552	0.00702792	0.0159216
Bmp3	2763.92	-0.676379	0.166218	-4.06922	4.71709e-05	0.000310021
Bmp4	193.956	0.650573	0.256957	2.53183	0.0113468	0.0234204
Bmp5	271.84	-0.197219	0.329138	-0.599199	0.54904	0.616314
Bmp6	999.953	1.0357	0.205464	5.04077	4.63673e-07	7.62236e-06
Bmp7	673.938	0.763743	0.188125	4.05977	4.91208e-05	0.000320237
Bmper	2330.44	-0.517138	0.106262	-4.86663	1.13519e-06	1.55611e-05
Bmpr1a	8693.59	-0.445962	0.129926	-3.43242	0.000598223	0.00226193
Bmpr1b	7751.36	-0.549469	0.136343	-4.03005	5.57652e-05	0.00035463
Bmpr2	33210.9	-0.811265	0.157258	-5.15883	2.48503e-07	4.59873e-06
Bms1	4447.54	-0.37958	0.157142	-2.41552	0.0157128	0.0305851
Bmx	149.325	-0.305173	0.173967	-1.7542	0.0793965	0.11811
Bmyc	685.006	1.46053	0.369851	3.94897	7.84894e-05	0.000464058
Bnc2	1089.64	0.573053	0.432575	1.32475	0.185255	0.243461
Bnip1	1186.25	0.141637	0.0962129	1.47212	0.140989	0.192757
Bnip2	3619.13	-0.524757	0.175219	-2.99486	0.00274574	0.00759682
Bnip3	7814.55	-0.297843	0.110373	-2.69852	0.00696477	0.01582
Bnip3l	9496.46	-0.214383	0.102347	-2.09466	0.0362009	0.0611324
Boc	2901.72	-0.145992	0.0968711	-1.50707	0.131792	0.181756
Bod1	3093.77	0.311739	0.124205	2.50987	0.0120774	0.0246612
Bod1l	16035.5	-0.598979	0.208795	-2.86874	0.00412114	0.010435
Bok	1782.26	0.962493	0.505356	1.90459	0.0568339	0.08897
Bola1	496.343	0.965962	0.397052	2.43283	0.0149812	0.0293684
Bola2	1752.33	0.488641	0.197272	2.47699	0.0132494	0.026585
Bola3	1071.6	0.0773449	0.0930756	0.83099	0.405979	0.477445
Bop1	3043.35	0.624459	0.214252	2.91461	0.00356138	0.00931626
Bora	518.071	-0.525011	0.108509	-4.83839	1.30893e-06	1.73728e-05
Borcs5	2531.5	-0.0242599	0.13447	-0.180411	0.85683	0.88547
Borcs6	948.127	0.909673	0.399528	2.27687	0.0227941	0.0416055
Borcs7	1121.74	-0.263488	0.136325	-1.9328	0.0532614	0.0843354
Bpgm	3480.31	0.0200742	0.0907287	0.221256	0.824893	0.860221
Bphl	2075.2	0.0246343	0.0781184	0.315346	0.752499	0.798744
Bpnt1	5282	0.0124332	0.0693926	0.179173	0.857802	0.886193
Bptf	15943.3	-0.287676	0.131669	-2.18484	0.0289005	0.0506531
Braf	27182.6	-0.542027	0.109803	-4.93633	7.96049e-07	1.17986e-05
Brap	5521.5	0.133773	0.0541795	2.46907	0.0135466	0.0270557
Brat1	1337.22	0.528178	0.265356	1.99045	0.0465417	0.0754683
Brca1	198.23	0.0914534	0.161908	0.564846	0.572178	0.637262
Brca2	1205.77	-0.800317	0.17326	-4.61916	3.85293e-06	4.21901e-05
Brcc3	4086.53	-0.706975	0.142905	-4.94718	7.52956e-07	1.12761e-05
Brd1	6311.95	0.132096	0.103992	1.27025	0.203995	0.264413
Brd2	9880.04	0.0405205	0.117242	0.345614	0.729633	0.778812
Brd3	3533.74	0.203353	0.086261	2.35742	0.0184026	0.0348062
Brd4	8476.07	-0.26388	0.106192	-2.48493	0.0129578	0.0261334
Brd7	4753.16	-0.540649	0.195789	-2.76139	0.00575565	0.0135586
Brd8	6509.75	-0.210256	0.0963918	-2.18127	0.0291637	0.0510108
Brd9	6845.03	-0.277456	0.121036	-2.29235	0.0218852	0.040276
Brdt	2407.87	-0.527253	0.119949	-4.39564	1.10448e-05	9.82657e-05
Bre	8552.17	-0.605193	0.131777	-4.59256	4.37842e-06	4.69521e-05
Brf1	2864.71	0.372241	0.125132	2.97479	0.00293192	0.0079958
Brf2	769.966	0.48648	0.165558	2.93843	0.00329877	0.008773
Bri3	1225.37	0.299353	0.142609	2.09912	0.0358066	0.0605376
Bri3bp	10096.6	0.171565	0.124799	1.37473	0.169215	0.225145
Brinp1	58359.5	-0.812287	0.110588	-7.34514	2.05541e-13	4.51283e-11
Brinp2	14584.3	-0.115135	0.0957674	-1.20223	0.229273	0.292611
Brinp3	34503.5	-1.12485	0.172691	-6.51362	7.33595e-11	6.72014e-09
Brix1	1386.91	-0.313251	0.167553	-1.86956	0.0615446	0.0952849
Brk1	7666.26	0.319969	0.19353	1.65333	0.0982629	0.141954
Brms1	1169.01	0.589532	0.124016	4.75366	1.9977e-06	2.46225e-05
Brms1l	4892.82	0.0237508	0.0598242	0.397009	0.691361	0.744772
Brox	6323.6	-0.222306	0.0570632	-3.89578	9.78828e-05	0.000548194
Brpf1	2730.6	0.00836701	0.0827747	0.101082	0.919486	0.937211
Brpf3	2377.25	0.0997712	0.0913744	1.09189	0.27488	0.34245
Brsk1	13595.7	0.399202	0.134832	2.96074	0.00306899	0.0082928
Brsk2	13088	0.180625	0.118771	1.52078	0.128314	0.177622
Brwd1	21648.5	-0.163405	0.0786763	-2.07693	0.0378081	0.0633346
Brwd3	4079.16	-0.729475	0.138052	-5.28405	1.26355e-07	2.73076e-06
Bscl2	4415.2	0.3268	0.121599	2.68752	0.00719842	0.0162482
Bsdc1	3749.38	-0.0585912	0.0641448	-0.913421	0.361021	0.431985
Bsg	21478	0.548707	0.169956	3.22852	0.00124431	0.00406526
Bsn	36774.1	0.299595	0.154805	1.9353	0.0529539	0.0839512
Btaf1	15646.4	-0.118253	0.125817	-0.939883	0.347278	0.418672
Btbd1	12007.1	-0.438194	0.14245	-3.07613	0.00209709	0.00612255
Btbd10	13512.4	-0.359608	0.103398	-3.47791	0.000505346	0.00199216
Btbd11	2886.34	-0.0830291	0.136493	-0.608302	0.542987	0.611002
Btbd17	656.466	1.1175	0.215724	5.18023	2.21615e-07	4.16662e-06
Btbd19	359.003	0.409869	0.140735	2.91235	0.00358721	0.00936682
Btbd2	3110.96	0.584351	0.214156	2.72863	0.00635988	0.0146777
Btbd3	13714.9	-0.0504316	0.0963031	-0.523676	0.600504	0.663675
Btbd6	2377.02	0.345399	0.16927	2.04052	0.0412987	0.0681942
Btbd7	6936.57	-0.355408	0.0879362	-4.04165	5.30759e-05	0.000341044
Btbd8	11640.4	-0.619404	0.164862	-3.7571	0.000171891	0.0008515
Btbd9	18615.6	-0.230075	0.156922	-1.46617	0.142601	0.194653
Btd	622.967	0.266314	0.0967318	2.75312	0.00590299	0.0138377
Btf3	4806.6	0.0599608	0.144915	0.413766	0.679045	0.734069
Btf3l4	4536.4	-0.465708	0.115734	-4.02394	5.72318e-05	0.000362179
Btg1	1400.78	0.356368	0.141658	2.5157	0.0118796	0.0243264
Btg2	665.367	0.620132	0.149124	4.1585	3.20346e-05	0.000229142
Btg3	837.027	-0.449357	0.169869	-2.64532	0.00816139	0.0179633
Btla	161.672	-0.290959	0.167296	-1.73919	0.082001	0.12151
Btrc	12714.2	-0.128692	0.0839817	-1.53238	0.12543	0.174168
Bub1b	202.732	0.20988	0.261786	0.801725	0.422712	0.49434
Bub3	4018.51	0.279942	0.12254	2.28449	0.0223426	0.0409371
Bud13	779.864	-0.111703	0.155166	-0.719892	0.471592	0.543408
Bud31	2528.21	-0.12942	0.0861873	-1.50162	0.133196	0.183361
Bves	131.547	0.0336251	0.171394	0.196186	0.844465	0.875626
Bysl	1681.05	0.386248	0.0936523	4.12427	3.71906e-05	0.000256806
Bzrap1	16933.9	0.252753	0.220983	1.14377	0.25272	0.318271
Bzw1	15391.1	-0.245223	0.100987	-2.42826	0.0151715	0.0296921
Bzw2	4422.28	-0.162403	0.0665044	-2.44198	0.0146068	0.0287914
C1d	2879.29	0.100675	0.151152	0.666051	0.505379	0.575532
C1galt1	3192.38	-0.451668	0.118441	-3.81345	0.000137043	0.00071324
C1galt1c1	1612.47	-0.142754	0.107857	-1.32354	0.185655	0.243814
C1qa	1977.97	0.395776	0.19445	2.03536	0.0418143	0.0689577
C1qb	2086.58	0.175095	0.137204	1.27616	0.201898	0.262221
C1qbp	1769.61	-0.159953	0.163559	-0.977952	0.328098	0.398293
C1qc	1791.76	0.75156	0.257326	2.92066	0.00349296	0.00918238
C1ql1	286.303	0.506291	0.206161	2.4558	0.0140571	0.0278817
C1ql3	6235.82	-0.131076	0.107614	-1.21802	0.223215	0.286036
C1qtnf1	132.385	0.845887	0.18496	4.57336	4.79975e-06	5.04675e-05
C1qtnf4	4541.26	1.12809	0.369857	3.05008	0.00228778	0.00656921
C1qtnf7	259.961	0.0393614	0.224473	0.17535	0.860805	0.888727
C1ra	231.9	-0.220275	0.17194	-1.28112	0.200152	0.260161
C2cd2	1482.99	-0.288803	0.0850811	-3.39445	0.000687671	0.00252855
C2cd2l	8189.7	0.303055	0.121056	2.50344	0.0122994	0.025045
C2cd3	3995.02	-0.0558999	0.106163	-0.526548	0.598507	0.66175
C2cd4c	612.26	0.676663	0.272573	2.4825	0.0130464	0.0262958
C2cd5	12759.6	-0.275733	0.0974363	-2.82988	0.00465659	0.0114854
C3ar1	159.6	-0.12211	0.195983	-0.623067	0.533241	0.602022
C4b	951.796	1.10848	0.232646	4.76466	1.89175e-06	2.35406e-05
C7	199.417	-1.7213	0.169528	-10.1535	3.19691e-24	2.07064e-20
CAAA01180111.1	3792.45	-0.54958	0.113467	-4.84353	1.27549e-06	1.70582e-05
Caap1	3164.38	-0.562637	0.138215	-4.07074	4.68644e-05	0.000308947
Cab39	20331.3	-0.301649	0.0765534	-3.94038	8.13521e-05	0.000476417
Cab39l	3789.62	-0.427884	0.113182	-3.7805	0.000156511	0.000791042
Cabin1	12644.3	0.115509	0.172302	0.670389	0.50261	0.572983
Cables1	3671.5	0.128046	0.159047	0.805088	0.420769	0.492513
Cables2	2076.81	-0.0158595	0.0819978	-0.193414	0.846635	0.877314
Cabp1	9593.58	0.162774	0.129949	1.2526	0.21035	0.271591
Cabp7	822.115	0.615632	0.215538	2.85626	0.0042866	0.0107614
Cacfd1	1591.41	0.424985	0.128466	3.30816	0.000939107	0.00324925
Cachd1	1812.64	-0.0348636	0.126437	-0.275738	0.782749	0.824905
Cacna1a	21743	-0.247885	0.13796	-1.79678	0.0723704	0.109366
Cacna1b	21024	-0.159484	0.154175	-1.03444	0.300932	0.369961
Cacna1c	43180.4	-0.2389	0.24217	-0.986499	0.323888	0.394254
Cacna1d	20582.7	-0.444519	0.177895	-2.49877	0.0124626	0.0253042
Cacna1e	69097.9	-0.358714	0.101723	-3.52638	0.000421275	0.00173244
Cacna1g	5241.68	0.560613	0.216891	2.58477	0.00974444	0.0207187
Cacna1h	4640.7	0.814195	0.234472	3.47246	0.000515715	0.0020238
Cacna1i	9704.5	0.42725	0.216313	1.97515	0.0482509	0.077674
Cacna2d1	70173.7	-0.789955	0.132372	-5.96771	2.40612e-09	1.09749e-07
Cacna2d2	3071.19	0.294094	0.128685	2.28537	0.0222911	0.0408717
Cacna2d3	63635.5	-0.31805	0.182151	-1.74608	0.0807974	0.119891
Cacna2d4	325.411	0.106083	0.161671	0.656165	0.511718	0.581473
Cacnb1	6661.48	0.498757	0.149089	3.34536	0.000821768	0.0029253
Cacnb2	39100	-0.417879	0.161668	-2.58479	0.00974375	0.0207187
Cacnb3	11225.5	0.21414	0.0994104	2.1541	0.031232	0.0539799
Cacnb4	52375.1	-0.645033	0.108283	-5.95692	2.57034e-09	1.14815e-07
Cacng2	7063.33	-0.247885	0.152434	-1.62618	0.103912	0.148672
Cacng3	9957.09	-0.545275	0.125498	-4.34491	1.39335e-05	0.000118435
Cacng4	2492.98	0.0858955	0.198806	0.432058	0.665699	0.722355
Cacng5	1271.2	0.552099	0.224212	2.46239	0.0138013	0.0274754
Cacng7	3619.38	0.390365	0.147591	2.64492	0.00817114	0.0179771
Cacng8	3495.47	0.318495	0.139159	2.28872	0.0220957	0.0405882
Cactin	1266.17	0.65594	0.168634	3.88972	0.000100359	0.000558443
Cacul1	7943.42	-0.259255	0.0724403	-3.57888	0.000345066	0.00147768
Cacybp	5901.32	-0.394749	0.182289	-2.16552	0.0303479	0.0527051
Cad	1128.71	0.692836	0.211423	3.27702	0.0010491	0.00353356
Cadm1	43700	-0.334277	0.121513	-2.75097	0.00594188	0.0139188
Cadm2	312320	-0.916499	0.176845	-5.1825	2.18932e-07	4.12557e-06
Cadm3	25293.2	-0.0146425	0.0934039	-0.156765	0.87543	0.901241
Cadm4	8352.36	0.927272	0.237671	3.90149	9.56031e-05	0.000538922
Cadps	84546.2	-0.591076	0.105711	-5.59144	2.252e-08	6.6001e-07
Cadps2	26524	-0.91388	0.129019	-7.0833	1.40758e-12	2.33767e-10
Cage1	820.637	-0.438737	0.106887	-4.10469	4.04858e-05	0.000275737
Calb1	9067.86	-0.260857	0.138517	-1.88321	0.0596715	0.0927173
Calb2	967.627	1.0883	0.457034	2.38122	0.0172554	0.0330417
Calcoco1	3886.78	0.0196092	0.122873	0.159589	0.873205	0.899666
Calcrl	1163.22	-0.554255	0.150725	-3.67725	0.000235759	0.00110015
Cald1	2903.98	-0.319759	0.220371	-1.45101	0.146778	0.19966
Calhm2	845.408	0.159602	0.107452	1.48533	0.137458	0.188506
Calm1	241620	0.0323467	0.121765	0.26565	0.790509	0.831324
Calm2	113566	-0.166109	0.119698	-1.38774	0.165217	0.220698
Calm3	88216.7	0.437523	0.152869	2.86208	0.00420867	0.010613
Caln1	24650.4	-0.0789087	0.10435	-0.75619	0.449535	0.521052
Calr	25840.5	0.376646	0.153401	2.4553	0.0140767	0.0279164
Calu	6713.84	-0.0406373	0.0821508	-0.494667	0.620835	0.682302
Caly	6976.25	0.614284	0.17482	3.5138	0.000441741	0.00179714
Camk1	4594.99	0.482802	0.128063	3.77003	0.000163226	0.000818625
Camk1d	28641.2	-0.371569	0.141661	-2.62295	0.00871715	0.0189657
Camk1g	2398.33	0.523188	0.106517	4.91181	9.02414e-07	1.30032e-05
Camk2a	66450.1	0.274493	0.13923	1.97151	0.0486658	0.0782446
Camk2b	47293.4	0.330342	0.111354	2.96659	0.00301124	0.00817254
Camk2d	15416.9	-0.359624	0.113925	-3.15666	0.00159587	0.00493067
Camk2g	19161	-0.0979908	0.068011	-1.44081	0.149639	0.203083
Camk2n1	72282.9	0.193749	0.140768	1.37637	0.168708	0.224664
Camk2n2	1567.03	0.711331	0.172412	4.12577	3.69498e-05	0.000255551
Camk4	57228.1	-0.802153	0.140437	-5.71182	1.11774e-08	3.72216e-07
Camkk1	7259.5	0.712961	0.170055	4.19253	2.75857e-05	0.000204431
Camkk2	18679.8	0.070945	0.141781	0.500385	0.616804	0.678787
Camkmt	6247.17	-0.553384	0.153099	-3.61454	0.000300882	0.00132302
Camkv	23381.3	0.672775	0.182617	3.68407	0.000229536	0.00107496
Caml	2707.79	0.0867164	0.101681	0.852825	0.393756	0.464843
Camsap1	11806.6	0.010073	0.071924	0.14005	0.888621	0.911625
Camsap2	29735.1	-0.449567	0.138779	-3.23944	0.00119764	0.00393933
Camsap3	1429.8	0.234013	0.099517	2.35148	0.0186987	0.0352632
Camta1	30049.8	-0.382706	0.121831	-3.14128	0.00168209	0.00513546
Camta2	8849.32	0.34203	0.113298	3.01886	0.00253729	0.00712818
Cand1	17144.5	-0.117079	0.0866365	-1.35138	0.176574	0.233426
Cand2	244.233	0.228064	0.164509	1.38633	0.165645	0.221122
Cant1	2593.68	0.58535	0.145498	4.02307	5.74442e-05	0.000363346
Canx	36599.6	-0.119426	0.110906	-1.07682	0.281559	0.349394
Cap1	17006.4	-0.0308947	0.113535	-0.272116	0.785533	0.827098
Cap2	25906.2	-0.372478	0.126217	-2.95108	0.0031666	0.00849278
Capg	102.608	0.78428	0.201114	3.89968	9.63213e-05	0.000542027
Capn1	1158.11	0.242777	0.124885	1.944	0.0518954	0.0825965
Capn10	1515.33	0.601232	0.20139	2.98541	0.00283198	0.00778884
Capn15	3201.39	0.507394	0.176516	2.87449	0.00404675	0.0102807
Capn2	4952.09	-0.0421428	0.0877334	-0.480351	0.630978	0.69052
Capn3	412.84	-0.0152065	0.097868	-0.155377	0.876524	0.902152
Capn5	2694.78	0.103611	0.0943882	1.09771	0.27233	0.339828
Capn6	339.159	-0.840999	0.199366	-4.21836	2.46084e-05	0.00018631
Capn7	5255.31	-0.328133	0.10395	-3.15664	0.00159598	0.00493067
Capns1	4566.91	0.34367	0.139545	2.4628	0.0137859	0.0274531
Caprin1	23780.7	-0.199748	0.106848	-1.86946	0.0615588	0.0952955
Caprin2	1119.45	-0.67703	0.130637	-5.18253	2.18902e-07	4.12557e-06
Capza1	3850.66	-0.290963	0.0833343	-3.49152	0.000480282	0.00192083
Capza2	18933	-0.37825	0.115229	-3.2826	0.00102856	0.00347883
Capzb	9827.59	-0.175465	0.162484	-1.07989	0.28019	0.347927
Car10	53774.2	-1.01266	0.126581	-8.0001	1.24316e-15	7.0017e-13
Car11	7781	0.478481	0.151584	3.15654	0.0015965	0.00493112
Car12	1572.05	0.394347	0.114986	3.42953	0.000604624	0.0022828
Car13	141.632	0.719756	0.383341	1.87759	0.0604379	0.0937395
Car14	406.233	0.285951	0.151383	1.88893	0.0589015	0.0916969
Car2	10398.8	-0.184532	0.0928784	-1.98682	0.0469427	0.0759551
Car4	1395.04	-0.0741222	0.11479	-0.645719	0.518461	0.588207
Car5b	340.445	-0.354237	0.133167	-2.6601	0.00781173	0.0173454
Car7	2008.35	-0.00768523	0.0808223	-0.095088	0.924245	0.940434
Car8	1036.91	-0.503302	0.123274	-4.08279	4.44981e-05	0.000296517
Card10	128.004	1.00289	0.231723	4.32799	1.50474e-05	0.00012641
Card19	328.912	0.236924	0.167716	1.41265	0.157759	0.212323
Card9	119.961	0.7723	0.300228	2.57237	0.0101004	0.0213094
Carf	3854.11	-0.493029	0.0978913	-5.03649	4.74137e-07	7.76481e-06
Carhsp1	2306.13	0.766635	0.205368	3.73299	0.000189223	0.000921158
Carkd	3007.53	0.326268	0.110424	2.95467	0.00312999	0.00842222
Carm1	3924.87	0.170679	0.0977974	1.74523	0.0809454	0.120083
Carmil3	1749.46	0.574926	0.198576	2.89525	0.00378855	0.00976147
Carnmt1	1940.23	-0.410313	0.108337	-3.78736	0.000152255	0.000774063
Carns1	474.555	0.273154	0.116628	2.3421	0.0191756	0.0360576
Cars	3936.35	0.239502	0.0849493	2.81935	0.00481211	0.0117549
Cars2	1043.76	0.474452	0.132805	3.57253	0.000353543	0.00150701
Cartpt	545.219	1.25118	0.288862	4.33142	1.48154e-05	0.000124704
Casc1	146.974	-0.293936	0.16594	-1.77134	0.076504	0.114478
Casc3	3640.1	0.174272	0.0771864	2.2578	0.0239579	0.0432725
Casc4	15252.5	-0.658811	0.126185	-5.22101	1.77949e-07	3.53009e-06
Casd1	6759.52	-0.293184	0.0918787	-3.191	0.00141783	0.0044983
Cask	22761.5	-0.615114	0.105593	-5.82532	5.70046e-09	2.15288e-07
Caskin1	5961.38	0.678566	0.171989	3.94541	7.96628e-05	0.000469709
Caskin2	1058.73	0.761733	0.274449	2.7755	0.00551166	0.0131126
Casp12	156.645	-0.73647	0.272953	-2.69816	0.00697238	0.0158313
Casp2	1354.34	-0.00226603	0.0843855	-0.0268533	0.978577	0.982825
Casp3	765.699	-0.387569	0.11792	-3.2867	0.00101367	0.00343607
Casp6	132.621	0.362111	0.195691	1.85042	0.0642528	0.0989456
Casp7	330.839	-0.227741	0.0992877	-2.29375	0.021805	0.0401851
Casp8	369.372	-0.154597	0.126955	-1.21773	0.223325	0.286119
Casp8ap2	3449.46	-0.657329	0.198342	-3.31412	0.000919314	0.00319957
Casp9	1027	0.291827	0.15072	1.93622	0.0528411	0.0838339
Casq2	278.774	-0.346254	0.118912	-2.91184	0.00359306	0.0093783
Cast	1659.3	-0.446388	0.139824	-3.1925	0.00141048	0.00448817
Casz1	203.316	0.66639	0.195173	3.41436	0.000639318	0.00238364
Cat	3630.68	-0.333421	0.14566	-2.28904	0.0220771	0.0405656
Catip	186.623	-0.255487	0.220559	-1.15836	0.246717	0.31197
Catsper2	607.693	-0.348931	0.124976	-2.79198	0.00523871	0.0125787
Catsperz	259.675	0.112749	0.162266	0.694839	0.487156	0.557968
Cav1	922.075	-0.0829779	0.0920543	-0.901402	0.367375	0.438332
Cav2	2402.41	-0.545431	0.203006	-2.68677	0.00721473	0.016268
Cbarp	10337.6	0.973219	0.260973	3.7292	0.000192088	0.00093195
Cbfa2t2	8127.95	-0.253821	0.0703291	-3.60904	0.000307328	0.00134452
Cbfa2t3	1063.29	0.727934	0.13178	5.52388	3.31599e-08	9.21788e-07
Cbfb	2451.4	-0.427443	0.119016	-3.59147	0.000328821	0.00142156
Cbl	6709.73	-0.058298	0.0988338	-0.589859	0.555285	0.621923
Cblb	5879.46	-0.543654	0.105259	-5.16492	2.40541e-07	4.46413e-06
Cbll1	2321.23	-0.56958	0.179	-3.18201	0.00146256	0.00460974
Cbln1	231.164	0.588634	0.244756	2.40498	0.0161733	0.0313167
Cbln2	2873.99	0.191881	0.140956	1.36128	0.173424	0.229966
Cbln4	739.165	0.547272	0.143643	3.80994	0.000139002	0.000719965
Cbr1	2104.35	0.436065	0.136646	3.19119	0.00141688	0.00449803
Cbr3	475.638	0.905078	0.151121	5.98911	2.10998e-09	9.82308e-08
Cbr4	1264.31	-0.199816	0.073802	-2.70746	0.00677992	0.0154761
Cbs	1166.3	0.869528	0.0880188	9.87888	5.14038e-23	2.21961e-19
Cbwd1	1894.66	-0.309766	0.118413	-2.61598	0.00889709	0.0192795
Cbx1	3149.07	0.249509	0.100208	2.48993	0.012777	0.0258493
Cbx2	186.057	0.74262	0.244125	3.04196	0.0023504	0.00670492
Cbx3	4986.47	-0.223695	0.112605	-1.98654	0.0469736	0.0759955
Cbx4	2715.45	0.415288	0.143392	2.89617	0.00377753	0.00974784
Cbx5	24516	0.0188956	0.0738016	0.256033	0.797926	0.83756
Cbx6	257.186	1.1381	0.47642	2.38885	0.0169011	0.0324928
Cbx7	2817.98	0.3998	0.137234	2.91327	0.00357669	0.00935254
Cbx8	512.105	0.783059	0.268649	2.9148	0.00355919	0.00931388
Cby1	2202.9	-0.146991	0.113759	-1.29213	0.196314	0.255943
Cc2d1a	2893.62	0.38803	0.14721	2.6359	0.00839151	0.0183963
Cc2d1b	2230.6	0.256826	0.175466	1.46368	0.14328	0.195456
Cc2d2a	5136.91	-0.469377	0.128442	-3.65438	0.000257801	0.00117929
Ccar1	8542.79	-0.602756	0.177376	-3.39819	0.00067833	0.00250059
Ccar2	5929.69	0.386662	0.148139	2.61013	0.0090509	0.0195344
Ccbe1	1823.93	-0.435335	0.18918	-2.30117	0.0213819	0.0395292
Ccbl1	795.154	0.454439	0.12662	3.589	0.000331943	0.00142952
Ccbl2	443.866	-0.0126019	0.101725	-0.123882	0.901408	0.922269
Ccdc106	1619.66	0.490863	0.184398	2.66198	0.00776836	0.0172698
Ccdc107	914.912	0.561859	0.114693	4.89882	9.6412e-07	1.36494e-05
Ccdc112	1290.67	-0.628124	0.207775	-3.02311	0.00250195	0.00704418
Ccdc113	342.36	-0.648835	0.198765	-3.26434	0.00109719	0.00366596
Ccdc114	110.722	0.64104	0.194722	3.29208	0.000994503	0.00339646
Ccdc115	1308.98	-0.0912237	0.153253	-0.595248	0.551678	0.618731
Ccdc117	1261.25	0.225512	0.10429	2.16236	0.0305906	0.0530626
Ccdc12	1990.79	0.700103	0.166019	4.21701	2.47567e-05	0.000187215
Ccdc120	597.348	0.379224	0.157664	2.40527	0.0161604	0.0313011
Ccdc122	429.311	-1.06699	0.220296	-4.84345	1.27601e-06	1.70582e-05
Ccdc124	3129.5	0.820791	0.183659	4.46911	7.8546e-06	7.52133e-05
Ccdc126	1012.89	-0.0138453	0.110216	-0.12562	0.900033	0.921087
Ccdc127	7469.11	-0.164129	0.105881	-1.55013	0.12111	0.16915
Ccdc129	291.27	-0.790662	0.16095	-4.91246	8.9942e-07	1.29745e-05
Ccdc13	423.74	0.346709	0.123743	2.80185	0.00508111	0.0122869
Ccdc130	936.696	0.0509824	0.13569	0.375728	0.707119	0.758971
Ccdc134	772.759	0.544229	0.160278	3.39552	0.000684985	0.00252082
Ccdc136	6086.94	-0.16789	0.0766534	-2.19025	0.0285058	0.0500834
Ccdc137	1326.83	0.323005	0.0695539	4.64395	3.41813e-06	3.8503e-05
Ccdc138	911.984	-0.503784	0.155632	-3.23701	0.00120788	0.00396826
Ccdc14	462.145	-0.251241	0.125095	-2.0084	0.0446003	0.072829
Ccdc141	3897.79	-0.400511	0.119392	-3.3546	0.000794811	0.00285049
Ccdc148	4737.42	-0.799805	0.148529	-5.38484	7.25102e-08	1.74916e-06
Ccdc149	4872.75	-0.0309385	0.0853259	-0.362592	0.71691	0.767698
Ccdc15	889.692	-0.609922	0.161596	-3.77437	0.000160413	0.000807928
Ccdc151	409.653	0.129916	0.131396	0.988738	0.322791	0.393177
Ccdc155	334.668	0.264868	0.166818	1.58776	0.11234	0.15887
Ccdc157	2003	0.163864	0.164448	0.996447	0.319033	0.389258
Ccdc159	644.546	0.389625	0.216038	1.8035	0.0713098	0.108066
Ccdc160	152.857	-0.661492	0.219303	-3.01633	0.00255852	0.00716917
Ccdc162	273.828	-0.0845832	0.176518	-0.479176	0.631814	0.69126
Ccdc163	187.186	0.166063	0.1233	1.34683	0.178035	0.235037
Ccdc166	343.452	0.462452	0.181153	2.55282	0.0106855	0.0223077
Ccdc167	1327.91	0.200995	0.0846582	2.37419	0.0175873	0.0335482
Ccdc17	234.08	-0.302874	0.136281	-2.22243	0.0262543	0.0468128
Ccdc171	1802.56	-0.341339	0.137042	-2.49076	0.012747	0.0258007
Ccdc173	660.874	-0.641773	0.128322	-5.00129	5.69487e-07	8.97462e-06
Ccdc174	2659.77	-0.49725	0.163389	-3.04335	0.00233956	0.00668432
Ccdc177	1389.26	0.269621	0.0985608	2.73558	0.00622705	0.0144398
Ccdc18	340.671	-0.792028	0.225445	-3.51318	0.00044277	0.00179857
Ccdc181	2164.69	-0.37265	0.195934	-1.90192	0.0571822	0.0894287
Ccdc184	1045.58	0.636504	0.235416	2.70375	0.00685622	0.0156173
Ccdc186	7686.39	-0.448142	0.174924	-2.56192	0.0104095	0.0218337
Ccdc187	1059.65	0.593885	0.276075	2.15118	0.0314622	0.0543343
Ccdc190	425.128	0.0948254	0.163106	0.581371	0.56099	0.626958
Ccdc191	1354.81	-0.433596	0.143376	-3.02419	0.00249297	0.00702348
Ccdc25	3625.29	-0.199176	0.113188	-1.75969	0.0784598	0.117027
Ccdc28a	1983.6	-0.131124	0.0665301	-1.97089	0.0487364	0.0783386
Ccdc28b	1429.16	0.53199	0.135059	3.93894	8.1842e-05	0.000477774
Ccdc3	1290.83	0.0554357	0.104762	0.529159	0.596695	0.660114
Ccdc30	3158.89	-0.322043	0.113133	-2.84658	0.00441915	0.0110236
Ccdc32	2541.34	-0.0614525	0.0803065	-0.765224	0.444138	0.515719
Ccdc34	2189.87	-0.907119	0.221044	-4.1038	4.06413e-05	0.000276652
Ccdc39	2810.01	-0.62439	0.148406	-4.20731	2.58424e-05	0.00019384
Ccdc43	1819.67	0.0539052	0.089842	0.599999	0.548507	0.615769
Ccdc47	8614.36	-0.710527	0.310507	-2.28828	0.0221211	0.0406233
Ccdc50	8145.61	-0.503015	0.109833	-4.57982	4.65378e-06	4.90521e-05
Ccdc51	473.72	0.499617	0.144106	3.46701	0.000526288	0.00205595
Ccdc57	1935.18	-0.0674993	0.148947	-0.453175	0.650423	0.708534
Ccdc58	1403.29	-0.285444	0.0927149	-3.07873	0.00207884	0.00607748
Ccdc59	1979.69	-0.268425	0.15806	-1.69825	0.0894604	0.13083
Ccdc6	4123.59	0.107223	0.10241	1.047	0.295098	0.364136
Ccdc61	524.101	0.87568	0.230889	3.79265	0.000149051	0.000759737
Ccdc62	425.431	-0.383853	0.160227	-2.39568	0.0165895	0.0319936
Ccdc65	575.386	-0.282036	0.13015	-2.16701	0.0302344	0.0525291
Ccdc66	3437.65	-0.696744	0.207008	-3.36578	0.000763272	0.00275877
Ccdc71	1621.05	0.423422	0.123712	3.42265	0.000620132	0.00233034
Ccdc71l	1374.31	-0.154363	0.118194	-1.30601	0.191549	0.250537
Ccdc74a	801.041	0.366808	0.159768	2.29588	0.021683	0.0399945
Ccdc77	782.185	-0.247863	0.115253	-2.1506	0.0315081	0.0543773
Ccdc79	600.027	-0.555866	0.131827	-4.21663	2.47979e-05	0.000187417
Ccdc8	130.402	0.854685	0.245516	3.48118	0.000499212	0.00197459
Ccdc80	864.514	-0.352365	0.15882	-2.21864	0.0265111	0.0471608
Ccdc82	3458.43	-0.5235	0.128193	-4.08369	4.43265e-05	0.000295525
Ccdc84	687.236	0.143912	0.104326	1.37945	0.167756	0.223526
Ccdc85a	17640.2	-0.559498	0.109252	-5.12115	3.03677e-07	5.40362e-06
Ccdc85b	680.871	2.02546	0.926329	2.18655	0.0287757	0.050448
Ccdc85c	3855.46	0.719439	0.199966	3.59781	0.000320908	0.00139265
Ccdc86	478.67	0.162419	0.112947	1.43801	0.150431	0.20405
Ccdc87	173.936	-0.257059	0.183458	-1.40119	0.161158	0.216089
Ccdc88a	28406.8	-0.941311	0.177847	-5.29281	1.20449e-07	2.63563e-06
Ccdc88b	143.452	0.84641	0.298344	2.83703	0.00455356	0.0112878
Ccdc88c	4491.34	0.293077	0.140616	2.08424	0.0371386	0.0624067
Ccdc9	2085.52	0.515037	0.125941	4.0895	4.323e-05	0.00029086
Ccdc90b	1729.59	-0.589597	0.162347	-3.63171	0.000281554	0.00125897
Ccdc91	4923.72	-0.154484	0.0855557	-1.80566	0.070972	0.107705
Ccdc92	3949.25	0.255932	0.0917453	2.78959	0.00527747	0.012653
Ccdc92b	2218.4	0.175893	0.0716468	2.45499	0.0140887	0.0279358
Ccdc93	3644.16	-0.0526401	0.0831404	-0.633147	0.526638	0.596126
Ccdc94	509.093	0.429314	0.144149	2.97826	0.00289887	0.00793072
Ccdc96	146.822	-0.034852	0.203546	-0.171224	0.864048	0.891436
Ccdc97	1560.09	0.803	0.159926	5.02107	5.13853e-07	8.25862e-06
Cchcr1	289.105	0.288204	0.191352	1.50614	0.132031	0.182027
Cck	13992.9	0.305784	0.220517	1.38667	0.165542	0.221008
Cckbr	3653.13	-0.236621	0.129671	-1.82477	0.0680354	0.103955
Ccl25	1753.66	-0.185125	0.122545	-1.51067	0.130872	0.180603
Ccl27a	6161.18	-0.0631746	0.126029	-0.501271	0.616181	0.678338
Ccl28	327.708	-0.516994	0.259878	-1.98937	0.0466606	0.0756119
Ccm2	3140.95	0.551576	0.166656	3.30967	0.000934052	0.00323695
Ccm2l	220.727	0.172947	0.129707	1.33337	0.182411	0.240155
Ccnb1	273.463	1.07109	0.339507	3.15484	0.00160584	0.00495286
Ccnb1ip1	1248.44	1.55802	1.02917	1.51385	0.130063	0.179677
Ccnc	5090.76	-0.669859	0.151101	-4.43319	9.28474e-06	8.61565e-05
Ccnd1	2705.6	0.639238	0.0865348	7.38706	1.50106e-13	3.66882e-11
Ccnd2	3563.97	0.330166	0.144104	2.29117	0.0219537	0.0403731
Ccnd3	989.208	0.960985	0.180144	5.33455	9.57828e-08	2.20386e-06
Ccndbp1	2832.9	0.115574	0.0939962	1.22957	0.21886	0.281066
Ccne1	946.56	0.203661	0.108437	1.87815	0.0603605	0.0936531
Ccne2	881.32	-0.571423	0.143639	-3.97818	6.94458e-05	0.000423143
Ccnf	308.871	0.467385	0.0949979	4.91995	8.65661e-07	1.26424e-05
Ccng1	9221.07	-0.489067	0.160326	-3.05045	0.00228502	0.00656468
Ccng2	2887.03	0.0777854	0.121364	0.640924	0.521572	0.59127
Ccnh	6400.78	-0.48651	0.136348	-3.56814	0.000359527	0.00152499
Ccni	12567.1	-0.154822	0.0800325	-1.93449	0.0530526	0.0840562
Ccnj	714.764	0.0455415	0.089312	0.509915	0.610111	0.672914
Ccnjl	409.207	0.207698	0.109722	1.89294	0.0583656	0.0909938
Ccnk	1611.2	0.0171557	0.0822227	0.208649	0.834722	0.867791
Ccnl1	4028.84	-0.22461	0.117551	-1.91074	0.0560374	0.0879569
Ccnl2	4568.37	0.19447	0.12751	1.52514	0.127225	0.176321
Ccnt1	5060.31	-0.0784182	0.0573885	-1.36645	0.171799	0.228185
Ccnt2	9846.73	-0.198034	0.0764263	-2.59117	0.00956495	0.0204227
Ccny	20750.4	-0.347498	0.0701614	-4.95284	7.31366e-07	1.09781e-05
Ccnyl1	3593.5	-0.472369	0.104457	-4.52212	6.12221e-06	6.14784e-05
Ccp110	6628.4	-0.211364	0.109515	-1.93	0.0536074	0.0847692
Ccpg1os	552.624	-0.231942	0.21315	-1.08817	0.276522	0.344107
Ccr5	258.521	-0.122199	0.148746	-0.821526	0.411347	0.48288
Ccs	1525.82	0.266385	0.0907635	2.93493	0.00333624	0.00885245
Ccsap	4210.94	0.153455	0.0863803	1.7765	0.0756507	0.11341
Ccser1	78152	-0.860119	0.139365	-6.17169	6.7564e-10	3.85019e-08
Ccser2	15543.6	-0.360562	0.0932678	-3.86587	0.000110692	0.000600966
Cct2	9992.55	-0.204627	0.131097	-1.56089	0.11855	0.166164
Cct3	7453.59	0.253083	0.0999098	2.53311	0.0113055	0.0233425
Cct4	6416.7	0.304145	0.122522	2.48237	0.0130511	0.026297
Cct5	10842.2	0.211193	0.108452	1.94734	0.0514945	0.0820492
Cct7	10585.6	0.473553	0.115921	4.08514	4.40506e-05	0.00029414
Cct8	12062.7	0.0777411	0.0849851	0.914761	0.360317	0.431205
Ccz1	2834.51	0.0280581	0.113103	0.248076	0.804075	0.842105
Cd109	101.317	0.70473	0.311828	2.26	0.0238215	0.0430923
Cd151	1226.72	0.593695	0.155124	3.82722	0.000129601	0.000681904
Cd163	137.653	0.881239	0.366781	2.40263	0.0162775	0.0314996
Cd164	4558.75	-0.0683151	0.100573	-0.679256	0.496976	0.567659
Cd164l2	260.553	0.567588	0.180632	3.14223	0.00167664	0.00512244
Cd180	197.708	-1.08344	0.180152	-6.01404	1.80953e-09	8.70654e-08
Cd200	6061.41	-0.174122	0.119168	-1.46115	0.143974	0.196258
Cd200r1	127.63	-0.528988	0.172106	-3.07362	0.00211475	0.00616439
Cd248	174.799	0.336251	0.20847	1.61295	0.106756	0.152187
Cd24a	459.187	-0.0264875	0.243977	-0.108565	0.913547	0.932259
Cd276	883.722	0.191183	0.122528	1.56032	0.118685	0.166282
Cd2ap	7885.85	-0.729395	0.146873	-4.96616	6.82912e-07	1.04568e-05
Cd2bp2	4833	0.361727	0.11852	3.05203	0.00227298	0.00654461
Cd300d	200.192	0.454091	0.152235	2.98283	0.00285601	0.00783518
Cd302	943.301	0.0689809	0.137938	0.500088	0.617013	0.678908
Cd320	970.587	0.240014	0.150994	1.58955	0.111935	0.158419
Cd33	419.793	-0.329578	0.169524	-1.94414	0.0518785	0.0825798
Cd34	5154.5	-0.52241	0.112721	-4.63454	3.57724e-06	3.98448e-05
Cd38	272.718	-0.209581	0.205374	-1.02049	0.307498	0.376817
Cd3eap	1414.23	-0.169045	0.181915	-0.929257	0.352756	0.423975
Cd4	521.209	0.162685	0.266031	0.611526	0.540851	0.609181
Cd44	255.503	-0.0471824	0.215933	-0.218505	0.827035	0.861969
Cd46	4468	-1.03142	0.17673	-5.83615	5.34216e-09	2.04741e-07
Cd47	9897.22	-0.134048	0.111614	-1.201	0.229751	0.293164
Cd53	530.303	-0.248926	0.132586	-1.87747	0.060454	0.0937532
Cd55	725.439	-0.307001	0.185731	-1.65293	0.0983442	0.142039
Cd59a	313.656	-0.0750002	0.23426	-0.320157	0.748849	0.795652
Cd6	195.362	-0.301929	0.217491	-1.38824	0.165064	0.220574
Cd63	1044.46	0.45257	0.171791	2.63443	0.00842793	0.0184605
Cd68	448.447	0.0860536	0.141022	0.610215	0.541719	0.609946
Cd74	250.279	1.23995	0.347228	3.57099	0.000355629	0.00151242
Cd81	16073.8	0.450078	0.120942	3.72143	0.000198095	0.000955013
Cd82	791.345	0.49537	0.135411	3.65826	0.000253929	0.00116645
Cd83	879.407	0.228241	0.128123	1.78142	0.0748436	0.112461
Cd84	402.721	-0.533742	0.156492	-3.41068	0.000648019	0.00240942
Cd86	203.522	-0.260442	0.136205	-1.91213	0.0558596	0.087731
Cd9	2038.59	-0.139841	0.151564	-0.922655	0.356187	0.427227
Cd93	672.969	-0.122692	0.11961	-1.02577	0.305002	0.374254
Cd99l2	7136.22	0.0921689	0.0926706	0.994586	0.319938	0.390068
Cda	143.881	0.017414	0.19578	0.0889467	0.929124	0.944122
Cdadc1	4323.28	-0.122356	0.150755	-0.811622	0.417009	0.48873
Cdan1	1759.88	0.1469	0.134999	1.08815	0.276528	0.344107
Cdc123	5893.67	-0.26619	0.0902912	-2.94813	0.00319704	0.00855493
Cdc14a	590.508	-0.288603	0.179245	-1.61011	0.107375	0.152951
Cdc14b	2286	-0.210329	0.0979301	-2.14775	0.0317336	0.0546863
Cdc16	4473.51	-0.100657	0.103432	-0.973176	0.330466	0.400529
Cdc23	3694.62	0.0646986	0.0417813	1.5485	0.121501	0.169586
Cdc25a	393.544	0.186745	0.134731	1.38606	0.16573	0.221188
Cdc25b	665.052	0.1698	0.160096	1.06061	0.288866	0.357194
Cdc26	1549.92	-0.190631	0.106874	-1.7837	0.0744718	0.112019
Cdc27	11641.9	-0.57029	0.104723	-5.4457	5.16026e-08	1.32631e-06
Cdc34	1919.58	0.61395	0.172086	3.5677	0.000360123	0.00152701
Cdc37	4270.04	0.645951	0.114168	5.65789	1.53246e-08	4.80664e-07
Cdc37l1	14538.4	-0.312233	0.0952373	-3.27847	0.00104372	0.00351726
Cdc40	5618.45	-0.411955	0.0981531	-4.19706	2.704e-05	0.000201424
Cdc42	22223.8	-0.13285	0.0752916	-1.76447	0.0776525	0.115995
Cdc42bpa	52458.9	-0.595885	0.12793	-4.6579	3.19451e-06	3.62997e-05
Cdc42bpb	13098.1	0.147875	0.08199	1.80357	0.0712987	0.108062
Cdc42bpg	198.727	0.917076	0.2103	4.3608	1.29588e-05	0.000111912
Cdc42ep1	934.761	0.476554	0.186827	2.55077	0.0107484	0.022421
Cdc42ep2	634.02	0.304357	0.195822	1.55425	0.120124	0.168026
Cdc42ep3	1492.22	-0.0218549	0.105476	-0.207202	0.835852	0.868642
Cdc42ep4	1831.39	0.707995	0.184273	3.8421	0.000121987	0.000650563
Cdc42se1	2900.74	0.291036	0.106449	2.73404	0.00625615	0.0144899
Cdc42se2	12109.1	-0.00997916	0.136241	-0.0732464	0.94161	0.953758
Cdc45	130.358	0.172787	0.17809	0.970222	0.331936	0.402048
Cdc5l	5766.11	-0.0588874	0.0819029	-0.71899	0.472147	0.543903
Cdc7	1393.11	-0.144037	0.110268	-1.30624	0.19147	0.250459
Cdc73	9286.41	-0.601702	0.132734	-4.53316	5.81086e-06	5.88077e-05
Cdca4	625.845	0.0422592	0.0768066	0.550203	0.58218	0.646844
Cdca7	225.752	0.435006	0.209869	2.07275	0.0381953	0.0638593
Cdh1	151.062	1.3954	0.736188	1.89544	0.0580337	0.0905963
Cdh10	28174.2	-0.895055	0.136403	-6.56186	5.31394e-11	5.33618e-09
Cdh11	27758.1	-0.691746	0.123517	-5.60043	2.13823e-08	6.35289e-07
Cdh12	39819.9	-1.23655	0.140696	-8.78878	1.5119e-18	1.95852e-15
Cdh13	16607.6	-0.273426	0.140228	-1.94987	0.0511916	0.0816569
Cdh18	44786.2	-1.00504	0.12807	-7.84757	4.24174e-15	1.89474e-12
Cdh19	2130.63	-0.513145	0.180702	-2.83973	0.00451515	0.0112199
Cdh2	28370.7	-0.504	0.102454	-4.9193	8.68554e-07	1.26703e-05
Cdh20	10326.7	-0.757957	0.136058	-5.57084	2.53511e-08	7.29773e-07
Cdh22	3036.01	0.716514	0.147339	4.86305	1.15593e-06	1.57449e-05
Cdh23	206.227	0.503202	0.221908	2.26762	0.0233526	0.0423801
Cdh24	545.778	0.450871	0.12275	3.67307	0.000239656	0.00111512
Cdh4	5147.72	0.22486	0.210265	1.06941	0.284884	0.353046
Cdh5	1032.79	0.0628985	0.185376	0.339303	0.734382	0.782785
Cdh6	6303.04	-0.846801	0.118594	-7.14033	9.31101e-13	1.6082e-10
Cdh7	6272.16	-0.599636	0.147402	-4.06804	4.74111e-05	0.000311127
Cdh8	20763	-0.858249	0.162168	-5.29234	1.20761e-07	2.63801e-06
Cdh9	10071.2	-1.03759	0.158594	-6.54245	6.05187e-11	5.85044e-09
Cdhr1	639.043	0.135898	0.243301	0.55856	0.576462	0.641427
Cdhr3	135.754	-0.162411	0.156952	-1.03478	0.300772	0.369903
Cdip1	12247.3	0.223754	0.147787	1.51403	0.130019	0.179655
Cdipt	5306.39	0.457172	0.165805	2.7573	0.00582817	0.0136967
Cdk11b	4270.23	-0.429647	0.286734	-1.49842	0.134024	0.184285
Cdk12	9484.26	-0.583481	0.10833	-5.38612	7.19952e-08	1.74322e-06
Cdk13	16839.7	-0.663203	0.142088	-4.66753	3.04836e-06	3.49764e-05
Cdk14	35237.3	-0.490104	0.0966662	-5.07007	3.97677e-07	6.69026e-06
Cdk16	11917.9	-0.0307854	0.0932767	-0.330044	0.741367	0.789256
Cdk17	32016.1	-0.37436	0.0915443	-4.08939	4.32512e-05	0.00029086
Cdk18	1534.83	0.13777	0.160122	0.860406	0.389565	0.461114
Cdk19	9928.37	-0.247278	0.0677059	-3.65223	0.000259971	0.00118675
Cdk2	100.906	0.283826	0.182502	1.5552	0.119899	0.167742
Cdk20	427.168	0.788658	0.264682	2.97965	0.00288581	0.00790165
Cdk2ap1	1829.98	0.543843	0.179476	3.03016	0.00244421	0.0069173
Cdk2ap2	587.853	0.95208	0.245207	3.88276	0.000103278	0.000568818
Cdk4	1982.57	0.319688	0.105467	3.03117	0.00243608	0.00690071
Cdk5	4803.19	0.293141	0.107509	2.72666	0.00639782	0.0147442
Cdk5r1	15064	0.389828	0.124326	3.13554	0.00171538	0.00522235
Cdk5rap1	1251.74	-0.0301943	0.0968346	-0.311814	0.755182	0.80087
Cdk5rap2	3341.23	-0.179792	0.095247	-1.88764	0.0590748	0.0919115
Cdk5rap3	1055.05	0.24859	0.113563	2.18901	0.0285958	0.0502074
Cdk6	640.897	-0.353291	0.123082	-2.87037	0.00409985	0.0103912
Cdk7	2729.63	-0.0454872	0.0675122	-0.673764	0.500462	0.570918
Cdk8	7522.48	-0.396529	0.0997884	-3.9737	7.07644e-05	0.000429762
Cdk9	3436.88	0.324192	0.0937298	3.45879	0.000542609	0.00210196
Cdkal1	10088.4	-0.474555	0.125382	-3.78486	0.000153794	0.000780052
Cdkl1	1671.2	-0.176364	0.0883813	-1.99549	0.0459891	0.0747012
Cdkl2	3542.62	-0.300125	0.0822643	-3.6483	0.000263982	0.00120033
Cdkl3	1552.62	-0.330602	0.122636	-2.69579	0.0070222	0.0159142
Cdkl4	1374.78	-0.266196	0.112335	-2.36965	0.0178047	0.0338583
Cdkl5	37875.9	-0.727135	0.0840991	-8.64617	5.32545e-18	5.74882e-15
Cdkn1a	508.271	1.05738	0.216258	4.88942	1.01135e-06	1.41786e-05
Cdkn1b	2935.81	0.100766	0.0880317	1.14465	0.252353	0.317963
Cdkn1c	272.509	-0.279193	0.276465	-1.00987	0.312558	0.382221
Cdkn2aip	2063.35	-0.577993	0.215406	-2.68327	0.00729065	0.0164071
Cdkn2aipnl	2273.4	-0.0405953	0.126083	-0.321973	0.747473	0.794451
Cdkn2c	156.955	0.159271	0.139573	1.14113	0.253818	0.319529
Cdkn2d	1673.99	0.41172	0.147983	2.78221	0.00539907	0.0128897
Cdo1	1815.47	0.152694	0.105868	1.44231	0.149216	0.202636
Cdon	2780.44	-0.330345	0.119186	-2.77168	0.00557675	0.0132455
Cdpf1	515.45	0.431244	0.204435	2.10945	0.0349061	0.0592548
Cdr2	871.637	-0.176675	0.101953	-1.73291	0.0831116	0.122903
Cdr2l	1858.23	0.190716	0.133979	1.42348	0.154597	0.208633
Cds1	6841.98	-0.0289514	0.0657934	-0.440035	0.659912	0.717336
Cds2	32027.4	0.49563	0.145537	3.40553	0.000660365	0.0024497
Cdv3	5768.74	0.0369498	0.0755483	0.489088	0.624779	0.685635
Cdyl	5057.6	-0.315667	0.0872856	-3.61648	0.000298632	0.00131712
Cdyl2	2564.12	-0.063277	0.171306	-0.36938	0.711844	0.763537
Ceacam1	243.092	-0.742773	0.291898	-2.54464	0.0109392	0.0227349
Cebpa	207.283	0.948036	0.264996	3.57755	0.000346826	0.00148326
Cebpb	164.694	0.116782	0.236079	0.494676	0.620829	0.682302
Cebpd	122.635	1.78501	0.349137	5.11263	3.17707e-07	5.61469e-06
Cebpg	3049.78	-0.170355	0.0898434	-1.89613	0.0579431	0.0904909
Cebpz	4171.46	-0.212367	0.159016	-1.33551	0.18171	0.239336
Cebpzos	843.431	0.321335	0.145136	2.21404	0.0268264	0.04763
Cecr2	838.579	-0.319637	0.141503	-2.25887	0.0238913	0.0431704
Cecr5	3686.01	0.27103	0.114224	2.37279	0.0176543	0.0336216
Cecr6	3849.27	0.430075	0.129846	3.31219	0.000925698	0.00321488
Celf1	24085.4	-0.264063	0.0717985	-3.67783	0.000235227	0.00109846
Celf2	408549	-0.767845	0.147728	-5.1977	2.01769e-07	3.88369e-06
Celf3	5756.79	0.29255	0.146683	1.99444	0.0461035	0.0748589
Celf4	47215.1	-0.163944	0.0869579	-1.88532	0.0593865	0.092341
Celf5	8898.72	0.147366	0.126326	1.16656	0.243389	0.308258
Celf6	1353.87	0.252526	0.119165	2.11912	0.0340802	0.0580811
Celsr1	493.693	0.679487	0.173229	3.92249	8.76396e-05	0.000503675
Celsr2	14510.9	0.435801	0.214908	2.02785	0.0425751	0.069954
Celsr3	5065.8	0.3696	0.191598	1.92904	0.0537262	0.0849261
Cemip	3916.93	-0.161294	0.129445	-1.24604	0.212748	0.274195
Cend1	15178.7	-0.042198	0.165382	-0.255154	0.798604	0.838069
Cenpc1	4726.11	-0.607041	0.135793	-4.47033	7.81003e-06	7.48861e-05
Cenpe	208.488	-0.796957	0.293943	-2.71126	0.00670271	0.0153242
Cenpj	422.735	-0.267751	0.175807	-1.52299	0.127762	0.176933
Cenpk	179.97	-0.989594	0.253966	-3.89656	9.75675e-05	0.000547138
Cenpo	510.757	-0.0819274	0.11653	-0.703059	0.482019	0.553178
Cenpp	744.657	-0.614017	0.195797	-3.13599	0.00171273	0.00521673
Cenpq	440.609	-0.572142	0.208897	-2.73887	0.00616502	0.0143401
Cenpt	742.508	0.385182	0.138839	2.7743	0.00553211	0.0131516
Cenpu	312.975	-0.132166	0.123522	-1.06998	0.284629	0.352764
Cenpv	1627.61	0.0169277	0.104874	0.161409	0.871771	0.898403
Cenpw	267.621	-0.328563	0.170225	-1.93017	0.0535859	0.084756
Cep104	2196.18	0.325487	0.0918323	3.54436	0.000393562	0.00164564
Cep112	7257.84	-0.812586	0.188378	-4.31358	1.6063e-05	0.000133128
Cep120	5133.26	-0.250145	0.091187	-2.7432	0.00608429	0.0141828
Cep126	3975.3	-0.655661	0.152858	-4.28936	1.79189e-05	0.000145076
Cep128	2088.52	-0.592655	0.16872	-3.51266	0.000443637	0.00180096
Cep131	1500.23	0.482688	0.23433	2.05987	0.0394114	0.0655542
Cep135	1670.33	-0.278826	0.115753	-2.4088	0.0160051	0.0310374
Cep152	718.156	-0.0917373	0.125467	-0.731167	0.464677	0.536396
Cep162	3556.12	-0.581811	0.157964	-3.68319	0.000230331	0.00107793
Cep164	2280.73	0.0017122	0.129259	0.0132462	0.989431	0.991038
Cep170	18550.2	-0.627959	0.162384	-3.86712	0.000110127	0.000598149
Cep170b	14618.5	0.512795	0.174067	2.94597	0.00321944	0.0086042
Cep19	5005.67	-0.18554	0.144689	-1.28233	0.199726	0.259687
Cep192	1749.45	-0.563854	0.111557	-5.05439	4.3176e-07	7.14307e-06
Cep250	3458.36	-0.126343	0.147422	-0.857014	0.391437	0.46278
Cep290	6436.75	-0.786397	0.20373	-3.85999	0.000113392	0.00061331
Cep295	6061.98	-0.536657	0.127807	-4.19896	2.68147e-05	0.000199976
Cep350	15096.6	-0.532537	0.143778	-3.7039	0.000212311	0.00101076
Cep41	636.579	-0.0837382	0.126827	-0.660255	0.50909	0.578995
Cep44	1508.35	-0.314657	0.110601	-2.84498	0.00444138	0.0110727
Cep57	1806.48	-0.33409	0.128992	-2.59	0.00959764	0.0204756
Cep57l1	1335.01	-0.352682	0.114404	-3.08278	0.00205079	0.00601448
Cep63	2656.83	-0.17663	0.0735954	-2.40002	0.0163942	0.0316828
Cep68	2901.47	0.0562658	0.0683614	0.823064	0.410471	0.482246
Cep70	3789.19	-0.508114	0.118319	-4.29445	1.75126e-05	0.000142768
Cep72	146.894	-0.245622	0.125846	-1.95176	0.0509662	0.0813865
Cep76	770.983	-0.163727	0.097816	-1.67382	0.0941653	0.136812
Cep78	1872.61	-0.307211	0.111834	-2.74704	0.00601366	0.0140517
Cep83	8855.94	-0.656445	0.12557	-5.22773	1.71608e-07	3.42002e-06
Cep85	2225.8	-0.0696562	0.0634482	-1.09784	0.272272	0.339797
Cep85l	7322.14	-0.806571	0.136533	-5.90753	3.47281e-09	1.4677e-07
Cep89	1419.26	0.135426	0.0951793	1.42285	0.154781	0.208837
Cep95	1771.63	-0.20605	0.100195	-2.05649	0.0397349	0.0660244
Cep97	2781.88	0.00727312	0.104784	0.0694107	0.944663	0.955844
Cept1	6106.99	-0.320309	0.0938744	-3.4121	0.000644645	0.00239964
Cercam	319.915	0.295878	0.19554	1.51314	0.130245	0.17989
Cerk	4798.62	0.142255	0.0712872	1.99552	0.0459861	0.0747012
Cerkl	624.068	-0.642524	0.135634	-4.7372	2.16694e-06	2.62586e-05
Cers1	3807.97	0.415107	0.137521	3.0185	0.00254029	0.00713351
Cers2	2487.97	0.308741	0.102726	3.00549	0.00265153	0.0073819
Cers4	5629.62	-0.426051	0.135538	-3.14341	0.0016699	0.00510909
Cers5	4098.7	-0.0757941	0.0813642	-0.931541	0.351574	0.422907
Cers6	15432.2	-0.380347	0.0904834	-4.2035	2.6282e-05	0.000196909
Cetn2	2682.69	-0.338728	0.162253	-2.08765	0.0368294	0.0619917
Cetn3	6058.4	-0.558877	0.147241	-3.79567	0.000147245	0.000752728
Cetn4	649.131	-0.763952	0.205182	-3.72328	0.000196649	0.000949104
Cfap100	417.329	0.498498	0.127199	3.91904	8.8904e-05	0.000509135
Cfap20	3733.41	-0.216209	0.132242	-1.63495	0.102059	0.146458
Cfap206	223.615	-0.615893	0.198165	-3.10798	0.00188372	0.00563031
Cfap36	8604.2	-0.334473	0.117845	-2.83824	0.00453636	0.0112575
Cfap43	153.85	0.235053	0.183998	1.27747	0.201435	0.261724
Cfap44	507.404	-0.10823	0.216586	-0.499708	0.61728	0.679093
Cfap45	346.897	-0.0215774	0.186698	-0.115574	0.90799	0.927684
Cfap46	460.325	-0.0140228	0.230382	-0.0608676	0.951465	0.96111
Cfap54	2647.64	-0.403484	0.13933	-2.89589	0.00378082	0.00975439
Cfap61	399.632	-0.199686	0.112168	-1.78025	0.0750357	0.112658
Cfap65	248.871	-0.343124	0.214499	-1.59966	0.109675	0.155594
Cfap69	3062.08	-0.557653	0.10253	-5.43893	5.36028e-08	1.36957e-06
Cfap70	178.777	-0.395699	0.172681	-2.2915	0.0219346	0.0403438
Cfap74	1245.64	-0.191084	0.0974056	-1.96173	0.0497935	0.0797805
Cfap97	3585.09	-0.407941	0.16076	-2.53757	0.0111624	0.0231022
Cfap99	316.486	-0.305326	0.141363	-2.15987	0.030783	0.0533391
Cfdp1	6712.07	-0.398567	0.167225	-2.38342	0.0171525	0.0328801
Cfh	2867.03	0.115427	0.207085	0.557392	0.57726	0.642259
Cfl1	40076.6	0.343083	0.144803	2.36932	0.017821	0.0338693
Cfl2	4987.03	-0.283967	0.11357	-2.50038	0.0124061	0.0252104
Cflar	2096.76	0.0480326	0.120514	0.398566	0.690213	0.743722
Cfp	478.104	0.139106	0.173855	0.800127	0.423637	0.495378
Cftr	284.535	-0.544519	0.203414	-2.67691	0.00743056	0.0166503
Cggbp1	6079.95	-0.369236	0.137834	-2.67884	0.00738777	0.0165738
Cgn	354.539	0.1576	0.178169	0.884555	0.376397	0.447569
Cgnl1	1783.72	-0.0466654	0.175431	-0.266005	0.790236	0.831155
Cgref1	1077.56	0.0487598	0.105118	0.46386	0.642748	0.701446
Cgrrf1	1640.32	-0.0682469	0.077079	-0.885415	0.375933	0.447102
CH25-588N10.2	1276.75	-0.563879	0.154319	-3.65398	0.000258211	0.00118068
CH36-200G6.4	4289.58	-0.155209	0.0658373	-2.35747	0.0183999	0.0348062
Chac1	501.52	0.805843	0.219241	3.67561	0.000237285	0.00110688
Chac2	885.3	-0.283207	0.119172	-2.37645	0.0174799	0.0333876
Chadl	632.803	0.678086	0.199316	3.40206	0.000668792	0.00247529
Chaf1a	329.583	0.0743208	0.128394	0.57885	0.56269	0.628586
Champ1	2985.38	0.0166124	0.0795827	0.208744	0.834648	0.867791
Chat	286.521	0.652166	0.284204	2.29471	0.02175	0.0401009
Chchd1	1162.44	0.598092	0.21895	2.73164	0.00630202	0.0145753
Chchd10	8182.88	0.34552	0.193836	1.78253	0.0746627	0.112228
Chchd3	13281.2	-0.369107	0.0818864	-4.50755	6.55816e-06	6.49499e-05
Chchd4	1720.75	0.499846	0.193241	2.58665	0.0096914	0.0206247
Chchd5	543.127	-0.00264011	0.161376	-0.01636	0.986947	0.989085
Chchd6	8505.41	-0.164262	0.154484	-1.0633	0.287648	0.355994
Chchd7	1779.15	-0.144941	0.0891249	-1.62627	0.103893	0.148661
Chd1	15586.4	-0.584375	0.134485	-4.34527	1.39105e-05	0.000118317
Chd1l	962.675	-0.00292521	0.114181	-0.0256191	0.979561	0.983585
Chd2	16730.2	-0.362479	0.102962	-3.5205	0.000430732	0.0017635
Chd3	38202.8	0.490562	0.142373	3.44562	0.000569753	0.00218231
Chd3os	7073.23	-0.258932	0.141741	-1.8268	0.0677301	0.10355
Chd4	19444.7	0.00672271	0.0801813	0.0838439	0.933181	0.947368
Chd5	19629.2	0.141868	0.108546	1.30698	0.19122	0.250184
Chd6	20955.8	-0.476752	0.111316	-4.28286	1.84508e-05	0.000148271
Chd7	2846.33	-0.0431901	0.145926	-0.295972	0.767251	0.811212
Chd8	11851.5	-0.171408	0.0971017	-1.76525	0.0775224	0.115868
Chd9	25668.5	-0.453662	0.114546	-3.96051	7.47896e-05	0.000447448
CHDC2	687.786	-0.864179	0.165136	-5.23313	1.66663e-07	3.35611e-06
Chdh	390.502	0.0300371	0.138388	0.217051	0.828169	0.862595
Chek1	138.954	-0.279138	0.177233	-1.57498	0.115261	0.162239
Chek2	119.751	-0.0150271	0.177291	-0.0847593	0.932453	0.946926
Cherp	1904.38	0.364312	0.131548	2.76943	0.0056155	0.0133107
Chfr	4385.33	-0.195201	0.110719	-1.76304	0.0778943	0.116303
Chga	8827.45	0.245665	0.122526	2.005	0.0449629	0.0732917
Chgb	41612.1	-0.676953	0.351855	-1.92396	0.05436	0.0857519
Chic1	6578.09	-0.489682	0.12236	-4.00196	6.28195e-05	0.000391045
Chic2	3261.91	-0.379768	0.119397	-3.18071	0.00146916	0.00462492
Chid1	4573.38	0.280265	0.146705	1.9104	0.0560813	0.0880152
Chil1	458.899	-0.0340894	0.171943	-0.19826	0.842842	0.874223
Chka	7223.44	-0.215761	0.0788873	-2.73505	0.00623706	0.0144586
Chl1	24378.5	-0.62195	0.162091	-3.83704	0.000124525	0.000661649
Chm	13604.1	-0.820541	0.162159	-5.06011	4.19008e-07	6.98563e-06
Chmp1a	3830.34	0.791782	0.308741	2.56455	0.0103309	0.0217075
Chmp2a	5752.08	-0.223149	0.168377	-1.32529	0.185075	0.243249
Chmp2b	3233.74	-0.0551731	0.109966	-0.501728	0.615859	0.678041
Chmp3	11466.1	-0.253926	0.0924127	-2.74774	0.00600081	0.014034
Chmp4b	8562.98	0.305948	0.125389	2.43999	0.0146876	0.0289285
Chmp5	5364.86	0.0403164	0.0924653	0.436016	0.662825	0.719839
Chmp6	1362.43	0.638809	0.213481	2.99235	0.0027684	0.00764809
Chmp7	5295.42	0.099891	0.0822099	1.21507	0.224338	0.287133
Chn1	77745.9	-0.268581	0.116134	-2.3127	0.0207394	0.0385338
Chn2	6644.19	-0.266326	0.122185	-2.17969	0.0292803	0.0511526
Chordc1	9676.12	-0.342778	0.128924	-2.65876	0.00784295	0.0174117
Chp1	7252.1	0.176037	0.0892435	1.97254	0.0485478	0.0780937
Chpf	3310.4	0.991429	0.367453	2.69811	0.00697342	0.0158313
Chpf2	4804.44	0.56182	0.329548	1.70482	0.0882285	0.129303
Chpt1	7750.45	-0.713009	0.168445	-4.23288	2.30718e-05	0.000176847
Chrac1	690.304	0.296165	0.181988	1.62738	0.103655	0.148371
Chrd	1476.62	0.63947	0.250988	2.54781	0.0108402	0.0225689
Chrdl1	1467.28	-0.77711	0.161978	-4.79762	1.60565e-06	2.0758e-05
Chrm1	9323.5	0.159537	0.0769556	2.07311	0.0381624	0.0638208
Chrm2	6354.57	-0.588785	0.148311	-3.96993	7.18943e-05	0.000435196
Chrm3	39506.6	-1.01258	0.13774	-7.35143	1.96102e-13	4.49051e-11
Chrm4	1222.76	0.257198	0.1804	1.42571	0.153952	0.207956
Chrna4	2887.61	-0.0905397	0.107517	-0.8421	0.399732	0.470996
Chrna5	246.112	-0.0420833	0.208334	-0.201999	0.839918	0.871888
Chrna7	4044.93	-0.618403	0.112773	-5.4836	4.16756e-08	1.11542e-06
Chrnb2	3594.27	0.300783	0.103884	2.89536	0.00378725	0.00976147
Chst1	8111.83	0.593397	0.143476	4.13585	3.53642e-05	0.000246958
Chst10	4493.81	0.238864	0.0793319	3.01094	0.0026044	0.00726785
Chst11	6504.9	0.147224	0.143546	1.02562	0.305068	0.374264
Chst12	832.618	0.446658	0.121809	3.66688	0.000245526	0.00113582
Chst2	8519.87	0.0869845	0.0674217	1.29016	0.196997	0.256627
Chst3	184.328	0.492646	0.145436	3.38738	0.000705626	0.00258066
Chst7	118.609	0.428009	0.211184	2.02671	0.0426922	0.0701287
Chst8	950.467	0.409821	0.195662	2.09453	0.0362127	0.0611444
Chst9	446.914	-0.297874	0.199647	-1.49201	0.135698	0.18629
Chsy1	2991.01	-0.115887	0.102058	-1.1355	0.256165	0.322045
Chsy3	41355.3	-0.843042	0.123476	-6.82759	8.63538e-12	1.11863e-09
Chtf8	4495.74	0.406675	0.143503	2.8339	0.00459834	0.0113695
Chtop	9496.38	0.226173	0.101915	2.21924	0.0264707	0.0471148
Chuk	5598.14	-0.19126	0.0952783	-2.00738	0.044709	0.0729653
Churc1	287.089	0.754064	0.298776	2.52384	0.0116081	0.0238532
Ciao1	3915.77	-0.0773693	0.106029	-0.729701	0.465573	0.537382
Ciapin1	2549.4	0.516447	0.165134	3.12744	0.00176335	0.00534077
Ciart	795.692	0.188213	0.171602	1.0968	0.272728	0.340162
Cib1	370.678	1.02007	0.238005	4.28591	1.81989e-05	0.000146609
Cib2	1009.38	0.337189	0.137879	2.44554	0.0144635	0.0285785
Cic	6883.06	0.534137	0.212291	2.51606	0.0118675	0.0243131
Cinp	3300.41	0.0659112	0.0869138	0.758351	0.448241	0.519985
Cipc	8183.1	0.0360028	0.0471859	0.763	0.445463	0.517119
Cir1	2846.69	-0.552914	0.185702	-2.97742	0.00290685	0.00794248
Cirbp	3252.71	0.320883	0.177615	1.80662	0.0708213	0.107489
Cisd1	3991.38	0.657223	0.187525	3.50473	0.000457069	0.00183992
Cisd2	4408.27	-0.254148	0.084092	-3.02226	0.00250896	0.00706238
Cisd3	843.816	0.0223186	0.159777	0.139686	0.888908	0.911784
Cish	203.949	0.536294	0.211691	2.53338	0.0112968	0.0233341
Cit	9974.99	0.000821821	0.11159	0.00736467	0.994124	0.995046
Cited2	1008.18	0.388753	0.120195	3.23436	0.00121916	0.00399925
Cited4	308.726	0.614624	0.252713	2.4321	0.0150114	0.0294232
Ciz1	3165.6	-0.231845	0.154259	-1.50296	0.132848	0.182959
Ckap4	1082.23	0.343264	0.107161	3.20325	0.00135886	0.00436141
Ckap5	26297.7	-0.394025	0.12413	-3.17429	0.00150202	0.00471168
Ckb	67561.2	0.773908	0.231207	3.34725	0.000816186	0.00290703
Cklf	264.637	0.0499654	0.137577	0.36318	0.71647	0.767291
Ckmt1	11456.7	0.189899	0.101039	1.87946	0.0601817	0.0934317
Clasp1	17406.7	-0.256033	0.0878268	-2.9152	0.00355459	0.00930791
[truncated: 10,954 more rows]

## Sheet: DEG_WT_CS|RS
Gene	baseMean	log2FoldChange	lfcSE	stat	pvalue	padj
0610009O20Rik	2926.65	0.114712	0.0721938	1.58895	0.112072	0.179298
1810055G02Rik	1574.95	-0.242584	0.137217	-1.76789	0.0770794	0.13496
2410015M20Rik	2349.65	0.562981	0.272874	2.06315	0.039098	0.0831897
2510009E07Rik	6882.94	-0.144405	0.191699	-0.75329	0.451276	0.538132
2700062C07Rik	1096.19	-0.0885614	0.114345	-0.774511	0.438629	0.525894
2810403A07Rik	6728.35	-0.178092	0.0688414	-2.58699	0.00968196	0.033208
2900055J20Rik	1325.35	-0.415055	0.118122	-3.51379	0.000441762	0.00566199
3110082I17Rik	1387.52	0.0373056	0.220167	0.169443	0.865448	0.897144
8030462N17Rik	17968.3	-0.463118	0.140488	-3.29649	0.000979027	0.00878378
9130011E15Rik	4363.71	-0.244759	0.106749	-2.29283	0.0218576	0.0553045
9930104L06Rik	1312.67	0.170456	0.104396	1.63278	0.102516	0.167959
9930111J21Rik2	464.748	-0.464611	0.515527	-0.901235	0.367463	0.456838
A4galt	311.531	0.320568	0.197761	1.62098	0.105021	0.170817
Aaas	835.506	0.0814026	0.120374	0.676245	0.498885	0.582845
Aacs	2828.63	0.447836	0.221193	2.02464	0.0429047	0.0889807
Aaed1	1385.41	-0.219684	0.118717	-1.85049	0.0642433	0.118536
Aagab	5797.94	0.114037	0.110286	1.03401	0.301131	0.389828
Aak1	42928.5	-0.166588	0.0464232	-3.58847	0.000332627	0.00493693
Aamdc	1670.23	-0.185815	0.0833622	-2.22901	0.0258135	0.0617651
Aamp	8378.89	0.189443	0.105554	1.79475	0.0726943	0.129696
Aar2	2512.47	0.367525	0.152634	2.40789	0.0160451	0.0454219
Aard	156.971	-0.116548	0.162377	-0.717758	0.472907	0.558667
Aars	13274.6	0.0169315	0.083964	0.201652	0.840189	0.876602
Aars2	1969.57	0.475115	0.219171	2.16778	0.0301752	0.0689272
Aasdh	1155.39	0.0516155	0.0809137	0.637909	0.523533	0.606216
Aasdhppt	3872.58	-0.290132	0.14295	-2.0296	0.0423973	0.088261
Aass	446.771	0.0180997	0.142257	0.127233	0.898756	0.923144
Aatf	4028.8	-0.381887	0.0776944	-4.91524	8.86737e-07	0.000166837
Aatk	15356.9	0.669555	0.351403	1.90538	0.0567309	0.108234
Abat	20751.4	0.322766	0.108584	2.97251	0.0029538	0.0165285
Abca1	6295.71	-0.111632	0.0944228	-1.18226	0.237103	0.322266
Abca17	253.842	-0.290726	0.147585	-1.96989	0.0488515	0.0974897
Abca2	19068.8	0.451087	0.140575	3.20887	0.00133259	0.0104149
Abca3	9369.3	0.146016	0.0944884	1.54534	0.122265	0.191698
Abca4	514.143	-0.272638	0.148841	-1.83175	0.0669893	0.122245
Abca5	9702.07	-0.352011	0.103341	-3.40631	0.000658463	0.0070972
Abca6	426.77	-0.220805	0.155888	-1.41643	0.156648	0.231963
Abca7	1841.93	0.30887	0.234853	1.31517	0.188454	0.268734
Abca8a	904.282	-0.0641537	0.128643	-0.498694	0.617995	0.689812
Abca8b	6389.24	-0.350345	0.203	-1.72584	0.0843766	0.14496
Abca9	1266.43	-0.0120583	0.152177	-0.0792385	0.936843	0.952855
Abcb10	1809.27	0.325641	0.145324	2.24079	0.0250399	0.0604797
Abcb1a	3646.14	-0.24769	0.157027	-1.57737	0.11471	0.182401
Abcb1b	812.498	-0.321459	0.129256	-2.48699	0.0128829	0.0394599
Abcb4	1226.46	-0.122551	0.133099	-0.920748	0.357182	0.446704
Abcb7	7257.28	-0.294954	0.128773	-2.29049	0.0219926	0.0554964
Abcb8	2634.14	0.571169	0.25722	2.22055	0.0263814	0.0628302
Abcb9	4138.58	0.42684	0.239674	1.78092	0.074926	0.132514
Abcc1	3192.03	-0.0213388	0.0980112	-0.217718	0.827648	0.866454
Abcc10	692.495	0.506202	0.166057	3.04836	0.00230093	0.014374
Abcc3	187.988	0.469071	0.156156	3.00386	0.00266574	0.0156041
Abcc4	2975.2	-0.130855	0.0819489	-1.59679	0.110312	0.177148
Abcc5	16299.5	0.00405576	0.0832426	0.0487221	0.961141	0.972312
Abcc6	165.119	0.364472	0.223344	1.63189	0.102704	0.16818
Abcc8	2702.62	-0.0750089	0.173203	-0.433069	0.664964	0.731684
Abcc9	1033.9	-0.144452	0.107817	-1.33979	0.180314	0.259294
Abcd1	903.322	0.241136	0.11203	2.15243	0.0313638	0.070908
Abcd2	7463.61	-0.434946	0.12711	-3.42182	0.00062203	0.00684901
Abcd3	7544.97	-0.142818	0.0788356	-1.8116	0.0700484	0.126136
Abcd4	660.24	0.136978	0.111392	1.2297	0.218811	0.302875
Abce1	13080.4	-0.409202	0.173244	-2.362	0.0181764	0.0491129
Abcf1	6413.23	0.119274	0.12866	0.927048	0.353901	0.443523
Abcf2	6616.12	0.238047	0.0983098	2.42139	0.0154611	0.0443353
Abcf3	4345.97	0.230736	0.0885962	2.60435	0.00920478	0.0321621
Abcg1	7384.93	0.266255	0.113214	2.35178	0.0186837	0.0500501
Abcg2	2517.09	-0.314406	0.105561	-2.97844	0.00289717	0.0163504
Abcg4	2795.7	0.300767	0.167597	1.79458	0.072721	0.129726
Abhd10	2204.75	-0.0122153	0.0758704	-0.161002	0.872092	0.901547
Abhd11	996.296	0.394045	0.149606	2.63388	0.00844142	0.0304997
Abhd12	19579.5	0.127295	0.112435	1.13216	0.257566	0.344373
Abhd13	4475.77	-0.0328698	0.0656435	-0.500733	0.616559	0.688397
Abhd14a	1942.17	0.293308	0.23986	1.22283	0.221393	0.30572
Abhd14b	780.219	0.0830108	0.166873	0.497448	0.618873	0.690629
Abhd16a	4055.21	0.455354	0.195923	2.32415	0.0201177	0.0526137
Abhd17a	3846.5	1.28887	0.558674	2.30701	0.0210541	0.0541585
Abhd17b	4286.77	-0.443256	0.125096	-3.54334	0.000395087	0.0053946
Abhd17c	2108.39	0.0362649	0.0966603	0.375179	0.707527	0.767323
Abhd2	19161	-0.138283	0.0727185	-1.90162	0.0572208	0.108925
Abhd3	4817.85	-0.34779	0.122815	-2.83181	0.00462852	0.0215885
Abhd4	2886.79	0.310989	0.107555	2.89145	0.00383468	0.0193012
Abhd5	1930.72	-0.237037	0.0981851	-2.41419	0.0157704	0.0448968
Abhd6	3304.27	-0.101648	0.0873511	-1.16367	0.244556	0.330547
Abhd8	9127.92	0.864998	0.454803	1.90192	0.057182	0.108867
Abi1	16252.4	-0.216851	0.0858781	-2.52511	0.0115663	0.0369672
Abi2	36429.6	-0.249794	0.0900254	-2.77471	0.00552516	0.0239705
Abi3	287.869	0.581066	0.181781	3.19652	0.00139098	0.0106335
Abi3bp	7838.2	-0.286442	0.401765	-0.712958	0.475872	0.561393
Abl1	5827.22	0.0924647	0.127352	0.726055	0.467805	0.554073
Abl2	10470.2	0.0236374	0.0982028	0.2407	0.809787	0.851168
Ablim1	19762.6	-0.344992	0.0850885	-4.05451	5.02399e-05	0.00169596
Ablim2	19732.8	0.0573144	0.108996	0.525839	0.599	0.672482
Ablim3	3784.03	-0.268273	0.180819	-1.48365	0.137902	0.210062
Abr	37684.3	0.169007	0.0945992	1.78656	0.074009	0.13151
Abracl	730.054	0.0636846	0.0933231	0.682409	0.49498	0.579712
Abt1	1002.73	0.487474	0.166713	2.92403	0.00345528	0.018125
Abtb1	1812.1	0.542319	0.267227	2.02943	0.0424141	0.088261
Abtb2	1899.21	-0.0476633	0.12288	-0.387886	0.6981	0.75971
AC074312.5	1448.94	-0.122427	0.0679224	-1.80245	0.0714749	0.128038
AC074335.4	164.097	-0.153701	0.287954	-0.533769	0.593501	0.66707
AC090443.3	1405.85	-0.33137	0.146021	-2.26933	0.0232485	0.0576102
AC092855.1	178.403	-0.133568	0.132543	-1.00774	0.313582	0.402363
AC099860.1	6018.04	-0.391846	0.107777	-3.63572	0.000277205	0.00446671
AC102077.1	588.985	0.0846812	0.0865148	0.978807	0.327675	0.416847
AC102096.1	2102.87	0.145586	0.0752368	1.93504	0.0529859	0.103386
AC102506.1	607.416	-0.0501714	0.102775	-0.488167	0.625432	0.696398
AC102628.1	2831.28	-0.498532	0.170726	-2.92006	0.00349961	0.0182379
AC103620.3	38159.7	-0.166486	0.101371	-1.64234	0.100519	0.165429
AC103635.1	39262.2	-0.400904	0.192015	-2.08787	0.0368092	0.0795366
AC104325.1	4333.84	0.531295	0.201649	2.63475	0.00841995	0.0304565
AC107707.3	371.222	0.329027	0.154815	2.12529	0.0335626	0.0744193
AC109152.2	1285.92	-0.206014	0.130376	-1.58015	0.114073	0.181704
AC110508.1	429.863	-0.00772378	0.133522	-0.0578463	0.953871	0.966939
AC113182.4	761.456	0.218272	0.113028	1.93114	0.0534659	0.104003
AC114005.5	6411.86	0.291721	0.0979918	2.977	0.00291088	0.0163916
AC114558.6	440.677	-0.349397	0.217985	-1.60285	0.108968	0.175579
AC114920.2	3256.11	-0.222138	0.134688	-1.64928	0.0990903	0.163793
AC116475.2	566.347	0.40945	0.16417	2.49406	0.0126291	0.0390094
AC116718.1	745.55	-0.447587	0.220281	-2.03189	0.0421646	0.0879428
AC117750.1	749.63	-0.384138	0.233122	-1.6478	0.0993946	0.164147
AC121113.1	5871.16	-0.319806	0.151007	-2.11783	0.0341897	0.0753788
AC121838.2	15504.7	0.164315	0.0832382	1.97403	0.0483784	0.0967568
AC122423.2	154.26	-0.197726	0.140162	-1.4107	0.158334	0.233834
AC123679.2	4796.23	-0.370183	0.126848	-2.91832	0.0035192	0.0182804
AC123684.1	1282.72	0.272328	0.147786	1.84272	0.0653699	0.120043
AC123686.4	1087.25	0.428966	0.168762	2.54183	0.0110272	0.0360334
AC124566.2	1302.31	0.104272	0.113947	0.915093	0.360143	0.449485
AC124713.2	3245.99	0.0663873	0.101973	0.651032	0.515026	0.59854
AC125061.1	1654.06	0.3608	0.120431	2.99592	0.00273622	0.0158404
AC126938.1	32839.6	0.142586	0.107373	1.32795	0.184196	0.263543
AC127333.1	4072.69	0.021372	0.0806703	0.26493	0.791063	0.835675
AC127339.2	991.021	0.0312995	0.0912076	0.343167	0.731473	0.787466
AC129188.1	1953.19	0.413204	0.199969	2.06635	0.0387959	0.0828224
AC129337.1	2443.08	-0.417923	0.125395	-3.33285	0.0008596	0.00828007
AC130827.2	19400.8	-0.37746	0.137189	-2.75139	0.00593436	0.0248687
AC131791.1	354.822	-0.214209	0.150973	-1.41886	0.15594	0.231209
AC131992.1	3680.28	-0.111678	0.172008	-0.649263	0.516168	0.599533
AC132242.1	1378.05	0.0719459	0.132206	0.544194	0.586308	0.660435
AC132303.1	330.471	0.119333	0.135122	0.883156	0.377152	0.465761
AC136513.6	138.959	-0.0742947	0.159644	-0.465379	0.64166	0.711202
AC139063.2	1558.05	-0.26496	0.127848	-2.07246	0.0382226	0.0818032
AC139867.2	357.947	0.178236	0.0942537	1.89102	0.0586212	0.110898
AC140321.1	24903.4	0.132584	0.157525	0.841672	0.399972	0.488752
AC141209.3	224.059	0.215075	0.19294	1.11472	0.264969	0.352392
AC152164.2	181.852	-0.259292	0.22635	-1.14553	0.251988	0.338202
AC153919.1	401.619	0.214176	0.129582	1.65282	0.0983673	0.162893
AC155158.1	2491.56	-0.140358	0.120359	-1.16616	0.243549	0.329329
AC157555.1	11059.9	-0.291201	0.123529	-2.35734	0.0184062	0.0495474
AC157561.9	754.122	0.183441	0.137028	1.33871	0.180664	0.259652
AC157667.1	7796.39	-0.182415	0.0809315	-2.25395	0.0241995	0.0591872
AC157774.6	1234.84	1.32484	0.53232	2.4888	0.0128176	0.0393447
AC158971.1	13310.3	-0.338358	0.0924701	-3.65911	0.00025309	0.00422917
AC159257.5	2049.43	0.510696	0.133792	3.81708	0.000135042	0.00297371
AC159266.3	364.21	0.0774054	0.135885	0.56964	0.568922	0.64597
AC160535.1	7327.21	-0.0933052	0.101821	-0.916362	0.359477	0.448761
AC161108.3	247.861	0.492425	0.170202	2.89318	0.00381366	0.0192379
AC161207.1	3139.46	0.119366	0.0887837	1.34446	0.1788	0.257463
AC161792.1	1490.75	-0.0618156	0.1574	-0.392729	0.69452	0.756655
AC162528.2	4484.21	0.218265	0.141927	1.53786	0.124082	0.193834
AC162689.1	543.874	-0.421255	0.195538	-2.15434	0.0312138	0.0706564
AC163329.3	661.032	1.42564	0.803259	1.77482	0.075928	0.133584
AC163616.2	3702.15	0.276341	0.149806	1.84466	0.0650866	0.119695
AC163993.2	618.422	-0.344822	0.138075	-2.49736	0.0125121	0.0387416
AC164703.3	2268.32	0.0934251	0.0994928	0.939013	0.347724	0.437356
AC165086.3	5753.3	0.0909089	0.0772497	1.17682	0.239268	0.324864
AC166328.1	3966.52	-0.00788191	0.12829	-0.0614382	0.95101	0.964505
AC166332.1	10294.8	-0.204397	0.0779822	-2.62107	0.00876542	0.0312207
AC167815.1	12456.2	-0.216663	0.108484	-1.99719	0.0458048	0.0932651
AC168051.1	2166.64	-0.108351	0.067201	-1.61235	0.106887	0.172971
Acaa1a	2844.37	0.645015	0.254386	2.53558	0.0112261	0.0363627
Acaa2	1105.17	0.271934	0.118509	2.29462	0.0217547	0.0551481
Acaca	16000.8	-0.212892	0.0540342	-3.93994	8.15008e-05	0.00219059
Acacb	336.39	0.588301	0.131406	4.47697	7.57088e-06	0.000594244
Acad10	636.435	0.0744434	0.104042	0.715511	0.474293	0.559937
Acad11	2642.54	-0.1057	0.0606071	-1.74402	0.0811564	0.14056
Acad12	273.116	0.439652	0.126996	3.46194	0.000536303	0.00634732
Acad8	2213.03	-0.101821	0.0541211	-1.88136	0.059923	0.112694
Acad9	2410.96	0.219971	0.127281	1.72824	0.0839457	0.144374
Acadl	1442.52	-0.305628	0.223853	-1.36531	0.172156	0.249639
Acadm	2659.92	-0.0716374	0.0870603	-0.822848	0.410594	0.498874
Acads	264.508	0.898335	0.266351	3.37275	0.000744206	0.00750453
Acadsb	7579.52	-0.415646	0.142159	-2.92382	0.00345765	0.01813
Acadvl	2223.35	0.423973	0.16922	2.50545	0.0122297	0.0382336
Acan	425.898	0.202839	0.146578	1.38383	0.16641	0.243153
Acap2	27768.6	-0.209916	0.085665	-2.45043	0.0142686	0.0421892
Acap3	7393.38	0.455517	0.176987	2.57372	0.010061	0.0340592
Acat1	8250.03	0.0258929	0.0556782	0.465045	0.6419	0.711344
Acat2	3275.66	0.0512589	0.0906378	0.565535	0.57171	0.64828
Acat3	583.435	-0.0278023	0.132355	-0.210059	0.833622	0.871139
Acbd3	3402.17	-0.223086	0.108522	-2.05567	0.0398141	0.0843207
Acbd4	1800.62	0.455063	0.201169	2.26209	0.0236917	0.0583526
Acbd5	10409.2	-0.428243	0.173324	-2.47077	0.0134822	0.0406052
Acbd6	9018.07	-0.348737	0.0876985	-3.97654	6.99249e-05	0.00200849
Accs	305.507	0.148436	0.111223	1.33459	0.182012	0.261177
Acd	1432.42	-0.0134867	0.119624	-0.112743	0.910235	0.931942
Ace	961.269	-0.0148528	0.175923	-0.0844279	0.932716	0.949564
Ace2	145.256	-0.46946	0.201359	-2.33146	0.0197291	0.0519264
Acer2	612.904	0.0463329	0.16721	0.277094	0.781708	0.828186
Acer3	7462.9	-0.531005	0.160866	-3.30092	0.000963679	0.00871603
Ache	2496.03	0.48157	0.190662	2.52577	0.0115444	0.0369192
Acin1	10278.5	0.0581113	0.0741122	0.784099	0.432982	0.520816
Ackr1	1186.51	0.0852633	0.163057	0.522905	0.60104	0.67424
Ackr2	256.615	0.0792579	0.187832	0.421962	0.673053	0.739399
Ackr3	586.529	-0.00131016	0.150176	-0.00872416	0.993039	0.995061
Acly	14824.3	0.224656	0.0997852	2.2514	0.0243604	0.059346
Aco1	3599.21	-0.0506944	0.0509399	-0.995181	0.319648	0.408509
Aco2	32598.5	0.130675	0.0807039	1.61919	0.105407	0.171195
Acot1	385.949	0.531344	0.17898	2.96873	0.00299031	0.0166412
Acot11	2897.68	0.348685	0.106969	3.25969	0.00111534	0.00936948
Acot13	3043.48	0.0482576	0.129558	0.372478	0.709537	0.769045
Acot2	410.937	0.559147	0.150799	3.70791	0.000208979	0.00375516
Acot3	201.749	0.00192299	0.166289	0.0115641	0.990773	0.993491
Acot6	542.036	-0.060407	0.108384	-0.557344	0.577292	0.653213
Acot7	12455.5	0.296737	0.118329	2.50773	0.0121511	0.0380752
Acot8	893.45	0.547742	0.204567	2.67756	0.00741602	0.0283141
Acot9	2171.3	-0.146529	0.0739966	-1.98022	0.0476791	0.0957227
Acox1	15432.2	0.038588	0.0649387	0.594223	0.552363	0.63171
Acox3	2387.15	0.100165	0.107805	0.929129	0.352822	0.442463
Acp1	4576.89	-0.0921449	0.0690768	-1.33395	0.182221	0.261418
Acp2	5548.71	-0.0382989	0.08491	-0.451053	0.651951	0.720486
Acp6	1316.62	-0.0203399	0.104137	-0.195319	0.845143	0.88013
Acrbp	399.187	0.266156	0.120038	2.21727	0.0266047	0.0631257
Acsbg1	8542.96	0.402619	0.139967	2.87652	0.00402087	0.0199469
Acsf2	494.168	0.101945	0.223754	0.45561	0.64867	0.717356
Acsl1	6318.25	-0.192385	0.0615185	-3.12728	0.00176434	0.0123283
Acsl3	22882.9	-0.406372	0.199471	-2.03725	0.0416249	0.0872004
Acsl4	15428.8	-0.50081	0.160536	-3.1196	0.00181096	0.0124634
Acsl5	6710.21	-0.173716	0.0735891	-2.36062	0.0182445	0.0492314
Acsl6	22563.7	-0.102245	0.0586171	-1.74429	0.0811085	0.140496
Acss1	2484.27	0.0561856	0.0687677	0.817034	0.413909	0.502186
Acss2	4699.45	-0.175638	0.0495207	-3.54675	0.00039002	0.00535974
Acss3	257.114	-0.284817	0.305683	-0.931741	0.35147	0.44107
Acta1	466.089	0.505837	0.304527	1.66106	0.0967023	0.160697
Acta2	800.83	0.329238	0.239179	1.37654	0.168655	0.245704
Actb	119452	0.280851	0.0991441	2.83276	0.00461487	0.021574
Actg1	26582.6	0.298272	0.110082	2.70953	0.00673779	0.0268121
Actl6a	1434.69	0.0689767	0.0658446	1.04757	0.294838	0.383388
Actl6b	4012.31	0.289494	0.124939	2.31709	0.0204988	0.0532726
Actn1	7026.76	0.0913536	0.0935892	0.976113	0.329009	0.418215
Actn2	2855.57	0.258298	0.184326	1.40131	0.161122	0.236958
Actn4	7663.02	0.0200484	0.124413	0.161144	0.87198	0.901504
Actr10	9267.72	0.0215425	0.101005	0.213281	0.831108	0.868938
Actr1a	12849	0.314816	0.15685	2.00712	0.0447366	0.0917831
Actr1b	18007.3	0.241825	0.168391	1.43609	0.150976	0.225282
Actr2	21968.2	-0.0231221	0.0894668	-0.258443	0.796065	0.839572
Actr3	20262.4	-0.161427	0.085575	-1.88638	0.0592433	0.111739
Actr3b	11070.6	-0.126048	0.0983324	-1.28186	0.199892	0.281406
Actr5	820.096	0.52593	0.190637	2.75879	0.00580151	0.0245939
Actr6	1880.86	-0.0528909	0.0676211	-0.782166	0.434117	0.521756
Actr8	4770.48	0.218857	0.103761	2.10925	0.0349226	0.0765983
Acvr1	5093.72	-0.320818	0.103489	-3.10001	0.00193513	0.0130043
Acvr1b	9434.84	0.156534	0.10541	1.48501	0.137541	0.209631
Acvr1c	7035.85	-0.255225	0.140659	-1.81449	0.0696024	0.125721
Acvr2a	12743.7	-0.363605	0.147462	-2.46576	0.0136724	0.0410429
Acvr2b	700.087	0.405327	0.165884	2.44344	0.0145481	0.0426899
Acvrl1	922.401	0.558573	0.258242	2.16298	0.0305426	0.0695872
Acy1	582.642	0.559959	0.215924	2.59331	0.00950561	0.0328245
Acyp1	1450.21	-0.106219	0.115504	-0.919612	0.357776	0.447359
Acyp2	10606.5	-0.433044	0.1653	-2.61974	0.00879963	0.0313077
Adal	1773.76	-0.149663	0.0847153	-1.76666	0.0772844	0.135227
Adam10	11451.4	-0.516944	0.150343	-3.43842	0.000585114	0.00664469
Adam11	4899.91	0.397399	0.219153	1.81334	0.0697791	0.125899
Adam12	1804.98	0.206485	0.22304	0.925779	0.354561	0.444208
Adam15	3460.69	0.509982	0.229658	2.22062	0.026377	0.0628302
Adam17	2153.14	-0.146966	0.0951897	-1.54393	0.122606	0.192101
Adam18	574.859	-0.416008	0.322812	-1.2887	0.197502	0.278717
Adam19	2275.53	-0.118217	0.0712778	-1.65854	0.0972086	0.161392
Adam21	203.071	-0.489936	0.227965	-2.14917	0.0316207	0.0713391
Adam22	57442.5	-0.378817	0.0953728	-3.97196	7.12842e-05	0.00202062
Adam23	33507	-0.328522	0.112094	-2.93078	0.00338111	0.0178993
Adam32	345.854	-0.102512	0.204177	-0.502072	0.615617	0.687818
Adam33	399.871	-0.604791	0.178235	-3.39322	0.000690764	0.00725115
Adam8	173.812	0.218527	0.211285	1.03428	0.301008	0.389747
Adam9	6036.54	-0.161646	0.0995382	-1.62396	0.104384	0.170063
Adamts1	895.388	0.0900193	0.107838	0.834765	0.40385	0.492692
Adamts10	1612.54	0.21068	0.134719	1.56385	0.117853	0.186242
Adamts12	165.603	-0.246417	0.242068	-1.01797	0.308695	0.397168
Adamts15	482.939	0.136847	0.13591	1.0069	0.313985	0.4028
Adamts16	944.889	-0.313431	0.171301	-1.82971	0.0672932	0.122678
Adamts17	3706.99	-0.482012	0.156284	-3.08421	0.00204096	0.0134418
Adamts18	765.803	-0.519359	0.17925	-2.89739	0.00376276	0.0190808
Adamts2	902.338	0.211798	0.137692	1.5382	0.123999	0.193729
Adamts20	2732.07	-0.42955	0.111896	-3.83882	0.000123625	0.00285272
Adamts3	8204.14	-0.0231793	0.189686	-0.122198	0.902742	0.9259
Adamts4	1131.96	0.321873	0.140516	2.29065	0.0219837	0.0554882
Adamts5	269.81	-0.16998	0.130902	-1.29853	0.194106	0.274902
Adamts6	3312.3	-0.123555	0.188518	-0.655402	0.512209	0.595854
Adamts8	242.11	0.0847879	0.104217	0.813569	0.415892	0.503875
Adamts9	708.145	-0.171451	0.207077	-0.82796	0.407693	0.496267
Adamtsl1	3262.21	-0.340136	0.159418	-2.13361	0.032875	0.0733397
Adamtsl2	527.352	0.156433	0.241388	0.648058	0.516948	0.600166
Adamtsl3	469.475	-0.0483458	0.307993	-0.15697	0.875268	0.904027
Adamtsl4	383.126	0.280509	0.199845	1.40363	0.160428	0.236193
Adamtsl5	315.264	0.252983	0.154473	1.63771	0.101481	0.166552
Adap1	12018.6	0.232311	0.165287	1.4055	0.159873	0.235647
Adap2	923.433	-0.0536962	0.117456	-0.45716	0.647556	0.716371
Adar	16250.5	0.181487	0.112768	1.60939	0.107532	0.173771
Adarb1	22812.7	0.00126396	0.0871829	0.0144978	0.988433	0.99191
Adarb2	36133.9	-0.374901	0.215065	-1.74319	0.0813	0.140668
Adat1	712.884	0.0548838	0.0939055	0.584457	0.558913	0.637604
Adat2	335.055	0.451864	0.169263	2.6696	0.00759419	0.0287022
Adck1	4003.22	0.136782	0.169263	0.808103	0.419031	0.507055
Adck2	1060.44	0.218255	0.137159	1.59126	0.111551	0.178621
Adck3	1729.12	0.423283	0.161311	2.62403	0.00868969	0.0310634
Adck4	1317.74	0.118346	0.115839	1.02164	0.30695	0.395648
Adck5	729.119	0.418741	0.196964	2.12598	0.033505	0.0743173
Adcy1	63894.1	0.0799809	0.135222	0.591476	0.554201	0.633189
Adcy10	145.945	-0.506563	0.178936	-2.83098	0.00464058	0.0216369
Adcy2	44559.6	-0.550638	0.0909853	-6.05194	1.43111e-09	2.61566e-06
Adcy3	4424.08	0.524808	0.169514	3.09596	0.00196177	0.0131065
Adcy4	196.207	0.413969	0.149847	2.76262	0.00573401	0.0244292
Adcy5	26197.7	0.686461	0.226438	3.03156	0.00243294	0.0148559
Adcy6	3442.84	0.117129	0.102699	1.1405	0.254077	0.340597
Adcy7	567.976	0.244128	0.130558	1.86989	0.0614996	0.114865
Adcy8	9610.61	-0.475464	0.166778	-2.85089	0.00435971	0.0209142
Adcy9	16809.9	-0.214581	0.126802	-1.69225	0.0905991	0.15306
Adcyap1	1411.3	0.148453	0.0917146	1.61865	0.105524	0.171307
Adcyap1r1	9703.22	0.422049	0.160004	2.63775	0.00834591	0.0302915
Add1	31044.2	0.0590122	0.0499333	1.18182	0.237277	0.322435
Add2	33107.2	0.18728	0.0747266	2.5062	0.0122038	0.0381935
Add3	15977.7	-0.226572	0.0665344	-3.40534	0.000660821	0.00710463
Adgra1	5482.03	0.180396	0.123156	1.46478	0.142981	0.216051
Adgra2	784.921	0.508534	0.183582	2.77006	0.0056046	0.0242027
Adgra3	2367.77	-0.150987	0.0562405	-2.68468	0.00726002	0.0279591
Adgrb1	23481.7	0.482314	0.204937	2.35347	0.0185992	0.0498999
Adgrb2	22298.1	0.659752	0.281325	2.34516	0.0190188	0.0505771
Adgrb3	198354	-0.551208	0.184642	-2.98528	0.00283318	0.0161904
Adgrd1	620.42	0.12925	0.12289	1.05176	0.292911	0.381464
Adgre1	513.145	-0.0463828	0.087965	-0.527287	0.597994	0.671471
Adgre5	850.388	0.112644	0.109906	1.02491	0.305407	0.394008
Adgrf2	277.082	-0.478166	0.226605	-2.11013	0.0348473	0.0764859
Adgrf4	289.341	-0.351912	0.159325	-2.20876	0.027191	0.0641258
Adgrf5	4176.76	-0.26187	0.14445	-1.81288	0.0698503	0.125939
Adgrg1	2522.89	0.581466	0.171885	3.38287	0.00071732	0.00735958
Adgrg6	1281.59	-0.762385	0.17383	-4.3858	1.15563e-05	0.000762118
Adgrl1	43246.8	0.3152	0.177295	1.77783	0.0754319	0.13304
Adgrl2	15398.7	-0.445266	0.103838	-4.2881	1.80209e-05	0.000985294
Adgrl3	118247	-0.409811	0.172905	-2.37015	0.0177808	0.0484153
Adgrl4	3816.86	-0.454164	0.190626	-2.38248	0.0171962	0.0473748
Adgrv1	562.332	-0.0401975	0.181064	-0.222007	0.824309	0.863523
Adh5	2797.06	0.177614	0.105351	1.68593	0.0918098	0.154534
Adhfe1	1454	0.0612349	0.110194	0.555703	0.578414	0.654077
Adi1	1015.54	0.0529479	0.153112	0.345811	0.729485	0.785873
Adipor1	4494.05	0.216647	0.0944641	2.29343	0.0218231	0.0552552
Adipor2	5062.26	0.120126	0.0781725	1.53668	0.124371	0.194176
Adk	14988	-0.474996	0.0993774	-4.77972	1.75538e-06	0.000246794
Adnp2	2856.72	0.207883	0.0924465	2.24868	0.0245328	0.059615
Ado	4394.07	0.190679	0.11365	1.67778	0.0933896	0.156391
Adora1	13854.8	-0.0922256	0.110531	-0.834384	0.404065	0.492907
Adora2a	2481.01	1.00351	0.274651	3.65376	0.00025843	0.00427729
Adpgk	1536.12	-0.012524	0.0585196	-0.214013	0.830537	0.868565
Adprh	2962.26	0.656064	0.203251	3.22784	0.00124728	0.0100111
Adprhl2	1187.17	0.462288	0.215295	2.14723	0.0317749	0.0715719
Adprm	1380.49	-0.0553702	0.0787641	-0.702988	0.482063	0.567493
Adra1a	5153.19	-0.217274	0.114925	-1.89057	0.0586811	0.110946
Adra1b	1291.11	0.00453042	0.153084	0.0295944	0.976391	0.982302
Adra1d	730.744	0.691666	0.310005	2.23114	0.0256717	0.0615064
Adra2a	650.557	0.464496	0.17694	2.62516	0.00866089	0.0310124
Adra2c	1335.7	0.861738	0.256643	3.35772	0.000785872	0.00779613
Adrb1	932.71	0.155976	0.122268	1.27569	0.202064	0.28384
Adrbk1	11593.7	0.388447	0.156317	2.485	0.012955	0.0395859
Adrbk2	11681.9	-0.040934	0.0655573	-0.624401	0.532365	0.614053
Adrm1	2234.46	0.549939	0.163787	3.35765	0.000786073	0.00779613
Adsl	1733.26	0.301618	0.119155	2.5313	0.0113641	0.0366309
Adss	9247.74	-0.303062	0.115111	-2.63278	0.00846902	0.0305736
Adssl1	937.605	0.339616	0.117733	2.88462	0.00391887	0.0195623
Aebp1	632.617	0.7016	0.514327	1.36411	0.172532	0.250045
Aebp2	7064.49	-0.159544	0.0891687	-1.78923	0.0735773	0.130998
Aen	1226.75	0.0743352	0.0763217	0.973971	0.330071	0.419399
Aes	12068.9	0.645155	0.149925	4.30319	1.68358e-05	0.000948887
Afap1	2625.09	-0.00872129	0.0890786	-0.0979055	0.922007	0.941265
Afap1l1	2560.58	-0.265563	0.0946631	-2.80534	0.0050263	0.0226888
Afap1l2	1136.79	-0.118129	0.101631	-1.16234	0.245099	0.331094
Aff1	2279.46	0.0625938	0.0945894	0.661742	0.508136	0.591978
Aff2	11752.6	-0.722167	0.201953	-3.57592	0.000348995	0.0050624
Aff3	20042.5	-0.400414	0.116915	-3.42484	0.000615151	0.00683181
Aff4	29070.7	-0.163571	0.0997723	-1.63945	0.10112	0.166095
Afg3l2	6413.66	-0.0924418	0.0560812	-1.64836	0.0992796	0.164022
Aftph	12783.9	-0.228373	0.0953398	-2.39536	0.0166043	0.0463175
Aga	628.768	-0.218236	0.103468	-2.1092	0.0349271	0.0765983
Agap1	21928	0.0699878	0.126317	0.554065	0.579534	0.654823
Agap2	37742.2	0.717904	0.218425	3.28673	0.00101359	0.00892555
Agap3	8660.03	0.589408	0.203154	2.90129	0.00371628	0.0189214
Agbl1	536.997	-0.632757	0.223663	-2.82906	0.00466849	0.0216911
Agbl3	1396.95	-0.197505	0.19475	-1.01414	0.310514	0.398907
Agbl4	61483.8	-0.780397	0.189881	-4.10993	3.95774e-05	0.001507
Agbl5	753.35	0.149782	0.140704	1.06452	0.287095	0.375341
Agfg1	16447.8	-0.305951	0.0793078	-3.85777	0.000114428	0.00274157
Agfg2	2637.85	0.226063	0.143816	1.57189	0.115976	0.18398
Aggf1	5262.76	-0.0271144	0.104882	-0.258523	0.796003	0.839572
Agk	5426.32	-0.318242	0.111891	-2.84421	0.00445222	0.021151
Agl	4130.59	-0.0972175	0.0871504	-1.11551	0.26463	0.352051
Agmo	2158.95	-0.51056	0.247317	-2.06439	0.0389806	0.0830609
Ago1	4625.36	0.161882	0.0781877	2.07042	0.0384128	0.0821555
Ago2	9051.19	0.340118	0.0999572	3.40263	0.000667395	0.00711554
Ago3	10998.3	-0.381346	0.115473	-3.30248	0.000958339	0.00870017
Ago4	1842.1	-0.173106	0.113501	-1.52516	0.12722	0.197395
Agpat1	7934.94	0.502528	0.196158	2.56185	0.0104117	0.0347799
Agpat3	15624.4	0.201593	0.0944484	2.13443	0.0328079	0.0732282
Agpat4	4552.52	0.111495	0.147542	0.755683	0.449839	0.53687
Agpat5	6446.07	-0.132641	0.0718885	-1.84509	0.0650244	0.119615
Agpat9	494.091	0.172605	0.0984074	1.75398	0.0794333	0.138249
Agps	8859.85	-0.383643	0.116113	-3.30405	0.000952996	0.00866151
Agrn	9989.44	0.375881	0.190733	1.97072	0.0487562	0.0973511
Agrp	129.4	0.211279	0.17078	1.23714	0.216034	0.299647
Agt	534.714	0.654796	0.372995	1.75551	0.0791724	0.137889
Agtpbp1	38933.7	-0.286504	0.116197	-2.46567	0.0136757	0.0410431
Agtrap	519.953	0.469421	0.147954	3.17274	0.00151007	0.011187
Ahctf1	11198.8	-0.239156	0.0999444	-2.39289	0.0167164	0.0465137
Ahcy	1228.54	0.209144	0.0990354	2.11181	0.0347028	0.0762342
Ahcyl1	21986.6	-0.0348233	0.0970472	-0.358828	0.719724	0.777124
Ahcyl2	18780.2	-0.109497	0.0720033	-1.52073	0.128329	0.198818
Ahdc1	5022.74	0.550294	0.215186	2.5573	0.010549	0.0350919
Ahi1	34704	-0.115519	0.143794	-0.803366	0.421763	0.509685
Ahnak	8154.01	0.0980992	0.173743	0.564624	0.57233	0.648918
Ahr	1588.68	-0.365786	0.121197	-3.0181	0.00254362	0.0152394
Ahsa1	6919.93	0.355248	0.133006	2.67092	0.00756436	0.0286496
Ahsa2	2448.86	0.0168117	0.0793566	0.21185	0.832224	0.869963
AI846148	2475.25	0.10329	0.114093	0.905317	0.365298	0.454853
Aida	3869.42	-0.338095	0.169114	-1.99922	0.0455851	0.0929575
Aif1	343.846	-0.0425446	0.113365	-0.37529	0.707445	0.767298
Aif1l	474.545	0.317716	0.156179	2.03431	0.0419204	0.0875926
Aifm1	2779	-0.195808	0.0930316	-2.10474	0.0353136	0.0772708
Aifm2	459.284	0.444464	0.206246	2.15501	0.0311607	0.0705736
Aifm3	5824.48	0.102816	0.204473	0.502836	0.61508	0.687423
Aig1	11687.7	-0.485481	0.0972884	-4.99012	6.0343e-07	0.000134194
Aim2	791.026	-0.24788	0.14769	-1.67838	0.0932733	0.156258
Aimp1	4049.03	-0.140909	0.082516	-1.70766	0.0876995	0.149315
Aimp2	1194.02	0.370027	0.140753	2.62891	0.0085658	0.0307494
Aip	2537.61	0.504379	0.151518	3.32884	0.000872071	0.00834501
Ajap1	6075.99	0.123527	0.125421	0.984892	0.324677	0.413654
Ak1	7344.58	0.390259	0.133201	2.92984	0.00339139	0.0179175
Ak2	1426.3	0.108041	0.0810437	1.33312	0.182493	0.261691
Ak3	6543.99	-0.0753992	0.0891222	-0.846021	0.397541	0.486433
Ak4	2485.41	0.129878	0.162803	0.797764	0.425008	0.512928
Ak5	13831	-0.412791	0.100286	-4.11612	3.85296e-05	0.00148478
Ak6	1587.02	-0.0115797	0.120024	-0.0964776	0.923141	0.94199
Ak8	196.16	-0.123279	0.16388	-0.752248	0.451902	0.538754
Akain1	434.305	-0.173229	0.0856788	-2.02184	0.0431929	0.0894625
Akap1	3819.94	0.202238	0.132775	1.52316	0.127718	0.198063
Akap10	6635.26	-0.310908	0.0779448	-3.98882	6.6402e-05	0.00195733
Akap11	42490.9	-0.238401	0.121823	-1.95695	0.0503536	0.0997252
Akap12	3728.4	-0.343898	0.228661	-1.50397	0.13259	0.203841
Akap13	7031.24	-0.194473	0.0760886	-2.55587	0.0105922	0.0351899
Akap17b	5167.93	-0.557079	0.171564	-3.24707	0.00116601	0.00957506
Akap5	19093.1	-0.348342	0.204647	-1.70216	0.0887251	0.15053
Akap6	78574.4	-0.345479	0.0997612	-3.46306	0.000534066	0.00634161
Akap7	7075.57	-0.462149	0.156249	-2.95778	0.00309864	0.0169477
Akap8	8387.75	-0.220238	0.0951234	-2.31529	0.0205973	0.0533665
Akap8l	10678	-0.0372649	0.086973	-0.428465	0.668313	0.735012
Akap9	29383.1	-0.30029	0.201894	-1.48736	0.136919	0.208939
Akip1	186.642	0.393585	0.167709	2.34683	0.018934	0.0504459
Akirin1	4667.76	-0.0961903	0.0803673	-1.19688	0.231352	0.316496
Akirin2	4082.97	-0.0785352	0.0768725	-1.02163	0.306957	0.395648
Akna	379.598	0.212229	0.131521	1.61365	0.106604	0.172642
Akr1a1	14674.7	0.352571	0.171306	2.05813	0.0395773	0.0839267
Akr1b10	878.026	-0.145361	0.0924414	-1.57246	0.115844	0.183838
Akr1b3	1836.96	0.170071	0.112294	1.51452	0.129895	0.20054
Akr1c14	170.593	-0.493261	0.199415	-2.47353	0.0133785	0.0403975
Akr1e1	2327.69	-0.195061	0.0805069	-2.42291	0.0153967	0.0441878
Akr7a5	862.95	0.419282	0.147274	2.84696	0.00441391	0.0210401
Akt1	6554.07	0.36985	0.106408	3.47578	0.000509372	0.00617226
Akt1s1	1646.87	0.758567	0.364702	2.07996	0.037529	0.0806968
Akt2	7343.72	0.273065	0.134005	2.03773	0.0415774	0.0871463
Akt3	66058.1	-0.53232	0.149464	-3.56154	0.000368693	0.0051895
Aktip	8924.91	-0.0261566	0.0585026	-0.447102	0.654802	0.72245
AL365322.1	517.26	-0.106084	0.126561	-0.838206	0.401915	0.490799
Alad	1175.43	0.404688	0.13314	3.03957	0.00236919	0.0146291
Alas1	4637.17	0.127828	0.0705888	1.81088	0.0701596	0.126275
Alas2	246.022	0.244699	0.115467	2.1192	0.0340734	0.0752139
Alcam	48877.9	-0.159759	0.16178	-0.987509	0.323393	0.412553
Aldh16a1	407.544	0.553173	0.252394	2.19171	0.0284007	0.0660561
Aldh18a1	2308.13	0.150468	0.0882424	1.70516	0.088164	0.149856
Aldh1a1	3355.04	-0.287949	0.164702	-1.7483	0.0804119	0.139497
Aldh1a2	435.107	0.647247	0.579038	1.1178	0.263653	0.350965
Aldh1b1	604.211	0.491942	0.263576	1.86641	0.0619838	0.115533
Aldh1l1	4509.63	0.300315	0.0718517	4.17965	2.91953e-05	0.00126053
Aldh1l2	569.223	-0.1523	0.112508	-1.35368	0.175839	0.253771
Aldh2	3247.96	0.723686	0.191097	3.78701	0.000152473	0.00312119
Aldh3a2	3615.57	0.164861	0.0748241	2.20331	0.0275727	0.0647259
Aldh3b1	263.904	0.392877	0.146356	2.68439	0.00726621	0.0279591
Aldh5a1	6953.24	0.139293	0.0692786	2.01062	0.0443657	0.091271
Aldh6a1	4743.25	-0.2657	0.140686	-1.8886	0.0589461	0.111336
Aldh7a1	5511.12	0.188524	0.0659196	2.8599	0.0042377	0.0205836
Aldh9a1	1144.99	0.138605	0.0926855	1.49543	0.134802	0.20645
Aldoa	89521.8	0.347989	0.115099	3.02339	0.00249957	0.0150663
Aldob	260.513	-1.01317	0.322057	-3.14595	0.00165548	0.0118259
Aldoc	41789.8	0.253204	0.130751	1.93653	0.0528026	0.103154
Alg1	1448.31	0.513705	0.166288	3.08924	0.00200669	0.0132817
Alg10b	5448.81	-0.0448929	0.0927112	-0.484223	0.628227	0.698795
Alg11	3979.53	-0.13006	0.103694	-1.25427	0.209745	0.292989
Alg12	1225.92	0.110448	0.0890972	1.23964	0.215109	0.298725
Alg13	1868.45	-0.534989	0.144123	-3.71204	0.000205592	0.0037257
Alg14	1096.69	-0.200974	0.0879645	-2.28472	0.0223295	0.0559862
Alg2	7638.9	0.177483	0.0844676	2.1012	0.0356235	0.077684
Alg3	507.194	0.238094	0.0939895	2.5332	0.0113027	0.0365517
Alg5	932.91	0.0082568	0.102077	0.0808877	0.935531	0.951824
Alg6	2043.38	-0.351413	0.136917	-2.56662	0.0102695	0.034503
Alg8	724.479	-0.0881585	0.0618165	-1.42613	0.15383	0.22877
Alg9	1978.02	-0.0202833	0.0726307	-0.279266	0.780041	0.827036
Alk	4573.91	-0.186657	0.189515	-0.98492	0.324664	0.413654
Alkbh1	2366.83	-0.179599	0.0931552	-1.92795	0.0538613	0.104504
Alkbh2	288.191	0.242754	0.139855	1.73575	0.0826073	0.142456
Alkbh3	1487.44	-0.109986	0.079671	-1.3805	0.167434	0.244398
Alkbh4	419.385	0.431138	0.225485	1.91205	0.0558699	0.10707
Alkbh5	4168.77	0.225306	0.0888958	2.53449	0.011261	0.0364375
Alkbh6	1384.96	0.461395	0.195066	2.36533	0.0180139	0.0487973
Alkbh7	549.757	1.05132	0.351156	2.99389	0.00275441	0.0159071
Alkbh8	6446.56	-0.309334	0.151373	-2.04352	0.0410009	0.0862206
Alms1	5379.06	-0.468106	0.150459	-3.11119	0.00186335	0.0126739
Alox12b	296.943	0.0457027	0.171444	0.266575	0.789796	0.834879
Alox5ap	178.827	0.539653	0.17107	3.15457	0.00160733	0.0115738
Alox8	272.36	-0.121688	0.155417	-0.782978	0.43364	0.521347
Aloxe3	247.19	0.42137	0.1958	2.15204	0.0313943	0.0709583
Alpk1	658.448	-0.403699	0.123788	-3.26122	0.00110935	0.00934369
Alpl	499.02	-0.083699	0.152845	-0.547607	0.583961	0.65843
Als2	4668.3	0.0897652	0.0523249	1.71554	0.0862468	0.147409
Als2cl	530.839	0.191476	0.158266	1.20984	0.226341	0.311209
Alyref	2113.02	0.120842	0.0759059	1.592	0.111384	0.178466
Alyref2	217.957	0.284051	0.169691	1.67393	0.0941438	0.157161
Amacr	627.188	0.307768	0.134277	2.29204	0.0219031	0.055352
Ambra1	12178.9	-0.265299	0.100485	-2.64019	0.00828607	0.0301599
Amd1	7077.25	-0.0265714	0.0724459	-0.366775	0.713787	0.772744
Amdhd2	1098.62	0.372633	0.154904	2.40558	0.0161469	0.0456034
Amer1	1143.53	0.0307233	0.0753847	0.407553	0.683602	0.748033
Amer2	5586.48	-0.0994682	0.108551	-0.916331	0.359493	0.448761
Amer3	2878.01	0.0708351	0.0917242	0.772261	0.43996	0.526996
Amfr	10275.5	0.347827	0.13108	2.65355	0.00796491	0.0295114
Amigo1	5673.54	0.207489	0.125763	1.64984	0.098976	0.163668
Amigo2	492.17	0.361724	0.146186	2.47441	0.0133457	0.0403367
Ammecr1	3840.26	-0.432071	0.134266	-3.21803	0.00129073	0.0101935
Ammecr1l	2930.27	-0.170916	0.118277	-1.44505	0.148443	0.222205
Amn1	2804.92	-0.350771	0.136272	-2.57405	0.0100515	0.034048
Amot	2359.8	0.140832	0.0556478	2.53077	0.0113811	0.0366405
Amotl1	3120.88	0.504607	0.129403	3.89951	9.63876e-05	0.00245166
Amotl2	1261.86	0.574212	0.170845	3.36101	0.000776585	0.00771999
Ampd2	3245.76	0.604702	0.188351	3.21051	0.001325	0.0103873
Ampd3	1983.62	0.203868	0.0932367	2.18656	0.0287743	0.0665471
Amph	30255.6	-0.301568	0.0656324	-4.5948	4.33157e-06	0.000436158
Amt	1363.78	0.198798	0.109204	1.82043	0.0686939	0.124503
Amy1	4864.36	-0.429744	0.251138	-1.71119	0.0870464	0.148489
Amz1	1092.73	0.48412	0.159699	3.03145	0.0024338	0.0148559
Amz2	3640.98	0.219272	0.0951208	2.30519	0.0211558	0.0543073
Anapc1	12435.7	-0.061542	0.0475542	-1.29414	0.195616	0.276499
Anapc10	3716.94	-0.607006	0.151258	-4.01306	5.99371e-05	0.00188412
Anapc11	1872.67	0.651218	0.177475	3.66936	0.000243162	0.00414802
Anapc13	1141.36	0.0813149	0.146646	0.554498	0.579238	0.654604
Anapc15	1457.52	0.178936	0.125558	1.42512	0.154122	0.229043
Anapc16	2837.97	0.228121	0.087861	2.59638	0.00942115	0.0326732
Anapc2	2750.1	0.392017	0.158961	2.46612	0.0136585	0.0410205
Anapc4	5712.45	-0.0660836	0.0616853	-1.0713	0.284033	0.372176
Anapc5	13860.1	0.0814962	0.0515268	1.58163	0.113735	0.181233
Anapc7	2242.07	0.222452	0.139025	1.60008	0.10958	0.176304
Angel1	520.345	0.0342549	0.0989511	0.34618	0.729207	0.785706
Angel2	5024.49	-0.0761008	0.0471624	-1.61359	0.106616	0.172642
Angpt1	1968.61	-0.494278	0.239469	-2.06406	0.0390119	0.0830895
Angptl2	282.546	0.155509	0.261677	0.59428	0.552325	0.63171
Angptl6	580.212	0.415585	0.174551	2.38088	0.0172711	0.0475186
Ank	17065.6	-0.012846	0.0642649	-0.199891	0.841566	0.877579
Ank1	6400.68	0.0864112	0.0911154	0.948371	0.342941	0.432402
Ank2	187723	-0.356676	0.109671	-3.25225	0.00114497	0.00948749
Ank3	99502.4	-0.287551	0.115856	-2.48197	0.0130658	0.0397724
Ankdd1a	275.444	0.405931	0.183355	2.21391	0.0268348	0.0634773
Ankef1	363.242	-0.288269	0.186994	-1.54159	0.123173	0.192618
Ankfn1	2112.11	-0.325613	0.194852	-1.67108	0.0947064	0.157949
Ankfy1	8816.13	-0.0753097	0.050233	-1.49921	0.13382	0.205262
Ankhd1	17425.4	-0.453921	0.164282	-2.76307	0.00572612	0.0244292
Ankib1	17553.5	-0.369114	0.137225	-2.68985	0.00714852	0.0276392
Ankle2	6054.02	-0.281716	0.115442	-2.44033	0.0146739	0.0429166
Ankmy2	4692.64	-0.18808	0.0787744	-2.38758	0.0169596	0.046935
Ankra2	3155.04	-0.1472	0.107666	-1.36719	0.171565	0.248866
Ankrd10	7209.19	-0.120082	0.0994035	-1.20802	0.227038	0.311867
Ankrd11	29545.3	-0.278482	0.142772	-1.95053	0.0511129	0.100745
Ankrd12	43539.2	-0.434358	0.449826	-0.965614	0.334237	0.423809
Ankrd13a	3042.88	0.103631	0.0656168	1.57933	0.11426	0.181912
Ankrd13b	2762.59	0.494271	0.17221	2.87017	0.00410256	0.0201645
Ankrd13c	9196.61	-0.301418	0.118088	-2.55248	0.0106959	0.0353884
Ankrd13d	3423.22	0.276984	0.141795	1.95342	0.0507699	0.10027
Ankrd16	2422.18	-0.0561324	0.0448156	-1.25252	0.21038	0.293491
Ankrd17	41023.8	-0.350664	0.13362	-2.62435	0.00868151	0.0310433
Ankrd24	2053.55	-0.0327745	0.0989389	-0.33126	0.740448	0.794254
Ankrd26	3864.55	-0.387535	0.159933	-2.42312	0.015388	0.0441817
Ankrd27	2886.21	-0.0843197	0.070941	-1.18859	0.234601	0.319975
Ankrd28	18443.5	-0.392748	0.0984629	-3.98879	6.64124e-05	0.00195733
Ankrd29	2254.74	-0.263059	0.164637	-1.59781	0.110085	0.176916
Ankrd33b	12761.4	-0.0401565	0.106934	-0.375526	0.707269	0.767277
Ankrd34a	2482.71	0.275804	0.12157	2.26869	0.0232872	0.0576727
Ankrd34b	1570.15	0.202177	0.0936588	2.15866	0.0308769	0.0701449
Ankrd34c	2215.32	-0.475886	0.153621	-3.09779	0.00194966	0.0130528
Ankrd35	784.303	0.33813	0.123279	2.7428	0.00609186	0.0252706
Ankrd37	352.978	0.343892	0.142896	2.4066	0.016102	0.0455168
Ankrd39	209.142	0.536665	0.253658	2.1157	0.0343703	0.0757117
Ankrd40	8227.72	-0.043814	0.0607728	-0.720948	0.470942	0.556963
Ankrd42	4497.66	-0.556235	0.192523	-2.88918	0.00386243	0.0193758
Ankrd44	3557.69	-0.374146	0.109262	-3.42431	0.000616371	0.0068335
Ankrd45	6049.66	-0.154403	0.0643177	-2.40063	0.016367	0.0459209
Ankrd46	8465.23	0.252019	0.14759	1.70757	0.087717	0.149315
Ankrd49	1416.73	-0.393606	0.178705	-2.20255	0.0276264	0.064776
Ankrd50	6815.8	0.275326	0.0854052	3.22376	0.00126518	0.0100766
Ankrd52	3683.26	0.473695	0.142505	3.32406	0.000887161	0.00841223
Ankrd54	648.131	0.590889	0.193432	3.05476	0.00225244	0.0142239
Ankrd55	603.821	0.150165	0.183564	0.818054	0.413326	0.501574
Ankrd6	3867.19	0.255051	0.106913	2.3856	0.0170515	0.0471282
Ankrd63	2418.62	0.885085	0.179178	4.93969	7.82458e-07	0.000158901
Ankrd9	562.18	0.693967	0.306696	2.26272	0.0236528	0.0582958
Anks1	4046.49	0.128827	0.200872	0.64134	0.521302	0.60418
Anks1b	128081	-0.398829	0.148722	-2.6817	0.0073249	0.0281004
Anks3	4356.33	0.0986015	0.101406	0.972343	0.33088	0.420343
Anks6	1364.08	0.166318	0.163427	1.01769	0.308823	0.397254
Ankub1	279.267	-0.267588	0.206784	-1.29404	0.19565	0.276499
Ankzf1	1765.42	0.0574007	0.114351	0.50197	0.615689	0.687838
Anln	2780.7	-0.0257915	0.162438	-0.158778	0.873844	0.90292
Ano1	532.726	0.165176	0.177238	0.931946	0.351364	0.441024
Ano10	2620.22	-0.182076	0.0823996	-2.20968	0.0271276	0.0640233
Ano2	1082.5	0.248162	0.243097	1.02084	0.307332	0.395947
Ano3	49899.7	-0.526967	0.208317	-2.52964	0.0114181	0.0366951
Ano4	19604.1	-0.542588	0.145765	-3.72234	0.000197388	0.00362322
Ano5	524.459	-0.0526956	0.252892	-0.208372	0.834938	0.872159
Ano6	5205.03	-0.111356	0.10631	-1.04747	0.294884	0.383401
Ano8	3250.72	0.534985	0.239054	2.23793	0.0252259	0.0607796
Anp32a	17371	-0.359588	0.245699	-1.46353	0.143322	0.216464
Anp32b	1839.47	-0.216558	0.201469	-1.0749	0.282421	0.37048
Anp32e	4949.25	0.0400365	0.143665	0.278679	0.780491	0.827308
Antxr1	3662.88	-0.304315	0.121016	-2.51466	0.0119147	0.037611
Antxr2	475.675	-0.312993	0.201238	-1.55534	0.119865	0.188699
Anxa11	1068.52	0.361745	0.242368	1.49254	0.135557	0.207355
Anxa2	568.102	0.785434	0.241818	3.24804	0.00116201	0.00956983
Anxa3	1009.33	0.0896886	0.0952761	0.941354	0.346523	0.436231
Anxa4	296.991	-0.151146	0.170503	-0.886476	0.375361	0.464042
Anxa5	3876.07	-0.339129	0.180655	-1.87722	0.0604885	0.113457
Anxa6	8578.32	-0.006323	0.0797327	-0.0793025	0.936792	0.952855
Anxa7	6989.91	-0.085985	0.0542218	-1.5858	0.112784	0.180167
Aoc2	241.024	0.553605	0.189495	2.92148	0.00348373	0.018181
Aox1	883.267	0.132504	0.12354	1.07256	0.283469	0.371588
Aox3	361.931	-0.354707	0.502017	-0.706563	0.479838	0.565185
Aox4	144.31	-0.217193	0.144148	-1.50673	0.13188	0.20287
Ap1ar	6820.9	-0.22513	0.10306	-2.18447	0.028928	0.0667698
Ap1b1	13075.4	0.282199	0.10701	2.63713	0.00836105	0.0303379
Ap1g1	12528	-0.1108	0.0513873	-2.15618	0.0310698	0.0704402
Ap1g2	197.558	0.29727	0.186518	1.59379	0.110984	0.177946
Ap1m1	3609.4	0.306588	0.112846	2.71688	0.00659012	0.0264467
Ap1m2	118.221	0.109331	0.136822	0.799078	0.424245	0.512201
Ap1s1	5866.11	0.931008	0.258453	3.60224	0.000315491	0.00478723
Ap1s2	4326.64	-0.133711	0.191121	-0.699615	0.484168	0.569494
Ap1s3	375.682	-0.288138	0.110259	-2.61329	0.00896739	0.0316574
Ap2a1	14940.6	0.636997	0.224268	2.84034	0.00450659	0.0213281
Ap2a2	19516.3	0.407386	0.139578	2.91869	0.00351503	0.0182794
Ap2b1	31113	0.220253	0.0749587	2.93833	0.00329986	0.0176572
Ap2m1	20923.6	0.216918	0.147278	1.47284	0.140793	0.213349
Ap2s1	6134.89	0.801564	0.325623	2.46163	0.0138307	0.0413532
Ap3b1	10126.4	-0.265007	0.0692332	-3.82774	0.000129323	0.00290784
Ap3b2	11679.5	0.230008	0.0752166	3.05794	0.00222866	0.0141436
Ap3d1	15903.7	0.291702	0.0969587	3.00851	0.00262528	0.0154943
Ap3m1	5317.2	-0.226331	0.0990031	-2.2861	0.0222484	0.0558788
Ap3m2	9977.33	-0.0508064	0.0844066	-0.601924	0.547224	0.627122
Ap3s1	8845.27	-0.541484	0.193108	-2.80404	0.0050466	0.0227266
Ap3s2	3605.35	0.229359	0.119953	1.91207	0.0558671	0.10707
Ap4e1	2471.83	-0.18792	0.100636	-1.86733	0.0618557	0.115362
Ap4m1	1386.1	0.424185	0.141969	2.98788	0.00280922	0.0160955
Ap4s1	3807.96	-0.0372009	0.0959177	-0.387842	0.698133	0.75971
Ap5b1	258.712	0.856302	0.31393	2.72768	0.00637812	0.0258888
Ap5m1	4292.88	-0.269895	0.106042	-2.54517	0.0109226	0.0358814
Ap5s1	776.796	0.311281	0.223359	1.39364	0.163428	0.239699
Ap5z1	1201.49	0.563903	0.194861	2.89387	0.00380522	0.0192351
Apaf1	1655.47	0.0348035	0.0943487	0.368882	0.712216	0.771361
Apba1	22392.7	-0.203412	0.0699937	-2.90615	0.00365911	0.0187602
Apba2	30496.7	-0.192528	0.101805	-1.89115	0.0586038	0.110881
Apba3	782.632	0.71234	0.314881	2.26225	0.0236819	0.0583526
Apbb1	22262.4	0.419402	0.218889	1.91605	0.0553587	0.106489
Apbb1ip	873.417	-0.613945	0.203058	-3.0235	0.00249872	0.0150663
Apbb2	15917.2	-0.332094	0.0984201	-3.37425	0.000740165	0.00749684
Apc	71982.2	-0.503623	0.187872	-2.68068	0.00734735	0.0281443
Apc2	8826.33	0.7992	0.25454	3.13979	0.00169072	0.0119839
Apcdd1	1433.8	-0.0857056	0.110747	-0.773885	0.438999	0.52619
Apeh	769.115	0.53192	0.150984	3.52302	0.000426665	0.00555943
Apex1	2243.71	0.113824	0.0778826	1.46148	0.143884	0.217133
Apex2	7192.52	-0.447054	0.143747	-3.11	0.00187085	0.0127115
Aph1a	1152.24	0.529547	0.18106	2.9247	0.00344791	0.0181086
Aph1b	3176.51	-0.209766	0.12232	-1.7149	0.0863636	0.147552
Aph1c	945.568	-0.103938	0.067166	-1.54747	0.121749	0.191119
Api5	8355.33	-0.00721114	0.0748434	-0.0963497	0.923243	0.941992
Apip	1537.03	-0.160039	0.0898931	-1.78033	0.0750226	0.132586
Apitd1	140.119	0.150096	0.134696	1.11433	0.265139	0.352582
Aplf	892.688	-0.196102	0.123455	-1.58845	0.112185	0.179457
Apln	1783.51	-0.0531286	0.160412	-0.331201	0.740492	0.794254
Aplp1	37403	0.34611	0.10072	3.43635	0.000589606	0.0066638
Aplp2	39631	-0.046069	0.101755	-0.452744	0.650733	0.719202
Apmap	3391.48	0.0797477	0.104315	0.764493	0.444573	0.531785
Apoa1bp	2165.7	0.213801	0.110721	1.93099	0.0534842	0.104004
Apobec1	233.058	-0.260895	0.191517	-1.36225	0.173119	0.250665
Apobec3	178.458	0.0283916	0.217309	0.130651	0.896051	0.921131
Apod	8517.05	0.0462173	0.157623	0.293213	0.769359	0.818244
Apoe	63926.3	0.396849	0.142362	2.78761	0.00530989	0.0234177
Apol8	325.155	0.161483	0.15175	1.06414	0.287267	0.37549
Apold1	355.051	0.231293	0.131427	1.75986	0.0784322	0.136861
Apoo	3603.26	-0.394901	0.130903	-3.01675	0.002555	0.0152394
Apool	901.646	-0.348121	0.239435	-1.45393	0.145966	0.219395
Apopt1	1922.87	0.0839572	0.0951678	0.882202	0.377668	0.466218
App	113672	0.0226026	0.0826538	0.273461	0.784499	0.83073
Appbp2	11690.6	-0.198323	0.0741495	-2.67463	0.00748107	0.0284605
Appl1	18297.5	-0.372865	0.144934	-2.57265	0.0100922	0.0341136
Appl2	7977.2	-0.252682	0.106417	-2.37445	0.0175749	0.048022
Aprt	1012.6	0.378516	0.22167	1.70757	0.087717	0.149315
Aptx	2253.52	0.121833	0.0842313	1.44641	0.148064	0.221766
Aqp11	902.252	0.0506465	0.101013	0.501385	0.616101	0.688178
Aqp4	8948.66	-0.385991	0.224569	-1.71881	0.0856489	0.146575
Aqr	7476.36	-0.15996	0.0851587	-1.87838	0.0603291	0.113287
Ar	5421.76	-0.416726	0.119983	-3.47321	0.000514281	0.00619559
Araf	10031.5	0.149778	0.0991488	1.51064	0.130881	0.201781
Arap1	1173.56	0.290469	0.195604	1.48499	0.137547	0.209631
Arap2	29906.3	-0.538289	0.156676	-3.43568	0.000591059	0.00666695
Arap3	507.588	0.15938	0.140748	1.13238	0.257473	0.344284
Arc	3998.74	0.268651	0.238762	1.12518	0.260512	0.347548
Arcn1	12568.6	-0.358422	0.196753	-1.82168	0.0685036	0.124229
Arel1	16386.2	0.149257	0.0736446	2.02671	0.0426916	0.0886539
Arf1	17713.2	0.299746	0.11419	2.62497	0.00866572	0.0310211
Arf2	3465	0.216833	0.131995	1.64274	0.100437	0.165323
Arf3	37216.8	0.4743	0.159008	2.98287	0.00285557	0.0162158
Arf4	5847.04	0.0972937	0.0746698	1.30299	0.19258	0.273156
Arf5	3536.66	0.590578	0.195312	3.02377	0.00249649	0.0150663
Arf6	1529.16	0.391119	0.148653	2.63109	0.00851114	0.0306392
Arfgap1	6976.24	0.188025	0.132171	1.42259	0.154856	0.230054
Arfgap2	3185.84	0.516718	0.152282	3.39317	0.000690883	0.00725115
Arfgap3	1829.48	-0.211755	0.082097	-2.57933	0.00989934	0.0336931
Arfgef1	20379.6	-0.332344	0.119557	-2.7798	0.00543924	0.0237265
Arfgef2	9948.01	-0.00566142	0.0423765	-0.133598	0.89372	0.919596
Arfgef3	38878.5	-0.377878	0.102014	-3.70419	0.00021207	0.00378715
Arfip1	156.094	0.154136	0.162478	0.948655	0.342796	0.432389
Arfip2	4759	0.306005	0.0945832	3.2353	0.00121515	0.009821
Arfrp1	1461.09	0.476746	0.153692	3.10195	0.00192251	0.0129592
Arg2	341.154	0.0874329	0.180843	0.483475	0.628758	0.699325
Arglu1	17696.8	-0.344426	0.176222	-1.9545	0.0506418	0.10011
Arhgap1	6097.31	0.0939594	0.0838645	1.12037	0.262555	0.349596
Arhgap10	10472.8	-0.235349	0.11937	-1.9716	0.0486555	0.097202
Arhgap11a	245.313	-0.568679	0.277353	-2.05038	0.0403274	0.0851823
Arhgap12	7083.3	-0.259288	0.112993	-2.29472	0.0217491	0.0551481
Arhgap15	6334.24	-0.613217	0.193494	-3.16918	0.00152871	0.0112404
Arhgap17	2932.88	-0.161757	0.12805	-1.26323	0.206506	0.289158
Arhgap18	3591.44	-0.183262	0.149123	-1.22893	0.219099	0.303208
Arhgap19	451.55	0.0415479	0.0870874	0.477083	0.633303	0.703341
Arhgap20	19270.1	-0.429613	0.134762	-3.18793	0.00143294	0.0108343
Arhgap21	23313.9	-0.284051	0.0824623	-3.44462	0.000571858	0.00657354
Arhgap22	1523.22	-0.282311	0.157864	-1.78832	0.0737243	0.131186
Arhgap23	7370.9	0.257399	0.137092	1.87757	0.0604398	0.113431
Arhgap24	1607.43	-0.160668	0.153891	-1.04404	0.296468	0.385078
Arhgap25	1510.97	-0.323459	0.169247	-1.91116	0.0559835	0.107182
Arhgap26	35002	-0.181084	0.0940905	-1.92457	0.0542829	0.104956
Arhgap27	894.496	0.358161	0.143591	2.4943	0.0126204	0.0390013
Arhgap29	4927.64	-0.404259	0.150912	-2.67876	0.00738947	0.0282718
Arhgap30	312.484	-0.0316914	0.196564	-0.161227	0.871915	0.901504
Arhgap31	3588.9	0.0938093	0.0907554	1.03365	0.3013	0.389968
Arhgap32	59079.4	-0.219531	0.0476651	-4.6057	4.11077e-06	0.000427587
Arhgap33	3459.31	0.761955	0.216748	3.5154	0.000439093	0.00565166
Arhgap35	26626.9	-0.134197	0.0762126	-1.76082	0.0782681	0.13663
Arhgap39	8345	-0.0157817	0.106357	-0.148384	0.88204	0.910023
Arhgap4	280.709	0.253456	0.128176	1.9774	0.0479964	0.0961884
Arhgap42	7427.51	-0.555511	0.145349	-3.8219	0.000132426	0.00293631
Arhgap44	18664.5	-0.104054	0.089972	-1.15652	0.247469	0.333662
Arhgap45	333.046	0.387497	0.15395	2.51703	0.0118347	0.0374421
Arhgap5	36340.2	-0.629859	0.203673	-3.09251	0.00198475	0.0131949
Arhgap6	4514.56	-0.0527232	0.18731	-0.281475	0.778346	0.825923
Arhgdia	8555.61	0.615555	0.169833	3.62446	0.000289564	0.0045745
Arhgdib	576.406	0.186131	0.209256	0.889492	0.373739	0.462617
Arhgdig	1916.49	0.514056	0.21154	2.43006	0.0150962	0.043707
Arhgef1	1465.08	0.304268	0.156443	1.94492	0.0517849	0.101632
Arhgef10	4729.09	0.186559	0.0828623	2.25144	0.0243579	0.059346
Arhgef10l	3932.9	0.378453	0.170911	2.21432	0.0268066	0.0634295
Arhgef11	11920	-0.0952136	0.091486	-1.04075	0.297994	0.386588
Arhgef12	33794	-0.185338	0.0686492	-2.69978	0.00693854	0.0271857
Arhgef15	1167.21	0.0843695	0.100284	0.841307	0.400176	0.488943
Arhgef17	15485.6	0.273764	0.104952	2.60846	0.00909496	0.0319306
Arhgef18	5061.51	0.192093	0.103573	1.85467	0.0636431	0.117641
Arhgef19	381.083	0.818987	0.224506	3.64795	0.000264341	0.00433587
Arhgef2	11792.7	0.114646	0.0929448	1.23348	0.217397	0.301243
Arhgef25	7567.65	0.0874264	0.116913	0.747791	0.454586	0.541273
Arhgef26	2798.61	-0.0935092	0.0865373	-1.08057	0.279891	0.367878
Arhgef28	5825.33	0.0187373	0.0894651	0.209437	0.834107	0.871457
Arhgef3	9134.22	-0.246143	0.0685234	-3.59211	0.000328016	0.00489118
Arhgef33	431.959	0.152184	0.171843	0.8856	0.375833	0.464546
Arhgef37	902.184	1.46768	0.554127	2.64864	0.00808167	0.029764
Arhgef4	14999.4	0.27438	0.131045	2.09378	0.0362798	0.0787118
Arhgef40	1405.64	0.437564	0.124315	3.51979	0.000431881	0.00558694
Arhgef5	263.416	-0.248145	0.265739	-0.933794	0.35041	0.440085
Arhgef6	1555.07	-0.187723	0.142336	-1.31888	0.18721	0.267227
Arhgef7	11770.5	0.226973	0.108868	2.08485	0.0370829	0.0799795
Arhgef9	47585	-0.296646	0.112008	-2.64843	0.00808656	0.029764
Arid1a	9310.61	0.0479444	0.105468	0.454588	0.649406	0.718045
Arid1b	23661.6	-0.213412	0.135809	-1.57141	0.116088	0.184111
Arid2	8390.85	-0.273671	0.0968656	-2.82527	0.0047241	0.0218274
Arid3a	761.022	0.186904	0.118612	1.57576	0.115081	0.182818
Arid3b	941.518	-0.200737	0.119771	-1.676	0.0937381	0.156728
Arid4a	8465.89	-0.546544	0.215203	-2.53967	0.0110957	0.0361403
Arid4b	14817.1	-0.539597	0.17431	-3.09561	0.0019641	0.013115
Arid5a	485.874	0.495002	0.1811	2.73331	0.00627008	0.0256867
Arid5b	8943.92	-0.4076	0.118447	-3.44121	0.000579114	0.00660944
Arih1	18101.2	-0.319286	0.0928549	-3.43854	0.000584853	0.00664469
Arih2	5513.71	-0.0161509	0.0619518	-0.260701	0.794323	0.838361
Arl1	9749.55	-0.0603809	0.108502	-0.556495	0.577873	0.653696
Arl10	505.969	0.435065	0.233422	1.86386	0.062342	0.116049
Arl13b	3163.58	-0.404855	0.147801	-2.73919	0.006159	0.0254188
Arl14ep	3529.23	0.0593206	0.07243	0.819006	0.412783	0.501066
Arl15	19547.8	-0.469847	0.129528	-3.62737	0.000286324	0.00455059
Arl16	1122.08	0.0402798	0.112941	0.356646	0.721357	0.778427
Arl2	2300.53	0.45638	0.109843	4.15485	3.25504e-05	0.0013579
Arl2bp	5914.67	0.369233	0.126374	2.92175	0.00348067	0.018181
Arl3	5403.8	-0.00618331	0.115741	-0.0534235	0.957394	0.969289
Arl4a	5202.68	-0.350724	0.147785	-2.37321	0.0176343	0.048095
Arl4c	3219.47	0.00364449	0.0786611	0.0463315	0.963046	0.973714
Arl4d	742.47	0.657042	0.270244	2.43129	0.015045	0.0436279
Arl5a	9488.47	-0.155765	0.085375	-1.82448	0.0680794	0.123705
Arl5b	2901.32	-0.255408	0.070608	-3.61726	0.000297734	0.0046413
Arl6	3159.16	-0.292301	0.164823	-1.77343	0.0761581	0.13386
Arl6ip1	13896	0.232343	0.128823	1.80358	0.0712966	0.127844
Arl6ip4	1799.28	0.236691	0.148126	1.5979	0.110065	0.176906
Arl6ip5	5725.43	-0.00763932	0.10129	-0.0754205	0.93988	0.955641
Arl6ip6	1557.07	-0.388253	0.155839	-2.49138	0.0127248	0.039164
Arl8a	7010.29	-0.00363104	0.119748	-0.0303224	0.97581	0.98195
Arl8b	19647.1	-0.374115	0.162659	-2.3	0.0214483	0.0547179
Armc1	5891.47	-0.0112048	0.0830691	-0.134885	0.892703	0.918817
Armc10	1713.3	-0.199053	0.0992125	-2.00633	0.0448208	0.0919117
Armc2	1450.14	-0.277317	0.111691	-2.48289	0.0130322	0.0397459
Armc4	223.878	-0.361564	0.241156	-1.4993	0.133797	0.205258
Armc5	705.32	0.701899	0.264778	2.6509	0.00802777	0.0296834
Armc6	1680.57	0.583488	0.28876	2.02067	0.0433142	0.089598
Armc7	506.976	0.303624	0.163048	1.86217	0.0625786	0.11632
Armc8	12439.6	-0.289826	0.0894041	-3.24175	0.00118796	0.00968077
Armc9	5341.55	-0.0671081	0.0774197	-0.866809	0.386047	0.474729
Armcx1	5303.93	-0.120219	0.0795903	-1.51047	0.130923	0.201781
Armcx2	6285.07	-0.0469561	0.0766126	-0.612903	0.53994	0.621111
Armcx3	4890.86	-0.0818138	0.0810098	-1.00992	0.312532	0.401282
Armcx4	5529.76	0.093549	0.120171	0.778465	0.436295	0.523587
Armcx6	207.147	0.102985	0.143185	0.719246	0.471989	0.557944
Armt1	1621.73	0.0502083	0.0847389	0.592507	0.553511	0.63274
Arnt	6374.22	-0.345508	0.0857644	-4.02857	5.61164e-05	0.00182115
Arnt2	28786.8	-0.0416734	0.0640547	-0.65059	0.515311	0.5987
Arntl	6731.01	-0.243664	0.0845017	-2.88354	0.00393237	0.019599
Arntl2	2003.36	-0.340582	0.104686	-3.25336	0.00114047	0.00946254
Arpc1a	8162.01	0.563306	0.159855	3.52386	0.000425313	0.00555943
Arpc1b	886.144	0.484401	0.137543	3.52182	0.000428595	0.00556982
Arpc2	10057.6	-0.126081	0.112459	-1.12113	0.262235	0.349373
Arpc3	9016.53	0.159243	0.144896	1.09902	0.271759	0.359625
Arpc4	5306.65	0.406327	0.181276	2.24148	0.0249952	0.0603945
Arpc5	5124.21	0.258109	0.131921	1.95654	0.0504013	0.0998041
Arpc5l	5668.66	-0.132878	0.170551	-0.77911	0.435915	0.523278
Arpin	1383.34	0.0876573	0.0835187	1.04955	0.293924	0.382394
Arpp19	37940.7	-0.372935	0.16551	-2.25325	0.0242433	0.0592336
Arpp21	115182	-0.399006	0.118312	-3.37248	0.000744939	0.00750453
Arrb1	30332.8	0.21845	0.113387	1.92659	0.0540313	0.104675
Arrb2	2023.92	0.328989	0.141513	2.32481	0.0200823	0.0525534
Arrdc1	530.677	0.170194	0.128227	1.32729	0.184414	0.263826
Arrdc2	556.988	0.242626	0.10214	2.37543	0.0175287	0.0479705
Arrdc3	5734.23	-0.266701	0.107855	-2.47278	0.0134066	0.0404443
Arrdc4	607.827	0.00372942	0.117438	0.0317566	0.974666	0.981114
Arsa	1500.85	0.550426	0.243588	2.25966	0.0238421	0.0586055
arsb	8847.27	-0.319919	0.0954066	-3.35322	0.000798782	0.00789159
Arsg	1983.86	-0.0371728	0.106613	-0.348672	0.727336	0.78402
Arsj	519.209	-0.324714	0.16286	-1.99382	0.0461717	0.0938247
Arsk	1075.01	-0.187479	0.117389	-1.59707	0.11025	0.177069
Art3	296.501	-0.251236	0.131604	-1.90903	0.0562583	0.107557
Arv1	814.633	0.153236	0.0951361	1.61071	0.107244	0.173395
Arvcf	2250.61	0.441893	0.192766	2.29237	0.0218841	0.0553259
Arx	751.299	0.3975	0.0948283	4.19179	2.76761e-05	0.00123375
Arxes1	613.672	0.437518	0.168593	2.59511	0.00945604	0.032724
Arxes2	2124.53	0.234062	0.133016	1.75966	0.0784662	0.136901
As3mt	893.978	-0.0746913	0.108548	-0.688092	0.491395	0.576463
Asah1	7525.11	-0.362449	0.104524	-3.46763	0.000525068	0.00626653
Asah2	2242.03	-0.393323	0.154546	-2.54502	0.0109271	0.0358833
Asap1	33885.9	-0.514617	0.0957293	-5.37575	7.62653e-08	3.75284e-05
Asap2	3958.12	-0.254288	0.0909129	-2.79705	0.00515721	0.0230123
Asap3	310.26	0.415936	0.174572	2.3826	0.0171908	0.04737
Asb1	3252.19	0.294965	0.159946	1.84416	0.0651601	0.119799
Asb11	577.806	-0.165176	0.115763	-1.42684	0.153627	0.22852
Asb13	3822.95	-0.15754	0.114917	-1.3709	0.170406	0.247691
Asb18	277.154	0.0630576	0.124685	0.505736	0.613042	0.68572
Asb2	289.568	0.279742	0.178058	1.57107	0.116166	0.184166
Asb3	7270.89	-0.326188	0.139154	-2.34407	0.0190746	0.0506938
Asb5	746.156	-0.469024	0.188614	-2.48669	0.0128938	0.039465
Asb6	1562.56	0.591166	0.215317	2.74557	0.00604068	0.0251577
Asb7	3276.51	-0.32085	0.120519	-2.66224	0.00776221	0.0291316
Asb8	2593.93	0.130641	0.08697	1.50214	0.13306	0.204391
Ascc1	1270.79	0.174328	0.0738502	2.36056	0.0182472	0.0492314
Ascc2	2237.51	-0.0304092	0.0882157	-0.344714	0.730309	0.786562
Ascc3	15051.3	-0.446105	0.146954	-3.03569	0.0023999	0.0147333
Ascl1	270.621	-0.208911	0.296887	-0.703672	0.481637	0.567044
Asf1a	1118.26	-0.111127	0.113902	-0.975641	0.329243	0.41847
Ash1l	29539.2	-0.333612	0.120445	-2.76982	0.00560874	0.0242027
Ash2l	3444.42	0.0521375	0.0469774	1.10984	0.267067	0.354679
Asic1	4842.36	0.254383	0.110634	2.29932	0.0214869	0.0547725
Asic2	88648.7	-0.445483	0.184598	-2.41327	0.0158103	0.044952
Asic4	1350.64	1.04903	0.286711	3.65884	0.000253363	0.00422917
Asl	746.797	0.356945	0.129823	2.74947	0.00596911	0.0249483
Asna1	4024.33	0.296262	0.111595	2.6548	0.00793558	0.029485
Asns	9527.97	-0.0764602	0.069669	-1.09748	0.272432	0.360225
Aspa	2848.26	-0.561566	0.15371	-3.65341	0.000258777	0.00427752
Aspg	217.928	0.970405	0.337288	2.87708	0.00401368	0.0199189
Asph	19226.6	-0.232372	0.0737737	-3.14979	0.00163387	0.0117042
Asphd1	1093.64	0.774016	0.224146	3.45318	0.000554024	0.00646643
Asphd2	5441.09	0.536915	0.24215	2.21728	0.0266039	0.0631257
Aspn	245.728	-0.673487	0.33675	-1.99996	0.0455043	0.0928373
Aspscr1	1639.9	0.323344	0.234336	1.37983	0.167638	0.24462
Asrgl1	12057.6	0.0451108	0.0557603	0.809012	0.418508	0.506565
Ass1	1590.86	0.336811	0.132642	2.53925	0.011109	0.0361558
Aste1	1095.15	-0.28145	0.112967	-2.49143	0.0127229	0.039164
Astn1	46998	-0.317376	0.103147	-3.07693	0.00209145	0.0135951
Astn2	37266.6	-0.813968	0.161693	-5.03402	4.80308e-07	0.000118174
Asxl1	7803.57	-0.277037	0.0603355	-4.59161	4.39847e-06	0.000436158
Asxl2	8317.34	-0.33466	0.101269	-3.30465	0.000950935	0.00866151
Asxl3	5925.37	-0.444312	0.153324	-2.89786	0.00375723	0.0190603
Atad1	12527.2	-0.325709	0.0917529	-3.54985	0.000385451	0.0053257
Atad2	2573.73	-0.49558	0.163767	-3.02612	0.0024771	0.0150128
Atad2b	8352.1	-0.450042	0.162846	-2.7636	0.00571671	0.0244206
Atad3a	2732.09	0.199903	0.157776	1.267	0.205154	0.287611
Atad5	1153.77	-0.384426	0.156905	-2.45005	0.0142837	0.0421948
Atat1	1752.06	0.22906	0.12308	1.86107	0.0627345	0.11653
Atcay	14724.8	0.357247	0.124914	2.85993	0.00423732	0.0205836
Atf1	1617.97	-0.0539355	0.0859692	-0.627382	0.530409	0.612349
Atf2	18335.9	-0.381606	0.100179	-3.80924	0.000139393	0.003012
Atf4	6197.1	0.603821	0.235156	2.56775	0.0102361	0.034418
Atf5	447.676	1.14763	0.313142	3.66488	0.000247457	0.00419333
Atf6	17659	-0.284728	0.0968129	-2.94101	0.00327145	0.0175787
Atf6b	1530.59	0.811789	0.239689	3.38684	0.00070703	0.0073384
Atf7ip	12148.8	-0.249853	0.0965319	-2.58829	0.00964526	0.0331546
Atg10	4871.91	-0.280135	0.147676	-1.89695	0.057834	0.109847
Atg101	1460.23	0.677909	0.214248	3.16413	0.00155548	0.0113154
Atg12	5967.23	-0.186228	0.106067	-1.75575	0.0791305	0.137835
Atg13	3474.02	0.118999	0.0934608	1.27325	0.202929	0.284929
Atg14	1940.87	0.0743833	0.0699235	1.06378	0.287428	0.375662
Atg16l1	6963.17	0.0194096	0.0823015	0.235835	0.813561	0.854413
Atg16l2	2036.43	-0.00436062	0.0777916	-0.0560552	0.955298	0.967549
Atg2a	3013.17	0.537336	0.20499	2.62128	0.00876003	0.0312102
Atg2b	9643.35	-0.076002	0.038266	-1.98615	0.047017	0.0948794
Atg3	5594.92	-0.369752	0.170508	-2.16853	0.0301183	0.0688341
Atg4a	1506.39	-0.557694	0.159626	-3.49375	0.000476284	0.0059276
Atg4b	3959.55	0.260475	0.113912	2.28663	0.0222172	0.0558551
Atg4c	7118.19	-0.353046	0.0881583	-4.00468	6.21008e-05	0.00192377
Atg4d	1270.14	0.476485	0.207825	2.29272	0.0218642	0.0553045
Atg5	3031.68	-0.246775	0.0904305	-2.72889	0.00635479	0.0258516
Atg7	2672.13	-0.00657057	0.10478	-0.0627084	0.949999	0.963708
Atg9a	5083.82	0.342815	0.180144	1.903	0.05704	0.108678
Atg9b	230.633	0.578979	0.229963	2.51771	0.0118121	0.0374374
Athl1	293.583	0.490497	0.202375	2.42371	0.0153631	0.0441498
Atic	1988.39	0.227307	0.0969988	2.3434	0.0191089	0.0507745
Atl1	11941.4	-0.159246	0.0852948	-1.86701	0.0618998	0.11541
Atl2	5999.92	-0.0965152	0.0723029	-1.33487	0.181917	0.261072
Atl3	4155.51	-0.118211	0.0751137	-1.57377	0.115541	0.183426
Atm	5270.15	-0.319376	0.100382	-3.18162	0.00146456	0.0109604
Atmin	6395.48	0.187579	0.0872138	2.15079	0.0314926	0.071149
Atox1	1632.08	0.812123	0.2957	2.74644	0.00602453	0.0251232
Atp10a	2841.53	-0.16743	0.109674	-1.52662	0.126855	0.19694
Atp10b	266.417	-0.472343	0.207199	-2.27966	0.0226278	0.0564879
Atp11a	7896.8	0.0877895	0.0879832	0.997798	0.318377	0.40725
Atp11b	12809.6	-0.584183	0.169449	-3.44754	0.000565714	0.00653956
Atp11c	5817.14	-0.409356	0.188198	-2.17514	0.0296197	0.0679617
Atp13a1	3528.82	0.313897	0.14038	2.23605	0.0253487	0.060946
Atp13a2	7202.91	0.750142	0.248997	3.01265	0.00258979	0.0153824
Atp13a3	10460	-0.284348	0.098355	-2.89104	0.00383966	0.019306
Atp13a4	940.922	-0.173316	0.156191	-1.10964	0.267153	0.354744
Atp13a5	2928.45	-0.437548	0.134819	-3.24546	0.00117262	0.00958663
Atp1a1	60420.3	0.080324	0.141152	0.569062	0.569314	0.646243
Atp1a2	68838.1	0.290356	0.12433	2.33537	0.0195241	0.0515673
Atp1a3	65317.3	0.801657	0.21049	3.80854	0.000139792	0.003012
Atp1b1	78814.3	-0.104025	0.151468	-0.686775	0.492224	0.577277
Atp1b2	6053.91	0.222852	0.157893	1.41142	0.158122	0.233631
Atp1b3	9933.98	-0.200862	0.0610945	-3.28773	0.00100999	0.0089116
Atp2a2	73987.5	0.057789	0.0897847	0.64364	0.519809	0.602787
Atp2a3	429.962	0.393483	0.130559	3.01383	0.00257971	0.0153582
Atp2b1	136048	-0.435948	0.207498	-2.10098	0.035643	0.0776994
Atp2b2	102283	-0.0437782	0.0890041	-0.491867	0.622813	0.693919
Atp2b3	10919.9	-0.0226644	0.0787858	-0.287671	0.773598	0.821976
Atp2b4	23468	0.0184252	0.127657	0.144333	0.885238	0.912409
Atp2c1	26258.6	-0.166995	0.0720621	-2.31737	0.0204833	0.0532542
Atp5a1	56509.7	0.256945	0.107235	2.3961	0.0165706	0.046258
Atp5b	67097.2	0.230006	0.124583	1.84621	0.0648624	0.119386
Atp5c1	18163.3	0.00226322	0.0817002	0.0277015	0.9779	0.983363
Atp5d	7828.69	0.683805	0.238721	2.86445	0.00417738	0.0204146
Atp5e	3448.52	1.47944	0.556082	2.66047	0.00780314	0.0292246
Atp5f1	18086.2	0.0486597	0.058847	0.826885	0.408302	0.496797
Atp5g1	7706.14	0.402966	0.208299	1.93455	0.0530453	0.103454
Atp5g2	2381.65	0.52051	0.190637	2.73037	0.00632634	0.0258015
Atp5g3	6207.31	1.16641	0.384366	3.03462	0.0024084	0.0147572
Atp5h	16128.2	-0.155363	0.105165	-1.47732	0.139591	0.212055
Atp5j	6582.1	0.198133	0.123559	1.60355	0.108813	0.175379
Atp5j2	8704.34	0.409244	0.218111	1.87631	0.0606124	0.113623
Atp5k	6948.17	1.26235	0.463275	2.72485	0.00643306	0.026054
Atp5l	5222.9	0.748382	0.259407	2.88497	0.00391445	0.0195555
Atp5o	10366.8	0.457356	0.172712	2.64809	0.00809481	0.0297858
Atp5s	1199.27	-0.296877	0.187191	-1.58596	0.112748	0.180132
Atp5sl	2040.92	0.157218	0.0840763	1.86994	0.0614918	0.114865
Atp6ap1	19070.7	0.248584	0.126849	1.95968	0.050033	0.0992746
Atp6ap1l	1309.59	-0.143206	0.0760361	-1.8834	0.0596462	0.112322
Atp6ap2	18837.6	0.0461241	0.11344	0.406594	0.684306	0.748611
Atp6v0a1	35226.5	0.0461429	0.0558634	0.825995	0.408807	0.497196
Atp6v0a2	4646.92	0.242208	0.0917908	2.63869	0.00832265	0.0302328
Atp6v0a4	150.412	-0.458769	0.189792	-2.41722	0.0156395	0.0446733
Atp6v0b	11084.7	0.361441	0.202556	1.7844	0.074359	0.131765
Atp6v0d1	12090.9	0.12664	0.0867116	1.46047	0.14416	0.217446
Atp6v0e	2165.54	0.184689	0.134267	1.37554	0.168964	0.24607
Atp6v0e2	17708.9	0.186312	0.131423	1.41765	0.156293	0.23161
Atp6v1a	40621.7	0.0105485	0.068418	0.154177	0.87747	0.905862
Atp6v1b2	33861.7	0.350924	0.141166	2.48589	0.0129226	0.0395342
Atp6v1c1	19772.2	0.0110072	0.0908308	0.121183	0.903546	0.926576
Atp6v1d	22220.5	-0.426248	0.165923	-2.56895	0.0102007	0.0343352
Atp6v1e1	23968	0.21057	0.136499	1.54264	0.122917	0.192414
Atp6v1f	3748.54	0.667054	0.249269	2.67604	0.00744986	0.0283894
Atp6v1g1	4797.64	0.392996	0.144634	2.71718	0.00658407	0.0264313
Atp6v1g2	17578	-0.166459	0.182009	-0.914565	0.36042	0.449786
Atp6v1h	17572.3	-0.0454635	0.101471	-0.448042	0.654123	0.722013
Atp7a	1633.18	-0.301377	0.117933	-2.55549	0.0106039	0.0352016
Atp7b	265.061	0.0456399	0.0996155	0.45816	0.646837	0.715703
Atp8a1	55247.6	-0.271835	0.058608	-4.63819	3.51479e-06	0.000379676
Atp8a2	16894.1	-0.292751	0.0893159	-3.27771	0.00104655	0.00912092
Atp8b1	1304.63	-0.528884	0.139828	-3.78241	0.00015532	0.00313272
Atp8b2	6632.59	0.231794	0.124963	1.8549	0.0636098	0.117605
Atp9a	24114.9	0.615792	0.180328	3.41484	0.000638196	0.00694901
Atp9b	20658.3	-0.216612	0.0782995	-2.76646	0.00566692	0.024289
Atpaf1	5085.95	-0.149068	0.0720086	-2.07015	0.0384386	0.0821967
Atpaf2	1849.74	0.0250197	0.075032	0.333454	0.738792	0.792961
Atpif1	13845.9	-0.134559	0.15445	-0.871219	0.383635	0.472444
Atr	5331.18	-0.462053	0.163645	-2.82351	0.00475014	0.0219082
Atraid	3071.37	0.293395	0.18121	1.61909	0.105428	0.171195
Atrn	29937	-0.209928	0.0772885	-2.71616	0.00660443	0.0264632
Atrnl1	48191.2	-0.49396	0.101194	-4.88133	1.05375e-06	0.000187246
Atrx	47259.5	-0.602329	0.225037	-2.67657	0.00743789	0.0283722
Atxn1	39420.6	-0.291636	0.126612	-2.30338	0.0212576	0.054503
Atxn10	19076.9	-0.0923371	0.0706319	-1.3073	0.19111	0.271472
Atxn1l	3747.19	0.174461	0.0824893	2.11495	0.0344343	0.0757876
Atxn2	12215.7	-0.197489	0.0612002	-3.22693	0.00125125	0.0100366
Atxn2l	4222.49	0.235422	0.104677	2.24903	0.0245104	0.0595719
Atxn3	4733.16	-0.21677	0.0902902	-2.40081	0.0163587	0.0459179
Atxn7	6728.86	-0.355805	0.0886538	-4.01342	5.9845e-05	0.00188412
Atxn7l1	7811.08	-0.286078	0.136658	-2.09338	0.0363156	0.0787628
Atxn7l2	1053.87	0.0939548	0.148042	0.634649	0.525658	0.608126
Atxn7l3	9879.5	0.48052	0.255943	1.87745	0.060456	0.113431
Atxn7l3b	11075.8	0.244656	0.131072	1.86657	0.0619613	0.115508
Auh	5164.5	0.00505345	0.0834086	0.0605867	0.951688	0.965009
Aup1	2529.07	0.332102	0.120422	2.75783	0.00581865	0.024634
Aurkaip1	2825.68	0.377613	0.158755	2.3786	0.0173786	0.0476822
Auts2	78770.6	-0.40411	0.18324	-2.20536	0.0274289	0.0645021
Aven	1597.76	-0.317209	0.107896	-2.93996	0.00328257	0.0176015
Avl9	10237	-0.305377	0.124347	-2.45585	0.0140551	0.0418196
Avpi1	1278.59	0.484207	0.214697	2.2553	0.0241143	0.0590013
AW011738	130.284	0.84717	0.220239	3.8466	0.000119769	0.00280646
Axin1	2929.94	-0.00428964	0.100219	-0.0428026	0.965859	0.975543
Axin2	1981.89	0.158525	0.121302	1.30687	0.191258	0.271643
Axl	2431.35	0.302598	0.115679	2.61584	0.00890091	0.0315627
Azi2	9184.74	-0.252693	0.113189	-2.23249	0.0255829	0.0613395
Azin1	16160.2	-0.140756	0.0791581	-1.77817	0.0753765	0.132979
Azin2	1883.91	0.437472	0.195831	2.23393	0.0254877	0.06118
B2m	9153.31	-0.157165	0.463833	-0.338839	0.734731	0.789928
B3galnt1	3922.22	-0.0706807	0.087365	-0.809027	0.4185	0.506565
B3galnt2	2675.05	-0.256164	0.0856794	-2.9898	0.0027916	0.0160353
B3galt1	61447.4	-0.568258	0.171278	-3.31776	0.000907437	0.00848666
B3galt2	9080.7	-0.440753	0.211264	-2.08627	0.0369539	0.0797821
B3galt4	193.638	0.533988	0.258756	2.06367	0.0390487	0.0831402
B3galt5	3679.98	0.306557	0.0957829	3.20054	0.0013717	0.0105929
B3galt6	848.854	0.443149	0.213505	2.07559	0.0379318	0.0813441
B3gat1	11028.4	0.179712	0.0803438	2.23679	0.0253002	0.0608898
B3gat2	988.969	-0.110694	0.112767	-0.981613	0.326291	0.415297
B3gat3	5956.43	0.343708	0.183446	1.87363	0.060982	0.114198
B3glct	2955.94	-0.36339	0.0865931	-4.19653	2.71041e-05	0.00121674
B3gnt9	226.366	0.02605	0.191381	0.136116	0.89173	0.918065
B3gntl1	1894.07	-0.0589883	0.0967966	-0.609405	0.542256	0.623272
B430305J03Rik	171.118	0.65526	0.313384	2.09092	0.0365354	0.0791455
B4galnt1	6154.39	0.20882	0.0979371	2.13219	0.0329914	0.0734969
B4galnt3	152.367	-0.223722	0.159285	-1.40454	0.160159	0.235878
B4galnt4	4601.64	0.21354	0.120871	1.76667	0.0772829	0.135227
B4galt1	733.467	-0.0542822	0.077408	-0.701248	0.483148	0.568405
B4galt2	4141.31	0.284207	0.18422	1.54275	0.12289	0.192396
B4galt3	1857.9	0.252038	0.189562	1.32958	0.183657	0.262977
B4galt4	1716.09	-0.0467556	0.0944179	-0.495198	0.62046	0.69184
B4galt5	4463.98	0.220338	0.134229	1.6415	0.100693	0.16563
B4galt6	11099.8	-0.229252	0.100585	-2.27919	0.0226561	0.0565032
B4galt7	1228.29	0.25863	0.18691	1.38371	0.166446	0.243178
B4gat1	5361.87	0.505544	0.236485	2.13774	0.032538	0.0727908
B9d1	1113.34	0.162605	0.0960607	1.69274	0.0905057	0.152943
B9d2	486.651	0.793077	0.240346	3.29973	0.000967768	0.0087256
Baalc	14043.6	-0.314994	0.166064	-1.89682	0.0578512	0.109863
Babam1	3450.6	0.207321	0.10025	2.06804	0.0386362	0.0825641
Bace1	8020.32	0.159049	0.0645477	2.46405	0.0137378	0.041162
Bace2	718.111	-0.629288	0.147587	-4.26385	2.00938e-05	0.00104543
Bach1	1397.07	0.0933505	0.0684421	1.36393	0.172589	0.250068
Bach2	7632.74	-0.550333	0.132015	-4.16872	3.06313e-05	0.0012986
Bad	1500.58	0.468429	0.164351	2.85017	0.00436954	0.0209299
Bag1	5243.04	-0.00948378	0.0994074	-0.0954031	0.923995	0.94241
Bag2	645.199	-0.208408	0.12134	-1.71755	0.0858781	0.146869
Bag3	295.417	0.149921	0.142554	1.05168	0.292945	0.381469
Bag4	8517.98	-0.342252	0.144317	-2.37153	0.0177148	0.0482629
Bag5	3515.64	0.157949	0.0978817	1.61368	0.106598	0.172642
Bag6	8832.46	0.617868	0.225387	2.74137	0.00611844	0.0253144
Bahcc1	1483.16	0.638206	0.197469	3.23192	0.00122959	0.00990644
Bahd1	2347.16	0.505493	0.183871	2.74918	0.0059745	0.0249552
Baiap2	24405.4	0.474275	0.120115	3.94851	7.86401e-05	0.00214525
Baiap3	1426.56	1.74126	0.603738	2.88413	0.003925	0.0195852
Bak1	855.138	0.137749	0.134171	1.02667	0.304578	0.393177
Bambi	211.025	0.632356	0.191052	3.30986	0.000933438	0.00857916
Banf1	926.897	0.536567	0.194145	2.76374	0.00571424	0.0244182
Bank1	519.927	-0.386512	0.245137	-1.57672	0.11486	0.182571
Bap1	8261.12	0.317176	0.0968317	3.27554	0.00105461	0.00916621
Bard1	143.79	-0.09984	0.205018	-0.486982	0.626271	0.696922
Barx2	403.255	-0.22193	0.258365	-0.858978	0.390353	0.479011
Basp1	29660.5	-0.230576	0.0960733	-2.4	0.0163949	0.0459389
Bax	1071.51	0.337687	0.119447	2.82709	0.00469731	0.0217552
Baz1a	808.987	-0.253001	0.143193	-1.76685	0.0772534	0.135224
Baz1b	16111.6	-0.222413	0.103554	-2.14779	0.0317305	0.0715347
Baz2a	5229.12	-0.130711	0.0874899	-1.49402	0.135172	0.206889
Baz2b	17495.4	-0.407609	0.122707	-3.32182	0.000894326	0.00842496
Bbc3	180.915	0.793268	0.539438	1.47055	0.141414	0.214133
Bbip1	4224.91	-0.254722	0.0920517	-2.76716	0.00565468	0.0242682
Bbof1	2357.63	-0.455158	0.141873	-3.20821	0.00133563	0.0104195
Bbs1	3505.74	0.29512	0.104319	2.82901	0.00466916	0.0216911
Bbs10	543.006	-0.0264274	0.0971741	-0.271959	0.785654	0.831471
Bbs2	3055.14	-0.0198934	0.0694872	-0.286288	0.774657	0.822623
Bbs4	4868.83	-0.132675	0.0618006	-2.14683	0.0318072	0.0716319
Bbs5	2296.41	-0.24647	0.0883288	-2.79037	0.00526479	0.023275
Bbs7	3375.85	-0.343233	0.149369	-2.29788	0.0215687	0.0548499
Bbs9	7739.34	-0.373073	0.156309	-2.38676	0.0169975	0.0470299
Bbx	10218.8	-0.364518	0.113169	-3.221	0.00127746	0.0101326
BC003965	1717.21	0.340085	0.152499	2.23008	0.0257424	0.0616179
BC031181	4947.34	0.200272	0.0986814	2.02948	0.0424097	0.088261
Bcam	736.382	0.746117	0.229641	3.24906	0.00115789	0.00955128
Bcan	9040.33	0.617796	0.245799	2.51342	0.0119566	0.037678
Bcap29	2962.45	-0.250376	0.108141	-2.31527	0.0205983	0.0533665
Bcap31	3171.11	0.163697	0.0971724	1.68461	0.0920648	0.154821
Bcar1	3383.97	0.28738	0.15163	1.89527	0.0580562	0.110188
Bcar3	1809.14	0.0149318	0.0508546	0.293618	0.76905	0.818163
Bcas1	9287.74	-0.244161	0.136709	-1.78599	0.0741014	0.131638
Bcas2	4718.67	-0.249624	0.21395	-1.16674	0.243315	0.329136
Bcas3	16197.3	-0.281728	0.120064	-2.34648	0.0189519	0.0504727
Bcat1	6494.74	0.256692	0.111072	2.31103	0.0208312	0.0537436
Bcat2	740.762	0.356534	0.14064	2.53509	0.0112418	0.0363846
Bccip	2432.2	0.13762	0.0880234	1.56345	0.117947	0.186343
Bcdin3d	353.088	0.256278	0.121732	2.10526	0.0352688	0.0772229
Bche	804.997	-0.319003	0.264746	-1.20494	0.228227	0.313137
Bckdha	2307.56	0.600648	0.234961	2.55638	0.0105768	0.0351662
Bckdhb	5944.56	-0.30171	0.0843253	-3.57793	0.000346327	0.00505132
Bckdk	2471.34	0.110729	0.117509	0.942304	0.346037	0.435705
Bcl10	841.717	0.196706	0.109492	1.79653	0.0724103	0.129262
Bcl11a	11450.5	-0.223094	0.109813	-2.03157	0.0421968	0.0879834
Bcl11b	11732.7	0.250787	0.126428	1.98363	0.047297	0.0953393
Bcl2	5156.64	-0.33955	0.0956756	-3.54898	0.00038673	0.00533746
Bcl2l1	6706.3	0.26643	0.126402	2.1078	0.0350483	0.0768181
Bcl2l11	320.435	0.162311	0.136057	1.19296	0.232885	0.317987
Bcl2l12	116.93	0.305596	0.21414	1.42708	0.153557	0.228442
Bcl2l13	4023.73	0.115644	0.058092	1.99071	0.046513	0.0942619
Bcl6	1888.5	0.22914	0.103739	2.20882	0.0271872	0.0641258
Bcl7a	4961.19	0.230314	0.128246	1.79588	0.0725141	0.129411
Bcl7b	2593.8	0.186774	0.0938213	1.99075	0.0465088	0.0942619
Bcl7c	734.708	-0.0427179	0.105739	-0.403995	0.686217	0.749764
Bcl9	2950.44	-0.110866	0.11867	-0.934239	0.350181	0.439884
Bcl9l	1767.23	0.587542	0.242443	2.42342	0.0153751	0.0441572
Bclaf1	29136.3	-0.536644	0.193023	-2.78021	0.00543234	0.0237263
Bco2	296.406	0.00476988	0.098662	0.0483457	0.961441	0.972539
Bcor	3763.96	-0.0674277	0.0655765	-1.02823	0.303842	0.392464
Bcorl1	2395.12	-0.308369	0.122679	-2.51362	0.0119499	0.0376666
Bcr	13259	0.475182	0.138825	3.42287	0.000619629	0.00684803
Bcs1l	1181.38	-0.0327631	0.127142	-0.257689	0.796647	0.839979
Bdh1	3447.64	0.288056	0.124916	2.306	0.0211108	0.0542457
Bdnf	3426.02	0.0279913	0.108688	0.257538	0.796763	0.840032
Bdp1	12120.4	-0.52703	0.183078	-2.87873	0.00399283	0.019854
Bean1	1034.9	-0.228898	0.129195	-1.77172	0.0764405	0.134227
Becn1	7340.53	0.188159	0.0804825	2.33789	0.0193929	0.0512932
Begain	4491.57	0.520163	0.180732	2.87809	0.00400085	0.0198707
Bend3	680.082	0.224075	0.111911	2.00225	0.0452579	0.0925115
Bend4	1269.12	0.102808	0.0947009	1.08561	0.277653	0.365435
Bend6	13384.2	-0.364894	0.11098	-3.28793	0.00100926	0.0089113
Bend7	600.389	-0.0507315	0.176218	-0.287891	0.77343	0.821866
Bet1	1704.23	-0.200125	0.13383	-1.49536	0.13482	0.20645
Bex1	2610.92	0.699432	0.179191	3.90327	9.49005e-05	0.00242347
Bex2	15683.6	0.143996	0.131715	1.09323	0.274291	0.362118
Bex4	839.834	0.258745	0.158639	1.63103	0.102883	0.168359
Bfar	3423.77	-0.0493664	0.064667	-0.763394	0.445228	0.53226
Bfsp2	298.819	0.516783	0.216782	2.38388	0.017131	0.0472766
Bgn	449.966	0.177153	0.331062	0.535104	0.592578	0.666266
Bhlhb9	6402.88	-0.0261906	0.0832465	-0.314615	0.753054	0.804587
Bhlhe22	1813.91	-0.0729538	0.10009	-0.728882	0.466074	0.552329
Bhlhe40	5243.76	-0.250766	0.116093	-2.16005	0.030769	0.0699588
Bhlhe41	2958.9	-0.209963	0.214897	-0.977039	0.32855	0.417715
Bicc1	1778.44	-0.35067	0.144023	-2.43482	0.0148993	0.0433299
Bicd1	24388.9	-0.615066	0.17519	-3.51085	0.000446677	0.00570338
Bicd2	6286.01	0.218709	0.0665561	3.28608	0.00101592	0.00893227
Bicdl1	8759.67	-0.152031	0.134482	-1.13049	0.258269	0.345204
Bicral	4770.31	-0.00177736	0.0775823	-0.0229093	0.981723	0.986348
Bid	725.332	0.0095342	0.110175	0.0865366	0.93104	0.94831
Bin1	15173	0.245205	0.11841	2.07082	0.038376	0.0820995
Bin2	282.048	0.15112	0.131011	1.15349	0.248709	0.334981
Bin3	2039.63	-0.0822211	0.0787758	-1.04374	0.296607	0.385208
Birc2	4566.16	-0.0769812	0.0766752	-1.00399	0.315383	0.404228
Birc3	282.04	-0.186385	0.15551	-1.19854	0.230708	0.315788
Birc6	39298.1	-0.277058	0.0651875	-4.25017	2.13609e-05	0.00106575
Bivm	2475.76	-0.315378	0.100784	-3.12926	0.00175247	0.0122855
Blcap	4563.49	0.503153	0.160535	3.13421	0.00172315	0.0121132
Blm	1034.64	-0.468306	0.151905	-3.08289	0.00204999	0.0134639
Blmh	5473.88	-0.0787124	0.0476425	-1.65215	0.0985045	0.163039
Blnk	958.325	-0.198354	0.127154	-1.55995	0.118772	0.18737
Bloc1s1	794.705	0.717193	0.200153	3.58322	0.000339391	0.00499099
Bloc1s2	1255.28	0.398903	0.135364	2.94689	0.0032099	0.01735
Bloc1s3	448.225	0.427983	0.19177	2.23176	0.0256311	0.0614205
Bloc1s4	381.701	0.288746	0.191192	1.51024	0.130983	0.201781
Bloc1s5	1239.02	0.186345	0.120615	1.54495	0.122357	0.191796
Bloc1s6	2058.03	-0.0351663	0.0781806	-0.449808	0.652849	0.720979
Blvra	1093.07	0.11486	0.132138	0.869237	0.384718	0.473459
Blvrb	511.26	0.656536	0.210161	3.12396	0.00178433	0.0123934
Blzf1	2421.38	-0.400657	0.168051	-2.38413	0.0171193	0.0472614
Bmf	269.126	0.413619	0.156122	2.64933	0.00806507	0.0297519
Bmi1	4588.53	-0.354161	0.145173	-2.43957	0.0147046	0.0429621
Bmp1	2995.51	-0.0957322	0.120115	-0.797003	0.425449	0.513316
Bmp2	255.183	-0.0881689	0.178142	-0.494937	0.620645	0.691985
Bmp2k	4044.51	-0.299208	0.0937269	-3.19234	0.00141126	0.0107411
Bmp3	3198.57	-0.41246	0.166521	-2.47692	0.0132522	0.0401775
Bmp4	169.524	0.181741	0.29926	0.607301	0.543651	0.624314
Bmp6	790.581	0.375496	0.250074	1.50154	0.133217	0.20457
Bmp7	601.519	0.355769	0.218041	1.63166	0.10275	0.168213
Bmper	2688.74	-0.277705	0.108719	-2.55433	0.0106394	0.0352826
Bmpr1a	9637.96	-0.328148	0.151191	-2.17043	0.0299744	0.0686156
Bmpr1b	8963.36	-0.299871	0.14571	-2.058	0.0395904	0.0839303
Bmpr2	38443.6	-0.5319	0.196905	-2.70131	0.00690679	0.0271226
Bms1	4770.77	-0.363005	0.175769	-2.06523	0.038901	0.0829499
Bmx	155.143	-0.382951	0.167172	-2.29075	0.0219776	0.0554882
Bmyc	689.949	1.34709	0.339539	3.96742	7.2654e-05	0.00204725
Bnc2	903.969	-0.0480267	0.490326	-0.0979484	0.921973	0.941265
Bnip1	1283.32	0.173139	0.0927917	1.86589	0.0620569	0.115653
Bnip2	3961.38	-0.441673	0.210641	-2.09681	0.0360106	0.0782738
Bnip3	8365.02	-0.288708	0.089698	-3.21867	0.00128787	0.010189
Bnip3l	10353.1	-0.153193	0.100593	-1.52289	0.127785	0.19812
Boc	2887.48	-0.352479	0.110899	-3.17838	0.00148098	0.0110306
Bod1	3278.79	0.292531	0.150364	1.94548	0.0517171	0.101554
Bod1l	18129.9	-0.412004	0.221925	-1.8565	0.063382	0.117286
Bok	1751.44	0.783959	0.519096	1.51024	0.130983	0.201781
Bola1	520.068	0.923762	0.37404	2.46969	0.013523	0.0406804
Bola2	1809.35	0.408972	0.145842	2.80421	0.005044	0.0227238
Bola3	1102.87	-0.0147511	0.0914612	-0.161282	0.871871	0.901504
Bop1	3186	0.578101	0.224336	2.57694	0.00996782	0.0338541
Bora	561.565	-0.469726	0.148938	-3.15383	0.00161144	0.0115824
Borcs5	2661.69	-0.0672829	0.137953	-0.487724	0.625745	0.696518
Borcs6	878.341	0.597837	0.400021	1.49452	0.135041	0.206763
Borcs7	1232.91	-0.178642	0.123198	-1.45004	0.147049	0.220607
Bpgm	3646.43	-0.0302072	0.0796419	-0.379288	0.704474	0.765309
Bphl	2220.41	0.029643	0.0819948	0.361523	0.717709	0.775668
Bpnt1	5604.21	-0.00440217	0.0694417	-0.0633938	0.949453	0.963383
Bptf	17120.9	-0.268942	0.126873	-2.11977	0.0340252	0.0751456
Braf	30689.7	-0.364753	0.127481	-2.86124	0.00421991	0.0205316
Brap	5890.15	0.130615	0.057036	2.29005	0.0220184	0.0555409
Brat1	1398.22	0.477975	0.259835	1.83954	0.0658364	0.12064
Brca1	206.937	0.0385115	0.14838	0.259546	0.795214	0.838952
Brca2	1433.41	-0.437031	0.215363	-2.02928	0.0424299	0.0882679
Brcc3	4693.44	-0.463106	0.175923	-2.63243	0.00847765	0.0305826
Brd1	6603.96	0.0788129	0.0936848	0.841256	0.400204	0.488943
Brd2	10229.2	-0.0409463	0.118306	-0.346104	0.729264	0.785706
Brd3	3716.23	0.164705	0.0775385	2.12417	0.0336558	0.0745791
Brd4	9170.86	-0.224685	0.0771842	-2.91103	0.00360242	0.018561
Brd7	5146.39	-0.492427	0.212678	-2.31536	0.0205931	0.0533665
Brd8	7137.31	-0.133352	0.103907	-1.28338	0.199358	0.280808
Brd9	7417.78	-0.232341	0.124957	-1.85936	0.0629755	0.116786
Brdt	2643.28	-0.436746	0.1424	-3.06704	0.00216191	0.0138807
Bre	9814.39	-0.374999	0.111087	-3.37572	0.000736229	0.00748753
Brf1	3000.28	0.324434	0.122264	2.65356	0.0079648	0.0295114
Brf2	795.504	0.407458	0.159436	2.55561	0.0106001	0.0352016
Bri3	1283.6	0.250072	0.11721	2.13353	0.0328814	0.0733411
Bri3bp	10556.6	0.116968	0.131865	0.887029	0.375064	0.463764
Brinp1	67667.1	-0.529329	0.134548	-3.93411	8.35046e-05	0.00223506
Brinp2	14903.8	-0.239591	0.0751515	-3.18811	0.00143204	0.0108343
Brinp3	41109.3	-0.707465	0.249583	-2.83458	0.00458857	0.0215199
Brix1	1515.69	-0.241591	0.165356	-1.46104	0.144005	0.21729
Brk1	8139.33	0.305073	0.198564	1.5364	0.124441	0.194253
Brms1	1227.71	0.550987	0.145442	3.78835	0.000151649	0.00312119
Brms1l	5241.57	0.0326449	0.0576811	0.565954	0.571425	0.648064
Brox	6803.38	-0.199417	0.0630235	-3.16416	0.0015553	0.0113154
Brpf1	2837.34	-0.0650655	0.0742238	-0.876612	0.380697	0.469414
Brpf3	2539.57	0.100975	0.0915785	1.10261	0.270198	0.358044
Brsk1	14016.1	0.31394	0.118196	2.65611	0.00790485	0.0294424
Brsk2	13956.4	0.176598	0.107132	1.64842	0.0992671	0.164022
Brwd1	23341	-0.135075	0.0521026	-2.59248	0.00952878	0.032869
Brwd3	4599.06	-0.543326	0.177358	-3.06344	0.00218806	0.0139552
Bscl2	4703.98	0.320446	0.128929	2.48545	0.0129388	0.0395552
Bsdc1	3975.09	-0.0775813	0.0817978	-0.948452	0.3429	0.432393
Bsg	22117.8	0.463684	0.193177	2.4003	0.0163817	0.0459219
Bsn	40379.4	0.366759	0.151981	2.4132	0.0158133	0.044952
Btaf1	16708.4	-0.117865	0.105499	-1.11722	0.263902	0.351229
Btbd1	13247.7	-0.335037	0.142877	-2.34494	0.0190301	0.0505966
Btbd10	14956	-0.251385	0.0973161	-2.58318	0.00978951	0.0334259
Btbd11	3003.64	-0.155137	0.115885	-1.33872	0.180662	0.259652
Btbd17	671.623	1.02766	0.282468	3.63816	0.000274592	0.00444701
Btbd19	371.906	0.333936	0.162502	2.05496	0.0398829	0.0844246
Btbd2	3348.16	0.600655	0.213093	2.81874	0.00482123	0.0221323
Btbd3	14910.5	-0.000261257	0.0855321	-0.00305449	0.997563	0.998226
Btbd6	2473.63	0.281089	0.185353	1.51651	0.129391	0.199956
Btbd7	7418.06	-0.349133	0.0859387	-4.06259	4.85318e-05	0.00167834
Btbd8	13227	-0.416799	0.17025	-2.44816	0.0143587	0.0423479
Btbd9	19018.1	-0.36163	0.132736	-2.72442	0.00644145	0.0260797
Btd	632.519	0.139121	0.101909	1.36515	0.172204	0.249653
Btf3	5217.29	0.104244	0.127081	0.82029	0.412051	0.500264
Btf3l4	5081.56	-0.316188	0.12829	-2.46464	0.0137152	0.0411134
Btg1	1437.42	0.260512	0.108727	2.39603	0.0165739	0.046258
Btg2	676.945	0.510733	0.155969	3.27457	0.00105821	0.00918317
Btg3	988.767	-0.144924	0.197807	-0.732654	0.46377	0.550313
Btla	179.147	-0.166393	0.181244	-0.918064	0.358586	0.448148
Btrc	13509.9	-0.142205	0.0697388	-2.03911	0.0414395	0.0869421
Bub3	4329.67	0.300992	0.134955	2.23032	0.0257262	0.0616002
Bud13	800.444	-0.220224	0.17363	-1.26836	0.204671	0.287091
Bud31	2681.3	-0.146219	0.0789486	-1.85208	0.0640148	0.118166
Bves	146.396	0.140435	0.170034	0.82592	0.40885	0.497196
Bysl	1756.24	0.332789	0.0943962	3.52545	0.00042276	0.00555943
Bzrap1	17172.1	0.120798	0.206761	0.584242	0.559058	0.637713
Bzw1	16636.4	-0.20818	0.0922448	-2.25682	0.0240192	0.0589264
Bzw2	4810.25	-0.109493	0.089406	-1.22467	0.220701	0.304929
C1d	3095.66	0.118459	0.156367	0.757568	0.44871	0.535772
C1galt1	3595.26	-0.286835	0.1191	-2.40835	0.0160249	0.0453792
C1galt1c1	1749.56	-0.0954532	0.0915152	-1.04303	0.296934	0.385487
C1qa	2109.31	0.391821	0.180109	2.17547	0.0295947	0.0679282
C1qb	2174.81	0.11318	0.0979095	1.15597	0.247694	0.333895
C1qbp	1930.17	-0.0990627	0.150857	-0.656664	0.511397	0.595126
C1qc	1879.04	0.710267	0.251181	2.82771	0.00468818	0.0217552
C1ql1	305.725	0.504051	0.181985	2.76975	0.00560999	0.0242027
C1ql3	6903.46	-0.0303757	0.100217	-0.3031	0.761814	0.811747
C1qtnf1	128.572	0.636315	0.244401	2.60357	0.0092258	0.0321796
C1qtnf4	4289.17	0.873048	0.460045	1.89775	0.0577295	0.109697
C1qtnf7	241.285	-0.349875	0.284839	-1.22833	0.219325	0.303487
C1ra	245.705	-0.253133	0.292258	-0.866129	0.386419	0.474959
C2cd2	1621.44	-0.217547	0.088416	-2.46049	0.0138747	0.041475
C2cd2l	8912.63	0.348916	0.103448	3.37287	0.000743877	0.00750453
C2cd3	4249.58	-0.0646566	0.105239	-0.614379	0.538965	0.620241
C2cd4c	625.824	0.576798	0.294517	1.95845	0.050177	0.0994427
C2cd5	13915.4	-0.213009	0.0904944	-2.35384	0.0185807	0.0498891
C3ar1	183.755	0.0757827	0.181735	0.416995	0.676682	0.742048
C4b	894.532	0.846006	0.250038	3.38351	0.000715649	0.00735633
C7	286.933	-0.500715	0.263516	-1.90013	0.0574161	0.109236
CAAA01180111.1	4252.51	-0.393252	0.134357	-2.92693	0.0034233	0.0180092
Caap1	3439.11	-0.503252	0.158682	-3.17145	0.00151677	0.0112064
Cab39	22058.1	-0.253337	0.0755928	-3.35134	0.000804212	0.00792688
Cab39l	4146.76	-0.350236	0.128169	-2.73261	0.00628352	0.0257178
Cabin1	13209.3	0.0575826	0.152972	0.376425	0.706601	0.766903
Cables1	3763.44	0.0205007	0.123672	0.165767	0.86834	0.898903
Cables2	2253.34	0.0252558	0.0872535	0.289453	0.772235	0.820868
Cabp1	9488.7	-0.0389196	0.108459	-0.35884	0.719714	0.777124
Cabp7	928.28	0.738439	0.21966	3.36173	0.000774559	0.00770584
Cacfd1	1665.75	0.376306	0.154666	2.43302	0.0149735	0.0434599
Cachd1	1886.65	-0.103068	0.130833	-0.787789	0.43082	0.518524
Cacna1a	23421.5	-0.222662	0.100143	-2.22345	0.0261857	0.0624454
Cacna1b	22761.1	-0.121197	0.130327	-0.929946	0.352399	0.442059
Cacna1c	44850.4	-0.321083	0.199074	-1.61289	0.106769	0.172847
Cacna1d	21718	-0.481809	0.139419	-3.45584	0.000548583	0.00643315
Cacna1e	76673.5	-0.243871	0.0960038	-2.54023	0.011078	0.0361072
Cacna1g	5249.64	0.410016	0.216523	1.89364	0.0582734	0.110517
Cacna1h	4875.4	0.778078	0.233438	3.33312	0.000858778	0.00828007
Cacna1i	10214	0.391904	0.220642	1.7762	0.0757001	0.133275
Cacna2d1	80389.2	-0.547505	0.154635	-3.54062	0.00039919	0.00542746
Cacna2d2	3540.61	0.478427	0.169358	2.82494	0.00472889	0.0218338
Cacna2d3	71325.8	-0.176638	0.169685	-1.04098	0.297887	0.386528
Cacna2d4	334.714	-0.000340835	0.119898	-0.0028427	0.997732	0.998278
Cacnb1	7009.93	0.463866	0.15984	2.90207	0.00370708	0.0189033
Cacnb2	43572.8	-0.286695	0.166497	-1.72193	0.085083	0.145909
Cacnb3	11704.3	0.15334	0.0955214	1.6053	0.108428	0.174891
Cacnb4	57739.8	-0.538399	0.117813	-4.56993	4.87883e-06	0.000460822
Cacng2	7562.27	-0.238144	0.162872	-1.46215	0.143699	0.216905
Cacng3	10961.7	-0.447265	0.127831	-3.49887	0.000467241	0.00585201
Cacng4	2842.78	0.256128	0.245421	1.04362	0.296659	0.385208
Cacng5	1299.99	0.453259	0.240174	1.88721	0.0591316	0.111582
Cacng7	3758.27	0.322384	0.133677	2.41167	0.0158797	0.0450475
Cacng8	3705.23	0.299801	0.150303	1.99464	0.0460822	0.0937024
Cactin	1308.28	0.580423	0.171866	3.37718	0.000732335	0.00745385
Cacul1	8641.63	-0.203682	0.072591	-2.80589	0.00501783	0.022679
Cacybp	6613.46	-0.246492	0.179422	-1.37381	0.1695	0.246595
Cad	1206.59	0.693988	0.221801	3.12888	0.00175475	0.012291
Cadm1	47101.1	-0.305993	0.0978726	-3.12644	0.00176939	0.0123485
Cadm2	355134	-0.686566	0.241754	-2.83994	0.00451224	0.0213418
Cadm3	27112.8	-0.00368307	0.0930119	-0.0395979	0.968414	0.977197
Cadm4	8551.16	0.836506	0.276045	3.03033	0.00244287	0.0148864
Cadps	93604.6	-0.472934	0.117587	-4.02199	5.77097e-05	0.00185047
Cadps2	31285.8	-0.562982	0.163746	-3.43814	0.000585731	0.00664469
Cage1	904.355	-0.340175	0.134392	-2.53122	0.0113666	0.0366309
Calb1	9967.99	-0.174631	0.135687	-1.28701	0.19809	0.279392
Calb2	918.899	0.844826	0.397882	2.12331	0.0337279	0.0747082
Calcoco1	4158.07	0.0253053	0.10762	0.235135	0.814104	0.854863
Calcrl	1241.89	-0.550542	0.198238	-2.77718	0.0054833	0.0238698
Cald1	3116.16	-0.30138	0.256744	-1.17385	0.240453	0.32592
Calhm2	860.131	0.0323372	0.100141	0.322918	0.746758	0.799299
Calm1	253622	-0.0121463	0.119424	-0.101707	0.918989	0.939176
Calm2	123613	-0.110983	0.0919054	-1.20757	0.227211	0.312071
Calm3	92031.6	0.381513	0.163524	2.33307	0.0196445	0.0517889
Caln1	28111.1	0.0973809	0.112354	0.866734	0.386088	0.474734
Calr	28262.3	0.434434	0.152752	2.84405	0.00445435	0.021151
Calu	7251.68	-0.00893682	0.0715496	-0.124904	0.9006	0.924518
Caly	7495.84	0.627104	0.172398	3.63753	0.000275261	0.00444969
Camk1	4632.23	0.345482	0.15535	2.22389	0.0261556	0.0624434
Camk1d	29689.3	-0.462991	0.114522	-4.0428	5.28171e-05	0.00173712
Camk1g	2556.47	0.518986	0.123049	4.21773	2.46771e-05	0.00116073
Camk2a	68987.6	0.204685	0.136497	1.49956	0.133728	0.205205
Camk2b	50128	0.311952	0.106574	2.9271	0.00342137	0.0180092
Camk2d	16879.7	-0.282662	0.126034	-2.24274	0.0249138	0.0602432
Camk2g	20325.2	-0.116166	0.0761678	-1.52514	0.127225	0.197395
Camk2n1	71669.9	0.001524	0.131756	0.0115668	0.990771	0.993491
Camk2n2	1561.86	0.556073	0.183387	3.03223	0.00242752	0.0148388
Camk4	64186.8	-0.628182	0.16762	-3.74765	0.000178496	0.00340911
Camkk1	6996.19	0.479994	0.203739	2.35593	0.0184766	0.0496931
Camkk2	19869.4	0.0601964	0.129441	0.465048	0.641897	0.711344
Camkmt	6632.13	-0.571695	0.140871	-4.0583	4.94311e-05	0.00168598
Camkv	24363.3	0.617128	0.192773	3.20132	0.00136798	0.0105929
Caml	2838.02	0.037152	0.11481	0.323596	0.746244	0.798882
Camsap1	12598.7	0.00882655	0.0671173	0.131509	0.895372	0.921
Camsap2	32675.7	-0.358514	0.151853	-2.36093	0.0182289	0.0492235
Camsap3	1480.97	0.157522	0.108488	1.45198	0.146506	0.220055
Camta1	33263.1	-0.27379	0.112138	-2.44155	0.0146243	0.042835
Camta2	9227.02	0.283405	0.114651	2.47191	0.0134395	0.0404957
Cand1	18714.9	-0.0547404	0.08096	-0.676141	0.498951	0.582869
Cand2	276.251	0.369335	0.165469	2.23205	0.0256116	0.0613854
Cant1	2739.21	0.559403	0.159693	3.50299	0.000460073	0.00578748
Canx	39711.6	-0.0735164	0.0975668	-0.753498	0.451151	0.538083
Cap1	18655.9	0.0424815	0.101831	0.417178	0.676548	0.742028
Cap2	28605.8	-0.270189	0.121022	-2.23257	0.0255773	0.0613395
Capn1	1220.73	0.209122	0.131029	1.596	0.110489	0.17732
Capn10	1526.69	0.466397	0.204468	2.28102	0.0225473	0.0563527
Capn15	3316.19	0.435101	0.177418	2.45241	0.0141903	0.0420744
Capn2	5228.95	-0.0714454	0.0851974	-0.838586	0.401702	0.490585
Capn3	449.362	0.0298568	0.0911414	0.327588	0.743223	0.796715
Capn5	2837.12	0.0664351	0.08882	0.747975	0.454476	0.541191
Capn6	409.584	-0.420997	0.219778	-1.91556	0.0554218	0.106562
Capn7	5614.73	-0.324097	0.106265	-3.04988	0.00228934	0.014374
Capns1	4879.34	0.344848	0.135841	2.53862	0.0111291	0.0361845
Caprin1	25663.6	-0.167515	0.101634	-1.64822	0.0993071	0.164046
Caprin2	1263.64	-0.490412	0.158641	-3.09133	0.00199265	0.0132162
Capza1	4210.14	-0.219976	0.0811899	-2.70941	0.0067404	0.0268121
Capza2	20692.8	-0.305827	0.108959	-2.8068	0.00500364	0.0226527
Capzb	10737.1	-0.109112	0.157599	-0.692337	0.488726	0.573753
Car10	60746.3	-0.799867	0.146746	-5.4507	5.0172e-08	3.05667e-05
Car11	7937.12	0.369714	0.132085	2.79906	0.00512523	0.0229497
Car12	1813.25	0.576457	0.166196	3.46854	0.000523287	0.00625236
Car14	410.864	0.149295	0.16593	0.899749	0.368254	0.457393
Car2	11170.9	-0.165833	0.0975604	-1.69979	0.0891699	0.151125
Car4	1416.93	-0.21406	0.135234	-1.58288	0.113449	0.180936
Car5b	360.74	-0.376348	0.119178	-3.15787	0.00158925	0.0114745
Car7	2082.18	-0.0885593	0.0865914	-1.02273	0.306438	0.395178
Car8	1110.75	-0.490415	0.127221	-3.85483	0.000115811	0.00275918
Card19	347.223	0.207886	0.152845	1.36011	0.173795	0.251588
Carf	4304.44	-0.351361	0.10425	-3.37036	0.000750693	0.00753664
Carhsp1	2469.65	0.771786	0.211841	3.64324	0.000269226	0.00437672
Carkd	3130.23	0.262304	0.122604	2.13944	0.0324	0.0725964
Carm1	4140.56	0.13946	0.0993102	1.40429	0.160234	0.235961
Carmil3	1842.02	0.541827	0.202789	2.67188	0.00754286	0.028602
Carnmt1	2089.1	-0.382312	0.0994713	-3.84344	0.000121321	0.00283242
Carns1	494.028	0.207637	0.111698	1.85891	0.0630396	0.116871
Cars	4035.71	0.136196	0.0886796	1.53582	0.124583	0.19438
Cars2	1102.22	0.447023	0.143251	3.12056	0.00180507	0.0124465
Cartpt	616.666	1.36096	0.354569	3.83836	0.000123858	0.00285272
Casc1	164.974	-0.144538	0.166962	-0.865698	0.386656	0.475196
Casc3	3743.91	0.0776552	0.0827985	0.937882	0.348305	0.437958
Casc4	17193.1	-0.478654	0.141467	-3.38349	0.000715705	0.00735633
Casd1	7464.01	-0.193593	0.0872106	-2.21983	0.0264301	0.0628982
Cask	25604.2	-0.444762	0.117399	-3.78847	0.000151576	0.00312119
Caskin1	6223.92	0.62735	0.179173	3.50137	0.000462875	0.00580591
Caskin2	1126.99	0.753523	0.267262	2.81942	0.00481112	0.0221018
Casp2	1413.34	-0.0637721	0.0681454	-0.935823	0.349364	0.43903
Casp3	812.796	-0.399996	0.12254	-3.26421	0.00109769	0.00928215
Casp6	135.242	0.252558	0.192324	1.31319	0.18912	0.269413
Casp7	376.169	-0.0401791	0.107409	-0.374075	0.708349	0.768018
Casp8	371.274	-0.324782	0.164336	-1.97633	0.0481171	0.0963245
Casp8ap2	3840.66	-0.514787	0.222116	-2.31764	0.0204687	0.0532377
Casp9	1094.36	0.28541	0.163786	1.74258	0.0814067	0.140793
Casq2	315.219	-0.172626	0.113579	-1.51987	0.128543	0.199029
Cast	1790.46	-0.410762	0.155833	-2.6359	0.00839135	0.0304072
Casz1	212.728	0.623428	0.207763	3.00067	0.00269387	0.0157032
Cat	4257.2	-0.0620138	0.227422	-0.272681	0.785098	0.831089
Catip	211.607	-0.0854243	0.213388	-0.400323	0.688918	0.752371
Catsper2	653.392	-0.326827	0.106181	-3.07802	0.00208378	0.0135743
Catsperz	256.43	-0.104792	0.20553	-0.50986	0.610149	0.683081
Cav1	943.057	-0.203048	0.0930856	-2.1813	0.029161	0.0671621
Cav2	2914.61	-0.155219	0.341727	-0.454221	0.64967	0.718275
Cbarp	10470.5	0.860454	0.267041	3.22217	0.00127222	0.0101035
Cbfa2t2	8775.4	-0.221003	0.0598256	-3.69412	0.00022065	0.00388842
Cbfa2t3	960.711	0.343265	0.151677	2.26314	0.0236273	0.0582556
Cbfb	2627.47	-0.412934	0.141347	-2.92142	0.00348443	0.018181
Cbl	7137.68	-0.0673895	0.0854259	-0.788865	0.430191	0.518059
Cblb	6559.31	-0.403369	0.126028	-3.20063	0.00137128	0.0105929
Cbll1	2568.27	-0.451343	0.190055	-2.3748	0.0175587	0.0480114
Cbln1	233.048	0.451717	0.194129	2.3269	0.0199707	0.0523228
Cbln2	3030.4	0.159461	0.147711	1.07955	0.280344	0.368362
Cbln4	727.098	0.355481	0.141946	2.50434	0.0122679	0.0382842
Cbr1	2194.57	0.379635	0.140564	2.7008	0.00691733	0.0271508
Cbr3	484.765	0.802884	0.225667	3.55782	0.00037394	0.00523036
Cbr4	1431.82	-0.0334104	0.0628827	-0.531313	0.595202	0.668863
Cbs	1168.35	0.732576	0.130278	5.62319	1.87465e-08	1.84495e-05
Cbwd1	2031.18	-0.295008	0.112468	-2.62305	0.00871466	0.0311005
Cbx1	3185.99	0.112987	0.0879714	1.28437	0.199014	0.280478
Cbx2	164.585	0.309287	0.216863	1.42619	0.153815	0.22877
Cbx3	5298.96	-0.235247	0.129832	-1.81193	0.069997	0.126088
Cbx4	2855.9	0.378647	0.138256	2.73874	0.00616754	0.0254263
Cbx5	26237.3	0.0260756	0.061026	0.427287	0.66917	0.735828
Cbx6	249.01	0.932948	0.523594	1.78181	0.0747796	0.132328
Cbx7	2868.29	0.282827	0.143942	1.96486	0.0494303	0.0983978
Cbx8	493.4	0.5524	0.26027	2.12241	0.0338034	0.0748555
Cby1	2355.32	-0.141704	0.125761	-1.12677	0.25984	0.346941
Cc2d1a	3109.06	0.402184	0.148924	2.7006	0.00692156	0.0271508
Cc2d1b	2402.35	0.277139	0.164453	1.68522	0.0919461	0.154662
Cc2d2a	5606.78	-0.399099	0.146623	-2.72193	0.00649015	0.0262354
Ccar1	9794.92	-0.373024	0.205589	-1.81442	0.0696135	0.125721
Ccar2	6271.89	0.363049	0.151189	2.40129	0.0163373	0.0458981
Ccbe1	1837.63	-0.62098	0.149837	-4.14437	3.40748e-05	0.00139282
Ccbl1	822.812	0.379305	0.129801	2.92221	0.00347555	0.0181717
Ccbl2	471.573	-0.0317388	0.093526	-0.339358	0.73434	0.789707
Ccdc106	1653.45	0.384225	0.182548	2.10479	0.0353096	0.0772708
Ccdc107	905.438	0.38257	0.126202	3.0314	0.00243421	0.0148559
Ccdc112	1482.7	-0.389064	0.231065	-1.68379	0.0922226	0.154957
Ccdc113	407.629	-0.302308	0.19727	-1.53246	0.12541	0.195313
Ccdc115	1406.01	-0.0743163	0.134462	-0.552694	0.580473	0.655479
Ccdc117	1247.22	0.0273449	0.0973136	0.280997	0.778712	0.826038
Ccdc12	2017.63	0.582314	0.178281	3.26627	0.00108974	0.00927929
Ccdc120	605.112	0.252685	0.147708	1.71071	0.0871352	0.148582
Ccdc122	545.977	-0.444967	0.274473	-1.62117	0.104982	0.170774
Ccdc124	3105.69	0.660168	0.156977	4.20552	2.60481e-05	0.00118613
Ccdc126	1039.92	-0.117759	0.108911	-1.08125	0.279586	0.367591
Ccdc127	7994.25	-0.1554	0.0936617	-1.65916	0.0970836	0.161247
Ccdc129	334.478	-0.53847	0.208605	-2.58129	0.00984332	0.033547
Ccdc13	446.355	0.310209	0.117484	2.64044	0.00827977	0.0301586
Ccdc130	981.027	-0.000285361	0.115378	-0.00247328	0.998027	0.998417
Ccdc134	736.265	0.271806	0.162123	1.67654	0.093632	0.156661
Ccdc136	6350.41	-0.233164	0.0821277	-2.83904	0.00452494	0.0213624
Ccdc137	1322.54	0.151854	0.0556695	2.72779	0.00637611	0.0258888
Ccdc138	1044.12	-0.286203	0.195556	-1.46353	0.143322	0.216464
Ccdc14	514.721	-0.128575	0.134401	-0.956651	0.338743	0.428217
Ccdc141	4108.62	-0.438103	0.141407	-3.09818	0.00194715	0.0130497
Ccdc148	5553.42	-0.482327	0.213842	-2.25552	0.0241004	0.0589788
Ccdc149	5287.52	0.0121402	0.0779676	0.155708	0.876263	0.904835
Ccdc15	1050.88	-0.289901	0.189573	-1.52923	0.126207	0.196196
Ccdc151	448.944	0.188925	0.0965343	1.95708	0.0503382	0.09971
Ccdc155	336.003	0.10749	0.167762	0.640731	0.521698	0.604528
Ccdc157	2147.4	0.173027	0.161275	1.07287	0.283328	0.371442
Ccdc159	657.135	0.275858	0.224776	1.22726	0.219726	0.303944
Ccdc160	170.006	-0.521871	0.231892	-2.25049	0.0244176	0.0594254
Ccdc162	289.79	-0.104715	0.182538	-0.573658	0.566199	0.643907
Ccdc163	194.551	0.092255	0.100942	0.913937	0.36075	0.45011
Ccdc166	355.903	0.39002	0.189152	2.06194	0.0392134	0.0832967
Ccdc167	1369.05	0.110146	0.0804291	1.36948	0.17085	0.248162
Ccdc17	265.068	-0.136408	0.129795	-1.05095	0.29328	0.38179
Ccdc171	2007.51	-0.214709	0.17318	-1.2398	0.21505	0.298702
Ccdc173	753.117	-0.426505	0.200957	-2.12237	0.0338071	0.0748555
Ccdc174	2931.16	-0.395107	0.185635	-2.1284	0.0333036	0.0739862
Ccdc177	1508.92	0.31013	0.106529	2.91122	0.00360025	0.018561
Ccdc18	403.82	-0.436183	0.29105	-1.49865	0.133964	0.205434
Ccdc181	2364.49	-0.300959	0.199472	-1.50878	0.131354	0.202254
Ccdc184	1019.2	0.425562	0.230915	1.84294	0.0653382	0.120002
Ccdc186	8673.26	-0.277149	0.20379	-1.35998	0.173838	0.251593
Ccdc187	1264.64	0.83801	0.283545	2.95547	0.00312193	0.0170183
Ccdc190	458.593	0.118265	0.161065	0.734268	0.462785	0.549477
Ccdc191	1474.55	-0.371647	0.171066	-2.17254	0.0298147	0.0682867
Ccdc25	3888.58	-0.184546	0.108371	-1.7029	0.088587	0.150396
Ccdc28a	2147.89	-0.0899399	0.0567554	-1.58469	0.113036	0.180434
Ccdc28b	1395.54	0.319084	0.152696	2.08967	0.036647	0.0793041
Ccdc3	1246.11	-0.221037	0.10134	-2.18115	0.0291726	0.0671769
Ccdc30	3427.06	-0.273757	0.120043	-2.28049	0.0225784	0.0563865
Ccdc32	2681.52	-0.0930707	0.0783061	-1.18855	0.234617	0.319975
Ccdc34	2634.41	-0.4912	0.336279	-1.46069	0.1441	0.217407
Ccdc39	3204.23	-0.40989	0.18748	-2.18631	0.0287932	0.0665569
Ccdc43	1902.95	-7.57497e-05	0.0830065	-0.000912576	0.999272	0.999272
Ccdc47	9834.04	-0.483776	0.325635	-1.48564	0.137375	0.209459
Ccdc50	8935.67	-0.415678	0.12077	-3.44189	0.000577656	0.00660849
Ccdc51	483.708	0.394128	0.156297	2.52166	0.0116802	0.0371916
Ccdc57	2097.06	-0.0267412	0.131046	-0.204059	0.838307	0.874821
Ccdc58	1511.66	-0.257389	0.100183	-2.56918	0.010194	0.0343305
Ccdc59	2221.32	-0.123456	0.152174	-0.81128	0.417205	0.505274
Ccdc6	4337.14	0.0683225	0.0851832	0.802066	0.422515	0.510353
Ccdc61	509.456	0.668597	0.269268	2.48301	0.0130276	0.0397413
Ccdc62	474.66	-0.24771	0.169126	-1.46465	0.143017	0.216079
Ccdc65	615.955	-0.27358	0.118291	-2.31278	0.0207348	0.0535664
Ccdc66	3888.19	-0.501065	0.235427	-2.12832	0.0333104	0.0739884
Ccdc71	1726.48	0.416018	0.120301	3.45815	0.000543903	0.00640763
Ccdc71l	1415.46	-0.254371	0.149084	-1.70622	0.0879676	0.149634
Ccdc74a	832.218	0.299204	0.153493	1.94931	0.0512587	0.100898
Ccdc77	835.43	-0.243512	0.127666	-1.90741	0.0564676	0.107812
Ccdc79	679.593	-0.36496	0.114389	-3.19052	0.00142019	0.0107834
Ccdc80	973.021	-0.195834	0.159145	-1.23053	0.218498	0.302539
Ccdc82	3916.46	-0.337961	0.160932	-2.10002	0.0357267	0.0778404
Ccdc84	718.082	0.0889107	0.100229	0.887078	0.375037	0.463764
Ccdc85a	19622.4	-0.427066	0.131081	-3.25802	0.00112193	0.00938165
Ccdc85b	507.845	1.3651	0.994707	1.37236	0.169952	0.247135
Ccdc85c	4040.76	0.677052	0.201988	3.35193	0.000802489	0.0079221
Ccdc86	493.399	0.0741934	0.11565	0.641535	0.521175	0.604087
Ccdc87	194.013	-0.126768	0.172346	-0.735544	0.462009	0.548687
Ccdc88a	33247.4	-0.610279	0.256758	-2.37687	0.0174603	0.0478449
Ccdc88b	139.669	0.646781	0.281368	2.29871	0.0215217	0.0548189
Ccdc88c	4702.08	0.2448	0.103486	2.36553	0.0180045	0.0487822
Ccdc9	2113.16	0.391005	0.132299	2.95547	0.00312188	0.0170183
Ccdc90b	2081.71	-0.216881	0.230734	-0.939962	0.347237	0.436976
Ccdc91	5262.88	-0.150126	0.0843132	-1.78058	0.0749818	0.132539
Ccdc92	4192.38	0.240605	0.0679295	3.54198	0.000397136	0.00540833
Ccdc92b	2256	0.049312	0.0763388	0.645963	0.518303	0.601412
Ccdc93	3801.84	-0.11629	0.0710968	-1.63566	0.101911	0.167118
Ccdc94	565.22	0.516527	0.158199	3.26506	0.00109443	0.00927929
Ccdc96	157.711	-0.0193097	0.169239	-0.114097	0.909161	0.931215
Ccdc97	1603.5	0.719387	0.165572	4.34487	1.39358e-05	0.000837062
Cchcr1	291.617	0.142622	0.166406	0.857069	0.391407	0.480121
Cck	13651.1	0.0768363	0.240472	0.319522	0.74933	0.801382
Cckbr	3937.64	-0.209651	0.135941	-1.54222	0.123019	0.19248
Ccl25	1882.15	-0.170017	0.100128	-1.698	0.0895069	0.151656
Ccl27a	6415.09	-0.132946	0.106265	-1.25108	0.210906	0.293891
Ccl28	352.306	-0.494174	0.228473	-2.16294	0.0305457	0.0695872
Ccm2	3286.27	0.50361	0.182539	2.75892	0.00579934	0.0245929
Ccm2l	226.708	0.0691393	0.120257	0.574928	0.56534	0.643101
Ccnb1	269.977	0.9043	0.35917	2.51775	0.0118107	0.0374374
Ccnb1ip1	1250.68	1.43425	0.986413	1.45401	0.145944	0.219388
Ccnc	5825.9	-0.44029	0.181355	-2.42778	0.0151916	0.0437989
Ccnd1	2759.34	0.535173	0.114576	4.67091	2.99865e-06	0.000354034
Ccnd2	3323.18	-0.0140036	0.167056	-0.0838256	0.933195	0.949938
Ccnd3	934.122	0.696317	0.198353	3.51049	0.000447284	0.00570544
Ccndbp1	3016.29	0.107709	0.061736	1.74467	0.0810431	0.14044
Ccne1	986.876	0.141801	0.117852	1.20321	0.228895	0.313911
Ccne2	956.472	-0.514789	0.183015	-2.81282	0.00491094	0.0223778
Ccnf	317.371	0.373769	0.0990957	3.7718	0.000162076	0.00321489
Ccng1	10012.9	-0.433562	0.152619	-2.84082	0.00449977	0.0213222
Ccng2	3063.86	0.0618258	0.115182	0.536767	0.591429	0.665266
Ccnh	7138.01	-0.348844	0.150211	-2.32236	0.0202136	0.0527997
Ccni	13499	-0.13667	0.0632236	-2.1617	0.0306416	0.0697435
Ccnj	773.993	0.0793401	0.0931196	0.852023	0.394201	0.483085
Ccnjl	415.831	0.0814512	0.104933	0.776223	0.437617	0.524878
Ccnk	1729.76	0.0327625	0.0779614	0.420241	0.67431	0.740462
Ccnl1	4350.19	-0.189699	0.130691	-1.45151	0.146637	0.22017
Ccnl2	4700.74	0.100149	0.116322	0.860962	0.389259	0.477852
Ccnt1	5336.3	-0.11277	0.0519494	-2.17077	0.0299486	0.0685687
Ccnt2	10493.1	-0.202345	0.0721087	-2.80611	0.00501435	0.022679
Ccny	22706.4	-0.273292	0.0731775	-3.73465	0.000187978	0.00352122
Ccnyl1	3930.03	-0.395363	0.119531	-3.30761	0.000940963	0.00860109
Ccp110	7124.48	-0.19083	0.10266	-1.85885	0.0630485	0.116871
Ccpg1os	613.802	-0.118426	0.173461	-0.682726	0.49478	0.579695
Ccr5	260.051	-0.290557	0.121337	-2.39462	0.0166374	0.0463846
Ccs	1575.94	0.182269	0.105711	1.72422	0.0846686	0.145403
Ccsap	4376.5	0.0826424	0.09177	0.900538	0.367834	0.457122
Ccser1	90648.1	-0.569874	0.197257	-2.88899	0.00386477	0.0193758
Ccser2	17220.7	-0.249158	0.0953031	-2.61437	0.00893913	0.0316194
Cct2	10924.6	-0.135412	0.117866	-1.14886	0.250612	0.336961
Cct3	8076.58	0.289709	0.119055	2.4334	0.0149579	0.0434245
Cct4	6846.35	0.302711	0.142681	2.1216	0.0338713	0.0749479
Cct5	11706.4	0.239728	0.124602	1.92395	0.0543604	0.105074
Cct7	11222.9	0.456948	0.157813	2.8955	0.00378551	0.0191506
Cct8	12864.9	0.0757048	0.0773925	0.978194	0.327979	0.417113
Ccz1	2954.72	-0.0366834	0.102384	-0.358293	0.720124	0.777426
Cd151	1277.21	0.534567	0.2028	2.63593	0.00839074	0.0304072
Cd164	4796.91	-0.106295	0.0996886	-1.06627	0.286302	0.374457
Cd164l2	263.512	0.438053	0.193865	2.25958	0.0238472	0.0586058
Cd180	243.847	-0.557497	0.158257	-3.52272	0.000427136	0.00555943
Cd200	6775.14	-0.0462206	0.0946934	-0.488108	0.625473	0.696398
Cd200r1	132.26	-0.637037	0.255707	-2.49128	0.0127283	0.0391646
Cd248	167.098	0.0568604	0.203503	0.279408	0.779931	0.826988
Cd24a	482.182	-0.0666451	0.232626	-0.28649	0.774503	0.822623
Cd274	136.423	0.0154748	0.214888	0.0720131	0.942591	0.958017
Cd276	961.638	0.237957	0.108356	2.19607	0.0280871	0.0655143
Cd2ap	8984.7	-0.509607	0.176594	-2.88576	0.00390472	0.0195221
Cd2bp2	4956.87	0.262686	0.123373	2.1292	0.0332381	0.0739176
Cd300d	200.155	0.294488	0.163302	1.80334	0.0713356	0.127877
Cd302	970.018	-0.0329086	0.143921	-0.228657	0.819135	0.859018
Cd320	1021.2	0.201621	0.155801	1.2941	0.195631	0.276499
Cd33	460.244	-0.24892	0.168042	-1.4813	0.138528	0.21079
Cd34	5798.52	-0.358909	0.127928	-2.80556	0.00502298	0.0226888
Cd37	135.951	0.449932	0.173075	2.59964	0.00933203	0.0324528
Cd38	292.364	-0.18961	0.240594	-0.788091	0.430643	0.518382
Cd3eap	1466.28	-0.252322	0.18473	-1.3659	0.171971	0.249399
Cd4	578.15	0.260245	0.253848	1.0252	0.305269	0.393909
Cd44	247.93	-0.309494	0.267917	-1.15519	0.248014	0.334185
Cd46	5297.87	-0.644862	0.325268	-1.98256	0.0474168	0.0954541
Cd47	10866.4	-0.0559351	0.0960775	-0.582187	0.560441	0.638778
Cd53	579.325	-0.180796	0.099819	-1.81124	0.0701033	0.126218
Cd55	769.982	-0.320283	0.224675	-1.42554	0.154001	0.228944
Cd59a	314.855	-0.245184	0.205427	-1.19354	0.23266	0.317746
Cd59b	166.601	-0.289481	0.270325	-1.07086	0.284231	0.372358
Cd63	1033.29	0.267783	0.171779	1.55888	0.119025	0.187677
Cd68	500.204	0.194611	0.113074	1.72109	0.0852349	0.146062
Cd74	203.751	0.679779	0.374947	1.813	0.0698321	0.125939
Cd81	16864.4	0.407958	0.124288	3.28235	0.00102944	0.00902103
Cd82	854.039	0.518462	0.169533	3.05819	0.00222682	0.0141389
Cd83	935.755	0.219285	0.14966	1.46522	0.142861	0.215895
Cd84	440.153	-0.453466	0.196162	-2.31169	0.0207948	0.0536714
Cd86	227.402	-0.126354	0.145281	-0.869717	0.384455	0.473227
Cd9	2220.96	-0.0826519	0.141809	-0.58284	0.560001	0.638447
Cd93	720.191	-0.112833	0.146049	-0.772571	0.439777	0.526925
Cd99l2	7753.16	0.136759	0.0994714	1.37485	0.169177	0.246303
Cda	150.85	-0.0402989	0.19057	-0.211465	0.832525	0.870206
Cdadc1	4524.08	-0.176912	0.135214	-1.30838	0.190743	0.271188
Cdan1	1811.92	0.0526041	0.125419	0.419426	0.674905	0.740797
Cdc123	6497.36	-0.172424	0.0942762	-1.82892	0.0674118	0.122823
Cdc14a	638.691	-0.247054	0.189391	-1.30446	0.192075	0.272652
Cdc14b	2465	-0.180799	0.0741314	-2.4389	0.0147322	0.0430131
Cdc16	4791.11	-0.0909896	0.0942636	-0.965267	0.334411	0.423987
Cdc23	3907.75	0.0401083	0.0464071	0.864271	0.387439	0.476029
Cdc25a	391.734	0.00989553	0.115337	0.0857963	0.931628	0.948607
Cdc25b	680.563	0.0581665	0.157375	0.369604	0.711677	0.771039
Cdc26	1646.94	-0.201866	0.11336	-1.78075	0.0749536	0.132526
Cdc27	13065.7	-0.409676	0.11818	-3.46654	0.000527202	0.00628613
Cdc34	1933.1	0.478085	0.181769	2.63018	0.00853392	0.0306866
Cdc37	4414.05	0.572805	0.110983	5.16122	2.45347e-07	7.33896e-05
Cdc37l1	15662.7	-0.283899	0.118582	-2.3941	0.016661	0.04641
Cdc40	6223.13	-0.298686	0.101756	-2.93532	0.00333205	0.0177478
Cdc42	23714.3	-0.133784	0.0522093	-2.56245	0.0103935	0.0347659
Cdc42bpa	59170.1	-0.417761	0.163639	-2.55294	0.0106818	0.0353867
Cdc42bpb	14137.6	0.175286	0.0639986	2.73891	0.00616431	0.0254248
Cdc42bpg	184.756	0.608019	0.216943	2.80266	0.00506824	0.022808
Cdc42ep1	1026.19	0.539374	0.18822	2.86566	0.00416142	0.0203677
Cdc42ep2	666.453	0.263824	0.202761	1.30116	0.193204	0.27392
Cdc42ep3	1621.02	0.0271928	0.111851	0.243116	0.807915	0.849689
Cdc42ep4	1764.63	0.473751	0.185941	2.54786	0.0108384	0.0357099
Cdc42se1	3004.23	0.215038	0.111669	1.92567	0.0541453	0.104785
Cdc42se2	13124.2	0.0295532	0.138365	0.213589	0.830868	0.868829
Cdc45	135.19	0.0883372	0.175573	0.503135	0.614869	0.687358
Cdc5l	6172.52	-0.0506247	0.076658	-0.660397	0.508999	0.592821
Cdc7	1498.62	-0.119782	0.122911	-0.974546	0.329786	0.419078
Cdc73	10327.2	-0.467199	0.158668	-2.94452	0.00323461	0.0174757
Cdca4	677.392	0.0705357	0.0866187	0.814325	0.415459	0.503541
Cdca7	220.917	0.21216	0.118651	1.78811	0.0737591	0.131212
Cdh10	32610.1	-0.607928	0.187487	-3.24252	0.0011848	0.00966727
Cdh11	31350.1	-0.503488	0.152088	-3.31049	0.000931319	0.00857245
Cdh12	45028.3	-0.997249	0.203185	-4.90807	9.19751e-07	0.000168104
Cdh13	18344.9	-0.174675	0.14236	-1.227	0.219822	0.304011
Cdh18	52960.6	-0.632567	0.196081	-3.22605	0.00125513	0.0100489
Cdh19	2390.22	-0.355626	0.229438	-1.54999	0.121144	0.190384
Cdh2	30304.7	-0.501112	0.113458	-4.41673	1.00205e-05	0.000690652
Cdh20	11786.9	-0.530111	0.18134	-2.92331	0.00346335	0.018145
Cdh22	3023.09	0.558877	0.190006	2.94136	0.00326774	0.0175779
Cdh23	229.145	0.598389	0.240585	2.48723	0.0128744	0.0394432
Cdh24	544.207	0.28474	0.13423	2.12129	0.0338977	0.0749934
Cdh4	5394.71	0.176921	0.198594	0.890872	0.372998	0.461924
Cdh5	1067.94	-0.0211933	0.194227	-0.109116	0.913111	0.934438
Cdh6	7226.68	-0.596589	0.14114	-4.22692	2.36915e-05	0.001131
Cdh7	7299.59	-0.325179	0.178827	-1.8184	0.069003	0.124922
Cdh8	25381.9	-0.400652	0.220923	-1.81354	0.0697487	0.125862
Cdh9	12235.4	-0.569034	0.222366	-2.559	0.0104974	0.034984
Cdhr1	727.895	0.300111	0.324712	0.924237	0.355363	0.444995
Cdhr3	148.059	-0.0965715	0.126406	-0.763982	0.444878	0.531991
Cdip1	13118.4	0.230916	0.148671	1.5532	0.120377	0.189294
Cdipt	5558.48	0.410692	0.173383	2.3687	0.0178506	0.048509
Cdk11b	4770.04	-0.289598	0.246463	-1.17502	0.239988	0.325531
Cdk12	10460.7	-0.477022	0.125804	-3.79178	0.000149574	0.00311163
Cdk13	18801.7	-0.512714	0.177479	-2.88886	0.00386638	0.0193758
Cdk14	38052.2	-0.45303	0.0908742	-4.98524	6.1884e-07	0.000134194
Cdk16	12498.3	-0.0796829	0.095731	-0.832363	0.405204	0.494052
Cdk17	35294.1	-0.277283	0.0985513	-2.81359	0.0048992	0.0223619
Cdk18	1733.99	0.279913	0.172707	1.62073	0.105075	0.170831
Cdk19	10540.4	-0.263713	0.081158	-3.24937	0.0011566	0.00955128
Cdk20	407.924	0.537375	0.280986	1.91246	0.0558174	0.107017
Cdk2ap1	1904.6	0.483382	0.228651	2.11406	0.0345105	0.075916
Cdk2ap2	605.641	0.873914	0.267791	3.26341	0.00110079	0.00928989
Cdk4	2018.11	0.201822	0.101882	1.98093	0.0475986	0.0956758
Cdk5	5010.57	0.235146	0.0985529	2.38599	0.0170332	0.0470979
Cdk5r1	15667.5	0.326239	0.121206	2.69162	0.00711068	0.0275679
Cdk5rap1	1307.05	-0.0906489	0.0859	-1.05528	0.291295	0.379785
Cdk5rap2	3610.57	-0.144924	0.0797517	-1.81719	0.0691885	0.125116
Cdk5rap3	1116.72	0.22293	0.100393	2.22056	0.0263806	0.0628302
Cdk6	693.233	-0.311548	0.136278	-2.28611	0.0222476	0.0558788
Cdk7	2861.71	-0.0950834	0.0713474	-1.33268	0.182636	0.261804
Cdk8	8084.2	-0.375109	0.0976124	-3.84284	0.00012162	0.00283242
Cdk9	3515.83	0.217692	0.0972908	2.23754	0.0252512	0.0608292
Cdkal1	11228.2	-0.345421	0.133563	-2.58621	0.00970384	0.0332488
Cdkl1	1796.88	-0.157511	0.0807744	-1.95001	0.0511754	0.100821
Cdkl2	3831.87	-0.25971	0.0817798	-3.17572	0.00149463	0.0111112
Cdkl3	1731.16	-0.201169	0.119485	-1.68363	0.0922537	0.154957
Cdkl4	1463.72	-0.272014	0.114078	-2.38446	0.0171041	0.0472431
Cdkl5	43138.2	-0.5097	0.105797	-4.8177	1.45222e-06	0.000221247
Cdkn1a	497.867	0.877574	0.227398	3.85921	0.000113755	0.00273582
Cdkn1b	3004.9	-0.00885263	0.0922163	-0.0959985	0.923522	0.942067
Cdkn1c	292.907	-0.253645	0.290872	-0.872016	0.3832	0.471999
Cdkn2aip	2189.15	-0.594106	0.223326	-2.66026	0.00780804	0.0292246
Cdkn2aipnl	2470.4	0.00768952	0.108092	0.0711386	0.943287	0.958572
Cdkn2c	158.681	0.0194276	0.148545	0.130786	0.895945	0.921131
Cdkn2d	1757.56	0.370648	0.144744	2.56071	0.0104457	0.0348663
Cdo1	1878.26	0.072414	0.111572	0.649034	0.516317	0.599651
Cdon	3014.85	-0.282477	0.0947099	-2.98255	0.00285859	0.0162258
Cdpf1	521.487	0.300471	0.199361	1.50717	0.131767	0.202721
Cdr2	952.153	-0.1156	0.112549	-1.02711	0.30437	0.393027
Cdr2l	1910.93	0.0924928	0.14168	0.652829	0.513867	0.597353
Cds1	7265.45	-0.0440045	0.0735421	-0.598358	0.549601	0.629282
Cds2	33354.7	0.436811	0.161598	2.70308	0.00687006	0.0270614
Cdv3	5958.05	-0.0521364	0.066999	-0.778166	0.436471	0.523749
Cdyl	5280.11	-0.382735	0.0823654	-4.6468	3.37129e-06	0.000376755
Cdyl2	2555.72	-0.257907	0.144596	-1.78364	0.0744828	0.131912
Ceacam1	288.014	-0.399005	0.273667	-1.45799	0.144842	0.218218
Cebpa	193.552	0.652439	0.310351	2.10226	0.0355303	0.0775843
Cebpg	3158.53	-0.256655	0.0912713	-2.81201	0.00492337	0.0224083
Cebpz	4532.74	-0.159666	0.153701	-1.0388	0.298895	0.387522
Cebpzos	858.459	0.202415	0.138746	1.45889	0.144594	0.217947
Cecr2	843.81	-0.500858	0.147713	-3.39076	0.000696995	0.00729138
Cecr5	3685.48	0.104097	0.109021	0.954834	0.339662	0.429071
Cecr6	3728.45	0.191697	0.134853	1.42153	0.155164	0.230378
Celf1	26291.7	-0.199714	0.0686086	-2.91092	0.00360368	0.018561
Celf2	470084	-0.514308	0.162493	-3.16511	0.00155026	0.0113014
Celf3	6264.31	0.338195	0.151236	2.23621	0.0253383	0.060946
Celf4	52363.9	-0.0578535	0.100074	-0.578104	0.563194	0.641002
Celf5	9708.58	0.20263	0.109614	1.84858	0.0645189	0.118976
Celf6	1458.52	0.27629	0.126447	2.18502	0.0288873	0.0667124
Celsr1	502.742	0.569712	0.157557	3.6159	0.000299301	0.00464836
Celsr2	16450.7	0.573287	0.220879	2.59549	0.00944574	0.0327155
Celsr3	5378.78	0.355007	0.185364	1.91519	0.0554679	0.106587
Cemip	3819.32	-0.429848	0.118543	-3.62609	0.00028775	0.00456442
Cend1	16802.6	0.0545801	0.113935	0.479044	0.631907	0.702124
Cenpc1	5367.38	-0.406449	0.189909	-2.14023	0.0323363	0.0724917
Cenpe	242.07	-0.504083	0.337984	-1.49144	0.135845	0.207697
Cenpj	454.517	-0.242362	0.184247	-1.31542	0.188369	0.268642
Cenpk	226.74	-0.414314	0.273636	-1.51411	0.129999	0.200628
Cenpo	579.121	0.074594	0.0851141	0.8764	0.380812	0.469511
Cenpp	873.375	-0.313762	0.250296	-1.25356	0.210001	0.293256
Cenpq	517.435	-0.269728	0.234098	-1.1522	0.249239	0.335553
Cenpt	768.967	0.308585	0.119728	2.57738	0.00995515	0.033829
Cenpu	328.424	-0.174868	0.118564	-1.47488	0.140244	0.212719
Cenpv	1784.75	0.0901453	0.112935	0.798207	0.42475	0.512714
Cenpw	298.548	-0.194584	0.158277	-1.2294	0.218924	0.302998
Cep104	2247.11	0.218339	0.0812384	2.68764	0.00719599	0.0277808
Cep112	9061.36	-0.299937	0.210162	-1.42717	0.153531	0.228431
Cep120	5585.87	-0.193626	0.0948905	-2.04052	0.0412987	0.08669
Cep126	4493.76	-0.465725	0.18364	-2.53608	0.0112102	0.0363393
Cep128	2349.92	-0.421499	0.195615	-2.15474	0.0311821	0.070597
Cep131	1556.9	0.414019	0.221106	1.87249	0.0611383	0.114374
Cep135	1839.48	-0.185856	0.147244	-1.26223	0.206866	0.289599
Cep152	752.053	-0.1404	0.0959989	-1.46252	0.1436	0.216806
Cep162	3915.43	-0.479522	0.194671	-2.46325	0.0137685	0.0412153
Cep164	2371.65	-0.0694191	0.123805	-0.560713	0.574993	0.651245
Cep170	20547.4	-0.504579	0.180281	-2.79885	0.00512844	0.0229497
Cep170b	15573.9	0.506281	0.168397	3.00648	0.00264294	0.0155394
Cep19	5292.98	-0.211148	0.141454	-1.49269	0.135517	0.207319
Cep192	1907.41	-0.493497	0.144161	-3.42324	0.000618793	0.00684803
Cep250	3655.93	-0.153006	0.147779	-1.03537	0.300495	0.389241
Cep290	7427.41	-0.518924	0.343981	-1.50858	0.131406	0.202287
Cep295	6824.62	-0.367964	0.142209	-2.58749	0.00966778	0.0331964
Cep350	16573.8	-0.441559	0.155699	-2.83598	0.00456856	0.021489
Cep41	691.838	-0.0317436	0.140188	-0.226437	0.820862	0.860405
Cep44	1641.06	-0.256843	0.113476	-2.26342	0.0236098	0.0582348
Cep57	2009.88	-0.210042	0.142954	-1.4693	0.141753	0.214549
Cep57l1	1441.24	-0.316243	0.104946	-3.01339	0.0025835	0.0153594
Cep63	2962.98	-0.0533813	0.0840156	-0.635375	0.525184	0.607853
Cep68	3044.54	0.0116014	0.0710027	0.163394	0.870208	0.900182
Cep70	4251.76	-0.351269	0.140739	-2.4959	0.0125639	0.0388737
Cep72	163.049	-0.127675	0.148755	-0.858287	0.390734	0.479433
Cep76	799.108	-0.245425	0.116749	-2.10216	0.0355393	0.0775843
Cep78	1988.45	-0.321175	0.118571	-2.70871	0.0067546	0.026838
Cep83	9856.37	-0.517224	0.158219	-3.26904	0.00107912	0.00926593
Cep85	2345.68	-0.103924	0.0666976	-1.55814	0.1192	0.187843
Cep85l	8500.12	-0.519404	0.17038	-3.0485	0.00229986	0.014374
Cep89	1472.98	0.0605676	0.0827369	0.73205	0.464138	0.550699
Cep95	1887.75	-0.20904	0.0971102	-2.1526	0.03135	0.0708894
Cep97	2880.48	-0.0751762	0.0970533	-0.774587	0.438584	0.525889
Cept1	6588.17	-0.288012	0.0970368	-2.96808	0.00299671	0.0166623
Cercam	348.087	0.339133	0.176493	1.92151	0.054667	0.105519
Cerk	4980.46	0.0684747	0.069672	0.982815	0.325698	0.414791
Cerkl	701.644	-0.472484	0.162597	-2.90586	0.00366242	0.0187602
Cers1	3944.49	0.341409	0.149045	2.29065	0.0219837	0.0554882
Cers2	2624.82	0.277723	0.0993309	2.79594	0.00517496	0.023037
Cers4	6204.34	-0.327324	0.140474	-2.33014	0.0197988	0.0520286
Cers5	4382.74	-0.0710468	0.0737517	-0.963325	0.335385	0.425087
Cers6	16602.2	-0.356346	0.0780594	-4.56506	4.99349e-06	0.000460822
Cetn2	2941.39	-0.257247	0.164162	-1.56703	0.117107	0.185211
Cetn3	6705.03	-0.441214	0.179392	-2.4595	0.0139132	0.0415609
Cetn4	767.629	-0.420081	0.251771	-1.66851	0.0952149	0.158658
Cfap100	393.367	0.192707	0.126707	1.52088	0.128289	0.198804
Cfap20	3977.77	-0.220724	0.128503	-1.71765	0.0858602	0.146858
Cfap206	266.436	-0.264205	0.188468	-1.40186	0.160958	0.236783
Cfap36	9576.13	-0.210099	0.142449	-1.47491	0.140236	0.212719
Cfap43	167.118	0.272739	0.168699	1.61672	0.105939	0.171806
Cfap44	578.248	0.0711656	0.22903	0.310726	0.756009	0.807108
Cfap45	370.179	-0.0230515	0.176704	-0.130453	0.896208	0.921193
Cfap46	511.669	0.0921099	0.20956	0.439539	0.660271	0.727105
Cfap54	3007.79	-0.217312	0.140838	-1.543	0.122831	0.192349
Cfap61	436.639	-0.130924	0.114294	-1.14551	0.251999	0.338202
Cfap65	282.662	-0.163681	0.197986	-0.826728	0.408391	0.496858
Cfap69	3327.83	-0.498505	0.134543	-3.70518	0.000211241	0.00377988
Cfap70	201.852	-0.220458	0.186013	-1.18518	0.235948	0.321003
Cfap74	1354.21	-0.137228	0.089024	-1.54148	0.123201	0.192623
Cfap97	4025.9	-0.253581	0.156072	-1.62477	0.104211	0.169823
Cfap99	357.185	-0.147386	0.118443	-1.24437	0.213364	0.296845
Cfdp1	7226.71	-0.37072	0.179486	-2.06545	0.0388802	0.0829278
Cfh	2793.71	-0.127183	0.22908	-0.555193	0.578763	0.654298
Cfl1	42257	0.31192	0.142928	2.18235	0.0290834	0.0670438
Cfl2	5423.46	-0.228125	0.0978614	-2.3311	0.0197481	0.0519551
Cflar	2167.1	-0.0380931	0.117128	-0.325226	0.74501	0.79799
Cfp	475.656	-0.04671	0.17124	-0.272776	0.785026	0.831081
Cftr	359.657	-0.0406554	0.256509	-0.158495	0.874067	0.902989
Cggbp1	6514.5	-0.355956	0.145188	-2.4517	0.0142183	0.0421047
Cgn	401.253	0.305205	0.182695	1.67057	0.0948063	0.158039
Cgnl1	1745.09	-0.293117	0.179841	-1.62987	0.103129	0.168596
Cgref1	1195.43	0.149272	0.128537	1.16132	0.245513	0.331479
Cgrrf1	1749.47	-0.0734458	0.0751654	-0.977123	0.328508	0.417704
CH25-588N10.2	1468.06	-0.328556	0.148023	-2.21962	0.0264444	0.0628982
CH36-200G6.4	4537.16	-0.179772	0.0644246	-2.79043	0.00526377	0.023275
Chac1	523.976	0.755964	0.242266	3.12039	0.00180613	0.0124465
Chac2	956.502	-0.242676	0.112381	-2.1594	0.030819	0.0700352
Chadl	641.433	0.559244	0.204233	2.73826	0.00617656	0.0254502
Chaf1a	351.644	0.067873	0.129482	0.524188	0.600148	0.673475
Champ1	3255.15	0.0725455	0.0755073	0.960775	0.336665	0.42617
Chat	339.281	0.877389	0.274215	3.19964	0.00137599	0.0105987
Chchd1	1188.55	0.497443	0.22722	2.18926	0.0285782	0.0662853
Chchd10	8514.02	0.282962	0.181117	1.56231	0.118215	0.186652
Chchd3	14611.7	-0.278356	0.0972435	-2.86246	0.00420367	0.0204772
Chchd4	1757.96	0.394548	0.206946	1.90652	0.0565823	0.107998
Chchd5	599.827	0.0846814	0.126235	0.670824	0.502332	0.586123
Chchd6	9141.78	-0.14639	0.132845	-1.10195	0.270481	0.358337
Chchd7	1880.47	-0.170089	0.0810862	-2.09763	0.0359377	0.0781818
Chd1	17332.8	-0.450878	0.163191	-2.76288	0.00572939	0.0244292
Chd1l	1021.84	-0.0182446	0.0917771	-0.198793	0.842425	0.878115
Chd2	17876	-0.358689	0.0997514	-3.59583	0.000323361	0.00486144
Chd3	40926.2	0.498635	0.1502	3.31981	0.000900785	0.00844915
Chd3os	7697.61	-0.201736	0.121649	-1.65835	0.0972472	0.161435
Chd4	20212.7	-0.0650491	0.0745911	-0.872076	0.383167	0.471999
Chd5	21262.7	0.17902	0.10514	1.70268	0.0886277	0.150445
Chd6	23198.5	-0.363325	0.123151	-2.95025	0.00317516	0.0172086
Chd7	3022.19	-0.0568686	0.13133	-0.433019	0.665001	0.731684
Chd8	12852.4	-0.126292	0.0876016	-1.44166	0.149398	0.223347
Chd9	27476.6	-0.443679	0.116057	-3.82292	0.000131879	0.00292927
CHDC2	802.688	-0.551518	0.215255	-2.56216	0.0104024	0.0347659
Chdh	381.181	-0.218598	0.183632	-1.19041	0.233885	0.319215
Chek1	150.292	-0.22922	0.197636	-1.15981	0.246125	0.332165
Cherp	2051.66	0.385296	0.130539	2.95157	0.00316161	0.0171834
Chfr	4612.27	-0.237961	0.0882122	-2.6976	0.0069841	0.027282
Chga	9488.22	0.262052	0.104091	2.51752	0.0118184	0.0374374
Chgb	45674	-0.580311	0.291335	-1.99191	0.0463814	0.0941462
Chic1	7291.13	-0.370715	0.127885	-2.89882	0.00374574	0.019039
Chic2	3515.88	-0.349007	0.103668	-3.36659	0.000761028	0.00760671
Chid1	4764.5	0.218092	0.150745	1.44676	0.147963	0.221642
Chil1	492.198	-0.0252309	0.127401	-0.198043	0.843011	0.878501
Chka	7512.07	-0.2915	0.0617111	-4.72363	2.3167e-06	0.000302447
Chl1	27765.3	-0.411487	0.16434	-2.50387	0.0122842	0.0383167
Chm	15689.9	-0.551974	0.211344	-2.61173	0.0090085	0.031725
Chmp1a	3967.9	0.7243	0.271065	2.67205	0.00753894	0.0285959
Chmp2a	6215.67	-0.186773	0.154984	-1.20511	0.228161	0.313137
Chmp2b	3426.15	-0.0752113	0.105957	-0.70983	0.47781	0.563263
Chmp3	12281.1	-0.24368	0.090998	-2.67786	0.00740936	0.0282971
Chmp4b	8732.65	0.192296	0.136676	1.40694	0.159444	0.235123
Chmp5	5739.32	0.0457867	0.0729376	0.627752	0.530166	0.612137
Chmp6	1399.78	0.549877	0.218586	2.51561	0.0118825	0.0375464
Chmp7	5602.45	0.07617	0.0802338	0.949351	0.342442	0.432072
Chn1	84718.8	-0.208181	0.0914033	-2.27761	0.0227498	0.056704
Chn2	7423.95	-0.135322	0.117743	-1.14929	0.250435	0.33688
Chordc1	10534	-0.28245	0.125461	-2.2513	0.0243665	0.059346
Chp1	7770.37	0.184659	0.096593	1.91172	0.0559117	0.107102
Chpf	3536.12	0.989848	0.347555	2.84803	0.00439909	0.0209929
Chpf2	4960	0.482208	0.272633	1.76871	0.0769428	0.134832
Chpt1	8643.52	-0.562517	0.200339	-2.80782	0.00498777	0.0226049
Chrac1	760.606	0.369786	0.188177	1.96509	0.0494034	0.0983762
Chrd	1426.67	0.406766	0.268038	1.51757	0.129123	0.199683
Chrdl1	1607.39	-0.68285	0.17956	-3.80292	0.000143002	0.00302885
Chrm1	9993.9	0.169414	0.0812173	2.08594	0.0369841	0.0798337
Chrm2	6844.09	-0.557734	0.156493	-3.56396	0.000365299	0.00518141
Chrm3	45415.1	-0.737447	0.17616	-4.18624	2.83609e-05	0.00123839
Chrm4	1243.9	0.133546	0.171456	0.778896	0.436041	0.523331
Chrna4	3247.85	0.0493458	0.10547	0.467865	0.639881	0.709414
Chrna5	249.954	-0.186584	0.228632	-0.816092	0.414448	0.502601
Chrna7	4716.1	-0.33903	0.112901	-3.0029	0.00267422	0.0156228
Chrnb2	3795.38	0.272595	0.107996	2.52411	0.011599	0.0370187
Chst1	8423.32	0.529203	0.149928	3.52971	0.000416019	0.00554877
Chst10	4746.48	0.21124	0.0898211	2.35178	0.0186836	0.0500501
Chst11	6746.69	0.071824	0.112808	0.636692	0.524326	0.607024
Chst12	856.229	0.356331	0.101443	3.51264	0.000443674	0.00567637
Chst2	9417.66	0.176294	0.066896	2.63535	0.00840516	0.0304133
Chst3	181.851	0.310953	0.140226	2.21751	0.0265884	0.0631118
Chst8	954.281	0.258698	0.203311	1.27243	0.203222	0.285246
Chst9	499.405	-0.161112	0.238122	-0.676593	0.498664	0.582693
Chsy1	3107.21	-0.191658	0.0826042	-2.32019	0.0203304	0.0529642
Chsy3	47416.5	-0.593587	0.154889	-3.83233	0.000126936	0.00287947
Chtf8	4682.44	0.346864	0.143253	2.42134	0.0154633	0.0443353
Chtop	10038.3	0.200914	0.0983483	2.04288	0.0410638	0.0862678
Chuk	5870.25	-0.24185	0.0873444	-2.76892	0.00562424	0.0242115
Churc1	299.466	0.698185	0.354444	1.9698	0.0488613	0.0974941
Ciao1	4163.64	-0.0882479	0.0883032	-0.999374	0.317613	0.406558
Ciapin1	2617.7	0.424032	0.186745	2.27064	0.0231685	0.0574676
Ciart	789.312	-0.00603848	0.177734	-0.0339748	0.972897	0.980098
Cib1	381.715	0.940959	0.281791	3.33921	0.000840179	0.00818056
Cib2	1054.29	0.281728	0.154101	1.8282	0.067519	0.122879
Cic	7647.46	0.623059	0.212881	2.92679	0.00342476	0.0180092
Cinp	3561.43	0.0931692	0.0818266	1.13862	0.254863	0.341478
Cipc	8666.79	0.014197	0.0463779	0.306116	0.759516	0.809973
Cir1	3105.59	-0.480456	0.193322	-2.48526	0.0129456	0.0395666
Cirbp	3600.98	0.40629	0.188299	2.15769	0.0309522	0.0702505
Cisd1	4065.96	0.550911	0.243143	2.26579	0.0234645	0.0579437
Cisd2	4771.74	-0.21269	0.0772428	-2.75353	0.00589567	0.02483
Cisd3	885.752	-0.023381	0.152253	-0.153566	0.877952	0.906286
Cish	190.313	0.20851	0.211116	0.987657	0.323321	0.412502
Cit	10545.3	-0.0252064	0.101412	-0.248555	0.803705	0.846444
Cited2	1086.06	0.412068	0.11832	3.48267	0.000496441	0.00609548
Cited4	308.526	0.460457	0.257966	1.78495	0.0742688	0.131752
Ciz1	3450.24	-0.172111	0.137703	-1.24987	0.211347	0.294358
Ckap4	1109.48	0.242489	0.0953926	2.54201	0.0110216	0.0360334
Ckap5	28981.4	-0.29648	0.12331	-2.40434	0.0162018	0.0456979
Ckb	69946.8	0.704984	0.231202	3.04921	0.00229441	0.014374
Cklf	274.443	-0.0154595	0.12754	-0.121213	0.903523	0.926576
Ckmt1	12329.3	0.209395	0.0901559	2.32259	0.0202013	0.0527784
Clasp1	19091.7	-0.178126	0.0569374	-3.12846	0.00175725	0.0122988
Clasp2	50995.8	-0.212551	0.0582018	-3.65197	0.000260233	0.00428496
Clasrp	2669.6	0.197809	0.127787	1.54795	0.121633	0.190989
Clcc1	2222.94	0.0674402	0.0513956	1.31218	0.189459	0.269777
Clcn1	748.259	-0.319178	0.115854	-2.755	0.00586923	0.0247743
Clcn2	3048.98	0.211018	0.159038	1.32684	0.184562	0.263978
Clcn3	23657	-0.174072	0.068904	-2.5263	0.0115272	0.0368974
Clcn4	21364	-0.244982	0.165537	-1.47992	0.138894	0.211221
Clcn5	2049.65	-0.219594	0.0819047	-2.6811	0.00733816	0.0281422
Clcn6	6818.79	0.219439	0.0993494	2.20876	0.027191	0.0641258
Clcn7	3527.53	0.399215	0.195005	2.0472	0.040638	0.0856686
Cldn10	1926.73	0.0612705	0.0878976	0.697068	0.48576	0.570795
Cldn11	6289.46	0.552813	0.16564	3.33744	0.000845542	0.00820156
Cldn12	4971.95	-0.139987	0.105615	-1.32544	0.185024	0.264492
Cldn34c1	1091.31	-0.604044	0.197643	-3.05624	0.0022413	0.0141899
Cldn5	1546.6	0.530909	0.279931	1.89657	0.0578846	0.10991
Cldnd1	2249.73	0.204347	0.125028	1.6344	0.102174	0.167442
Clec11a	274.342	0.248128	0.178008	1.39392	0.163343	0.23968
Clec14a	374.864	-0.251122	0.153151	-1.6397	0.101068	0.166053
Clec16a	12828.5	-0.163389	0.0639362	-2.5555	0.0106035	0.0352016
Clec18a	450.197	0.0707672	0.186376	0.3797	0.704168	0.765041
Clec2d	970.556	-0.080465	0.147649	-0.544973	0.585772	0.659948
Clec2l	2492.5	0.285147	0.178512	1.59736	0.110186	0.177017
Clec5a	148.149	-0.316472	0.207402	-1.52589	0.127038	0.1972
[truncated: 10,794 more rows]

## Sheet: DEG_WT_SD|RS
Gene	baseMean	log2FoldChange	lfcSE	stat	pvalue	padj
0610009O20Rik	3415.43	-0.0484128	0.0507333	-0.954261	0.339952	0.936571
1810055G02Rik	1602.07	0.0148057	0.133224	0.111134	0.91151	0.994782
2410015M20Rik	3069.74	-0.0132872	0.200397	-0.0663044	0.947136	0.997743
2510009E07Rik	6709.02	0.252447	0.136529	1.84903	0.064453	0.702138
2700062C07Rik	1120.47	0.154498	0.113004	1.36719	0.171567	0.843824
2810403A07Rik	7014.6	0.00401312	0.0561054	0.0715281	0.942977	0.997617
2900055J20Rik	1235.78	0.0838986	0.0935767	0.896576	0.369945	0.941721
3110082I17Rik	1646.5	-0.161492	0.136184	-1.18583	0.235688	0.892764
8030462N17Rik	16315	0.114411	0.107271	1.06656	0.28617	0.91822
9130011E15Rik	4390.82	0.041221	0.104978	0.392664	0.694567	0.98804
9930104L06Rik	1617.75	-0.153863	0.0825415	-1.86406	0.0623128	0.695433
9930111J21Rik2	362.266	0.64311	0.402318	1.59851	0.109929	0.776947
A2m	237.677	-0.665053	0.244506	-2.71999	0.00652843	0.300123
A4galt	423.695	-0.301589	0.177102	-1.70291	0.0885847	0.753692
Aaas	937.976	0.0407346	0.0752339	0.54144	0.588205	0.974146
Aacs	3597.05	-0.0215733	0.117219	-0.184043	0.85398	0.989951
Aaed1	1376.2	0.108421	0.0899715	1.20506	0.22818	0.889282
Aagab	6872.55	-0.0919432	0.0729666	-1.26007	0.207643	0.882187
Aak1	44406.8	0.0401034	0.0609656	0.657804	0.510664	0.96572
Aamdc	1741.57	-0.00408477	0.0701323	-0.0582438	0.953554	0.997819
Aamp	10131.6	-0.0834106	0.101697	-0.820186	0.41211	0.947603
Aar2	3190.1	-0.0781835	0.0877711	-0.890766	0.373055	0.942077
Aard	161.011	0.119141	0.139248	0.855607	0.392215	0.945027
Aars	14755	0.00711409	0.0674697	0.105441	0.916026	0.995413
Aars2	2577.86	-0.0820604	0.10074	-0.814573	0.415317	0.947603
Aasdh	1292.76	0.020241	0.0661704	0.305893	0.759686	0.988678
Aasdhppt	3717.05	0.137513	0.0919115	1.49615	0.134614	0.809059
Aass	486.558	0.0644604	0.104727	0.615509	0.538219	0.966859
Aatf	3939.04	-0.0188286	0.0880394	-0.213865	0.830652	0.988895
Aatk	20479.4	0.00800344	0.142024	0.0563526	0.955061	0.997819
Abat	24421.7	0.107327	0.0896484	1.1972	0.231229	0.890568
Abca1	7007.74	-0.113967	0.115321	-0.98826	0.323025	0.929872
Abca17	229.155	0.319993	0.14251	2.24541	0.0247419	0.532015
Abca2	23325.2	0.0982227	0.0889008	1.10486	0.269221	0.909343
Abca3	10665.2	0.0531075	0.0635304	0.835939	0.403189	0.947603
Abca4	553.515	-0.175339	0.151478	-1.15752	0.24706	0.897977
Abca5	9344.42	0.0589549	0.0744439	0.791937	0.428398	0.948075
Abca6	415.397	0.164454	0.138613	1.18643	0.235453	0.892764
Abca7	2265.95	-0.0344139	0.108518	-0.317126	0.751148	0.988678
Abca8a	953.423	0.0883103	0.133683	0.660595	0.508872	0.965661
Abca8b	5719.52	0.295804	0.175954	1.68115	0.0927343	0.759517
Abca9	1503.07	-0.200601	0.0959417	-2.09087	0.0365399	0.602676
Abcb10	2252.03	-0.0554383	0.0882212	-0.628401	0.529741	0.966753
Abcb1a	3799.39	-0.058029	0.0951815	-0.609667	0.542083	0.966859
Abcb1b	800.259	0.0251928	0.117761	0.213933	0.8306	0.988895
Abcb4	1149.31	0.393962	0.108823	3.62021	0.00029436	0.0476037
Abcb7	7038.31	0.101611	0.0896244	1.13375	0.256901	0.901586
Abcb8	3362.69	0.0611112	0.120057	0.509017	0.61074	0.977387
Abcb9	5262.59	-0.0367612	0.135756	-0.270788	0.786554	0.988678
Abcc1	3537.33	-0.0212488	0.089969	-0.236179	0.813293	0.988796
Abcc10	903.103	-0.0454258	0.133291	-0.340801	0.733253	0.988678
Abcc3	247.737	-0.0908366	0.12366	-0.734569	0.462602	0.955699
Abcc4	3323.72	-0.143523	0.135785	-1.05699	0.290518	0.920188
Abcc5	18361.1	-0.0443639	0.0784914	-0.565208	0.571933	0.971429
Abcc6	207.189	-0.046869	0.166902	-0.280817	0.778851	0.988678
Abcc8	2897.87	0.0231699	0.0995746	0.232689	0.816003	0.988895
Abcc9	1087.41	0.0174402	0.0899909	0.1938	0.846333	0.988895
Abcd1	1066.73	0.0307792	0.0600374	0.512668	0.608184	0.977387
Abcd2	6894.55	0.0942013	0.105218	0.895295	0.370629	0.94194
Abcd3	7968.85	0.00234806	0.0428821	0.0547561	0.956333	0.997819
Abcd4	837.97	-0.260482	0.114208	-2.28076	0.0225624	0.511302
Abce1	12014.8	0.141614	0.123913	1.14285	0.253099	0.901586
Abcf1	7346.31	0.0127507	0.100716	0.126601	0.899256	0.994016
Abcf2	7814.54	0.0245225	0.0861799	0.28455	0.775989	0.988678
Abcf3	5256.14	-0.0513069	0.0556629	-0.921743	0.356663	0.938374
Abcg1	8871.23	-0.00162543	0.0619159	-0.0262522	0.979056	0.99881
Abcg2	2601.19	-0.105299	0.0946966	-1.11196	0.266154	0.906573
Abcg4	3329.5	0.0540889	0.0812924	0.665363	0.505818	0.963784
Abhd10	2443.55	-0.0132209	0.068127	-0.194062	0.846127	0.988895
Abhd11	1251.67	-0.0278931	0.146517	-0.190374	0.849016	0.98931
Abhd12	22439.8	0.0157402	0.0863394	0.182307	0.855342	0.990678
Abhd13	4836.22	0.0396035	0.0617779	0.641063	0.521482	0.966753
Abhd14a	2450.35	-0.12043	0.100109	-1.20299	0.228981	0.889282
Abhd14b	903.789	-0.051925	0.0840186	-0.618019	0.536563	0.966859
Abhd16a	5164.56	-0.0198162	0.127336	-0.155622	0.876331	0.992501
Abhd17a	6132.6	-0.133903	0.367764	-0.3641	0.715783	0.988223
Abhd17b	3960.99	0.0838393	0.0834402	1.00478	0.315002	0.926863
Abhd17c	2396.65	-0.0449303	0.0749398	-0.599552	0.548805	0.96693
Abhd2	19609.2	0.0995188	0.0828429	1.2013	0.229636	0.889455
Abhd3	4652.19	0.0573847	0.084274	0.68093	0.495916	0.962081
Abhd4	3432.6	0.0669986	0.0704322	0.951249	0.341478	0.936571
Abhd5	1958.8	0.0254451	0.0806634	0.315448	0.752421	0.988678
Abhd6	3679.05	-0.106423	0.0767845	-1.38599	0.16575	0.839351
Abhd8	13899.9	-0.238623	0.261419	-0.9128	0.361348	0.938683
Abi1	16219.9	0.0965831	0.0803082	1.20266	0.229109	0.889282
Abi2	36276.6	0.0679343	0.0827689	0.820771	0.411777	0.947603
Abi3	376.361	-0.000958222	0.118565	-0.0080818	0.993552	0.999178
Abi3bp	5899.97	1.0134	0.375072	2.70187	0.00689514	0.302492
Abl1	6773.16	-0.0536667	0.113973	-0.470873	0.637732	0.981199
Abl2	11890	-0.0498366	0.0762012	-0.654014	0.513103	0.966403
Ablim1	19321.2	0.0225745	0.112752	0.200213	0.841314	0.988895
Ablim2	22888.1	-0.077278	0.0972045	-0.795004	0.426611	0.948075
Ablim3	3908.54	-0.0546798	0.179007	-0.305462	0.760014	0.988678
Abr	43775.5	0.0143349	0.072364	0.198095	0.842971	0.988895
Abracl	850.898	-0.0927599	0.0843745	-1.09938	0.271601	0.911284
Abt1	1296.58	-0.0401105	0.149599	-0.268119	0.788608	0.988678
Abtb1	2363.3	-0.0241764	0.141936	-0.170334	0.864748	0.991423
Abtb2	2089.68	-0.0231166	0.120917	-0.191177	0.848387	0.988895
AC074312.5	1526.11	0.0282057	0.059541	0.473718	0.635701	0.981199
AC074335.4	161.846	0.205783	0.262437	0.784124	0.432967	0.948238
AC090443.3	1292.47	0.224244	0.152123	1.4741	0.140454	0.819107
AC092855.1	194.418	-0.0879558	0.128392	-0.685057	0.493308	0.961401
AC099860.1	5806.94	0.00972602	0.0906923	0.107242	0.914597	0.994841
AC102077.1	658.841	0.0490504	0.0916056	0.535452	0.592337	0.974689
AC102096.1	2476.3	-0.0467519	0.0615871	-0.759119	0.447782	0.951802
AC102506.1	669.183	-0.0264476	0.0775595	-0.340997	0.733106	0.988678
AC102628.1	2466.83	0.200966	0.137607	1.46043	0.144171	0.821555
AC103620.3	40201.4	-0.0127506	0.103145	-0.123618	0.901618	0.994016
AC103635.1	33838.5	0.356693	0.16325	2.18495	0.0288925	0.565202
AC104325.1	5691.29	-0.0520077	0.203312	-0.255803	0.798103	0.988678
AC107707.3	459.912	-0.0344943	0.132493	-0.260347	0.794596	0.988678
AC109152.2	1329.47	-0.000232011	0.103649	-0.00223843	0.998214	0.999602
AC110508.1	458.944	0.0986451	0.11914	0.827978	0.407683	0.947603
AC113182.4	897.129	0.0101188	0.0798819	0.126673	0.8992	0.994016
AC114005.5	7834.07	-0.0294299	0.0667303	-0.441027	0.659193	0.983688
AC114558.6	410.488	0.161782	0.164534	0.983272	0.325474	0.9304
AC114920.2	3223.15	0.117664	0.0807739	1.4567	0.145199	0.823067
AC116475.2	681.888	0.110705	0.118797	0.931879	0.351399	0.938374
AC116718.1	647.082	0.2742	0.167921	1.63292	0.102486	0.769386
AC117750.1	683.194	0.195485	0.225141	0.868278	0.385242	0.943846
AC121113.1	5566.95	0.142787	0.104519	1.36614	0.171894	0.844423
AC121838.2	18860	-0.121913	0.0600491	-2.03022	0.0423344	0.632152
AC122423.2	162.886	-0.0306069	0.125047	-0.244764	0.806639	0.988678
AC123679.2	4527.54	0.101936	0.103962	0.98051	0.326834	0.9304
AC123684.1	1594.61	-0.0960384	0.129965	-0.738955	0.459934	0.953404
AC123686.4	1406.34	-0.0846975	0.0959185	-0.883015	0.377228	0.942601
AC124566.2	1515.29	-0.0470208	0.0537289	-0.875149	0.381493	0.9427
AC124713.2	3649.69	0.0157069	0.0731684	0.214668	0.830026	0.988895
AC125061.1	2250.95	-0.272056	0.0770888	-3.52913	0.000416926	0.0569933
AC126938.1	37491.4	0.041254	0.0769252	0.536288	0.59176	0.9746
AC127333.1	4554.55	-0.00741905	0.0884742	-0.0838554	0.933171	0.997236
AC127339.2	1092.54	0.0444633	0.121222	0.366793	0.713774	0.988139
AC129188.1	2744.32	-0.319482	0.154677	-2.06548	0.0388775	0.622815
AC129337.1	2026.85	0.456387	0.0918487	4.9689	6.73354e-07	0.000727446
AC130827.2	19302	-0.0598634	0.130641	-0.458229	0.646788	0.982286
AC131791.1	344.725	0.170728	0.136213	1.25338	0.210066	0.8849
AC131992.1	4058	-0.0917026	0.154089	-0.595126	0.55176	0.967324
AC132242.1	1448.82	0.22947	0.102533	2.23801	0.0252207	0.534318
AC132303.1	376.18	0.0452644	0.107831	0.419772	0.674652	0.986375
AC136513.6	142.994	0.137372	0.122889	1.11785	0.26363	0.905231
AC139063.2	1509.74	0.136485	0.104964	1.3003	0.193498	0.868876
AC139867.2	416.104	0.0333629	0.090021	0.370612	0.710927	0.98804
AC140321.1	27988.6	0.0782182	0.1307	0.598457	0.549535	0.96693
AC141209.3	267.626	-0.0125191	0.171061	-0.073185	0.941659	0.997617
AC153919.1	458.766	0.108749	0.150452	0.722815	0.469794	0.956592
AC155158.1	2764.66	-0.135003	0.123899	-1.08962	0.275879	0.912603
AC157555.1	10389.3	0.204318	0.103017	1.98334	0.0473293	0.651572
AC157561.9	866.867	0.0660505	0.0662026	0.997702	0.318424	0.927513
AC157667.1	8139.5	-0.000751084	0.0902209	-0.00832495	0.993358	0.999178
AC157774.6	2007.38	-0.168686	0.363711	-0.46379	0.642798	0.981766
AC158971.1	12890	0.0572584	0.0974145	0.587781	0.556679	0.968265
AC159257.5	2655.04	-0.0243819	0.10024	-0.243235	0.807823	0.988678
AC159266.3	388.501	0.188967	0.0979575	1.92907	0.0537218	0.670307
AC160535.1	7703.09	0.0644934	0.0647927	0.995381	0.319551	0.927513
AC161108.3	320.54	-0.0355295	0.13933	-0.255004	0.79872	0.988678
AC161207.1	3461.89	0.122214	0.0701395	1.74244	0.0814316	0.740828
AC161792.1	1592.66	0.0503634	0.0941594	0.534874	0.592737	0.974689
AC162528.2	5548.07	-0.122429	0.0834177	-1.46767	0.142195	0.820833
AC162689.1	480.236	0.24817	0.158112	1.56958	0.116512	0.786528
AC163329.3	1196.66	-0.408598	0.493297	-0.8283	0.4075	0.947603
AC163616.2	4497.54	-0.0272277	0.109453	-0.248761	0.803545	0.988678
AC163993.2	569.838	0.200606	0.137221	1.46192	0.143763	0.821555
AC164703.3	2606.23	-0.0223628	0.0968144	-0.230987	0.817325	0.988895
AC165086.3	6564.18	-0.0038546	0.0478007	-0.0806389	0.935729	0.997236
AC166328.1	4275.59	0.0749686	0.116775	0.641994	0.520877	0.966753
AC166332.1	10509.4	0.0412272	0.0863553	0.477414	0.633068	0.980826
AC167815.1	12514.5	0.0769371	0.0793195	0.969964	0.332065	0.934962
AC168051.1	2244.37	0.0968489	0.0737762	1.31274	0.189271	0.863981
Acaa1a	3855.55	-0.059406	0.15698	-0.378429	0.705112	0.98804
Acaa2	1317.74	0.0264925	0.111447	0.237714	0.812103	0.988678
Acaca	16116.5	0.0713802	0.0651477	1.09567	0.273224	0.911826
Acacb	462.784	-0.135376	0.138541	-0.977152	0.328494	0.9304
Acad10	731.857	-0.0440832	0.0987538	-0.446395	0.655312	0.983688
Acad11	2680.77	0.157751	0.0668922	2.35829	0.0183593	0.471334
Acad12	342.635	0.0232016	0.114281	0.203022	0.839118	0.988895
Acad8	2394.32	-0.0272305	0.0427041	-0.637656	0.523698	0.966753
Acad9	2925.87	-0.070424	0.0914213	-0.770323	0.441108	0.950558
Acadl	1458.89	-0.030241	0.12717	-0.2378	0.812036	0.988678
Acadm	2896.19	-0.0171566	0.069393	-0.247239	0.804723	0.988678
Acads	384.134	-0.0927441	0.184278	-0.503284	0.614765	0.977387
Acadsb	6916.91	0.153293	0.100629	1.52334	0.127674	0.807728
Acadvl	2927.81	-0.136229	0.0946023	-1.44002	0.149862	0.826376
Acan	527.746	-0.136182	0.14677	-0.927859	0.353481	0.938374
Acap2	28264.5	0.0444798	0.0863504	0.515109	0.606477	0.976657
Acap3	9604.92	-0.0757378	0.0912537	-0.82997	0.406556	0.947603
Acat1	9178.79	0.00987174	0.0507716	0.194434	0.845836	0.988895
Acat2	3504.6	0.150017	0.105764	1.41842	0.156069	0.831737
Acat3	642.43	-0.00929729	0.120241	-0.0773224	0.938367	0.997617
Acbd3	3480.21	0.0167116	0.0735905	0.227089	0.820355	0.988895
Acbd4	2347.03	-0.0848541	0.121134	-0.7005	0.483615	0.96033
Acbd5	9522.75	0.131578	0.107283	1.22645	0.220028	0.888889
Acbd6	8770.31	0.0325501	0.0706806	0.460524	0.64514	0.981903
Accs	335.309	0.176636	0.0853176	2.07034	0.0384209	0.61721
Acd	1626.02	-0.0821756	0.114388	-0.718395	0.472514	0.957285
Ace	1134.1	-0.186548	0.102684	-1.81671	0.0692609	0.714888
Ace2	136.17	0.0353369	0.14067	0.251205	0.801656	0.988678
Acer2	701.879	-0.043725	0.141052	-0.309992	0.756567	0.988678
Acer3	6370.95	0.226655	0.12424	1.82433	0.0681024	0.71221
Ache	3082.67	0.0909095	0.160943	0.564854	0.572173	0.971429
Acin1	11852.1	-0.0623033	0.0662704	-0.940137	0.347147	0.936571
Ackr1	1347.66	0.00693303	0.107192	0.0646785	0.94843	0.997813
Ackr2	306.463	-0.136029	0.158814	-0.856531	0.391704	0.945027
Ackr3	776.421	-0.472444	0.12909	-3.65981	0.000252398	0.0460857
Acly	17401.6	0.0308331	0.0575219	0.536023	0.591943	0.9746
Aco1	3833.6	0.0644592	0.0394926	1.63218	0.102641	0.769386
Aco2	37001.5	0.0473786	0.0680294	0.696442	0.486152	0.960416
Acot1	515.237	-0.0981659	0.182975	-0.536498	0.591615	0.9746
Acot11	3567.03	-0.00518667	0.0531481	-0.097589	0.922259	0.996039
Acot13	3380.55	0.0396538	0.148945	0.266231	0.790061	0.988678
Acot2	548.45	-0.0676787	0.163297	-0.414451	0.678544	0.987524
Acot3	223.507	0.00272266	0.189703	0.0143522	0.988549	0.999178
Acot5	188.125	-0.335345	0.212995	-1.57443	0.115388	0.786528
Acot6	571.249	0.0884298	0.124666	0.709331	0.478119	0.959134
Acot7	15242.9	-0.0290934	0.123398	-0.235768	0.813613	0.988895
Acot8	1188.69	-0.0773932	0.140442	-0.551069	0.581586	0.972385
Acot9	2201.23	0.117656	0.0851295	1.38208	0.166947	0.839529
Acox1	17387.8	-0.0147585	0.0559658	-0.263705	0.792007	0.988678
Acox3	2776.72	-0.0508175	0.0824499	-0.616344	0.537667	0.966859
Acp1	4853.81	0.0377607	0.056996	0.662515	0.507641	0.965406
Acp2	6102.67	-0.0163133	0.0624507	-0.261219	0.793924	0.988678
Acp6	1478.75	-0.0573586	0.0934504	-0.613786	0.539357	0.966859
Acrbp	509.561	-0.159231	0.106131	-1.50032	0.133532	0.80861
Acsbg1	10758.7	-0.0273269	0.0883064	-0.309455	0.756975	0.988678
Acsf2	589.631	-0.115022	0.0730058	-1.57553	0.115135	0.786528
Acsl1	6409.76	0.070498	0.0610399	1.15495	0.248111	0.898078
Acsl3	21479.3	0.0783609	0.139778	0.560611	0.575063	0.97212
Acsl4	13646.1	0.150828	0.0910446	1.65663	0.0975936	0.765861
Acsl5	6993.13	0.00976195	0.0784621	0.124416	0.900986	0.994016
Acsl6	24038.3	0.0184081	0.0701207	0.262521	0.79292	0.988678
Acss1	2791.51	0.00873043	0.0454048	0.19228	0.847523	0.988895
Acss2	4920.61	-0.00593495	0.0512271	-0.115856	0.907767	0.994019
Acss3	282.031	-0.224621	0.195492	-1.149	0.250556	0.899336
Acta1	596.797	-0.000229306	0.205068	-0.0011182	0.999108	0.999801
Acta2	1173.98	-0.482177	0.204947	-2.35269	0.0186383	0.471929
Actb	143430	0.0123271	0.120131	0.102614	0.918269	0.995703
Actg1	32540	-0.0296529	0.123483	-0.240137	0.810224	0.988678
Actl6a	1611.47	0.0193503	0.0476778	0.405855	0.684849	0.98804
Actl6b	4798.79	0.0299004	0.101234	0.295358	0.767721	0.988678
Actn1	8176.62	-0.0576959	0.085813	-0.672345	0.501364	0.962762
Actn2	3269.54	0.141284	0.186899	0.755934	0.449689	0.951822
Actn4	8355.11	0.0670591	0.0789062	0.849858	0.395404	0.945465
Actr10	10286.4	0.0122926	0.0910795	0.134966	0.892639	0.994016
Actr1a	15730.5	-0.0166948	0.0821358	-0.203258	0.838933	0.988895
Actr1b	21649.6	-0.0255143	0.0965897	-0.264151	0.791664	0.988678
Actr2	24104.3	0.00494989	0.0862263	0.0574058	0.954222	0.997819
Actr3	21458.2	-0.0243505	0.0518877	-0.469293	0.63886	0.981199
Actr3b	11109.8	0.170645	0.0679881	2.50993	0.0120756	0.396291
Actr5	1046.41	0.02857	0.118012	0.242093	0.808708	0.988678
Actr6	2024.65	0.0313453	0.0567686	0.552159	0.580839	0.972385
Actr8	5674.04	-0.0133936	0.0662964	-0.202027	0.839896	0.988895
Acvr1	4961.86	0.0604897	0.128052	0.472385	0.636652	0.981199
Acvr1b	10975	-0.00236304	0.0540491	-0.0437203	0.965127	0.997979
Acvr1c	6876.91	0.121391	0.126181	0.962035	0.336032	0.935837
Acvr2a	11923.5	0.135768	0.118979	1.14111	0.253824	0.901586
Acvr2b	875.029	-0.000342998	0.119415	-0.00287232	0.997708	0.999602
Acvrl1	1233.32	-0.0815553	0.156712	-0.520414	0.602775	0.975695
Acy1	787.26	-0.110334	0.148394	-0.743519	0.457168	0.952787
Acyp1	1569.53	-0.033435	0.0970214	-0.344615	0.730384	0.988678
Acyp2	9132.5	0.318849	0.142685	2.23463	0.0254417	0.534318
Adal	1924.14	-0.0785441	0.066395	-1.18298	0.236816	0.893056
Adam10	10337.5	0.0708413	0.093889	0.754522	0.450536	0.951822
Adam11	6179.42	-0.0363558	0.131056	-0.277406	0.781468	0.988678
Adam12	2134.96	-0.000524741	0.17592	-0.00298284	0.99762	0.999602
Adam15	4453.53	-0.00555153	0.103137	-0.0538266	0.957073	0.997949
Adam17	2316.27	-0.0522441	0.0689353	-0.757871	0.448528	0.951822
Adam18	453.197	0.654691	0.281317	2.32724	0.0199527	0.485949
Adam19	2485.31	-0.0674809	0.0756198	-0.892371	0.372194	0.942039
Adam21	186.255	0.0505921	0.179106	0.28247	0.777583	0.988678
Adam22	53321	0.141119	0.0832054	1.69603	0.0898803	0.753692
Adam23	29668.9	0.346767	0.0873256	3.97097	7.1582e-05	0.0204593
Adam32	336.305	0.298448	0.196958	1.51529	0.129699	0.80861
Adam33	358.821	-0.0221322	0.149436	-0.148105	0.88226	0.992501
Adam8	238.923	-0.406789	0.136331	-2.98384	0.00284659	0.181789
Adam9	6300.51	0.0207726	0.0700552	0.296517	0.766835	0.988678
Adamts1	970.526	0.15183	0.0890341	1.7053	0.0881385	0.753015
Adamts10	2004.09	-0.14301	0.095517	-1.49723	0.134335	0.80877
Adamts12	178.443	-0.136664	0.18196	-0.751065	0.452614	0.952082
Adamts15	553.898	0.0275148	0.0923339	0.297992	0.765709	0.988678
Adamts16	878.296	0.215282	0.162205	1.32722	0.184436	0.859401
Adamts17	3588.49	-0.0909651	0.169774	-0.535801	0.592096	0.9746
Adamts18	686.375	0.0917894	0.184732	0.496879	0.619274	0.978342
Adamts2	1281.11	-0.483304	0.117874	-4.10016	4.12863e-05	0.013724
Adamts20	2546.36	0.0719556	0.103913	0.692461	0.488648	0.960416
Adamts3	8112.89	0.330385	0.201411	1.64035	0.100932	0.768528
Adamts4	1364.74	0.0342205	0.117099	0.292236	0.770106	0.988678
Adamts5	300.584	-0.161418	0.116981	-1.37987	0.167627	0.840028
Adamts6	3000.6	0.512507	0.150419	3.40719	0.000656346	0.0774267
Adamts8	260.48	0.159106	0.134237	1.18526	0.235915	0.892764
Adamts9	820.207	-0.267151	0.148087	-1.80402	0.0712287	0.724091
Adamtsl1	2973	0.246023	0.147839	1.66413	0.0960869	0.762837
Adamtsl2	616.256	-0.0173072	0.113518	-0.152463	0.878822	0.992501
Adamtsl3	600.842	-0.42927	0.183199	-2.34319	0.0191197	0.478911
Adamtsl4	482.309	-0.114913	0.122206	-0.940325	0.347051	0.936571
Adamtsl5	395.251	-0.133392	0.141884	-0.940148	0.347142	0.936571
Adap1	14277.5	0.00159941	0.104285	0.0153369	0.987763	0.999178
Adap2	1087.77	-0.215256	0.0904013	-2.38112	0.0172603	0.461366
Adar	18962.6	0.0109155	0.0439902	0.248134	0.804031	0.988678
Adarb1	25001.3	0.0326166	0.0557444	0.585109	0.558474	0.969282
Adarb2	32405.1	0.255758	0.208176	1.22856	0.219236	0.888265
Adat1	796.453	0.0329144	0.066946	0.491656	0.622962	0.979664
Adat2	423.299	0.00655504	0.147553	0.0444249	0.964566	0.997979
Adck1	4647.17	-0.0129757	0.0928687	-0.139721	0.88888	0.993132
Adck2	1272.38	-0.0376661	0.114399	-0.329253	0.741965	0.988678
Adck3	2218.2	-0.0665156	0.105845	-0.628422	0.529727	0.966753
Adck4	1571.01	-0.10554	0.0800744	-1.31803	0.187493	0.860925
Adck5	946.236	-0.105685	0.105025	-1.00628	0.314279	0.926863
Adcy1	73715.7	-0.0439539	0.111724	-0.393415	0.694013	0.98804
Adcy2	39418.2	0.0921823	0.100526	0.917003	0.359141	0.938374
Adcy3	5637.3	0.0326565	0.099881	0.326954	0.743703	0.988678
Adcy4	254.135	-0.0746402	0.111133	-0.671631	0.501819	0.962762
Adcy5	34315.9	0.0736534	0.186993	0.393883	0.693668	0.98804
Adcy6	4129.98	-0.121548	0.0832085	-1.46077	0.14408	0.821555
Adcy7	664.093	0.0647237	0.100104	0.646566	0.517913	0.966753
Adcy8	8010.1	0.37318	0.144422	2.58395	0.00976763	0.364921
Adcy9	18556.8	-0.189647	0.118659	-1.59825	0.109987	0.776947
Adcyap1	1471.95	0.325929	0.106232	3.06809	0.00215429	0.151691
Adcyap1r1	12850.3	-0.153032	0.099487	-1.53821	0.123998	0.802149
Add1	35188.8	-0.0124291	0.0456819	-0.27208	0.78556	0.988678
Add2	39121.6	-0.019634	0.0508048	-0.386459	0.699157	0.98804
Add3	16158.2	0.0451967	0.0646461	0.699141	0.484464	0.960416
Adgra1	6465.08	-0.0198498	0.136097	-0.14585	0.88404	0.992501
Adgra2	1146.4	-0.354778	0.146865	-2.41568	0.0157058	0.440422
Adgra3	2457.78	0.0432991	0.0597675	0.724459	0.468784	0.956592
Adgrb1	31114.2	-0.109544	0.112371	-0.97484	0.32964	0.931644
Adgrb2	30382.6	-0.06192	0.131545	-0.470713	0.637845	0.981199
Adgrb3	165851	0.26902	0.156114	1.72323	0.0848477	0.747908
Adgrd1	691.572	0.10184	0.117505	0.866685	0.386115	0.944383
Adgre1	550.77	0.0481776	0.0807355	0.596734	0.550685	0.967224
Adgre5	987.906	-0.038673	0.0672131	-0.575378	0.565035	0.970857
Adgrf2	241.95	0.213094	0.230237	0.925542	0.354684	0.938374
Adgrf4	277.611	0.0754678	0.154033	0.489944	0.624173	0.979664
Adgrf5	4129.52	0.0786999	0.109058	0.721632	0.470521	0.956592
Adgrg1	3283.41	0.0174566	0.123489	0.141362	0.887584	0.993024
Adgrg6	948.615	0.393953	0.109349	3.6027	0.000314927	0.0480319
Adgrl1	52374.3	0.0164816	0.0697569	0.236273	0.813221	0.988796
Adgrl2	14590	0.00712805	0.104638	0.0681214	0.945689	0.997617
Adgrl3	104340	0.26731	0.14229	1.87863	0.0602949	0.687225
Adgrl4	3356.4	0.226764	0.147321	1.53926	0.123742	0.802149
Adgrv1	608.204	0.0393811	0.165053	0.238597	0.811418	0.988678
Adh5	3274.63	-0.00318778	0.0699637	-0.0455634	0.963658	0.997979
Adhfe1	1620.48	0.0401128	0.0668967	0.599624	0.548757	0.96693
Adi1	1182.41	-0.0962774	0.100594	-0.95709	0.338522	0.936571
Adipor1	5465.07	-0.0793878	0.0797421	-0.995557	0.319466	0.927513
Adipor2	6233.52	-0.19341	0.0630577	-3.06718	0.00216085	0.151691
Adk	13743.9	0.0710446	0.0982556	0.723059	0.469643	0.956592
Adnp2	3324.96	0.0407226	0.0577124	0.705613	0.480429	0.959601
Ado	5233.68	-0.0404973	0.0965105	-0.419615	0.674767	0.986375
Adora1	14966.2	-0.0130061	0.0972178	-0.133783	0.893575	0.994016
Adora2a	3393.44	0.156093	0.270657	0.576719	0.56413	0.970201
Adpgk	1717.68	-0.0405672	0.0730461	-0.555365	0.578645	0.97212
Adprh	4029.62	-0.0625485	0.145631	-0.429499	0.66756	0.985453
Adprhl2	1589.34	-0.155405	0.13303	-1.16819	0.242729	0.89523
Adprm	1435.65	0.130254	0.0768868	1.6941	0.0902466	0.753852
Adra1a	5130.74	0.102745	0.100271	1.02466	0.305522	0.92631
Adra1b	1480.2	-0.0935674	0.114705	-0.815725	0.414657	0.947603
Adra1d	1054.45	-0.204147	0.227296	-0.898156	0.369102	0.941541
Adra2a	900.694	-0.244945	0.162651	-1.50595	0.132079	0.80861
Adra2c	1963.5	-0.144642	0.296209	-0.488309	0.625331	0.979752
Adrb1	1076.75	0.0171282	0.10638	0.16101	0.872086	0.992501
Adrb2	140.337	-0.347234	0.139368	-2.4915	0.0127205	0.404883
Adrbk1	14574	-0.0338386	0.0974061	-0.347397	0.728293	0.988678
Adrbk2	12633.4	0.0324972	0.0693436	0.468641	0.639327	0.981199
Adrm1	2985.85	-0.0870839	0.130791	-0.665825	0.505523	0.963784
Adsl	2155.01	-0.0730207	0.0754398	-0.967934	0.333077	0.934962
Adss	9151.87	0.0309134	0.0679286	0.455086	0.649047	0.982399
Adssl1	1185.29	-0.0851828	0.0994623	-0.856434	0.391758	0.945027
Aebp1	1146.16	-0.758058	0.234036	-3.23907	0.00119922	0.108898
Aebp2	7280.67	0.0590924	0.0584122	1.01164	0.311709	0.92631
Aen	1457.21	-0.131584	0.0947296	-1.38905	0.164817	0.839234
Aes	15884.2	0.0262386	0.128044	0.204918	0.837636	0.988895
Afap1	2956.04	-0.0500482	0.093766	-0.533757	0.59351	0.974689
Afap1l1	2728.07	-0.140897	0.0934877	-1.50711	0.131782	0.80861
Afap1l2	1254.9	-0.0970106	0.110235	-0.880032	0.378842	0.942601
Aff1	2652.75	-0.0820642	0.118104	-0.694845	0.487153	0.960416
Aff2	9574.75	0.141158	0.158469	0.890758	0.373059	0.942077
Aff3	19824.9	-0.0667732	0.127614	-0.523242	0.600806	0.975695
Aff4	29524.9	0.0973346	0.0584198	1.66612	0.0956885	0.762167
Afg3l2	6926.24	-0.0125866	0.0592069	-0.212586	0.83165	0.988895
Aftph	12992.8	0.0308239	0.0756557	0.407424	0.683697	0.98804
Aga	658.087	-0.0459162	0.0913396	-0.502698	0.615177	0.977436
Agap1	24847.2	-0.0004343	0.124447	-0.00348984	0.997216	0.999602
Agap2	50424.9	0.0366059	0.114906	0.318573	0.75005	0.988678
Agap3	11559.3	-0.0529734	0.0913106	-0.580145	0.561817	0.969583
Agbl1	425.247	0.342747	0.214259	1.59969	0.109668	0.776947
Agbl3	1303.59	0.332947	0.133481	2.49435	0.0126189	0.404721
Agbl4	45462.5	0.372576	0.174384	2.13652	0.0326367	0.578913
Agbl5	864.421	0.0327201	0.133401	0.245276	0.806242	0.988678
Agfg1	16192.1	0.0423427	0.0619016	0.684032	0.493955	0.961401
Agfg2	3167.56	-0.0340042	0.108828	-0.312459	0.754691	0.988678
Aggf1	5787.22	-0.00409981	0.0825313	-0.0496758	0.960381	0.997979
Agk	5108.74	0.166228	0.0934281	1.77921	0.0752051	0.736677
Agl	4304.81	0.0872311	0.0505919	1.72421	0.08467	0.747908
Agmo	1852.32	0.243137	0.199103	1.22117	0.222023	0.889282
Ago1	5380.02	0.0049641	0.0500823	0.0991188	0.921044	0.995703
Ago2	11090.9	0.0033356	0.075246	0.0443293	0.964642	0.997979
Ago3	10424.9	0.0775912	0.105568	0.734985	0.462349	0.955506
Ago4	1872.84	0.0844042	0.108539	0.777637	0.436783	0.94928
Agpat1	10157.3	0.0022596	0.129908	0.0173939	0.986122	0.999178
Agpat3	18545.8	-0.0211889	0.0517503	-0.409445	0.682213	0.98804
Agpat4	5368.05	-0.0800447	0.0833417	-0.96044	0.336834	0.936571
Agpat5	6759.08	0.0336909	0.049856	0.675765	0.49919	0.962433
Agpat9	548.669	0.150893	0.0882569	1.7097	0.0873215	0.75211
Agps	8412.6	0.0670188	0.0644302	1.04018	0.298258	0.924353
Agrn	12499.2	-0.028059	0.10681	-0.2627	0.792782	0.988678
Agrp	155.336	-0.0225946	0.149996	-0.150635	0.880263	0.992501
Agt	713.685	-0.00519723	0.339457	-0.0153104	0.987785	0.999178
Agtpbp1	38361.6	0.0619733	0.0890649	0.695822	0.48654	0.960416
Agtrap	701.992	-0.169543	0.119399	-1.41997	0.155616	0.831212
Ahctf1	11596.4	-0.0348072	0.0592172	-0.587788	0.556675	0.968265
Ahcy	1448.77	0.00531579	0.111462	0.0476915	0.961962	0.997979
Ahcyl1	24379.7	-0.0350795	0.073168	-0.479438	0.631627	0.980826
Ahcyl2	19705.6	0.0539817	0.0774427	0.697054	0.485769	0.960416
Ahdc1	6833.34	-0.1331	0.114617	-1.16125	0.245539	0.896163
Ahi1	34475.3	0.215509	0.104081	2.07059	0.0383975	0.61721
Ahnak	10531	-0.334217	0.11491	-2.90851	0.00363154	0.214974
Ahnak2	157.388	-0.27526	0.199117	-1.3824	0.166848	0.839529
Ahr	1497.19	0.110857	0.0933019	1.18816	0.234771	0.892764
Ahsa1	8627.34	-0.0352178	0.140598	-0.250486	0.802212	0.988678
Ahsa2	2813.3	-0.088463	0.0679142	-1.30257	0.192722	0.868722
AI846148	2895.81	-0.0654269	0.0688414	-0.950401	0.341909	0.936571
Aida	3675.65	0.117269	0.100378	1.16827	0.242698	0.89523
Aif1	381.626	-0.0300043	0.118924	-0.252299	0.80081	0.988678
Aif1l	599.713	-0.101141	0.1356	-0.745881	0.455739	0.952475
Aifm1	2891.96	-0.00818371	0.0651454	-0.125622	0.900031	0.994016
Aifm2	563.9	0.0752965	0.139044	0.541531	0.588141	0.974146
Aifm3	7192.72	-0.214121	0.114249	-1.87416	0.0609086	0.688587
Aig1	10972.5	-0.00898227	0.109203	-0.0822533	0.934445	0.997236
Aim2	763.967	0.164392	0.155052	1.06024	0.289034	0.920188
Aimp1	4256.63	0.0169698	0.0616083	0.275447	0.782973	0.988678
Aimp2	1457.97	0.0406287	0.158373	0.256537	0.797536	0.988678
Aip	3286.96	-0.0300535	0.155876	-0.192804	0.847112	0.988895
Ajap1	7143.12	-0.0529454	0.132935	-0.398282	0.690422	0.98804
Ajuba	139.427	-0.38543	0.177906	-2.16648	0.0302743	0.571483
Ak1	9189.6	-0.0197296	0.111545	-0.176876	0.859606	0.99117
Ak2	1725.11	-0.152149	0.0864603	-1.75976	0.0784489	0.739107
Ak3	7122.83	-0.0191709	0.063066	-0.303982	0.761141	0.988678
Ak4	3049.62	-0.175967	0.127789	-1.37701	0.168508	0.840028
Ak5	13268.7	0.00846043	0.111455	0.0759087	0.939492	0.997617
Ak6	1771.31	-0.0362992	0.119382	-0.304059	0.761083	0.988678
Ak8	201.302	0.113666	0.147731	0.769411	0.441649	0.950558
Akain1	470.219	-0.103841	0.105711	-0.98231	0.325947	0.9304
Akap1	4561.92	-0.0388774	0.0706121	-0.550577	0.581924	0.972385
Akap10	6409.36	0.0937386	0.0711295	1.31786	0.187551	0.860925
Akap11	41315.7	0.152611	0.0765079	1.99471	0.0460743	0.64701
Akap12	3756.35	-0.0606337	0.126104	-0.480823	0.630642	0.980826
Akap13	7463.66	-0.0609218	0.0759097	-0.802556	0.422231	0.948075
Akap17b	4419.9	0.189646	0.118758	1.59692	0.110283	0.777389
Akap5	17875.4	0.151579	0.129902	1.16687	0.243263	0.895519
Akap6	73406.3	0.159687	0.095164	1.67802	0.0933428	0.759517
Akap7	6314.15	0.171414	0.128949	1.32932	0.183744	0.857516
Akap8	8759.91	-0.0403322	0.0868851	-0.464201	0.642503	0.981766
Akap8l	11811.9	-0.0322404	0.0848839	-0.379817	0.704081	0.98804
Akap9	26958.4	0.270968	0.14611	1.85455	0.0636608	0.698737
Akip1	233.498	-0.023602	0.157322	-0.150024	0.880746	0.992501
Akirin1	5128.98	-0.0679806	0.067802	-1.00263	0.316037	0.927513
Akirin2	4378.75	0.0211655	0.0769723	0.274975	0.783335	0.988678
Akna	500.89	-0.291115	0.0709224	-4.10471	4.04831e-05	0.013724
Akr1a1	18414.3	-0.056921	0.0915261	-0.62191	0.534001	0.966753
Akr1b10	952.782	-0.0749098	0.0820563	-0.912908	0.361291	0.938683
Akr1b3	2135.99	0.0113029	0.104364	0.108303	0.913756	0.994841
Akr1c14	156.962	0.0249689	0.173617	0.143816	0.885646	0.992501
Akr1e1	2448.79	-0.0371571	0.0822801	-0.451592	0.651563	0.983688
Akr7a5	1128.92	-0.123817	0.122767	-1.00855	0.31319	0.92631
Akt1	8070.62	0.0109663	0.0766856	0.143003	0.886287	0.992642
Akt1s1	2435.13	-0.226989	0.197835	-1.14736	0.251231	0.899986
Akt2	8940.73	-0.035038	0.1084	-0.323228	0.746523	0.988678
Akt3	57899.3	0.143891	0.120235	1.19675	0.231403	0.890711
Aktip	9882.52	-0.0238093	0.0693153	-0.343492	0.731228	0.988678
AL365322.1	545.754	0.0425825	0.119227	0.357155	0.720976	0.988602
Alad	1527.73	-0.116452	0.12163	-0.957429	0.338351	0.936571
Alas1	5263.29	0.0444657	0.0837894	0.530684	0.595638	0.975269
Alas2	416.05	-0.88071	0.135717	-6.48931	8.6229e-11	3.72624e-07
Alcam	47746.4	0.224306	0.103161	2.17432	0.0296811	0.56921
Aldh16a1	557.717	-0.154216	0.165294	-0.93298	0.35083	0.938374
Aldh18a1	2756.42	-0.0818692	0.0654198	-1.25144	0.210773	0.886587
Aldh1a1	3597.18	-0.176586	0.119831	-1.47363	0.140583	0.819107
Aldh1a2	744.585	-0.656063	0.33292	-1.97063	0.048766	0.653102
Aldh1b1	760.787	0.0380969	0.144677	0.263323	0.792301	0.988678
Aldh1l1	5475.89	-0.00234714	0.06096	-0.0385029	0.969287	0.998318
Aldh1l2	609.559	-0.0422917	0.0912575	-0.463432	0.643055	0.981766
Aldh2	4652.69	-0.160759	0.164861	-0.975119	0.329501	0.931455
Aldh3a2	4296.26	-0.0545517	0.0630919	-0.86464	0.387236	0.944771
Aldh3b1	324.177	0.0481252	0.127483	0.377503	0.7058	0.98804
Aldh5a1	7902.17	0.0522244	0.0528503	0.988157	0.323076	0.929872
Aldh6a1	4692.45	0.0706171	0.0864959	0.816422	0.414259	0.947603
Aldh7a1	6481.33	-0.00501084	0.0433837	-0.1155	0.908048	0.994019
Aldh9a1	1341.32	-0.0309718	0.077447	-0.399909	0.689223	0.98804
Aldoa	109976	0.00113927	0.0918886	0.0123984	0.990108	0.999178
Aldoc	51247.8	-0.0721218	0.0909922	-0.792616	0.428002	0.948075
Alg1	1851.91	0.0126656	0.114599	0.110521	0.911996	0.994782
Alg10b	5809.19	0.0704182	0.0553315	1.27266	0.203139	0.877818
Alg11	4120.25	0.0732527	0.086408	0.847753	0.396575	0.946616
Alg12	1411.99	-0.0124787	0.0899703	-0.138698	0.889689	0.993132
Alg13	1652.4	0.108566	0.123342	0.880208	0.378747	0.942601
Alg14	1116.32	0.0513764	0.0929105	0.552967	0.580286	0.972385
Alg2	8870.6	0.0234564	0.0865093	0.271143	0.786281	0.988678
Alg3	595.737	0.0497073	0.107447	0.462622	0.643635	0.981766
Alg5	1073.29	-0.100768	0.0734408	-1.3721	0.170031	0.842654
Alg6	1844.24	0.261654	0.105415	2.48213	0.0130599	0.40708
Alg8	823.271	-0.146767	0.0587494	-2.49818	0.0124833	0.404582
Alg9	2180.81	-0.00584336	0.0503171	-0.116131	0.907549	0.994019
Alk	4469.94	0.193732	0.18876	1.02634	0.304733	0.92631
Alkbh1	2516.69	-0.0536793	0.0781587	-0.686798	0.49221	0.961401
Alkbh2	370.628	-0.212977	0.123595	-1.72319	0.0848548	0.747908
Alkbh3	1527.94	0.114592	0.0949591	1.20675	0.227529	0.889282
Alkbh4	548.296	-0.115963	0.155214	-0.74712	0.454991	0.952447
Alkbh5	5154.22	-0.117265	0.0895809	-1.30904	0.190521	0.865603
Alkbh6	1809.66	-0.0896378	0.148825	-0.602302	0.546973	0.96693
Alkbh7	827.129	-0.0988986	0.337805	-0.292768	0.769699	0.988678
Alkbh8	6225.15	0.0994394	0.0897973	1.10738	0.268131	0.907403
Alms1	4819.47	0.149696	0.118139	1.26711	0.205114	0.878217
Alox12b	349.235	-0.133372	0.18039	-0.739357	0.45969	0.953356
Alox5ap	240.921	-0.117422	0.145499	-0.807027	0.419651	0.948075
Alox8	273.839	0.178737	0.16091	1.11079	0.266659	0.906701
Aloxe3	300.211	0.103014	0.129991	0.792466	0.428089	0.948075
Alpk1	646.147	-0.0461391	0.133021	-0.346855	0.7287	0.988678
Alpl	544.799	-0.0363796	0.0845649	-0.430197	0.667052	0.984928
Als2	5414.41	-0.0512032	0.051573	-0.992828	0.320794	0.928297
Als2cl	667.673	-0.193669	0.106651	-1.81591	0.069384	0.715541
Alx4	133.252	-0.936648	0.331668	-2.82405	0.00474209	0.253809
Alyref	2380.3	0.0613024	0.0743069	0.824989	0.409378	0.947603
Alyref2	263.586	0.0020842	0.162034	0.0128627	0.989737	0.999178
Amacr	775.302	-0.0520109	0.100626	-0.516872	0.605246	0.97659
Ambra1	12176.8	0.0396516	0.0961424	0.412425	0.680028	0.987871
Amd1	7905.46	-0.0506396	0.0430248	-1.17699	0.2392	0.894431
Amdhd2	1364.39	-0.0108195	0.0884009	-0.122391	0.902589	0.994016
Amer1	1281.37	0.00241297	0.0656764	0.0367403	0.970692	0.998406
Amer2	6058.6	-0.0296896	0.0656126	-0.452498	0.65091	0.983688
Amer3	3173.51	0.0772441	0.0651865	1.18497	0.236028	0.892764
Amfr	12752.4	-0.0296405	0.100892	-0.293784	0.768923	0.988678
Amigo1	6817.5	-0.0531406	0.0945451	-0.562066	0.574071	0.971805
Amigo2	599.497	0.0448285	0.15796	0.283796	0.776567	0.988678
Ammecr1	3376.86	0.247891	0.129136	1.91961	0.0549075	0.673059
Ammecr1l	3019.7	0.0484289	0.0648944	0.746272	0.455503	0.952475
Amn	241.523	-0.339394	0.396424	-0.856138	0.391922	0.945027
Amn1	2671.03	0.0963665	0.0895171	1.07651	0.281697	0.914885
Amot	2788.42	-0.0551581	0.0604535	-0.912405	0.361555	0.938683
Amotl1	3906.97	0.0722984	0.0863671	0.837105	0.402533	0.947603
Amotl2	1735.07	-0.146391	0.0989004	-1.48019	0.138823	0.8173
Ampd2	4420.79	-0.0985604	0.113184	-0.870799	0.383864	0.943427
Ampd3	2406.37	-0.0775946	0.0946526	-0.819784	0.412339	0.947603
Amph	29578.4	0.0688931	0.0717111	0.960704	0.336701	0.936571
Amt	1693.36	-0.15117	0.0906049	-1.66845	0.0952267	0.762049
Amy1	4242.51	0.285831	0.190432	1.50096	0.133365	0.80861
Amz1	1477.72	-0.163011	0.119202	-1.36752	0.171463	0.843824
Amz2	4383.17	-0.0470786	0.107158	-0.439337	0.660417	0.983688
Anapc1	13405.9	0.0206095	0.0440128	0.468261	0.639598	0.981199
Anapc10	3283.13	0.0329342	0.111962	0.294155	0.768639	0.988678
Anapc11	2594.92	-0.117467	0.149726	-0.784548	0.432718	0.948238
Anapc13	1318.47	-0.0448317	0.132936	-0.337242	0.735934	0.988678
Anapc15	1712.62	-0.013632	0.102678	-0.132765	0.894379	0.994016
Anapc16	3416.53	-0.0392669	0.0992945	-0.395458	0.692505	0.98804
Anapc2	3457.99	-0.0304218	0.0959085	-0.317197	0.751094	0.988678
Anapc4	6181.5	0.00641195	0.0322336	0.198921	0.842324	0.988895
Anapc5	15822.7	-0.0121713	0.0553371	-0.219949	0.825911	0.988895
Anapc7	2692.57	-0.0374849	0.141326	-0.265236	0.790827	0.988678
Angel1	572.088	0.0576608	0.0799517	0.721195	0.47079	0.956592
Angel2	5312.87	0.0623506	0.0380426	1.63897	0.10122	0.768528
Angpt1	1704.95	0.229136	0.164564	1.39239	0.163806	0.839147
Angpt2	147.28	-0.576204	0.166052	-3.47002	0.000520415	0.0667986
Angptl2	384.083	-0.42415	0.172683	-2.45624	0.01404	0.417464
Angptl4	173.418	-0.480723	0.158213	-3.03846	0.00237793	0.163976
Angptl6	731.304	-0.0244072	0.133607	-0.182679	0.85505	0.990516
Ank	18755.5	0.0112663	0.0619613	0.181828	0.855718	0.990758
Ank1	7336.61	-0.019347	0.0824008	-0.234792	0.81437	0.988895
Ank2	174686	0.158542	0.106573	1.48763	0.136847	0.814549
Ank3	95536.7	0.140026	0.135541	1.03309	0.301562	0.925515
Ankdd1a	332.653	0.101051	0.178291	0.566776	0.570866	0.971429
Ankef1	319.723	0.413586	0.168067	2.46084	0.0138612	0.414657
Ankfn1	2086.46	0.0144278	0.185425	0.0778093	0.93798	0.997617
Ankfy1	9474.19	0.0163926	0.0540092	0.303514	0.761498	0.988678
Ankhd1	15827.6	0.125365	0.12143	1.03241	0.301881	0.925515
Ankib1	16460.1	0.124008	0.115421	1.07439	0.282647	0.914885
Ankle2	6023.57	0.0372188	0.0797458	0.466718	0.640702	0.981223
Ankmy2	4770.32	0.0693624	0.0645811	1.07404	0.282806	0.914885
Ankra2	3236	0.0868562	0.0652013	1.33212	0.182819	0.856451
Ankrd10	7942.31	-0.0964232	0.0899612	-1.07183	0.283796	0.91589
Ankrd11	28887.5	0.0961638	0.131181	0.733061	0.463521	0.955796
Ankrd12	35368.3	0.530681	0.399162	1.32949	0.183687	0.857516
Ankrd13a	3658.35	-0.13756	0.0742535	-1.85257	0.0639442	0.700499
Ankrd13b	3718.67	-0.149175	0.155222	-0.961043	0.33653	0.93642
Ankrd13c	9083.67	0.0394925	0.0680913	0.579993	0.561919	0.969583
Ankrd13d	4174.9	-0.0370907	0.0865488	-0.428553	0.668249	0.985809
Ankrd16	2637.08	-0.00110669	0.0463041	-0.0239005	0.980932	0.99881
Ankrd17	38709.6	0.124173	0.0990464	1.25369	0.209955	0.8849
Ankrd24	2304.52	-0.0673382	0.10053	-0.669834	0.502964	0.962762
Ankrd26	3681.08	0.0558585	0.103357	0.540444	0.588891	0.974146
Ankrd27	3217.3	-0.0943703	0.0592229	-1.59348	0.111053	0.779992
Ankrd28	17193.9	0.111838	0.0922886	1.21183	0.225577	0.889282
Ankrd29	2240.89	0.0629523	0.107926	0.583289	0.559699	0.969282
Ankrd33b	14572.9	-0.123585	0.0733252	-1.68544	0.0919033	0.757573
Ankrd34a	2945.32	0.0443113	0.0879192	0.504	0.614262	0.977387
Ankrd34b	1824.76	0.0447369	0.107447	0.41636	0.677146	0.987227
Ankrd34c	1903.2	0.27088	0.0950488	2.84991	0.00437322	0.242061
Ankrd35	1003.3	-0.12323	0.0953979	-1.29174	0.196446	0.870972
Ankrd37	458.8	-0.160482	0.13952	-1.15025	0.250042	0.898996
Ankrd39	281.483	-0.126833	0.189796	-0.668261	0.503967	0.963065
Ankrd40	8939.66	0.0148463	0.0546782	0.271522	0.785989	0.988678
Ankrd42	3911.84	0.141376	0.146588	0.964448	0.334821	0.935038
Ankrd44	3376.7	0.0797456	0.121332	0.657249	0.511021	0.96572
Ankrd45	6283.8	0.038001	0.0624939	0.608075	0.543138	0.966859
Ankrd46	10174.3	-0.0163186	0.105311	-0.154956	0.876856	0.992501
Ankrd49	1314.82	0.125665	0.142879	0.879521	0.379119	0.942601
Ankrd50	8003.62	0.073526	0.0637995	1.15245	0.249134	0.898078
Ankrd52	4750.11	-0.0385675	0.0834177	-0.462342	0.643836	0.981766
Ankrd54	907.021	-0.186684	0.105324	-1.77248	0.0763147	0.738749
Ankrd55	648.96	0.240351	0.138476	1.73568	0.0826201	0.742551
Ankrd6	4813.98	-0.109118	0.0988378	-1.10401	0.26959	0.909343
Ankrd63	3381.74	0.0143312	0.15738	0.091061	0.927444	0.996963
Ankrd9	811.586	-0.203704	0.198719	-1.02509	0.305322	0.92631
Anks1	5055.25	-0.222509	0.117151	-1.89934	0.0575202	0.681987
Anks1b	114152	0.248456	0.16375	1.51729	0.129193	0.808007
Anks3	5083.15	-0.061028	0.0529356	-1.15287	0.248963	0.898078
Anks6	1627.45	-0.0643562	0.108314	-0.594162	0.552404	0.967621
Ankub1	286.498	-0.0372044	0.208334	-0.17858	0.858267	0.990967
Ankzf1	2011.44	-0.0302083	0.0785111	-0.384765	0.700411	0.98804
Anln	2966.58	0.0897299	0.149244	0.601231	0.547686	0.96693
Ano1	591.331	0.148269	0.166963	0.888034	0.374522	0.942601
Ano10	2686.05	0.04985	0.0631083	0.789913	0.429579	0.948075
Ano2	1165.05	0.326768	0.322401	1.01354	0.3108	0.92631
Ano3	41701.6	0.304068	0.168014	1.80978	0.0703304	0.719606
Ano4	16881.3	0.186399	0.155471	1.19893	0.230554	0.889993
Ano5	467.706	0.662914	0.204004	3.24952	0.00115601	0.107903
Ano6	5625.54	-0.0325034	0.123591	-0.262991	0.792557	0.988678
Ano8	4437.51	-0.155355	0.140881	-1.10274	0.27014	0.909973
Anp32a	15974.3	0.196619	0.191487	1.0268	0.304514	0.92631
Anp32b	1811.01	0.140852	0.14566	0.96699	0.333549	0.934962
Anp32e	5487.23	0.0327635	0.144618	0.226552	0.820772	0.988895
Anpep	279.943	-0.5818	0.200241	-2.90549	0.00366675	0.215094
Antxr1	3549.91	0.0918318	0.152761	0.601147	0.547742	0.96693
Antxr2	466.489	0.0541533	0.16136	0.335606	0.737168	0.988678
Anxa1	152.624	-0.378809	0.271263	-1.39647	0.162574	0.839016
Anxa11	1383.81	-0.140976	0.140737	-1.0017	0.316488	0.927513
Anxa2	894.072	-0.370202	0.200908	-1.84264	0.065381	0.704493
Anxa3	1184.31	-0.0822496	0.0992257	-0.828914	0.407153	0.947603
Anxa4	339.075	-0.223827	0.155325	-1.44102	0.149579	0.825753
Anxa5	3850.06	-0.0161335	0.116142	-0.138912	0.88952	0.993132
Anxa6	9750.39	-0.0796915	0.0552174	-1.44323	0.148955	0.825258
Anxa7	7511.29	0.00635908	0.0487768	0.130371	0.896273	0.994016
Aoc2	318.735	-0.0577953	0.156449	-0.369419	0.711815	0.98804
Aox1	1006	0.0416394	0.078711	0.529016	0.596794	0.975269
Aox3	448.008	-0.606866	0.191156	-3.17471	0.00149986	0.127922
Aox4	141.412	0.122861	0.148308	0.828417	0.407434	0.947603
Ap1ar	6879.41	0.0556698	0.077392	0.719323	0.471942	0.95694
Ap1b1	15875.5	-0.0183743	0.056116	-0.327434	0.74334	0.988678
Ap1g1	13140.2	0.0543736	0.0418273	1.29996	0.193616	0.868876
Ap1g2	242.616	-0.0316841	0.138316	-0.22907	0.818815	0.988895
Ap1m1	4370.18	0.0105393	0.088609	0.118942	0.905322	0.994019
Ap1m2	131.162	0.0954428	0.137322	0.695031	0.487036	0.960416
Ap1s1	8448.49	-0.0463869	0.202729	-0.228812	0.819015	0.988895
Ap1s2	4323.72	0.181547	0.139908	1.29762	0.194419	0.868876
Ap1s3	354.885	0.191621	0.112406	1.70473	0.0882455	0.753015
Ap2a1	19486.7	0.047532	0.10881	0.436834	0.662232	0.983688
Ap2a2	24100.8	0.0338078	0.0997884	0.338795	0.734764	0.988678
Ap2b1	36112.5	0.0608522	0.0618787	0.983412	0.325405	0.9304
Ap2m1	24710.1	0.00534015	0.157558	0.0338933	0.972962	0.998515
Ap2s1	8604.33	-0.0505263	0.188787	-0.267636	0.788979	0.988678
Ap3b1	10263.1	0.00104558	0.0640567	0.0163227	0.986977	0.999178
Ap3b2	13789.3	0.0200978	0.052481	0.382953	0.701755	0.98804
Ap3d1	18736.3	0.0776998	0.0884997	0.877966	0.379962	0.942601
Ap3m1	5256.7	0.113275	0.0739765	1.53123	0.125712	0.80422
Ap3m2	10928.3	-0.0164286	0.0723011	-0.227225	0.820249	0.988895
Ap3s1	7570.32	0.2082	0.138593	1.50224	0.133035	0.80861
Ap3s2	4303.1	-0.0140178	0.0754017	-0.185908	0.852517	0.989951
Ap4e1	2580.82	-0.0103481	0.0873048	-0.118528	0.905649	0.994019
Ap4m1	1763.18	-0.0398337	0.0852907	-0.467035	0.640475	0.981223
Ap4s1	4187.44	-0.0139235	0.0630361	-0.220882	0.825184	0.988895
Ap5b1	360.044	0.00327616	0.190129	0.0172313	0.986252	0.999178
Ap5m1	4174.98	0.11827	0.075551	1.56543	0.117483	0.787271
Ap5s1	985.781	-0.123058	0.106159	-1.15919	0.246378	0.896688
Ap5z1	1628.09	-0.114636	0.108555	-1.05601	0.290964	0.920188
Apaf1	1867.54	-0.0214394	0.0671222	-0.319408	0.749417	0.988678
Apba1	22903.8	0.0373205	0.0764599	0.488105	0.625475	0.979752
Apba2	31402.7	0.027444	0.0746101	0.367831	0.712999	0.988048
Apba3	1136.64	-0.20657	0.156553	-1.31949	0.187006	0.860371
Apbb1	27925.2	-0.00386688	0.11363	-0.0340303	0.972853	0.998515
Apbb1ip	685.371	0.395319	0.169125	2.33744	0.0194162	0.481284
Apbb2	15544.1	0.0397763	0.121122	0.3284	0.742609	0.988678
Apc	63377.9	0.164965	0.147652	1.11726	0.263883	0.905231
Apc2	12042.6	0.0292115	0.130171	0.224409	0.822439	0.988895
Apcdd1	1615.4	-0.122906	0.0865263	-1.42045	0.155476	0.831173
Apeh	1034.19	-0.115576	0.105549	-1.09501	0.273514	0.911826
Apex1	2594.41	-0.0232785	0.0884898	-0.263065	0.792501	0.988678
Apex2	6510.58	0.142228	0.163146	0.871782	0.383327	0.943168
Aph1a	1521.67	-0.0682089	0.1389	-0.491066	0.62338	0.979664
Aph1b	3175.71	0.0981488	0.0872762	1.12458	0.260768	0.905231
Aph1c	974.771	0.111618	0.0722035	1.54588	0.122133	0.799259
Api5	9166.82	0.0198367	0.0771399	0.257153	0.797061	0.988678
Apip	1566.35	0.0877928	0.0818082	1.07315	0.283202	0.914885
Apitd1	168.398	-0.0999855	0.154075	-0.648941	0.516377	0.966753
Aplf	917.789	0.0289717	0.0751841	0.385343	0.699983	0.98804
Apln	2062.59	-0.169321	0.137661	-1.22998	0.218704	0.888265
Aplp1	45595	0.0245107	0.100029	0.245036	0.806428	0.988678
Aplp2	43467.9	-0.0136108	0.0780973	-0.17428	0.861645	0.991192
Apmap	3914.37	-0.0489892	0.0669454	-0.731778	0.464304	0.956377
Apoa1bp	2551.61	0.0113233	0.117334	0.096505	0.923119	0.996198
Apobec1	237.233	0.00589499	0.104441	0.0564434	0.954989	0.997819
Apobec3	203.476	-0.0296761	0.145841	-0.203482	0.838758	0.988895
Apod	10311.6	-0.205548	0.099838	-2.05882	0.0395116	0.623506
Apoe	84179	-0.156923	0.129413	-1.21257	0.225293	0.889282
Apol8	368.851	0.0757962	0.150649	0.503133	0.614871	0.977387
Apold1	438.25	-0.10492	0.133156	-0.78795	0.430726	0.948075
Apoo	3357.54	0.112269	0.109368	1.02652	0.304645	0.92631
Apool	830.73	0.201082	0.154703	1.29979	0.193672	0.868876
Apopt1	2230.43	-0.0601553	0.0747428	-0.80483	0.420918	0.948075
App	125083	0.0408937	0.0822319	0.497297	0.61898	0.978342
Appbp2	11781.6	0.0857835	0.0592162	1.44865	0.147436	0.824719
Appl1	17017.4	0.143326	0.100422	1.42724	0.15351	0.830447
Appl2	8383.68	-0.089226	0.0832961	-1.07119	0.284084	0.915936
Aprt	1283.95	-0.0671261	0.113208	-0.592945	0.553218	0.96793
Aptx	2647.33	-0.058166	0.0670111	-0.868005	0.385392	0.943929
Aqp11	1019.52	-0.0125743	0.102261	-0.122963	0.902137	0.994016
Aqp4	8931.88	-0.0758445	0.118348	-0.640859	0.521614	0.966753
Aqr	7495.19	0.141425	0.054812	2.58018	0.00987498	0.365769
Ar	4967.61	0.138478	0.0879421	1.57465	0.115337	0.786528
Araf	11578.4	0.0148754	0.0688207	0.216147	0.828873	0.988895
Arap1	1496.09	-0.146415	0.107536	-1.36154	0.173342	0.847355
Arap2	25416.2	0.230047	0.121255	1.89723	0.0577979	0.6823
Arap3	639.151	-0.212801	0.0646404	-3.29208	0.000994509	0.0999443
Arc	6676.97	-0.832205	0.163911	-5.07717	3.83103e-07	0.000551838
Arcn1	11756.2	0.144156	0.10751	1.34087	0.179963	0.855153
Arel1	18429.5	0.0911589	0.0502733	1.81327	0.0697905	0.717839
Arf1	21356.7	0.0144881	0.0961067	0.15075	0.880173	0.992501
Arf2	4042.07	0.0408658	0.102755	0.397701	0.690851	0.98804
Arf3	47340.2	-0.00283275	0.12249	-0.0231264	0.981549	0.998964
Arf4	6764.17	-0.0379443	0.0751449	-0.504948	0.613595	0.977387
Arf5	4951.46	-0.188636	0.175822	-1.07288	0.283325	0.915053
Arf6	1980.77	-0.117378	0.115339	-1.01768	0.308831	0.92631
Arfgap1	8305.73	-0.0417221	0.0630514	-0.661716	0.508153	0.96546
Arfgap2	4152.92	-0.0398472	0.111668	-0.356837	0.721214	0.988602
Arfgap3	1858.05	0.048095	0.0820384	0.586251	0.557707	0.969282
Arfgef1	19191.8	0.150545	0.0907759	1.65842	0.0972323	0.764829
Arfgef2	10921.5	0.0212605	0.0560978	0.378991	0.704695	0.98804
Arfgef3	34844.2	0.252141	0.104783	2.40632	0.0161141	0.443532
Arfip1	187.801	-0.0981114	0.156924	-0.625218	0.531828	0.966753
Arfip2	5866.37	-0.0425154	0.0949287	-0.447866	0.65425	0.983688
Arfrp1	1929.08	-0.105724	0.135934	-0.77776	0.436711	0.94928
Arg2	384.532	0.026656	0.18401	0.144862	0.88482	0.992501
Arglu1	16585.3	0.152854	0.132832	1.15073	0.249842	0.898711
Arhgap1	6830.74	0.0554512	0.0589909	0.939996	0.347219	0.936571
Arhgap10	10159.8	0.162108	0.135298	1.19816	0.230854	0.890004
Arhgap11a	219.712	0.0373529	0.185623	0.20123	0.840519	0.988895
Arhgap12	7039.83	0.0653309	0.0849125	0.769392	0.441661	0.950558
Arhgap15	5142.86	0.284925	0.175763	1.62108	0.105001	0.774746
Arhgap17	3133.04	-0.046994	0.146533	-0.320707	0.748433	0.988678
Arhgap18	3542.29	0.169271	0.150109	1.12765	0.259466	0.904203
Arhgap19	515.175	-0.0392349	0.0842486	-0.465704	0.641427	0.981639
Arhgap20	16897.9	0.261123	0.109585	2.38283	0.0171803	0.460585
Arhgap21	22645.6	0.106723	0.0820077	1.30138	0.193128	0.868876
Arhgap22	1619.04	-0.150337	0.171574	-0.876224	0.380908	0.9427
Arhgap23	9086.66	-0.0811201	0.0667889	-1.21458	0.224528	0.889282
Arhgap24	1666.4	0.0456215	0.12775	0.357116	0.721005	0.988602
Arhgap25	1591.77	-0.164498	0.164729	-0.998599	0.317989	0.927513
Arhgap26	35590.8	0.0774764	0.122859	0.630612	0.528294	0.966753
Arhgap27	1093.41	0.0231179	0.106081	0.217926	0.827487	0.988895
Arhgap28	160.8	-0.518163	0.193804	-2.67365	0.00750316	0.31911
Arhgap29	4718.02	0.0207978	0.108226	0.19217	0.847609	0.988895
Arhgap30	342.698	0.00327454	0.132831	0.024652	0.980333	0.99881
Arhgap31	4142.31	-0.029742	0.10986	-0.270725	0.786602	0.988678
Arhgap32	57841.5	0.150286	0.0616962	2.43591	0.0148546	0.430816
Arhgap33	4574.82	0.0972263	0.116988	0.831079	0.405929	0.947603
Arhgap35	27751.9	0.0501325	0.0649055	0.772392	0.439882	0.950558
Arhgap39	9314.12	-0.0352175	0.0916274	-0.384355	0.700715	0.98804
Arhgap4	344.425	-0.0683088	0.107857	-0.63333	0.526518	0.966753
Arhgap42	6042.2	0.348129	0.133679	2.60422	0.00920826	0.355235
Arhgap44	19237.3	0.112745	0.0657317	1.71523	0.0863035	0.750317
Arhgap45	428.485	-0.100678	0.133834	-0.752257	0.451896	0.951822
Arhgap5	30166.9	0.195396	0.15053	1.29806	0.194268	0.868876
Arhgap6	4413.17	0.336628	0.159676	2.1082	0.035014	0.596076
Arhgdia	11353	-0.0189145	0.127435	-0.148425	0.882008	0.992501
Arhgdib	693.604	-0.0662252	0.125344	-0.528348	0.597258	0.975269
Arhgdig	2542.58	-0.0916621	0.134967	-0.679143	0.497048	0.962433
Arhgef1	1874.91	-0.148227	0.122685	-1.20819	0.226973	0.889282
Arhgef10	5571.52	-0.00887195	0.101253	-0.0876219	0.930177	0.996963
Arhgef10l	4956.58	-0.0482482	0.100042	-0.482281	0.629606	0.980826
Arhgef11	12825.5	-0.00394722	0.0893963	-0.0441542	0.964781	0.997979
Arhgef12	34736.5	0.0402636	0.06355	0.633574	0.526359	0.966753
Arhgef15	1295.38	0.0746782	0.0787465	0.948336	0.342959	0.936571
Arhgef17	18961.7	-0.047929	0.0728915	-0.657539	0.510834	0.96572
Arhgef18	5957.65	-0.00430472	0.0622741	-0.0691254	0.94489	0.997617
Arhgef19	547.828	-0.107397	0.157778	-0.680685	0.496071	0.962081
Arhgef2	13626.8	-0.0189072	0.057574	-0.328399	0.74261	0.988678
Arhgef25	9034.78	-0.136181	0.0637072	-2.13761	0.032548	0.578913
Arhgef26	3044.77	-0.0336131	0.0688541	-0.488179	0.625423	0.979752
Arhgef28	6269.94	0.10355	0.0802539	1.29028	0.196953	0.871332
Arhgef3	9347.8	-0.00871745	0.0616896	-0.141311	0.887624	0.993024
Arhgef33	434.943	0.454481	0.160412	2.83321	0.00460831	0.249967
Arhgef37	1559.4	-0.269624	0.62262	-0.433048	0.66498	0.984222
Arhgef4	18360.9	-0.0492188	0.0844864	-0.582565	0.560186	0.969282
Arhgef40	1812.11	-0.0639337	0.106021	-0.603029	0.546489	0.96693
Arhgef5	300.706	-0.309537	0.171861	-1.80108	0.0716896	0.725199
Arhgef6	1563.48	0.105379	0.112035	0.940591	0.346915	0.936571
Arhgef7	14061.2	-0.0182294	0.0835891	-0.218084	0.827364	0.988895
Arhgef9	45091.7	0.168881	0.090148	1.87338	0.061016	0.688587
Arid1a	10371.9	0.0299807	0.0938116	0.319584	0.749284	0.988678
Arid1b	23902.6	0.0632189	0.13404	0.471642	0.637182	0.981199
Arid2	8183.04	0.10613	0.0844056	1.25738	0.208617	0.883236
Arid3a	929.988	-0.116759	0.0962337	-1.21328	0.225022	0.889282
Arid3b	1020.11	-0.125105	0.143114	-0.874163	0.38203	0.942782
Arid4a	7618.32	0.0505666	0.161124	0.313836	0.753646	0.988678
Arid4b	13051.3	0.120971	0.131831	0.917617	0.358819	0.938374
Arid5a	643.239	-0.103617	0.0984507	-1.05248	0.29258	0.920188
Arid5b	8478.47	0.0478392	0.12915	0.370416	0.711073	0.98804
Arih1	17546.8	0.0755843	0.0840191	0.899608	0.368329	0.941446
Arih2	6174.8	-0.0482703	0.0389544	-1.23915	0.21529	0.888125
Arl1	10822.6	-0.0629011	0.0710324	-0.885526	0.375873	0.942601
Arl10	687.865	-0.22083	0.153056	-1.44281	0.149074	0.825258
Arl13b	2960.47	0.0891414	0.112689	0.791037	0.428923	0.948075
Arl14ep	3961.53	0.0143296	0.0692114	0.207041	0.835977	0.988895
Arl15	18219	0.0288354	0.14337	0.201125	0.840601	0.988895
Arl16	1261.92	-0.00641457	0.119091	-0.0538629	0.957044	0.997949
Arl2	2890.68	0.0210819	0.125206	0.168378	0.866286	0.991424
Arl2bp	7322.3	-0.00573522	0.12254	-0.0468029	0.96267	0.997979
Arl3	5961.75	0.00782851	0.11091	0.0705843	0.943729	0.997617
Arl4a	4943.33	0.101436	0.104524	0.970462	0.331816	0.934941
Arl4c	3513.11	0.0454898	0.0737873	0.616499	0.537565	0.966859
Arl4d	1225.11	-0.566891	0.190834	-2.97059	0.00297226	0.18705
Arl5a	9884.1	0.0303851	0.0638517	0.47587	0.634167	0.981199
Arl5b	3032.86	-0.0797112	0.0655286	-1.21643	0.223819	0.889282
Arl6	3017.91	0.151777	0.117092	1.29622	0.194899	0.868876
Arl6ip1	16436.1	0.0137443	0.133163	0.103214	0.917793	0.995588
Arl6ip4	2149.29	-0.0110909	0.142489	-0.0778368	0.937958	0.997617
Arl6ip5	6357.49	-0.0158675	0.104418	-0.151962	0.879217	0.992501
Arl6ip6	1493.72	0.0326177	0.111282	0.293109	0.769439	0.988678
Arl8a	7475.12	0.108989	0.0775951	1.40458	0.160145	0.834283
Arl8b	18564.7	0.092932	0.106014	0.876598	0.380705	0.942601
Armc1	6365.07	0.0617395	0.0808896	0.763256	0.44531	0.950558
Armc10	1812.83	-0.0550925	0.0674383	-0.816931	0.413968	0.947603
Armc2	1449.4	0.0282916	0.115339	0.245292	0.80623	0.988678
Armc4	182.746	0.588465	0.225086	2.6144	0.00893853	0.348999
Armc5	949.018	0.00102452	0.149553	0.00685051	0.994534	0.999602
Armc6	2243.87	-0.0615767	0.156056	-0.394581	0.693152	0.98804
Armc7	639.355	-0.110945	0.0747134	-1.48494	0.137561	0.815056
Armc8	12134.1	0.088047	0.0665017	1.32398	0.185509	0.860159
Armc9	5788.37	0.000326434	0.0811147	0.00402434	0.996789	0.999602
Armcx1	5679.52	-0.0162789	0.0848337	-0.191892	0.847827	0.988895
Armcx2	6590.3	0.118052	0.0660829	1.78642	0.0740314	0.731221
Armcx3	5229.66	0.0253964	0.0796703	0.318768	0.749902	0.988678
Armcx4	6288.91	0.00882716	0.100599	0.087746	0.930079	0.996963
Armcx6	244.65	-0.0881262	0.152107	-0.579372	0.562338	0.969583
Armt1	1862.91	-0.0621837	0.0683772	-0.909421	0.363128	0.939875
Arnt	6243.58	0.0160522	0.102808	0.156138	0.875925	0.992501
Arnt2	30336.3	0.107981	0.0615732	1.75371	0.0794809	0.739624
Arntl	6612.65	0.116122	0.093923	1.23635	0.216329	0.888265
Arntl2	1874.9	0.1606	0.114417	1.40364	0.160425	0.834904
Arpc1a	10548.3	0.0193338	0.127677	0.151427	0.879639	0.992501
Arpc1b	1163.85	-0.0795967	0.149392	-0.532804	0.594169	0.974689
Arpc2	10565.6	0.0348197	0.0590833	0.589333	0.555638	0.96793
Arpc3	10368	0.0344003	0.18221	0.188794	0.850254	0.989655
Arpc4	6719.34	-0.0411931	0.153488	-0.268379	0.788407	0.988678
Arpc5	6273.84	-0.0632696	0.114937	-0.55047	0.581997	0.972385
Arpc5l	6309.81	-0.139695	0.124882	-1.11861	0.263307	0.905231
Arpin	1593	-0.0365113	0.0893773	-0.408508	0.682901	0.98804
Arpp19	34558	0.207949	0.119781	1.73608	0.0825493	0.742551
Arpp21	104151	0.200842	0.128411	1.56405	0.117806	0.787641
Arrb1	37153.7	-0.0958507	0.065082	-1.47277	0.140813	0.819531
Arrb2	2548.11	-0.0848802	0.0884626	-0.959504	0.337305	0.936571
Arrdc1	609.58	0.0467488	0.0962132	0.485887	0.627047	0.98082
Arrdc2	683.827	-0.0833052	0.0949119	-0.877711	0.380101	0.942601
Arrdc3	5887.22	-0.0384175	0.0856134	-0.448732	0.653625	0.983688
Arrdc4	691.508	-0.0709921	0.0822617	-0.863003	0.388136	0.944771
Arsa	1953.09	-0.0106728	0.125406	-0.0851059	0.932177	0.997236
arsb	8398.24	0.137522	0.0876865	1.56834	0.116803	0.786528
Arsg	2112.79	0.0794222	0.075487	1.05213	0.29274	0.920188
Arsj	520.36	-0.0201703	0.133443	-0.151153	0.879855	0.992501
Arsk	1098.8	0.0559147	0.0936757	0.596897	0.550576	0.967164
Art3	300.17	0.0088495	0.125496	0.0705161	0.943783	0.997617
Arv1	948.792	-0.00741835	0.0749205	-0.0990163	0.921125	0.995703
Arvcf	2978.64	-0.136783	0.109563	-1.24845	0.211867	0.887249
Arx	965.002	-0.0813821	0.132828	-0.612688	0.540082	0.966859
Arxes1	815.607	-0.155196	0.152112	-1.02028	0.307596	0.92631
Arxes2	2558.52	-0.0368859	0.11396	-0.323674	0.746185	0.988678
As3mt	987.447	-0.0585583	0.0889044	-0.658665	0.510111	0.96572
Asah1	7189.11	0.071189	0.0634317	1.12229	0.261738	0.905231
Asah2	1977.04	0.28613	0.117425	2.43671	0.0148216	0.430816
Asap1	30204	0.110173	0.119897	0.918892	0.358152	0.938374
Asap2	4109.24	-0.0576348	0.101929	-0.565442	0.571773	0.971429
Asap3	427.907	-0.266835	0.134678	-1.98129	0.0475592	0.651572
Asb1	4041.97	-0.0756194	0.083273	-0.90809	0.36383	0.939875
Asb11	529.042	0.418199	0.126208	3.31357	0.000921116	0.0955308
Asb13	3885.36	0.105342	0.0864715	1.21823	0.223135	0.889282
Asb18	287.238	0.274003	0.101099	2.71023	0.00672358	0.301458
Asb2	375.843	-0.212815	0.128785	-1.65248	0.0984363	0.768036
Asb3	6722.52	0.215282	0.124654	1.72704	0.0841601	0.747908
Asb5	615.431	0.414123	0.154578	2.67905	0.0073831	0.315889
Asb6	2098.23	-0.0705925	0.138231	-0.510683	0.609573	0.977387
Asb7	3213.69	0.0414788	0.0953985	0.434795	0.663711	0.983827
Asb8	3032.18	-0.0384769	0.0945511	-0.406943	0.68405	0.98804
Ascc1	1455.16	0.0644262	0.0631322	1.0205	0.307493	0.92631
Ascc2	2479.14	-0.0278397	0.0936103	-0.2974	0.766161	0.988678
Ascc3	13512.1	0.170239	0.111802	1.52269	0.127836	0.807728
Ascl1	256.843	0.272638	0.257321	1.05952	0.289361	0.920188
Asf1a	1181.25	0.0350757	0.0863769	0.406077	0.684686	0.98804
Ash1l	28534	0.0707778	0.0875003	0.808886	0.418581	0.948075
Ash2l	3879.06	0.00116398	0.0374073	0.0311165	0.975177	0.998515
Asic1	5872.15	-0.038315	0.0737153	-0.51977	0.603224	0.975695
Asic2	80619.3	0.133515	0.209965	0.635892	0.524847	0.966753
Asic4	1988.12	-0.0360325	0.205084	-0.175696	0.860533	0.991192
Asl	909.698	0.0301964	0.106024	0.284808	0.775791	0.988678
Asna1	4819.42	0.0327242	0.105296	0.310784	0.755965	0.988678
Asns	10172.5	0.03505	0.0885411	0.395861	0.692207	0.98804
Aspa	2468.38	0.144595	0.14203	1.01806	0.30865	0.92631
Aspg	381.771	-0.542852	0.249298	-2.17752	0.0294418	0.567555
Asph	18613.1	0.169649	0.063616	2.66676	0.00765854	0.324462
Asphd1	1535.59	-0.0724539	0.18843	-0.384512	0.700599	0.98804
Asphd2	7248.66	-0.0869205	0.127569	-0.681359	0.495644	0.961938
Aspn	198.792	0.235711	0.261109	0.902732	0.366668	0.940868
Aspscr1	2089.57	-0.123966	0.137037	-0.90462	0.365667	0.940577
Asrgl1	13742.5	-0.0392044	0.0489465	-0.800964	0.423152	0.948075
Ass1	1888.03	0.094716	0.110035	0.860784	0.389357	0.944771
Aste1	1081	0.0599671	0.108089	0.554794	0.579036	0.97212
Astn1	45166.2	0.103856	0.0950242	1.09294	0.27442	0.912357
Astn2	28238.4	0.24627	0.157797	1.56067	0.118601	0.789969
Asxl1	7754.15	0.0443893	0.0644244	0.689015	0.490814	0.96102
Asxl2	7962.88	0.0955307	0.0926871	1.03068	0.302691	0.92631
Asxl3	5087.49	0.311444	0.128657	2.42073	0.0154894	0.438732
Atad1	12084.3	0.0819828	0.0719444	1.13953	0.254482	0.901586
Atad2	2083.03	0.442355	0.118509	3.73266	0.000189465	0.0373763
Atad2b	7647.42	0.106454	0.128999	0.825233	0.409239	0.947603
Atad3a	3348.11	-0.115467	0.0883972	-1.30623	0.191475	0.865603
Atad5	1068.52	0.143076	0.137303	1.04205	0.297391	0.923669
Atat1	2043.85	0.0548896	0.107143	0.512302	0.60844	0.977387
Atcay	18400.4	-0.0416634	0.077002	-0.54107	0.58846	0.974146
Atf1	1718.51	0.0697838	0.09144	0.763165	0.445365	0.950558
Atf2	16920	0.156	0.0848389	1.83877	0.0659485	0.706423
Atf4	8812.55	-0.21992	0.151823	-1.44853	0.147468	0.824719
Atf5	706.086	-0.176281	0.322526	-0.546563	0.584679	0.973138
Atf6	17088.1	0.117536	0.0919756	1.2779	0.201283	0.875979
Atf6b	2182.39	-0.0915985	0.151767	-0.603549	0.546144	0.96693
Atf7ip	12223.4	0.0395811	0.0949518	0.416855	0.676784	0.987162
Atg10	4464.59	0.292514	0.137802	2.12272	0.0337774	0.590915
Atg101	2015.18	-0.0870945	0.17556	-0.496097	0.619826	0.978781
Atg12	6276.15	-0.0289269	0.0766694	-0.377294	0.705955	0.98804
Atg13	4011.26	-0.0131672	0.0766151	-0.171862	0.863546	0.991423
Atg14	2258.36	-0.0739265	0.0638008	-1.15871	0.246575	0.896914
Atg16l1	7776.62	-0.00572858	0.0620868	-0.0922673	0.926486	0.99676
Atg16l2	2223.15	0.0376473	0.075176	0.500789	0.616519	0.977683
Atg2a	3885.19	0.0101675	0.0888656	0.114414	0.908909	0.994019
Atg2b	10393.4	0.00797874	0.043357	0.184024	0.853994	0.989951
Atg3	5198.29	0.150963	0.121261	1.24495	0.213151	0.887249
Atg4a	1254.67	0.268364	0.125532	2.13781	0.0325321	0.578913
Atg4b	4832.44	-0.0522905	0.0699127	-0.74794	0.454496	0.952365
Atg4c	6777.4	0.0915827	0.0908283	1.00831	0.313308	0.92631
Atg4d	1733.63	-0.198988	0.141953	-1.40178	0.16098	0.835444
Atg5	3141.67	-0.0446386	0.0770569	-0.579294	0.562391	0.969583
Atg7	2928.92	0.0252471	0.0770811	0.327539	0.74326	0.988678
Atg9a	6094.03	0.0683568	0.0854959	0.799533	0.423981	0.948075
Atg9b	295.853	0.0631295	0.166246	0.379736	0.704142	0.98804
Athl1	407.587	-0.235064	0.134154	-1.7522	0.07974	0.739624
Atic	2395.87	-0.0423802	0.0740427	-0.572374	0.567068	0.971429
Atl1	12180.7	0.0882983	0.0675091	1.30795	0.190892	0.865603
Atl2	6420.36	0.00936952	0.050792	0.184469	0.853646	0.989951
Atl3	4380.92	0.0301574	0.0765695	0.393856	0.693687	0.98804
Atm	5178.6	0.034504	0.0841599	0.409981	0.68182	0.98804
Atmin	7350.84	0.0600942	0.071054	0.845754	0.39769	0.94728
Atox1	2290.2	-0.0473123	0.309326	-0.152953	0.878435	0.992501
Atp10a	3210.56	-0.20855	0.13672	-1.52538	0.127165	0.807728
Atp10b	233.123	0.223646	0.169526	1.31925	0.187086	0.860371
Atp11a	8912.85	0.0274286	0.107616	0.254875	0.79882	0.988678
Atp11b	10504	0.287845	0.133752	2.15209	0.0313906	0.573975
Atp11c	5269.58	0.186012	0.152886	1.21667	0.22373	0.889282
Atp13a1	4271.65	0.0151587	0.0588794	0.257453	0.796829	0.988678
Atp13a2	9838.43	-0.00707904	0.146813	-0.0482183	0.961542	0.997979
Atp13a3	10479.1	0.0152159	0.0760515	0.200074	0.841423	0.988895
Atp13a4	943.613	0.128461	0.125655	1.02233	0.306623	0.92631
Atp13a5	2754.87	0.0396024	0.139512	0.283864	0.776515	0.988678
Atp1a1	69211	-0.0250628	0.0986999	-0.253929	0.799551	0.988678
Atp1a2	87238.9	-0.131603	0.0860217	-1.52988	0.126047	0.804565
Atp1a3	87963.6	0.0678109	0.170587	0.397516	0.690987	0.98804
Atp1b1	82403.8	0.0683855	0.106152	0.644222	0.519431	0.966753
Atp1b2	7195.71	-0.00276172	0.0751973	-0.0367263	0.970703	0.998406
Atp1b3	10538.5	-0.0672227	0.067545	-0.995229	0.319625	0.927513
Atp2a2	81664.9	0.0662376	0.0824921	0.802957	0.422	0.948075
Atp2a3	568.728	-0.16863	0.10177	-1.65697	0.0975246	0.765783
Atp2b1	123415	0.150689	0.140677	1.07117	0.284093	0.915936
Atp2b2	110558	0.0319108	0.0885998	0.360168	0.718721	0.988602
Atp2b3	11934.8	0.0183446	0.0702591	0.2611	0.794016	0.988678
Atp2b4	25349.8	0.0913951	0.068524	1.33377	0.18228	0.855591
Atp2c1	26477.1	0.115893	0.061568	1.88236	0.059787	0.685884
Atp5a1	68125.5	-0.0194559	0.0820924	-0.237	0.812657	0.988796
Atp5b	82155.6	-0.0855297	0.106507	-0.803045	0.421949	0.948075
Atp5c1	20109.8	0.00206043	0.0831006	0.0247944	0.980219	0.99881
Atp5d	11170	-0.176083	0.19024	-0.925586	0.354661	0.938374
Atp5e	5559.68	-0.07302	0.401939	-0.18167	0.855842	0.990767
Atp5f1	20197.6	0.0214256	0.0686668	0.312022	0.755024	0.988678
Atp5g1	9673.79	-0.0190765	0.126954	-0.150264	0.880557	0.992501
Atp5g2	3092.99	-0.0289589	0.186664	-0.155139	0.876712	0.992501
Atp5g3	9405.71	-0.0552229	0.329454	-0.167619	0.866883	0.991553
Atp5h	17194.1	-0.0353508	0.101401	-0.348626	0.72737	0.988678
Atp5j	7958.75	-0.0769723	0.135813	-0.566752	0.570882	0.971429
Atp5j2	11300.2	-0.109797	0.168508	-0.651584	0.51467	0.966753
Atp5k	10454.6	0.0178013	0.444742	0.040026	0.968072	0.997979
Atp5l	7277.53	-0.0689796	0.245412	-0.281077	0.778652	0.988678
Atp5o	13160.5	-0.00882468	0.132661	-0.0665203	0.946964	0.997743
Atp5s	1150.57	0.133907	0.127564	1.04973	0.293842	0.922273
Atp5sl	2418.87	-0.0529941	0.0756541	-0.700478	0.483629	0.96033
Atp6ap1	22521.6	0.032527	0.136612	0.238098	0.811805	0.988678
Atp6ap1l	1383.48	-0.000100907	0.0661707	-0.00152494	0.998783	0.999786
Atp6ap2	21150.3	0.00311338	0.0778703	0.0399816	0.968108	0.997979
Atp6v0a1	39044.4	0.0402109	0.0358496	1.12166	0.262009	0.905231
Atp6v0a2	5688.98	-0.0750235	0.0688226	-1.0901	0.275669	0.912603
Atp6v0a4	146.908	-0.112401	0.186564	-0.602477	0.546857	0.96693
Atp6v0b	14032.8	-0.0753019	0.123923	-0.60765	0.54342	0.966859
Atp6v0d1	13931.9	-0.000807936	0.0732737	-0.0110263	0.991202	0.999178
Atp6v0e	2631.55	-0.105266	0.0888724	-1.18446	0.236229	0.892764
Atp6v0e2	20985	-0.0298599	0.0951452	-0.313835	0.753646	0.988678
Atp6v1a	44322.7	0.0547401	0.0810783	0.675151	0.49958	0.962433
Atp6v1b2	41749.8	-0.00777045	0.0952951	-0.081541	0.935012	0.997236
Atp6v1c1	21944.7	0.00328035	0.081489	0.0402551	0.96789	0.997979
Atp6v1d	20940.3	0.0435028	0.108824	0.399753	0.689338	0.98804
Atp6v1e1	28438.1	-0.0136589	0.112147	-0.121795	0.903062	0.994016
Atp6v1f	4961.25	0.0247066	0.177643	0.13908	0.889387	0.993132
Atp6v1g1	6149.71	-0.0866083	0.124671	-0.694696	0.487246	0.960416
Atp6v1g2	17627.7	0.133035	0.166989	0.796668	0.425644	0.948075
Atp6v1h	18972.7	0.0317098	0.0753776	0.420679	0.673989	0.986296
Atp7a	1648.31	-0.0214716	0.0923205	-0.232576	0.816091	0.988895
Atp7b	288.145	0.108816	0.0856274	1.2708	0.203799	0.877818
Atp8a1	53880	0.106854	0.0632226	1.69012	0.0910042	0.753852
Atp8a2	16390.1	0.101695	0.109912	0.925235	0.354844	0.938374
Atp8b1	1107.38	0.244995	0.147396	1.66216	0.0964817	0.763083
Atp8b2	8096.03	-0.0750502	0.0738508	-1.01624	0.309515	0.92631
Atp9a	31412.5	0.0360501	0.127952	0.281746	0.778138	0.988678
Atp9b	20387.2	0.130178	0.0775644	1.67832	0.0932846	0.759517
Atpaf1	5299.99	0.0339569	0.0451227	0.752546	0.451723	0.951822
Atpaf2	2090.45	-0.0378816	0.0615459	-0.615502	0.538223	0.966859
Atpif1	14161.9	0.110432	0.152828	0.72259	0.469932	0.956592
Atr	4715.5	0.197947	0.117259	1.68812	0.0913879	0.755101
Atraid	3785.11	-0.0544911	0.0943764	-0.577381	0.563682	0.970113
Atrn	29728.7	0.118294	0.0636099	1.85968	0.0629307	0.696981
Atrnl1	43790.8	0.0774678	0.102613	0.75495	0.450279	0.951822
Atrx	39541.2	0.205467	0.159678	1.28676	0.198177	0.874017
Atxn1	38050.3	0.119153	0.130165	0.915394	0.359985	0.938374
Atxn10	19989	0.0751763	0.0538267	1.39664	0.162523	0.839016
Atxn1l	4349.07	0.0222818	0.0586353	0.380007	0.703941	0.98804
Atxn2	12457	0.0517386	0.0794744	0.65101	0.51504	0.966753
Atxn2l	5120.82	-0.0528334	0.0778733	-0.678453	0.497484	0.962433
Atxn3	4993.46	-0.0677688	0.0866956	-0.781686	0.434399	0.948679
Atxn7	6642.06	-0.0173296	0.107012	-0.16194	0.871353	0.992501
Atxn7l1	7891.13	-0.0101296	0.161032	-0.062904	0.949843	0.997813
Atxn7l2	1241.21	-0.088441	0.0934689	-0.946208	0.344043	0.936571
Atxn7l3	13076	-0.109451	0.129626	-0.844362	0.398467	0.947336
Atxn7l3b	13471.7	-0.056262	0.122057	-0.46095	0.644835	0.981903
Auh	5789.61	-0.0296118	0.0703847	-0.420714	0.673964	0.986296
Aup1	3170.81	-0.0703255	0.115664	-0.608016	0.543177	0.966859
Aurkaip1	3613.69	-0.092073	0.123	-0.74856	0.454122	0.952365
Auts2	79395.1	-0.122837	0.217902	-0.563728	0.57294	0.971562
Aven	1642.39	-0.0947342	0.120148	-0.78848	0.430416	0.948075
Avl9	9824.91	0.119988	0.0711604	1.68616	0.0917641	0.757244
Avpi1	1644.76	-0.0291769	0.14127	-0.206532	0.836375	0.988895
AW011738	191.698	-0.15783	0.182281	-0.865863	0.386565	0.944662
Axin1	3286.13	-0.0395713	0.0650385	-0.60843	0.542903	0.966859
Axin2	2436.77	-0.153838	0.0821373	-1.87294	0.0610773	0.688587
Axl	3023.52	-0.0688233	0.0770169	-0.893613	0.371529	0.94194
Azi2	9188.22	0.0522838	0.0759692	0.688224	0.491312	0.961264
Azin1	17156.4	-0.0122852	0.0624126	-0.196838	0.843954	0.988895
Azin2	2428.26	-0.067649	0.110363	-0.612967	0.539898	0.966859
B2m	7942.81	0.657625	0.414696	1.5858	0.112784	0.786063
B3galnt1	4208.31	0.025149	0.0851615	0.295309	0.767758	0.988678
B3galnt2	2745.51	-0.0296419	0.0841094	-0.352421	0.724523	0.988678
B3galt1	52870.3	0.15967	0.157849	1.01154	0.311758	0.92631
B3galt2	7782.89	0.324787	0.149449	2.17323	0.0297629	0.569935
B3galt4	256.56	-0.0696986	0.145745	-0.478224	0.632491	0.980826
B3galt5	4340.13	0.0907442	0.0886073	1.02412	0.30578	0.92631
B3galt6	1054.15	0.0409783	0.169135	0.242282	0.808562	0.988678
B3gat1	12965.8	-0.0119556	0.0499332	-0.239433	0.81077	0.988678
B3gat2	996.035	0.181042	0.08966	2.01921	0.0434653	0.632152
B3gat3	7515.67	-0.0801334	0.132455	-0.604986	0.545188	0.96693
B3glct	2921.87	-0.0314402	0.0995433	-0.315845	0.75212	0.988678
B3gnt9	248.777	0.0333498	0.145661	0.228955	0.818904	0.988895
B3gntl1	2007.35	0.0733	0.0923491	0.793727	0.427354	0.948075
B430305J03Rik	227.457	0.000515324	0.226262	0.00227755	0.998183	0.999602
B4galnt1	7330.31	-0.0237708	0.0793576	-0.29954	0.764528	0.988678
B4galnt3	172.868	-0.282449	0.140631	-2.00844	0.0445969	0.639551
B4galnt4	5500.69	-0.0326233	0.0831716	-0.392241	0.69488	0.98804
B4galt1	841.434	-0.145658	0.0826022	-1.76336	0.0778394	0.739107
B4galt2	5094.18	-0.055911	0.110044	-0.508078	0.611399	0.977387
B4galt3	2296.83	-0.0963154	0.100622	-0.957202	0.338466	0.936571
B4galt4	1886.81	-0.0189483	0.0684072	-0.276992	0.781786	0.988678
B4galt5	5404.87	-0.0635033	0.083352	-0.761869	0.446138	0.950803
B4galt6	11090.8	0.0789891	0.0581741	1.35781	0.174525	0.847696
B4galt7	1521.89	-0.100009	0.10018	-0.998302	0.318133	0.927513
B4gat1	6974.41	-0.0420036	0.140511	-0.298935	0.76499	0.988678
B9d1	1287.67	0.0178201	0.0784359	0.227193	0.820274	0.988895
B9d2	696.216	-0.11261	0.213478	-0.527501	0.597846	0.975269
Baalc	13725.4	0.0561973	0.126996	0.44251	0.65812	0.983688
Babam1	4087.94	-0.0105312	0.123124	-0.0855336	0.931837	0.997236
Bace1	9393.96	-0.0180332	0.0470205	-0.383517	0.701337	0.98804
Bace2	525.334	0.604993	0.156309	3.87049	0.000108616	0.0256019
Bach1	1713.46	-0.20157	0.0673316	-2.99369	0.00275624	0.180992
Bach2	6898.14	0.0314217	0.165463	0.189902	0.849386	0.989334
Bad	1951.05	-0.0688903	0.133675	-0.515357	0.606304	0.976657
Bag1	5643.63	0.0789123	0.0805362	0.979836	0.327167	0.9304
Bag2	671.625	-0.030891	0.0987728	-0.312748	0.754472	0.988678
Bag3	366.677	-0.170758	0.10193	-1.67525	0.0938854	0.759517
Bag4	8084.42	0.115326	0.08348	1.38148	0.167133	0.840028
Bag5	4217.86	-0.0878385	0.0860586	-1.02068	0.307405	0.92631
Bag6	11517.9	0.0339042	0.105084	0.322638	0.74697	0.988678
Bahcc1	1960.7	0.0107565	0.139693	0.0770013	0.938622	0.997617
Bahd1	3143.01	-0.124719	0.108982	-1.1444	0.252459	0.900905
Baiap2	31488.8	-0.0407393	0.0935373	-0.435541	0.66317	0.983827
Baiap3	1968.98	0.539631	0.42445	1.27136	0.203599	0.877818
Bak1	973.794	0.0408542	0.0874852	0.466984	0.640511	0.981223
Bambi	272.572	0.0687025	0.153566	0.447382	0.654599	0.983688
Banf1	1249.1	-0.120389	0.174813	-0.688673	0.491029	0.961264
Bank1	455.541	0.322136	0.190528	1.69076	0.090883	0.753852
Bap1	10110.8	-0.013033	0.0805473	-0.161805	0.871459	0.992501
Bard1	142.59	0.252588	0.160231	1.57639	0.114935	0.786528
Barx2	399.275	0.112919	0.253604	0.445257	0.656134	0.983688
Basp1	31047.2	-0.0582672	0.0873909	-0.666742	0.504937	0.963628
Bax	1380.71	-0.141033	0.121871	-1.15723	0.247178	0.897977
Baz1a	851.207	-0.0918073	0.136508	-0.672541	0.501239	0.962762
Baz1b	16609.8	-0.005382	0.0725511	-0.0741822	0.940865	0.997617
Baz2a	5722.54	-0.0863709	0.0983197	-0.87847	0.379688	0.942601
Baz2b	16457.8	0.071262	0.122712	0.580723	0.561427	0.969282
Bbc3	277.447	-0.309368	0.254633	-1.21496	0.224383	0.889282
Bbip1	4240	0.0399386	0.0775084	0.515281	0.606356	0.976657
Bbof1	2152.68	0.10596	0.12463	0.850199	0.395214	0.945368
Bbs1	4277.02	-0.0207249	0.0701581	-0.295402	0.767687	0.988678
Bbs10	566.871	0.144804	0.0790198	1.8325	0.0668767	0.710818
Bbs2	3214.29	0.132279	0.089572	1.47679	0.139732	0.819107
Bbs4	5168.34	-0.00353558	0.0594931	-0.0594283	0.952611	0.997819
Bbs5	2290.97	0.06176	0.0727436	0.849009	0.395876	0.946191
Bbs7	3233.44	0.0859863	0.113626	0.75675	0.4492	0.951822
Bbs9	7117.13	0.182142	0.152809	1.19196	0.233278	0.892188
Bbx	10010.7	-0.002206	0.0858565	-0.025694	0.979501	0.99881
BC003965	2161.51	-0.0764772	0.127719	-0.598792	0.549312	0.96693
BC031181	5874.58	-0.0239931	0.112883	-0.212549	0.831679	0.988895
Bcam	1097.39	-0.253434	0.145504	-1.74177	0.0815492	0.741123
Bcan	12215.9	-0.0656267	0.129796	-0.505614	0.613127	0.977387
Bcap29	2894.43	0.125508	0.0911896	1.37634	0.168717	0.840028
Bcap31	3815.05	-0.0910903	0.0834825	-1.09113	0.275216	0.912603
Bcar1	4201.14	-0.0767696	0.0839577	-0.914384	0.360515	0.938683
Bcar3	2016.6	-0.00162249	0.0539889	-0.0300524	0.976025	0.998515
Bcas1	9361.51	0.0401722	0.105313	0.381455	0.702866	0.98804
Bcas2	4518.23	0.195346	0.149077	1.31037	0.190071	0.865603
Bcas3	16080.8	0.0444586	0.124287	0.357709	0.720561	0.988602
Bcat1	7836.39	-0.0221171	0.0703065	-0.314581	0.75308	0.988678
Bcat2	937.779	-0.0799675	0.10357	-0.772107	0.440051	0.950558
Bccip	2911.8	-0.0980099	0.104054	-0.941909	0.346239	0.936571
Bcdin3d	399.522	0.175305	0.11302	1.5511	0.120878	0.795594
Bche	841.565	-0.137777	0.186178	-0.740031	0.459281	0.952787
Bckdha	3039.78	-0.00882359	0.114885	-0.0768036	0.93878	0.997617
Bckdhb	5773.34	0.0870777	0.0931986	0.934324	0.350137	0.938374
Bckdk	2872.06	-0.0372418	0.0628973	-0.592104	0.553781	0.96793
Bcl10	1009.07	-0.0546625	0.0980922	-0.557256	0.577352	0.97212
Bcl11a	11850.4	-0.0167121	0.136987	-0.121998	0.902901	0.994016
Bcl11b	14034.8	0.00224589	0.126673	0.0177298	0.985854	0.999178
Bcl2	5327.77	-0.126591	0.0966479	-1.30982	0.190258	0.865603
Bcl2l1	8252.71	-0.0696365	0.0642932	-1.08311	0.278761	0.914113
Bcl2l11	416.39	-0.293557	0.14003	-2.0964	0.036047	0.59931
Bcl2l12	153.272	-0.212879	0.139524	-1.52575	0.127073	0.807728
Bcl2l13	4601.87	0.012982	0.0439216	0.295571	0.767558	0.988678
Bcl6	2290.49	-0.0565125	0.0868499	-0.650692	0.515245	0.966753
Bcl7a	5986.99	-0.0459815	0.080396	-0.571937	0.567364	0.971429
Bcl7b	3141.9	-0.090509	0.0921996	-0.981664	0.326265	0.9304
Bcl7c	875.86	-0.238387	0.0833955	-2.85851	0.00425637	0.238873
Bcl9	3201.87	-0.0424229	0.102974	-0.411978	0.680356	0.987871
Bcl9l	2416.21	-0.120425	0.143456	-0.839458	0.401212	0.947603
Bclaf1	25504.5	0.142489	0.14033	1.01538	0.309923	0.92631
Bco2	334.163	-0.0582683	0.0851541	-0.684269	0.493805	0.961401
Bcor	4368.7	-0.190496	0.0643524	-2.96021	0.00307432	0.189875
Bcorl1	2402.98	-0.0108333	0.104311	-0.103856	0.917284	0.995585
Bcr	16575.9	0.0536975	0.118766	0.452129	0.651176	0.983688
Bcs1l	1323.1	-0.0591726	0.092324	-0.640923	0.521573	0.966753
Bdh1	4174.35	-0.00796027	0.102407	-0.077732	0.938041	0.997617
Bdnf	3680.56	0.117983	0.0986937	1.19544	0.231915	0.892013
Bdp1	10704.6	0.127028	0.126422	1.00479	0.314997	0.926863
Bean1	1036.19	0.0777794	0.0968147	0.803384	0.421753	0.948075
Becn1	8908.18	-0.0955922	0.0649159	-1.47256	0.140871	0.819531
Begain	5992.94	-0.101164	0.118673	-0.852464	0.393957	0.945027
Bend3	764.83	0.158901	0.0891445	1.78252	0.074665	0.733857
Bend4	1425.2	0.0550252	0.0789912	0.696599	0.486054	0.960416
Bend6	12554.7	0.125826	0.0917627	1.37121	0.170309	0.843025
Bend7	608.899	0.218393	0.168121	1.29902	0.193938	0.868876
Bet1	1727.29	0.069177	0.0967782	0.714799	0.474733	0.958777
Bex1	3626.15	-0.0915474	0.182141	-0.502618	0.615233	0.977436
Bex2	18785.8	-0.0975504	0.124127	-0.785892	0.431931	0.948113
Bex4	1031.93	-0.06726	0.142594	-0.47169	0.637148	0.981199
Bfar	3804.13	-0.0551634	0.0495549	-1.11318	0.265632	0.906573
Bfsp2	368.873	0.123423	0.183399	0.672978	0.500961	0.962762
Bgn	625.533	-0.458885	0.149384	-3.07185	0.00212737	0.151691
Bhlhb9	6977.94	0.0240651	0.0544878	0.441661	0.658734	0.983688
Bhlhe22	1978.35	-0.0228251	0.142112	-0.160613	0.872398	0.992501
Bhlhe40	6156.76	-0.386024	0.0864383	-4.46588	7.9739e-06	0.00397591
Bhlhe41	3039.26	0.0278275	0.184473	0.150848	0.880095	0.992501
Bicc1	1954.95	-0.301904	0.134718	-2.24101	0.0250253	0.534318
Bicd1	20447.6	0.181861	0.135615	1.34101	0.179917	0.855153
Bicd2	7472.35	-0.010136	0.061637	-0.164447	0.869379	0.992119
Bicdl1	9241.13	-0.00306057	0.113153	-0.0270481	0.978421	0.99881
Bicral	5172.29	0.06256	0.0718342	0.870895	0.383812	0.943427
Bid	801.175	0.014083	0.0868386	0.162175	0.871168	0.992501
Bin1	18734.1	-0.0957233	0.0607866	-1.57474	0.115315	0.786528
Bin2	322.129	0.0507578	0.107528	0.472041	0.636898	0.981199
Bin3	2173.49	0.0382809	0.0971878	0.393886	0.693665	0.98804
Birc2	4946.06	-0.00826789	0.0542629	-0.152367	0.878897	0.992501
Birc3	309.049	-0.13994	0.115382	-1.21284	0.22519	0.889282
Birc6	37740.8	0.14863	0.0709081	2.09609	0.0360744	0.59931
Bivm	2420.76	0.0526879	0.072564	0.726088	0.467785	0.95655
Blcap	5902.77	-0.0281862	0.112652	-0.250205	0.802429	0.988678
Blm	918.389	0.174897	0.136079	1.28526	0.1987	0.874017
Blmh	5792.75	0.0586573	0.0607594	0.965403	0.334343	0.934962
Blnk	1054.02	-0.160965	0.116794	-1.3782	0.168143	0.840028
Bloc1s1	1090.43	-0.0437389	0.226151	-0.193406	0.846641	0.988895
Bloc1s2	1661.51	-0.169043	0.136978	-1.23409	0.217168	0.888265
Bloc1s3	597.715	-0.166008	0.198416	-0.836669	0.402778	0.947603
Bloc1s4	478.067	-0.10603	0.147244	-0.720098	0.471464	0.956592
Bloc1s5	1344.36	0.230685	0.0891741	2.58691	0.00968414	0.363899
Bloc1s6	2214.73	0.0541739	0.0859124	0.630572	0.52832	0.966753
Blvra	1279.79	-0.0576311	0.111557	-0.516606	0.605431	0.97659
Blvrb	672.13	0.0338559	0.190457	0.177761	0.85891	0.99117
Blzf1	2238	0.131644	0.117749	1.11801	0.263564	0.905231
Bmf	359.579	-0.176651	0.13735	-1.28613	0.198396	0.874017
Bmi1	4415.94	0.0617459	0.0962801	0.641315	0.521318	0.966753
Bmp1	3354.65	-0.120224	0.114184	-1.0529	0.292386	0.920188
Bmp2	292.696	-0.179231	0.119545	-1.49928	0.133801	0.80861
Bmp2k	4103.07	-0.0354127	0.0887748	-0.398905	0.689963	0.98804
Bmp3	2812.53	0.273251	0.121009	2.25811	0.0239385	0.522756
Bmp4	236.92	-0.464032	0.167886	-2.76397	0.00571026	0.274958
Bmp5	274.493	-0.265288	0.251338	-1.0555	0.291196	0.920188
Bmp6	1261.16	-0.653993	0.180397	-3.62529	0.000288635	0.0473653
Bmp7	861.104	-0.406839	0.111747	-3.64071	0.000271888	0.0469968
Bmper	2499.37	0.249418	0.1244	2.00497	0.0449659	0.642025
Bmpr1a	9163.05	0.127774	0.111111	1.14997	0.250157	0.898996
Bmpr1b	8241.67	0.258294	0.12975	1.9907	0.0465137	0.6506
Bmpr2	32194.3	0.290512	0.146548	1.98237	0.047438	0.651572
Bms1	4634.99	0.024968	0.137562	0.181503	0.855973	0.990769
Bmx	154.117	-0.0651574	0.124639	-0.522771	0.601134	0.975695
Bmyc	1101.3	-0.108829	0.349842	-0.311081	0.755739	0.988678
Bnc2	1247.45	-0.616125	0.231735	-2.65875	0.00784309	0.327993
Bnip1	1479.08	0.0374992	0.0660785	0.567494	0.570378	0.971429
Bnip2	3658.63	0.0935326	0.130818	0.714985	0.474618	0.958777
Bnip3	8362.57	0.0160224	0.0870867	0.183982	0.854027	0.989951
Bnip3l	10661.5	0.0687685	0.0941424	0.730473	0.465101	0.95655
Boc	3043.78	-0.195841	0.104489	-1.87427	0.0608931	0.688587
Bod1	3983.54	-0.0133934	0.143051	-0.0936264	0.925406	0.996566
Bod1l	16355.1	0.195843	0.140642	1.39249	0.163774	0.839147
Bok	2553.67	-0.171798	0.208016	-0.825889	0.408867	0.947603
Bola1	744.937	-0.037195	0.240851	-0.154431	0.87727	0.992501
Bola2	2320.96	-0.0753736	0.194364	-0.387796	0.698167	0.98804
Bola3	1254.1	-0.0853167	0.0917376	-0.930008	0.352367	0.938374
Bop1	4218.31	-0.0387765	0.10916	-0.355228	0.722419	0.988602
Bora	517.052	0.0659611	0.144705	0.455832	0.648511	0.982286
Borcs5	2918.53	-0.0350923	0.0769479	-0.456053	0.648352	0.982286
Borcs6	1287.19	-0.304064	0.167198	-1.81858	0.0689751	0.713642
Borcs7	1248.82	0.0914163	0.0924243	0.989094	0.322617	0.929872
Bpgm	4061.98	-0.0432791	0.061786	-0.700467	0.483636	0.96033
Bphl	2471.84	0.0129508	0.0559815	0.231341	0.81705	0.988895
Bpnt1	6216.86	-0.0101943	0.0662165	-0.153954	0.877646	0.992501
Bptf	17178.6	0.0264185	0.0875695	0.301686	0.762891	0.988678
Braf	28222.2	0.186339	0.102817	1.81234	0.0699344	0.717839
Brap	6787.21	0.00427904	0.0534019	0.080129	0.936135	0.997236
Brat1	1805.7	-0.0409319	0.118631	-0.345036	0.730067	0.988678
Brca1	236.188	-0.043638	0.120013	-0.363611	0.716148	0.98837
Brca2	1211.37	0.374256	0.164101	2.28065	0.0225691	0.511302
Brcc3	4078.16	0.254124	0.142047	1.78901	0.0736125	0.730989
Brd1	7615.25	-0.0449462	0.0587233	-0.76539	0.444039	0.950558
Brd2	11481.1	-0.0752609	0.0784929	-0.958825	0.337647	0.936571
Brd3	4381.23	-0.0300217	0.0568297	-0.528274	0.597309	0.975269
Brd4	9272.15	0.0480323	0.0957649	0.501565	0.615974	0.977561
Brd7	4713.99	0.0563136	0.142578	0.394965	0.692868	0.98804
Brd8	7357.87	0.0852997	0.0833786	1.02304	0.306289	0.92631
Brd9	7474.42	0.0530221	0.108351	0.489353	0.624591	0.979698
Brdt	2437.05	0.100534	0.120106	0.837045	0.402567	0.947603
Bre	8834.8	0.240213	0.136348	1.76176	0.0781099	0.739107
Brf1	3713.16	-0.0404005	0.0770408	-0.524404	0.599998	0.975695
Brf2	1019.01	-0.0732115	0.117292	-0.624182	0.532508	0.966753
Bri3	1557.08	-0.0396164	0.110039	-0.360022	0.71883	0.988602
Bri3bp	12321.9	-0.0471402	0.0674088	-0.699318	0.484353	0.960416
Brinp1	56591.9	0.29209	0.107292	2.72239	0.00648122	0.300081
Brinp2	15879.7	-0.115239	0.0846976	-1.36059	0.173642	0.847543
Brinp3	30821.2	0.430536	0.205159	2.09855	0.0358566	0.598737
Brix1	1508.82	0.0792835	0.0958748	0.826949	0.408266	0.947603
Brk1	9902.57	-0.00713325	0.0861107	-0.0828381	0.93398	0.997236
Brms1	1612.03	-0.0348058	0.12207	-0.285131	0.775544	0.988678
Brms1l	5834.67	0.0163318	0.0526909	0.309956	0.756594	0.988678
Brox	6977.53	0.0308069	0.0436635	0.705552	0.480467	0.959601
Brpf1	3151.25	-0.0658232	0.0650194	-1.01236	0.311365	0.92631
Brpf3	2895.49	0.00911638	0.0635314	0.143494	0.8859	0.992501
Brsk1	17527.5	-0.0775363	0.0887114	-0.874029	0.382103	0.942782
Brsk2	16300.9	0.00451842	0.0655821	0.0688971	0.945072	0.997617
Brwd1	24425.7	0.036386	0.0650535	0.559325	0.57594	0.97212
Brwd3	3945.97	0.197213	0.146469	1.34645	0.178156	0.852931
Bscl2	5733.65	-0.000528855	0.103058	-0.00513161	0.995906	0.999602
Bsdc1	4309.56	-0.0111933	0.0654671	-0.170976	0.864243	0.991423
Bsg	28827.2	-0.0787481	0.15238	-0.516787	0.605305	0.97659
Bsn	48629	0.0763255	0.0790995	0.964929	0.33458	0.935038
Btaf1	17757.9	0.0107364	0.105714	0.10156	0.919106	0.995703
Btbd1	12623.9	0.11101	0.0891436	1.24529	0.213025	0.887249
Btbd10	14642.7	0.116483	0.070432	1.65383	0.0981616	0.767531
Btbd11	3231.85	-0.0621122	0.0889377	-0.698379	0.484941	0.960416
Btbd17	1000.42	-0.08404	0.242191	-0.346999	0.728592	0.988678
Btbd19	465.991	-0.0706411	0.140864	-0.501486	0.616029	0.977561
Btbd2	4362.71	0.023519	0.114203	0.205939	0.836838	0.988895
Btbd3	16192.5	0.0576353	0.0681287	0.845976	0.397566	0.94728
Btbd6	3041.4	-0.0583866	0.0877281	-0.66554	0.505705	0.963784
Btbd7	7258.03	0.0149796	0.0868111	0.172554	0.863002	0.991423
Btbd8	11845.9	0.211159	0.133285	1.58427	0.113133	0.786528
Btbd9	19445.7	-0.121796	0.10747	-1.1333	0.257087	0.90181
Btd	764.003	-0.11992	0.0865655	-1.38531	0.165957	0.839351
Btf3	5871.7	0.049452	0.129898	0.380697	0.703428	0.98804
Btf3l4	4799.31	0.156877	0.0915095	1.71433	0.0864682	0.750317
Btg1	1777.87	-0.0887343	0.132587	-0.669254	0.503333	0.962762
Btg2	901.884	-0.103541	0.132771	-0.779845	0.435482	0.948838
Btg3	944.023	0.315469	0.12154	2.59559	0.00944286	0.360705
Btla	179.744	0.134682	0.171555	0.785068	0.432414	0.948212
Btrc	14307.7	-0.00530262	0.0591353	-0.0896693	0.92855	0.996963
Bub1b	224.812	-0.379041	0.234885	-1.61373	0.106587	0.775584
Bub3	5199.43	0.0274932	0.104256	0.263708	0.792005	0.988678
Bud13	854.579	-0.101105	0.131228	-0.770453	0.441031	0.950558
Bud31	2837.83	-0.00897427	0.0597225	-0.150266	0.880555	0.992501
Bves	162.867	0.115166	0.150426	0.765596	0.443917	0.950558
Bysl	2185.95	-0.0468635	0.0801388	-0.58478	0.558696	0.969282
Bzrap1	20629.4	-0.122382	0.142301	-0.86002	0.389778	0.944771
Bzw1	16941.1	0.0459034	0.0814034	0.563899	0.572823	0.97149
Bzw2	5034.35	0.0621992	0.0836345	0.743703	0.457056	0.952787
C1d	3525.24	0.0244889	0.119506	0.204918	0.837636	0.988895
C1galt1	3411.76	0.173596	0.0826422	2.10057	0.0356789	0.598737
C1galt1c1	1845.01	0.0550905	0.0850889	0.647446	0.517344	0.966753
C1qa	2619.86	0.00389937	0.127258	0.0306414	0.975556	0.998515
C1qb	2546.02	-0.0556459	0.121921	-0.45641	0.648095	0.982286
C1qbp	2024.32	0.0675918	0.100697	0.671242	0.502067	0.962762
C1qc	2564.49	-0.0339024	0.161002	-0.210571	0.833222	0.988895
C1ql1	392.198	0.00508344	0.175117	0.0290289	0.976842	0.998515
C1ql3	7301.29	0.106407	0.0936007	1.13682	0.255613	0.901586
C1qtnf1	183.814	-0.212696	0.203141	-1.04704	0.295083	0.923335
C1qtnf4	6568.39	-0.248674	0.337796	-0.736165	0.46163	0.955202
C1qtnf7	274.013	-0.379923	0.221449	-1.71562	0.0862311	0.750317
C1ra	251.346	-0.0227898	0.245876	-0.0926884	0.926151	0.996566
C2cd2	1624.64	0.0798069	0.089065	0.896052	0.370225	0.941809
C2cd2l	10759.7	0.0534626	0.0959306	0.557305	0.577319	0.97212
C2cd3	4614.58	-4.75969e-05	0.0795822	-0.000598084	0.999523	0.999859
C2cd4c	843.704	-0.0930128	0.154502	-0.602017	0.547163	0.96693
C2cd5	14022.2	0.0724301	0.097692	0.741413	0.458443	0.952787
C3ar1	195.663	0.200856	0.103966	1.93195	0.0533654	0.670259
C4b	1368.3	-0.25674	0.107099	-2.39721	0.0165204	0.449937
C7	190.23	1.24286	0.253389	4.90496	9.34465e-07	0.000807627
CAAA01180111.1	3894.97	0.166959	0.106188	1.5723	0.11588	0.786528
Caap1	3122.31	0.0705467	0.143669	0.491035	0.623402	0.979664
Cab39	22019.7	0.0560651	0.059316	0.945194	0.34456	0.936571
Cab39l	3962.42	0.0869469	0.0872421	0.996616	0.318951	0.927513
Cabin1	15151.7	-0.04871	0.110917	-0.439157	0.660548	0.983688
Cables1	4342.16	-0.0976974	0.113591	-0.860081	0.389744	0.944771
Cables2	2473.91	0.0477331	0.063092	0.756563	0.449312	0.951822
Cabp1	11115.5	-0.194015	0.0991364	-1.95705	0.0503415	0.656771
Cabp7	1206.74	0.1312	0.135443	0.968673	0.332708	0.934962
Cacfd1	2093.21	-0.0428938	0.13156	-0.32604	0.744394	0.988678
Cachd1	2065.19	-0.0595985	0.118341	-0.503618	0.61453	0.977387
Cacna1a	23808.3	0.0355717	0.113865	0.312404	0.754734	0.988678
Cacna1b	23840	0.0483113	0.114543	0.421774	0.67319	0.98624
Cacna1c	45734.2	-0.0700476	0.212482	-0.329664	0.741654	0.988678
Cacna1d	20549.8	-0.0257679	0.168312	-0.153096	0.878322	0.992501
Cacna1e	75111.2	0.124408	0.106909	1.16368	0.244555	0.895926
Cacna1g	6899.43	-0.142448	0.118158	-1.20557	0.227984	0.889282
Cacna1h	6751.28	-0.0273188	0.160877	-0.169812	0.865158	0.991423
Cacna1i	12825.6	-0.0263508	0.111838	-0.235617	0.81373	0.988895
Cacna2d1	67623.2	0.251708	0.119516	2.10606	0.0351987	0.596492
Cacna2d2	4229.15	0.190319	0.150345	1.26588	0.205557	0.879194
Cacna2d3	70890.2	0.152936	0.1835	0.833435	0.404599	0.947603
Cacna2d4	384.32	-0.0930073	0.138881	-0.669693	0.503054	0.962762
Cacnb1	8976.07	-0.0268731	0.0842877	-0.318826	0.749859	0.988678
Cacnb2	41867.5	0.14152	0.176656	0.801107	0.42307	0.948075
Cacnb3	13855.4	-0.0538889	0.0770824	-0.699108	0.484485	0.960416
Cacnb4	50917.3	0.117273	0.125523	0.934282	0.350159	0.938374
Cacng2	7699.33	0.019991	0.144003	0.138823	0.88959	0.993132
Cacng3	10036.1	0.108349	0.140073	0.773516	0.439217	0.950558
Cacng4	3217.12	0.181804	0.247734	0.733867	0.46303	0.955751
Cacng5	1700.03	-0.0925053	0.223946	-0.41307	0.679555	0.987871
Cacng7	4684.25	-0.0620929	0.129403	-0.479843	0.631339	0.980826
Cacng8	4508.31	-0.0102951	0.0857826	-0.120014	0.904472	0.994019
Cactin	1751.17	-0.0690895	0.14847	-0.465344	0.641685	0.981722
Cacul1	8753.36	0.0642823	0.0657084	0.978296	0.327928	0.9304
Cacybp	6410.57	0.155657	0.115873	1.34334	0.179163	0.854327
Cad	1616.82	0.00922834	0.112995	0.0816707	0.934909	0.997236
Cadm1	46467.9	0.0379355	0.117604	0.322569	0.747022	0.988678
Cadm2	284293	0.24227	0.203066	1.19306	0.232844	0.892188
Cadm3	29809.3	0.0169697	0.0918746	0.184705	0.85346	0.989951
Cadm4	12230.5	-0.085327	0.206845	-0.412517	0.679961	0.987871
Cadps	84318.8	0.12852	0.126303	1.01755	0.308891	0.92631
Cadps2	25296	0.360999	0.145984	2.47286	0.0134036	0.409821
Cage1	859.142	0.108731	0.116849	0.930522	0.352101	0.938374
Calb1	10104.2	0.0950279	0.0942473	1.00828	0.313319	0.92631
Calb2	1394.88	-0.237712	0.400026	-0.594241	0.552351	0.967621
Calcoco1	4626.03	0.0131433	0.101311	0.129733	0.896778	0.994016
Calcrl	1129.68	0.0159043	0.152938	0.103992	0.917176	0.995585
Cald1	3097.48	0.0291625	0.162388	0.179585	0.857478	0.990967
Calhm2	1004.67	-0.119178	0.0964552	-1.23558	0.216616	0.888265
Calm1	283591	-0.0380589	0.118757	-0.320477	0.748607	0.988678
Calm2	129369	0.063221	0.112223	0.56335	0.573196	0.971805
Calm3	116130	-0.0508325	0.156169	-0.325497	0.744805	0.988678
Caln1	30190	0.185419	0.104834	1.76869	0.076945	0.739107
Calr	34806.3	0.0629201	0.15033	0.418546	0.675548	0.986904
Calu	7905.84	0.0389195	0.0600465	0.648156	0.516884	0.966753
Caly	9844.74	0.0189002	0.130323	0.145026	0.88469	0.992501
Camk1	5955.45	-0.130358	0.130575	-0.998338	0.318116	0.927513
Camk1d	28830.4	-0.0807838	0.128679	-0.627793	0.530139	0.966753
Camk1g	3289.24	0.0010049	0.0883708	0.0113714	0.990927	0.999178
Camk2a	83135.3	-0.0621564	0.0965937	-0.643482	0.519911	0.966753
Camk2b	61217	-0.0111794	0.0766686	-0.145814	0.884068	0.992501
Camk2d	16522.7	0.0848544	0.0890154	0.953255	0.340461	0.936571
Camk2g	21749.3	-0.0099055	0.0679021	-0.145879	0.884017	0.992501
Camk2n1	84837.1	-0.186691	0.158877	-1.17507	0.239969	0.894987
Camk2n2	2138.5	-0.150456	0.180749	-0.832403	0.405182	0.947603
Camk4	53491.1	0.183363	0.131083	1.39883	0.161864	0.838825
Camkk1	9659.83	-0.225833	0.12347	-1.82905	0.0673926	0.711348
Camkk2	22444.7	-0.00233851	0.0850351	-0.0275005	0.978061	0.99881
Camkmt	6022.7	-0.00759997	0.143523	-0.0529528	0.957769	0.997979
Camkv	32686.6	-0.0481578	0.114598	-0.420234	0.674314	0.98637
Caml	3224.93	-0.0428017	0.0821385	-0.521092	0.602303	0.975695
Camsap1	13965.7	0.0063957	0.0433577	0.14751	0.88273	0.992501
Camsap2	30995.7	0.0994108	0.111215	0.893864	0.371395	0.94194
Camsap3	1765.01	-0.0687053	0.0769738	-0.89258	0.372082	0.94194
Camta1	32316.6	0.119211	0.132831	0.89746	0.369473	0.941562
Camta2	11334.5	-0.0510736	0.0471708	-1.08274	0.278924	0.91428
Cand1	19892.6	0.0697951	0.0600487	1.16231	0.24511	0.895926
Cand2	326.195	0.146833	0.134747	1.08969	0.275851	0.912603
Cant1	3584.11	-0.0191826	0.0972931	-0.197163	0.8437	0.988895
Canx	42185.8	0.0524309	0.06906	0.759208	0.447728	0.951802
Cap1	20387.6	0.0796767	0.0888389	0.896868	0.369789	0.941652
Cap2	27903.3	0.110414	0.104431	1.0573	0.290377	0.920188
Capg	146.995	-0.0768639	0.173538	-0.442922	0.657822	0.983688
Capn1	1454.91	-0.0278578	0.0792628	-0.351461	0.725243	0.988678
Capn10	2026.22	-0.127107	0.0921941	-1.37869	0.16799	0.840028
Capn15	4267.26	-0.0646387	0.0908944	-0.71114	0.476997	0.959134
Capn2	5704.29	-0.0219044	0.0435532	-0.502935	0.61501	0.977387
Capn3	494.121	0.0537464	0.0919515	0.584508	0.558878	0.969282
Capn5	3243.78	-0.0296769	0.0677602	-0.437969	0.661409	0.983688
Capn6	342.433	0.430679	0.215357	1.99984	0.0455177	0.64332
Capn7	5550.84	0.0122686	0.0691617	0.17739	0.859202	0.99117
Capns1	5977.06	0.00610942	0.149396	0.0408941	0.96738	0.997979
Caprin1	26546.8	0.039702	0.0666143	0.595998	0.551176	0.967314
Caprin2	1104.81	0.19647	0.130208	1.50889	0.131326	0.80861
Capza1	4217.34	0.0802251	0.0482668	1.66212	0.096489	0.763083
Capza2	20121	0.0796992	0.0819808	0.972169	0.330966	0.933809
Capzb	11205.6	0.0741132	0.108718	0.681701	0.495428	0.961918
Car10	46622.5	0.224161	0.158268	1.41634	0.156675	0.831737
Car11	10173.3	-0.103049	0.142158	-0.724893	0.468518	0.956592
Car12	2225.9	0.187902	0.146895	1.27916	0.200842	0.875974
Car13	180.332	-0.379505	0.290472	-1.30651	0.191379	0.865603
Car14	500.701	-0.133573	0.121596	-1.09849	0.271989	0.911388
Car2	11620.5	0.0274718	0.0840302	0.326928	0.743723	0.988678
Car4	1533.06	-0.133029	0.106025	-1.2547	0.209588	0.884437
Car5b	352.535	-0.0141173	0.139479	-0.101214	0.91938	0.995703
Car7	2298.8	-0.0737239	0.0699878	-1.05338	0.292166	0.920188
Car8	1028.71	0.0230822	0.0970931	0.237733	0.812088	0.988678
Card10	185.18	-0.180629	0.190554	-0.947915	0.343173	0.936571
Card19	413.195	-0.0214719	0.11006	-0.195093	0.84532	0.988895
Card9	159.465	-0.270082	0.18645	-1.44855	0.147462	0.824719
Carf	4021.56	0.150564	0.0704066	2.13849	0.0324769	0.578913
Carhsp1	3365.97	0.0124122	0.127417	0.0974143	0.922397	0.996082
Carkd	3828.42	-0.0571355	0.080688	-0.708103	0.478881	0.959134
Carm1	4830.17	-0.0248861	0.0774153	-0.321463	0.74786	0.988678
Carmil3	2405	-0.0251954	0.128267	-0.19643	0.844274	0.988895
Carnmt1	2003.22	0.036509	0.0920577	0.396588	0.691671	0.98804
Carns1	596.462	-0.0570466	0.117099	-0.487165	0.626141	0.979995
Cars	4824.43	-0.096467	0.0535509	-1.80141	0.0716388	0.725199
Cars2	1401.09	-0.0207726	0.0849027	-0.244664	0.806717	0.988678
Cartpt	912.716	0.116378	0.372627	0.312318	0.754799	0.988678
Casc1	164.577	0.159001	0.171842	0.925271	0.354825	0.938374
Casc3	4386.81	-0.0903155	0.0684293	-1.31984	0.186889	0.860371
Casc4	15147	0.188709	0.101206	1.86461	0.0622357	0.695433
Casd1	7478.54	0.107582	0.0549134	1.95912	0.0500983	0.656697
Cask	22910.9	0.179638	0.0952408	1.88615	0.0592749	0.683652
Caskin1	8359.4	-0.0431208	0.100538	-0.4289	0.667996	0.985648
Caskin2	1536.73	0.00267207	0.177101	0.0150878	0.987962	0.999178
Casp12	156.742	0.293486	0.237339	1.23657	0.216247	0.888265
Casp2	1564.48	-0.050843	0.0637066	-0.798081	0.424823	0.948075
Casp3	785.312	-0.00142144	0.0949713	-0.014967	0.988058	0.999178
Casp6	168.496	-0.0946344	0.109438	-0.864727	0.387188	0.944771
Casp7	386.052	0.199116	0.0919457	2.16558	0.0303435	0.571483
Casp8	389.874	-0.156025	0.148299	-1.0521	0.292753	0.920188
Casp8ap2	3381.88	0.152516	0.147478	1.03416	0.301062	0.925313
Casp9	1320.84	-0.00078918	0.109151	-0.00723018	0.994231	0.999474
Casq2	310.671	0.182962	0.102303	1.78843	0.0737064	0.730989
Cast	1697.73	0.045776	0.107619	0.425352	0.67058	0.98624
Casz1	285.571	-0.0382275	0.190897	-0.200252	0.841284	0.988895
Cat	4229.53	0.284198	0.181597	1.565	0.117583	0.78737
Catip	216.019	0.178955	0.211697	0.845337	0.397923	0.947336
Catsper2	640.683	0.0292951	0.12026	0.243598	0.807542	0.988678
Catsperz	295.446	-0.210779	0.169938	-1.24033	0.214855	0.88791
Cav1	1016.78	-0.111045	0.0680558	-1.63167	0.102749	0.769386
Cav2	2708.78	0.403999	0.282363	1.43078	0.152495	0.830145
Cbarp	15174.2	-0.104882	0.145123	-0.72271	0.469858	0.956592
Cbfa2t2	8901.55	0.0407672	0.0590437	0.690458	0.489907	0.9605
Cbfa2t3	1356.67	-0.378797	0.106133	-3.56909	0.000358229	0.0521807
Cbfb	2505.34	0.0236864	0.103016	0.22993	0.818146	0.988895
Cbl	7739.41	-2.19617e-05	0.0817132	-0.000268766	0.999786	0.999917
Cblb	6018.26	0.150983	0.125463	1.2034	0.22882	0.889282
Cbll1	2335.18	0.126757	0.140428	0.902649	0.366712	0.940868
Cbln1	309.233	-0.126428	0.216463	-0.584063	0.559178	0.969282
Cbln2	3556.99	-0.0260531	0.146586	-0.177733	0.858932	0.99117
Cbln4	956.705	-0.184904	0.153092	-1.2078	0.227125	0.889282
Cbr1	2769.83	-0.0512394	0.133868	-0.382759	0.701898	0.98804
Cbr3	691.378	-0.0973038	0.221443	-0.439408	0.660366	0.983688
Cbr4	1480.33	0.174019	0.063144	2.75591	0.00585286	0.276921
Cbs	1661.84	-0.132456	0.101888	-1.30001	0.193597	0.868876
Cbwd1	2021.04	0.0226274	0.0842005	0.268732	0.788136	0.988678
Cbx1	3827.56	-0.130485	0.100547	-1.29776	0.194371	0.868876
Cbx2	234.126	-0.424619	0.166413	-2.5516	0.010723	0.370415
Cbx3	5435.29	-0.00563986	0.100102	-0.0563413	0.95507	0.997819
Cbx4	3575.19	-0.0298242	0.122251	-0.243959	0.807263	0.988678
Cbx5	29161.8	0.0143729	0.0485047	0.296319	0.766986	0.988678
Cbx6	378.579	-0.200591	0.283139	-0.708455	0.478663	0.959134
Cbx7	3595.41	-0.110849	0.0821875	-1.34873	0.177424	0.852828
Cbx8	693.05	-0.224594	0.158226	-1.41945	0.155769	0.831212
Cby1	2480.13	0.0117565	0.103717	0.113352	0.909752	0.994521
Cc2d1a	3849.53	0.0223942	0.0926053	0.241824	0.808916	0.988678
Cc2d1b	2864.96	0.029158	0.106192	0.274579	0.78364	0.988678
Cc2d2a	5275.87	0.0799293	0.130902	0.610605	0.541461	0.966859
Ccar1	8845.09	0.239657	0.150074	1.59693	0.110282	0.777389
Ccar2	7782.66	-0.0161437	0.0766725	-0.210554	0.833235	0.988895
Ccbe1	1737.68	-0.174475	0.187179	-0.932129	0.35127	0.938374
Ccbl1	1044.39	-0.067756	0.0884492	-0.766045	0.44365	0.950558
Ccbl2	518.76	-0.0154016	0.0696236	-0.221213	0.824927	0.988895
Ccdc106	2124.93	-0.0989308	0.12503	-0.791253	0.428796	0.948075
Ccdc107	1194.03	-0.172414	0.12506	-1.37866	0.168001	0.840028
Ccdc112	1326.64	0.248338	0.151213	1.64231	0.100526	0.768528
Ccdc113	363.61	0.353381	0.151237	2.33661	0.0194596	0.481295
Ccdc114	144.195	-0.269262	0.15931	-1.69018	0.0909942	0.753852
Ccdc115	1508.64	0.021542	0.140515	0.153308	0.878155	0.992501
Ccdc117	1490.27	-0.190371	0.0829648	-2.29459	0.0217565	0.503393
Ccdc12	2743.74	-0.111505	0.106773	-1.04432	0.296335	0.923335
Ccdc120	754.189	-0.117936	0.112039	-1.05264	0.292506	0.920188
Ccdc122	427.812	0.63597	0.229113	2.77579	0.0055067	0.269652
Ccdc124	4374.98	-0.155037	0.162519	-0.953961	0.340103	0.936571
Ccdc126	1146.79	-0.095281	0.0774678	-1.22994	0.218718	0.888265
Ccdc127	8369.59	0.0161913	0.0595522	0.271885	0.785711	0.988678
Ccdc129	281.498	0.26525	0.194016	1.36716	0.171577	0.843824
Ccdc13	550.152	-0.0287887	0.0933211	-0.308491	0.757709	0.988678
Ccdc130	1104.36	-0.043982	0.100695	-0.436785	0.662267	0.983688
Ccdc134	974.015	-0.265674	0.0932039	-2.85046	0.00436565	0.242061
Ccdc136	6639.66	-0.0577089	0.0779619	-0.740219	0.459167	0.952787
Ccdc137	1628.12	-0.163413	0.0615015	-2.65706	0.00788264	0.328169
Ccdc138	975.179	0.229778	0.158664	1.44821	0.147559	0.824719
Ccdc14	522.581	0.131121	0.107962	1.21451	0.224554	0.889282
Ccdc141	3954.78	-0.0275585	0.129622	-0.212606	0.831634	0.988895
Ccdc148	4683.98	0.330036	0.187613	1.75913	0.0785548	0.739336
Ccdc149	5779.58	0.0518143	0.054544	0.949953	0.342136	0.936571
Ccdc15	949.556	0.330963	0.159661	2.07291	0.0381803	0.614869
Ccdc151	516.019	0.0696985	0.102747	0.678353	0.497548	0.962433
Ccdc155	406.032	-0.149494	0.0960967	-1.55566	0.119788	0.793932
Ccdc157	2492.78	0.0182512	0.0835147	0.218539	0.827009	0.988895
Ccdc159	820.777	-0.105878	0.113653	-0.931589	0.351549	0.938374
Ccdc162	312.355	-0.0105813	0.14406	-0.0734505	0.941448	0.997617
Ccdc163	228.666	-0.0563457	0.0969617	-0.581113	0.561164	0.969282
Ccdc166	451.829	-0.0648482	0.143779	-0.451026	0.651971	0.983688
Ccdc167	1618.96	-0.0839608	0.0606329	-1.38474	0.166132	0.839351
Ccdc17	264.162	0.173232	0.116885	1.48207	0.138321	0.816203
Ccdc171	1981.35	0.137547	0.15533	0.885518	0.375877	0.942601
Ccdc173	669.404	0.227653	0.177249	1.28437	0.199012	0.874017
Ccdc174	2735.26	0.111138	0.139222	0.798277	0.42471	0.948075
Ccdc177	1803.77	0.0485122	0.0967603	0.501365	0.616115	0.977561
Ccdc18	342.632	0.370756	0.211822	1.75032	0.0800628	0.739624
Ccdc181	2305.74	0.0788631	0.132466	0.595348	0.551611	0.967314
Ccdc184	1375.46	-0.20253	0.137476	-1.47321	0.140695	0.819391
Ccdc186	8259.71	0.180941	0.143799	1.25829	0.208286	0.883236
Ccdc187	1617.29	0.253647	0.312051	0.812837	0.416311	0.947968
Ccdc190	521.932	0.0292999	0.13131	0.223136	0.82343	0.988895
Ccdc191	1405.99	0.0717399	0.146583	0.489414	0.624549	0.979698
Ccdc25	4023.62	0.0223357	0.0767518	0.291012	0.771042	0.988678
Ccdc28a	2271.92	0.0481882	0.0502311	0.95933	0.337393	0.936571
Ccdc28b	1831.58	-0.207864	0.100213	-2.07423	0.0380579	0.614869
Ccdc3	1413.85	-0.26769	0.0964483	-2.77548	0.00551201	0.269652
Ccdc30	3396.4	0.0579899	0.126987	0.456659	0.647916	0.982286
Ccdc32	2905.08	-0.0252011	0.0748393	-0.336736	0.736316	0.988678
Ccdc34	2151.3	0.426323	0.259395	1.64353	0.100273	0.768036
Ccdc39	2864.93	0.224719	0.139075	1.61581	0.106136	0.775584
Ccdc43	2142.98	-0.0468498	0.0601122	-0.779373	0.43576	0.948965
Ccdc47	8536.73	0.235678	0.178577	1.31976	0.186915	0.860371
Ccdc50	8307.65	0.0960821	0.0857688	1.12024	0.262609	0.905231
Ccdc51	624.21	-0.0997184	0.118184	-0.843754	0.398807	0.947336
Ccdc57	2263.25	0.0499066	0.138263	0.360954	0.718134	0.988602
Ccdc58	1516.23	0.0375997	0.0956394	0.393141	0.694216	0.98804
Ccdc59	2248.03	0.152357	0.109656	1.38941	0.164709	0.83919
Ccdc6	4964.13	-0.0296288	0.0793329	-0.373475	0.708795	0.98804
Ccdc61	730.39	-0.201286	0.175833	-1.14476	0.252309	0.900905
Ccdc62	461.441	0.145839	0.172209	0.846875	0.397065	0.947066
Ccdc65	618.958	0.0150016	0.111038	0.135103	0.89253	0.994016
Ccdc66	3384.34	0.205506	0.165599	1.24099	0.21461	0.887343
Ccdc71	2162.67	-0.00158238	0.101482	-0.0155927	0.987559	0.999178
Ccdc71l	1487.63	-0.0899728	0.105447	-0.853254	0.393519	0.945027
Ccdc74a	1029.71	-0.0610046	0.0913577	-0.667755	0.50429	0.963255
Ccdc77	849.714	0.0130025	0.0852216	0.152573	0.878735	0.992501
Ccdc79	620.81	0.198941	0.1191	1.67037	0.0948466	0.759945
Ccdc8	160.869	-0.610103	0.167987	-3.63185	0.000281397	0.0471744
Ccdc80	957.069	0.165212	0.120888	1.36665	0.171735	0.84428
Ccdc82	3628.85	0.195879	0.130631	1.49949	0.133748	0.80861
Ccdc84	831.806	-0.0471374	0.0791114	-0.595835	0.551285	0.967314
Ccdc85a	17895.4	0.141618	0.109382	1.2947	0.195422	0.869407
Ccdc85b	1005.52	-0.653128	0.546961	-1.1941	0.232437	0.892164
Ccdc85c	5474.37	-0.0345176	0.120087	-0.287439	0.773776	0.988678
Ccdc86	575.084	-0.0801052	0.107645	-0.744163	0.456778	0.952787
Ccdc87	196.899	0.137418	0.151876	0.904809	0.365567	0.940505
Ccdc88a	26602	0.343932	0.202154	1.70134	0.08888	0.753692
Ccdc88b	198.432	-0.188023	0.194266	-0.967868	0.33311	0.934962
Ccdc88c	5693.46	-0.039037	0.137334	-0.284249	0.77622	0.988678
Ccdc9	2738.35	-0.117318	0.106675	-1.09978	0.27143	0.911284
Ccdc90b	1902.76	0.3853	0.191781	2.00907	0.04453	0.639551
Ccdc91	5528.92	0.012609	0.058156	0.216814	0.828354	0.988895
Ccdc92	5015.46	-0.00721581	0.0861221	-0.0837858	0.933227	0.997236
Ccdc92b	2648.48	-0.120841	0.0471485	-2.56299	0.0103774	0.368581
Ccdc93	4135.69	-0.0554866	0.0577032	-0.961586	0.336258	0.936257
Ccdc94	703.341	0.0924146	0.13684	0.675349	0.499454	0.962433
Ccdc96	172.919	0.026345	0.150789	0.174714	0.861304	0.991192
Ccdc97	2228.83	-0.0774005	0.0959894	-0.806344	0.420045	0.948075
Cchcr1	354.023	-0.137986	0.153909	-0.896545	0.369962	0.941721
Cck	16786.9	-0.223074	0.249804	-0.892996	0.371859	0.94194
Cckbr	4022.34	0.0333933	0.13909	0.240083	0.810266	0.988678
Ccl25	1956.36	0.0247883	0.0961156	0.257901	0.796483	0.988678
Ccl27a	6953.63	-0.0634835	0.110048	-0.576873	0.564025	0.970201
Ccl28	324.446	0.0310762	0.231638	0.134158	0.893277	0.994016
Ccm2	4270.95	-0.0409317	0.107246	-0.381662	0.702712	0.98804
Ccm2l	266.382	-0.093539	0.105128	-0.889764	0.373593	0.942077
Ccnb1	402.953	-0.160623	0.364475	-0.440697	0.659432	0.983688
Ccnb1ip1	2034.51	-0.114467	0.63131	-0.181317	0.856119	0.990769
Ccnc	5128.8	0.239557	0.132269	1.81114	0.0701196	0.718637
Ccnd1	3690.87	-0.0980058	0.105174	-0.931842	0.351418	0.938374
Ccnd2	4149.43	-0.33709	0.113601	-2.96731	0.00300422	0.187244
Ccnd3	1377.8	-0.258907	0.120982	-2.14005	0.0323507	0.578913
Ccndbp1	3458.09	-0.000530379	0.0848071	-0.00625395	0.99501	0.999602
Ccne1	1165.3	-0.0559761	0.112279	-0.498546	0.618099	0.978342
Ccne2	865.141	0.0672081	0.158166	0.424922	0.670894	0.98624
Ccnf	405.903	-0.0880463	0.0779619	-1.12935	0.25875	0.904203
Ccng1	9353.53	0.063802	0.132612	0.481118	0.630432	0.980826
Ccng2	3468.61	-0.00928239	0.0961774	-0.0965132	0.923113	0.996198
Ccnh	6690.81	0.146126	0.0861376	1.69643	0.0898049	0.753692
Ccni	14172.5	0.0259825	0.0673575	0.385741	0.699689	0.98804
Ccnj	866.441	0.0409277	0.0868056	0.471488	0.637293	0.981199
Ccnjl	494.237	-0.117047	0.0849703	-1.3775	0.168357	0.840028
Ccnk	1922.73	0.0245591	0.0628836	0.390549	0.696131	0.98804
Ccnl1	4460.42	0.0432122	0.0898931	0.480706	0.630726	0.980826
Ccnl2	5536.92	-0.0860397	0.08629	-0.9971	0.318716	0.927513
Ccnt1	5748.53	-0.0272079	0.042636	-0.638145	0.523379	0.966753
Ccnt2	10855	0.00375383	0.0522975	0.0717784	0.942778	0.997617
Ccny	22315.4	0.0826262	0.0643525	1.28396	0.199155	0.874017
Ccnyl1	3692.35	0.08675	0.0946336	0.916693	0.359303	0.938374
Ccp110	7338.86	0.0281295	0.0616876	0.456	0.64839	0.982286
Ccpg1os	628.762	0.119497	0.164344	0.727115	0.467156	0.95655
Ccr5	276.446	-0.160431	0.12067	-1.3295	0.183684	0.857516
Ccs	1896.8	-0.0773382	0.0834511	-0.926749	0.354057	0.938374
Ccsap	5083.41	-0.0641215	0.0577287	-1.11074	0.266681	0.906701
Ccser1	74526.2	0.301556	0.165744	1.81941	0.0688496	0.713642
Ccser2	16862.2	0.120452	0.0811158	1.48493	0.137561	0.815056
Cct2	11284.1	0.0757556	0.0836016	0.90615	0.364856	0.939942
Cct3	9623.15	0.0428558	0.125148	0.342441	0.732019	0.988678
Cct4	8293.04	0.00493121	0.136077	0.0362383	0.971092	0.998406
Cct5	13785.8	0.0344129	0.134516	0.255827	0.798085	0.988678
Cct7	14256.7	-0.0108498	0.152959	-0.0709329	0.943451	0.997617
Cct8	14571.7	0.00509625	0.0719295	0.0708506	0.943517	0.997617
Ccz1	3296.28	-0.0573486	0.0737043	-0.778091	0.436515	0.949144
Cd109	133.706	-0.270358	0.182417	-1.48209	0.138317	0.816203
Cd151	1680.72	-0.0549775	0.175218	-0.313766	0.753699	0.988678
Cd163	181.188	-0.40362	0.230397	-1.75184	0.0798006	0.739624
Cd164	5188.91	-0.0292964	0.062622	-0.46783	0.639906	0.981199
Cd164l2	347.107	-0.12604	0.150598	-0.83693	0.402632	0.947603
Cd180	187.305	0.53269	0.150126	3.54828	0.000387754	0.0547195
Cd200	7065.97	0.134559	0.086028	1.56413	0.117787	0.787641
Cd248	208.721	-0.270617	0.133892	-2.02117	0.0432624	0.632152
Cd24a	529.588	-0.0323703	0.155881	-0.207661	0.835494	0.988895
Cd274	145.127	0.152992	0.156156	0.979735	0.327217	0.9304
Cd276	1125.91	0.0568678	0.081922	0.69417	0.487576	0.960416
Cd2ap	7725.29	0.230468	0.155958	1.47776	0.139473	0.818897
Cd2bp2	6139.15	-0.0917786	0.0645616	-1.42157	0.155153	0.830683
Cd300d	256.636	-0.155589	0.137176	-1.13423	0.256699	0.901586
Cd302	1099.59	-0.0940665	0.15087	-0.623493	0.532961	0.966753
Cd320	1215.13	-0.0310292	0.0884206	-0.350927	0.725643	0.988678
Cd33	456.09	0.0908299	0.11415	0.795707	0.426202	0.948075
Cd34	5365.32	0.171268	0.124385	1.37692	0.168537	0.840028
Cd37	166.122	0.112693	0.163534	0.689112	0.490753	0.96102
Cd38	301.821	0.0297075	0.159198	0.186608	0.851968	0.989951
Cd3eap	1533.5	-0.0776238	0.138271	-0.561389	0.574532	0.97212
Cd4	670.987	0.106456	0.237601	0.448044	0.654122	0.983688
Cd44	272.426	-0.255392	0.178495	-1.43081	0.152485	0.830145
Cd46	4110.19	0.399632	0.268209	1.49	0.136224	0.813301
Cd47	11479	0.0856785	0.0761002	1.12586	0.260223	0.905113
Cd53	588.557	0.0727147	0.0979978	0.742004	0.458085	0.952787
Cd55	768.304	-0.00189762	0.15918	-0.0119213	0.990488	0.999178
Cd59a	341.439	-0.16425	0.1863	-0.88164	0.377971	0.942601
Cd59b	147.538	0.416947	0.234597	1.77729	0.0755212	0.736677
Cd6	194.526	-0.194194	0.192241	-1.01016	0.312419	0.92631
Cd63	1323.79	-0.180118	0.156335	-1.15213	0.249268	0.898078
Cd68	566.723	0.1178	0.110981	1.06145	0.288487	0.920188
Cd74	337.895	-0.553537	0.165001	-3.35475	0.000794358	0.0858171
Cd81	21326.6	-0.0356419	0.0867942	-0.410648	0.681331	0.98804
Cd82	1088.22	0.0273835	0.113521	0.241219	0.809386	0.988678
Cd83	1108.48	-0.00333028	0.140139	-0.0237642	0.981041	0.99881
Cd84	404.52	0.0954136	0.140376	0.679701	0.496694	0.962433
Cd86	230.485	0.147015	0.105736	1.39041	0.164406	0.83919
Cd9	2344.23	0.0631445	0.112895	0.559322	0.575942	0.97212
Cd93	765.65	0.0180643	0.0998147	0.180979	0.856384	0.990772
Cd99l2	8801.34	0.0516681	0.0809826	0.638014	0.523464	0.966753
Cda	167.422	-0.0598228	0.111393	-0.537043	0.591238	0.9746
Cdadc1	4807.35	-0.0456417	0.100626	-0.453577	0.650134	0.98324
Cdan1	2102.87	-0.0851058	0.099623	-0.854279	0.39295	0.945027
Cdc123	6574.13	0.102592	0.0795828	1.28912	0.197355	0.871429
Cdc14a	641.422	0.0529367	0.125044	0.423344	0.672045	0.98624
Cdc14b	2538.26	0.0380416	0.0957324	0.397374	0.691091	0.98804
Cdc16	5123.21	0.0159554	0.0774674	0.205963	0.83682	0.988895
Cdc23	4411.19	-0.017283	0.0432472	-0.399633	0.689427	0.98804
Cdc25a	462.312	-0.171277	0.121757	-1.40671	0.159513	0.833665
Cdc25b	795.676	-0.1036	0.116501	-0.889265	0.373861	0.942077
Cdc26	1709.4	-0.00365102	0.0795317	-0.0459065	0.963385	0.997979
Cdc27	11880.8	0.168515	0.0848057	1.98707	0.0469144	0.651572
Cdc34	2574.75	-0.129856	0.150382	-0.863502	0.387862	0.944771
Cdc37	5896.22	-0.0675085	0.123756	-0.545495	0.585413	0.973395
Cdc37l1	15581.6	0.0371482	0.0929423	0.399691	0.689384	0.98804
Cdc40	5983.75	0.122001	0.0718541	1.6979	0.0895273	0.753692
Cdc42	25080.1	0.0065699	0.0633936	0.103637	0.917458	0.995585
Cdc42bpa	53393.6	0.188277	0.127732	1.474	0.140481	0.819107
Cdc42bpb	16337	0.0357489	0.0651424	0.548781	0.583156	0.972597
Cdc42bpg	270.752	-0.303687	0.191533	-1.58555	0.11284	0.786063
Cdc42ep1	1295.9	0.0700698	0.0936216	0.748436	0.454197	0.952365
Cdc42ep2	808.329	-0.0347008	0.116886	-0.296878	0.76656	0.988678
Cdc42ep3	1777.39	0.0567514	0.108604	0.522553	0.601285	0.975695
Cdc42ep4	2433.93	-0.226732	0.10856	-2.08855	0.0367479	0.605336
Cdc42se1	3640.54	-0.0694016	0.0720085	-0.963798	0.335147	0.935038
Cdc42se2	14430.1	0.0471338	0.0747451	0.630594	0.528306	0.966753
Cdc45	158.77	-0.0872104	0.119682	-0.728681	0.466197	0.95655
Cdc5l	6691.49	0.0154822	0.0520594	0.297394	0.766166	0.988678
Cdc7	1579.35	0.0332059	0.0917612	0.361873	0.717447	0.988602
Cdc73	9275.9	0.144944	0.125112	1.15851	0.246656	0.896955
Cdca4	755.176	0.0356846	0.068549	0.520571	0.602666	0.975695
Cdca7	282.407	-0.205818	0.187718	-1.09642	0.272896	0.911826
Cdh1	190.395	-0.917115	0.527749	-1.73779	0.0822487	0.742551
Cdh10	26440.2	0.298363	0.155259	1.92171	0.0546426	0.672732
Cdh11	27293.4	0.198663	0.137313	1.44679	0.147957	0.824719
Cdh12	31530.9	0.251049	0.173055	1.45069	0.146866	0.824719
Cdh13	18520.1	0.109649	0.14729	0.744445	0.456607	0.952787
Cdh18	41428.3	0.3842	0.16865	2.27809	0.0227211	0.512272
Cdh19	2222.24	0.168791	0.183147	0.921617	0.356729	0.938374
Cdh2	28077.2	0.011577	0.107919	0.107275	0.914571	0.994841
Cdh20	10036.1	0.238814	0.148803	1.6049	0.108515	0.776892
Cdh22	4145.61	-0.150672	0.141906	-1.06178	0.288337	0.920188
Cdh23	291.786	0.103367	0.196453	0.526168	0.598771	0.975695
Cdh24	695.98	-0.161708	0.106899	-1.51272	0.13035	0.80861
Cdh4	6397.73	-0.0367131	0.171422	-0.214168	0.830416	0.988895
Cdh5	1208.62	-0.0776931	0.0889326	-0.873617	0.382327	0.942782
Cdh6	5949.23	0.260482	0.12361	2.1073	0.0350919	0.596076
Cdh7	6606.14	0.284326	0.11913	2.38667	0.0170015	0.459183
Cdh8	21167.1	0.468918	0.18107	2.58971	0.00960581	0.36306
Cdh9	9546.44	0.480748	0.173506	2.77078	0.00559217	0.271524
Cdhr1	1074.62	-0.517338	0.471737	-1.09667	0.272787	0.911826
Cdhr3	155.602	0.0760871	0.139104	0.54698	0.584392	0.972863
Cdip1	15508.1	0.0155409	0.0607159	0.25596	0.797981	0.988678
Cdipt	7044.33	-0.0400123	0.109463	-0.365532	0.714715	0.988139
Cdk11b	4569.7	0.148471	0.173959	0.853482	0.393392	0.945027
Cdk12	9442.73	0.115182	0.108158	1.06494	0.286904	0.919685
Cdk13	16520.8	0.160935	0.137496	1.17047	0.241813	0.894987
Cdk14	35477.6	0.0456989	0.0934233	0.48916	0.624728	0.979752
Cdk16	13686.6	-0.0426598	0.074277	-0.574333	0.565742	0.971429
Cdk17	34383	0.105874	0.0842407	1.2568	0.208824	0.883441
Cdk18	1990.09	0.147703	0.126755	1.16526	0.243913	0.895926
Cdk19	10718.3	-0.00706946	0.0822583	-0.0859422	0.931512	0.997236
Cdk2	125.642	-0.10132	0.140857	-0.71931	0.47195	0.95694
Cdk20	575.655	-0.246247	0.139797	-1.76146	0.0781603	0.739107
Cdk2ap1	2473.48	-0.055601	0.190798	-0.291412	0.770736	0.988678
Cdk2ap2	869.057	-0.0724578	0.181633	-0.398925	0.689948	0.98804
Cdk4	2472.05	-0.10998	0.0846316	-1.29952	0.193765	0.868876
Cdk5	6069.49	-0.051279	0.0694827	-0.738011	0.460508	0.954135
Cdk5r1	19512.6	-0.0556729	0.0798273	-0.697417	0.485542	0.960416
Cdk5rap1	1429.51	-0.0533704	0.0810737	-0.658295	0.510349	0.96572
Cdk5rap2	3758.33	0.0441884	0.0926089	0.477151	0.633255	0.980826
Cdk5rap3	1333.48	-0.0172792	0.103844	-0.166396	0.867845	0.991798
Cdk6	679	0.0535962	0.143509	0.37347	0.708799	0.98804
Cdk7	3116.52	-0.0414955	0.0608186	-0.682283	0.49506	0.96187
Cdk8	7797.64	0.0303158	0.101181	0.29962	0.764467	0.988678
Cdk9	4311.28	-0.100053	0.0756715	-1.32221	0.1861	0.860371
Cdkal1	10561.5	0.139694	0.138821	1.00629	0.314276	0.926863
Cdkl1	1871.47	0.0261224	0.0716752	0.364456	0.715518	0.988223
Cdkl2	3826.18	0.0486914	0.0631155	0.771465	0.440431	0.950558
Cdkl3	1713.63	0.138662	0.103044	1.34566	0.178412	0.852931
Cdkl4	1479.34	0.00172464	0.0983495	0.0175359	0.986009	0.999178
Cdkl5	37097.9	0.225753	0.0881153	2.56202	0.0104067	0.368612
Cdkn1a	743.763	-0.176918	0.219207	-0.807083	0.419619	0.948075
Cdkn1b	3443.57	-0.102733	0.0917301	-1.11995	0.262734	0.905231
Cdkn1c	295.832	0.0341095	0.202042	0.168824	0.865935	0.991424
Cdkn2aip	1972.06	-0.00990649	0.132364	-0.074843	0.94034	0.997617
Cdkn2aipnl	2693.47	0.0552376	0.111021	0.497543	0.618806	0.978342
Cdkn2c	184.502	-0.127901	0.121391	-1.05363	0.292051	0.920188
Cdkn2d	2199.38	-0.0353453	0.131231	-0.269338	0.78767	0.988678
Cdo1	2183.36	-0.0734758	0.0878727	-0.836162	0.403064	0.947603
Cdon	2978.93	0.0568281	0.115767	0.490884	0.623509	0.979664
Cdpf1	659.917	-0.122981	0.11512	-1.06829	0.285388	0.917706
Cdr2	991.836	0.0692837	0.108534	0.638358	0.523241	0.966753
Cdr2l	2247.73	-0.0923522	0.0789568	-1.16965	0.24214	0.894987
Cds1	7953.9	-0.00752468	0.0596188	-0.126213	0.899563	0.994016
Cds2	42737.9	-0.0516663	0.106443	-0.485391	0.627399	0.980826
Cdv3	6678.19	-0.0820213	0.0701632	-1.16901	0.2424	0.895037
Cdyl	5236.41	-0.0587071	0.0887958	-0.661147	0.508518	0.965528
Cdyl2	2775.06	-0.183985	0.130676	-1.40795	0.159145	0.833263
Ceacam1	248.514	0.350686	0.207542	1.68971	0.0910825	0.754019
Cebpa	285.038	-0.289213	0.198706	-1.45548	0.145536	0.824259
Cebpb	183.984	-0.275947	0.206827	-1.3342	0.182139	0.855591
Cebpd	171.543	-0.723091	0.235783	-3.06676	0.0021639	0.151691
Cebpg	3299.18	-0.0787539	0.0666896	-1.1809	0.237641	0.893056
Cebpz	4671.88	0.0603391	0.0967724	0.623515	0.532946	0.966753
Cebpzos	1051.21	-0.112855	0.1169	-0.965394	0.334348	0.934962
Cecr2	834.047	-0.170856	0.164095	-1.0412	0.297782	0.923669
Cecr5	4461.68	-0.158451	0.0631516	-2.50906	0.0121051	0.396291
Cecr6	4759.88	-0.230611	0.0826913	-2.78882	0.00529006	0.269652
Celf1	26579.7	0.0720609	0.0614384	1.1729	0.240837	0.894987
Celf2	399101	0.264355	0.17499	1.51069	0.130868	0.80861
Celf3	7540.17	0.0536851	0.112372	0.477743	0.632833	0.980826
Celf4	54795.8	0.115373	0.102289	1.12791	0.259358	0.904203
Celf5	11210.8	0.0621835	0.0814515	0.763443	0.4452	0.950558
Celf6	1740.85	0.0294446	0.117767	0.250024	0.802569	0.988678
Celsr1	680.278	-0.0982777	0.135031	-0.727814	0.466727	0.95655
Celsr2	20439	0.146584	0.092117	1.59128	0.111546	0.780404
Celsr3	6636.87	-0.00625673	0.119503	-0.0523562	0.958245	0.997979
Cemip	4006.98	-0.257997	0.132285	-1.95032	0.0511382	0.661633
Cend1	18298.4	0.10293	0.142093	0.72439	0.468826	0.956592
Cenpc1	4828.81	0.211181	0.14857	1.42143	0.155192	0.830683
Cenpe	204.139	0.307075	0.212214	1.447	0.147896	0.824719
Cenpj	459.681	0.0360701	0.132314	0.27261	0.785153	0.988678
Cenpk	181.494	0.589911	0.250535	2.35461	0.0185422	0.471334
Cenpo	620.232	0.164581	0.0973419	1.69075	0.0908845	0.753852
Cenpp	787.625	0.312633	0.213743	1.46266	0.143561	0.821555
Cenpq	473.881	0.312395	0.174567	1.78954	0.0735285	0.730989
Cenpt	958.638	-0.0692271	0.102411	-0.675971	0.499059	0.962433
Cenpu	346.611	-0.0343323	0.112307	-0.3057	0.759833	0.988678
Cenpv	1982.94	0.081773	0.108732	0.752061	0.452015	0.951822
Cenpw	295.569	0.140933	0.14504	0.97168	0.33121	0.9339
Cep104	2756.41	-0.0985492	0.0723405	-1.3623	0.173105	0.847355
Cep112	7708.21	0.523389	0.187756	2.7876	0.00530999	0.269652
Cep120	5678.21	0.0649749	0.0760414	0.854467	0.392846	0.945027
Cep126	3967.09	0.199987	0.136615	1.46388	0.143227	0.821555
Cep128	2122.58	0.182179	0.176435	1.03255	0.301814	0.925515
Cep131	1989.31	-0.0599664	0.137903	-0.434844	0.663676	0.983827
Cep135	1852.78	0.10306	0.117434	0.8776	0.380161	0.942601
Cep152	806.238	-0.042596	0.122125	-0.348791	0.727246	0.988678
Cep162	3540.5	0.112954	0.159004	0.710385	0.477466	0.959134
Cep164	2626.12	-0.0616151	0.121941	-0.505284	0.613359	0.977387
Cep170	18267.2	0.131521	0.118066	1.11396	0.265296	0.906573
Cep170b	19961.7	0.00165089	0.093548	0.0176475	0.98592	0.999178
Cep19	5504.04	-0.0196734	0.103358	-0.190342	0.849041	0.98931
Cep192	1731.75	0.0812837	0.129644	0.626976	0.530675	0.966753
Cep250	3878.59	-0.0184752	0.130053	-0.142059	0.887034	0.99275
Cep290	6280.4	0.279559	0.196042	1.42602	0.153862	0.830447
Cep295	6287.78	0.177021	0.0996045	1.77724	0.0755282	0.736677
Cep350	15249.8	0.0998837	0.119425	0.83637	0.402947	0.947603
Cep41	744.724	0.0592316	0.105756	0.560078	0.575427	0.97212
Cep44	1629.73	0.0670447	0.0863881	0.776088	0.437697	0.949993
Cep57	1987.25	0.133512	0.092558	1.44246	0.149171	0.825258
Cep57l1	1412.39	0.0453619	0.111829	0.405636	0.68501	0.98804
Cep63	3087.97	0.131778	0.0693955	1.89894	0.057572	0.681987
Cep68	3429.46	-0.0360098	0.068836	-0.523124	0.600888	0.975695
Cep70	3955.23	0.166909	0.121678	1.37172	0.17015	0.842883
Cep72	165.974	0.128153	0.118595	1.08059	0.279879	0.914746
Cep76	836.498	-0.0722337	0.0916475	-0.788169	0.430598	0.948075
Cep78	1979.16	-0.00472554	0.0964051	-0.0490175	0.960905	0.997979
Cep83	8671.72	0.149543	0.128033	1.168	0.242807	0.895265
Cep85	2534.87	-0.0255505	0.0549517	-0.464963	0.641958	0.981766
Cep85l	7127.72	0.298168	0.142815	2.08779	0.036817	0.605706
Cep89	1704.31	-0.0656242	0.0689577	-0.95166	0.34127	0.936571
Cep95	1947.93	0.00558529	0.0878366	0.0635872	0.949299	0.997813
Cep97	3194.53	-0.0736471	0.0632152	-1.16502	0.244009	0.895926
Cept1	6531.97	0.0412839	0.0722536	0.571375	0.567746	0.971429
Cercam	419.749	0.0522833	0.129361	0.404166	0.686091	0.98804
Cerk	5766.45	-0.0665931	0.0539693	-1.23391	0.217238	0.888265
Cerkl	621.081	0.179656	0.143973	1.24784	0.212088	0.887249
Cers1	4951.39	-0.0664567	0.0848868	-0.782885	0.433694	0.948238
Cers2	3188.94	-0.0244678	0.084798	-0.288543	0.772931	0.988678
Cers4	5937.68	0.107218	0.0977129	1.09727	0.272523	0.911826
Cers5	4721.13	0.0128344	0.0621194	0.206609	0.836315	0.988895
Cers6	16109.6	0.0330311	0.091022	0.362891	0.716687	0.98837
Cetn2	2903.5	0.0895228	0.130722	0.684836	0.493448	0.961401
Cetn3	6118.04	0.127002	0.126902	1.00079	0.31693	0.927513
Cetn4	657.643	0.354205	0.187844	1.88564	0.0593435	0.683652
Cfap100	515.094	-0.296994	0.13029	-2.27948	0.0226387	0.511302
Cfap20	4091.48	0.000880197	0.09016	0.00976261	0.992211	0.999178
Cfap206	240.759	0.364683	0.14596	2.49852	0.0124714	0.404582
Cfap36	9472.58	0.133982	0.0987043	1.3574	0.174653	0.847696
Cfap43	198.627	0.0463378	0.124031	0.373598	0.708704	0.98804
Cfap44	616.842	0.190001	0.196324	0.967792	0.333148	0.934962
Cfap45	406.953	0.00363052	0.113376	0.0320219	0.974455	0.998515
Cfap46	562.386	0.114925	0.15234	0.754399	0.45061	0.951822
Cfap54	2906.02	0.197283	0.158319	1.24612	0.212721	0.887249
Cfap61	452.982	0.0788443	0.0935772	0.842558	0.399476	0.947336
Cfap65	279.336	0.190525	0.173609	1.09744	0.27245	0.911826
Cfap69	3026.45	0.0697221	0.116953	0.596154	0.551073	0.967314
Cfap70	195.763	0.183033	0.195553	0.935975	0.349286	0.93807
Cfap74	1404.3	0.0625007	0.0966465	0.646693	0.51783	0.966753
Cfap97	3883.34	0.161789	0.0923835	1.75128	0.0798976	0.739624
Cfap99	356.722	0.166729	0.107259	1.55445	0.120077	0.794303
Cfdp1	6974.02	0.0352395	0.141023	0.249885	0.802677	0.988678
Cfh	3234.95	-0.233614	0.134034	-1.74294	0.0813437	0.740828
Cfl1	51837.8	-0.0258315	0.11762	-0.219618	0.826169	0.988895
Cfl2	5448.22	0.063693	0.0748323	0.851142	0.39469	0.945027
Cflar	2438.69	-0.0796822	0.0693514	-1.14896	0.250571	0.899336
Cfp	552.48	-0.174467	0.115994	-1.50409	0.132557	0.80861
Cftr	334.68	0.520056	0.200644	2.59193	0.00954381	0.361772
Cggbp1	6346.04	0.0199177	0.0919857	0.21653	0.828574	0.988895
Cgn	463.677	0.153535	0.161977	0.947878	0.343192	0.936571
Cgnl1	1910.07	-0.238158	0.0839358	-2.83738	0.00454848	0.249858
Cgref1	1337.78	0.106256	0.113791	0.933784	0.350416	0.938374
Cgrrf1	1888.31	0.00155842	0.0643162	0.0242305	0.980669	0.99881
CH25-588N10.2	1342.72	0.244446	0.106437	2.29663	0.02164	0.503017
CH36-200G6.4	4764.07	-0.0160123	0.0556126	-0.287926	0.773403	0.988678
Chac1	724.693	-0.0444805	0.182545	-0.243669	0.807487	0.988678
Chac2	961.111	0.0488052	0.116122	0.420291	0.674273	0.98637
Chadl	866.091	-0.110958	0.149829	-0.740567	0.458956	0.952787
Chaf1a	398.765	0.00103652	0.114838	0.00902589	0.992798	0.999178
Champ1	3612.09	0.0629024	0.0485728	1.29501	0.195316	0.869232
Chat	441.122	0.232515	0.26236	0.886243	0.375487	0.942601
Chchd1	1570.84	-0.0949758	0.193271	-0.491412	0.623135	0.979664
Chchd10	10482.9	-0.0591219	0.200391	-0.295032	0.76797	0.988678
Chchd3	14258.7	0.100441	0.0960313	1.04592	0.2956	0.923335
Chchd4	2263.92	-0.0990255	0.14844	-0.667107	0.504704	0.963628
Chchd5	660.917	0.0927362	0.141671	0.654587	0.512734	0.966403
Chchd6	9561.39	0.0272939	0.0993298	0.274781	0.783484	0.988678
Chchd7	1982.08	-0.0147685	0.0544631	-0.271164	0.786265	0.988678
Chd1	15674.6	0.143162	0.120707	1.18603	0.23561	0.892764
Chd1l	1127.48	-0.00769452	0.0973048	-0.0790764	0.936972	0.997403
Chd2	17457.1	0.0120576	0.0874603	0.137863	0.890348	0.993585
Chd3	52139	0.0131705	0.161441	0.0815808	0.93498	0.997236
Chd3os	7804.49	0.0630749	0.106745	0.590891	0.554594	0.96793
Chd4	22427.3	-0.0639569	0.0563673	-1.13464	0.256524	0.901586
Chd5	24524.6	0.0451683	0.0814656	0.554446	0.579273	0.97212
Chd6	21789	0.122279	0.119801	1.02069	0.307402	0.92631
Chd7	3296.39	-0.00352914	0.139455	-0.0253067	0.97981	0.99881
Chd8	13417.7	0.0533239	0.0667994	0.798269	0.424714	0.948075
Chd9	25953.1	0.0191138	0.0976278	0.195782	0.844781	0.988895
CHDC2	659.623	0.324947	0.186339	1.74385	0.0811859	0.740828
Chdh	428.318	-0.23853	0.155057	-1.53834	0.123967	0.802149
Chek1	150.84	0.0690394	0.1523	0.453312	0.650324	0.983413
Chek2	132.149	-0.15754	0.155013	-1.0163	0.309485	0.92631
Cherp	2525.07	0.0283547	0.0904852	0.313363	0.754005	0.988678
Chfr	4772.8	-0.0345421	0.0982424	-0.351601	0.725137	0.988678
Chga	11290.4	0.0224055	0.112684	0.198834	0.842392	0.988895
Chgb	39850.2	0.104369	0.209245	0.498789	0.617928	0.978342
Chic1	6819.6	0.126687	0.0724432	1.74877	0.0803304	0.739624
Chic2	3410.43	0.0397084	0.110436	0.35956	0.719176	0.988602
Chid1	5748.29	-0.0547708	0.0641133	-0.854282	0.392949	0.945027
Chil1	538.037	0.0165261	0.165213	0.10003	0.920321	0.995703
Chka	7720.42	-0.0674618	0.068633	-0.982935	0.32564	0.9304
Chl1	24845.1	0.218247	0.103914	2.10026	0.0357059	0.598737
Chm	13084.2	0.279573	0.161164	1.73471	0.082792	0.742551
Chmp1a	5484.53	-0.060381	0.150537	-0.401103	0.688344	0.98804
Chmp2a	6382.07	0.0422797	0.125049	0.338105	0.735284	0.988678
Chmp2b	3720.06	-0.014033	0.0861162	-0.162955	0.870554	0.992501
Chmp3	12466	0.0175245	0.0838854	0.20891	0.834518	0.988895
Chmp4b	10659.3	-0.108721	0.136322	-0.797536	0.42514	0.948075
Chmp5	6422.82	0.0124231	0.0841566	0.147619	0.882643	0.992501
Chmp6	1867.88	-0.0822521	0.157102	-0.523559	0.600585	0.975695
Chmp7	6394.83	-0.0170273	0.0868972	-0.195948	0.844651	0.988895
Chn1	85605.1	0.0674343	0.100731	0.669449	0.503209	0.962762
Chn2	7506.6	0.140328	0.134292	1.04495	0.296046	0.923335
Chordc1	10372.6	0.0682681	0.0724528	0.942241	0.346069	0.936571
Chp1	9058.56	0.0154312	0.0732181	0.210757	0.833077	0.988895
Chpf	5067.87	0.00562557	0.182683	0.0307941	0.975434	0.998515
Chpf2	6480.9	-0.0712465	0.123426	-0.577238	0.563778	0.970113
Chpt1	7450.6	0.160284	0.137037	1.16964	0.242146	0.894987
Chrac1	913.609	0.0792076	0.0948935	0.834701	0.403886	0.947603
Chrd	1930.37	-0.226174	0.133801	-1.69038	0.0909562	0.753852
Chrdl1	1345.51	0.104605	0.126126	0.829372	0.406894	0.947603
Chrm1	11597.8	0.0164923	0.0471191	0.350012	0.726329	0.988678
Chrm2	6150.36	0.0402688	0.159919	0.251808	0.801189	0.988678
Chrm3	35072.7	0.286981	0.178312	1.60943	0.107522	0.776892
Chrm4	1496.63	-0.116646	0.143941	-0.810375	0.417725	0.948072
Chrna4	3479.7	0.146493	0.0766755	1.91056	0.0560607	0.679004
Chrna5	272.683	-0.134793	0.22779	-0.59174	0.554025	0.96793
Chrna7	4234.95	0.289447	0.120571	2.40064	0.0163664	0.447364
Chrnb2	4598.27	-0.0214559	0.0682237	-0.314494	0.753146	0.988678
Chst1	11085.6	-0.0572055	0.0752477	-0.76023	0.447117	0.951638
Chst10	5648.55	-0.0204027	0.0705248	-0.289299	0.772353	0.988678
Chst11	7828.63	-0.0651932	0.11637	-0.560224	0.575327	0.97212
Chst12	1086.62	-0.0827519	0.0960317	-0.861714	0.388845	0.944771
Chst2	10666.9	0.097331	0.0689415	1.41179	0.158012	0.831737
Chst3	235.944	-0.17148	0.134677	-1.27326	0.202924	0.877818
Chst7	147.454	-0.206983	0.204399	-1.01264	0.311233	0.92631
Chst8	1202.75	-0.143711	0.0942474	-1.52483	0.127301	0.807728
Chst9	500.938	0.148146	0.226352	0.654492	0.512795	0.966403
Chsy1	3306.5	-0.0673971	0.100247	-0.672313	0.501385	0.962762
Chsy3	39103.9	0.260513	0.150747	1.72815	0.0839614	0.747388
Chtf8	5859.04	-0.0526341	0.0832424	-0.632299	0.527192	0.966753
Chtop	11898.2	-0.0184774	0.0907599	-0.203586	0.838677	0.988895
Chuk	6084.84	-0.0419418	0.0807691	-0.51928	0.603565	0.976004
Churc1	409.307	-0.0516226	0.262888	-0.196367	0.844323	0.988895
Ciao1	4488.08	-0.00451036	0.0926591	-0.0486769	0.961177	0.997979
Ciapin1	3383.04	-0.0860417	0.118233	-0.72773	0.466779	0.95655
Ciart	931.688	-0.188297	0.147289	-1.27842	0.2011	0.875979
Cib1	555.844	-0.0742404	0.216409	-0.343056	0.731557	0.988678
Cib2	1293.56	-0.0496745	0.143576	-0.34598	0.729358	0.988678
Cic	9778.45	0.0989291	0.106405	0.929742	0.352505	0.938374
Cinp	4014.33	0.0338857	0.0898443	0.377161	0.706054	0.98804
Cipc	9692.85	-0.0145668	0.0366523	-0.397431	0.691049	0.98804
Cir1	2834.55	0.0801918	0.122592	0.654134	0.513026	0.966403
Cirbp	4354.26	0.0915184	0.141947	0.644738	0.519097	0.966753
Cisd1	5464.33	-0.101978	0.285119	-0.357669	0.720591	0.988602
Cisd2	4843.04	0.0497224	0.0518549	0.958875	0.337622	0.936571
Cisd3	987.742	-0.0404742	0.14829	-0.27294	0.7849	0.988678
Cish	252.476	-0.324544	0.136624	-2.37545	0.0175275	0.463729
Cit	11665.3	-0.0188555	0.0726441	-0.25956	0.795203	0.988678
Cited2	1346.55	0.0297412	0.134771	0.220679	0.825342	0.988895
Cited4	411.038	-0.143886	0.159718	-0.900874	0.367655	0.941387
Ciz1	3531.76	0.0667552	0.119957	0.556492	0.577875	0.97212
Ckap4	1367.76	-0.0928764	0.0950489	-0.977143	0.328498	0.9304
Ckap5	28041.3	0.105813	0.08964	1.18043	0.237831	0.893056
Ckb	96367.6	-0.062747	0.194807	-0.322098	0.747379	0.988678
Cklf	309.591	-0.0549346	0.113811	-0.482682	0.629321	0.980826
[truncated: 10,964 more rows]

## Sheet: Genes Fig.1D
SHARED_UP	SHARED_DN	SD_UNIQUE_UP	SD_UNIQUE_DN	RS_UNIQUE_UP	RS_UNIQUE_DN
(1894 genes)	(1750 genes)	(1313 genes)	(1290 genes)	(94 genes)	(89 genes)
Aar2	2900055J20Rik	2410015M20Rik	2510009E07Rik	Abcg2	Abat
Abca2	8030462N17Rik	9930104L06Rik	9930111J21Rik2	AC130827.2	Abhd4
Abcc10	Aatf	A2m	Aaed1	Atp6v0a4	AC116475.2
Abcc3	Abca5	A4galt	Aasdhppt	Atp7a	Ache
Abhd11	Abcb1b	Aacs	Abca17	Aven	Aldh3b1
Abi3	Abcd2	Aars2	Abca6	Bcl2	Amigo2
Abt1	Abce1	Abcb10	Abca8b	Bcorl1	Arhgap27
AC104325.1	Abhd17b	Abcc6	Abcb4	Bicc1	Ass1
AC123686.4	Abhd3	Abcd4	Abcb7	Boc	B3galt5
AC125061.1	Ablim1	Abhd16a	Abi1	Btbd9	Bsn
AC157774.6	AC099860.1	Abhd17a	Abi2	Cemip	Cacna2d2
AC159257.5	AC102628.1	Abhd8	Abi3bp	Col26a1	Ccdc177
AC161108.3	AC123679.2	Abtb1	AC090443.3	Col8a1	Ccdc187
Acaa1a	AC129337.1	AC107707.3	AC103635.1	Coro2a	Cd37
Acacb	AC158971.1	AC114005.5	AC114558.6	Crebzf	Celsr2
Acad12	AC163993.2	AC123684.1	AC114920.2	Creg2	Clic6
Acads	Acadsb	AC129188.1	AC116718.1	Dr1	Col6a1
Acadvl	Acbd5	AC162528.2	AC117750.1	Elf1	Cops6
Acap3	Acbd6	AC163329.3	AC121113.1	Enpep	Cstad
Acot1	Acer3	AC163616.2	AC131791.1	Fam118b	Cxx1b
Acot11	Acsl4	Acan	AC139063.2	Fbn2	Cyb5rl
Acot2	Acvr1	Acbd4	AC157555.1	Frmd6	Dhcr7
Acot8	Acvr2a	Ackr3	AC162689.1	Gli3	Dlx5
Acsbg1	Acyp2	Acot5	Ace2	Gpsm2	Dnah2
Actr5	Adam10	Acot7	Acsl3	Grik4	Drd3
Acvr2b	Adam22	Acrbp	Acvr1c	Gxylt1	Entpd4
Acy1	Adam23	Acta2	Adam18	Hcfc2	Evpl
Adat2	Adam33	Actg1	Adam21	Hivep3	Fam71e1
Adck3	Adamts17	Actr1a	Adam32	Hsd11b1	Fchsd1
Adcy3	Adamts18	Acvrl1	Adamts16	Jmy	Fkbp1a
Adcy4	Adamts20	Adam15	Adamts6	Kdm2a	Gal3st3
Adcy5	Adcy10	Adam8	Adamtsl1	Klf10	Gngt2
Adcyap1r1	Adcy2	Adamts10	Adarb2	Klhl29	Gpr83
Adgra2	Adcy8	Adamts2	Adgrf2	Lama3	Gstm6
Adgrb1	Adgrb3	Adamtsl5	Adgrf4	Lpar1	Gstp2
Adgrg1	Adgrg6	Adck5	Adgrf5	Lrch1	Heyl
Adora2a	Adgrl2	Adgrb2	Adra1a	Lrfn2	Kmt2d
Adprh	Adgrl3	Adipor1	Agbl3	Lypd6b	Krtcap2
Adra2a	Adgrl4	Adipor2	Agmo	Lyzl4	Lhx8
Adra2c	Adk	Adprhl2	Agtpbp1	Maml2	Lrfn4
Adrbk1	Adss	Adra1d	Ahi1	Maml3	Lrrc56
Adrm1	Aff2	Adrb2	Aida	Manba	Lypd1
Adsl	Aff3	Aebp1	Aim2	Map2k6	Maea
Adssl1	Agbl1	Ahnak	Akap11	Masp1	Maged1
Aes	Agbl4	Aif1l	Akap5	Medag	Magee1
Agap2	Agfg1	Aifm2	Akap9	Mmd	Man2b2
Agap3	Agk	Ajuba	Alcam	Mob3b	Mcm5
Ago2	Ago3	Akip1	Aldh6a1	Mroh8	Mroh7
Agpat1	Agps	Akna	Alkbh8	Mterf1b	Ndst1
Agtrap	Ahr	Akr1a1	Amy1	Nck1	Nppc
Ahdc1	Aig1	Akt1s1	Angpt1	Ngf	Papln
Ahsa1	Ak5	Akt2	Ank3	Nmrk1	Pcnxl3
Aimp2	Akap10	Alas2	Ankef1	Nos1ap	Pcyox1l
Aip	Akap17b	Aldh16a1	Ankle2	Osbpl3	Plrg1
Ak1	Akap6	Aldh1a2	Ankrd11	Pappa2	Pm20d2
Akr7a5	Akap7	Aldoc	Ankrd12	Plb1	Ppan
Akt1	Akr1c14	Alkbh2	Ankrd49	Prkag2	Prdm16
Alad	Akt3	Alkbh4	Ano5	Purb	Prkch
Aldh1l1	Aldob	Alkbh5	Antxr2	R3hcc1l	Ptrhd1
Aldh2	Alg13	Als2cl	Aox4	Raver2	Pttg1ip
Aldoa	Alg6	Alx4	Ap1s3	Rere	RP23-103I12.10
Alg1	Alms1	Amacr	Ap3m1	RP23-214M22.3	RP23-298F22.4
Alkbh6	Alpk1	Amt	Ap5m1	RP23-354A20.1	Selplg
Alkbh7	Ammecr1	Angptl2	Aph1b	RP23-390C6.1	Serpina9
Alox5ap	Amn1	Angptl4	Apool	Sgms1	Slc35d3
Amdhd2	Amph	Ankrd13d	Arcn1	Siae	Slc6a1
Amfr	Anapc10	Ankrd39	Arglu1	Slc10a7	Slc6a11
Amotl1	Ank2	Ankrd6	Arhgap10	Slc19a3	Slc6a17
Amotl2	Ankhd1	Ankrd9	Arhgap11a	Slc25a24	Sp2
Ampd2	Ankib1	Ano8	Arhgap12	Slc35f3	Sppl2b
Amz1	Ankrd13c	Anxa11	Arhgap18	Smoc2	Srp68
Anapc11	Ankrd17	Ap1b1	Arhgap21	Sntb2	Syt3
Anapc2	Ankrd26	Apba3	Arhgap32	Snx24	Tab1
Angptl6	Ankrd28	Apold1	Arhgap6	Socs2	Tac1
Ankrd13b	Ankrd34c	Arap1	Arhgef9	Srrm4	Tbc1d9b
Ankrd35	Ankrd42	Arap3	Arid2	Stambpl1	Tex14
Ankrd37	Ankrd44	Arc	Arl6	Stim2	Tm2d3
Ankrd52	Anks1b	Arhgap23	Arl8b	Tbata	Toporsos
Ankrd54	Ano3	Arhgap28	Armc4	Tead1	Trem2
Ankrd63	Ano4	Arhgap4	Armc8	Teddm2	Trim45
Anxa2	Antxr1	Arhgef1	Arntl	Tifa	Trpc7
Aoc2	Ap3s1	Arhgef10l	Arpp19	Tmem178	Ubr4
Ap1m1	Apbb1ip	Arhgef17	Asb11	Trabd2b	Usp11
Ap1s1	Apbb2	Arhgef4	Asb3	Uvrag	Vat1l
Ap2a1	Apc	Arid3a	Asph	Wwox	Wdr6
Ap2a2	Apex2	Arl10	Aspn	Zbtb2	Zfp36
Ap2s1	Apoo	Armc7	Aste1	Zc3h7a	Zfp687
Ap4m1	Appl1	Arpc4	Asxl1	Zcchc6	Zfp784
Ap5b1	Ar	Arpc5	Atf6	Zdhhc14	Zfp956
Ap5z1	Arap2	Arrb1	Atg10	Zfand6
Apc2	Arfgef1	Arrb2	Atg3	Zfp366
Apeh	Arfgef3	Arrdc2	Atp10b	Zfp607
Aph1a	Arhgap15	Arsa	Atp11c	Zfp874b
Aplp1	Arhgap20	Arvcf	Atp2b1	Znrf3
Apoe	Arhgap29	Asb1	Atp5s
Arf3	Arhgap42	Asb2	Atp8a1
Arf5	Arhgap5	Asphd2	Atp8a2
Arf6	Arid4a	Atad3a	Atp9b
Arfgap2	Arid4b	Atg4b	Atrn
Arfip2	Arid5b	Atg4d	Atxn1
Arfrp1	Arih1	Atp13a1	B2m
Arhgap33	Arl13b	Atp1a2	B3galt2
Arhgap45	Arl15	Atp5b	B4galt6
Arhgdia	Arl4a	Atp5j2	Bank1
Arhgdig	Arl6ip6	Atp6v0a2	Bbs7
Arhgef19	Arnt	Atp6v0b	Bcap29
Arhgef37	Arntl2	Atp8b2	Bcas2
Arhgef40	Arpp21	Atxn7l3b	Birc6
Arid5a	arsb	Avpi1	Bmper
Arl2	Asah1	Axin2	Bmpr1a
Arl2bp	Asah2	Azin2	Bmpr1b
Arl4d	Asap1	B3galt4	Bms1
Armc5	Asb5	B3gat3	Bnip2
Arpc1a	Asb7	B430305J03Rik	Bod1l
Arpc1b	Ascc3	B4gat1	Brca2
Arx	Ash1l	Bach1	Brd7
Arxes1	Asic2	Bbs1	Btbd1
Asap3	Aspa	BC003965	Btbd10
Asb6	Astn1	Bcar1	Btg3
Asic4	Astn2	Bcl2l1	C1galt1
Asl	Asxl2	Bcl2l11	C7
Aspg	Asxl3	Bdh1	Cab39
Asphd1	Atad1	Bin1	Cacna1e
Atcay	Atad2	Bloc1s3	Cacnb2
Atf4	Atad2b	Bloc1s4	Camk2d
Atf5	Atad5	Bmp4	Camta1
Atf6b	Atf2	Bmp6	Cap2
Atg101	Atg4a	Bmp7	Capn6
Atg2a	Atg4c	Bod1	Casp12
Atg9b	Atm	Borcs6	Casp8ap2
Athl1	Atp11b	Btbd19	Casq2
Atox1	Atp13a5	Btg1	Cat
Atp13a2	Atp6v1d	C1qtnf4	Cav2
Atp1a3	Atp8b1	C2cd4c	Cbwd1
Atp2a3	Atr	Cacna1g	Ccar1
Atp5d	Atrnl1	Cacng5	Ccdc112
Atp5e	Atrx	Cacng8	Ccdc113
Atp5g2	Atxn7	Calb2	Ccdc122
Atp5g3	Avl9	Calm3	Ccdc138
Atp5k	B3galt1	Camk1	Ccdc148
Atp5l	B3glct	Camta2	Ccdc15
Atp5o	Bace2	Capg	Ccdc160
Atp6v1b2	Bach2	Capn10	Ccdc17
Atp6v1f	Bag4	Card10	Ccdc171
Atp6v1g1	Baz2b	Card9	Ccdc173
Atp9a	Bbof1	Carkd	Ccdc174
Aup1	Bbs9	Cbfa2t3	Ccdc18
Aurkaip1	Bbx	Cbln1	Ccdc186
AW011738	Bckdhb	Cbx2	Ccdc191
Axl	Bclaf1	Cbx6	Ccdc30
B9d2	Bdp1	Cbx7	Ccdc34
Bad	Bend6	Cbx8	Ccdc39
Bag6	Bicd1	Ccdc106	Ccdc47
Bahcc1	Bivm	Ccdc114	Ccdc62
Bahd1	Blm	Ccdc120	Ccdc66
Baiap2	Blzf1	Ccdc134	Ccdc80
Baiap3	Bmi1	Ccdc137	Ccdc82
Bambi	Bmp3	Ccdc166	Ccdc90b
Banf1	Bmpr2	Ccdc184	Ccnh
Bap1	Bora	Ccdc28b	Ccny
Bax	Braf	Ccdc74a	Ccser2
Bcam	Brcc3	Ccdc8	Cd46
Bcan	Brdt	Ccdc88b	Cd84
Bcat2	Bre	Ccnd2	Cdc37l1
Bckdha	Brinp1	Cct4	Cdc40
Bcl9l	Brinp3	Cd109	Cdh19
Bcr	Brwd3	Cd163	Cdh7
Begain	Btbd7	Cd164l2	Cdh8
Bex1	Btbd8	Cd2bp2	Cdk17
Bfsp2	Btf3l4	Cd300d	Cdk6
Blcap	CAAA01180111.1	Cd63	Cdkl2
Bloc1s1	Caap1	Cd74	Cdkl3
Bloc1s2	Cab39l	Cdh24	Cdon
Blvrb	Cacna1d	Cdk20	Ceacam1
Bmf	Cacna2d1	Cdk2ap1	Cenpc1
Bmyc	Cacnb4	Cdk4	Cenpe
Bola1	Cacng3	Cdk9	Cenpk
Bola2	Cadm1	Cebpa	Cenpp
Bop1	Cadm2	Cebpd	Cenpq
Brf1	Cadps	Cebpzos	Cep112
Brf2	Cadps2	Cecr6	Cep128
Brms1	Cage1	Cep104	Cep290
Brsk1	Calcrl	Cers1	Cep44
Bscl2	Camk1d	Cers2	Cep57
Bsg	Camk4	Cfap100	Cept1
Btbd17	Camkmt	Cfl1	Cers4
Btbd2	Camsap2	Chchd1	Cetn4
Btg2	Capn7	Chchd4	Cfap206
Bysl	Caprin2	Chmp4b	Cfap36
C1qc	Capza2	Chrd	Cfap54
C1ql1	Car10	Chrnb2	Cfap70
C1qtnf1	Car5b	Chst3	Cfap97
C2cd2l	Car8	Churc1	Cfdp1
C4b	Carf	Ciapin1	Cftr
Cabp7	Carnmt1	Cib2	CH25-588N10.2
Cacfd1	Casc4	Cisd1	Chchd3
Cacna1h	Cask	Cish	Chordc1
Cacnb1	Casp3	Cited4	Ckap5
Cacng7	Cast	Ckap4	Clcn4
Cactin	Catsper2	Clasrp	Clec5a
Cad	Cbfb	Clcn7	Clgn
Cadm4	Cblb	Cldn5	Clint1
Calr	Cbll1	Cln6	Clip1
Caly	Cc2d2a	Cln8	Clmp
Camk1g	Ccbe1	Clptm1	Cmc4
Camk2b	Ccdc129	Clta	Cml3
Camk2n2	Ccdc141	Cltb	Cmpk1
Camkk1	Ccdc50	Clu	Cnbd2
Camkv	Ccdc79	Cluh	Cnbp
Cant1	Ccdc85a	Cmc2	Cnot11
Capn15	Ccdc88a	Cmklr1	Cnot6
Capns1	Ccnc	Cml1	Cntln
Car11	Ccne2	Cmtm6	Cntnap3
Car12	Ccng1	Cmtm7	Cntnap4
Carhsp1	Ccnyl1	Cntn2	Cntnap5b
Carmil3	Ccser1	Col13a1	Cntnap5c
Cars2	Cd180	Col18a1	Col11a1
Cartpt	Cd200r1	Col1a1	Col14a1
Caskin1	Cd2ap	Col23a1	Copg2
Caskin2	Cd34	Col3a1	Cox20
Casz1	Cdc27	Col4a6	Cpeb3
Cbarp	Cdc42bpa	Col5a2	Cpne3
Cbln4	Cdc73	Col6a3	Cpped1
Cbr1	Cdh10	Col7a1	Cpq
Cbr3	Cdh11	Commd9	Cr1l
Cbs	Cdh12	Coprs	Cracr2a
Cbx4	Cdh18	Coq10a	Crebrf
Cc2d1a	Cdh2	Coq4	Csde1
Ccar2	Cdh20	Coq6	Cstf2
Ccbl1	Cdh6	Coq7	Ctbs
Ccdc107	Cdh9	Cox14	Ctnnal1
Ccdc12	Cdk12	Cox19	Cul2
Ccdc124	Cdk13	Cox5a	Cul4b
Ccdc13	Cdk14	Cox6a1	Cwc15
Ccdc51	Cdk8	Cox6a2	Cxxc4
Ccdc61	Cdkal1	Cox7a1	Cyp2j12
Ccdc71	Cdkl5	Cox7b	D3Ertd751e
Ccdc85c	Cdkn2aip	Cox8a	Daam1
Ccdc9	Cdyl	Cplx1	Dab1
Ccdc94	Cecr2	Cpt2	Dach1
Ccdc97	Celf2	Cpxm1	Dach2
Ccm2	Cep126	Crb2	Dazl
Ccnb1	Cep162	Crlf2	Dcaf17
Ccnd1	Cep170	Crtac1	Dcbld2
Ccnd3	Cep192	Crtap	Dcc
Ccnf	Cep295	Crtc1	Dcdc2a
Cct7	Cep350	Cst6	Dcun1d5
Cd151	Cep57l1	Ctgf	Ddx1
Cd81	Cep70	Ctsb	Ddx3x
Cd82	Cep78	Ctsh	Ddx46
Cdc34	Cep83	Ctu1	Dek
Cdc37	Cep85l	Ctxn3	Denr
Cdc42bpg	Cerkl	Cuedc2	Dgkb
Cdc42ep1	Cers6	Cuta	Dhfr
Cdc42ep4	Cetn3	Cxxc5	Dhx15
Cdh22	Cfap69	Cyb561d1	Dhx36
Cdh23	Cggbp1	Cyc1	Dip2c
Cdipt	Chd1	Cyp1b1	Dkc1
Cdk2ap2	Chd2	Cyp26b1	Dkk2
Cdk5r1	Chd6	Cyp27a1	Dld
Cdkn1a	Chd9	Cyp4f15	Dmtf1
Cdkn2d	CHDC2	Cys1	Dmxl2
Cds2	Chic1	Dact1	Dnah14
Celsr1	Chic2	Dact3	Dnah5
Cenpt	Chl1	Dbndd1	Dnah7b
Cep170b	Chm	Dbp	Dnah7c
Chac1	Chpt1	Dcaf12	Dnajb4
Chadl	Chrdl1	Dcaf15	Dnajb9
Chat	Chrm2	Dcakd	Dnajc2
Chd3	Chrm3	Dcdc2b	Dnajc21
Cherp	Chrna7	Dctn3	Dnajc8
Chmp1a	Chsy3	Ddah2	Dnttip2
Chmp6	Cir1	Ddx18	Dock10
Chpf	Clcn1	Ddx28	Dock2
Chst1	Cldn34c1	Ddx47	Dok6
Chst12	Clk1	Ddx56	Dph6
Chtf8	Clk4	Dedd2	Dpp8
Cib1	Clock	Def6	Dpy19l1
Cic	Clstn2	Dennd2a	Dpy19l4
Cited2	Clvs1	Dennd4b	Dpyd
Ckb	Clvs2	Derl1	Dram1
Cldn11	Clybl	Des	Drp2
Clic1	Cmss1	Dexi	Dst
Clip2	Cnep1r1	Dgcr6	Dtd1
Clpp	Cnksr2	Dhps	Dusp16
Clstn3	Cnot2	Dhrs7b	Dync1i2
Cmbl	Cnot4	Dhx16	Dync2h1
Cnih2	Cnot6l	Dlgap3	Dzip1
Cnn2	Cnrip1	Dnajb1	Eaf2
Cnnm3	Cntn1	Dnajb5	Ednrb
Cnp	Cntn3	Dnajc30	Eea1
Cnppd1	Cntn4	Dnase1l2	Efcab1
Cnpy3	Cntn5	Dnase1l3	Efcab5
Cntfr	Cntn6	Dok7	Efcab7
Coa4	Cntnap2	Dolk	Efhc2
Coasy	Cntnap5a	Dolpp1	Efl1
Col1a2	Cntrl	Dpf2	Egfem1
Col20a1	Cobl	Dph2	Egfr
Col6a2	Cobll1	Dpm2	Eif2ak2
Col9a2	Cog5	Dpp7	Eif2s2
Commd1	Col19a1	Dtx2	Eif3a
Commd4	Col24a1	Dtymk	Eif3j1
Commd7	Col4a3bp	Dusp1	Eif4e
Comt	Commd10	Dusp28	Eif5
Comtd1	Cops2	Dusp5	Eif5a2
Cope	Cox6c	Dynlt1c	Eif5b
Cops9	Cpeb1	Dyrk3	Elmo1
Cort	Cpeb2	Ebp	Elmod1
Cotl1	Cpeb4	Ebpl	Enah
Cox17	Cpne4	Edem2	Enox2
Cox5b	Cpne8	Eef1akmt1	Enpp6
Cpne5	Cpne9	Eef1d	Eny2
Cpsf1	Cpsf6	Efemp2	Eogt
Cpt1c	Creb1	Efhd2	Epb41l5
Creld1	Creb5	Efna1	Epc2
Creld2	Crispld1	Efna3	Epha4
Crh	Crls1	Efnb1	Epm2a
Crip1	Csgalnact1	Egln3	Erap1
Crip2	Csgalnact2	Egr4	Ercc6l2
Crocc	Csmd1	Ehd3	Erg
Crybb1	Csmd3	Eid2b	Eri2
Crym	Csnk1g1	Eif3g	Erich3
Csdc2	Csnk1g3	Eif5a	Erlec1
Csf2ra	Cspp1	Eif6	Erlin1
Csk	Csrnp3	Elmsan1	Ermn
Csnk1d	Cstf3	Elovl1	Esf1
Csnk1g2	Ctdspl2	Elp5	Exoc2
Cspg4	Ctnna2	Eme2	Exoc3
Csrp2	Ctnna3	Emilin1	Fam133b
Cst3	Ctnnd2	Emp3	Fam149b
Cstb	Cttnbp2	Endou	Fam161b
Ctbp1	Cul1	Engase	Fam175a
Ctdsp1	Cul3	Entpd2	Fam179b
Ctdsp2	Cul5	Ephb3	Fam184b
Ctnnb1	Cux1	Epop	Fam228a
Ctxn2	Cwc22	Erbb2	Fam228b
Cwf19l1	Cwc27	Ercc1	Fam229b
Cx3cl1	Cwf19l2	Ercc2	Fam45a
Cxcl14	Cwh43	Erf	Fam49a
Cxx1c	Cyb5r4	Erh	Fam76b
Cxxc1	Cyp2j6	Esyt1	Fam81a
Cyb561	Cyp2r1	Ethe1	Fam92a
Cyb561d2	Cyp39a1	Eva1a	Fam98b
Cyb5r1	Cyp4x1	Eva1c	Fancl
Cyba	Cyp7b1	Exoc7	Fbxl4
Cygb	Cyyr1	Exog	Fbxl5
Cyhr1	Dcaf10	Exosc2	Fbxo33
Cyp2d22	Dcaf13	Eya2	Fbxo34
Cyp46a1	Dcaf6	F13a1	Fbxo36
Cyth4	Dcdc2c	Fam109a	Fbxo47
D2Wsu81e	Dclre1a	Fam117a	Fem1c
Dalrd3	Dclre1c	Fam129c	Fgf10
Dapk3	Dcun1d1	Fam131a	Fhad1
Daxx	Dcx	Fam163b	Filip1
Dazap1	Ddhd1	Fam171a2	Fip1l1
Dbi	Ddx10	Fam174b	Fkbp3
Dbn1	Ddx26b	Fam207a	Flrt3
Dbnl	Ddx3y	Fam213b	Fnbp1l
Dchs1	Ddx4	Fam214b	Focad
Dctn1	Ddx50	Fam216a	Folh1
Dctpp1	Dennd1a	Fam219b	Foxj3
Dcxr	Dennd1b	Fam32a	Foxn2
Dda1	Dennd4a	Fam43a	Foxp1
Ddit4	Dennd4c	Fam43b	Foxp2
Ddn	Dennd5b	Fam46c	Foxq1
Ddost	Dennd6a	Fam53a	Fras1
Ddr1	Desi2	Fam69b	Frrs1l
Ddx39	Dgkh	Fam78a	Fstl5
Ddx39b	Dgki	Fam83d	Fzd3
Ddx41	Diaph2	Fam83h	G2e3
Ddx49	Diaph3	Fam98c	Gab2
Ddx54	Dis3	Fbln5	Gab3
Dedd	Dis3l2	Fbln7	Gabra2
Dffa	Dlc1	Fbxl19	Gabra5
Dgat2	Dlg1	Fbxo2	Galnt13
Dhrs13	Dlg2	Fbxo41	Garem1
Dhrs4	Dlgap1	Fbxo6	Gas2l3
Dhx34	Dlgap2	Fbxw8	Gbp7
Dhx37	Dmd	Fcrls	Gca
Diablo	Dmxl1	Fdxr	Gcc2
Diras1	Dnajb14	Fgd5	Gcfc2
Dlg4	Dnajc1	Fgfbp1	Gclc
Dlgap4	Dnajc13	Fgfr3	Gclm
Dlk2	Dnajc24	Fgl2	Gda
Dll1	Dnm1l	Fibin	Gemin8
Dll4	Dnm3	Fjx1	Gfpt2
Dlx6	Dock3	Flna	Ghr
Dmap1	Dock4	Flnc	Gin1
Dmkn	Dock7	Flot1	Gkap1
Dmpk	Dopey1	Flywch1	Glra2
Dmwd	Dpp10	Fn1	Glra3
Dnaic2	Dram2	Fndc4	Gm10130
Dnajb2	Dscam	Foxf2	Gm16503
Dnal4	Dtna	Fut11	Gm20939
Dnase2a	Dtwd2	Fv1	Gm9938
Dnlz	Dync1i1	Fxn	Gnai1
Dnpep	Dynlt3	Fzd7	Gnaq
Doc2b	Dzip3	Fzd9	Gnl2
Dock6	Ebag9	Gabarapl1	Gnpnat1
Dok3	Ebf1	Gadd45a	Golga4
Dok4	Echdc1	Gadd45b	Golga5
Dpagt1	Eda	Gal3st1	Golgb1
Dpf1	Edem3	Gale	Golim4
Dpm3	Edil3	Galnt15	Gorab
Dpp3	Efcab2	Ganab	Gpalpp1
Dpp9	Efna5	Gata2	Gpbp1
Dpysl5	Efr3a	Gatsl3	Gpc4
Drap1	Ehbp1	Gbgt1	Gpr137c
Drd	Eid1	Gemin7	Gpr155
Dtx1	Eif2a	Gfer	Gpr22
Dus1l	Eif2s3y	Gga2	Gprin3
Dus3l	Eif3e	Ggcx	Grb10
Dusp4	Eif4g3	Gipc1	Grem2
Dusp8	Elavl2	Gipr	Grid1
Dvl1	Elavl4	Glis2	Grid2
Dvl2	Ell2	Glmp	Grik2
Dxo	Elovl6	Glul	Grin3a
Dynll2	Elovl7	Gmip	Grk4
Dyrk1b	Elp4	Gmpr	Grm5
E4f1	Emb	Gna12	Grsf1
Ecel1	Emc2	Gng11	Gstcd
Ech1	Emcn	Golga7b	Gstz1
Echdc2	Eml4	Gpank1	Gtpbp4
Ecm1	Eml5	Gpat4	Gucy1a2
Edc4	Eml6	Gpatch3	Gucy1a3
Edf1	Enox1	Gper1	Gucy1b3
Eef1b2	Enpp2	Gpn2	Guf1
Eef2	Epb41	Gpr107	Gvin1
Efnb3	Epb41l2	Gpr150	Hacd1
Efs	Epb41l3	Gpr161	Hapln1
Egfl7	Epha3	Gpr17	Haus6
Egln2	Epha5	Gpr3	Hcrtr2
Egr3	Epha6	Gpr37l1	Hdac2
Ehbp1l1	Epha7	Gpr62	Hfm1
Ehd1	Eps15	Gpr68	Hibch
Ehd2	Eqtn	Gps1	Hif1a
Ehmt2	Erbb2ip	Gpsm1	Hipk2
Eif1ad	Erbb4	Gpt	Hltf
Eif2b2	Erc1	Gpt2	Hmgb1
Eif2b4	Erc2	Gpx1	Hmgcs1
Eif3b	Ergic2	Gramd4	Hnrnpdl
Eif3f	Erich1	Grap	Hnrnpr
Eif3i	Erich6	Grcc10	Hnrnpu
Eif3k	Ero1lb	Grid2ip	Hpgd
Eif3l	Erp44	Gsdmd	Hpgds
Eif4a3	Esco1	Gstm2	Hrh2
Eif4ebp2	Esrrg	Gstm4	Hs3st1
Eif4h	Esyt2	Gstt2	Hs3st5
Elfn1	Etfa	Gtf2h4	Hs6st2
Elfn2	Etl4	Gtf3c5	Hsf2
Eln	Etohi1	Gucd1	Hspa4l
Elob	Etv1	Gxylt2	Hspb11
Elp6	Etv6	Gypc	Hspb6
Emc10	Evi5	H13	Htatsf1
Emc9	Exoc4	H2-Aa	Htr1a
Emg1	Exoc5	H2-Ab1	Htr2a
Eml2	Exoc6	H2-DMa	Htr2c
Eml3	Exoc6b	H2-Eb1	Hunk
Emp2	Exph5	H2-Q4	Hykk
Enc1	Ext1	H2-T22	Hyls1
Endog	Eya4	H2afx	Ica1l
Enkd1	F8	H2afy	Idi1
Eno1	Faf1	H2afy2	Ifit1bl1
Eno2	Fam103a1	H2afz	Ift74
Entpd6	Fam120c	Hagh	Ift80
Epha2	Fam135a	Haghl	Igbp1
Ephb4	Fam135b	Hbb-bs	Igf2bp2
Epn1	Fam13a	Hbegf	Ikzf2
Ergic3	Fam13c	Hcn4	Il15
Erp29	Fam155a	Hcrtr1	Il18
Esrra	Fam169a	Hebp1	Il20rb
Etv3	Fam171b	Hes1	Il33
Evc	Fam172a	Hexa	Ing2
Exoc8	Fam185a	Hey1	Ints13
Exosc4	Fam188a	Hic1	Invs
Exosc5	Fam189a1	Higd1a	Ipo11
F8a	Fam193a	Hilpda	Irak1bp1
Faap100	Fam196a	Hint1	Ireb2
Faap20	Fam198b	Hint2	Ispd
Fadd	Fam199x	Hist1h1b	Itch
Fads6	Fam19a1	Hist1h2ak	Itgb3bp
Fahd2a	Fam19a2	Hist1h2bf	Iws1
Faim2	Fam204a	Hist1h2bg	Jam2
Fam110a	Fam208a	Hist1h3d	Jrkl
Fam129b	Fam208b	Hist1h3i	Kat6b
Fam134a	Fam35a	Hist1h4b	Kbtbd3
Fam160b2	Fam49b	Hist1h4j	Kbtbd8
Fam179a	Fam63b	Hist1h4m	Kcna4
Fam189b	Fam69a	Hist1h4n	Kcnab1
Fam195b	Fam78b	Hk2	Kcnd2
Fam198a	Fancm	Hk3	Kcnh1
Fam20c	Fap	Hmbs	Kcnh8
Fam222a	Far1	Hnrnpa0	Kcnk10
Fam234a	Far2	Hpca	Kctd8
Fam234b	Farp2	Hr	Kdm4d
Fam53c	Fars2	Hs3st3b1	Kdm5d
Fam57b	Fat3	Hs6st1	Kif18a
Fam58b	Fat4	Hspbp1	Kif21a
Fam63a	Fbxl17	Htra2	Kif24
Fam69c	Fbxo11	Hvcn1	Kif3a
Fam96b	Fbxo16	Hyal1	Kif5c
Fance	Fbxo8	Iah1	Kiz
Fancf	Fbxw2	Icam1	Klf6
Farsa	Fbxw7	Icam5	Klhl1
Fasn	Fcho2	Icosl	Klhl14
Fau	Fchsd2	Idh2	Klhl20
Fbf1	Fer	Ier5	Klhl28
Fbl	Fgd4	Ier5l	Klhl4
Fbll1	Fgf12	Iffo1	Krcc1
Fbln1	Fgf13	Iffo2	L3mbtl4
Fbln2	Fgf14	Ifi27	Lacc1
Fbxl14	Fgf5	Ifitm1	Lactb
Fbxl18	Fgf9	Ifitm10	Lama2
Fbxl6	Fgfr1op2	Ifrd2	Larp7
Fbxo10	Fggy	Ift122	Lca5
Fbxo21	Fhit	Ift27	Lcp1
Fbxo31	Fhod3	Igfbp2	Letm2
Fbxo46	Figf	Igfbp6	Lgi2
Fbxw9	Fign	Igsf21	Lhfpl3
Fcgrt	Filip1l	Ikbke	Lin7c
Fcor	Fli1	Il11ra1	Lin9
Fem1a	Flrt2	Il17rd	Lipo1
Fen1	Fmn1	Il34	Lmbrd1
Fermt3	Fmn2	Inafm1	Lmbrd2
Fes	Fmnl2	Inhbb	Lmntd1
Fgf22	Fmr1	Ino80e	Lmo3
Fgfr1	Fnbp4	Inppl1	Lmo7
Fgfrl1	Fndc3a	Insm1	Lpar6
Fhod1	Fnip1	Irak4	Lpxn
Fibcd1	Frem1	Irf1	Lrguk
Fibp	Frmd3	Irf2bp1	Lrmda
Ficd	Frmd4a	Irf2bpl	Lrrc55
Fis1	Frmd4b	Irf7	Lrrcc1
Fitm2	Frmd5	Irgq	Lrriq1
Fiz1	Frmpd4	Isoc2a	Lrriq3
Fkbp10	Fsd1l	Isoc2b	Lrrn1
Fkbp4	Fstl4	Itga10	Lrrn3
Fkbp5	Fubp1	Itga2b	Ltbp1
Fkbp8	Fut8	Itga7	Luc7l3
Flcn	Fut9	Itgb2	Lurap1l
Flii	Fxr1	Itpa	Luzp1
Flrt1	Gabbr2	Itpk1	Lyplal1
Flt4	Gabra1	Itpkc	Lyrm1
Fmnl1	Gabra3	Itpripl2	Lztfl1
Fndc9	Gabra4	Jmjd6	Macf1
Fosb	Gabrb1	Junb	Mak16
Fosl2	Gabrb2	Kansl2	Malsu1
Foxg1	Gabrb3	Kansl3	Man1a
Foxj1	Gabrg2	Kat2a	Maob
Foxo4	Gabrg3	Kat8	Map1b
Foxo6	Galnt1	Kcnc1	Map2
Foxp4	Galnt14	Kcnc3	Map2k4
Fpgs	Galnt3	Kcnh3	Map2k5
Frat1	Galnt7	Kcnip2	Map3k15
Frmd8	Galntl6	Kcnk3	Map3k21
Frs3	Garnl3	Kcnq2	Map4
Fscn1	Gas2	Kctd17	Map9
Fth1	Gbe1	Kctd2	Mapk1ip1l
Ftl1	Gcnt4	Kctd20	March1
Ftsj2	Gdap1	Kdelr1	March10
Fuca1	Ggps1	Kdelr2	Mars2
Fuom	Gigyf2	Kdm4b	Matr3
Furin	Gk	Kif22	Mbip
Fuz	Glmn	Kifc5b	Mbnl2
Fxyd1	Glrb	Kiss1r	Mboat1
Fxyd6	Gls	Klc1	Mbtps2
Fzd1	Gm10118	Klc2	Mcf2
Fzd2	Gm16485	Klf4	Mcm8
Fzd5	Gmds	Klhdc8b	Mcm9
Fzd8	Gng12	Klhl25	Mctp1
Fzr1	Gng2	Kmt2b	Mctp2
G0s2	Gnpda2	Knstrn	Mdh1b
Gaa	Gopc	Kremen1	Med14
Gabarapl2	Gpatch8	Krt77	Mef2a
Gad1	Gpc5	Lama1	Mei4
Gadd45g	Gpc6	Laptm4b	Meig1
Gadd45gip1	Gpcpd1	Ldha	Melk
Galk1	Gphn	Ldlrap1	Mettl24
Galnt9	Gpm6a	Leng9	Mettl25
Gamt	Gpm6b	Leprotl1	Mettl8
Gareml	Gpr158	Lgals1	Mfsd4
Gart	Gpr34	Lgi4	Mfsd6
Gas2l1	Gpr45	Lin37	Mfsd7b
Gatsl2	Gprasp1	Lingo1	Mgat4c
Gcn1l1	Grb14	Lipe	Mia3
Gcsh	Greb1l	Lix1l	Mid2
Gdap1l1	Gria2	Loxl1	Mipol1
Gdf10	Gria3	Loxl3	Mllt11
Gdpd5	Gria4	Lrig1	Mmachc
Get4	Grik1	Lrp4	Mme
Gfap	Grin2a	Lrrc59	Mms22l
Gga1	Grin2b	Lrrc73	Mndal
Ggt5	Grip1	Lrrk1	Morc4
Gigyf1	Grm1	Lrsam1	Mospd1
Git1	Grm3	Lsr	Mphosph10
Gja4	Grm7	Ltbr	Mphosph8
Gjb1	Grm8	Ly6c1	Mplkip
Gjc2	Gsk3b	Lzic	Mpp5
Glipr2	Gtdc1	Lztr1	Mr1
Glrx5	Gtf2h1	Lzts2	Mrpl32
Gltscr2	Gtpbp8	Mad2l1bp	Msh3
Glyctk	Hace1	Mad2l2	Msl2
Gm10073	Hcn1	Map1lc3a	Msl3
Gm8186	Hdac8	Map2k1	Msmo1
Gm996	Hdac9	Map2k3	Mss51
Gmppb	Hdgfrp3	Map3k11	mt-Atp8
Gna11	Hdx	Map3k14	mt-Co1
Gnai2	Hectd2	Mapk11	mt-Nd1
Gnb2l1	Hecw1	Mapkapk3	mt-Nd5
Gnb5	Hecw2	Mark4	Mta3
Gng7	Hells	Matn2	Mterf1a
Gnl1	Herc1	Mcat	Mthfd2l
Gp1bb	Herc3	Mcm7	Mthfs
Gpc1	Herc4	Mcrs1	Mtif2
Gpd1	Herc6	Med18	Mtus2
Gpr101	Herpud2	Med9	Mut
Gpr108	Hgf	Mef2d	Myh10
Gpr137	Hivep2	Meis3	Myh3
Gpr146	Hmcn1	Metrn	Myo5a
Gpr162	Hmgcll1	Metrnl	Myo6
Gpr27	Hmgn3	Mettl17	Myom3
Gpr6	Hnmt	Mfap2	Mysm1
Gprc5c	Hnrnph2	Mfsd3	Nab1
Gprin1	Hook1	Mgat5b	Naf1
Gprin2	Hook3	Mgme1	Nalcn
Grasp	Hs2st1	Mgp	Nap1l1
Grhpr	Hs3st2	Mical2	Nasp
Grin2c	Hs3st4	Mid1ip1	Nbas
Grina	Hs6st3	Midn	Nbn
Grk6	Hsf5	Mmp2	Ncapd3
Grm4	Htr1f	Mmp24	Nckap1
Grn	Ica1	Mmp28	Ndst4
Grpel1	Ice2	Mocs3	Ndufaf4
Grtp1	Ifih1	Mogs	Nedd4
Grwd1	Ifit1bl2	Mpp4	Nek10
Gsn	Ifit2	Mpzl2	Nell2
Gstm7	Ift57	Mrgpre	Nemf
Gstp1	Ift81	Mrm1	Neto2
Gtf3a	Ift88	Mrm3	Neu2
Gtpbp1	Igfbp7	Mrpl10	Neurod6
Gtpbp2	Igfn1	Mrpl19	Nexn
Gtpbp6	Igip	Mrpl36	Nf1
Guk1	Ikzf1	Mrpl43	Nfe2l3
H1fx	Il1rap	Mrpl44	Nfyb
H2-D1	Il1rapl1	Mrpl57	Nifk
H2-K1	Il1rapl2	Mrps10	Nipal2
H2-T23	Immp1l	Mrps11	Nkain2
H2afj	Immp2l	Mrps26	Nkain3
H2afv	Impad1	Mrps34	Nkap
Hadh	Ino80	Mrps36	Nkiras1
Hap1	Inpp4b	Mrps6	Nlrp1b
Hapln2	Ints6	Mrvi1	Nol7
Has3	Ints8	Ms4a6b	Nol8
Haus8	Ipcef1	Msi1	Nox1
Hax1	Iqcb1	Mta1	Npas2
Hba-a1	Iqgap2	Mta2	Nphp3
Hba-a2	Irf2	Mtfp1	Npr3
Hbb-bt	Ism1	Mtfr1l	Npsr1
Hcn2	Itfg1	Mtg2	Nptn
Hcn3	Itga1	Mthfd2	Npy1r
Hdac11	Itga4	Mthfsd	Nr2f1
Hdac5	Itga8	Mtss1l	Nr3c2
Hdgfrp2	Itgav	Mtx1	Nrd1
Hes6	Itgb1	Mum1	Nrep
Hexim1	Itgb8	Musk	Nrg4
Hgh1	Itsn2	Mutyh	Nrip1
Hgs	Jade3	Mvb12a	Nsmaf
Hif1an	Jak2	Mxd1	Nsrp1
Hif3a	Jakmip2	Mxra7	Nsun6
Hip1r	Jazf1	Mycn	Nsun7
Hist1h2bb	Jmjd1c	Myo1c	Ntrk2
Hist1h2bc	Jph1	Myo1h	Nubpl
Hist1h2be	Kalrn	N4bp3	Nucb2
Hist1h4a	Kansl1	Naaa	Nudcd1
Hist1h4d	Kansl1l	Nab2	Nufip2
Hist1h4f	Kat2b	Nacc2	Nup153
Hist1h4h	Kat6a	Nadk	Nup98
Hist1h4i	Katnbl1	Naglu	Nxpe3
Hist2h4	Kcnb2	Nat8l	Nxph2
Hmg20b	Kcnc2	Nat9	Nxt2
Hmga1	Kcnh5	Ncf1	Oacyl
Hmgcl	Kcnh7	Ndrg4	Odf2l
Hmgn1	Kcnip4	Ndufa7	Ogfrl1
Homer3	Kcnj3	Ndufa9	Olfm3
Hopx	Kcnj6	Ndufab1	Olfml1
Hpcal1	Kcnma1	Ndufb5	Olfr690
Hpcal4	Kcnmb2	Ndufs2	Onecut2
Hps4	Kcnn2	Ndufs3	Optn
Hras	Kcnq3	Necap2	Orc5
Hrh3	Kcnq5	Nek8	Osbpl1a
Hrk	Kcnt2	Nelfb	Osbpl8
Hsd17b10	Kcnv1	Neurl1b	Osgepl1
Hsdl1	Kctd12b	Nfic	Otud4
Hsf4	Kctd16	Nfil3	Otud6b
Hspa12b	Kdelc2	Nfkb2	Ovgp1
Hspa1a	Kdm4c	Nfkbid	P2ry12
Hspa1b	Kdm6a	Nfs1	Pabpc5
Hspa5	Kdm7a	Ngef	Pabpn1
Hspb1	Khdrbs2	Nid1	Pacrg
Hspb8	Khdrbs3	Nkd2	Paip1
Hspe1	Kif16b	Nmb	Pakap
Hspg2	Kif2a	Nmral1	Palm2
Htr1b	Klf12	Notum	Pam
Htr6	Klf7	Npr1	Pank1
Htra3	Klf8	Nptx1	Parm1
Hyal2	Klhl15	Nr1h3	Parpbp
Hyou1	Klhl23	Nr4a1	Pate2
Iba57	Klhl32	Nrarp	Pcdh10
Icmt	Klhl6	Nrip2	Pcdh11x
Id1	Kmt2c	Nt5m	Pcdh15
Id3	Kmt2e	Nubp1	Pcmtd2
Idua	Kpna3	Nudt3	Pcsk1
Ier3	Kpna4	Nup85	Pcsk5
Ier3ip1	Kras	Oaz2	Pde11a
Ifi35	Krit1	Olfml2a	Pde6h
Ifitm3	Krt222	Opa3	Pde7b
Igfbp4	Ktn1	Oprd1	Pdik1l
Ighmbp2	Lactb2	Orai2	Pdk3
Igsf3	Lair1	Orai3	Pds5b
Igsf8	Lama4	Osgep	Pdzd8
Igsf9	Lamp2	Osr1	Peak1
Il17rc	Large	Otub2	Peg3
Imp3	Larp1b	P2ry6	Pex7
Impdh1	Larp4	P3h1	Pgap1
Impdh2	Lclat1	P4ha2	Phactr1
Inf2	Lcor	P4hb	Phf8
Inha	Lcorl	Pacsin1	Phlpp1
Ino80b	Ldb2	Padi2	Pigl
Inpp5j	Ldlrad3	Pafah2	Pigu
Ints1	Ldlrad4	Pald1	Pikfyve
Ints11	Lef1	Paqr5	Pitrm1
Ints5	Lekr1	Paqr6	Pja2
Ipo13	Lgi1	Paqr7	Pkdrej
Ipo4	Lgr4	Paqr8	Pkhd1l1
Irf3	Lhfp	Parp10	Pkia
Irf5	Limch1	Pcbp4	Plcxd3
Irs2	Lims1	Pcgf1	Plek
Isl1	Lin28b	Pcolce	Plekha5
Islr	Lin52	Pctp	Plekhg1
Isoc1	Lin54	Pdcd2l	Plekhm3
Isyna1	Lin7a	Pdgfb	Plgrkt
Itfg2	Lingo2	Pdgfrb	Plp1
Itga11	Lix1	Pdlim7	Plppr1
Itga5	Lmbr1	Pdxp	Plppr4
Itgb4	Lnpep	Pdzd7	Plscr4
Itgb5	Lnpk	Pelp1	Pmaip1
Itm2c	Lpcat2	Pepd	Pms1
Itpkb	Lpgat1	Per1	Pms2
Itpr3	Lpp	Per2	Pnisr
Itpripl1	Lrba	Pes1	Pnrc1
Ivd	Lrch2	Pfkm	Polb
Jade2	Lrfn5	Pgam1	Poli
Jag2	Lrif1	Pgam2	Poln
Jagn1	Lrp1b	Pgd	Polq
Jak3	Lrp6	Pgf	Polr3g
Josd2	Lrrc16a	Pgk1	Pop4
Jph4	Lrrc3b	Pgs1	Pot1a
Jrk	Lrrc4	Phb2	Pot1b
Jsrp1	Lrrc40	Phf1	Pou6f2
Jun	Lrrc49	Phf2	Ppargc1a
Jund	Lrrc4c	Phf5a	Ppid
Jup	Lrrc6	Phlda3	Ppig
Kank2	Lrrc7	Phpt1	Ppm1l
Kank3	Lrrc8b	Pigyl	Ppp1r9a
Katnb1	Lrrc8c	Pik3c2b	Ppp2r2a
Kazn	Lrrfip2	Pink1	Ppp2r5e
Kbtbd11	Lrrtm2	Pip4k2c	Prcp
Kbtbd4	Lrrtm3	Pip5k1c	Prdm10
Kcna3	Lrrtm4	Pithd1	Primpol
Kcna5	Lsamp	Pla2g5	Prkaa1
Kcnf1	Lsmem1	Plcd3	Prkcb
Kcng1	Luc7l2	Plch2	Prkci
Kcnh2	Luzp2	Pld2	Prn
Kcnj12	Ly86	Plekha4	Prox1
Kcnn1	Ly96	Plekhg2	Prpf4b
Kctd10	Lypd6	Plekhh3	Prr16
Kctd13	Macrod2	Plod3	Prrc2c
Kctd15	Magi1	Plpp7	Psd3
Kdm4a	Magi2	Pnkp	Psip1
Kdm6b	Magi3	Podn	Pstpip2
Keap1	Mal2	Podxl2	Ptchd1
Khsrp	Malt1	Pofut2	Pter
Kif17	Mamdc2	Poldip2	Pth2r
Kif19a	Mamld1	Polg	Ptprc
Kif1c	Mampt	Polr1b	Ptprj
Kif26a	Man1a2	Polr2g	Ptprn2
Kif7	Man2a1	Polr2h	Ptprz1
Kifc3	Manea	Polr3d	Pum2
Kirrel	Mansc1	Polr3h	Pus10
Klc4	Maoa	Pou6f1	Pus3
Klf13	Map3k2	Ppard	Qrfpr
Klf15	Map3k3	Ppcs	Qrich1
Klf2	Map3k5	Ppic	Rab10
Klhdc3	Map3k7	Ppm1f	Rab11fip2
Klhdc7a	Map4k3	Ppp1r14b	Rab39b
Klhl21	Map4k5	Ppp1r16a	Rab5a
Klhl26	Map7	Ppp1r16b	Rabep1
Klhl36	Map7d2	Ppp1r35	Rad18
Kptn	Mapk10	Ppp1r3g	Rad50
Lamb1	Mapk8	Ppp1r9b	Rad52
Lamb2	Mapk9	Ppp2r1a	Rai14
Lamb3	March11	Ppp2r5b	Rai2
Lamc3	March7	Ppp3r1	Ralgapb
Lamtor1	Mast4	Pprc1	Ranbp17
Lamtor4	Mastl	Pqlc2	Rapgef5
Lbh	Mbd5	Prdx5	Rars2
Lcat	Mblac2	Prdx6	Rasgef1c
Ldb1	Mbnl1	Prelid1	Rasgrf1
Lemd2	Mbtd1	Prkag1	Rassf3
Lfng	Mcmdc2	Prkcdbp	Rbbp6
Lgals3bp	Mdga2	Prkd2	Rbm11
Limd2	Me1	Prorsd1	Rbm48
Limk1	Me3	Proser3	Rc3h1
Limk2	Mecom	Prpsap1	Retreg1
Lims2	Med12l	Prrt2	Rfc4
Lingo3	Med13	Psat1	Rfesd
Llgl1	Mef2c	Psd	Rgs17
Lman2	Megf9	Psd2	Rgs20
Lman2l	Memo1	Psmb3	Rgs22
Lmbr1l	Met	Psmb4	Rgs7bp
Lmf2	Mettl15	Psmc5	Ric3
Lmna	Mfap3l	Psmd2	Ric8b
Lmnb2	Mga	Psmd8	Rictor
Lmtk3	Mia2	Psmd9	Rlim
Lrfn1	Micu2	Psmg1	Rmdn2
Lrfn3	Micu3	Psph	Rnf128
Lrp1	Mid1	Psrc1	Rnf13
Lrp10	Mier1	Ptcd1	Rnf141
Lrp3	Mier3	Ptgds	Rnf144a
Lrp5	Mios	Ptgis	Rnf150
Lrrc10b	Mitf	Ptk7	Rnf17
Lrrc14	Mkln1	Ptpn1	Rnf180
Lrrc24	Mkx	Ptpn18	Rnf20
Lrrc32	Mlip	Ptpn23	Rnf219
Lrrc47	Mllt10	Ptrh1	Rnft1
Lrrc4b	Mllt3	Pus1	Rnls
Lrrc61	Mmp16	Pusl1	Rnpc3
Lrrc8a	Mnat1	Pvrl2	Robo1
Lrrtm1	Mob1b	Pxn	Rock1
Lrtm2	Morc2b	Rab13	Rock2
Lrwd1	Mospd2	Rab15	RP23-109G18.5
Lsm14b	Mphosph9	Rab24	RP23-114B10.4
Lsm2	Mpp6	Rab26	RP23-14F5.7
Lsm4	Mpped2	Rab29	RP23-152N9.3
Lsm7	Mpv17l	Rab34	RP23-156C20.1
Ltbp3	Mrpl1	Rab3a	RP23-173N16.6
Ltbp4	Msantd2	Rab3il1	RP23-185B14.1
Ly6a	Msrb3	Rab40c	RP23-206D14.1
Ly6h	Mtdh	Rabac1	RP23-206J9.3
Lypla2	Mtf2	Ralb	RP23-214L4.1
Lyz2	Mthfd1l	Ralgds	RP23-216C6.2
Lzts3	Mtm1	Ramp1	RP23-242C19.8
Mafb	Mtmr2	Ramp3	RP23-243J5.1
Mafg	Mtpap	Rara	RP23-252E4.2
Mafk	Mtpn	Rasa4	RP23-253N17.1
Mageh1	Mtx2	Rasal1	RP23-275N21.2
Manbal	Murc	Rasip1	RP23-282C23.7
Manf	Mybl1	Rasl10a	RP23-284J4.2
Map1s	Mybpc1	Rasl11a	RP23-2A21.1
Map2k2	Mycbp2	Rasl11b	RP23-304L22.1
Map3k10	Myef2	Rassf1	RP23-306I3.1
Map3k6	Mylk3	Rassf2	RP23-311O20.2
Map7d1	Myo16	Rbbp4	RP23-313O9.1
Mapk7	Myo1b	Rbm19	RP23-314A12.1
Mapk8ip1	Myo1d	Rbm38	RP23-325I3.1
Mapk8ip2	Myo5c	Rbms2	RP23-326E2.2
Mapk8ip3	Myo9a	Rcc1l	RP23-32E20.1
Mars	Mypn	Rcor2	RP23-330D3.6
Marveld1	Myt1l	Rcsd1	RP23-355G16.5
Mast3	Mzt1	Rdh13	RP23-376B19.2
Matk	N4bp2l2	Relt	RP23-377I11.1
Matn4	Naa15	Renbp	RP23-386E10.7
Mau2	Naa16	Rfxank	RP23-390N24.1
Maz	Naa30	Rgs16	RP23-424C4.5
Mbd3	Naaladl2	Rhbdd3	RP23-42I13.2
Mbd6	Nae1	Rhbdf1	RP23-42P24.4
Mcfd2	Nars2	Rhobtb2	RP23-445H7.1
Mcm2	Nav3	Rhoh	RP23-446P16.2
Mcrip2	Nbea	Rilpl1	RP23-466M3.1
Mdga1	Nbeal1	Rims4	RP23-467K15.2
Mdh2	Ncam2	Ripply2	RP23-47M24.3
Mdk	Nckap5	Rita1	RP23-49H16.1
Med11	Ncoa1	Rmdn3	RP23-67E6.2
Med16	Ncoa6	Rmnd5b	RP23-67E6.5
Med22	Ncoa7	Rnaseh1	RP23-71L21.2
Med25	Ncor1	Rnaseh2c	RP23-79J15.4
Med28	Ndst3	Rnaset2a	RP23-83O23.2
Megf6	Ndufaf6	Rnd1	RP23-90C6.1
Men1	Nebl	Rnf167	RP23-91K11.3
Mepce	Necab1	Rnf31	RP24-127M20.2
Mesdc1	Negr1	Rnf40	RP24-134N2.1
Mettl1	Nek1	Rnpep	RP24-177J9.4
Mex3d	Nek7	Rnps1	RP24-216A12.2
Mfge8	Nell1	Ror2	RP24-227O16.1
Mfng	Neo1	RP23-114A6.7	RP24-251F16.4
Mfsd10	Nes	RP23-115O3.10	RP24-269A16.1
Mfsd12	Neto1	RP23-123N23.5	RP24-276H6.1
Mfsd2a	Nfat5	RP23-140G16.1	RP24-320O9.1
Mfsd5	Nfatc3	RP23-162H6.1	RP24-344F2.1
Mgat1	Nfia	RP23-168M5.3	RP24-354I13.6
Mgat4b	Nfib	RP23-172B16.4	RP24-354K18.1
Mgrn1	Ngly1	RP23-180L12.1	RP24-406I15.3
Mib2	Nim1k	RP23-204N19.8	RP24-472I15.1
Mief2	Ninj2	RP23-230C2.2	RP24-481M4.2
Mien1	Nipbl	RP23-254N4.1	RP24-63F2.2
Mier2	Nkrf	RP23-289H16.2	RP24-77E13.10
Mif	Nktr	RP23-313J14.5	RP24-84I4.2
Mif4gd	Nlgn1	RP23-321M22.3	Rp9
Mink1	Nlk	RP23-325D10.1	Rpap2
Mknk2	Nln	RP23-328F3.4	Rpf1
Mlc1	Nmd3	RP23-335F6.3	Rpf2
Mlec	Nme7	RP23-341K9.1	Rpl4
Mlf2	Nol4	RP23-344D2.9	Rprd1a
Mllt1	Nop58	RP23-349B15.4	Rps6ka5
Mllt6	Nova1	RP23-359B23.5	Rps6ka6
Mlst8	Npas3	RP23-375N21.2	Rrm2b
Mlycd	Npat	RP23-37J21.3	Rsl1d1
Mmd2	Npnt	RP23-3M10.9	Rspo3
Mmp14	Nr3c1	RP23-437A9.3	Rsrc2
Mmp15	Nr4a2	RP23-448A11.15	Rtf1
Mmp17	Nr6a1	RP23-47P18.9	Rtn3
Mn1	Nrcam	RP23-6P9.7	Rtn4
Mnt	Nrg1	RP23-79E13.6	Rttn
Mon1a	Nrg3	RP23-94B13.4	Rufy2
Mon1b	Nrn1	RP23-95H5.1	Runx1t1
Mpdu1	Nrxn1	RP24-100B13.1	Rwdd1
Mpnd	Nrxn3	RP24-175N4.1	Rxfp1
Mpp2	Nsmce2	RP24-185O19.6	Samd15
Mpst	Nsun3	RP24-380G7.1	Samd5
Mrc2	Nt5dc1	RP24-426M1.3	Samsn1
Mrpl12	Ntm	RP24-535N4.2	Sap130
Mrpl14	Ntn4	Rpain	Sass6
Mrpl15	Ntng1	Rpl10	Sc5d
Mrpl17	Ntrk3	Rpl13a	Scaf11
Mrpl27	Nudt12	Rpl23a	Scel
Mrpl28	Nudt4	Rpl26	Scg3
Mrpl38	Nudt6	Rpl34	Scmh1
Mrpl4	Numb	Rpl9	Scml2
Mrpl52	Nvl	Rpn1	Scn1a
Mrpl9	Nwd2	Rpp21	Scn3a
Mrps12	Nxf7	Rpp25l	Scoc
Mrps16	Nxpe4	Rprm	Scyl2
Mrps18a	Nxph1	Rps13	Sdc2
Mrps24	Nyap2	Rps17	Sdpr
Mrps7	Oard1	Rps18	Sec22a
Mrto4	Ocrl	Rps19bp1	Sec24b
Msantd1	Ofd1	Rps6ka1	Sec61a2
Msl3l2	Ola1	Rps7	Sec62
Mt1	Olfr1564	Rrp36	Sema3c
Mt2	Olfr691	Rsl24d1	Sema3e
Mt3	Olfr78	Rtkn	Senp8
Mtch1	Omg	Rtn4rl2	Sep15
Mtg1	Opalin	Ruvbl1	Sept7
Mul1	Opcml	Rxrb	Serbp1
Mus81	Ophn1	S100a10	Serinc1
Mvp	Opn3	S100a6	Serpinb6a
Mxd4	Orc2	S1pr2	Sertad2
Mxra8	Orc3	S1pr3	Setd6
Mybbp1a	Orc4	Sac3d1	Setdb2
Mydgf	Osbpl6	Samm50	Sfr1
Myg1	Otud7a	Sap30	Sfrp4
Myh14	Otud7b	Saraf	Sgcd
Myh9	Oxr1	Sart1	Sgol2a
Myl6	P2ry14	Sart3	Sgpp1
Mypop	P3h2	Sat1	Sh3bgrl
Myrf	Pacrgl	Scamp5	Sh3kbp1
Naa38	Pak1	Scand1	Sh3yl1
Nagk	Pak3	Scarb1	Shprh
Nagpa	Pak7	Scarf2	Siglech
Nans	Palld	Scrt2	Sin3a
Naprt	Palmd	Sdc3	Skap1
Narfl	Pamr1	Sdhd	Skiv2l2
Nat14	Pan3	Sec14l1	Slain1
Natd1	Pank3	Sec61b	Slc1a3
Nbeal2	Papd4	Sema3b	Slc22a15
Nbl1	Papd5	Sema4a	Slc26a4
Ncan	Papolg	Sema4b	Slc2a9
Ncdn	Pard3b	Sema5b	Slc30a4
Ncln	Parg	Sema6c	Slc35a1
Ncor2	Park2	Senp3	Slc35a5
Ncs1	Parp8	Sephs2	Slc41a2
Ndst2	Pbdc1	Sepn1	Slc44a5
Ndufa1	Pbrm1	Sept9	Slc4a4
Ndufa11	Pcca	Serhl	Slc4a7
Ndufa12	Pcdh20	Serinc2	Slc8a3
Ndufa2	Pcdh7	Serp2	Slco4c1
Ndufa3	Pcdh9	Serpinb6b	Slit2
Ndufa6	Pcf11	Serpind1	Slitrk1
Ndufa8	Pcgf5	Sertad3	Slitrk3
Ndufaf3	Pclo	Sesn2	Slk
Ndufb10	Pcm1	Setd1b	Slmap
Ndufb11	Pcmtd1	Sgsm3	Slx4ip
Ndufb2	Pcnp	Sh2b2	Smad2
Ndufb6	Pcolce2	Sh3gl1	Smarca1
[truncated: 900 more rows]

[truncated: 1 more sheets: Overlapping EarlyResponseGenes]
