# Supplementary material for: An essential role for MEF2C in the cortical response to loss of sleep in mice
Source: eLife journal article supplement (doi:10.7554/elife.58331), 2020-08-27
Supplement: supp [file elife-58331-supp-v1.zip › elife_poa_e58331_Supplementary_file_3.xlsx]

## Sheet: GO_SHARED_UP
Category	ID	Name	Source	p-value	q-value Bonferroni	q-value FDR B&H	q-value FDR B&Y	Hit Count in Query List	Hit Count in Genome	Hit in Query List
GO: Molecular Function	GO:0005198	structural molecule activity		1.757E-8	4.021E-5	1.005E-5	8.356E-5	122	762	SLC25A29,BFSP2,SLC25A5,SPTBN4,LAMTOR4,MRPL15,EIF3B,MYL6,HCN2,RPL10A,CLDN11,SLC25A3,SLC9A3R2,SLC9A3R1,PLEC,COL1A2,MAPK8IP1,RPL36,COL9A2,CRYBB1,NCAN,SLC25A10,CROCC,MAP2K2,SLC25A38,DLG4,LAMTOR1,SLC25A42,MRPS16,ARPC1B,SLC25A51,MRPS18A,MRPL4,SLC25A22,MRPS7,MRTO4,ELN,IMP3,RPL3,RPL6,RPL7A,RPL8,RPL11,RPL15,RPL18,RPL27,RPL27A,RPL28,RPL31,RPL35A,RPL36AL,RPL37,RPL37A,RPL39,RPL41,RPLP0,RPLP1,RPLP2,MRPL12,MRP…
GO: Biological Process	GO:0050767	regulation of neurogenesis		1.369E-5	1.152E-1	1.010E-3	9.715E-3	113	784	ADRA2C,MIF,DISP3,AKT1,NLGN2,ULK1,PREX1,FOXO6,ENC1,APOE,FUOM,CPNE5,ARF6,ARHGDIA,MT3,NBL1,SYNGAP1,CDK5R1,EIF2B2,NME2,NOS1,NOTCH1,HAP1,CALR,CAMK2B,CTDSP1,PALM,NUMBL,ADGRG1,ANAPC2,NTN1,PLXNA1,PLXNB1,DLL4,NSMF,CSPG4,KDM4A,PRKCSH,CTNNB1,MAP2K2,SCRT1,DBN1,PTBP1,CASZ1,SEMA4C,PTPRF,RNF10,MUL1,RAC3,RAP1GAP,DTX1,DVL1,RET,FBXO31,OLIG2,SEZ6,KATNB1,TPBGL,HMG20B,FES,FGFR1,BAIAP2,CX3CL1,FKBP4,FOXG1,SEMA3F,SEMA6B…
GO: Biological Process	GO:1901657	glycosyl compound metabolic process		8.241E-9	6.932E-5	1.019E-6	9.801E-6	81	435	ACACB,ADSL,MIF,AK1,ALDOA,MPP2,AMPD2,GADD45GIP1,AKR7A2,UQCC3,FLCN,ATP5F1D,ATP5F1E,ATP5MC2,ATP5MC3,ATP5ME,ATP6V1B2,ATP5PO,BAD,NDUFA1,NDUFA2,NDUFA3,NDUFA6,NDUFA8,NDUFB2,NDUFB6,NDUFB7,NDUFB8,NDUFB10,NDUFV1,NDUFS6,NDUFS8,NDUFV3,IER3,NME2,CAD,NT5E,PFKL,UQCR10,NDUFB11,DDIT4,COX5B,NDUFS7,UCK1,UCKL1,DLG4,PANK4,NME6,ENO1,ENO2,NUDT18,TCIRG1,SDHC,SIRT6,ATP5MG,OGDHL,UQCRQ,FUCA1,COASY,GALK1,GAMT,STAT3,NT5C1A,N…
Disease	C0151889	Hyperreflexia	DisGeNET Curated	8.982E-6	8.215E-2	1.023E-2	9.918E-2	38	209	AMPD2,NDUFA1,NDUFA2,NDUFV1,NDUFS6,NDUFS8,SQSTM1,AP4M1,CHMP1A,PDYN,PEX10,ADGRG1,PEX16,PYCR2,NDUFAF3,PSAP,PEX5,DPAGT1,RFC2,BSCL2,ELN,RTN2,SLC2A1,PEX26,FTL,UQCRQ,SOD1,KIF1C,GAD1,GAMT,GCSH,SURF1,ATP13A2,HSD17B10,UCHL1,HRAS,CLIP2,LIMK1
Disease	C0023520	Leukodystrophy	DisGeNET Curated	1.006E-5	9.204E-2	1.023E-2	9.918E-2	21	86	ATP5F1E,NDUFA1,NDUFV1,NDUFS6,EIF2B4,EIF2B2,PYCR2,NDUFAF3,POLR1C,OLIG1,SCO2,OLIG2,SDHB,RNASEH2A,GFAP,GJB1,MLC1,SURF1,LMNB2,IBA57,GJC2
GO: Biological Process	GO:0036498	IRE1-mediated unfolded protein response		1.403E-5	1.180E-1	1.026E-3	9.869E-3	19	67	ACADVL,BAX,SRPRB,KLHDC3,DCTN1,CTDSP2,PDIA6,CXXC1,HYOU1,SYVN1,MYDGF,TMBIM6,TLN1,SEC61G,HSPA1A,HSPA5,WFS1,ZBTB17,LMNA
GO: Biological Process	GO:0022411	cellular component disassembly		2.089E-4	1.000E0	1.034E-2	9.937E-2	93	663	FZD1,ULK1,MMP14,MMP15,DBNL,APEH,GADD45GIP1,SPTBN4,MRPL15,MYH9,BAX,BANF1,BSG,SQSTM1,NME2,DDR1,NTHL1,CAPNS1,CCNB1,FURIN,CHMP1A,LSM4,DDIT4,TOMM7,CST3,PRKCD,CTNNB1,PHYHIP,DFFA,KIF19,AURKAIP1,DNASE2,FRAT1,DVL1,DVL2,MRPS16,FIS1,UPF1,EXOC8,MRPS18A,MRPL4,MRPS7,MAP1S,RNF41,ELN,ENDOG,RPL28,MRPL12,MRPS12,APC2,KATNB1,MRPL27,PI4K2A,FANCF,HAX1,CIB1,MRPL28,BCAN,MRPL17,GAS2L1,SMARCB1,SMARCD3,FSCN1,FZD2,SPTB,SREB…
GO: Biological Process	GO:0009152	purine ribonucleotide biosynthetic process		1.430E-5	1.203E-1	1.037E-3	9.968E-3	47	255	ACACB,ADCY3,ADCY5,ADCYAP1R1,ADORA2A,ADRA2A,ADSL,AK1,ALDOA,AMPD2,ADCY4,APLP1,APOE,UQCC3,FLCN,ATP5F1D,ATP5F1E,ATP5MC2,ATP5MC3,ATP5ME,ATP5PO,NME2,NOS1,NOS3,PALM,PFAS,CRH,PANK4,NME6,RAMP2,TCIRG1,ATP5MG,COASY,GART,STAT3,RUNDC3A,SURF1,GNAI2,GNG7,TIMP2,GUK1,HRH3,HTR1B,WFS1,IMPDH1,IMPDH2,ADSSL1
GO: Cellular Component	GO:1990904	ribonucleoprotein complex		6.314E-13	6.484E-10	1.081E-10	8.118E-10	133	745	CCDC97,NOB1,GADD45GIP1,KHSRP,MT3,MRPL15,JRK,CCAR2,EIF3B,EIF3F,LSM2,EIF3I,RPL10A,NFATC2,SQSTM1,SNU13,CALR,RRP9,PCBP1,CACTIN,NOC4L,LSM4,RPL36,SYF2,PPP1R8,SF3B5,FBLL1,EIF4A3,PSMC3,PIH1D1,MVP,SNRNP25,MRPS16,UPF1,MRPS18A,MRPL4,MRPS7,EEF2,MRTO4,DDX39A,IMP3,RPL3,RPL6,RPL7A,RPL8,RPL11,RPL15,RPL18,MTG1,RPL27,RPL27A,RPL28,RPL31,RPL35A,RPL36AL,SF3B4,RPL37,RPL37A,RPL39,RPL41,RPLP0,RPLP1,RPLP2,MRPL12,MRPS12,F…
GO: Cellular Component	GO:0098590	plasma membrane region		5.797E-4	5.954E-1	1.082E-2	8.132E-2	131	1041	ADCYAP1R1,SLC12A5,ADORA2A,UNC5A,ADRA2A,GRK2,AP2A1,NLGN2,KIF17,LRFN1,ANXA2,CNIH2,ARF6,RANGRF,ATF4,SLC41A1,VAMP8,HYAL2,ABCC3,HCN2,BCR,SLC5A6,CACNA1H,NOS1,NOS3,NOTCH1,CA11,DDR1,NT5E,GRASP,OXTR,PALM,CD81,PCDH8,SLC9A3R2,SLC9A3R1,NRXN2,PLEC,FXYD1,HOMER3,CNTFR,COMT,MINK1,NSMF,CSPG4,CAVIN1,CTNNB1,CYBA,CLSTN3,NDUFS7,LZTS3,PIEZO1,LRFN3,DBN1,PTH1R,SEMA4C,NECTIN1,DLG4,TESC,TMEM231,SLC29A4,SLC12A6,EPHA2,KIRRE…
GO: Biological Process	GO:0044087	regulation of cellular component biogenesis		2.240E-4	1.000E0	1.102E-2	1.060E-1	112	829	NLGN2,ULK1,MMP14,PREX1,VPS18,BMF,DBNL,APOE,ARF6,SPTBN4,RHOG,ARL2,ORMDL2,FHOD1,MDGA1,MYH9,HRK,ADGRB1,BAX,LDB1,WRAP73,NOTCH1,HAP1,OXTR,PALM,CDC34,CHMP1A,PIK3R2,UBQLN2,KANK2,TBC1D13,TBC1D10B,PRKCD,CTNNB1,CLSTN3,PIEZO1,PSMC3,DAPK3,DBN1,NECTIN1,PEX5,PIH1D1,RAP1GAP,VPS37B,ARPC1B,TBC1D10A,EPHA2,KIRREL1,RPA2,STUB1,RPS3,TBC1D16,RACK1,RAPGEF3,FES,HAX1,BAIAP2,FKBP4,SDC4,MIEF2,TCHP,ARPC1A,ASAP3,FUZ,MIEN1,SLC…
GO: Biological Process	GO:1903707	negative regulation of hemopoiesis		2.314E-4	1.000E0	1.131E-2	1.087E-1	28	142	HIST1H4I,HIST1H4A,HIST1H4D,HIST1H4F,HIST1H4C,HIST1H4H,TMEM176B,LDB1,NFKBIA,C1QC,NME2,NOTCH1,PGLYRP1,CARTPT,CTNNB1,MAFB,DTX1,TMEM176A,FOXJ1,CIB1,GAS2L1,KLF13,TOB2,PRMT1,INHA,ITPKB,JAK3,DLL1
GO: Biological Process	GO:0045638	negative regulation of myeloid cell differentiation		2.326E-4	1.000E0	1.131E-2	1.087E-1	21	94	HIST1H4I,HIST1H4A,HIST1H4D,HIST1H4F,HIST1H4C,HIST1H4H,LDB1,NFKBIA,C1QC,NME2,CARTPT,CTNNB1,MAFB,CIB1,GAS2L1,KLF13,TOB2,PRMT1,INHA,ITPKB,DLL1
GO: Biological Process	GO:0019080	viral gene expression		9.618E-17	8.091E-13	1.156E-13	1.111E-12	59	187	EIF3B,EIF3F,RPL10A,NOTCH1,FURIN,RPL36,POLR2E,POLR2I,POLR2K,POLR2L,PTBP1,RPL3,RPL6,RPL7A,RPL8,RPL11,RPL15,RPL18,RPL27,RPL27A,RPL28,RPL31,RPL35A,RPL37,RPL37A,RPL39,RPL41,RPLP0,RPLP1,RPLP2,RPS2,RPS3,RPS4X,RPS5,RPS8,RPS9,RPS10,RPS12,RPS15,RPS15A,RPS16,RPS20,RPS21,RPS23,RPS26,RPS27A,RPS28,RPS29,FAU,IFITM3,EIF3L,MON1B,TRIM32,SMARCB1,USF2,JUN,TRIM8,NELFE,RPSA
GO: Biological Process	GO:0042455	ribonucleoside biosynthetic process		1.243E-6	1.046E-2	1.175E-4	1.130E-3	30	121	ACACB,ADSL,AK1,ALDOA,UQCC3,FLCN,ATP5F1D,ATP5F1E,ATP5MC2,ATP5MC3,ATP5ME,ATP5PO,NME2,CAD,NT5E,UCK1,UCKL1,PANK4,NME6,TCIRG1,ATP5MG,COASY,STAT3,SURF1,GUK1,UMPS,IMPDH1,IMPDH2,ADSSL1,QTRT1
GO: Biological Process	GO:0097193	intrinsic apoptotic signaling pathway		2.438E-4	1.000E0	1.179E-2	1.133E-1	49	301	MIF,AKT1,BMF,FLCN,CCAR2,ATF4,BAD,BAX,IER3,CDKN1A,CDKN2D,SLC9A3R1,CHAC1,MAPK8IP1,DDIT4,PLEKHF1,ZNF385A,CRIP1,PRKCD,MAPK7,PRODH,TMEM161A,RAD9A,FIS1,EPHA2,RPS3,RACK1,MYBBP1A,HYOU1,SIVA1,PIAS4,TRIM32,SYVN1,SOD1,PERP,STK11,ERP29,GRINA,TMBIM6,TNFRSF1A,TPT1,PARK7,PPP1R15A,HRAS,HSPA1A,HSPB1,DIABLO,WFS1,BAG6
GO: Biological Process	GO:0051961	negative regulation of nervous system development		2.456E-4	1.000E0	1.181E-2	1.135E-1	50	309	DISP3,ULK1,APOE,FUOM,ARF6,ARHGDIA,MT3,MDGA1,SYNGAP1,CDK5R1,NOTCH1,CALR,CTDSP1,ADGRG1,NTN1,CSPG4,KDM4A,PRKCSH,CTNNB1,CASZ1,SEMA4C,RNF10,RAP1GAP,DTX1,OLIG2,SEZ6,FKBP4,FOXG1,SEMA3F,SEMA6B,CIB1,ATF5,SIX3,SLIT1,INPP5J,NKX6-2,GFAP,STAT3,PRPF19,HLA-A,VIM,WNT7A,WNT7B,ID1,ISL1,SEMA3G,RGMA,ITM2C,DLL1,LRP1
GO: Cellular Component	GO:0031975	envelope		2.996E-9	3.077E-6	1.187E-7	8.918E-7	173	1174	ACACB,ACADS,ACADVL,MDH2,TOMM5,DISP3,SLC25A29,ALOX5AP,MPST,TMEM176B,SLC25A5,BMF,LEMD2,APEH,APOE,ARL2,MT3,MRPL15,UQCC3,NUDT1,ASL,ATP2A3,ATP5F1D,ATP5F1E,ATP5MC2,ATP5MC3,ATP5ME,ATP5PO,CDS2,BAD,BAX,NDUFA1,NDUFA2,NDUFA3,NDUFA6,NDUFA8,NDUFB2,NDUFB6,NDUFB7,NDUFB8,NDUFB10,NDUFV1,NDUFS6,NDUFS8,NDUFV3,NME2,NOS1,NRGN,GRASP,PEBP1,RCC1,UQCR10,PHB,SLC25A3,TFPT,CLIC1,NOC4L,CNP,MAPK8IP1,NDUFB11,TOMM7,TNPO2,COX5B,…
GO: Cellular Component	GO:0030964	NADH dehydrogenase complex		3.237E-9	3.324E-6	1.187E-7	8.918E-7	19	43	NDUFA1,NDUFA2,NDUFA3,NDUFA6,NDUFA8,NDUFB2,NDUFB6,NDUFB7,NDUFB8,NDUFB10,NDUFV1,NDUFS6,NDUFS8,NDUFV3,NDUFB11,NDUFS7,NDUFA12,PARK7,NDUFA11
GO: Cellular Component	GO:0045271	respiratory chain complex I		3.237E-9	3.324E-6	1.187E-7	8.918E-7	19	43	NDUFA1,NDUFA2,NDUFA3,NDUFA6,NDUFA8,NDUFB2,NDUFB6,NDUFB7,NDUFB8,NDUFB10,NDUFV1,NDUFS6,NDUFS8,NDUFV3,NDUFB11,NDUFS7,NDUFA12,PARK7,NDUFA11
GO: Cellular Component	GO:0005747	mitochondrial respiratory chain complex I		3.237E-9	3.324E-6	1.187E-7	8.918E-7	19	43	NDUFA1,NDUFA2,NDUFA3,NDUFA6,NDUFA8,NDUFB2,NDUFB6,NDUFB7,NDUFB8,NDUFB10,NDUFV1,NDUFS6,NDUFS8,NDUFV3,NDUFB11,NDUFS7,NDUFA12,PARK7,NDUFA11
GO: Biological Process	GO:0072657	protein localization to membrane		3.676E-13	3.092E-9	1.189E-10	1.143E-9	104	515	AKT1,NLGN2,ANXA2,BMF,APOE,ARF6,SPTBN4,RHOG,RANGRF,SSNA1,DCHS1,VAMP8,BAD,BAX,SYNGAP1,RPL10A,CDK5R1,BSG,CACNB1,HGS,PALM,RAB11B,SRPRB,TAOK2,SLC9A3R1,NRXN2,PIK3R2,PEX16,TOMM7,RPL36,PLEKHF1,SYNE3,CSK,DYNLL2,DBN1,PEX5,DLG4,TESC,DVL1,FIS1,ARFRP1,EPHA2,EMP2,RPL3,RPL6,RPL7A,RPL8,RPL11,RPL15,RPL18,RPL27,RPL27A,RPL28,RPL31,RPL35A,RPL37,RPL37A,RAMP2,RPL39,RPL41,RPLP0,RPLP1,RPLP2,RPS2,RPS3,RPS4X,RPS5,RPS8,RPS…
GO: Biological Process	GO:0009259	ribonucleotide metabolic process		6.007E-11	5.053E-7	1.203E-8	1.157E-7	103	551	ACACB,ADCY3,ADCY5,ADCYAP1R1,ADORA2A,ADRA2A,ADSL,MIF,AK1,ALDOA,MPP2,AMPD2,ADCY4,APLP1,APOE,GADD45GIP1,UQCC3,FLCN,ATP5F1D,ATP5F1E,ATP5MC2,ATP5MC3,ATP5ME,ATP6V1B2,ATP5PO,BAD,NDUFA1,NDUFA2,NDUFA3,NDUFA6,NDUFA8,NDUFB2,NDUFB6,NDUFB7,NDUFB8,NDUFB10,NDUFV1,NDUFS6,NDUFS8,NDUFV3,IER3,NME2,NOS1,NOS3,CAD,NT5E,CBS,PALM,PDE1B,PFAS,PFKL,UQCR10,NDUFB11,DDIT4,COX5B,CRH,MAPK7,NDUFS7,UCK1,UCKL1,DLG4,PANK4,NME6,ENO1…
GO: Cellular Component	GO:0070469	respiratory chain		4.239E-8	4.353E-5	1.209E-6	9.083E-6	27	90	UQCC3,NDUFA1,NDUFA2,NDUFA3,NDUFA6,NDUFA8,NDUFB2,NDUFB6,NDUFB7,NDUFB8,NDUFB10,NDUFV1,NDUFS6,NDUFS8,NDUFV3,UQCR10,NDUFB11,NDUFS7,SDHB,SDHC,UQCRQ,NDUFA12,SURF1,UQCR11,PARK7,UQCRC1,NDUFA11
GO: Biological Process	GO:0070670	response to interleukin-4		2.535E-4	1.000E0	1.212E-2	1.165E-1	11	34	MCM2,ALAD,KEAP1,RPL3,RPLP0,RPS2,TUBA1B,FASN,HSPA5,IMPDH2,JAK3
GO: Biological Process	GO:0019693	ribose phosphate metabolic process		6.199E-11	5.215E-7	1.213E-8	1.166E-7	105	566	ACACB,ADCY3,ADCY5,ADCYAP1R1,ADORA2A,ADRA2A,ADSL,MIF,AK1,ALDOA,MPP2,AMPD2,ADCY4,APLP1,APOE,GADD45GIP1,UQCC3,FLCN,ATP5F1D,ATP5F1E,ATP5MC2,ATP5MC3,ATP5ME,ATP6V1B2,ATP5PO,BAD,NDUFA1,NDUFA2,NDUFA3,NDUFA6,NDUFA8,NDUFB2,NDUFB6,NDUFB7,NDUFB8,NDUFB10,NDUFV1,NDUFS6,NDUFS8,NDUFV3,IER3,NME2,NOS1,NOS3,CAD,NT5E,CBS,PALM,PDE1B,PFAS,PFKL,UQCR10,PGLS,NDUFB11,DDIT4,COX5B,CRH,MAPK7,NDUFS7,UCK1,UCKL1,DLG4,PANK4,NME6…
GO: Biological Process	GO:0032984	protein-containing complex disassembly		2.556E-4	1.000E0	1.215E-2	1.168E-1	46	278	FZD1,DBNL,APEH,GADD45GIP1,SPTBN4,MRPL15,MYH9,CHMP1A,DDIT4,CTNNB1,KIF19,AURKAIP1,FRAT1,DVL1,DVL2,MRPS16,UPF1,MRPS18A,MRPL4,MRPS7,MAP1S,MRPL12,MRPS12,APC2,KATNB1,MRPL27,CIB1,MRPL28,MRPL17,GAS2L1,SMARCB1,SMARCD3,FZD2,SPTB,CARMIL2,TRIOBP,GSN,HMGA1,MRPL14,MRPS24,MRPL38,MRPL9,TFIP11,FZD5,MRPL52,LRP5
GO: Biological Process	GO:0016071	mRNA metabolic process		1.299E-6	1.093E-2	1.215E-4	1.168E-3	103	664	APLP1,KHSRP,CCAR2,LSM2,SRSF9,RPL10A,SNU13,CCNB1,PCBP1,SCAF1,CACTIN,TSEN34,CPSF1,LSM4,EXOSC4,RPL36,POLR2E,POLR2I,POLR2K,POLR2L,SYF2,GTPBP1,AAR2,THOC6,PPP1R8,GTPBP2,DHX34,SF3B5,EIF4A3,PTBP1,DXO,SNRNP25,UPF1,DAZAP1,RNH1,MRTO4,DDX39A,RPL3,RPL6,RPL7A,RPL8,RPL11,RPL15,RPL18,RPL27,RPL27A,RPL28,RPL31,RPL35A,SF3B4,RPL37,RPL37A,RPL39,RPL41,RPLP0,RPLP1,RPLP2,RPS2,RPS3,RPS4X,RPS5,RPS8,RPS9,RPS10,RPS12,RPS15,…
GO: Biological Process	GO:0072521	purine-containing compound metabolic process		1.019E-8	8.575E-5	1.243E-6	1.195E-5	103	603	ACACB,ADCY3,ADCY5,ADCYAP1R1,ADORA2A,ADRA2A,ADSL,MIF,AK1,ALDOA,MPP2,AMPD2,ADCY4,APLP1,APOE,GADD45GIP1,UQCC3,NUDT1,FLCN,ATP5F1D,ATP5F1E,ATP5MC2,ATP5MC3,ATP5ME,ATP6V1B2,ATP5PO,BAD,NDUFA1,NDUFA2,NDUFA3,NDUFA6,NDUFA8,NDUFB2,NDUFB6,NDUFB7,NDUFB8,NDUFB10,NDUFV1,NDUFS6,NDUFS8,NDUFV3,IER3,NME2,NOS1,NOS3,NT5E,CBS,PALM,PDE1B,PFAS,PFKL,UQCR10,NDUFB11,DDIT4,COX5B,CRH,MAPK7,NDUFS7,DLG4,PANK4,NME6,ENO1,ENO2,NUD…
GO: Biological Process	GO:1901533	negative regulation of hematopoietic progenitor cell differentiation		2.635E-4	1.000E0	1.245E-2	1.197E-1	9	24	HIST1H4I,HIST1H4A,HIST1H4D,HIST1H4F,HIST1H4C,HIST1H4H,NOTCH1,CIB1,PRMT1
GO: Biological Process	GO:0006364	rRNA processing		1.513E-15	1.272E-11	1.272E-12	1.223E-11	70	260	WDR18,DHX37,NOB1,RPL10A,BYSL,SNU13,RRP9,ABT1,NOC4L,TSR3,EXOSC4,MRM2,RPL36,DDX49,CSNK1D,FBLL1,EIF4A3,MRTO4,IMP3,RPL3,RPL6,RPL7A,RPL8,RBFA,RPL11,RPL15,RPL18,RPL27,RPL27A,RPL28,RPL31,RPL35A,RPL37,RPL37A,RPL39,RPL41,RPLP0,RPLP1,RPLP2,FBL,RPS2,RPS3,RPS4X,RPS5,RPS8,RPS9,RPS10,RPS12,RPS15,RPS15A,RPS16,RPS20,RPS21,RPS23,RPS26,RPS27A,RPS28,RPS29,NPM3,FAU,EMG1,NHP2,TBL3,NSUN5,PDCD11,RRP7A,BOP1,NOL6,EXOSC5,…
GO: Biological Process	GO:0022008	neurogenesis		1.242E-7	1.045E-3	1.274E-5	1.225E-4	221	1628	GPRIN1,SLC12A5,FZD1,FZD8,ADORA2A,UNC5A,ADRA2C,MIF,DISP3,IGSF9,AKT1,NLGN2,ULK1,MMP14,KIF17,PREX1,LRFN1,FOXO6,GIT1,ENC1,LEMD2,DBNL,KLF15,APOE,FUOM,CPNE5,BLOC1S2,ARF6,SPTBN4,ARHGDIA,MT3,DCHS1,MDGA1,AXL,ADGRB1,BAX,NBL1,SYNGAP1,CDK5R1,LDB1,EIF2B4,EIF2B2,BYSL,NNAT,NME2,MYRF,NOS1,NOTCH1,DDR1,HAP1,CALR,CAMK2B,CTDSP1,PALM,NUMBL,ADGRG1,CHAT,ABT1,SLC9A3R1,ANAPC2,NTN1,PLXNA1,CNP,PLXNB1,CHAC1,DDIT4,DLL4,MINK1…
GO: Cellular Component	GO:0030054	cell junction		1.815E-11	1.864E-8	1.288E-9	9.675E-9	185	1200	ADCYAP1R1,FZD1,IGSF9,AKT1,NLGN2,MMP14,MPST,LRFN1,GIT1,ANXA2,CNIH2,DBNL,ARF6,SPTBN4,RHOB,RHOG,RANGRF,FLCN,MYH9,ADGRB1,FGFRL1,CCND1,BCR,SYNGAP1,RPL10A,BSG,NME2,NOTCH1,CCN3,HAP1,CALR,GRASP,CCND3,CLDN11,OXTR,CD81,CD151,PCDH1,PCDH8,RAB11B,CBARP,SLC9A3R2,PIK3R2,ZFYVE21,PLEC,HOMER3,CNN2,MINK1,TRAF4,CBLN4,NSMF,CSK,CSPG4,CSRP2,PRKCD,CTNNB1,MAP2K2,CYBA,TES,LZTS3,SYT12,LRFN3,KEAP1,DBN1,SEMA4C,PTPRN,PARD6A,S…
GO: Cellular Component	GO:0036477	somatodendritic compartment		1.881E-11	1.932E-8	1.288E-9	9.675E-9	144	867	CYGB,LMTK3,SLC12A5,ADORA2A,UNC5A,GRK2,IGSF9,NLGN2,ULK1,PREX1,BEGAIN,AMFR,ADCY4,CNIH2,HCN3,ENC1,DBNL,APOE,CPNE5,KHSRP,SPTBN4,MT3,ASL,ATP1A3,HCN2,SYNGAP1,CDK5R1,CACNA1H,NOS1,CCN3,CAD,NRGN,HAP1,CAMK2B,NTS,PEBP1,PALM,PCDH8,PDE1B,PDYN,CHAT,TAOK2,TXN2,PNOC,PMM1,MAPK8IP1,COMT,MINK1,ZNF385A,CRH,SLC32A1,RIN1,NSMF,PPP5C,CST3,CTNNB1,CYBA,NDUFS7,LZTS3,EIF4A3,LRFN3,DBN1,PTPRF,PTPRN,PARD6A,NQO1,DLG4,MUL1,RAC3,…
GO: Biological Process	GO:0042063	gliogenesis		2.777E-4	1.000E0	1.305E-2	1.255E-1	46	279	ADORA2A,AKT1,MMP14,KLF15,MT3,CDK5R1,EIF2B4,EIF2B2,MYRF,NOTCH1,ADGRG1,CNP,MXRA8,POU3F1,CSK,CSPG4,KDM4A,CTNNB1,DBI,PHGDH,RNF10,OLIG1,DTX1,EEF2,OLIG2,HDAC11,LAMC3,SOCS7,FOXG1,ATF5,SMO,SOD1,ZCCHC24,NKX6-2,SPINT1,GFAP,STAT3,PRPF19,GPC1,GSN,GSTP1,SCRIB,VIM,LAMB1,LAMB2,DLL1
GO: Biological Process	GO:0045595	regulation of cell differentiation		1.431E-6	1.204E-2	1.323E-4	1.272E-3	223	1699	MAFG,ACVR2B,MCRIP1,HIST1H4I,MEN1,FZD1,ADRA2C,AP2A2,HIST1H4A,HIST1H4D,HIST1H4F,HIST1H4C,HIST1H4H,MIF,DISP3,AKT1,FOXO4,NLGN2,ULK1,MMP14,LTBP4,PREX1,FOXO6,TMEM176B,ENC1,APOE,FUOM,CPNE5,ARF6,ARHGDIA,MT3,DLK2,GLIPR2,FLCN,BCL9L,AXL,BAD,FADD,BAX,NBL1,CCND1,SYNGAP1,CDK5R1,LDB1,NFATC2,NFKBIA,EIF2B2,C1QC,NME2,NOS1,NOTCH1,NOTCH2,NOTCH4,CCN3,PGLYRP1,HAP1,CALR,CAMK2B,CTDSP1,PALM,NUMBL,ADGRG1,CLIC1,ANAPC2,BAMB…
GO: Biological Process	GO:0007268	chemical synaptic transmission		2.916E-4	1.000E0	1.348E-2	1.296E-1	94	678	SLC12A5,ADORA2A,AKT1,NLGN2,DOC2B,LRFN1,PPFIA4,CNIH2,APOE,PPFIA3,NPAS4,SYNGAP1,BAIAP3,NOS1,CACNB1,NPTX2,NRGN,HAP1,CAMK2B,OXTR,PEBP1,PCDH8,PDYN,CHAT,NRXN2,ANAPC2,PLCB3,CNP,PNOC,CORT,MINK1,CRH,SLC32A1,CARTPT,RIN1,CELSR1,NSMF,CTNNB1,CLSTN3,SYT12,EIF4A3,LRFN3,DBI,DBN1,PTPRF,SV2A,NQO1,DLG4,DMPK,RAC3,SLC12A6,DVL1,TPGS1,CACNG7,EGR3,EIF4EBP2,SEZ6,BAIAP2,CX3CL1,BCAN,RGS14,SLC8A2,SLC12A4,BRSK1,GAD1,JPH4,SRF…
GO: Biological Process	GO:0098916	anterograde trans-synaptic signaling		2.916E-4	1.000E0	1.348E-2	1.296E-1	94	678	SLC12A5,ADORA2A,AKT1,NLGN2,DOC2B,LRFN1,PPFIA4,CNIH2,APOE,PPFIA3,NPAS4,SYNGAP1,BAIAP3,NOS1,CACNB1,NPTX2,NRGN,HAP1,CAMK2B,OXTR,PEBP1,PCDH8,PDYN,CHAT,NRXN2,ANAPC2,PLCB3,CNP,PNOC,CORT,MINK1,CRH,SLC32A1,CARTPT,RIN1,CELSR1,NSMF,CTNNB1,CLSTN3,SYT12,EIF4A3,LRFN3,DBI,DBN1,PTPRF,SV2A,NQO1,DLG4,DMPK,RAC3,SLC12A6,DVL1,TPGS1,CACNG7,EGR3,EIF4EBP2,SEZ6,BAIAP2,CX3CL1,BCAN,RGS14,SLC8A2,SLC12A4,BRSK1,GAD1,JPH4,SRF…
GO: Biological Process	GO:0099537	trans-synaptic signaling		2.916E-4	1.000E0	1.348E-2	1.296E-1	94	678	SLC12A5,ADORA2A,AKT1,NLGN2,DOC2B,LRFN1,PPFIA4,CNIH2,APOE,PPFIA3,NPAS4,SYNGAP1,BAIAP3,NOS1,CACNB1,NPTX2,NRGN,HAP1,CAMK2B,OXTR,PEBP1,PCDH8,PDYN,CHAT,NRXN2,ANAPC2,PLCB3,CNP,PNOC,CORT,MINK1,CRH,SLC32A1,CARTPT,RIN1,CELSR1,NSMF,CTNNB1,CLSTN3,SYT12,EIF4A3,LRFN3,DBI,DBN1,PTPRF,SV2A,NQO1,DLG4,DMPK,RAC3,SLC12A6,DVL1,TPGS1,CACNG7,EGR3,EIF4EBP2,SEZ6,BAIAP2,CX3CL1,BCAN,RGS14,SLC8A2,SLC12A4,BRSK1,GAD1,JPH4,SRF…
GO: Biological Process	GO:0072594	establishment of protein localization to organelle		8.840E-10	7.437E-6	1.352E-7	1.300E-6	116	676	TOMM5,BAP1,FZD1,AKT1,BMF,MT3,HYAL2,BAD,BAX,RPL10A,NFKBIA,NFKBIB,NFKBIL1,CCN3,AIP,OGG1,HGS,CDKN1A,LRWD1,PEX10,SRPRB,SLC9A3R1,PIK3R2,PEX16,BAMBI,TOMM7,RPL36,TNPO2,DYNLL2,IPO13,PRKCD,CTNNB1,MAPK7,KEAP1,PEX5,PIH1D1,RAN,FIS1,PAM16,IPO4,TRIM28,NAGPA,RPL3,RPL6,RPL7A,RPL8,RPL11,RPL15,RPL18,RPL27,RPL27A,RPL28,RPL31,RPL35A,RPL37,RPL37A,RPL39,RPL41,RPLP0,RPLP1,RPLP2,RPS2,RPS3,RPS4X,RPS5,APC2,RPS8,RPS9,RPS10…
GO: Biological Process	GO:0090559	regulation of membrane permeability		2.972E-4	1.000E0	1.366E-2	1.313E-1	18	76	SLC25A5,BMF,BLOC1S2,MT3,BAD,BAX,IER3,CNP,PLEKHF1,DYNLL2,MUL1,ALKBH7,SIVA1,SLC9A1,STAT3,HSPA1A,YWHAG,RHOT2
GO: Biological Process	GO:0021782	glial cell development		2.988E-4	1.000E0	1.366E-2	1.313E-1	20	89	ADORA2A,AKT1,MT3,EIF2B4,EIF2B2,MYRF,MXRA8,POU3F1,PHGDH,HDAC11,LAMC3,SMO,SOD1,NKX6-2,GFAP,GSN,GSTP1,VIM,LAMB2,DLL1
GO: Cellular Component	GO:0098589	membrane region		5.894E-5	6.053E-2	1.376E-3	1.033E-2	162	1267	ADCY3,ADCY5,ADCYAP1R1,SLC12A5,ADORA2A,UNC5A,ADRA2A,GRK2,AP2A1,AP2A2,NLGN2,KIF17,LRFN1,ANXA2,CNIH2,ARF6,LAMTOR4,RANGRF,ATF4,SLC41A1,VAMP8,MDGA1,HYAL2,ABCC3,FADD,HCN2,BCR,BSG,SLC5A6,CACNA1H,NOS1,NOS3,NOTCH1,CA11,DDR1,NT5E,HIP1R,SERPINH1,GRASP,OXTR,FURIN,PALM,CD81,PCDH8,SLC9A3R2,AP1S1,AP2S1,SLC9A3R1,NRXN2,PLEC,EPN1,FXYD1,HOMER3,CNTFR,COMT,MINK1,NSMF,LRP10,CSK,CSPG4,CAVIN1,CTNNB1,CYBA,CLSTN3,NDUFS7,L…
GO: Biological Process	GO:0006605	protein targeting		9.268E-10	7.797E-6	1.392E-7	1.339E-6	122	723	TOMM5,BAP1,FZD1,AKT1,ANXA2,MT3,HYAL2,RPL10A,CDK5R1,BSG,NFKBIA,NFKBIB,NFKBIL1,CCN3,CACNB1,AIP,OGG1,HGS,PALM,CDKN1A,PEX10,SRPRB,TAOK2,SLC9A3R1,PIK3R2,PEX16,BAMBI,HOMER3,TOMM7,RPL36,TNPO2,IPO13,PRKCD,CTNNB1,MAPK7,KEAP1,PEX5,TESC,RAN,FIS1,PAM16,IPO4,TRIM28,NAGPA,RPL3,RPL6,RPL7A,RPL8,RPL11,RPL15,RPL18,RPL27,RPL27A,RPL28,RPL31,RPL35A,RPL37,RPL37A,RPL39,RPL41,RPLP0,RPLP1,RPLP2,RPS2,RPS3,RPS4X,RPS5,APC2,…
GO: Biological Process	GO:0006469	negative regulation of protein kinase activity		3.065E-4	1.000E0	1.394E-2	1.340E-1	42	249	MEN1,ADORA2A,MLLT1,AKT1,APOE,HYAL2,CDKN1A,CDKN2D,MAPK8IP1,PRKCD,MAPK7,TESC,MVP,DUSP4,DUSP8,DVL1,FBXO31,SPRY2,SOCS7,RACK1,PPP1R1B,FEM1A,CIB1,SHB,HEXIM1,RGS14,ZGPAT,GADD45G,SRCIN1,PTPN5,GSTP1,SH3BP5L,PARK7,UCHL1,FLRT1,HSPB1,YWHAG,LRRTM1,LRRC4B,CAMK2N2,SPRY4,LRP5
GO: Biological Process	GO:0009123	nucleoside monophosphate metabolic process		5.806E-12	4.884E-8	1.395E-9	1.342E-8	70	304	ADSL,MIF,AK1,ALDOA,MPP2,AMPD2,GADD45GIP1,UQCC3,FLCN,ATP5F1D,ATP5F1E,ATP5MC2,ATP5MC3,ATP5ME,ATP6V1B2,ATP5PO,BAD,NDUFA1,NDUFA2,NDUFA3,NDUFA6,NDUFA8,NDUFB2,NDUFB6,NDUFB7,NDUFB8,NDUFB10,NDUFV1,NDUFS6,NDUFS8,NDUFV3,IER3,CAD,NT5E,PFAS,PFKL,UQCR10,NDUFB11,DDIT4,COX5B,NDUFS7,UCK1,UCKL1,DLG4,ENO1,ENO2,TCIRG1,SDHC,SIRT6,ATP5MG,OGDHL,UQCRQ,GALK1,GART,STAT3,NT5C1A,NDUFA12,SURF1,UQCR11,GPD1,GUK1,PARK7,UMPS,UQ…
GO: Cellular Component	GO:0044452	nucleolar part		7.618E-4	7.824E-1	1.397E-2	1.050E-1	16	70	SNU13,TAF1C,RRP9,POLR2E,POLR1C,POLR2K,POLR2L,FBLL1,IMP3,FBL,EIF3L,NHP2,TBL3,RRP7A,BOP1,NOL6
GO: Cellular Component	GO:0042175	nuclear outer membrane-endoplasmic reticulum membrane network		6.204E-5	6.372E-2	1.416E-3	1.064E-2	134	1015	OSBPL7,DISP3,ALOX5AP,AMFR,MCFD2,CNIH2,RHOG,ORMDL2,ATP2A3,AUP1,CDS2,BAX,NFE2L1,MYRF,NOS1,NOTCH1,NOTCH2,NOTCH4,CALR,CAMK2B,TMED4,FURIN,DPM3,SRPRB,LMF2,PEX16,TMCO1,PLOD1,MAPK8IP1,MPDU1,POR,ATF6B,PITPNM1,P4HTM,SYNE3,SEC24C,TMED9,FITM2,CYBA,CLSTN3,MLEC,PIEZO1,TMEM214,RETSAT,DDOST,CANT1,PCYT2,EMC10,DMPK,DPAGT1,FAM57B,PDCD6,TAPBPL,EMC9,SEZ6L2,PDIA6,APH1A,IER3IP1,BSCL2,RTN2,RYR1,TMEM129,CDIPT,FKBP4,FKBP5…
GO: Biological Process	GO:0035567	non-canonical Wnt signaling pathway		3.153E-4	1.000E0	1.419E-2	1.365E-1	30	159	FZD1,FZD8,AP2A1,AP2A2,AP2S1,PLCB2,PLCB3,ARHGEF19,CELSR1,CSNK1D,CTNNB1,PSMA7,PSMB5,PSMB6,PSMB8,PSMB10,PSMC3,PSMD3,PSMD4,PARD6A,DVL1,DVL2,RPS27A,SMO,FZD2,AGO2,UBC,WNT7A,WNT7B,FZD5
GO: Biological Process	GO:0046902	regulation of mitochondrial membrane permeability		3.155E-4	1.000E0	1.419E-2	1.365E-1	17	70	SLC25A5,BMF,BLOC1S2,BAD,BAX,IER3,CNP,PLEKHF1,DYNLL2,MUL1,ALKBH7,SIVA1,SLC9A1,STAT3,HSPA1A,YWHAG,RHOT2
GO: Cellular Component	GO:0043025	neuronal cell body		5.621E-6	5.773E-3	1.443E-4	1.084E-3	93	616	CYGB,SLC12A5,ADORA2A,UNC5A,ULK1,BEGAIN,AMFR,HCN3,ENC1,APOE,CPNE5,KHSRP,SPTBN4,ASL,HCN2,CDK5R1,CACNA1H,CCN3,CAD,NRGN,CAMK2B,NTS,PEBP1,PDE1B,PDYN,CHAT,TXN2,PNOC,PMM1,ZNF385A,CRH,RIN1,NSMF,PPP5C,CST3,CYBA,NDUFS7,EIF4A3,DBN1,PTPRF,PTPRN,PARD6A,NQO1,MUL1,RAC3,RAP1GAP,DVL1,RET,SEZ6L2,MAP1S,FBXO31,SLC38A7,TNK2,ENDOG,ENO2,SEZ6,GLRX5,KATNB1,PI4K2A,NRSN2,RACK1,RAPGEF3,PPP1R1B,BAIAP2,FKBP4,CIB1,DLGAP4,SLC8A…
GO: Biological Process	GO:0019637	organophosphate metabolic process		1.598E-6	1.344E-2	1.461E-4	1.405E-3	162	1164	ACACB,MDH2,ADCY3,ADCY5,ADCYAP1R1,ADORA2A,ADRA2A,ADSL,MIF,AK1,ALDOA,MPP2,AMPD2,ADCY4,APLP1,APOE,GADD45GIP1,PDXK,ARF3,UQCC3,NUDT1,FLCN,IRS2,ATP5F1D,ATP5F1E,ATP5MC2,ATP5MC3,ATP5ME,ATP6V1B2,ATP5PO,CDS2,BAD,NDUFA1,NDUFA2,NDUFA3,NDUFA6,NDUFA8,NDUFB2,NDUFB6,NDUFB7,NDUFB8,NDUFB10,NDUFV1,NDUFS6,NDUFS8,NDUFV3,IER3,PIP4P1,NME2,NOS1,NOS3,CAD,NT5E,NTHL1,OGG1,CBS,PALM,CD81,PCK2,PDE1B,GLYCTK,DPM3,PFAS,CHAT,PFKL…
GO: Biological Process	GO:0048666	neuron development		3.398E-4	1.000E0	1.521E-2	1.462E-1	143	1114	GPRIN1,SLC12A5,ADORA2A,UNC5A,MIF,IGSF9,AKT1,NLGN2,ULK1,PREX1,LRFN1,FOXO6,GIT1,ENC1,DBNL,APOE,CPNE5,BLOC1S2,ARF6,SPTBN4,ARHGDIA,MT3,ADGRB1,NBL1,SYNGAP1,CDK5R1,EIF2B2,NME2,NOTCH1,DDR1,HAP1,CAMK2B,PALM,NUMBL,CHAT,SLC9A3R1,ANAPC2,NTN1,PLXNA1,CNP,PLXNB1,MINK1,NSMF,CSPG4,DYNLL2,PRKCSH,MAP2K2,KIF26A,LRFN3,DBN1,PTBP1,PHGDH,SEMA4C,PTPRF,NECTIN1,DLG4,NYAP1,MUL1,RAC3,SAMD4B,DVL1,RET,EFNB3,MAP1S,FBXO31,SEZ6,…
GO: Biological Process	GO:0046390	ribose phosphate biosynthetic process		1.685E-6	1.418E-2	1.524E-4	1.466E-3	52	272	ACACB,ADCY3,ADCY5,ADCYAP1R1,ADORA2A,ADRA2A,ADSL,AK1,ALDOA,AMPD2,ADCY4,APLP1,APOE,UQCC3,FLCN,ATP5F1D,ATP5F1E,ATP5MC2,ATP5MC3,ATP5ME,ATP5PO,NME2,NOS1,NOS3,CAD,PALM,PFAS,CRH,UCK1,UCKL1,PANK4,NME6,RAMP2,TCIRG1,ATP5MG,COASY,GART,STAT3,RUNDC3A,SURF1,GNAI2,GNG7,TIMP2,GUK1,TKT,HRH3,UMPS,HTR1B,WFS1,IMPDH1,IMPDH2,ADSSL1
GO: Biological Process	GO:0000028	ribosomal small subunit assembly		3.476E-4	1.000E0	1.547E-2	1.487E-1	8	20	ABT1,MRPS7,RPS2,RPS5,RPS10,RPS15,RRP7A,RPSA
GO: Cellular Component	GO:0019866	organelle inner membrane		5.609E-8	5.760E-5	1.557E-6	1.169E-5	94	564	ACADVL,MDH2,SLC25A29,MPST,SLC25A5,LEMD2,MRPL15,UQCC3,ATP5F1D,ATP5F1E,ATP5MC2,ATP5MC3,ATP5ME,ATP5PO,CDS2,NDUFA1,NDUFA2,NDUFA3,NDUFA6,NDUFA8,NDUFB2,NDUFB6,NDUFB7,NDUFB8,NDUFB10,NDUFV1,NDUFS6,NDUFS8,NDUFV3,UQCR10,PHB,SLC25A3,CNP,NDUFB11,COX5B,NDUFAF3,SLC25A10,PRODH,ROMO1,NDUFS7,SLC25A38,AURKAIP1,SCO2,SLC25A42,MRPS16,PAM16,SLC25A51,MRPS18A,MRPL4,SLC25A22,MRPS7,TMEM120A,MTG1,MRPL12,MRPS12,RPS3,SLC25A3…
GO: Cellular Component	GO:0005925	focal adhesion		1.062E-12	1.091E-9	1.559E-10	1.171E-9	84	393	FZD1,MMP14,GIT1,ARF6,RHOB,RHOG,MYH9,RPL10A,BSG,NME2,CALR,CCND3,CD81,CD151,SLC9A3R2,PIK3R2,ZFYVE21,PLEC,CNN2,CSPG4,CSRP2,CTNNB1,MAP2K2,CYBA,TES,KEAP1,MRC2,ARPC1B,EPHA2,RPL3,RPL6,RPL7A,RPL8,RPL18,RPL27,RPL31,RPL37A,RPLP0,RPLP1,RPLP2,RPS2,RPS3,RPS4X,RPS5,RPS8,RPS9,RPS10,RPS15,RPS16,RPS29,FES,SDC4,FLII,ITGA11,HYOU1,ASAP3,LIMS2,SLC9A1,FZD2,PDLIM2,TRIOBP,TNS2,SRCIN1,GSN,CDC42EP1,TGM2,TLN1,TSPAN4,HMGA1,…
GO: Biological Process	GO:0007005	mitochondrion organization		1.755E-6	1.476E-2	1.571E-4	1.510E-3	115	767	TOMM5,BAP1,AKT1,ULK1,SLC25A5,BMF,BLOC1S2,GADD45GIP1,MRPL15,UQCC3,FLCN,CCAR2,HRK,BAD,BAX,NDUFA1,NDUFA2,NDUFA3,NDUFA6,NDUFA8,NDUFB2,NDUFB6,NDUFB7,NDUFB8,NDUFB10,NDUFV1,NDUFS6,NDUFS8,NDUFV3,IER3,SQSTM1,NME2,NOS3,NTHL1,AIP,UQCR10,PHB,LSM4,CNP,NDUFB11,TOMM7,PLEKHF1,NDUFAF3,POLRMT,DYNLL2,NDUFS7,PET100,PHYHIP,PEX5,AURKAIP1,MUL1,MRPS16,FIS1,PAM16,MRPS18A,MRPL4,MRPS7,MYH14,RNF41,MTG1,RPL28,MRPL12,MRPS12,E…
GO: Biological Process	GO:0031400	negative regulation of protein modification process		2.220E-5	1.868E-1	1.596E-3	1.535E-2	98	666	LMTK3,ELFN2,MEN1,ADORA2A,MLLT1,AKT1,LEMD2,KLF15,APOE,FLCN,HYAL2,PELI3,BAX,NOS1,CTDSP1,CCNB1,PEBP1,CDKN1A,CDKN2D,PHB,CACTIN,SLC9A3R1,ANAPC2,MAPK8IP1,DDIT4,PTPA,PPP5C,CSK,PRKCD,CTBP1,KDM4A,CTNNB1,MAPK7,PSMA7,PSMB5,PSMB6,PSMB8,PSMB10,PSMC3,PSMD3,PSMD4,PARD6A,PPP1R37,TESC,PIH1D1,MVP,DUSP4,DUSP8,DVL1,CTDSP2,FBXO31,KIRREL1,SPRY2,RPS3,WDR81,RPS27A,SOCS7,HMG20B,FZR1,FBLN1,RACK1,PPP1R1B,FEM1A,CIB1,SHB,ANA…
GO: Biological Process	GO:0070972	protein localization to endoplasmic reticulum		9.645E-18	8.114E-14	1.623E-14	1.560E-13	48	125	RPL10A,SRPRB,PEX16,RPL36,RPL3,RPL6,RPL7A,RPL8,RPL11,RPL15,RPL18,RPL27,RPL27A,RPL28,RPL31,RPL35A,RPL37,RPL37A,RPL39,RPL41,RPLP0,RPLP1,RPLP2,RPS2,RPS3,RPS4X,RPS5,RPS8,RPS9,RPS10,RPS12,RPS15,RPS15A,RPS16,RPS20,RPS21,RPS23,RPS26,RPS27A,RPS28,RPS29,FAU,SRP54,SEC61G,PPP1R15A,HSPA5,ZFAND2B,RPSA
GO: Molecular Function	GO:0000702	oxidized base lesion DNA N-glycosylase activity		9.951E-5	2.278E-1	1.627E-2	1.353E-1	4	4	NTHL1,OGG1,RPS3,SMUG1
GO: Biological Process	GO:0045746	negative regulation of Notch signaling pathway		3.674E-4	1.000E0	1.627E-2	1.564E-1	10	30	MMP14,DLK2,NFKBIA,NOTCH4,CHAC1,DLL4,EGFL7,HIF1AN,GDPD5,LFNG
GO: Biological Process	GO:0006839	mitochondrial transport		2.293E-5	1.929E-1	1.635E-3	1.572E-2	50	282	ACACB,TOMM5,BAP1,SLC25A5,BMF,BLOC1S2,ATP5F1D,ATP5F1E,ATP5MC2,ATP5MC3,ATP5ME,ATP5PO,BAD,BAX,IER3,AIP,CNP,TOMM7,PLEKHF1,CRYM,SLC25A10,DYNLL2,MUL1,FIS1,PAM16,RPL28,SLC8B1,TOMM40L,HAX1,ALKBH7,SIVA1,ATP5MG,SLC9A1,TIMM50,CYB5R1,SREBF1,SREBF2,STAT3,STARD3,PTPN5,U2AF2,TST,UCP2,HSPA1A,YWHAG,DNLZ,ZBTB17,FZD5,HPS4,RHOT2
GO: Cellular Component	GO:0030684	preribosome		7.385E-5	7.585E-2	1.649E-3	1.239E-2	18	70	NOB1,SNU13,RRP9,NOC4L,FBLL1,MRTO4,IMP3,RPLP0,RPLP1,RPLP2,FBL,EMG1,TBL3,PDCD11,RRP7A,BOP1,NOL6,RPSA
GO: Cellular Component	GO:0045202	synapse		9.234E-4	9.484E-1	1.650E-2	1.240E-1	111	870	ADORA2A,ADRA2A,GRK2,IGSF9,AKT1,NLGN2,DOC2B,MPST,LRFN1,GIT1,PPFIA4,CNIH2,HCN3,DBNL,PPFIA3,MT3,ATP1A3,NPAS4,MYH9,ADGRB1,HCN2,BCR,SYNGAP1,CDK5R1,BAIAP3,NOS1,CAD,NRGN,HAP1,NT5E,CAMK2B,GRASP,PEBP1,PALM,PCDH8,RAB11B,CHAT,CBARP,AP1S1,NRXN2,EPN1,HOMER3,MAPK8IP1,COMT,MINK1,ATP6V1G1,SLC32A1,CBLN4,NSMF,CTNNB1,CLSTN3,NDUFS7,LZTS3,SYT12,LRFN3,DBI,DBN1,SEMA4C,PTPRF,PTPRN,SV2A,NECTIN1,DLG4,DVL1,MAP1S,ENO1,ENO2,…
GO: Cellular Component	GO:0000502	proteasome complex		9.400E-4	9.653E-1	1.650E-2	1.240E-1	17	78	AMFR,AUP1,PSMA7,PSMB5,PSMB6,PSMB8,PSMB10,PSMC3,PSMD3,PSMD4,GET4,SYVN1,ADRM1,DNAJB2,HSPB1,WFS1,BAG6
GO: Cellular Component	GO:0032040	small-subunit processome		9.482E-4	9.738E-1	1.650E-2	1.240E-1	10	34	SNU13,RRP9,NOC4L,FBLL1,IMP3,FBL,EMG1,TBL3,PDCD11,NOL6
GO: Biological Process	GO:0022613	ribonucleoprotein complex biogenesis		7.059E-12	5.938E-8	1.650E-9	1.586E-8	94	468	WDR18,DHX37,NOB1,EIF3B,EIF3F,LSM2,EIF3I,SRSF9,RPL10A,BYSL,SNU13,RRP9,ABT1,NLE1,NOC4L,LSM4,TSR3,EXOSC4,MRM2,RPL36,DDX49,AAR2,CSNK1D,FBLL1,EIF4A3,PIH1D1,RAN,IPO4,MRPS7,MRTO4,IMP3,RPL3,RPL6,RPL7A,RPL8,RBFA,RPL11,RPL15,RPL18,MTG1,RPL27,RPL27A,RPL28,RPL31,RPL35A,RPL37,RPL37A,RPL39,RPL41,RPLP0,RPLP1,RPLP2,FBL,RPS2,RPS3,RPS4X,RPS5,RPS8,RPS9,RPS10,RPS12,RPS15,RPS15A,RPS16,RPS20,RPS21,RPS23,RPS26,RPS27A,R…
GO: Biological Process	GO:0043067	regulation of programmed cell death		3.771E-4	1.000E0	1.660E-2	1.596E-1	189	1536	MDK,MEN1,ADORA2A,AES,MIF,MAP3K10,AKT1,ALDH2,MNT,SLC25A5,BMF,CBX4,APOE,PDXK,RHOB,ARHGDIA,MT3,FLCN,CCAR2,ATF4,IRS2,HYAL2,HRK,AXL,PELI3,BAD,FADD,BAX,SYNGAP1,CDK5R1,IER3,SQSTM1,NFKBIA,NME2,NOS1,NOS3,NOTCH1,NOTCH2,CALR,CAMK2B,OGG1,CBS,CDC34,DEDD,CDKN1A,CDKN2D,PHB,TFPT,SLC9A3R1,PIM1,NLE1,CNTFR,BRMS1,MAPK8IP1,PLEKHF1,G0S2,POR,POU3F4,ZNF385A,KANK2,THOC6,PIM3,TRAF4,PTPA,NSMF,VSTM2L,DYNLL2,CST3,PRKCD,CTNNB…
GO: Biological Process	GO:0010647	positive regulation of cell communication		3.789E-4	1.000E0	1.660E-2	1.596E-1	205	1684	ACVR2B,MEN1,FZD8,ADORA2A,MFNG,ADRA2A,ADRA2C,MIF,MAP3K10,AKT1,C1QTNF1,NLGN2,ULK1,DOC2B,BMF,DBNL,RHOC,MT3,LAMTOR4,GLIPR2,FLCN,CCAR2,IRS2,VAMP8,HYAL2,HRK,AXL,PELI3,BAD,FADD,BAX,SQSTM1,NNAT,NOS1,NOTCH1,NOTCH2,CCN3,DIRAS1,NRGN,HAP1,CALR,CAMK2B,MAP3K6,TMED4,OXTR,PEBP1,FURIN,CD81,PCK2,ADGRG1,PHB,TAOK2,SLC9A3R1,NLE1,BAMBI,NENF,PLXNB1,MAPK8IP1,UBQLN2,DLL4,PLEKHF1,G0S2,MINK1,POR,ZNF385A,CRH,SH2B1,CARTPT,TR…
GO: Biological Process	GO:0033673	negative regulation of kinase activity		3.810E-4	1.000E0	1.661E-2	1.597E-1	45	275	MEN1,ADORA2A,MLLT1,AKT1,APOE,IRS2,HYAL2,CDKN1A,CDKN2D,MAPK8IP1,CSK,PRKCD,MAPK7,TESC,MVP,DUSP4,DUSP8,DVL1,FBXO31,SPRY2,SOCS7,RACK1,PPP1R1B,FEM1A,CIB1,SHB,HEXIM1,RGS14,ZGPAT,GADD45G,SRCIN1,PTPN5,GSTP1,SH3BP5L,PARK7,PIK3IP1,UCHL1,FLRT1,HSPB1,YWHAG,LRRTM1,LRRC4B,CAMK2N2,SPRY4,LRP5
GO: Biological Process	GO:0000184	nuclear-transcribed mRNA catabolic process, nonsense-mediated decay		2.345E-15	1.973E-11	1.686E-12	1.621E-11	44	121	RPL10A,RPL36,DHX34,EIF4A3,UPF1,RPL3,RPL6,RPL7A,RPL8,RPL11,RPL15,RPL18,RPL27,RPL27A,RPL28,RPL31,RPL35A,RPL37,RPL37A,RPL39,RPL41,RPLP0,RPLP1,RPLP2,RPS2,RPS3,RPS4X,RPS5,RPS8,RPS9,RPS10,RPS12,RPS15,RPS15A,RPS16,RPS20,RPS21,RPS23,RPS26,RPS27A,RPS28,RPS29,FAU,RPSA
GO: Biological Process	GO:0006413	translational initiation		2.667E-15	2.243E-11	1.686E-12	1.621E-11	58	194	ATF4,EIF3B,EIF3F,EIF3I,RPL10A,EIF2B4,EIF2B2,RPL36,PTBP1,EIF4EBP2,RPL3,RPL6,RPL7A,RPL8,RPL11,RPL15,RPL18,RPL27,RPL27A,RPL28,RPL31,RPL35A,RPL37,RPL37A,RPL39,RPL41,RPLP0,RPLP1,RPLP2,RPS2,RPS3,RPS4X,RPS5,RPS8,RPS9,RPS10,RPS12,RPS15,RPS15A,RPS16,RPS20,RPS21,RPS23,RPS26,RPS27A,RPS28,RPS29,RXRA,FAU,EIF3L,EIF1AD,AGO2,EIF3K,PPP1R15A,HSPB1,EIF4H,PAIP2B,RPSA
GO: Biological Process	GO:0006412	translation		2.719E-15	2.287E-11	1.686E-12	1.621E-11	131	667	MARS,MIF4GD,LRRC47,AKT1,SLC25A29,SLC25A5,ENC1,APEH,APLP1,GADD45GIP1,MRPL15,ATF4,EIF3B,EIF3F,EIF3I,RPL10A,EIF2B4,EIF2B2,SNU13,HAP1,CALR,SLC25A3,RPL36,ZNF385A,GTPBP1,PARS2,NCOR2,GTPBP2,SLC25A10,MAP2K2,EIF4A3,DAPK3,PTBP1,SLC25A38,AURKAIP1,CARS2,RAN,SLC25A42,MRPS16,UPF1,SLC25A51,DALRD3,MRPS18A,MRPL4,SLC25A22,MRPS7,EEF1B2,EEF2,EIF4EBP2,MRTO4,IMP3,RPL3,RPL6,RPL7A,RPL8,RPL11,RPL15,RPL18,MTG1,RPL27,RPL27…
GO: Biological Process	GO:0043043	peptide biosynthetic process		2.805E-15	2.360E-11	1.686E-12	1.621E-11	135	696	MARS,MIF4GD,LRRC47,AKT1,SLC25A29,SLC25A5,ENC1,APEH,APLP1,GADD45GIP1,MRPL15,ATF4,EIF3B,EIF3F,EIF3I,RPL10A,EIF2B4,EIF2B2,SNU13,HAP1,CALR,FURIN,SLC25A3,CHAC1,RPL36,ZNF385A,GTPBP1,PARS2,NCOR2,GTPBP2,SLC25A10,MAP2K2,EIF4A3,DAPK3,PTBP1,SLC25A38,AURKAIP1,CARS2,RAN,SLC25A42,MRPS16,UPF1,SLC25A51,DALRD3,MRPS18A,MRPL4,SLC25A22,MRPS7,EEF1B2,EEF2,EIF4EBP2,MRTO4,IMP3,RPL3,RPL6,RPL7A,RPL8,RPL11,RPL15,RPL18,MTG1…
GO: Cellular Component	GO:0015935	small ribosomal subunit		2.642E-11	2.713E-8	1.696E-9	1.274E-8	28	72	MRPS16,MRPS18A,MRPS7,IMP3,MRPS12,RPS2,RPS3,RPS4X,RPS5,RPS8,RPS9,RPS10,RPS12,RPS15,RPS15A,RPS16,RPS20,RPS21,RPS23,RPS26,RPS27A,RPS28,RPS29,FAU,RACK1,HBA2,MRPS24,RPSA
GO: Biological Process	GO:0015031	protein transport		1.169E-9	9.830E-6	1.703E-7	1.638E-6	268	1948	ACVR2B,TOMM5,ADCY5,BAP1,FZD1,ADORA2A,ADPRH,ADRA2A,ADRA2C,AP2A1,AP2A2,MIF,AKT1,NLGN2,KIF17,DOC2B,VPS18,SLC25A5,MCFD2,ANXA2,RANBP3,APOE,ARF3,ARL4D,ARF5,ARF6,RHOB,ARL2,MT3,RANGRF,SSNA1,IRS2,VAMP8,HYAL2,ATP6V1B2,MYH9,AUP1,BAD,RPL10A,CDK5R1,BSG,NFKBIA,NFKBIB,NFKBIL1,AP1M1,NNAT,NOS1,NOTCH1,NOTCH2,CCN3,CACNB1,SELENBP1,HAP1,CALR,OAZ1,AIP,OGG1,GRASP,TMED4,AP5B1,HGS,PALM,AP4M1,PCK2,ARHGAP33,CHMP1A,CDKN1A,R…
GO: Biological Process	GO:0046128	purine ribonucleoside metabolic process		1.174E-9	9.878E-6	1.703E-7	1.638E-6	73	361	ACACB,ADSL,MIF,AK1,ALDOA,MPP2,AMPD2,GADD45GIP1,UQCC3,FLCN,ATP5F1D,ATP5F1E,ATP5MC2,ATP5MC3,ATP5ME,ATP6V1B2,ATP5PO,BAD,NDUFA1,NDUFA2,NDUFA3,NDUFA6,NDUFA8,NDUFB2,NDUFB6,NDUFB7,NDUFB8,NDUFB10,NDUFV1,NDUFS6,NDUFS8,NDUFV3,IER3,NME2,NT5E,PFKL,UQCR10,NDUFB11,DDIT4,COX5B,NDUFS7,DLG4,PANK4,NME6,ENO1,ENO2,NUDT18,TCIRG1,SDHC,SIRT6,ATP5MG,OGDHL,UQCRQ,COASY,GALK1,GAMT,STAT3,NT5C1A,NDUFA12,SURF1,UQCR11,GPD1,MLY…
GO: Cellular Component	GO:0098803	respiratory chain complex		4.822E-9	4.952E-6	1.708E-7	1.283E-6	24	67	UQCC3,NDUFA1,NDUFA2,NDUFA3,NDUFA6,NDUFA8,NDUFB2,NDUFB6,NDUFB7,NDUFB8,NDUFB10,NDUFV1,NDUFS6,NDUFS8,NDUFV3,UQCR10,NDUFB11,NDUFS7,SDHB,SDHC,NDUFA12,PARK7,UQCRC1,NDUFA11
GO: Biological Process	GO:0042981	regulation of apoptotic process		3.954E-4	1.000E0	1.714E-2	1.648E-1	187	1519	MDK,MEN1,ADORA2A,AES,MIF,MAP3K10,AKT1,ALDH2,MNT,SLC25A5,BMF,CBX4,APOE,PDXK,RHOB,ARHGDIA,MT3,FLCN,CCAR2,ATF4,IRS2,HYAL2,HRK,AXL,PELI3,BAD,FADD,BAX,SYNGAP1,CDK5R1,IER3,SQSTM1,NFKBIA,NME2,NOS1,NOS3,NOTCH1,NOTCH2,CALR,CAMK2B,OGG1,CBS,CDC34,DEDD,CDKN1A,CDKN2D,PHB,TFPT,SLC9A3R1,PIM1,NLE1,CNTFR,BRMS1,MAPK8IP1,PLEKHF1,G0S2,POR,POU3F4,ZNF385A,THOC6,PIM3,TRAF4,PTPA,NSMF,VSTM2L,DYNLL2,PRKCD,CTNNB1,MAPK7,INT…
GO: Biological Process	GO:0043086	negative regulation of catalytic activity		4.005E-4	1.000E0	1.728E-2	1.661E-1	116	877	ACACB,PPP1R14A,LMTK3,ELFN2,MEN1,ADORA2A,ADRA2A,MLLT1,AKT1,ANXA2,APOE,ARL2,MT3,CCAR2,IRS2,HYAL2,C4B,NOS1,NOS3,NOTCH1,WFDC1,OAZ1,AIP,SERPINH1,CCNB1,PEBP1,FURIN,PALM,CDKN1A,CDKN2D,ANAPC2,NLE1,MAPK8IP1,POR,PPP1R8,PTPA,CSK,CST3,CSTB,PRKCD,MAPK7,PSMA7,INTS1,PSMB5,PSMB6,PSMB8,PSMB10,PSMC3,PSMD3,PSMD4,DBN1,NQO1,PPP1R37,TESC,PIH1D1,MVP,DUSP4,DUSP8,DVL1,PAM16,ECM1,NOSIP,RNH1,FBXO31,TNK2,SPRY2,WDR81,RPS27A,…
GO: Biological Process	GO:0097190	apoptotic signaling pathway		2.464E-5	2.072E-1	1.742E-3	1.674E-2	93	626	ADORA2A,MIF,AKT1,MNT,SLC25A5,BMF,BLOC1S2,FLCN,CCAR2,ATF4,HYAL2,HRK,PELI3,BAD,FADD,BAX,IER3,NOS3,CAMK2B,DEDD,CDKN1A,CDKN2D,TFPT,SLC9A3R1,NLE1,CHAC1,MAPK8IP1,DDIT4,PLEKHF1,G0S2,ZNF385A,CRH,CRIP1,DYNLL2,PRKCD,CTNNB1,MAPK7,PRODH,DAPK3,DAXX,TMEM161A,PIH1D1,MUL1,RAD9A,PDCD6,FIS1,PAM16,RET,EPHA2,RNF41,RPS3,RACK1,FGFR1,CX3CL1,AGAP2,MYBBP1A,CIB1,HYOU1,SIVA1,RBCK1,PIAS4,BEX3,TRIM32,TIMM50,SYVN1,FAIM2,SOD1,…
Disease	C0024668	Mammary Neoplasms, Experimental	DisGeNET Curated	2.244E-5	2.053E-1	1.746E-2	1.693E-1	30	155	MDH2,ADCY5,MIF,VAMP8,CCND1,DDR1,PEBP1,FURIN,PHB,G0S2,NSMF,SLC25A10,DBI,PTBP1,MRC2,RAN,RBP1,ENO1,RPL3,RPL6,SPINT2,STAT3,GNAI2,THRSP,TKT,UCP2,HRAS,ID1,ID3,TUBB2B
Disease	C0036572	Seizures	DisGeNET Curated	2.483E-5	2.271E-1	1.746E-2	1.693E-1	122	982	ACADS,ACY1,SLC12A5,MEN1,ADORA2A,MGAT1,ADSL,AKT1,ALAD,AMPD2,APOE,ARF6,MT3,ASL,JRK,FADD,FGFRL1,BCKDHA,CCND1,NDUFA1,NDUFA2,NDUFV1,NDUFS6,NDUFS8,SYNGAP1,EIF2B4,EIF2B2,CACNA1H,NOS1,CAD,NT5E,CBS,AP4M1,PDYN,PEX10,ADGRG1,CHAT,PIK3CD,PIK3R2,PEX16,GMPPB,NDUFB11,MPDU1,NDUFAF3,CRH,SH2B1,CSTB,PRKCD,CTBP1,CTNNB1,PRODH,PSAP,PHGDH,SV2A,PEX5,TESC,QDPR,MUL1,DPAGT1,SLC12A6,RET,ECM1,SEZ6L2,EGR3,RNF41,BSCL2,TCIRG1,RY…
Disease	C0026838	Muscle Spasticity	DisGeNET Curated	2.558E-5	2.340E-1	1.746E-2	1.693E-1	42	251	AMPD2,APOE,NDUFA1,NDUFA2,NDUFV1,NDUFS6,NDUFS8,SQSTM1,EIF2B4,EIF2B2,NOS3,NT5E,CHMP1A,PEX10,RCC1,PEX16,UBQLN2,NDUFAF3,DCTN1,PEX5,RFC2,BSCL2,ELN,STUB1,FOXG1,RNASEH2A,NPC2,SLC2A1,PEX26,FTL,GAA,SOD1,KIF1C,SPR,GFAP,MLC1,SURF1,ATP13A2,HSD17B10,CLIP2,GJC2,LIMK1
Disease	C0030232	Pallor	DisGeNET Curated	2.567E-5	2.348E-1	1.746E-2	1.693E-1	13	41	MEN1,AIP,RPL11,RPL15,RPL35A,RPS10,TCIRG1,RPS26,RPS28,RPS29,HBA2,HBB,UCP2
Disease	C0271441	Chronic otitis media	DisGeNET Curated	2.808E-5	2.568E-1	1.746E-2	1.693E-1	16	59	MYH9,CD81,COMT,SEC24C,PRKCD,RFC2,ELN,FLII,STAT3,TAP1,TAP2,TAPBP,GP1BB,TCF3,CLIP2,LIMK1
Disease	C0743359	ear infection chronic	DisGeNET Curated	2.863E-5	2.619E-1	1.746E-2	1.693E-1	15	53	CD81,COMT,SEC24C,PRKCD,RFC2,ELN,FLII,STAT3,TAP1,TAP2,TAPBP,GP1BB,TCF3,CLIP2,LIMK1
GO: Biological Process	GO:0009126	purine nucleoside monophosphate metabolic process		7.746E-12	6.516E-8	1.761E-9	1.693E-8	66	280	ADSL,MIF,AK1,ALDOA,MPP2,AMPD2,GADD45GIP1,UQCC3,FLCN,ATP5F1D,ATP5F1E,ATP5MC2,ATP5MC3,ATP5ME,ATP6V1B2,ATP5PO,BAD,NDUFA1,NDUFA2,NDUFA3,NDUFA6,NDUFA8,NDUFB2,NDUFB6,NDUFB7,NDUFB8,NDUFB10,NDUFV1,NDUFS6,NDUFS8,NDUFV3,IER3,NT5E,PFAS,PFKL,UQCR10,NDUFB11,DDIT4,COX5B,NDUFS7,DLG4,ENO1,ENO2,TCIRG1,SDHC,SIRT6,ATP5MG,OGDHL,UQCRQ,GALK1,GART,STAT3,NT5C1A,NDUFA12,SURF1,UQCR11,GPD1,GUK1,PARK7,UQCRC1,HSPA1A,HSPA1B,N…
GO: Biological Process	GO:0009206	purine ribonucleoside triphosphate biosynthetic process		4.129E-4	1.000E0	1.772E-2	1.704E-1	15	59	ALDOA,UQCC3,FLCN,ATP5F1D,ATP5F1E,ATP5MC2,ATP5MC3,ATP5ME,ATP5PO,NME2,NME6,TCIRG1,ATP5MG,STAT3,SURF1
GO: Biological Process	GO:0006614	SRP-dependent cotranslational protein targeting to membrane		2.115E-20	1.779E-16	1.779E-16	1.711E-15	44	94	RPL10A,SRPRB,RPL36,RPL3,RPL6,RPL7A,RPL8,RPL11,RPL15,RPL18,RPL27,RPL27A,RPL28,RPL31,RPL35A,RPL37,RPL37A,RPL39,RPL41,RPLP0,RPLP1,RPLP2,RPS2,RPS3,RPS4X,RPS5,RPS8,RPS9,RPS10,RPS12,RPS15,RPS15A,RPS16,RPS20,RPS21,RPS23,RPS26,RPS27A,RPS28,RPS29,FAU,SRP54,ZFAND2B,RPSA
GO: Biological Process	GO:0051962	positive regulation of nervous system development		4.224E-4	1.000E0	1.804E-2	1.734E-1	76	531	ADRA2C,MIF,NLGN2,FOXO6,ENC1,APOE,CPNE5,ARHGDIA,ADGRB1,NBL1,EIF2B2,NME2,MYRF,NOTCH1,HAP1,CAMK2B,OXTR,PALM,NUMBL,ANAPC2,NTN1,PLXNB1,NSMF,KDM4A,CTNNB1,MAP2K2,CLSTN3,DBN1,PTBP1,PTPRF,RNF10,MUL1,DVL1,RET,FBXO31,OLIG2,SEZ6,KATNB1,HMG20B,FES,FGFR1,BAIAP2,CX3CL1,FOXG1,RGS14,TRIM32,ZNF335,SMARCD3,SMO,NKX6-2,SPINT1,SRF,GFAP,MAPK8IP3,STK11,PRPF19,TCF3,OBSL1,GRN,PTPN5,TIMP2,LRRC24,LRTM2,PLXNB2,FLRT1,VIM,WNT2…
GO: Cellular Component	GO:0031428	box C/D snoRNP complex		1.063E-3	1.000E0	1.820E-2	1.367E-1	4	6	SNU13,RRP9,FBLL1,FBL
GO: Biological Process	GO:0043618	regulation of transcription from RNA polymerase II promoter in response to stress		2.654E-5	2.233E-1	1.846E-3	1.774E-2	18	64	MT3,ATF4,NOTCH1,ATF6B,MAPK7,EGLN2,RPS27A,KLF2,CITED2,HIF1AN,GCN1,ELOB,HIF3A,TMBIM6,PPP1R15A,UBC,HSPA5,JUN
GO: Biological Process	GO:0006986	response to unfolded protein		2.655E-5	2.233E-1	1.846E-3	1.774E-2	35	174	ACADVL,AMFR,ATF4,BAX,CCND1,CALR,SERPINH1,SRPRB,CHAC1,ATF6B,KLHDC3,DCTN1,CTDSP2,PDIA6,STUB1,CXXC1,TMEM129,RACK1,HYOU1,SYVN1,MYDGF,TMBIM6,TLN1,SEC61G,PPP1R15A,SDF2L1,DNAJB2,HSPA1A,HSPA5,HSPB1,HSPE1,WFS1,ZBTB17,MANF,LMNA
GO: Biological Process	GO:0007612	learning		4.388E-4	1.000E0	1.864E-2	1.793E-1	30	162	ADCY3,SLC12A5,ATP1A3,SYNGAP1,NPTX2,NRGN,NTS,PDE1B,NRXN2,COMT,CRH,RIN1,EIF4A3,DLG4,PPP1R1B,RGS14,SLC8A2,JPH4,SRF,C1QL1,STRA6,GRM4,MAPK8IP2,HRH3,RIC8A,HTR6,SHANK3,PAK6,JUN,BTG2
GO: Biological Process	GO:0043620	regulation of DNA-templated transcription in response to stress		2.774E-5	2.333E-1	1.913E-3	1.839E-2	19	70	MT3,ATF4,NOTCH1,ATF6B,MAPK7,EGLN2,RPS27A,KLF2,CITED2,HIF1AN,RGS14,GCN1,ELOB,HIF3A,TMBIM6,PPP1R15A,UBC,HSPA5,JUN
GO: Biological Process	GO:0043085	positive regulation of catalytic activity		4.567E-4	1.000E0	1.931E-2	1.856E-1	194	1588	ACVR2B,ADCY3,ADCY5,ADCYAP1R1,MEN1,FZD8,ADORA2A,ADPRH,ADRA2A,ADRA2C,MIF,MAP3K10,AKT1,ARHGEF37,MMP14,DOCK6,MMP15,MMP17,PREX1,ALOX5AP,ADCY4,GIT1,DBNL,APOE,SPTBN4,RHOC,RHOG,ARHGDIA,ARHGDIG,MT3,LAMTOR4,RANGRF,FLCN,IRS2,BAD,FADD,BAX,CCND1,BCR,SYNGAP1,CDK5R1,EIF2B4,EIF2B2,NOS1,NOS3,DIRAS1,CAMK2B,MAP3K6,CCNB1,CCND3,CD81,ARHGAP33,CDKN1A,RCC1,TAOK2,PIM1,PIK3R2,ANAPC2,PLCB2,PLXNB1,ARHGEF19,PLEKHG4,POR,TBC1D…
GO: Biological Process	GO:0055114	oxidation-reduction process		4.606E-4	1.000E0	1.937E-2	1.862E-1	129	996	ASPHD1,ACAA1,ACACB,ACADS,ACADVL,CYGB,MDH2,ADSL,AKT1,ALDH2,ALDOA,ALOX5AP,AOC2,AKR7A2,MT3,UQCC3,FLCN,IRS2,BAX,BCKDHA,NDUFA1,NDUFA2,NDUFA3,NDUFA6,NDUFA8,NDUFB2,NDUFB6,NDUFB7,NDUFB8,NDUFB10,NDUFV1,NDUFS6,NDUFS8,NDUFV3,BLVRB,NOS1,NOS3,CBR1,CBR3,CBS,PCK2,TBRG4,PFKL,UQCR10,GRHPR,PYCR2,SMOX,TXN2,PLOD1,NDUFB11,COX5B,POR,FADS6,CRYM,P4HTM,SLC25A10,CTBP1,KDM4A,PRODH,CYB561,CYBA,NDUFS7,DBI,RETSAT,PHGDH,NQO1,P…
GO: Biological Process	GO:0006613	cotranslational protein targeting to membrane		6.933E-19	5.832E-15	1.944E-15	1.869E-14	44	101	RPL10A,SRPRB,RPL36,RPL3,RPL6,RPL7A,RPL8,RPL11,RPL15,RPL18,RPL27,RPL27A,RPL28,RPL31,RPL35A,RPL37,RPL37A,RPL39,RPL41,RPLP0,RPLP1,RPLP2,RPS2,RPS3,RPS4X,RPS5,RPS8,RPS9,RPS10,RPS12,RPS15,RPS15A,RPS16,RPS20,RPS21,RPS23,RPS26,RPS27A,RPS28,RPS29,FAU,SRP54,ZFAND2B,RPSA
GO: Biological Process	GO:0030030	cell projection organization		4.701E-4	1.000E0	1.959E-2	1.884E-1	176	1423	GPRIN1,SLC12A5,ADORA2A,UNC5A,MIF,IGSF9,AKT1,NLGN2,ULK1,KIF17,PREX1,RSPH9,LRFN1,FOXO6,GIT1,ENC1,DBNL,APOE,CPNE5,BLOC1S2,ARF6,SPTBN4,RHOG,ARHGDIA,MT3,SSNA1,MYH9,ADGRB1,NBL1,SYNGAP1,CCDC13,CDK5R1,EIF2B2,WRAP73,NME2,NOTCH1,DDR1,HAP1,CAMK2B,PALM,NUMBL,CHAT,SLC9A3R1,ANAPC2,NTN1,PLXNA1,CNP,PLXNB1,MINK1,SH2B1,TBC1D13,TBC1D10B,NSMF,CSNK1D,CSPG4,PRKCD,PRKCSH,CROCC,MAP2K2,KIF26A,LRFN3,DBN1,PTBP1,PHGDH,SEMA4…
GO: Biological Process	GO:0060856	establishment of blood-brain barrier		4.705E-4	1.000E0	1.959E-2	1.884E-1	6	12	MXRA8,ADGRA2,CTNNB1,MFSD2A,WNT7A,WNT7B
GO: Molecular Function	GO:0016655	oxidoreductase activity, acting on NAD(P)H, quinone or similar compound as acceptor		4.660E-7	1.067E-3	1.974E-4	1.641E-3	20	60	NDUFA1,NDUFA2,NDUFA3,NDUFA6,NDUFA8,NDUFB2,NDUFB6,NDUFB7,NDUFB8,NDUFB10,NDUFV1,NDUFS6,NDUFS8,NDUFV3,CBR1,NDUFS7,NQO1,DCXR,DHRS4,NDUFA12
GO: Molecular Function	GO:0005112	Notch binding		5.175E-7	1.184E-3	1.974E-4	1.641E-3	11	20	NOTCH1,NOTCH4,CCN3,CHAC1,DLL4,NCOR2,DTX1,EGFL7,HIF1AN,JAG2,DLL1
GO: Cellular Component	GO:0030424	axon		9.137E-5	9.384E-2	1.997E-3	1.500E-2	82	567	LMTK3,ADORA2A,ADRA2C,GRK2,IGSF9,HCN3,BLOC1S2,SPTBN4,MT3,ATP1A3,HCN2,CDK5R1,EIF2B2,CCN3,CAD,NRGN,HAP1,NTS,PEBP1,PALM,PDYN,CHAT,AP1S1,EPN1,PNOC,MAPK8IP1,COMT,MINK1,CRH,SLC32A1,CST3,LRFN3,DBN1,PTPRN,PARD6A,SV2A,NECTIN1,PYGB,DLG4,MUL1,SLC12A6,RANGAP1,RAP1GAP,DVL1,TPGS1,RET,MYH14,SLC38A7,TNK2,KATNB1,WDR81,RXRA,RAPGEF3,FKBP4,CIB1,SMO,SOD1,GAD1,SARM1,BLOC1S1,NCDN,MAPK8IP3,C1QL1,SRCIN1,GRM4,NCS1,PTPN5,TN…
GO: Cellular Component	GO:0005840	ribosome		5.856E-18	6.014E-15	2.005E-15	1.506E-14	69	235	GADD45GIP1,MT3,MRPL15,JRK,RPL10A,SNU13,RPL36,MRPS16,MRPS18A,MRPL4,MRPS7,EEF2,MRTO4,IMP3,RPL3,RPL6,RPL7A,RPL8,RPL11,RPL15,RPL18,MTG1,RPL27,RPL27A,RPL28,RPL31,RPL35A,RPL36AL,RPL37,RPL37A,RPL39,RPL41,RPLP0,RPLP1,RPLP2,MRPL12,MRPS12,RPS2,RPS3,RPS4X,RPS5,RPS8,RPS9,RPS10,RPS12,MRPL27,RPS15,RPS15A,RPS16,RPS20,RPS21,RPS23,RPS26,RPS27A,RPS28,RPS29,FAU,RACK1,MRPL28,NHP2,MRPL17,GCN1,HBA2,MRPL14,MRPS24,MRPL3…
GO: Molecular Function	GO:0003735	structural constituent of ribosome		8.770E-20	2.007E-16	2.007E-16	1.669E-15	69	216	SLC25A29,SLC25A5,MRPL15,RPL10A,SLC25A3,RPL36,SLC25A10,SLC25A38,SLC25A42,MRPS16,SLC25A51,MRPS18A,MRPL4,SLC25A22,MRPS7,MRTO4,IMP3,RPL3,RPL6,RPL7A,RPL8,RPL11,RPL15,RPL18,RPL27,RPL27A,RPL28,RPL31,RPL35A,RPL36AL,RPL37,RPL37A,RPL39,RPL41,RPLP0,RPLP1,RPLP2,MRPL12,MRPS12,RPS2,RPS3,RPS4X,RPS5,SLC25A34,RPS8,RPS9,RPS10,RPS12,MRPL27,RPS15,RPS15A,RPS16,RPS20,RPS21,RPS23,RPS26,RPS27A,RPS28,RPS29,FAU,MRPL28,MRP…
GO: Biological Process	GO:0006091	generation of precursor metabolites and energy		2.952E-5	2.483E-1	2.019E-3	1.941E-2	64	393	ACADVL,MDH2,ADSL,MIF,AKT1,ALDOA,GADD45GIP1,MT3,UQCC3,FLCN,IRS2,ATP5F1D,BAX,NDUFA1,NDUFA2,NDUFA3,NDUFA6,NDUFA8,NDUFB2,NDUFB6,NDUFB7,NDUFB8,NDUFB10,NDUFV1,NDUFS6,NDUFS8,NDUFV3,IER3,TBRG4,PFKL,UQCR10,SLC25A3,NDUFB11,DDIT4,COX5B,CYB561,NDUFS7,PYGB,SCO2,COX17,STK40,ENO1,ENO2,NHLRC1,RPS27A,SDHB,SDHC,MYBBP1A,SIRT6,OGDHL,UQCRQ,GAA,GALK1,BLOC1S1,STAT3,NDUFA12,SURF1,UQCR11,GPD1,PARK7,UBC,UQCRC1,VGF,NDUFA11
GO: Biological Process	GO:0072599	establishment of protein localization to endoplasmic reticulum		9.646E-19	8.114E-15	2.029E-15	1.950E-14	45	106	RPL10A,SRPRB,RPL36,RPL3,RPL6,RPL7A,RPL8,RPL11,RPL15,RPL18,RPL27,RPL27A,RPL28,RPL31,RPL35A,RPL37,RPL37A,RPL39,RPL41,RPLP0,RPLP1,RPLP2,RPS2,RPS3,RPS4X,RPS5,RPS8,RPS9,RPS10,RPS12,RPS15,RPS15A,RPS16,RPS20,RPS21,RPS23,RPS26,RPS27A,RPS28,RPS29,FAU,SRP54,SEC61G,ZFAND2B,RPSA
GO: Biological Process	GO:2001233	regulation of apoptotic signaling pathway		2.991E-5	2.516E-1	2.029E-3	1.951E-2	66	409	ADORA2A,MIF,AKT1,MNT,SLC25A5,BMF,FLCN,CCAR2,HYAL2,HRK,PELI3,BAD,FADD,BAX,IER3,NOS3,CAMK2B,CDKN2D,SLC9A3R1,NLE1,MAPK8IP1,PLEKHF1,G0S2,ZNF385A,DYNLL2,PRKCD,CTNNB1,MAPK7,DAPK3,DAXX,TMEM161A,PIH1D1,MUL1,RAD9A,FIS1,PAM16,RET,RPS3,RACK1,FGFR1,CX3CL1,AGAP2,HYOU1,SIVA1,RBCK1,PIAS4,TRIM32,SYVN1,FAIM2,SOD1,STX4,ERP29,GRINA,TMBIM6,GSN,GSTP1,TPT1,PARK7,HSPA1A,HSPA1B,HSPB1,WFS1,YWHAG,JAK3,ITM2C,LMNA
GO: Cellular Component	GO:0005759	mitochondrial matrix		9.497E-5	9.754E-2	2.032E-3	1.526E-2	65	425	CLPP,ACADS,ACADVL,MDH2,ALDH2,SLC25A5,GADD45GIP1,ARL2,MRPL15,NUDT1,CCAR2,ATP5F1D,ATP5F1E,BCAT2,BCKDHA,NDUFS8,PCK2,PYCR2,TXN2,POLRMT,PARS2,PRODH,NDUFS7,SARDH,CARS2,CHPF,SCO2,MRPS16,PAM16,MRPS18A,MRPS7,MTG1,GLRX5,MRPL12,MRPS12,RPS3,MRPL27,ALKBH7,FPGS,SHMT2,MRPL28,MRPL17,GRPEL1,OGDHL,COASY,SOD1,BLOC1S1,GCSH,ACOT2,MLYCD,HSD17B10,HADH,ARL2BP,PARK7,HMGCL,TST,TUFM,HSPE1,TWNK,MRPS24,MRPL38,MRPL9,IBA57,IVD…
GO: Biological Process	GO:0009145	purine nucleoside triphosphate biosynthetic process		5.015E-4	1.000E0	2.078E-2	1.998E-1	15	60	ALDOA,UQCC3,FLCN,ATP5F1D,ATP5F1E,ATP5MC2,ATP5MC3,ATP5ME,ATP5PO,NME2,NME6,TCIRG1,ATP5MG,STAT3,SURF1
GO: Cellular Component	GO:0031252	cell leading edge		1.243E-3	1.000E0	2.093E-2	1.573E-1	56	389	SLC12A5,ADORA2A,UNC5A,ANXA2,DBNL,ARF6,ATF4,ATP6V1B2,MYH9,HCN2,LDB1,NME2,PALM,SLC9A3R1,SH2B1,CSPG4,CTNNB1,PIEZO1,DBN1,DCTN1,PARD6A,TESC,RAC3,EPHA2,RASGRP2,SPRY2,ABI3,RPS3,APC2,RAPGEF3,HAX1,BAIAP2,CDC42BPG,CIB1,ASAP3,SLC9A1,FSCN1,INPP5J,DDN,MAPK8IP3,STX4,CARMIL2,SRCIN1,GSN,CDC37,TLN1,SCRIB,ARFIP2,AMOTL1,VASP,VIM,ITGA5,ITGB4,ITGB5,SPRY4,SPATA13
GO: Biological Process	GO:0006414	translational elongation		3.124E-5	2.628E-1	2.103E-3	2.021E-2	29	134	GADD45GIP1,MRPL15,GTPBP1,GTPBP2,EIF4A3,AURKAIP1,MRPS16,MRPS18A,MRPL4,MRPS7,EEF1B2,EEF2,IMP3,RPLP1,RPLP2,MRPL12,MRPS12,RPS5,RPS9,MRPL27,MRPL28,MRPL17,TUFM,MRPL14,MRPS24,MRPL38,MRPL9,MRPL52,VARS2
GO: Biological Process	GO:0006754	ATP biosynthetic process		5.120E-4	1.000E0	2.111E-2	2.030E-1	13	48	ALDOA,UQCC3,FLCN,ATP5F1D,ATP5F1E,ATP5MC2,ATP5MC3,ATP5ME,ATP5PO,TCIRG1,ATP5MG,STAT3,SURF1
GO: Biological Process	GO:0051259	protein complex oligomerization		3.162E-5	2.660E-1	2.111E-3	2.030E-2	82	539	CLPP,KCTD13,ACACB,ACADS,HIST1H4I,ADSL,HIST1H4A,HIST1H4D,HIST1H4F,HIST1H4C,HIST1H4H,MIF,C1QTNF1,ALAD,ALDOA,ALOX5AP,AMFR,ANXA2,BMF,ASL,HRK,FADD,BAX,FGFRL1,SQSTM1,NME2,PFKL,GRHPR,KCTD15,DCTPP1,COL1A2,COL6A2,PPP5C,SCUBE3,PRKCSH,CTNNB1,LZTS3,KEAP1,PEX5,DPAGT1,DVL2,FIS1,TMEM120A,TRIM28,KCTD10,DCXR,RXRA,RXRG,RACK1,MIEF2,SHMT2,SLC9A1,TYSND1,STK11,GJB1,DHRS4,MLC1,EHD1,GNA11,TGM2,HSD17B10,TNFRSF1A,HBA2,HBB…
GO: Biological Process	GO:0009124	nucleoside monophosphate biosynthetic process		2.399E-6	2.018E-2	2.124E-4	2.042E-3	25	94	ADSL,AK1,ALDOA,AMPD2,UQCC3,FLCN,ATP5F1D,ATP5F1E,ATP5MC2,ATP5MC3,ATP5ME,ATP5PO,CAD,PFAS,UCK1,UCKL1,TCIRG1,ATP5MG,GART,STAT3,SURF1,UMPS,IMPDH1,IMPDH2,ADSSL1
GO: Biological Process	GO:0009260	ribonucleotide biosynthetic process		2.430E-6	2.044E-2	2.129E-4	2.047E-3	51	268	ACACB,ADCY3,ADCY5,ADCYAP1R1,ADORA2A,ADRA2A,ADSL,AK1,ALDOA,AMPD2,ADCY4,APLP1,APOE,UQCC3,FLCN,ATP5F1D,ATP5F1E,ATP5MC2,ATP5MC3,ATP5ME,ATP5PO,NME2,NOS1,NOS3,CAD,PALM,PFAS,CRH,UCK1,UCKL1,PANK4,NME6,RAMP2,TCIRG1,ATP5MG,COASY,GART,STAT3,RUNDC3A,SURF1,GNAI2,GNG7,TIMP2,GUK1,HRH3,UMPS,HTR1B,WFS1,IMPDH1,IMPDH2,ADSSL1
GO: Biological Process	GO:0006520	cellular amino acid metabolic process		3.217E-5	2.706E-1	2.131E-3	2.049E-2	65	402	MARS,ACY1,LRRC47,MPST,ASL,ATF4,BCAT2,BCKDHA,EIF2B4,EIF2B2,NOS1,NOS3,CAD,OAZ1,CBS,KYAT1,PFAS,CKB,PYCR2,PLOD1,COMT,PARS2,CRYM,PRODH,EIF4A3,PSMA7,PSMB5,PSMB6,PSMB8,PSMB10,PSMC3,PSMD3,PSMD4,PHGDH,NQO1,SARDH,CARS2,QDPR,EGLN2,ASPG,DALRD3,FARSA,FPGS,SHMT2,SLC7A4,SLC19A1,GAD1,GAMT,SPR,GART,SLC46A1,ALDH1L1,GCSH,GGT5,ICMT,HSD17B10,PARK7,HMGCL,WARS,ATCAY,IVD,PYCR3,ADSSL1,AIMP2,VARS2
GO: Cellular Component	GO:0030055	cell-substrate junction		1.660E-12	1.705E-9	2.132E-10	1.601E-9	85	403	FZD1,MMP14,GIT1,ARF6,RHOB,RHOG,MYH9,RPL10A,BSG,NME2,CALR,CCND3,CD81,CD151,SLC9A3R2,PIK3R2,ZFYVE21,PLEC,CNN2,CSPG4,CSRP2,CTNNB1,MAP2K2,CYBA,TES,KEAP1,MRC2,ARPC1B,EPHA2,RPL3,RPL6,RPL7A,RPL8,RPL18,RPL27,RPL31,RPL37A,RPLP0,RPLP1,RPLP2,RPS2,RPS3,RPS4X,RPS5,RPS8,RPS9,RPS10,RPS15,RPS16,RPS29,FES,SDC4,FLII,ITGA11,HYOU1,ASAP3,LIMS2,SLC9A1,FZD2,PDLIM2,TRIOBP,TNS2,SRCIN1,GSN,CDC42EP1,TGM2,TLN1,TSPAN4,HMGA1,…
GO: Cellular Component	GO:0043198	dendritic shaft		1.288E-3	1.000E0	2.133E-2	1.603E-1	14	60	SLC12A5,GRK2,NLGN2,PREX1,CNIH2,HCN2,SYNGAP1,CTNNB1,DBN1,KIRREL1,SEZ6,INPP5J,JPH4,GRM4
GO: Biological Process	GO:0046700	heterocycle catabolic process		6.853E-13	5.765E-9	2.135E-10	2.053E-9	96	464	MGAT1,MIF,KHSRP,NUDT1,LSM2,BAX,RPL10A,BLVRB,IER3,NT5E,NTHL1,OGG1,KYAT1,PDE1B,LSM4,DCTPP1,EXOSC4,CNP,DDIT4,RPL36,GTPBP1,PPP1R8,GTPBP2,MAPK7,DHX34,PRODH,EIF4A3,PTBP1,DFFA,CANT1,DNASE2,DXO,UPF1,RNH1,MRTO4,ENDOG,RPL3,RPL6,RPL7A,RPL8,RPL11,RPL15,RPL18,NUDT18,RPL27,RPL27A,RPL28,RPL31,RPL35A,RPL37,RPL37A,RPL39,RPL41,RPLP0,RPLP1,RPLP2,RPS2,RPS3,RPS4X,RPS5,RPS8,RPS9,RPS10,RPS12,RPS15,RPS15A,RPS16,RPS20,RP…
GO: Biological Process	GO:0022900	electron transport chain		1.779E-8	1.496E-4	2.137E-6	2.055E-5	31	107	UQCC3,NDUFA1,NDUFA2,NDUFA3,NDUFA6,NDUFA8,NDUFB2,NDUFB6,NDUFB7,NDUFB8,NDUFB10,NDUFV1,NDUFS6,NDUFS8,NDUFV3,UQCR10,NDUFB11,COX5B,CYB561,NDUFS7,SCO2,SDHB,SDHC,MYBBP1A,UQCRQ,NDUFA12,UQCR11,GPD1,PARK7,UQCRC1,NDUFA11
GO: Biological Process	GO:0007611	learning or memory		5.212E-4	1.000E0	2.139E-2	2.056E-1	44	271	MDK,ADCY3,SLC12A5,AMFR,FOXO6,ATP1A3,SYNGAP1,NPTX2,NRGN,NTS,OXTR,PDE1B,CHAT,NRXN2,COMT,ZNF385A,CRH,RIN1,EIF4A3,DBI,DLG4,EIF4EBP2,PPP1R1B,FEN1,RGS14,SLC8A2,JPH4,SRF,C1QL1,EHMT2,STRA6,GRM4,THRA,MAPK8IP2,HRH3,RIC8A,HTR6,SHANK3,PAK6,ITGA5,ITPR3,JUN,BTG2,LAMB1
GO: Biological Process	GO:0034660	ncRNA metabolic process		7.198E-13	6.055E-9	2.163E-10	2.079E-9	110	563	MARS,WDR18,LRRC47,METTL1,DHX37,NOB1,KHSRP,RPL10A,BYSL,SNU13,RRP9,DEDD,TRMT61A,ABT1,TSEN34,CPSF1,NOC4L,TSR3,EXOSC4,MRM2,RPL36,DDX49,POLR2E,POLR2I,POLR2K,POLR2L,PARS2,CSNK1D,FBLL1,EIF4A3,INTS1,INTS11,CARS2,PIH1D1,DALRD3,MRTO4,IMP3,RPL3,RPL6,RPL7A,RPL8,RBFA,RPL11,RPL15,RPL18,RPL27,RPL27A,RPL28,RPL31,RPL35A,RPL37,RPL37A,RPL39,RPL41,RPLP0,RPLP1,RPLP2,FBL,RPS2,RPS3,RPS4X,RPS5,RPS8,RPS9,RPS10,RPS12,RPS1…
GO: Biological Process	GO:1901566	organonitrogen compound biosynthetic process		1.546E-17	1.300E-13	2.167E-14	2.084E-13	240	1444	ACACB,MARS,MIF4GD,ADCY3,ADCY5,ADCYAP1R1,LRRC47,ADORA2A,ADRA2A,ADSL,AP2A1,AK1,AKT1,ALAD,SLC25A29,ALDOA,AMPD2,ADCY4,SLC25A5,ENC1,NDST2,APEH,APLP1,CHST1,APOE,GADD45GIP1,PDXK,MRPL15,ORMDL2,UQCC3,ASL,FLCN,ATF4,EIF3B,EIF3F,EIF3I,ATP5F1D,ATP5F1E,ATP5MC2,ATP5MC3,ATP5ME,ATP5PO,BCAT2,RPL10A,NFE2L1,EIF2B4,EIF2B2,SNU13,NME2,NOS1,NOS3,CAD,HAP1,CALR,NT5E,OAZ1,CBS,KYAT1,CCND3,FURIN,PALM,PFAS,CHAT,SLC25A3,PYCR2,…
GO: Cellular Component	GO:0031966	mitochondrial membrane		3.609E-11	3.707E-8	2.180E-9	1.638E-8	121	694	ACACB,ACADS,ACADVL,MDH2,TOMM5,SLC25A29,MPST,SLC25A5,BMF,MT3,MRPL15,UQCC3,ASL,ATP5F1D,ATP5F1E,ATP5MC2,ATP5MC3,ATP5ME,ATP5PO,CDS2,BAD,BAX,NDUFA1,NDUFA2,NDUFA3,NDUFA6,NDUFA8,NDUFB2,NDUFB6,NDUFB7,NDUFB8,NDUFB10,NDUFV1,NDUFS6,NDUFS8,NDUFV3,NME2,NOS1,NRGN,PEBP1,UQCR10,PHB,SLC25A3,CNP,MAPK8IP1,NDUFB11,TOMM7,COX5B,NDUFAF3,SLC25A10,PRODH,ROMO1,NDUFS7,SLC25A38,AURKAIP1,DMPK,MUL1,SCO2,SLC25A42,NLRX1,MRPS16,…
GO: Biological Process	GO:0009201	ribonucleoside triphosphate biosynthetic process		3.339E-5	2.809E-1	2.189E-3	2.105E-2	18	65	ALDOA,UQCC3,FLCN,ATP5F1D,ATP5F1E,ATP5MC2,ATP5MC3,ATP5ME,ATP5PO,NME2,CAD,UCK1,UCKL1,NME6,TCIRG1,ATP5MG,STAT3,SURF1
GO: Biological Process	GO:0044092	negative regulation of molecular function		3.357E-5	2.824E-1	2.189E-3	2.105E-2	154	1157	ACACB,PPP1R14A,LMTK3,ELFN2,MEN1,ADORA2A,ADRA2A,AES,MAP3K10,MLLT1,AKT1,ANXA2,APOE,ARL2,MT3,CCAR2,IRS2,HYAL2,BAX,NFKBIA,EIF2B4,NFKBIL1,C4B,NOS1,NOS3,NOTCH1,WFDC1,OAZ1,AIP,SERPINH1,CCNB1,PEBP1,FURIN,PALM,CDKN1A,CDKN2D,CBARP,CACTIN,SLC9A3R1,PIM1,ANAPC2,NLE1,BRMS1,MAPK8IP1,POR,PPP1R8,PTPA,CSK,CST3,CSTB,PRKCD,MAPK7,EIF4A3,PSMA7,INTS1,PSMB5,PSMB6,PSMB8,PSMB10,PSMC3,PSMD3,PSMD4,KEAP1,DBN1,PTPRF,NQO1,PPP1…
GO: Biological Process	GO:0034655	nucleobase-containing compound catabolic process		4.751E-14	3.997E-10	2.220E-11	2.135E-10	92	418	MGAT1,MIF,KHSRP,NUDT1,LSM2,BAX,RPL10A,IER3,NT5E,NTHL1,OGG1,PDE1B,LSM4,DCTPP1,EXOSC4,CNP,DDIT4,RPL36,GTPBP1,PPP1R8,GTPBP2,MAPK7,DHX34,EIF4A3,PTBP1,DFFA,CANT1,DNASE2,DXO,UPF1,RNH1,MRTO4,ENDOG,RPL3,RPL6,RPL7A,RPL8,RPL11,RPL15,RPL18,NUDT18,RPL27,RPL27A,RPL28,RPL31,RPL35A,RPL37,RPL37A,RPL39,RPL41,RPLP0,RPLP1,RPLP2,RPS2,RPS3,RPS4X,RPS5,RPS8,RPS9,RPS10,RPS12,RPS15,RPS15A,RPS16,RPS20,RPS21,RPS23,RPS26,RP…
GO: Cellular Component	GO:0070161	anchoring junction		1.983E-12	2.036E-9	2.226E-10	1.672E-9	99	503	FZD1,MMP14,GIT1,ARF6,SPTBN4,RHOB,RHOG,MYH9,RPL10A,BSG,NME2,NOTCH1,CALR,CCND3,OXTR,CD81,CD151,SLC9A3R2,PIK3R2,ZFYVE21,PLEC,CNN2,CSPG4,CSRP2,CTNNB1,MAP2K2,CYBA,TES,KEAP1,MRC2,NECTIN1,ARPC1B,EPHA2,TNK2,RPL3,RPL6,RPL7A,RPL8,RPL18,RPL27,RPL31,RPL37A,RPLP0,RPLP1,RPLP2,RPS2,RPS3,RPS4X,RPS5,RPS8,RPS9,RPS10,RPS15,RPS16,RPS29,FES,SDC4,FLII,ITGA11,HYOU1,TCHP,ASAP3,LIMS2,SLC9A1,FZD2,PERP,KAZN,PDLIM2,TRIOBP,T…
GO: Cellular Component	GO:0005924	cell-substrate adherens junction		2.168E-12	2.226E-9	2.226E-10	1.672E-9	84	398	FZD1,MMP14,GIT1,ARF6,RHOB,RHOG,MYH9,RPL10A,BSG,NME2,CALR,CCND3,CD81,CD151,SLC9A3R2,PIK3R2,ZFYVE21,PLEC,CNN2,CSPG4,CSRP2,CTNNB1,MAP2K2,CYBA,TES,KEAP1,MRC2,ARPC1B,EPHA2,RPL3,RPL6,RPL7A,RPL8,RPL18,RPL27,RPL31,RPL37A,RPLP0,RPLP1,RPLP2,RPS2,RPS3,RPS4X,RPS5,RPS8,RPS9,RPS10,RPS15,RPS16,RPS29,FES,SDC4,FLII,ITGA11,HYOU1,ASAP3,LIMS2,SLC9A1,FZD2,PDLIM2,TRIOBP,TNS2,SRCIN1,GSN,CDC42EP1,TGM2,TLN1,TSPAN4,HMGA1,…
GO: Biological Process	GO:0061024	membrane organization		1.570E-9	1.321E-5	2.239E-7	2.153E-6	167	1091	ADPRH,MFGE8,AKT1,NLGN2,DOC2B,VPS18,SLC25A5,MCFD2,ANXA2,CNIH2,BMF,LEMD2,APOE,BLOC1S2,ARF6,SPTBN4,RHOG,MT3,UQCC3,RANGRF,SSNA1,DCHS1,VAMP8,HYAL2,MYH9,BAD,BAX,BANF1,SYNGAP1,RPL10A,CDK5R1,IER3,BSG,MYRF,CACNB1,CCNB1,HGS,PALM,CHMP1A,RAB11B,SRPRB,TAOK2,AP2S1,SLC9A3R1,NRXN2,PIK3R2,PEX16,CNP,TRAPPC6A,TOMM7,RPL36,PLEKHF1,TBC1D13,TBC1D10B,SYNE3,SEC24C,CSK,CSNK1D,DYNLL2,CALY,PRKCD,TMED9,SYT12,DBN1,PEX5,DLG4,T…
GO: Cellular Component	GO:0044463	cell projection part		1.385E-3	1.000E0	2.257E-2	1.695E-1	139	1139	GPRIN1,SLC12A5,ADORA2A,UNC5A,ADRA2C,GRK2,AP2A1,AK1,AKT1,NLGN2,ALDOA,KIF17,PREX1,RSPH9,AMFR,CNIH2,HCN3,BLOC1S2,ARF6,SPTBN4,MT3,SSNA1,ATF4,ATP1A3,HCN2,SYNGAP1,CDK5R1,SQSTM1,SLC5A6,WRAP73,NOS1,CAD,NRGN,HAP1,CAMK2B,NTS,PEBP1,PALM,PDYN,CBARP,AP1S1,SLC9A3R1,EPN1,PNOC,MAPK8IP1,SPEF1,COMT,CRH,SLC32A1,PPP5C,CSPG4,DYNLL2,CTNNB1,CROCC,CLSTN3,LZTS3,PIEZO1,DBN1,PTBP1,PTH1R,PTPRF,PTPRN,PARD6A,SV2A,NECTIN1,KIF1…
GO: Biological Process	GO:0051130	positive regulation of cellular component organization		5.540E-4	1.000E0	2.262E-2	2.175E-1	158	1263	BAP1,MEN1,MFGE8,MIF,AKT1,NLGN2,PREX1,DOC2B,FOXO6,ANXA2,BMF,ENC1,APOE,CPNE5,ARF6,RHOG,ARHGDIA,ARL2,RANGRF,FHOD1,GLIPR2,BCL9L,HRK,AXL,BAD,ADGRB1,BAX,BCR,CDK5R1,NFATC2,EIF2B2,WRAP73,C4B,NME2,NOS1,NOTCH1,HAP1,CALR,CAMK2B,CCNB1,OXTR,PEBP1,PALM,CDC34,NUMBL,ANAPC2,BAMBI,NTN1,PLXNB1,TOMM7,SH2B1,DYNLL2,CALY,PRKCD,TMED9,CTBP1,CTNNB1,MAP2K2,CYBA,CLSTN3,PIEZO1,PSMC3,DAXX,DBN1,PTBP1,PTPRF,PIH1D1,MUL1,RAC3,RAP…
GO: Biological Process	GO:0060548	negative regulation of cell death		5.631E-4	1.000E0	2.288E-2	2.200E-1	129	1001	MDK,ADCYAP1R1,ADORA2A,MIF,AKT1,ALDH2,MNT,SLC25A5,MCFD2,BMF,CBX4,APOE,PDXK,ARHGDIA,MT3,CCAR2,ATF4,IRS2,AXL,PELI3,BAD,FADD,BAX,SYNGAP1,IER3,SQSTM1,NFKBIA,NME2,NOS1,NOS3,NOTCH1,NOTCH2,CCN3,OGG1,CBS,CDKN1A,CDKN2D,PHB,PIM1,NLE1,CNTFR,MAPK8IP1,POR,POU3F4,ZNF385A,KANK2,CRH,THOC6,PIM3,PPP5C,VSTM2L,CST3,PRKCD,KDM4A,CTNNB1,MAPK7,PSAP,INTS1,DAXX,DFFA,TMEM161A,NQO1,PIH1D1,RARG,TSC22D3,PAM16,EGR3,STK40,SPRY2,…
GO: Cellular Component	GO:0044429	mitochondrial part		4.309E-10	4.425E-7	2.329E-8	1.750E-7	154	987	CLPP,ACACB,ACADS,ACADVL,MDH2,TOMM5,ALDH2,SLC25A29,MPST,SLC25A5,BMF,GADD45GIP1,ARL2,MT3,MRPL15,UQCC3,NUDT1,ASL,CCAR2,ATP5F1D,ATP5F1E,ATP5MC2,ATP5MC3,ATP5ME,ATP5PO,CDS2,BAD,BAX,BCAT2,BCKDHA,NDUFA1,NDUFA2,NDUFA3,NDUFA6,NDUFA8,NDUFB2,NDUFB6,NDUFB7,NDUFB8,NDUFB10,NDUFV1,NDUFS6,NDUFS8,NDUFV3,NME2,NOS1,NRGN,PEBP1,PCK2,UQCR10,PHB,SLC25A3,PYCR2,TXN2,CNP,MAPK8IP1,NDUFB11,TOMM7,COX5B,NDUFAF3,POLRMT,PARS2,SL…
GO: Biological Process	GO:0042278	purine nucleoside metabolic process		1.716E-9	1.444E-5	2.379E-7	2.287E-6	73	364	ACACB,ADSL,MIF,AK1,ALDOA,MPP2,AMPD2,GADD45GIP1,UQCC3,FLCN,ATP5F1D,ATP5F1E,ATP5MC2,ATP5MC3,ATP5ME,ATP6V1B2,ATP5PO,BAD,NDUFA1,NDUFA2,NDUFA3,NDUFA6,NDUFA8,NDUFB2,NDUFB6,NDUFB7,NDUFB8,NDUFB10,NDUFV1,NDUFS6,NDUFS8,NDUFV3,IER3,NME2,NT5E,PFKL,UQCR10,NDUFB11,DDIT4,COX5B,NDUFS7,DLG4,PANK4,NME6,ENO1,ENO2,NUDT18,TCIRG1,SDHC,SIRT6,ATP5MG,OGDHL,UQCRQ,COASY,GALK1,GAMT,STAT3,NT5C1A,NDUFA12,SURF1,UQCR11,GPD1,MLY…
GO: Biological Process	GO:0009141	nucleoside triphosphate metabolic process		1.725E-9	1.451E-5	2.379E-7	2.287E-6	63	295	MIF,AK1,ALDOA,AMPD2,GADD45GIP1,UQCC3,NUDT1,FLCN,ATP5F1D,ATP5F1E,ATP5MC2,ATP5MC3,ATP5ME,ATP6V1B2,ATP5PO,BAD,NDUFA1,NDUFA2,NDUFA3,NDUFA6,NDUFA8,NDUFB2,NDUFB6,NDUFB7,NDUFB8,NDUFB10,NDUFV1,NDUFS6,NDUFS8,NDUFV3,IER3,NME2,CAD,PFKL,UQCR10,DCTPP1,NDUFB11,DDIT4,COX5B,NDUFS7,UCK1,UCKL1,NME6,ENO1,ENO2,TCIRG1,SDHC,SIRT6,ATP5MG,OGDHL,UQCRQ,GALK1,STAT3,NDUFA12,SURF1,UQCR11,GPD1,GUK1,PARK7,UQCRC1,HSPA1A,HSPA1B,…
GO: Biological Process	GO:0043604	amide biosynthetic process		4.327E-15	3.640E-11	2.426E-12	2.333E-11	146	780	MARS,MIF4GD,LRRC47,AKT1,SLC25A29,SLC25A5,ENC1,APEH,APLP1,GADD45GIP1,MRPL15,ORMDL2,ASL,ATF4,EIF3B,EIF3F,EIF3I,RPL10A,EIF2B4,EIF2B2,SNU13,CAD,HAP1,CALR,FURIN,SLC25A3,CHAC1,RPL36,ZNF385A,GTPBP1,PARS2,NCOR2,GTPBP2,SLC25A10,PRKCD,MAP2K2,EIF4A3,DAPK3,PTBP1,SLC25A38,AURKAIP1,CARS2,FAM57B,RAN,SLC25A42,MRPS16,UPF1,SLC25A51,DALRD3,MRPS18A,MRPL4,SLC25A22,MRPS7,EEF1B2,EEF2,EIF4EBP2,MRTO4,IMP3,RPL3,RPL6,RPL7A…
GO: Biological Process	GO:0016032	viral process		1.097E-11	9.228E-8	2.428E-9	2.335E-8	133	759	MFGE8,GRK2,VPS18,SLC25A5,APOE,GADD45GIP1,EIF3B,EIF3F,VAMP8,HYAL2,AXL,BAD,FADD,BAX,BANF1,RPL10A,NFKBIA,AP1M1,NOTCH1,FURIN,CD81,PCBP1,CHMP1A,RCC1,RPL36,POLR2E,POLR2I,POLR2K,POLR2L,THOC6,CTBP1,KDM4A,PSMA7,PSMB5,PSMB6,PSMB8,PSMB10,PSMC3,DAXX,PTBP1,PARD6A,UCKL1,NECTIN1,RAN,ACOT8,CHMP6,NLRX1,E4F1,VPS37B,EFNB3,TRIM28,EPHA2,RPL3,RPL6,RPL7A,RPL8,RPL11,RPL15,RPL18,RPL27,RPL27A,RPL28,RPL31,RPL35A,RPL37,RPL3…
GO: Biological Process	GO:0045333	cellular respiration		2.824E-6	2.376E-2	2.449E-4	2.355E-3	38	178	MDH2,ADSL,UQCC3,FLCN,BAX,NDUFA1,NDUFA2,NDUFA3,NDUFA6,NDUFA8,NDUFB2,NDUFB6,NDUFB7,NDUFB8,NDUFB10,NDUFV1,NDUFS6,NDUFS8,NDUFV3,TBRG4,UQCR10,NDUFB11,COX5B,NDUFS7,SCO2,SDHB,SDHC,MYBBP1A,OGDHL,UQCRQ,BLOC1S1,NDUFA12,SURF1,UQCR11,GPD1,PARK7,UQCRC1,NDUFA11
GO: Biological Process	GO:0048585	negative regulation of response to stimulus		3.810E-5	3.205E-1	2.451E-3	2.357E-2	194	1518	KCTD13,MEN1,FZD1,ADORA2A,ADRA2A,GRK2,AP2A1,AP2A2,AES,MIF,AKT1,C1QTNF1,MMP14,MNT,SLC25A5,ANXA2,BMF,LEMD2,CASTOR2,APOE,MT3,DLK2,FLCN,CCAR2,ATF4,HYAL2,BCL9L,PELI3,FADD,BAX,NBL1,FGFRL1,CCND1,BCR,SYNGAP1,IER3,NFKBIA,NFKBIB,NFKBIL1,NOS1,NOS3,NOTCH1,NOTCH4,CCN3,PGLYRP1,CALR,NT5E,CAMK2B,WFDC1,OGG1,PEBP1,HGS,PALM,CDC34,CDKN2D,PHB,SLC9A3R2,CACTIN,AP2S1,SLC9A3R1,NLE1,BAMBI,EPN1,NENF,CHAC1,MAPK8IP1,DDIT4,UBQ…
GO: Biological Process	GO:0035966	response to topologically incorrect protein		3.817E-5	3.211E-1	2.451E-3	2.357E-2	36	184	ACADVL,AMFR,ATF4,BAX,CCND1,CALR,SERPINH1,SRPRB,CHAC1,ATF6B,KLHDC3,DCTN1,CTDSP2,PDIA6,STUB1,CXXC1,TMEM129,RACK1,HYOU1,RNF126,SYVN1,MYDGF,TMBIM6,TLN1,SEC61G,PPP1R15A,SDF2L1,DNAJB2,HSPA1A,HSPA5,HSPB1,HSPE1,WFS1,ZBTB17,MANF,LMNA
GO: Biological Process	GO:0006402	mRNA catabolic process		5.538E-14	4.658E-10	2.452E-11	2.357E-10	60	218	KHSRP,LSM2,RPL10A,LSM4,EXOSC4,RPL36,GTPBP1,GTPBP2,DHX34,EIF4A3,PTBP1,DXO,UPF1,RNH1,MRTO4,RPL3,RPL6,RPL7A,RPL8,RPL11,RPL15,RPL18,RPL27,RPL27A,RPL28,RPL31,RPL35A,RPL37,RPL37A,RPL39,RPL41,RPLP0,RPLP1,RPLP2,RPS2,RPS3,RPS4X,RPS5,RPS8,RPS9,RPS10,RPS12,RPS15,RPS15A,RPS16,RPS20,RPS21,RPS23,RPS26,RPS27A,RPS28,RPS29,FAU,MEX3D,LSM7,AGO2,EDC4,EXOSC5,BTG2,RPSA
GO: Biological Process	GO:0006886	intracellular protein transport		1.140E-11	9.588E-8	2.458E-9	2.364E-8	177	1105	TOMM5,BAP1,FZD1,ADPRH,AP2A1,AP2A2,AKT1,KIF17,VPS18,ANXA2,RANBP3,RHOB,MT3,RANGRF,SSNA1,HYAL2,AUP1,RPL10A,CDK5R1,BSG,NFKBIA,NFKBIB,NFKBIL1,AP1M1,CCN3,CACNB1,CALR,OAZ1,AIP,OGG1,GRASP,HGS,PALM,AP4M1,CDKN1A,PEX10,SRPRB,TAOK2,AP1S1,AP2S1,SLC9A3R1,PIK3R2,SNX8,PEX16,BAMBI,SNX15,HOMER3,TOMM7,RPL36,TNPO2,TBC1D13,TBC1D10B,SEC24C,CSK,IPO13,PRKCD,TMED9,CTNNB1,MAPK7,GGA1,SNX17,KEAP1,PTPN14,PEX5,TESC,RAN,RANGAP…
GO: Cellular Component	GO:0005912	adherens junction		2.709E-12	2.782E-9	2.530E-10	1.900E-9	96	484	FZD1,MMP14,GIT1,ARF6,SPTBN4,RHOB,RHOG,MYH9,RPL10A,BSG,NME2,NOTCH1,CALR,CCND3,OXTR,CD81,CD151,SLC9A3R2,PIK3R2,ZFYVE21,PLEC,CNN2,CSPG4,CSRP2,CTNNB1,MAP2K2,CYBA,TES,KEAP1,MRC2,NECTIN1,ARPC1B,EPHA2,TNK2,RPL3,RPL6,RPL7A,RPL8,RPL18,RPL27,RPL31,RPL37A,RPLP0,RPLP1,RPLP2,RPS2,RPS3,RPS4X,RPS5,RPS8,RPS9,RPS10,RPS15,RPS16,RPS29,FES,SDC4,FLII,ITGA11,HYOU1,ASAP3,LIMS2,SLC9A1,FZD2,PDLIM2,TRIOBP,TNS2,SRCIN1,GSN,…
GO: Cellular Component	GO:0098796	membrane protein complex		1.576E-3	1.000E0	2.530E-2	1.900E-1	130	1059	ABCA2,TOMM5,FZD8,AP2A1,AP2A2,DOC2B,AMFR,VPS18,CNIH2,LAMTOR4,UQCC3,ATP1A3,VAMP8,ATP5F1D,ATP5F1E,ATP5MC2,ATP5MC3,ATP5ME,ATP6V1B2,MYH9,ATP5PO,AUP1,FADD,BAX,NDUFA1,NDUFA2,NDUFA3,NDUFA6,NDUFA8,HCN2,NDUFB2,NDUFB6,NDUFB7,NDUFB8,NDUFB10,NDUFV1,NDUFS6,NDUFS8,NDUFV3,AP1M1,CACNA1H,NOS1,CACNB1,CALR,AP5B1,AP4M1,CHMP1A,ATP6V1F,UQCR10,SRPRB,AP1S1,AP2S1,CLIC1,PIK3CD,PIK3R2,SNX8,FXYD1,CNTFR,NDUFB11,TOMM7,ATP6V1G1…
GO: Molecular Function	GO:0019843	rRNA binding		7.757E-7	1.776E-3	2.537E-4	2.109E-3	21	67	NOL12,CAVIN1,MRPS7,EEF2,MRTO4,IMP3,RPL3,RPL6,RPL8,RPL11,RPL37,RPL37A,RPLP0,RPLP1,RPLP2,RPS3,RPS4X,RPS5,RPS9,EMG1,TST
GO: Biological Process	GO:0007420	brain development		6.331E-4	1.000E0	2.554E-2	2.455E-1	101	755	MDK,MEN1,FZD1,ULK1,APLP1,MBD3,MT3,IRS2,MDGA1,AXL,BAD,BAX,BCR,CDK5R1,LDB1,PYGO2,BYSL,NNAT,NOTCH1,NRGN,HAP1,NT5E,CBS,OXTR,PAFAH1B3,NUMBL,ADGRG1,CKB,CNP,DDIT4,POU3F1,POU3F4,CRH,PITPNM1,SLC32A1,NCOR2,CSK,CTNNB1,DBI,PHGDH,SEMA4C,PEX5,MAFB,RAC3,RAN,ROGDI,SAMD4B,COX17,SEZ6L2,MAP1S,OLIG2,SEZ6,SOCS7,RAPGEF3,SCN5A,FGFR1,FOXG1,FOXJ1,ATF5,PHLDA1,FPGS,ARX,CCDC85C,BCAN,SIX3,ZNF335,SLIT1,SMO,UQCRQ,FAIM2,GART,SR…
GO: Biological Process	GO:0002474	antigen processing and presentation of peptide antigen via MHC class I		6.345E-4	1.000E0	2.554E-2	2.455E-1	20	94	CALR,SEC24C,CYBA,PSMA7,PSMB5,PSMB6,PSMB8,PSMB10,PSMC3,PSMD3,PSMD4,TAPBPL,SEC13,TAP1,TAP2,TAPBP,HLA-A,HLA-E,ITGB5,BAG6
GO: Biological Process	GO:1902600	proton transmembrane transport		6.550E-4	1.000E0	2.602E-2	2.502E-1	22	108	ATP1A3,ATP5F1D,ATP5F1E,ATP5MC2,ATP5MC3,ATP5ME,ATP6V1B2,ATP5PO,ATP6V1F,UQCR10,COX5B,ATP6V1G1,SLC36A1,TCIRG1,ATP5MG,SLC9A1,SLC9A5,UQCRQ,SLC46A1,SURF1,UQCR11,UQCRC1
GO: Biological Process	GO:0045936	negative regulation of phosphate metabolic process		6.558E-4	1.000E0	2.602E-2	2.502E-1	83	599	LMTK3,ELFN2,MEN1,ADORA2A,ADRA2A,MLLT1,AKT1,LEMD2,APLP1,APOE,FLCN,IRS2,HYAL2,BAX,IER3,NOS1,CTDSP1,CCNB1,PEBP1,PALM,CDKN1A,CDKN2D,PHB,CACTIN,SLC9A3R1,MAPK8IP1,DDIT4,PTPA,PPP5C,CSK,PRKCD,MAPK7,PARD6A,PPP1R37,TESC,MVP,DUSP4,DUSP8,DVL1,CTDSP2,FBXO31,KIRREL1,SPRY2,WDR81,SOCS7,FBLN1,RACK1,PPP1R1B,FEM1A,CIB1,SHB,SIRT6,HEXIM1,RGS14,PCIF1,INPP5J,SSTR4,STAT3,ZGPAT,GADD45G,GNAI2,SRCIN1,PTPN5,GSTP1,SH3BP5L,HR…
GO: Biological Process	GO:0010563	negative regulation of phosphorus metabolic process		6.558E-4	1.000E0	2.602E-2	2.502E-1	83	599	LMTK3,ELFN2,MEN1,ADORA2A,ADRA2A,MLLT1,AKT1,LEMD2,APLP1,APOE,FLCN,IRS2,HYAL2,BAX,IER3,NOS1,CTDSP1,CCNB1,PEBP1,PALM,CDKN1A,CDKN2D,PHB,CACTIN,SLC9A3R1,MAPK8IP1,DDIT4,PTPA,PPP5C,CSK,PRKCD,MAPK7,PARD6A,PPP1R37,TESC,MVP,DUSP4,DUSP8,DVL1,CTDSP2,FBXO31,KIRREL1,SPRY2,WDR81,SOCS7,FBLN1,RACK1,PPP1R1B,FEM1A,CIB1,SHB,SIRT6,HEXIM1,RGS14,PCIF1,INPP5J,SSTR4,STAT3,ZGPAT,GADD45G,GNAI2,SRCIN1,PTPN5,GSTP1,SH3BP5L,HR…
GO: Biological Process	GO:0042254	ribosome biogenesis		6.202E-14	5.217E-10	2.609E-11	2.508E-10	77	322	WDR18,DHX37,NOB1,RPL10A,BYSL,SNU13,RRP9,ABT1,NLE1,NOC4L,TSR3,EXOSC4,MRM2,RPL36,DDX49,CSNK1D,FBLL1,EIF4A3,RAN,IPO4,MRPS7,MRTO4,IMP3,RPL3,RPL6,RPL7A,RPL8,RBFA,RPL11,RPL15,RPL18,MTG1,RPL27,RPL27A,RPL28,RPL31,RPL35A,RPL37,RPL37A,RPL39,RPL41,RPLP0,RPLP1,RPLP2,FBL,RPS2,RPS3,RPS4X,RPS5,RPS8,RPS9,RPS10,RPS12,RPS15,RPS15A,RPS16,RPS20,RPS21,RPS23,RPS26,RPS27A,RPS28,RPS29,NPM3,FAU,EMG1,NHP2,TBL3,NSUN5,PDCD1…
GO: Biological Process	GO:0072522	purine-containing compound biosynthetic process		4.127E-5	3.472E-1	2.630E-3	2.529E-2	48	273	ACACB,ADCY3,ADCY5,ADCYAP1R1,ADORA2A,ADRA2A,ADSL,AK1,ALDOA,AMPD2,ADCY4,APLP1,APOE,UQCC3,FLCN,ATP5F1D,ATP5F1E,ATP5MC2,ATP5MC3,ATP5ME,ATP5PO,NME2,NOS1,NOS3,NT5E,PALM,PFAS,CRH,PANK4,NME6,RAMP2,TCIRG1,ATP5MG,COASY,GART,STAT3,RUNDC3A,SURF1,GNAI2,GNG7,TIMP2,GUK1,HRH3,HTR1B,WFS1,IMPDH1,IMPDH2,ADSSL1
GO: Biological Process	GO:0042776	mitochondrial ATP synthesis coupled proton transport		6.700E-4	1.000E0	2.646E-2	2.544E-1	7	17	ATP5F1D,ATP5F1E,ATP5MC2,ATP5MC3,ATP5ME,ATP5PO,ATP5MG
GO: Biological Process	GO:0009719	response to endogenous stimulus		6.767E-4	1.000E0	2.660E-2	2.557E-1	209	1740	ABCA2,ACADS,ACVR2B,MDK,ADCY3,ADCY5,ADCYAP1R1,MEN1,FZD1,ADORA2A,MFGE8,ADRA2A,AKT1,FOXO4,ALAD,MMP14,MMP15,LTBP4,ADCY4,ANXA2,HCN3,KLF15,APLP1,MBD3,MT3,LAMTOR4,FLCN,IRS2,ATP1A3,NPAS4,HYAL2,BCL9L,ATP6V1B2,BAD,BAX,NBL1,FGFRL1,CCND1,HCN2,BSG,NFKBIA,EIF2B4,EIF2B2,CACNA1H,NOS1,NOS3,NOTCH1,NOTCH2,CAD,CALR,NTS,WFDC1,OGG1,CBS,CCND3,OXTR,FURIN,FIBP,CD81,CDKN1A,PDE1B,ATP6V1F,PHB,PIK3R2,DDX54,BAMBI,TXN2,PLOD1,C…
GO: Cellular Component	GO:0030427	site of polarized growth		1.686E-3	1.000E0	2.663E-2	2.001E-1	31	187	GPRIN1,PREX1,AMFR,CDK5R1,HAP1,CBARP,MAPK8IP1,DBN1,PTPRF,PARD6A,NECTIN1,RAC3,DVL1,EXOC8,MYH14,TNK2,KATNB1,PI4K2A,RAPGEF3,FKBP4,CIB1,SMO,FSCN1,INPP5J,KPTN,ORAI1,TIMP2,IGHMBP2,LRRTM1,GDPD5,LIMK1
GO: Biological Process	GO:0045596	negative regulation of cell differentiation		4.306E-5	3.622E-1	2.723E-3	2.618E-2	100	694	HIST1H4I,MEN1,HIST1H4A,HIST1H4D,HIST1H4F,HIST1H4C,HIST1H4H,DISP3,FOXO4,ULK1,TMEM176B,APOE,FUOM,ARF6,ARHGDIA,MT3,CCND1,SYNGAP1,CDK5R1,LDB1,NFKBIA,C1QC,NME2,NOTCH1,NOTCH4,CCN3,PGLYRP1,CALR,CTDSP1,ADGRG1,NTN1,TNPO2,CXCL14,CARTPT,NCOR2,FOXP4,CSPG4,KDM4A,PRKCSH,CTNNB1,DAXX,PTBP1,CASZ1,SEMA4C,RNF10,MAFB,FAM57B,RAP1GAP,RARG,HDAC5,DTX1,OLIG2,SEZ6,TMEM176A,FBLN1,FGFR1,FKBP4,FOXG1,FOXJ1,SEMA3F,SEMA6B,CIB1,…
GO: Cellular Component	GO:0044432	endoplasmic reticulum part		1.301E-4	1.337E-1	2.728E-3	2.049E-2	150	1177	OSBPL7,DISP3,ALOX5AP,AMFR,COL20A1,MCFD2,CNIH2,RHOG,ORMDL2,ATP2A3,AUP1,CDS2,BAX,NFE2L1,MYRF,NOS1,NOTCH1,NOTCH2,NOTCH4,CALR,CAMK2B,SERPINH1,TMED4,FURIN,DPM3,SRPRB,LMF2,PEX16,TMCO1,PLOD1,COL1A2,MAPK8IP1,COL6A2,COL9A2,MPDU1,POR,ATF6B,PITPNM1,P4HTM,SEC24C,TMED9,PRKCSH,FITM2,CYBA,CLSTN3,MLEC,PIEZO1,TMEM214,DBI,RETSAT,DDOST,CANT1,PCYT2,EMC10,DMPK,DPAGT1,FAM57B,PDCD6,TAPBPL,EMC9,SEZ6L2,PDIA6,APH1A,IER3IP…
GO: Molecular Function	GO:0031072	heat shock protein binding		1.789E-4	4.095E-1	2.730E-2	2.269E-1	23	106	ULK1,ARHGDIA,BAX,NFKBIA,NOS3,PPP5C,DAXX,DMPK,ENO1,STUB1,RPS3,FKBP4,FKBP5,ATF5,UNC45A,USP19,LMAN2,CDC37,DNAJB2,HSPA1A,HSPA1B,BAG6,LIMK1
GO: Cellular Component	GO:0043209	myelin sheath		1.042E-6	1.070E-3	2.744E-5	2.061E-4	42	202	MDH2,MIF,SLC25A5,ANXA2,ARF6,ATP1A3,ATP6V1B2,ATP5PO,NME2,CLDN11,PEBP1,PHB,CKB,SLC25A3,CNP,PHGDH,MYH14,ENO1,ENO2,RPS27A,TUBA1B,TUBB4B,GNB5,FSCN1,SOD1,GFAP,STX4,EHD1,GSN,TKT,SCRIB,HRH3,IGSF8,TUFM,UBC,UCHL1,UQCRC1,HSPA5,YWHAG,ITPR3,GJC2,LLGL1
GO: Biological Process	GO:0044033	multi-organism metabolic process		2.652E-16	2.231E-12	2.788E-13	2.681E-12	62	207	EIF3B,EIF3F,RPL10A,NOTCH1,FURIN,PCBP1,RPL36,POLR2E,POLR2I,POLR2K,POLR2L,MAP2K2,PTBP1,TRIM28,RPL3,RPL6,RPL7A,RPL8,RPL11,RPL15,RPL18,RPL27,RPL27A,RPL28,RPL31,RPL35A,RPL37,RPL37A,RPL39,RPL41,RPLP0,RPLP1,RPLP2,RPS2,RPS3,RPS4X,RPS5,RPS8,RPS9,RPS10,RPS12,RPS15,RPS15A,RPS16,RPS20,RPS21,RPS23,RPS26,RPS27A,RPS28,RPS29,FAU,IFITM3,EIF3L,MON1B,TRIM32,SMARCB1,USF2,JUN,TRIM8,NELFE,RPSA
GO: Biological Process	GO:0009894	regulation of catabolic process		3.301E-6	2.777E-2	2.834E-4	2.725E-3	115	777	ACACB,ADRA2A,MIF,OSBPL7,AKT1,ULK1,ANXA2,APOE,MT3,FLCN,CCAR2,IRS2,ATP6V1B2,BAD,BAX,CDK5R1,IER3,SQSTM1,CAPNS1,OAZ1,CCNB1,FURIN,HGS,CD81,DEDD,PHB,PIK3R2,ANAPC2,DDIT4,RNF166,UBQLN2,PLEKHF1,ATP6V1G1,GTPBP1,SOGA1,CSNK1D,CST3,PRKCD,KDM4A,MAPK7,DHX34,GGA1,PSAP,PSMA7,PSMB5,PSMB6,PSMB8,PSMB10,PSMC3,DAPK3,PSMD3,PSMD4,DBI,KEAP1,RGP1,DFFA,EGLN2,RARRES2,DVL1,UPF1,EXOC8,RNF41,BSCL2,ENDOG,RPL28,STUB1,APC2,RPS27A…
Disease	C0024421	Macroglossia	DisGeNET Curated	5.000E-5	4.573E-1	2.858E-2	2.772E-1	17	68	AKT1,ATP6V1B2,AIP,PSMB8,DVL1,RFC2,ELN,FOXG1,SDHB,SDHC,FUCA1,GAA,THRA,HRAS,CLIP2,IDUA,LIMK1
GO: Biological Process	GO:0030182	neuron differentiation		3.371E-6	2.836E-2	2.865E-4	2.754E-3	187	1398	GPRIN1,SLC12A5,FZD1,FZD8,ADORA2A,UNC5A,ADRA2C,MIF,DISP3,IGSF9,AKT1,NLGN2,ULK1,PREX1,LRFN1,FOXO6,GIT1,ENC1,DBNL,APOE,FUOM,CPNE5,BLOC1S2,ARF6,SPTBN4,ARHGDIA,MT3,MDGA1,ADGRB1,NBL1,SYNGAP1,CDK5R1,LDB1,EIF2B2,BYSL,NNAT,NME2,NOTCH1,DDR1,HAP1,CALR,CAMK2B,CTDSP1,PALM,NUMBL,CHAT,ABT1,SLC9A3R1,ANAPC2,NTN1,PLXNA1,CNP,PLXNB1,DDIT4,DLL4,MINK1,POU3F4,NSMF,CSPG4,DYNLL2,KDM4A,PRKCSH,CTNNB1,MAP2K2,KIF26A,LRFN3,DA…
GO: Biological Process	GO:0042326	negative regulation of phosphorylation		7.332E-4	1.000E0	2.869E-2	2.758E-1	68	473	MEN1,ADORA2A,MLLT1,AKT1,LEMD2,APOE,FLCN,IRS2,HYAL2,BAX,IER3,NOS1,CTDSP1,CCNB1,PEBP1,CDKN1A,CDKN2D,PHB,CACTIN,SLC9A3R1,MAPK8IP1,DDIT4,PPP5C,CSK,PRKCD,MAPK7,PARD6A,TESC,MVP,DUSP4,DUSP8,DVL1,CTDSP2,FBXO31,KIRREL1,SPRY2,SOCS7,FBLN1,RACK1,PPP1R1B,FEM1A,CIB1,SHB,SIRT6,HEXIM1,RGS14,INPP5J,STAT3,ZGPAT,GADD45G,SRCIN1,PTPN5,GSTP1,SH3BP5L,PARK7,PPP1R15A,PIK3IP1,UCHL1,FLRT1,HSPB1,YWHAG,INHA,LRRTM1,JUN,LRRC4B…
GO: Biological Process	GO:1904886	beta-catenin destruction complex disassembly		7.387E-4	1.000E0	2.877E-2	2.766E-1	8	22	FZD1,CTNNB1,FRAT1,DVL1,DVL2,FZD2,FZD5,LRP5
GO: Biological Process	GO:0030968	endoplasmic reticulum unfolded protein response		4.650E-5	3.911E-1	2.919E-3	2.806E-2	28	130	ACADVL,AMFR,ATF4,BAX,CCND1,CALR,SRPRB,ATF6B,KLHDC3,DCTN1,CTDSP2,PDIA6,STUB1,CXXC1,RACK1,HYOU1,SYVN1,MYDGF,TMBIM6,TLN1,SEC61G,PPP1R15A,SDF2L1,HSPA1A,HSPA5,WFS1,ZBTB17,LMNA
GO: Biological Process	GO:0009205	purine ribonucleoside triphosphate metabolic process		2.158E-9	1.815E-5	2.928E-7	2.815E-6	58	263	MIF,AK1,ALDOA,AMPD2,GADD45GIP1,UQCC3,FLCN,ATP5F1D,ATP5F1E,ATP5MC2,ATP5MC3,ATP5ME,ATP6V1B2,ATP5PO,BAD,NDUFA1,NDUFA2,NDUFA3,NDUFA6,NDUFA8,NDUFB2,NDUFB6,NDUFB7,NDUFB8,NDUFB10,NDUFV1,NDUFS6,NDUFS8,NDUFV3,IER3,NME2,PFKL,UQCR10,NDUFB11,DDIT4,COX5B,NDUFS7,NME6,ENO1,ENO2,TCIRG1,SDHC,SIRT6,ATP5MG,OGDHL,UQCRQ,GALK1,STAT3,NDUFA12,SURF1,UQCR11,GPD1,GUK1,PARK7,UQCRC1,HSPA1A,HSPA1B,NDUFA11
GO: Cellular Component	GO:0005739	mitochondrion		1.143E-15	1.174E-12	2.935E-13	2.205E-12	269	1769	CLPP,ACAA1,ACACB,ACADS,ACADVL,MARS,MDH2,COMTD1,TOMM5,ADSL,AKT1,ALDH2,SLC25A29,ALDOA,MPST,SLC25A5,BMF,BLOC1S2,GADD45GIP1,AKR7A2,ARL2,MT3,MRPL15,UQCC3,NUDT1,ASL,CCAR2,VAMP8,ATP5F1D,ATP5F1E,ATP5MC2,ATP5MC3,ATP5ME,ATP5PO,HRK,CDS2,BAD,BAX,BCAT2,BCKDHA,NDUFA1,NDUFA2,NDUFA3,NDUFA6,NDUFA8,NDUFB2,NDUFB6,NDUFB7,NDUFB8,NDUFB10,NDUFV1,NDUFS6,NDUFS8,NDUFV3,RPL10A,BSG,NME2,NOS1,NOS3,NRGN,HAP1,NTHL1,OGG1,KYAT1,…
GO: Cellular Component	GO:0005777	peroxisome		1.962E-3	1.000E0	2.945E-2	2.213E-1	25	142	ACAA1,PEX11A,PEX10,GRHPR,PEX16,CRYM,MAP2K2,PEX5,MUL1,ACOT8,ISOC1,FIS1,ECH1,MIEF2,ACOT1,PEX26,SOD1,TYSND1,DHRS4,ACSBG1,MLYCD,TKT,HMGCL,VIM,IMPDH2
GO: Cellular Component	GO:0042579	microbody		1.962E-3	1.000E0	2.945E-2	2.213E-1	25	142	ACAA1,PEX11A,PEX10,GRHPR,PEX16,CRYM,MAP2K2,PEX5,MUL1,ACOT8,ISOC1,FIS1,ECH1,MIEF2,ACOT1,PEX26,SOD1,TYSND1,DHRS4,ACSBG1,MLYCD,TKT,HMGCL,VIM,IMPDH2
GO: Cellular Component	GO:0031227	intrinsic component of endoplasmic reticulum membrane		1.962E-3	1.000E0	2.945E-2	2.213E-1	25	142	AMFR,AUP1,CALR,DPM3,ATF6B,FITM2,EMC10,DPAGT1,EMC9,BSCL2,RTN2,SYVN1,SREBF2,DGAT2,TAP1,TAP2,TAPBP,TEX261,PGAP3,HLA-A,HLA-E,FKBP8,HSPA5,WFS1,PIGS
GO: Cellular Component	GO:0000139	Golgi membrane		1.979E-3	1.000E0	2.945E-2	2.213E-1	92	716	RHBDD2,LMTK3,MFNG,MGAT1,AP2A1,MCFD2,CNIH2,DBNL,NDST2,CHST1,ARF3,GLIPR2,HYAL2,BSG,AP1M1,NOS3,NOTCH1,NOTCH2,NOTCH4,CABP7,NRGN,FURIN,ENTPD6,AP4M1,AP1S1,TMCO1,TRAPPC6A,PITPNM1,SEC24C,CSNK1D,GALNT9,TMED9,CLSTN3,QPCTL,RGP1,TMEM130,CANT1,CHPF,FAM57B,RAP1GAP,TAPBPL,SCAMP3,NOSIP,ARFRP1,APH1A,EMP2,NAGPA,VPS52,CDIPT,TRAPPC4,CHST12,SEC13,PTGES2,ZDHHC7,ST3GAL2,PPP6R1,SLC2A1,ARFGAP2,SCAP,NSG2,NSG1,TMBIM4,TRAPP…
GO: Biological Process	GO:0019439	aromatic compound catabolic process		1.027E-12	8.641E-9	2.980E-10	2.865E-9	97	474	MGAT1,MIF,KHSRP,NUDT1,LSM2,BAX,RPL10A,BLVRB,IER3,NT5E,NTHL1,OGG1,KYAT1,PDE1B,LSM4,DCTPP1,EXOSC4,CNP,DDIT4,RPL36,COMT,GTPBP1,PPP1R8,GTPBP2,MAPK7,DHX34,EIF4A3,PTBP1,DFFA,CANT1,QDPR,DNASE2,DXO,UPF1,RNH1,MRTO4,ENDOG,RPL3,RPL6,RPL7A,RPL8,RPL11,RPL15,RPL18,NUDT18,RPL27,RPL27A,RPL28,RPL31,RPL35A,RPL37,RPL37A,RPL39,RPL41,RPLP0,RPLP1,RPLP2,RPS2,RPS3,RPS4X,RPS5,RPS8,RPS9,RPS10,RPS12,RPS15,RPS15A,RPS16,RPS2…
GO: Biological Process	GO:0034622	cellular protein-containing complex assembly		7.708E-4	1.000E0	2.988E-2	2.873E-1	127	991	MCM2,HIST1H4I,HIST1H2BE,HIST1H2BC,HIST1H4A,HIST1H4D,HIST1H4F,HIST1H4C,HIST1H4H,PREX1,PSMG4,VPS18,DBNL,BLOC1S2,ARF6,SPTBN4,ARL2,UQCC3,EIF3B,EIF3F,LSM2,EIF3I,VAMP8,SRSF9,MYH9,NDUFA1,NDUFA2,NDUFA3,NDUFA6,NDUFA8,NDUFB2,NDUFB6,NDUFB7,NDUFB8,NDUFB10,NDUFV1,NDUFS6,NDUFS8,NDUFV3,H1FX,CALR,ABT1,UQCR10,AP2S1,PIK3R2,LSM4,NDUFB11,TNPO2,NDUFAF3,AAR2,CSNK1D,CALY,PRKCD,CYBA,NDUFS7,PET100,PSMC3,PSMD4,DAXX,DBN1,P…
GO: Biological Process	GO:0051248	negative regulation of protein metabolic process		4.834E-5	4.066E-1	3.000E-3	2.884E-2	156	1183	LMTK3,ELFN2,MEN1,ADORA2A,MIF,MLLT1,AKT1,ANXA2,ENC1,LEMD2,KLF15,APOE,MT3,FLCN,CCAR2,ATF4,HYAL2,PELI3,BAX,EIF2B4,C4B,NOS1,HAP1,CALR,WFDC1,CTDSP1,SERPINH1,CCNB1,PEBP1,FURIN,DEDD,CDKN1A,CDKN2D,PHB,CACTIN,SLC9A3R1,ANAPC2,NLE1,CHAC1,MAPK8IP1,DDIT4,POR,NCOR2,PTPA,PPP5C,CSK,CST3,CSTB,PRKCD,CTBP1,KDM4A,CTNNB1,MAPK7,MAP2K2,EIF4A3,PSMA7,INTS1,PSMB5,PSMB6,PSMB8,PSMB10,PSMC3,DAPK3,PSMD3,PSMD4,RGP1,PARD6A,PPP1…
GO: Biological Process	GO:0071353	cellular response to interleukin-4		4.850E-5	4.080E-1	3.000E-3	2.884E-2	11	29	MCM2,ALAD,KEAP1,RPL3,RPLP0,RPS2,TUBA1B,FASN,HSPA5,IMPDH2,JAK3
GO: Biological Process	GO:1904837	beta-catenin-TCF complex assembly		7.782E-4	1.000E0	3.003E-2	2.887E-1	12	44	HIST1H4I,TRRAP,MEN1,HIST1H4A,HIST1H4D,HIST1H4F,HIST1H4C,HIST1H4H,BCL9L,PYGO2,CTNNB1,TLE3
GO: Biological Process	GO:1902473	regulation of protein localization to synapse		7.914E-4	1.000E0	3.040E-2	2.923E-1	5	9	NLGN2,CNIH2,CLSTN3,DVL1,WNT7A
GO: Biological Process	GO:0022603	regulation of anatomical structure morphogenesis		3.632E-6	3.055E-2	3.055E-4	2.937E-3	156	1128	MCRIP1,FZD1,AP2A1,AP2A2,FOXO4,ULK1,ALDOA,PREX1,APOE,CPNE5,RHOB,ARHGDIA,MT3,GLIPR2,FLCN,BCL9L,MYH9,ADGRB1,BAX,BCR,SYNGAP1,CDK5R1,NFATC2,EIF2B2,WRAP73,NOS3,FMNL1,NOTCH1,NOTCH4,HAP1,CALR,CAMK2B,PALM,NUMBL,TAOK2,AP2S1,SLC9A3R1,ANAPC2,BAMBI,NTN1,PLXNA1,PLXNB1,ARHGEF19,DLL4,POR,ADGRA2,TBC1D13,TBC1D10B,CELSR1,SYNE3,NSMF,CSNK1D,CSNK1G2,CST3,CTNNB1,MAPK7,MAP2K2,FITM2,PSMA7,PSMB5,PSMB6,PSMB8,PSMB10,PSMC3,D…
GO: Biological Process	GO:0031329	regulation of cellular catabolic process		3.730E-6	3.138E-2	3.107E-4	2.987E-3	101	663	ACACB,ADRA2A,MIF,OSBPL7,AKT1,ULK1,ANXA2,APOE,MT3,FLCN,CCAR2,IRS2,ATP6V1B2,BAD,BAX,CDK5R1,IER3,SQSTM1,CAPNS1,CCNB1,FURIN,CD81,PIK3R2,ANAPC2,DDIT4,RNF166,UBQLN2,PLEKHF1,ATP6V1G1,GTPBP1,SOGA1,CSNK1D,CST3,PRKCD,KDM4A,MAPK7,DHX34,PSAP,PSMA7,PSMB5,PSMB6,PSMB8,PSMB10,PSMC3,DAPK3,PSMD3,PSMD4,DBI,KEAP1,RGP1,DFFA,DVL1,UPF1,EXOC8,RNF41,ENDOG,RPL28,STUB1,RPS27A,FZR1,RACK1,RAPGEF3,HAX1,SGTA,ANAPC11,SIRT6,SNRN…
GO: Biological Process	GO:0010608	posttranscriptional regulation of gene expression		8.219E-4	1.000E0	3.121E-2	3.001E-1	68	475	MIF4GD,AKT1,ENC1,APLP1,KHSRP,ATF4,EIF3B,EIF3F,EIF3I,EIF2B4,EIF2B2,HAP1,CALR,EXOSC4,ZNF385A,NCOR2,GTPBP2,PRKCD,MAP2K2,EIF4A3,PSMA7,PSMB5,PSMB6,PSMB8,PSMB10,PSMC3,DAPK3,PSMD3,PSMD4,PTBP1,DXO,RAN,UPF1,EEF2,EIF4EBP2,IMP3,MTG1,RPS3,RPS4X,RPS5,RPS9,RPS27A,RXRA,RACK1,EIF3L,POLDIP3,MEX3D,LSM14B,PCID2,AGO2,STAT3,EIF3K,GCN1,MKNK2,CDC37,BRF1,CARHSP1,PPP1R15A,UBC,HSPA1A,HSPB1,EIF4H,WTIP,PAIP2B,EXOSC5,BTG2,DD…
GO: Biological Process	GO:0080135	regulation of cellular response to stress		8.224E-4	1.000E0	3.121E-2	3.001E-1	100	752	MEN1,FZD8,MIF,MAP3K10,AKT1,ULK1,DBNL,MT3,CCAR2,ATF4,ATP6V1B2,BAX,CDK5R1,IER3,SQSTM1,CAMK2B,CAPNS1,MAP3K6,OGG1,CBS,CDKN2D,TAOK2,MAPK8IP1,UBQLN2,MINK1,ATP6V1G1,ZNF385A,TRAF4,PPP4C,PRKCD,MAPK7,MAP2K2,PSAP,DAXX,SEMA4C,TMEM161A,PTPRF,MUL1,HSPB8,RAD9A,YPEL3,DVL2,EXOC8,TRIM28,RNF41,ENDOG,RPA2,RPL28,RPS3,RACK1,HAX1,FKBP4,FLT4,HYOU1,SGTA,SIRT6,PIAS4,TRIM32,SYVN1,SOD1,SREBF1,SREBF2,USP19,MAPK8IP3,GADD45G,E…
GO: Biological Process	GO:0010975	regulation of neuron projection development		8.237E-4	1.000E0	3.121E-2	3.001E-1	70	492	MIF,AKT1,NLGN2,ULK1,PREX1,FOXO6,ENC1,APOE,CPNE5,ARF6,ARHGDIA,MT3,SYNGAP1,CDK5R1,EIF2B2,NME2,HAP1,CAMK2B,PALM,NUMBL,ANAPC2,NTN1,PLXNA1,PLXNB1,NSMF,CSPG4,PRKCSH,MAP2K2,DBN1,PTBP1,SEMA4C,PTPRF,MUL1,DVL1,RET,FBXO31,SEZ6,KATNB1,TPBGL,FES,FGFR1,BAIAP2,FKBP4,SEMA3F,SEMA6B,CIB1,SLIT1,INPP5J,SARM1,SRF,GFAP,STK11,OBSL1,GRN,SRCIN1,NCS1,PTPN5,HLA-A,PLXNB2,VIM,WNT7A,ID1,SHANK3,SEMA3G,RGMA,ITM2C,LIMK1,LRP1,RND…
GO: Biological Process	GO:0006119	oxidative phosphorylation		3.090E-7	2.600E-3	3.132E-5	3.011E-4	29	108	GADD45GIP1,UQCC3,ATP5F1D,NDUFA1,NDUFA2,NDUFA3,NDUFA6,NDUFA8,NDUFB2,NDUFB6,NDUFB7,NDUFB8,NDUFB10,NDUFV1,NDUFS6,NDUFS8,NDUFV3,UQCR10,NDUFB11,COX5B,NDUFS7,SDHC,UQCRQ,NDUFA12,SURF1,UQCR11,PARK7,UQCRC1,NDUFA11
GO: Biological Process	GO:0031399	regulation of protein modification process		8.416E-4	1.000E0	3.175E-2	3.052E-1	219	1841	PPP1R14A,ACVR2B,LMTK3,ELFN2,ADCY3,ADCY5,MEN1,FZD1,FZD8,ADORA2A,ADRA2A,ADRA2C,MIF,MAP3K10,MLLT1,AKT1,C1QTNF1,ADCY4,ANXA2,LEMD2,DBNL,KLF15,APOE,SPTBN4,MT3,GLIPR2,FLCN,CCAR2,HYAL2,PELI3,BAX,CCND1,SYNGAP1,CDK5R1,PYGO2,SQSTM1,NOS1,DIRAS1,CTDSP1,MAP3K6,CBS,CCNB1,CCND3,PEBP1,HGS,CD81,CDKN1A,CDKN2D,PHB,TAOK2,CACTIN,SLC9A3R1,PIM1,ANAPC2,NENF,BRMS1,MAPK8IP1,DDIT4,MINK1,CRH,CARTPT,NCOR2,TRAF4,PTPA,NSMF,PPP5…
GO: Biological Process	GO:0044270	cellular nitrogen compound catabolic process		7.928E-14	6.669E-10	3.176E-11	3.053E-10	98	462	MGAT1,MIF,MPST,KHSRP,NUDT1,LSM2,BAX,RPL10A,BLVRB,IER3,NT5E,NTHL1,OGG1,KYAT1,PDE1B,LSM4,DCTPP1,EXOSC4,CNP,DDIT4,RPL36,POR,GTPBP1,PPP1R8,GTPBP2,MAPK7,DHX34,EIF4A3,PTBP1,DFFA,CANT1,DNASE2,DXO,UPF1,RNH1,MRTO4,ENDOG,RPL3,RPL6,RPL7A,RPL8,RPL11,RPL15,RPL18,NUDT18,RPL27,RPL27A,RPL28,RPL31,RPL35A,RPL37,RPL37A,RPL39,RPL41,RPLP0,RPLP1,RPLP2,RPS2,RPS3,RPS4X,RPS5,RPS8,RPS9,RPS10,RPS12,RPS15,RPS15A,RPS16,RPS20…
GO: Cellular Component	GO:0030426	growth cone		2.168E-3	1.000E0	3.181E-2	2.389E-1	30	182	GPRIN1,PREX1,AMFR,CDK5R1,HAP1,CBARP,MAPK8IP1,DBN1,PTPRF,PARD6A,NECTIN1,RAC3,DVL1,EXOC8,MYH14,TNK2,KATNB1,RAPGEF3,FKBP4,CIB1,SMO,FSCN1,INPP5J,KPTN,ORAI1,TIMP2,IGHMBP2,LRRTM1,GDPD5,LIMK1
GO: Biological Process	GO:0045664	regulation of neuron differentiation		5.180E-5	4.358E-1	3.181E-3	3.058E-2	95	655	ADRA2C,MIF,DISP3,AKT1,NLGN2,ULK1,PREX1,FOXO6,ENC1,APOE,FUOM,CPNE5,ARF6,ARHGDIA,MT3,NBL1,SYNGAP1,CDK5R1,EIF2B2,NME2,NOTCH1,HAP1,CALR,CAMK2B,CTDSP1,PALM,NUMBL,ANAPC2,NTN1,PLXNA1,PLXNB1,NSMF,CSPG4,KDM4A,PRKCSH,MAP2K2,DBN1,PTBP1,CASZ1,SEMA4C,PTPRF,MUL1,RAC3,RAP1GAP,DTX1,DVL1,RET,FBXO31,OLIG2,SEZ6,KATNB1,TPBGL,HMG20B,FES,FGFR1,BAIAP2,FKBP4,FOXG1,SEMA3F,SEMA6B,CIB1,SIX3,TRIM32,SLIT1,INPP5J,SARM1,SRF,GF…
GO: Biological Process	GO:0008593	regulation of Notch signaling pathway		5.233E-5	4.402E-1	3.182E-3	3.059E-2	19	73	MFNG,MMP14,DLK2,NFKBIA,NOTCH1,NOTCH4,CCN3,CHAC1,DLL4,DTX1,SLC35C2,EGFL7,HIF1AN,STAT3,JAG2,GDPD5,DLL1,LFNG,LLGL1
GO: Biological Process	GO:0043436	oxoacid metabolic process		5.258E-5	4.423E-1	3.182E-3	3.059E-2	148	1114	ACAA1,ACACB,ACADS,ACADVL,MARS,CYGB,ACY1,MDH2,LRRC47,MIF,AKT1,ALDOA,ALOX5AP,MPST,MCFD2,NDST2,CHST1,ASL,ATF4,IRS2,BCAT2,BCKDHA,NDUFS6,IER3,BSG,SLC5A6,EIF2B4,EIF2B2,NOS1,NOS3,CAD,OAZ1,CBR1,CBS,KYAT1,PCK2,PFAS,PFKL,CKB,GRHPR,PYCR2,PLOD1,DDIT4,COMT,POR,FADS6,PARS2,CRYM,ACOT11,NCAN,CSPG4,CTNNB1,PRODH,EIF4A3,PSMA7,PSMB5,PSMB6,PSMB8,PSMB10,PSMC3,PSMD3,PSMD4,SPOCK2,DBI,KEAP1,PHGDH,NQO1,PEX5,SARDH,CARS2,CH…
GO: Biological Process	GO:0007006	mitochondrial membrane organization		8.492E-4	1.000E0	3.189E-2	3.066E-1	21	103	SLC25A5,BMF,BLOC1S2,UQCC3,BAD,BAX,IER3,CNP,TOMM7,PLEKHF1,DYNLL2,PEX5,MUL1,ALKBH7,SIVA1,SLC9A1,TIMM50,STAT3,HSPA1A,YWHAG,RHOT2
GO: Biological Process	GO:1901361	organic cyclic compound catabolic process		1.158E-12	9.745E-9	3.248E-10	3.123E-9	102	510	MGAT1,MIF,APOE,KHSRP,MT3,NUDT1,LSM2,BAX,RPL10A,BLVRB,IER3,NT5E,NTHL1,OGG1,KYAT1,PDE1B,LSM4,DCTPP1,EXOSC4,CNP,DDIT4,RPL36,COMT,GTPBP1,PPP1R8,GTPBP2,MAPK7,DHX34,PRODH,EIF4A3,SNX17,PTBP1,DFFA,CANT1,QDPR,DNASE2,DXO,UPF1,RNH1,MRTO4,ENDOG,RPL3,RPL6,RPL7A,RPL8,RPL11,RPL15,RPL18,NUDT18,RPL27,RPL27A,RPL28,RPL31,RPL35A,RPL37,RPL37A,RPL39,RPL41,RPLP0,RPLP1,RPLP2,RPS2,RPS3,RPS4X,RPS5,RPS8,RPS9,RPS10,RPS12,RP…
GO: Biological Process	GO:0009967	positive regulation of signal transduction		8.726E-4	1.000E0	3.262E-2	3.137E-1	181	1488	ACVR2B,MEN1,FZD8,ADORA2A,MFNG,ADRA2A,ADRA2C,MIF,MAP3K10,AKT1,C1QTNF1,NLGN2,BMF,DBNL,RHOC,MT3,LAMTOR4,GLIPR2,FLCN,CCAR2,HYAL2,HRK,AXL,PELI3,BAD,FADD,BAX,NOS1,NOTCH1,NOTCH2,CCN3,DIRAS1,HAP1,CALR,CAMK2B,MAP3K6,TMED4,PEBP1,FURIN,CD81,ADGRG1,PHB,TAOK2,SLC9A3R1,NLE1,BAMBI,NENF,PLXNB1,MAPK8IP1,UBQLN2,DLL4,PLEKHF1,G0S2,MINK1,POR,ZNF385A,SH2B1,CARTPT,TRAF4,PPP5C,CSK,CSNK1D,CSPG4,DYNLL2,PRKCD,CTNNB1,MAP2K2…
GO: Biological Process	GO:0031344	regulation of cell projection organization		8.802E-4	1.000E0	3.276E-2	3.150E-1	89	657	MIF,AKT1,NLGN2,ULK1,PREX1,FOXO6,ENC1,APOE,CPNE5,ARF6,RHOG,ARHGDIA,MT3,SYNGAP1,CDK5R1,EIF2B2,WRAP73,NME2,HAP1,CAMK2B,PALM,NUMBL,ANAPC2,NTN1,PLXNA1,PLXNB1,TBC1D13,TBC1D10B,NSMF,CSPG4,PRKCD,PRKCSH,MAP2K2,DBN1,PTBP1,SEMA4C,PTPRF,MUL1,RAP1GAP,DVL1,RET,TBC1D10A,FBXO31,EPHA2,SEZ6,SPRY2,KATNB1,TPBGL,TBC1D16,FES,FGFR1,BAIAP2,FKBP4,SEMA3F,SEMA6B,CIB1,TCHP,FUZ,MIEN1,SLIT1,FSCN1,INPP5J,SARM1,SRF,GFAP,RCC2,ST…
GO: Biological Process	GO:0023057	negative regulation of signaling		5.492E-5	4.620E-1	3.300E-3	3.173E-2	170	1311	KCTD13,MEN1,FZD1,ADRA2A,ADRA2C,GRK2,AP2A1,AP2A2,AES,MIF,AKT1,MMP14,MNT,SLC25A5,CNIH2,BMF,LEMD2,CASTOR2,APOE,DLK2,FLCN,CCAR2,HYAL2,BCL9L,PELI3,FADD,BAX,NBL1,FGFRL1,CCND1,SYNGAP1,IER3,NFKBIA,NFKBIB,NFKBIL1,NOS1,NOS3,NOTCH1,NOTCH4,CCN3,CALR,CAMK2B,PEBP1,HGS,PALM,CDC34,CDKN2D,PFKL,PHB,SLC9A3R2,CACTIN,AP2S1,SLC9A3R1,NLE1,BAMBI,EPN1,CHAC1,MAPK8IP1,DDIT4,UBQLN2,DLL4,ZNF385A,KANK2,ADGRA2,CRH,CARTPT,PIM3,…
GO: Cellular Component	GO:0005688	U6 snRNP		2.293E-3	1.000E0	3.303E-2	2.481E-1	4	7	LSM2,LSM4,LSM7,DDX39B
GO: Cellular Component	GO:0000785	chromatin		2.316E-3	1.000E0	3.303E-2	2.481E-1	66	487	H2AFV,MCM2,HIST1H4I,TRRAP,MEN1,HIST1H2BE,HIST1H2BC,HIST1H4A,HIST1H4D,HIST1H4F,HIST1H4C,HIST1H4H,ALDOA,BAHCC1,ENC1,MBD3,CCAR2,LDB1,H1FX,LRWD1,RCC1,TFPT,EXOSC4,BRMS1,ZNF385A,NCOR2,NSMF,KLHDC3,KDM4A,CTNNB1,INO80B,DAXX,DFFA,RAN,RARG,HDAC5,UPF1,IPO4,RING1,TRIM28,RPA2,ACTR5,ETV3,RXRA,CITED2,ZNHIT1,SIRT6,BAHD1,SMARCB1,SMARCD3,H2AFJ,SRF,RUVBL2,STAT3,TNRC18,EHMT2,SIN3B,TCF3,MAU2,HIST1H2BB,PARK7,HMGN1,HMGA…
GO: Biological Process	GO:1901136	carbohydrate derivative catabolic process		8.933E-4	1.000E0	3.310E-2	3.183E-1	32	184	MGAT1,NUDT1,HYAL2,PGLYRP1,NT5E,NTHL1,OGG1,PDE1B,NCAN,CSPG4,CST3,PRKCD,MAPK7,AMDHD2,NUDT18,RACK1,RAPGEF3,SDC4,NAGK,SGSH,BCAN,SLC9A1,FUCA1,NT5C1A,GPC1,GPD1,NEU4,MLYCD,SMUG1,HSPG2,IDUA,PYCR3
GO: Biological Process	GO:0001933	negative regulation of protein phosphorylation		9.008E-4	1.000E0	3.324E-2	3.196E-1	62	426	MEN1,ADORA2A,MLLT1,AKT1,LEMD2,APOE,FLCN,HYAL2,BAX,NOS1,CTDSP1,CCNB1,PEBP1,CDKN1A,CDKN2D,PHB,CACTIN,SLC9A3R1,MAPK8IP1,DDIT4,PPP5C,CSK,PRKCD,MAPK7,PARD6A,TESC,MVP,DUSP4,DUSP8,DVL1,CTDSP2,FBXO31,KIRREL1,SPRY2,SOCS7,FBLN1,RACK1,PPP1R1B,FEM1A,CIB1,SHB,HEXIM1,RGS14,INPP5J,ZGPAT,GADD45G,SRCIN1,PTPN5,GSTP1,SH3BP5L,PARK7,PPP1R15A,UCHL1,FLRT1,HSPB1,YWHAG,LRRTM1,JUN,LRRC4B,CAMK2N2,SPRY4,LRP5
GO: Biological Process	GO:0044265	cellular macromolecule catabolic process		2.828E-8	2.379E-4	3.350E-6	3.221E-5	148	977	CLPP,KCTD13,BAP1,OSBPL7,AKT1,AMFR,ANXA2,ENC1,APOE,KHSRP,CCAR2,LSM2,AUP1,BAX,RPL10A,SQSTM1,CCNB1,CCNF,FURIN,CD81,CDC34,ANAPC2,LSM4,EXOSC4,RPL36,RNF166,UBQLN2,FBXL14,GTPBP1,PPP1R8,GTPBP2,CSNK1D,CST3,CTNNB1,DHX34,EIF4A3,PSMA7,PSMB5,PSMB6,PSMB8,PSMB10,PSMC3,PSMD3,PSMD4,KEAP1,PTBP1,RGP1,DFFA,FBXO10,KLHL21,DNASE2,DXO,DVL1,UPF1,RNH1,FBXO31,KCTD10,RNF41,MRTO4,ENDOG,RPL3,RPL6,RPL7A,RPL8,RPL11,RPL15,RPL18,…
GO: Biological Process	GO:0033043	regulation of organelle organization		9.161E-4	1.000E0	3.365E-2	3.236E-1	148	1186	BAP1,MEN1,ADPRH,AKT1,PREX1,DOC2B,VPS18,SLC25A5,ANXA2,BMF,DBNL,ARF6,SPTBN4,ARHGDIA,ARL2,FHOD1,FLCN,MYH9,HRK,BAD,BAX,CDK5R1,PYGO2,IER3,SQSTM1,WRAP73,NOS1,HAP1,CALR,CAMK2B,CCNB1,CCNF,PEBP1,CHMP1A,RCC1,PIK3R2,PLXNB1,TOMM7,ARHGEF19,UBQLN2,KANK2,SH2B1,TBC1D13,TBC1D10B,CELSR1,DYNLL2,PRKCD,TMED9,CTBP1,KDM4A,CTNNB1,MAP2K2,DAPK3,DAXX,DBN1,PTBP1,AURKAIP1,PIH1D1,MUL1,HDAC5,PARP3,FIS1,VPS37B,ARPC1B,GRTP1,MAP1…
Disease	C0007758	Cerebellar Ataxia	DisGeNET Curated	6.382E-5	5.837E-1	3.434E-2	3.330E-1	64	453	AK1,AKT1,ASL,ATP1A3,BCKDHA,CCND1,NDUFA1,NDUFA2,NDUFV1,NDUFS6,NDUFS8,EIF2B4,EIF2B2,OGG1,NANS,PDYN,PEX10,PEX16,GMPPB,PLEKHG4,POLD1,MPDU1,NDUFAF3,POLR1C,CSTB,PEX5,DLG4,BSCL2,ENO2,CWF19L1,RPL27A,STUB1,WDR81,SDHB,SDHC,DLGAP4,NPC2,SLC2A1,PEX26,SLC9A1,SMARCB1,FTL,UQCRQ,GAA,KIF1C,GAMT,SPR,GFAP,GJB1,MLC1,SURF1,GRN,LMNB2,TGM2,UCHL1,HSPB1,WFS1,ATCAY,TWNK,XRCC1,ZIC1,KCNA3,COQ8A,GJC2
GO: Biological Process	GO:0007219	Notch signaling pathway		9.457E-4	1.000E0	3.459E-2	3.325E-1	31	177	MDK,MFNG,MMP14,DLK2,NFKBIA,NOTCH1,NOTCH2,NOTCH4,CCN3,NLE1,EPN1,CHAC1,DLL4,DTX1,SLC35C2,APH1A,EGFL7,RPS27A,HIF1AN,PERP,STAT3,PTP4A3,TIMP4,UBC,MIB2,JAG2,GDPD5,KCNA5,DLL1,LFNG,LLGL1
GO: Biological Process	GO:0016072	rRNA metabolic process		6.587E-15	5.541E-11	3.463E-12	3.330E-11	70	267	WDR18,DHX37,NOB1,RPL10A,BYSL,SNU13,RRP9,ABT1,NOC4L,TSR3,EXOSC4,MRM2,RPL36,DDX49,CSNK1D,FBLL1,EIF4A3,MRTO4,IMP3,RPL3,RPL6,RPL7A,RPL8,RBFA,RPL11,RPL15,RPL18,RPL27,RPL27A,RPL28,RPL31,RPL35A,RPL37,RPL37A,RPL39,RPL41,RPLP0,RPLP1,RPLP2,FBL,RPS2,RPS3,RPS4X,RPS5,RPS8,RPS9,RPS10,RPS12,RPS15,RPS15A,RPS16,RPS20,RPS21,RPS23,RPS26,RPS27A,RPS28,RPS29,NPM3,FAU,EMG1,NHP2,TBL3,NSUN5,PDCD11,RRP7A,BOP1,NOL6,EXOSC5,…
GO: Biological Process	GO:1901605	alpha-amino acid metabolic process		9.592E-4	1.000E0	3.493E-2	3.358E-1	40	247	MPST,ASL,BCAT2,EIF2B4,EIF2B2,NOS1,NOS3,CAD,CBS,KYAT1,PFAS,CKB,PYCR2,PLOD1,COMT,CRYM,PRODH,EIF4A3,PHGDH,SARDH,QDPR,EGLN2,ASPG,FPGS,SHMT2,SLC19A1,GAD1,GAMT,SPR,GART,SLC46A1,ALDH1L1,GCSH,ICMT,PARK7,HMGCL,ATCAY,IVD,PYCR3,ADSSL1
Disease	C0038379	Strabismus	DisGeNET Curated	6.887E-5	6.299E-1	3.499E-2	3.394E-1	45	287	ADSL,FGFRL1,NDUFA1,NDUFA2,NDUFV1,NDUFS6,NDUFS8,NOTCH1,AP4M1,PEX10,CHAT,PEX16,ECEL1,TMCO1,GMPPB,NDUFB11,DLL4,MPDU1,NDUFAF3,POLR1C,CRYBB1,CTBP1,CTNNB1,MAP2K2,DDOST,PEX5,MAFB,RET,RFC2,ELN,EVC,FANCE,FGFR1,FLII,SIX3,PEX26,SMARCB1,SURF1,TGFBI,HRAS,HSPG2,CLIP2,ZIC1,LAMB2,LIMK1
GO: Molecular Function	GO:0002020	protease binding		2.450E-4	5.608E-1	3.505E-2	2.914E-1	24	115	AMFR,ANXA2,FADD,FURIN,CST3,CSTB,NDUFS7,ECM1,RYR1,SYVN1,TYSND1,ADRM1,TIMP2,TIMP4,TNFRSF1A,PARK7,UBC,HSPA1A,HSPA1B,HSPG2,VWF,TWNK,BAG6,LRP1
GO: Biological Process	GO:0030490	maturation of SSU-rRNA		9.682E-4	1.000E0	3.511E-2	3.375E-1	12	45	NOB1,BYSL,SNU13,ABT1,NOC4L,TSR3,RPS8,RPS16,RPS21,EMG1,TBL3,RPSA
GO: Biological Process	GO:0009144	purine nucleoside triphosphate metabolic process		2.632E-9	2.214E-5	3.514E-7	3.379E-6	59	271	MIF,AK1,ALDOA,AMPD2,GADD45GIP1,UQCC3,NUDT1,FLCN,ATP5F1D,ATP5F1E,ATP5MC2,ATP5MC3,ATP5ME,ATP6V1B2,ATP5PO,BAD,NDUFA1,NDUFA2,NDUFA3,NDUFA6,NDUFA8,NDUFB2,NDUFB6,NDUFB7,NDUFB8,NDUFB10,NDUFV1,NDUFS6,NDUFS8,NDUFV3,IER3,NME2,PFKL,UQCR10,NDUFB11,DDIT4,COX5B,NDUFS7,NME6,ENO1,ENO2,TCIRG1,SDHC,SIRT6,ATP5MG,OGDHL,UQCRQ,GALK1,STAT3,NDUFA12,SURF1,UQCR11,GPD1,GUK1,PARK7,UQCRC1,HSPA1A,HSPA1B,NDUFA11
GO: Biological Process	GO:0007417	central nervous system development		5.901E-5	4.964E-1	3.520E-3	3.385E-2	135	1002	MDK,MEN1,FZD1,ADORA2A,AKT1,ULK1,MPST,APLP1,MBD3,SPTBN4,MT3,IRS2,MDGA1,AXL,BAD,BAX,BCR,CDK5R1,LDB1,PYGO2,EIF2B4,EIF2B2,BYSL,NNAT,MYRF,NOTCH1,NRGN,HAP1,NT5E,CBS,OXTR,PAFAH1B3,NUMBL,ADGRG1,ABT1,CKB,CNP,DDIT4,DLL4,POU3F1,POU3F4,ADGRA2,CRH,THOC6,PITPNM1,SLC32A1,NCOR2,CELSR1,CSK,NCAN,KDM4A,CTNNB1,DBI,PHGDH,SEMA4C,PEX5,MAFB,OLIG1,RAC3,RAN,ROGDI,SAMD4B,COX17,SEZ6L2,MAP1S,OLIG2,SEZ6,HDAC11,LAMC3,SOCS7,CIT…
GO: Cellular Component	GO:0005753	mitochondrial proton-transporting ATP synthase complex		2.504E-3	1.000E0	3.523E-2	2.646E-1	7	21	ATP5F1D,ATP5F1E,ATP5MC2,ATP5MC3,ATP5ME,ATP5PO,ATP5MG
GO: Cellular Component	GO:0030176	integral component of endoplasmic reticulum membrane		2.554E-3	1.000E0	3.545E-2	2.663E-1	24	137	AMFR,AUP1,CALR,DPM3,ATF6B,FITM2,EMC10,DPAGT1,EMC9,BSCL2,RTN2,SYVN1,SREBF2,DGAT2,TAP1,TAP2,TAPBP,TEX261,HLA-A,HLA-E,FKBP8,HSPA5,WFS1,PIGS
GO: Biological Process	GO:1902531	regulation of intracellular signal transduction		9.887E-4	1.000E0	3.570E-2	3.432E-1	212	1781	KCTD13,MEN1,FZD8,ADRA2A,ADRA2C,MIF,MAP3K10,AKT1,C1QTNF1,ARHGEF37,PREX1,BMF,LEMD2,DBNL,CASTOR2,APOE,MBD3,ARF6,RHOB,RHOC,RHOG,ARHGDIA,ARHGDIG,MT3,LAMTOR4,GLIPR2,FLCN,CCAR2,IRS2,HYAL2,AXL,PELI3,BAD,FADD,BAX,BCR,SYNGAP1,CDK5R1,IER3,SQSTM1,NFKBIA,NFKBIB,NOS1,NOTCH1,NOTCH2,CCN3,DIRAS1,HAP1,CALR,AIP,MAP3K6,CBS,TMED4,PEBP1,HGS,CD81,CDC34,ARHGAP33,CDKN2D,ADGRG1,CHD3,PHB,TAOK2,SLC9A3R2,SLC9A3R1,PIK3CD,PIK3…
GO: Biological Process	GO:0048699	generation of neurons		4.335E-6	3.647E-2	3.575E-4	3.437E-3	201	1528	GPRIN1,SLC12A5,FZD1,FZD8,ADORA2A,UNC5A,ADRA2C,MIF,DISP3,IGSF9,AKT1,NLGN2,ULK1,PREX1,LRFN1,FOXO6,GIT1,ENC1,DBNL,APOE,FUOM,CPNE5,BLOC1S2,ARF6,SPTBN4,ARHGDIA,MT3,MDGA1,AXL,ADGRB1,BAX,NBL1,SYNGAP1,CDK5R1,LDB1,EIF2B2,BYSL,NNAT,NME2,NOS1,NOTCH1,DDR1,HAP1,CALR,CAMK2B,CTDSP1,PALM,NUMBL,ADGRG1,CHAT,ABT1,SLC9A3R1,ANAPC2,NTN1,PLXNA1,CNP,PLXNB1,DDIT4,DLL4,MINK1,POU3F4,CELSR1,NSMF,CSPG4,DYNLL2,KDM4A,PRKCSH,CT…
GO: Cellular Component	GO:0043005	neuron projection		6.984E-10	7.173E-7	3.586E-8	2.694E-7	178	1194	CYGB,LMTK3,GPRIN1,ADCYAP1R1,SLC12A5,FZD1,ADORA2A,UNC5A,ADRA2C,GRK2,AK1,IGSF9,NLGN2,ULK1,PREX1,BEGAIN,MPST,AMFR,ADCY4,GIT1,CNIH2,HCN3,DBNL,APOE,CPNE5,BLOC1S2,KHSRP,SPTBN4,MT3,ASL,ATF4,ATP1A3,FADD,HCN2,SYNGAP1,CDK5R1,EIF2B2,CACNA1H,NOS1,CCN3,CAD,NRGN,HAP1,CAMK2B,NTS,PEBP1,PALM,PCDH8,PDYN,CHAT,CBARP,TAOK2,AP1S1,LSM4,EPN1,TXN2,PNOC,MAPK8IP1,COMT,MINK1,ZNF385A,CRH,SLC32A1,RIN1,NSMF,PPP5C,CSNK1D,CST3,C…
GO: Biological Process	GO:0019083	viral transcription		7.248E-15	6.097E-11	3.587E-12	3.449E-11	54	176	RPL10A,NOTCH1,RPL36,POLR2E,POLR2I,POLR2K,POLR2L,RPL3,RPL6,RPL7A,RPL8,RPL11,RPL15,RPL18,RPL27,RPL27A,RPL28,RPL31,RPL35A,RPL37,RPL37A,RPL39,RPL41,RPLP0,RPLP1,RPLP2,RPS2,RPS3,RPS4X,RPS5,RPS8,RPS9,RPS10,RPS12,RPS15,RPS15A,RPS16,RPS20,RPS21,RPS23,RPS26,RPS27A,RPS28,RPS29,FAU,IFITM3,MON1B,TRIM32,SMARCB1,USF2,JUN,TRIM8,NELFE,RPSA
GO: Cellular Component	GO:0030135	coated vesicle		2.623E-3	1.000E0	3.592E-2	2.698E-1	37	241	AP2A1,AP2A2,VPS18,MCFD2,CNIH2,DBNL,AP1M1,NRGN,HIP1R,FURIN,AP1S1,AP2S1,SLC32A1,SEC24C,TMED9,DVL1,DVL2,TNK2,HAX1,SEC13,SCAP,FZD2,GAD1,SREBF1,SREBF2,MLC1,TEX261,HLA-A,COPE,HLA-E,VWF,IDUA,TMEM199,LMAN2L,FZD5,LRP1,LYZ
Disease	C0026827	Muscle hypotonia	DisGeNET Curated	7.587E-5	6.939E-1	3.652E-2	3.542E-1	77	575	ACADS,ACADVL,ACY1,ADSL,ALAD,DCHS1,BCKDHA,NDUFA1,NDUFA2,NDUFV1,NDUFS6,NDUFS8,SYNGAP1,EIF2B4,EIF2B2,CAD,NANS,PEX10,SLC25A3,AP1S1,PEX16,GMPPB,PLOD1,COL1A2,COMT,MPDU1,NDUFAF3,SEC24C,CTNNB1,MAP2K2,PRODH,PSAP,DDOST,PEX5,DMPK,QDPR,DPAGT1,SCO2,RET,RFC2,ELN,CWF19L1,APC2,RYR1,FOXG1,FLII,NPC2,SIX3,PEX26,SMARCB1,UQCRQ,FUCA1,GAA,SPARC,GCSH,AHDC1,SURF1,GP1BB,MLYCD,KPTN,THRA,HSD17B10,HADH,HBA2,TNXB,TUBB2A,SLC35…
GO: Cellular Component	GO:0031301	integral component of organelle membrane		2.707E-3	1.000E0	3.659E-2	2.748E-1	42	283	MFNG,AMFR,LEMD2,UQCC3,AUP1,PEX11A,CALR,DPM3,PEX10,PEX16,TOMM7,ATF6B,FITM2,EMC10,DMPK,MUL1,DPAGT1,EMC9,FIS1,BSCL2,RTN2,SLC22A17,SLC8B1,CHST12,ST3GAL2,PEX26,SYVN1,SREBF2,DGAT2,TAP1,TAP2,TAPBP,TEX261,ATP13A2,HLA-A,HLA-E,FKBP8,HSPA5,WFS1,PIGS,RHOT2,LFNG
GO: Cellular Component	GO:0005743	mitochondrial inner membrane		1.070E-8	1.099E-5	3.662E-7	2.751E-6	89	507	ACADVL,MDH2,SLC25A29,MPST,SLC25A5,MRPL15,UQCC3,ATP5F1D,ATP5F1E,ATP5MC2,ATP5MC3,ATP5ME,ATP5PO,CDS2,NDUFA1,NDUFA2,NDUFA3,NDUFA6,NDUFA8,NDUFB2,NDUFB6,NDUFB7,NDUFB8,NDUFB10,NDUFV1,NDUFS6,NDUFS8,NDUFV3,UQCR10,PHB,SLC25A3,CNP,NDUFB11,COX5B,NDUFAF3,SLC25A10,PRODH,ROMO1,NDUFS7,SLC25A38,AURKAIP1,SCO2,SLC25A42,MRPS16,PAM16,SLC25A51,MRPS18A,MRPL4,SLC25A22,MRPS7,MTG1,MRPL12,MRPS12,RPS3,SLC25A34,MRPL27,SLC8B1…
GO: Molecular Function	GO:0003723	RNA binding		3.200E-11	7.325E-8	3.662E-8	3.045E-7	238	1632	MARS,MAZ,MIF4GD,MDH2,HIST1H4I,LRRC47,METTL1,HIST1H4A,HIST1H4D,HIST1H4F,HIST1H4C,HIST1H4H,ALDOA,SLC25A5,ANXA2,DHX37,APEH,CBX4,KHSRP,CCDC124,MRPL15,NUDT1,JRK,CCAR2,EIF3B,EIF3F,LSM2,EIF3I,SRSF9,EDF1,MYH9,RDM1,NDUFV3,RPL10A,EIF2B4,EIF2B2,BYSL,SNU13,ZNF598,H1FX,CALR,SERPINH1,PEBP1,RRP9,PCBP1,TBRG4,ABT1,CHD3,SCAF1,CACTIN,DDX54,CPSF1,NOC4L,LSM4,PLEC,EXOSC4,CNP,RPL36,DDX49,S100A16,NOP53,NOL12,POLRMT,ZNF3…
GO: Biological Process	GO:0050768	negative regulation of neurogenesis		6.214E-5	5.228E-1	3.681E-3	3.540E-2	49	285	DISP3,ULK1,APOE,FUOM,ARF6,ARHGDIA,MT3,SYNGAP1,CDK5R1,NOTCH1,CALR,CTDSP1,ADGRG1,NTN1,CSPG4,KDM4A,PRKCSH,CTNNB1,CASZ1,SEMA4C,RNF10,RAP1GAP,DTX1,OLIG2,SEZ6,FKBP4,FOXG1,SEMA3F,SEMA6B,CIB1,ATF5,SIX3,SLIT1,INPP5J,NKX6-2,GFAP,STAT3,PRPF19,HLA-A,VIM,WNT7A,WNT7B,ID1,ISL1,SEMA3G,RGMA,ITM2C,DLL1,LRP1
GO: Biological Process	GO:0014002	astrocyte development		1.037E-3	1.000E0	3.692E-2	3.550E-1	8	23	ADORA2A,MT3,LAMC3,SMO,GFAP,VIM,LAMB2,DLL1
GO: Biological Process	GO:0032079	positive regulation of endodeoxyribonuclease activity		1.040E-3	1.000E0	3.692E-2	3.550E-1	3	3	AKT1,PRKCD,RPS3
GO: Biological Process	GO:0006468	protein phosphorylation		1.040E-3	1.000E0	3.692E-2	3.550E-1	230	1952	MATK,ACVR2B,LMTK3,ADCY3,ADCY5,MEN1,FZD1,FZD8,ADORA2A,ADRA2A,ADRA2C,GRK2,MIF,MAP3K10,MLLT1,AKT1,C1QTNF1,ULK1,ADCY4,ANXA2,LEMD2,DBNL,APOE,SPTBN4,MT3,GLIPR2,FLCN,PNCK,IRS2,HYAL2,AXL,BAX,CCND1,BCR,SYNGAP1,CDK5R1,SQSTM1,NME2,NOS1,DDR1,CAD,DIRAS1,CAMK2B,CTDSP1,MAP3K6,CBS,CCNB1,CCND3,OXTR,PEBP1,HGS,DYRK1B,CD81,CDKN1A,CDKN2D,TBRG4,GLYCTK,PHB,TAOK2,CACTIN,SLC9A3R1,CAMKV,PIM1,PIK3CD,SNX15,NENF,MAPK8IP1,DDI…
GO: Biological Process	GO:1903706	regulation of hemopoiesis		1.044E-3	1.000E0	3.692E-2	3.550E-1	55	370	HIST1H4I,AP2A2,HIST1H4A,HIST1H4D,HIST1H4F,HIST1H4C,HIST1H4H,MMP14,TMEM176B,FLCN,AXL,BAD,FADD,LDB1,NFKBIA,C1QC,NME2,NOTCH1,NOTCH2,PGLYRP1,PIM1,SOX13,CARTPT,P4HTM,CTNNB1,MAFB,TESC,RARG,DTX1,RBP1,EGR3,RNF41,ESRRA,TMEM176A,ANKRD54,ZBTB7A,FES,HAX1,FOXJ1,CIB1,SHB,GAS2L1,KLF13,PCID2,SOD1,TOB2,CARMIL2,ADRM1,NFAM1,PRMT1,INHA,ITPKB,JAK3,JUN,DLL1
GO: Biological Process	GO:0001736	establishment of planar polarity		1.045E-3	1.000E0	3.692E-2	3.550E-1	24	126	FZD1,AP2A1,AP2A2,DCHS1,AP2S1,ARHGEF19,CELSR1,PSMA7,PSMB5,PSMB6,PSMB8,PSMB10,PSMC3,PSMD3,PSMD4,PARD6A,DVL1,DVL2,RPS27A,FUZ,FZD2,UBC,WNT7B,FZD5
GO: Biological Process	GO:0043603	cellular amide metabolic process		1.363E-12	1.147E-8	3.700E-10	3.557E-9	170	1023	ACACB,MARS,MIF4GD,LRRC47,AKT1,SLC25A29,SLC25A5,ENC1,APEH,APLP1,APOE,GADD45GIP1,MRPL15,ORMDL2,ASL,ATF4,EIF3B,EIF3F,EIF3I,RPL10A,SLC5A6,EIF2B4,EIF2B2,SNU13,CAD,HAP1,CALR,FURIN,SLC25A3,GDAP1L1,CLIC1,CHAC1,RPL36,ZNF385A,GTPBP1,PARS2,NCOR2,GTPBP2,SLC25A10,PRKCD,MAP2K2,EIF4A3,DAPK3,PTBP1,SLC25A38,AURKAIP1,SARDH,CARS2,FAM57B,RAN,SLC25A42,ASPG,MRPS16,UPF1,SLC25A51,DALRD3,MRPS18A,MRPL4,SLC25A22,MRPS7,EEF1…
Disease	C1458155	Mammary Neoplasms	DisGeNET Curated	8.091E-5	7.400E-1	3.700E-2	3.588E-1	215	1953	HIST1H4I,BAP1,MFGE8,HIST1H2BE,HIST1H2BC,AP2A1,HIST1H4A,HIST1H4D,HIST1H4F,HIST1H4C,HIST1H4H,MIF,AKT1,ALDOA,MMP14,MMP17,LTBP4,PREX1,ANXA2,APEH,KHSRP,ARF6,MT1A,ARHGDIA,MT2A,MT3,NUDT1,CCAR2,IRS2,HYAL2,BCL9L,ABCC3,BAX,CCND1,BCR,CDK5R1,NFATC2,BSG,SQSTM1,NFKBIA,NME2,NOS1,NOS3,NOTCH1,NOTCH2,NOTCH4,CCN3,CA12,DDR1,CACNB1,NT5E,CAMK2B,CAPNS1,NTS,CBR3,CCNB1,CCND3,PEBP1,HGS,CD151,CDKN1A,PHB,SLC9A3R2,SLC9A3R1,C…
GO: Biological Process	GO:1901135	carbohydrate derivative metabolic process		3.176E-8	2.672E-4	3.710E-6	3.567E-5	187	1307	ACACB,ADCY3,ADCY5,ADCYAP1R1,ADORA2A,MGAT1,ADRA2A,ADSL,AP2A1,MIF,AK1,AKT1,ALDOA,MPP2,AMPD2,ADCY4,MCFD2,NDST2,APLP1,CHST1,APOE,GADD45GIP1,AKR7A2,MT3,UQCC3,NUDT1,FLCN,HYAL2,ATP5F1D,ATP5F1E,ATP5MC2,ATP5MC3,ATP5ME,ATP6V1B2,ATP5PO,BAD,BAX,NDUFA1,NDUFA2,NDUFA3,NDUFA6,NDUFA8,NDUFB2,NDUFB6,NDUFB7,NDUFB8,NDUFB10,NDUFV1,NDUFS6,NDUFS8,NDUFV3,IER3,NME2,NOS1,NOS3,CAD,PGLYRP1,NT5E,NTHL1,OGG1,CBS,CCND3,NANS,PALM…
GO: Biological Process	GO:0060322	head development		1.056E-3	1.000E0	3.715E-2	3.572E-1	105	802	MDK,MEN1,FZD1,ULK1,APLP1,MBD3,MT3,IRS2,MDGA1,AXL,BAD,BAX,BCR,CDK5R1,LDB1,PYGO2,BYSL,NNAT,NOTCH1,NRGN,HAP1,NT5E,CBS,OXTR,PAFAH1B3,NUMBL,ADGRG1,CKB,CNP,DDIT4,POU3F1,POU3F4,CRH,PITPNM1,SLC32A1,NCOR2,CSK,CTNNB1,MAP2K2,DBI,PHGDH,SEMA4C,PEX5,MAFB,DLX6,RAC3,RAN,ROGDI,RARG,SAMD4B,COX17,SEZ6L2,MAP1S,OLIG2,SEZ6,SOCS7,RAPGEF3,SCN5A,FGFR1,FOXG1,FOXJ1,ATF5,PHLDA1,FPGS,ARX,CCDC85C,BCAN,SIX3,ZNF335,SLIT1,SMO,UQ…
Disease	C0017636	Glioblastoma	DisGeNET Curated	8.566E-5	7.834E-1	3.731E-2	3.618E-1	205	1851	MATK,MAZ,CYGB,MDK,HIST1H4I,HIST1H4A,HIST1H4D,HIST1H4F,HIST1H4C,HIST1H4H,MIF,AKT1,MMP14,MMP15,LTBP4,ANXA2,APOE,KHSRP,RHOC,ASL,DCHS1,IRS2,ABCC3,HRK,AXL,BAD,ADGRB1,FADD,BAX,CCND1,BCR,PYGO2,NFATC2,BSG,SQSTM1,NFKBIA,NOS1,NOTCH1,NOTCH2,CCN3,DDR1,NPTX2,DIRAS1,CALR,CAPNS1,NTS,CBS,CCNB1,CCND3,NANS,CD151,TRMT61A,CDKN1A,SLC9A3R1,PIM1,PIK3CD,PIK3R2,NTN1,PLEC,CNP,DLL4,NOP53,POLD1,CRH,PIM3,NCOR2,PTPA,CSPG4,CST…
GO: Biological Process	GO:0042775	mitochondrial ATP synthesis coupled electron transport		3.247E-8	2.731E-4	3.742E-6	3.597E-5	26	82	UQCC3,NDUFA1,NDUFA2,NDUFA3,NDUFA6,NDUFA8,NDUFB2,NDUFB6,NDUFB7,NDUFB8,NDUFB10,NDUFV1,NDUFS6,NDUFS8,NDUFV3,UQCR10,NDUFB11,COX5B,NDUFS7,SDHC,UQCRQ,NDUFA12,UQCR11,PARK7,UQCRC1,NDUFA11
GO: Biological Process	GO:0065003	protein-containing complex assembly		2.853E-9	2.400E-5	3.750E-7	3.605E-6	252	1825	CLPP,KCTD13,ACACB,ACADS,MCM2,HIST1H4I,TRRAP,MEN1,HIST1H2BE,HIST1H2BC,ADSL,HIST1H4A,HIST1H4D,HIST1H4F,HIST1H4C,HIST1H4H,MIF,C1QTNF1,ALAD,ULK1,ALDOA,PREX1,ALOX5AP,PSMG4,BAHCC1,AMFR,VPS18,MCFD2,ANXA2,CNIH2,BMF,DBNL,APOE,BLOC1S2,ARF6,SPTBN4,ARL2,UQCC3,ASL,EIF3B,EIF3F,LSM2,EIF3I,VAMP8,SRSF9,BCL9L,MYH9,HRK,BAD,FADD,BAX,FGFRL1,NDUFA1,NDUFA2,NDUFA3,NDUFA6,NDUFA8,NDUFB2,NDUFB6,NDUFB7,NDUFB8,NDUFB10,NDUFV1…
GO: Biological Process	GO:0007565	female pregnancy		1.082E-3	1.000E0	3.777E-2	3.632E-1	36	217	MEN1,ADRA2A,ADRA2C,AKT1,BSG,BYSL,NOS1,DDR1,CAD,CBS,OXTR,DEDD,TFCP2L1,EPN1,PNOC,COMT,CRH,DAZAP1,TRIM28,EMP2,RAMP2,RXRA,CITED2,FBLN1,FKBP4,FOSB,SLC19A1,SOD1,GRN,THBD,HLA-A,UCP2,UMPS,SPHK2,ITGB4,LAMB1
GO: Biological Process	GO:0010721	negative regulation of cell development		1.082E-3	1.000E0	3.777E-2	3.632E-1	53	354	DISP3,ULK1,APOE,FUOM,ARF6,ARHGDIA,MT3,SYNGAP1,CDK5R1,NOTCH1,CALR,CTDSP1,ADGRG1,NTN1,CSPG4,KDM4A,PRKCSH,CTNNB1,CASZ1,SEMA4C,RNF10,RAP1GAP,DTX1,OLIG2,SEZ6,FBLN1,FKBP4,FOXG1,SEMA3F,SEMA6B,CIB1,ATF5,SHB,FUZ,SIX3,SLIT1,INPP5J,NKX6-2,GFAP,RCC2,STAT3,PRPF19,HLA-A,VIM,WNT7A,WNT7B,ID1,ISL1,SEMA3G,RGMA,ITM2C,DLL1,LRP1
GO: Biological Process	GO:0051241	negative regulation of multicellular organismal process		1.087E-3	1.000E0	3.777E-2	3.632E-1	141	1127	CYGB,HIST1H4I,MEN1,ADRA2A,ADRA2C,GRK2,HIST1H4A,HIST1H4D,HIST1H4F,HIST1H4C,HIST1H4H,DISP3,FOXO4,C1QTNF1,ULK1,TMEM176B,ANXA2,APOE,FUOM,ARF6,SPTBN4,ARHGDIA,MT3,FLCN,MDGA1,AXL,PELI3,ADGRB1,BCR,SYNGAP1,CDK5R1,LDB1,NFKBIA,NFKBIL1,C1QC,NME2,NOS1,NOS3,NOTCH1,CCN3,PGLYRP1,CALR,CTDSP1,OXTR,FURIN,ADGRG1,CACTIN,NTN1,COMT,DLL4,CRH,CARTPT,FOXP4,CSK,CSPG4,CST3,PRKCD,KDM4A,PRKCSH,CTNNB1,CYBA,DBN1,CASZ1,SEMA4C,RN…
GO: Biological Process	GO:0022904	respiratory electron transport chain		3.356E-8	2.823E-4	3.811E-6	3.664E-5	30	104	UQCC3,NDUFA1,NDUFA2,NDUFA3,NDUFA6,NDUFA8,NDUFB2,NDUFB6,NDUFB7,NDUFB8,NDUFB10,NDUFV1,NDUFS6,NDUFS8,NDUFV3,UQCR10,NDUFB11,COX5B,NDUFS7,SCO2,SDHB,SDHC,MYBBP1A,UQCRQ,NDUFA12,UQCR11,GPD1,PARK7,UQCRC1,NDUFA11
GO: Biological Process	GO:0009057	macromolecule catabolic process		3.398E-8	2.858E-4	3.811E-6	3.664E-5	177	1223	CLPP,KCTD13,BAP1,ADRA2A,OSBPL7,AKT1,AMFR,ANXA2,ENC1,APOE,KHSRP,CCAR2,LSM2,HYAL2,AUP1,BAX,RPL10A,IER3,SQSTM1,PGLYRP1,OAZ1,CCNB1,CCNF,FURIN,HGS,CD81,CDC34,DEDD,PHB,ANAPC2,LSM4,EXOSC4,RPL36,RNF166,UBQLN2,FBXL14,GTPBP1,PPP1R8,GTPBP2,CSNK1D,NCAN,CSPG4,CST3,CTNNB1,DHX34,GGA1,EIF4A3,PSMA7,PSMB5,PSMB6,PSMB8,PSMB10,PSMC3,PSMD3,PSMD4,KEAP1,PTBP1,RGP1,DFFA,FBXO10,KLHL21,PYGB,DNASE2,DXO,EGLN2,DVL1,UPF1,RNH1,…
GO: Cellular Component	GO:0022626	cytosolic ribosome		3.720E-19	3.820E-16	3.820E-16	2.870E-15	48	119	RPL10A,SNU13,RPL36,MRPS18A,MRPL4,MRTO4,RPL3,RPL6,RPL7A,RPL8,RPL11,RPL15,RPL18,RPL27,RPL27A,RPL28,RPL31,RPL35A,RPL36AL,RPL37,RPL37A,RPL39,RPL41,RPLP0,RPLP1,RPLP2,RPS2,RPS3,RPS4X,RPS5,RPS8,RPS9,RPS10,RPS12,RPS15,RPS15A,RPS16,RPS20,RPS21,RPS23,RPS26,RPS27A,RPS28,RPS29,FAU,NHP2,HBA2,RPSA
GO: Biological Process	GO:0009968	negative regulation of signal transduction		6.501E-5	5.469E-1	3.824E-3	3.677E-2	155	1181	KCTD13,MEN1,FZD1,ADRA2A,GRK2,AP2A1,AP2A2,AES,MIF,AKT1,MMP14,MNT,SLC25A5,BMF,LEMD2,CASTOR2,APOE,DLK2,FLCN,CCAR2,HYAL2,BCL9L,PELI3,FADD,BAX,NBL1,FGFRL1,CCND1,SYNGAP1,IER3,NFKBIA,NFKBIB,NFKBIL1,NOS1,NOS3,NOTCH1,NOTCH4,CCN3,CALR,CAMK2B,PEBP1,HGS,PALM,CDC34,CDKN2D,PHB,SLC9A3R2,CACTIN,AP2S1,SLC9A3R1,NLE1,BAMBI,EPN1,CHAC1,MAPK8IP1,DDIT4,UBQLN2,DLL4,ZNF385A,KANK2,ADGRA2,CSK,PRKCD,CTNNB1,MAPK7,KIF26A,EIF4…
GO: Biological Process	GO:0044248	cellular catabolic process		2.012E-10	1.692E-6	3.846E-8	3.698E-7	258	1828	CLPP,ACAA1,KCTD13,ACACB,ACADS,ACADVL,BAP1,MGAT1,ADRA2A,MIF,OSBPL7,AKT1,ULK1,MPST,AMFR,ANXA2,ENC1,APOE,KHSRP,MT3,NUDT1,ASL,FLCN,CCAR2,IRS2,LSM2,ATP6V1B2,AUP1,BAD,BAX,BCAT2,BCKDHA,RPL10A,BLVRB,CDK5R1,IER3,SQSTM1,NOS1,NOS3,NT5E,NTHL1,CAPNS1,OGG1,CBR3,CBS,KYAT1,CCNB1,CCNF,FURIN,CD81,CDC34,PDE1B,PIK3R2,ANAPC2,LSM4,PLCB3,DCTPP1,EXOSC4,CNP,DDIT4,RPL36,RNF166,UBQLN2,COMT,PLEKHF1,FBXL14,POR,ATP6V1G1,GTPBP…
GO: Cellular Component	GO:0044445	cytosolic part		1.885E-14	1.936E-11	3.871E-12	2.908E-11	63	235	BLOC1S2,FADD,RPL10A,SNU13,PFKL,RPL36,PSMC3,MRPS18A,MRPL4,MRTO4,ENO1,ENO2,RPL3,RPL6,RPL7A,RPL8,RPL11,RPL15,RPL18,RPL27,RPL27A,RPL28,RPL31,RPL35A,RPL36AL,RPL37,RPL37A,RPL39,RPL41,RPLP0,RPLP1,RPLP2,RPS2,RPS3,RPS4X,RPS5,RPS8,RPS9,RPS10,RPS12,PI4K2A,RPS15,RPS15A,RPS16,RPS20,RPS21,RPS23,RPS26,RPS27A,RPS28,RPS29,FAU,CCT7,NHP2,GET4,CIAO2B,BLOC1S1,CIAO3,HBA2,HBB,HPS4,BAG6,RPSA
GO: Biological Process	GO:0009156	ribonucleoside monophosphate biosynthetic process		3.892E-7	3.274E-3	3.898E-5	3.748E-4	25	86	ADSL,AK1,ALDOA,AMPD2,UQCC3,FLCN,ATP5F1D,ATP5F1E,ATP5MC2,ATP5MC3,ATP5ME,ATP5PO,CAD,PFAS,UCK1,UCKL1,TCIRG1,ATP5MG,GART,STAT3,SURF1,UMPS,IMPDH1,IMPDH2,ADSSL1
GO: Biological Process	GO:0031345	negative regulation of cell projection organization		1.143E-3	1.000E0	3.958E-2	3.805E-1	31	179	ULK1,APOE,ARF6,ARHGDIA,MT3,SYNGAP1,CDK5R1,NTN1,CSPG4,PRKCD,PRKCSH,SEMA4C,PTPRF,RAP1GAP,SEZ6,SPRY2,FKBP4,SEMA3F,SEMA6B,CIB1,TCHP,SLIT1,INPP5J,GFAP,HLA-A,VIM,ID1,SEMA3G,RGMA,ITM2C,LRP1
Disease	C0027819	Neuroblastoma	DisGeNET Curated	9.524E-5	8.711E-1	3.959E-2	3.840E-1	189	1689	ABCA2,MATK,ACY1,MDK,ADCYAP1R1,MEN1,FZD1,MFGE8,GRK2,MIF,AKT1,ULK1,MMP14,ANXA2,ENC1,APEH,APLP1,APOE,ARF3,KHSRP,ATF4,NPAS4,ABCC3,BAD,BAX,NBL1,CCND1,BCR,BSG,SQSTM1,NNAT,NME2,NOS1,NOTCH1,NOTCH2,NPTX2,NRGN,CALR,CAMK2B,NTS,OAZ1,SERPINH1,CCNB1,NANS,PEBP1,HGS,CD81,CDKN1A,CDKN2D,NUMBL,PDYN,CHAT,PIK3CD,BAMBI,NTN1,ECEL1,SMOX,PNOC,NDUFB11,NOP53,CRH,NCOR2,PTPA,PPP5C,LRP10,GALNT9,CTNNB1,MAPK7,DAPK3,PSMD4,PTBP1,…
GO: Biological Process	GO:0031119	tRNA pseudouridine synthesis		1.153E-3	1.000E0	3.974E-2	3.821E-1	4	6	RPUSD1,RPUSD2,RPUSD3,RPUSD4
GO: Biological Process	GO:0007164	establishment of tissue polarity		1.171E-3	1.000E0	4.021E-2	3.867E-1	24	127	FZD1,AP2A1,AP2A2,DCHS1,AP2S1,ARHGEF19,CELSR1,PSMA7,PSMB5,PSMB6,PSMB8,PSMB10,PSMC3,PSMD3,PSMD4,PARD6A,DVL1,DVL2,RPS27A,FUZ,FZD2,UBC,WNT7B,FZD5
GO: Biological Process	GO:0009168	purine ribonucleoside monophosphate biosynthetic process		4.971E-6	4.182E-2	4.021E-4	3.866E-3	21	74	ADSL,AK1,ALDOA,AMPD2,UQCC3,FLCN,ATP5F1D,ATP5F1E,ATP5MC2,ATP5MC3,ATP5ME,ATP5PO,PFAS,TCIRG1,ATP5MG,GART,STAT3,SURF1,IMPDH1,IMPDH2,ADSSL1
GO: Biological Process	GO:0009127	purine nucleoside monophosphate biosynthetic process		4.971E-6	4.182E-2	4.021E-4	3.866E-3	21	74	ADSL,AK1,ALDOA,AMPD2,UQCC3,FLCN,ATP5F1D,ATP5F1E,ATP5MC2,ATP5MC3,ATP5ME,ATP5PO,PFAS,TCIRG1,ATP5MG,GART,STAT3,SURF1,IMPDH1,IMPDH2,ADSSL1
GO: Cellular Component	GO:0098798	mitochondrial protein complex		1.261E-8	1.295E-5	4.050E-7	3.042E-6	38	149	TOMM5,UQCC3,ATP5F1D,ATP5F1E,ATP5MC2,ATP5MC3,ATP5ME,ATP5PO,BAX,BCKDHA,NDUFA1,NDUFA2,NDUFA3,NDUFA6,NDUFA8,NDUFB2,NDUFB6,NDUFB7,NDUFB8,NDUFB10,NDUFV1,NDUFS6,NDUFS8,NDUFV3,UQCR10,NDUFB11,TOMM7,NDUFS7,PAM16,TOMM40L,SDHB,SDHC,ATP5MG,TIMM50,NDUFA12,PARK7,UQCRC1,NDUFA11
GO: Cellular Component	GO:0005746	mitochondrial respiratory chain		1.262E-8	1.296E-5	4.050E-7	3.042E-6	25	75	UQCC3,NDUFA1,NDUFA2,NDUFA3,NDUFA6,NDUFA8,NDUFB2,NDUFB6,NDUFB7,NDUFB8,NDUFB10,NDUFV1,NDUFS6,NDUFS8,NDUFV3,UQCR10,NDUFB11,NDUFS7,SDHB,SDHC,NDUFA12,SURF1,PARK7,UQCRC1,NDUFA11
GO: Biological Process	GO:0009167	purine ribonucleoside monophosphate metabolic process		1.926E-11	1.621E-7	4.051E-9	3.895E-8	65	279	ADSL,MIF,AK1,ALDOA,MPP2,AMPD2,GADD45GIP1,UQCC3,FLCN,ATP5F1D,ATP5F1E,ATP5MC2,ATP5MC3,ATP5ME,ATP6V1B2,ATP5PO,BAD,NDUFA1,NDUFA2,NDUFA3,NDUFA6,NDUFA8,NDUFB2,NDUFB6,NDUFB7,NDUFB8,NDUFB10,NDUFV1,NDUFS6,NDUFS8,NDUFV3,IER3,NT5E,PFAS,PFKL,UQCR10,NDUFB11,DDIT4,COX5B,NDUFS7,DLG4,ENO1,ENO2,TCIRG1,SDHC,SIRT6,ATP5MG,OGDHL,UQCRQ,GALK1,GART,STAT3,NDUFA12,SURF1,UQCR11,GPD1,GUK1,PARK7,UQCRC1,HSPA1A,HSPA1B,NDUFA11,…
GO: Biological Process	GO:0031175	neuron projection development		6.979E-5	5.870E-1	4.077E-3	3.920E-2	129	953	GPRIN1,SLC12A5,ADORA2A,UNC5A,MIF,IGSF9,AKT1,NLGN2,ULK1,PREX1,LRFN1,FOXO6,GIT1,ENC1,DBNL,APOE,CPNE5,BLOC1S2,ARF6,SPTBN4,ARHGDIA,MT3,ADGRB1,NBL1,SYNGAP1,CDK5R1,EIF2B2,NME2,NOTCH1,DDR1,HAP1,CAMK2B,PALM,NUMBL,CHAT,ANAPC2,NTN1,PLXNA1,CNP,PLXNB1,MINK1,NSMF,CSPG4,PRKCSH,MAP2K2,KIF26A,LRFN3,DBN1,PTBP1,PHGDH,SEMA4C,PTPRF,NECTIN1,DLG4,NYAP1,MUL1,RAC3,DVL1,RET,EFNB3,MAP1S,FBXO31,SEZ6,KATNB1,LINGO3,TPBGL,RXR…
GO: Biological Process	GO:0044403	symbiont process		2.241E-10	1.885E-6	4.097E-8	3.940E-7	135	808	MFGE8,GRK2,VPS18,SLC25A5,APOE,GADD45GIP1,EIF3B,EIF3F,VAMP8,HYAL2,AXL,BAD,FADD,BAX,BANF1,RPL10A,SQSTM1,NFKBIA,AP1M1,NOTCH1,PGLYRP1,FURIN,CD81,PCBP1,CHMP1A,RCC1,RPL36,POLR2E,POLR2I,POLR2K,POLR2L,THOC6,CTBP1,KDM4A,PSMA7,PSMB5,PSMB6,PSMB8,PSMB10,PSMC3,DAXX,PTBP1,PARD6A,UCKL1,NECTIN1,RAN,ACOT8,CHMP6,NLRX1,E4F1,VPS37B,EFNB3,TRIM28,EPHA2,RPL3,RPL6,RPL7A,RPL8,RPL11,RPL15,RPL18,RPL27,RPL27A,RPL28,RPL31,RP…
GO: Biological Process	GO:0044419	interspecies interaction between organisms		2.241E-10	1.885E-6	4.097E-8	3.940E-7	135	808	MFGE8,GRK2,VPS18,SLC25A5,APOE,GADD45GIP1,EIF3B,EIF3F,VAMP8,HYAL2,AXL,BAD,FADD,BAX,BANF1,RPL10A,SQSTM1,NFKBIA,AP1M1,NOTCH1,PGLYRP1,FURIN,CD81,PCBP1,CHMP1A,RCC1,RPL36,POLR2E,POLR2I,POLR2K,POLR2L,THOC6,CTBP1,KDM4A,PSMA7,PSMB5,PSMB6,PSMB8,PSMB10,PSMC3,DAXX,PTBP1,PARD6A,UCKL1,NECTIN1,RAN,ACOT8,CHMP6,NLRX1,E4F1,VPS37B,EFNB3,TRIM28,EPHA2,RPL3,RPL6,RPL7A,RPL8,RPL11,RPL15,RPL18,RPL27,RPL27A,RPL28,RPL31,RP…
GO: Molecular Function	GO:0005102	signaling receptor binding		3.066E-4	7.017E-1	4.128E-2	3.432E-1	196	1601	MATK,MDK,FZD1,FZD8,ADORA2A,MFGE8,ADRA2A,ADRA2C,GRK2,MIF,NLGN2,MMP14,LTBP4,APLP1,APOE,IRS2,ATP1A3,HYAL2,FADD,CDK5R1,SQSTM1,NOTCH1,NOTCH4,CCN3,PGLYRP1,HAP1,CALR,NTS,AIP,CCNB1,PEBP1,PALM,CD81,CD151,PDYN,PHB,SLC9A3R2,SLC9A3R1,NRXN2,PIK3R2,DDX54,PSMC3IP,BAMBI,HOMER3,NENF,PLXNB1,CHAC1,CNTFR,PNOC,DLL4,CORT,CXCL14,CRH,CARTPT,NCOR2,TRAF4,PTPA,CSK,IPO13,CTNNB1,PSAP,SNX17,DAXX,DBI,SEMA4C,PTPN14,PTPRF,NECTIN…
GO: Biological Process	GO:0090150	establishment of protein localization to membrane		1.081E-13	9.091E-10	4.132E-11	3.973E-10	85	377	AKT1,ANXA2,BMF,ARF6,SPTBN4,RHOG,RANGRF,BAD,BAX,RPL10A,CDK5R1,BSG,CACNB1,PALM,RAB11B,SRPRB,TAOK2,SLC9A3R1,PIK3R2,PEX16,TOMM7,RPL36,SYNE3,CSK,DYNLL2,PEX5,TESC,FIS1,ARFRP1,EPHA2,RPL3,RPL6,RPL7A,RPL8,RPL11,RPL15,RPL18,RPL27,RPL27A,RPL28,RPL31,RPL35A,RPL37,RPL37A,RPL39,RPL41,RPLP0,RPLP1,RPLP2,RPS2,RPS3,RPS4X,RPS5,RPS8,RPS9,RPS10,RPS12,RPS15,RPS15A,RPS16,RPS20,RPS21,RPS23,RPS26,RPS27A,RPS28,RPS29,FAU,R…
GO: Biological Process	GO:0034620	cellular response to unfolded protein		7.125E-5	5.994E-1	4.134E-3	3.974E-2	28	133	ACADVL,AMFR,ATF4,BAX,CCND1,CALR,SRPRB,ATF6B,KLHDC3,DCTN1,CTDSP2,PDIA6,STUB1,CXXC1,RACK1,HYOU1,SYVN1,MYDGF,TMBIM6,TLN1,SEC61G,PPP1R15A,SDF2L1,HSPA1A,HSPA5,WFS1,ZBTB17,LMNA
GO: Biological Process	GO:0060291	long-term synaptic potentiation		1.228E-3	1.000E0	4.176E-2	4.015E-1	15	65	NOS1,NRGN,CAMK2B,CRH,SYT12,DBI,RGS14,SLC8A2,GFAP,STX4,PTPN5,HTR6,SHANK3,LRRTM1,ITPR3
GO: Biological Process	GO:0070125	mitochondrial translational elongation		1.228E-3	1.000E0	4.176E-2	4.015E-1	18	85	GADD45GIP1,MRPL15,AURKAIP1,MRPS16,MRPS18A,MRPL4,MRPS7,MRPL12,MRPS12,MRPL27,MRPL28,MRPL17,TUFM,MRPL14,MRPS24,MRPL38,MRPL9,MRPL52
GO: Biological Process	GO:0060071	Wnt signaling pathway, planar cell polarity pathway		1.231E-3	1.000E0	4.176E-2	4.015E-1	22	113	FZD1,AP2A1,AP2A2,AP2S1,ARHGEF19,CELSR1,PSMA7,PSMB5,PSMB6,PSMB8,PSMB10,PSMC3,PSMD3,PSMD4,PARD6A,DVL1,DVL2,RPS27A,FZD2,UBC,WNT7B,FZD5
GO: Molecular Function	GO:0044877	protein-containing complex binding		1.467E-6	3.358E-3	4.197E-4	3.489E-3	214	1626	GTPBP6,MAZ,ACVR2B,MBD6,TRRAP,BAP1,MEN1,MFGE8,ADRA2A,AP2A1,AP2A2,MIF,FOXO4,C1QTNF1,ULK1,MMP14,KIF17,LTBP4,MNT,BAHCC1,AMFR,ADCY4,GIT1,DBNL,CBX4,APOE,MBD3,FLCN,CCAR2,IRS2,ATP5F1D,MYH9,ATP5PO,FADD,BAX,BCKDHA,CCND1,NDUFA8,HCN2,LDB1,PYGO2,NFATC2,NFKBIA,NME2,FMNL1,NOTCH1,CCN3,DDR1,CALR,SERPINH1,OGG1,CCNB1,CD81,CD151,PBX2,CDKN1A,LRWD1,ADGRG1,RCC1,SRPRB,SLC25A3,SLC9A3R1,PIM1,PLCB2,TXN2,POLD1,NCOR2,SYNE3,P…
Disease	C0007134	Renal Cell Carcinoma	DisGeNET Curated	1.063E-4	9.718E-1	4.225E-2	4.098E-1	143	1224	MCM2,ACY1,BAP1,FZD8,AKT1,ALAD,MMP14,TMEM176B,SLC25A5,ANXA2,PPFIA4,NOB1,APEH,APOE,SPTBN4,MT1A,FLCN,IRS2,VAMP8,ATP5MC2,ABCC3,AXL,FADD,CCND1,CDK5R1,BSG,SQSTM1,NME2,NOS1,CCN3,CA12,PGLYRP1,OGG1,CCNB1,PEBP1,PCDH8,CHMP1A,CDKN1A,RCC1,SLC25A3,SLC9A3R2,TFCP2L1,SLC9A3R1,PIK3CD,NTN1,CNN2,PLXNB1,YIPF3,COMT,KANK2,CST3,SCUBE3,PRKCD,TMED9,CTNNB1,PRODH,INTS1,PSMB6,PSMB8,KEAP1,PTBP1,PTH1R,NQO1,SARDH,MVP,MUL1,EGLN2…
GO: Cellular Component	GO:0042825	TAP complex		3.243E-3	1.000E0	4.270E-2	3.208E-1	3	4	TAP1,TAP2,TAPBP
GO: Cellular Component	GO:0043625	delta DNA polymerase complex		3.243E-3	1.000E0	4.270E-2	3.208E-1	3	4	POLD4,POLD1,POLD2
GO: Cellular Component	GO:0005741	mitochondrial outer membrane		3.289E-3	1.000E0	4.276E-2	3.212E-1	28	171	ACACB,TOMM5,BMF,MT3,ASL,ATP5MC2,ATP5MC3,BAD,BAX,NOS1,PEBP1,PHB,CNP,TOMM7,DMPK,MUL1,NLRX1,FIS1,TOMM40L,HAX1,MIEF2,VAT1,COASY,SARM1,PPP1R15A,CPT1C,RHOT2,QTRT1
GO: Biological Process	GO:0071495	cellular response to endogenous stimulus		1.266E-3	1.000E0	4.277E-2	4.113E-1	157	1278	ACVR2B,ADCY3,ADCY5,MEN1,FZD1,ADRA2A,AKT1,FOXO4,LTBP4,ADCY4,HCN3,KLF15,APLP1,MT3,LAMTOR4,FLCN,IRS2,ATP1A3,NPAS4,HYAL2,BCL9L,ATP6V1B2,BAD,NBL1,FGFRL1,HCN2,CACNA1H,NOS1,NOS3,NOTCH1,NOTCH2,CAD,CALR,NTS,OXTR,FURIN,FIBP,CD81,ATP6V1F,PHB,PIK3R2,DDX54,BAMBI,PLOD1,COL1A2,DDIT4,DLL4,POLR2E,POLR2I,POLR2K,POLR2L,POR,ATP6V1G1,KANK2,CRH,NSMF,PPP5C,SOGA1,CSK,CSNK1D,IPO13,PRKCD,CTNNB1,MAPK7,CYBA,EIF4A3,DAXX,PTBP…
GO: Biological Process	GO:0006082	organic acid metabolic process		7.510E-5	6.317E-1	4.285E-3	4.120E-2	149	1131	ACAA1,ACACB,ACADS,ACADVL,MARS,CYGB,ACY1,MDH2,LRRC47,MIF,AKT1,ALDOA,ALOX5AP,MPST,MCFD2,NDST2,CHST1,ASL,ATF4,IRS2,BCAT2,BCKDHA,NDUFS6,IER3,BSG,SLC5A6,EIF2B4,EIF2B2,NOS1,NOS3,CAD,OAZ1,CBR1,CBS,KYAT1,PCK2,PFAS,PFKL,CKB,GRHPR,PYCR2,PLOD1,DDIT4,COMT,POR,FADS6,PARS2,CRYM,ACOT11,NCAN,CSPG4,CTNNB1,PRODH,EIF4A3,PSMA7,PSMB5,PSMB6,PSMB8,PSMB10,PSMC3,PSMD3,PSMD4,SPOCK2,DBI,KEAP1,PHGDH,NQO1,PEX5,SARDH,CARS2,CH…
GO: Biological Process	GO:1901137	carbohydrate derivative biosynthetic process		7.542E-5	6.344E-1	4.285E-3	4.120E-2	109	781	ACACB,ADCY3,ADCY5,ADCYAP1R1,ADORA2A,MGAT1,ADRA2A,ADSL,AP2A1,AK1,ALDOA,AMPD2,ADCY4,MCFD2,NDST2,APLP1,CHST1,APOE,MT3,UQCC3,FLCN,ATP5F1D,ATP5F1E,ATP5MC2,ATP5MC3,ATP5ME,ATP5PO,NME2,NOS1,NOS3,CAD,NT5E,CCND3,NANS,PALM,DPM3,PFAS,GMPPB,UAP1L1,PMM1,MPDU1,CRH,GALNT9,NCAN,CSPG4,PRKCSH,CTNNB1,UCK1,DDOST,CANT1,UCKL1,CHPF,DPAGT1,ACOT8,PARP3,AMDHD2,SLC35C2,PANK4,NME6,NAGPA,DCXR,RAMP2,TCIRG1,CHST12,SDC4,NAGK,NUD…
GO: Biological Process	GO:0099536	synaptic signaling		7.563E-5	6.362E-1	4.285E-3	4.120E-2	98	687	SLC12A5,ADORA2A,GRK2,AKT1,NLGN2,DOC2B,LRFN1,PPFIA4,CNIH2,APOE,PPFIA3,NPAS4,SYNGAP1,CDK5R1,BAIAP3,NOS1,CACNB1,NPTX2,NRGN,HAP1,CAMK2B,OXTR,PEBP1,PCDH8,PDYN,CHAT,NRXN2,ANAPC2,PLCB3,CNP,PNOC,CORT,MINK1,CRH,SLC32A1,CARTPT,RIN1,CELSR1,NSMF,CTNNB1,CLSTN3,SYT12,EIF4A3,LRFN3,DBI,DBN1,PTPRF,SV2A,NQO1,DLG4,DMPK,RAC3,SLC12A6,DVL1,TPGS1,CACNG7,EGR3,EIF4EBP2,SEZ6,BAIAP2,CX3CL1,BCAN,RGS14,SLC8A2,SLC12A4,BRSK1,G…
GO: Biological Process	GO:0010648	negative regulation of cell communication		7.590E-5	6.384E-1	4.285E-3	4.120E-2	171	1328	KCTD13,MEN1,FZD1,ADRA2A,ADRA2C,GRK2,AP2A1,AP2A2,AES,MIF,AKT1,MMP14,MNT,SLC25A5,CNIH2,BMF,LEMD2,CASTOR2,APOE,DLK2,FLCN,CCAR2,HYAL2,BCL9L,PELI3,FADD,BAX,NBL1,FGFRL1,CCND1,SYNGAP1,IER3,NFKBIA,NFKBIB,NFKBIL1,NOS1,NOS3,NOTCH1,NOTCH4,CCN3,CALR,CAMK2B,PEBP1,HGS,PALM,CDC34,CDKN2D,PFKL,PHB,SLC9A3R2,CACTIN,AP2S1,SLC9A3R1,NLE1,BAMBI,EPN1,CHAC1,MAPK8IP1,DDIT4,UBQLN2,DLL4,ZNF385A,KANK2,ADGRA2,CRH,CARTPT,PIM3,…
GO: Biological Process	GO:0035641	locomotory exploration behavior		1.288E-3	1.000E0	4.301E-2	4.135E-1	6	14	NLGN2,CRH,DLG4,GAD1,C12orf10,SHANK3
GO: Biological Process	GO:2000303	regulation of ceramide biosynthetic process		1.288E-3	1.000E0	4.301E-2	4.135E-1	6	14	ORMDL2,PRKCD,RACK1,SMPD2,TNFRSF1A,ORMDL3
GO: Biological Process	GO:0035640	exploration behavior		1.288E-3	1.000E0	4.301E-2	4.135E-1	9	29	NLGN2,CRH,EIF4A3,DLG4,GAD1,PTPN5,C12orf10,SHANK3,LRRTM1
GO: Cellular Component	GO:0005732	small nucleolar ribonucleoprotein complex		3.373E-3	1.000E0	4.330E-2	3.253E-1	7	22	SNU13,RRP9,FBLL1,FBL,NHP2,LSM7,SNRPG
GO: Biological Process	GO:0090407	organophosphate biosynthetic process		1.310E-3	1.000E0	4.345E-2	4.177E-1	83	613	ACACB,ADCY3,ADCY5,ADCYAP1R1,ADORA2A,ADRA2A,ADSL,AK1,ALDOA,AMPD2,ADCY4,APLP1,APOE,PDXK,ARF3,UQCC3,FLCN,IRS2,ATP5F1D,ATP5F1E,ATP5MC2,ATP5MC3,ATP5ME,ATP5PO,CDS2,NME2,NOS1,NOS3,CAD,NT5E,PALM,DPM3,PFAS,CHAT,PIK3CD,PIK3R2,CRH,FITM2,UCK1,PTH1R,UCKL1,PCYT2,PANK4,NME6,DCXR,RAMP2,PI4K2A,TCIRG1,CDIPT,FGFR1,ISYNA1,AGPAT1,PIGV,FGF22,ATP5MG,COASY,INPP5J,GART,STAT3,RUNDC3A,SURF1,GNAI2,GNG7,PIGO,GPD1,TIMP2,GUK1,…
GO: Biological Process	GO:0050804	modulation of chemical synaptic transmission		1.312E-3	1.000E0	4.345E-2	4.177E-1	53	357	ADORA2A,NLGN2,CNIH2,APOE,PPFIA3,SYNGAP1,NOS1,NRGN,HAP1,CAMK2B,OXTR,PEBP1,CHAT,ANAPC2,MINK1,CRH,RIN1,CELSR1,NSMF,CLSTN3,SYT12,EIF4A3,DBI,DBN1,DLG4,DMPK,DVL1,CACNG7,EIF4EBP2,BAIAP2,BCAN,RGS14,SLC8A2,JPH4,SRF,GFAP,NCDN,STX4,GNAI2,GRM4,NCS1,PTPN5,NISCH,MAPK8IP2,HRAS,VGF,HTR1B,HTR6,WNT7A,YWHAG,SHANK3,LRRTM1,ITPR3
GO: Biological Process	GO:0010769	regulation of cell morphogenesis involved in differentiation		1.342E-3	1.000E0	4.426E-2	4.255E-1	55	374	MCRIP1,ULK1,PREX1,APOE,ARHGDIA,MT3,GLIPR2,BCL9L,SYNGAP1,CDK5R1,EIF2B2,NOTCH1,CALR,CAMK2B,NUMBL,ANAPC2,BAMBI,NTN1,PLXNA1,PLXNB1,NSMF,CTNNB1,MAP2K2,DBN1,SEMA4C,PTPRF,RAC3,RET,FBXO31,TPBGL,FBLN1,BAIAP2,SEMA3F,SEMA6B,ZNF703,CIB1,FUZ,SLIT1,SARM1,SRF,RCC2,STK11,PHLDB1,OBSL1,TRIOBP,SRCIN1,PLXNB2,VIM,WNT7A,ID1,SHANK3,SEMA3G,RGMA,LIMK1,RND2
GO: Biological Process	GO:1901575	organic substance catabolic process		2.483E-10	2.089E-6	4.445E-8	4.273E-7	267	1910	CLPP,ACAA1,KCTD13,ACACB,ACADS,ACADVL,BAP1,MGAT1,ADRA2A,MIF,OSBPL7,AKT1,ALDH2,ALDOA,MPST,AMFR,ANXA2,ENC1,APOE,KHSRP,MT3,NUDT1,ASL,CCAR2,IRS2,LSM2,HYAL2,AUP1,BAD,BAX,BCAT2,BCKDHA,RPL10A,BLVRB,IER3,SQSTM1,NOS1,NOS3,PGLYRP1,NT5E,NTHL1,OAZ1,OGG1,CBR3,CBS,KYAT1,CCNB1,CCNF,FURIN,HGS,PAFAH1B3,CD81,CDC34,DEDD,PDE1B,GLYCTK,PFKL,PHB,ANAPC2,LSM4,PLCB2,PLCB3,SMOX,DCTPP1,EXOSC4,CNP,DDIT4,RPL36,RNF166,UBQLN2,CO…
GO: Biological Process	GO:0006915	apoptotic process		7.957E-5	6.693E-1	4.462E-3	4.290E-2	236	1923	DPF1,MDK,MEN1,ADORA2A,UNC5A,AES,MIF,MAP3K10,AKT1,ALDH2,MNT,SLC25A5,BMF,MAGEH1,APLP1,CBX4,APOE,BLOC1S2,PDXK,ARF6,RHOB,ARHGDIA,MT3,FLCN,CCAR2,ATF4,IRS2,HYAL2,HRK,AXL,PELI3,BAD,FADD,BAX,SYNGAP1,CDK5R1,IER3,SQSTM1,NFKBIA,NME2,NOS1,NOS3,NOTCH1,NOTCH2,PGLYRP1,CALR,CAMK2B,HIP1R,OGG1,CBS,CDC34,DEDD,CDKN1A,CDKN2D,PDE1B,PHB,TAOK2,TFPT,SLC9A3R1,PIM1,NLE1,NTN1,CHAC1,CNTFR,BRMS1,MAPK8IP1,DDIT4,PLEKHF1,G0S2,PO…
GO: Biological Process	GO:0009119	ribonucleoside metabolic process		2.546E-10	2.142E-6	4.462E-8	4.290E-7	79	391	ACACB,ADSL,MIF,AK1,ALDOA,MPP2,AMPD2,GADD45GIP1,UQCC3,FLCN,ATP5F1D,ATP5F1E,ATP5MC2,ATP5MC3,ATP5ME,ATP6V1B2,ATP5PO,BAD,NDUFA1,NDUFA2,NDUFA3,NDUFA6,NDUFA8,NDUFB2,NDUFB6,NDUFB7,NDUFB8,NDUFB10,NDUFV1,NDUFS6,NDUFS8,NDUFV3,IER3,NME2,CAD,NT5E,PFKL,UQCR10,NDUFB11,DDIT4,COX5B,NDUFS7,UCK1,UCKL1,DLG4,PANK4,NME6,ENO1,ENO2,NUDT18,TCIRG1,SDHC,SIRT6,ATP5MG,OGDHL,UQCRQ,COASY,GALK1,GAMT,STAT3,NT5C1A,NDUFA12,SURF1,…
GO: Biological Process	GO:0051338	regulation of transferase activity		1.361E-3	1.000E0	4.473E-2	4.301E-1	127	1006	ACVR2B,ADCY3,ADCY5,MEN1,FZD8,ADORA2A,ADRA2A,ADRA2C,MIF,MAP3K10,MLLT1,AKT1,ADCY4,DBNL,APOE,MT3,IRS2,HYAL2,BAD,BAX,CCND1,CDK5R1,LDB1,DIRAS1,MAP3K6,CBS,CCNB1,CCND3,HGS,CD81,CDKN1A,CDKN2D,TAOK2,SLC9A3R1,PIM1,PIK3R2,ANAPC2,MAPK8IP1,CARTPT,TRAF4,CSK,CSPG4,PRKCD,CTNNB1,MAPK7,MAP2K2,PSMA7,PSMB5,PSMB6,PSMB8,PSMB10,PSMC3,PSMD3,PSMD4,DAXX,CHTF8,TESC,PIH1D1,MVP,MUL1,DUSP4,DUSP8,DVL1,DVL2,RFC2,FBXO31,EMP2,SPR…
GO: Cellular Component	GO:0031968	organelle outer membrane		3.545E-3	1.000E0	4.494E-2	3.376E-1	31	196	ACACB,TOMM5,BMF,MT3,ASL,ATP5MC2,ATP5MC3,BAD,BAX,NOS1,PEBP1,PHB,CNP,TOMM7,SYNE3,RETSAT,DMPK,MUL1,NLRX1,FIS1,TOMM40L,HAX1,MIEF2,VAT1,COASY,SARM1,PPP1R15A,CPT1C,ITPR3,RHOT2,QTRT1
GO: Biological Process	GO:0090175	regulation of establishment of planar polarity		1.388E-3	1.000E0	4.543E-2	4.368E-1	22	114	FZD1,AP2A1,AP2A2,AP2S1,ARHGEF19,CELSR1,PSMA7,PSMB5,PSMB6,PSMB8,PSMB10,PSMC3,PSMD3,PSMD4,PARD6A,DVL1,DVL2,RPS27A,FZD2,UBC,WNT7B,FZD5
GO: Cellular Component	GO:0031300	intrinsic component of organelle membrane		3.630E-3	1.000E0	4.546E-2	3.415E-1	43	296	MFNG,AMFR,LEMD2,UQCC3,AUP1,PEX11A,CALR,DPM3,PEX10,PEX16,TOMM7,ATF6B,FITM2,EMC10,DMPK,MUL1,DPAGT1,EMC9,FIS1,BSCL2,RTN2,SLC22A17,SLC8B1,CHST12,ST3GAL2,PEX26,SYVN1,SREBF2,DGAT2,TAP1,TAP2,TAPBP,TEX261,ATP13A2,PGAP3,HLA-A,HLA-E,FKBP8,HSPA5,WFS1,PIGS,RHOT2,LFNG
GO: Biological Process	GO:0048167	regulation of synaptic plasticity		8.200E-5	6.898E-1	4.568E-3	4.392E-2	33	169	ADORA2A,APOE,PPFIA3,SYNGAP1,NOS1,NRGN,CAMK2B,ANAPC2,CRH,RIN1,NSMF,SYT12,DBI,DBN1,DLG4,EIF4EBP2,BAIAP2,BCAN,RGS14,SLC8A2,JPH4,SRF,GFAP,NCDN,STX4,PTPN5,HRAS,VGF,HTR6,YWHAG,SHANK3,LRRTM1,ITPR3
GO: Cellular Component	GO:0071682	endocytic vesicle lumen		3.694E-3	1.000E0	4.571E-2	3.434E-1	6	17	APOE,CALR,HYOU1,SPARC,HBA2,HBB
GO: Cellular Component	GO:1990204	oxidoreductase complex		1.474E-8	1.513E-5	4.586E-7	3.445E-6	29	97	UQCC3,BCKDHA,NDUFA1,NDUFA2,NDUFA3,NDUFA6,NDUFA8,NDUFB2,NDUFB6,NDUFB7,NDUFB8,NDUFB10,NDUFV1,NDUFS6,NDUFS8,NDUFV3,UQCR10,NDUFB11,CYBA,NDUFS7,SDHB,SDHC,OGDHL,GCSH,NDUFA12,GPD1,PARK7,UQCRC1,NDUFA11
GO: Biological Process	GO:0035967	cellular response to topologically incorrect protein		8.308E-5	6.989E-1	4.598E-3	4.421E-2	29	141	ACADVL,AMFR,ATF4,BAX,CCND1,CALR,SRPRB,ATF6B,KLHDC3,DCTN1,CTDSP2,PDIA6,STUB1,CXXC1,RACK1,HYOU1,RNF126,SYVN1,MYDGF,TMBIM6,TLN1,SEC61G,PPP1R15A,SDF2L1,HSPA1A,HSPA5,WFS1,ZBTB17,LMNA
GO: Biological Process	GO:0006297	nucleotide-excision repair, DNA gap filling		1.423E-3	1.000E0	4.611E-2	4.433E-1	8	24	POLD4,POLD1,POLD2,RFC2,RPA2,RPS27A,UBC,XRCC1
GO: Biological Process	GO:0036003	positive regulation of transcription from RNA polymerase II promoter in response to stress		1.423E-3	1.000E0	4.611E-2	4.433E-1	8	24	MT3,ATF4,NOTCH1,ATF6B,MAPK7,KLF2,GCN1,HSPA5
GO: Biological Process	GO:0051291	protein heterooligomerization		1.425E-3	1.000E0	4.611E-2	4.433E-1	27	151	HIST1H4I,HIST1H4A,HIST1H4D,HIST1H4F,HIST1H4C,HIST1H4H,C1QTNF1,ANXA2,FADD,FGFRL1,SQSTM1,COL1A2,COL6A2,PPP5C,SCUBE3,PRKCSH,CTNNB1,TMEM120A,STK11,GNA11,TNFRSF1A,HBA2,HBB,HRAS,ITPR3,JUP,KCNH2
GO: Cellular Component	GO:0005740	mitochondrial envelope		5.408E-12	5.554E-9	4.628E-10	3.477E-9	129	736	ACACB,ACADS,ACADVL,MDH2,TOMM5,SLC25A29,MPST,SLC25A5,BMF,ARL2,MT3,MRPL15,UQCC3,ASL,ATP5F1D,ATP5F1E,ATP5MC2,ATP5MC3,ATP5ME,ATP5PO,CDS2,BAD,BAX,NDUFA1,NDUFA2,NDUFA3,NDUFA6,NDUFA8,NDUFB2,NDUFB6,NDUFB7,NDUFB8,NDUFB10,NDUFV1,NDUFS6,NDUFS8,NDUFV3,NME2,NOS1,NRGN,PEBP1,UQCR10,PHB,SLC25A3,CNP,MAPK8IP1,NDUFB11,TOMM7,COX5B,NDUFAF3,SLC25A10,PRODH,ROMO1,NDUFS7,SLC25A38,AURKAIP1,DMPK,MUL1,SCO2,SLC25A42,NLRX1,MR…
Disease	C4020899	Autosomal recessive predisposition	DisGeNET Curated	5.095E-7	4.660E-3	4.660E-3	4.519E-2	178	1445	CLPP,ACADS,ACADVL,MARS,ACY1,ADSL,AK1,ALAD,ALDOA,LTBP4,AMPD2,APOE,ARHGDIA,ASL,DCHS1,ATP5F1E,AXL,FADD,BCKDHA,NDUFA1,NDUFA2,BANF1,NDUFV1,NDUFS6,NDUFS8,EIF2B4,EIF2B2,C1QC,CA12,CAD,NT5E,NTHL1,SERPINH1,CBS,NANS,CD81,CD151,AP4M1,PCK2,CHMP1A,DPM3,PEX10,ADGRG1,CHAT,SLC25A3,AP1S1,GRHPR,PEX16,PSMC3IP,ECEL1,PLEC,PYCR2,GMPPB,PLOD1,COL1A2,COL6A2,COL9A2,MPDU1,NDUFAF3,POLR1C,POR,KANK2,CRYBB1,CSTB,PRKCD,PRODH,CYB…
GO: Biological Process	GO:0046322	negative regulation of fatty acid oxidation		1.456E-3	1.000E0	4.674E-2	4.494E-1	5	10	ACACB,ACADVL,AKT1,DBI,DGAT2
GO: Biological Process	GO:0097201	negative regulation of transcription from RNA polymerase II promoter in response to stress		1.456E-3	1.000E0	4.674E-2	4.494E-1	5	10	CITED2,HIF1AN,TMBIM6,PPP1R15A,JUN
GO: Biological Process	GO:0009116	nucleoside metabolic process		3.614E-9	3.040E-5	4.677E-7	4.497E-6	79	413	ACACB,ADSL,MIF,AK1,ALDOA,MPP2,AMPD2,GADD45GIP1,UQCC3,FLCN,ATP5F1D,ATP5F1E,ATP5MC2,ATP5MC3,ATP5ME,ATP6V1B2,ATP5PO,BAD,NDUFA1,NDUFA2,NDUFA3,NDUFA6,NDUFA8,NDUFB2,NDUFB6,NDUFB7,NDUFB8,NDUFB10,NDUFV1,NDUFS6,NDUFS8,NDUFV3,IER3,NME2,CAD,NT5E,PFKL,UQCR10,NDUFB11,DDIT4,COX5B,NDUFS7,UCK1,UCKL1,DLG4,PANK4,NME6,ENO1,ENO2,NUDT18,TCIRG1,SDHC,SIRT6,ATP5MG,OGDHL,UQCRQ,COASY,GALK1,GAMT,STAT3,NT5C1A,NDUFA12,SURF1,…
GO: Biological Process	GO:0045637	regulation of myeloid cell differentiation		1.471E-3	1.000E0	4.704E-2	4.523E-1	34	205	HIST1H4I,HIST1H4A,HIST1H4D,HIST1H4F,HIST1H4C,HIST1H4H,FADD,LDB1,NFKBIA,C1QC,NME2,NOTCH2,CARTPT,P4HTM,CTNNB1,MAFB,TESC,RARG,RBP1,RNF41,ESRRA,ANKRD54,ZBTB7A,FES,HAX1,CIB1,GAS2L1,KLF13,TOB2,PRMT1,INHA,ITPKB,JUN,DLL1
GO: Cellular Component	GO:0016528	sarcoplasm		3.855E-3	1.000E0	4.713E-2	3.541E-1	15	74	ATP2A3,NOS1,CACNB1,CALR,CAMK2B,PLEC,DMPK,RTN2,RYR1,HAX1,CHERP,JPH4,GSN,GSTM2,JSRP1
GO: Molecular Function	GO:0031694	alpha-2A adrenergic receptor binding		4.107E-4	9.402E-1	4.723E-2	3.926E-1	4	5	ADRA2C,GRK2,APLP1,UCHL1
GO: Molecular Function	GO:0015379	potassium:chloride symporter activity		4.107E-4	9.402E-1	4.723E-2	3.926E-1	4	5	SLC12A5,SLC12A6,SLC12A4,SLC12A9
GO: Molecular Function	GO:0031267	small GTPase binding		4.127E-4	9.446E-1	4.723E-2	3.926E-1	48	301	KCTD13,ADCYAP1R1,ADPRH,ULK1,GIT1,ANXA2,RANBP3,ARHGDIA,RANGRF,LSM2,FMNL1,GRASP,TNPO2,TBC1D13,RIN1,TBC1D10B,IPO13,DAPK3,RGP1,RUSC2,PARD6A,PEX5,RABGGTA,RANGAP1,RAP1GAP,DVL1,DVL2,IPO4,EXOC8,GRTP1,TBC1D10A,RNF41,SGSM1,TBC1D16,CIB1,SOD1,RCC2,STX4,EHD1,TRIOBP,CDC42EP1,INF2,CDC42EP4,ARFIP2,RUNDC1,SPHK2,RGL3,LLGL1
GO: Biological Process	GO:0010942	positive regulation of cell death		1.502E-3	1.000E0	4.785E-2	4.601E-1	92	695	MEN1,ADORA2A,AES,MAP3K10,AKT1,BMF,APOE,RHOB,MT3,FLCN,CCAR2,ATF4,HYAL2,HRK,BAD,FADD,BAX,CDK5R1,SQSTM1,NOS1,NOS3,NOTCH1,NOTCH2,CAMK2B,CDC34,CDKN1A,TFPT,SLC9A3R1,BRMS1,DDIT4,PLEKHF1,G0S2,CRH,PTPA,DYNLL2,PRKCD,CTNNB1,PRODH,DAPK3,DAXX,DFFA,PTPRF,NQO1,MUL1,RAD9A,RARG,PDCD6,FIS1,RET,APH1A,ENDOG,RPS3,KATNB1,RPS27A,RPS29,RXRA,RACK1,MYBBP1A,PHLDA1,SIVA1,RBCK1,PIAS4,BEX3,SLC9A1,SMPD2,SOD1,TRIM35,GADD45G,TEX…
GO: Biological Process	GO:0045859	regulation of protein kinase activity		1.513E-3	1.000E0	4.804E-2	4.619E-1	101	775	ACVR2B,ADCY3,ADCY5,MEN1,FZD8,ADORA2A,ADRA2A,ADRA2C,MIF,MAP3K10,MLLT1,AKT1,ADCY4,DBNL,APOE,MT3,HYAL2,BAX,CCND1,CDK5R1,DIRAS1,MAP3K6,CBS,CCND3,HGS,CD81,CDKN1A,CDKN2D,TAOK2,SLC9A3R1,PIM1,MAPK8IP1,CARTPT,TRAF4,CSK,CSPG4,PRKCD,MAPK7,MAP2K2,DAXX,TESC,PIH1D1,MVP,MUL1,DUSP4,DUSP8,DVL1,DVL2,FBXO31,EMP2,SPRY2,RPLP1,RPS3,RPS27A,ANKRD54,SOCS7,RACK1,PPP1R1B,FGFR1,FEM1A,SDC4,AGAP2,CIB1,CAMKK1,SHB,HEXIM1,CNPPD1…
GO: Cellular Component	GO:0005901	caveola		3.994E-3	1.000E0	4.826E-2	3.626E-1	18	96	ADCYAP1R1,GRK2,RANGRF,CACNA1H,NOS1,NOS3,FXYD1,CAVIN1,CTNNB1,EMP2,EHD2,SCN5A,SLC2A1,SMO,SMPD2,MLC1,KCNA5,SLC27A1
GO: Biological Process	GO:0009150	purine ribonucleotide metabolic process		2.838E-10	2.387E-6	4.872E-8	4.685E-7	99	536	ACACB,ADCY3,ADCY5,ADCYAP1R1,ADORA2A,ADRA2A,ADSL,MIF,AK1,ALDOA,MPP2,AMPD2,ADCY4,APLP1,APOE,GADD45GIP1,UQCC3,FLCN,ATP5F1D,ATP5F1E,ATP5MC2,ATP5MC3,ATP5ME,ATP6V1B2,ATP5PO,BAD,NDUFA1,NDUFA2,NDUFA3,NDUFA6,NDUFA8,NDUFB2,NDUFB6,NDUFB7,NDUFB8,NDUFB10,NDUFV1,NDUFS6,NDUFS8,NDUFV3,IER3,NME2,NOS1,NOS3,NT5E,CBS,PALM,PDE1B,PFAS,PFKL,UQCR10,NDUFB11,DDIT4,COX5B,CRH,MAPK7,NDUFS7,DLG4,PANK4,NME6,ENO1,ENO2,NUDT18,RA…
GO: Biological Process	GO:0010941	regulation of cell death		8.868E-5	7.460E-1	4.876E-3	4.688E-2	206	1650	MDK,ADCYAP1R1,MEN1,ADORA2A,AES,MIF,MAP3K10,AKT1,ULK1,ALDH2,MNT,SLC25A5,MCFD2,BMF,CBX4,APOE,PDXK,RHOB,ARHGDIA,MT3,FLCN,CCAR2,ATF4,IRS2,HYAL2,HRK,AXL,PELI3,BAD,FADD,BAX,SYNGAP1,CDK5R1,IER3,SQSTM1,NFKBIA,NME2,NOS1,NOS3,NOTCH1,NOTCH2,CCN3,CALR,CAMK2B,OGG1,CBS,CDC34,DEDD,CDKN1A,CDKN2D,PHB,TFPT,SLC9A3R1,PIM1,NLE1,CNTFR,BRMS1,MAPK8IP1,DDIT4,PLEKHF1,G0S2,POR,POU3F4,ZNF385A,KANK2,CRH,THOC6,PIM3,TRAF4,PTPA…
GO: Molecular Function	GO:0019901	protein kinase binding		4.476E-4	1.000E0	4.878E-2	4.056E-1	86	620	SLC12A5,ADRA2A,AP2A1,AP2A2,AKT1,ULK1,ARHGDIA,IRS2,LSM2,HYAL2,BAD,CCND1,SYNGAP1,CDK5R1,SQSTM1,CACNB1,DIRAS1,CAMK2B,CCNB1,CCND3,PEBP1,CDKN2D,TAOK2,TFPT,PIK3R2,MAPK8IP1,TRAF4,CSK,CSPG4,PRKCD,PRKCSH,CTNNB1,MAPK7,PPP1R12C,DAXX,PTPN14,PTPRF,PARD6A,SV2A,DLG4,PIH1D1,MVP,RAD9A,SLC12A6,HDAC5,SH2D3C,DVL1,DVL2,EEF2,EMP2,SPRY2,RPS3,RACK1,SCN5A,SDC4,AGAP2,CIB1,RBCK1,CNPPD1,RGS14,SLC12A4,BRSK1,SREBF1,RCC2,STAT3…
GO: Biological Process	GO:0043069	negative regulation of programmed cell death		1.547E-3	1.000E0	4.894E-2	4.705E-1	117	919	MDK,ADORA2A,MIF,AKT1,ALDH2,MNT,SLC25A5,BMF,CBX4,APOE,PDXK,ARHGDIA,MT3,CCAR2,IRS2,AXL,PELI3,BAD,FADD,BAX,SYNGAP1,IER3,SQSTM1,NFKBIA,NME2,NOS1,NOS3,NOTCH1,NOTCH2,OGG1,CBS,CDKN1A,CDKN2D,PHB,PIM1,NLE1,CNTFR,MAPK8IP1,POR,POU3F4,ZNF385A,KANK2,THOC6,PIM3,VSTM2L,PRKCD,CTNNB1,MAPK7,INTS1,DAXX,DFFA,TMEM161A,NQO1,PIH1D1,RARG,TSC22D3,PAM16,EGR3,STK40,SPRY2,RAMP2,RPS27A,CITED2,RAPGEF3,HAX1,CX3CL1,AGAP2,FLT4,C…
GO: Biological Process	GO:0055086	nucleobase-containing small molecule metabolic process		4.423E-8	3.721E-4	4.896E-6	4.707E-5	121	763	ACACB,MDH2,ADCY3,ADCY5,ADCYAP1R1,ADORA2A,ADRA2A,ADSL,MIF,AK1,ALDOA,MPP2,AMPD2,ADCY4,APLP1,APOE,GADD45GIP1,UQCC3,NUDT1,FLCN,ATP5F1D,ATP5F1E,ATP5MC2,ATP5MC3,ATP5ME,ATP6V1B2,ATP5PO,BAD,NDUFA1,NDUFA2,NDUFA3,NDUFA6,NDUFA8,NDUFB2,NDUFB6,NDUFB7,NDUFB8,NDUFB10,NDUFV1,NDUFS6,NDUFS8,NDUFV3,IER3,NME2,NOS1,NOS3,CAD,NT5E,NTHL1,OGG1,CBS,PALM,PCK2,PDE1B,PFAS,PFKL,UQCR10,PGLS,DCTPP1,CNP,NDUFB11,DDIT4,COX5B,CRH,M…
GO: Cellular Component	GO:0030662	coated vesicle membrane		4.118E-3	1.000E0	4.918E-2	3.694E-1	24	142	AP2A1,AP2A2,MCFD2,CNIH2,DBNL,AP1M1,NRGN,HIP1R,FURIN,AP1S1,AP2S1,SLC32A1,SEC24C,SEC13,SCAP,FZD2,GAD1,SREBF1,SREBF2,HLA-A,COPE,HLA-E,TMEM199,FZD5
GO: Cellular Component	GO:0012506	vesicle membrane		4.184E-3	1.000E0	4.939E-2	3.710E-1	70	535	AP2A1,AP2A2,DISP3,ULK1,MCFD2,CNIH2,DBNL,VAMP8,BSG,SLC5A6,AP1M1,NOS1,NOS3,NRGN,CAMK2B,HIP1R,FURIN,RAB11B,CBARP,TAOK2,AP1S1,AP2S1,CAMKV,SNX15,SLC32A1,SEC24C,CALY,CYBA,SYT12,SNX17,SEMA4C,PTPRN,SV2A,DLG4,TNK2,SNX22,MFSD10,PI4K2A,TCIRG1,RPS27A,SEC13,SCAP,NSG2,SMO,SAYSD1,FZD2,CYB5R1,GAD1,SPARC,SREBF1,SREBF2,GPRC5C,STAB1,SYT5,ATP13A2,HLA-A,COPE,HLA-E,UBC,FLRT1,VGF,WNT7A,WNT7B,YWHAG,TMEM199,FZD5,KIFC3,AG…
GO: Molecular Function	GO:0051087	chaperone binding		2.632E-5	6.024E-2	5.020E-3	4.173E-2	21	82	AMFR,ATP1A3,BAX,CALR,PFDN6,HYOU1,AHSA1,GRPEL1,GET4,GNB5,SYVN1,SOD1,ERP29,TBCC,CDC37,SDF2L1,DNAJB2,HSPA5,HSPE1,VWF,DNLZ
GO: Biological Process	GO:0009199	ribonucleoside triphosphate metabolic process		3.010E-10	2.532E-6	5.064E-8	4.868E-7	61	270	MIF,AK1,ALDOA,AMPD2,GADD45GIP1,UQCC3,FLCN,ATP5F1D,ATP5F1E,ATP5MC2,ATP5MC3,ATP5ME,ATP6V1B2,ATP5PO,BAD,NDUFA1,NDUFA2,NDUFA3,NDUFA6,NDUFA8,NDUFB2,NDUFB6,NDUFB7,NDUFB8,NDUFB10,NDUFV1,NDUFS6,NDUFS8,NDUFV3,IER3,NME2,CAD,PFKL,UQCR10,NDUFB11,DDIT4,COX5B,NDUFS7,UCK1,UCKL1,NME6,ENO1,ENO2,TCIRG1,SDHC,SIRT6,ATP5MG,OGDHL,UQCRQ,GALK1,STAT3,NDUFA12,SURF1,UQCR11,GPD1,GUK1,PARK7,UQCRC1,HSPA1A,HSPA1B,NDUFA11
GO: Biological Process	GO:0009161	ribonucleoside monophosphate metabolic process		1.927E-12	1.621E-8	5.066E-10	4.871E-9	69	291	ADSL,MIF,AK1,ALDOA,MPP2,AMPD2,GADD45GIP1,UQCC3,FLCN,ATP5F1D,ATP5F1E,ATP5MC2,ATP5MC3,ATP5ME,ATP6V1B2,ATP5PO,BAD,NDUFA1,NDUFA2,NDUFA3,NDUFA6,NDUFA8,NDUFB2,NDUFB6,NDUFB7,NDUFB8,NDUFB10,NDUFV1,NDUFS6,NDUFS8,NDUFV3,IER3,CAD,NT5E,PFAS,PFKL,UQCR10,NDUFB11,DDIT4,COX5B,NDUFS7,UCK1,UCKL1,DLG4,ENO1,ENO2,TCIRG1,SDHC,SIRT6,ATP5MG,OGDHL,UQCRQ,GALK1,GART,STAT3,NDUFA12,SURF1,UQCR11,GPD1,GUK1,PARK7,UMPS,UQCRC1,HS…
GO: Molecular Function	GO:0019899	enzyme binding		6.683E-9	1.530E-5	5.099E-6	4.239E-5	261	1929	KCTD13,MCM2,ELFN2,ADCY5,ADCYAP1R1,SLC12A5,FZD8,ADORA2A,ADPRH,ADRA2A,AP2A1,AP2A2,AKT1,FOXO4,ULK1,PREX1,ALOX5AP,AMFR,GIT1,SLC25A5,ANXA2,RANBP3,CBX4,ARF6,SPTBN4,ARHGDIA,RANGRF,CCAR2,IRS2,LSM2,EIF3I,HYAL2,BAD,FADD,CCND1,BCR,SYNGAP1,CDK5R1,LDB1,SQSTM1,NFKBIA,SNU13,NME2,NOS1,NOS3,FMNL1,NOTCH1,NOTCH2,CACNB1,CAD,DIRAS1,CALR,CAMK2B,OAZ1,CBS,GRASP,CCNB1,CCND3,PEBP1,FURIN,CDC34,CDKN1A,CDKN2D,PFKL,SRPRB,PHB,…
GO: Biological Process	GO:0051960	regulation of nervous system development		5.244E-7	4.412E-3	5.190E-5	4.990E-4	131	881	FZD1,ADRA2C,MIF,DISP3,AKT1,NLGN2,ULK1,PREX1,FOXO6,ENC1,APOE,FUOM,CPNE5,ARF6,ARHGDIA,MT3,MDGA1,ADGRB1,NBL1,SYNGAP1,CDK5R1,EIF2B2,NME2,MYRF,NOS1,NOTCH1,HAP1,CALR,CAMK2B,CTDSP1,OXTR,PALM,NUMBL,ADGRG1,ANAPC2,NTN1,PLXNA1,PLXNB1,DLL4,CELSR1,NSMF,CSPG4,KDM4A,PRKCSH,CTNNB1,MAP2K2,CLSTN3,SCRT1,DBN1,PTBP1,CASZ1,SEMA4C,PTPRF,NECTIN1,RNF10,MUL1,RAC3,RAP1GAP,RARG,DTX1,DVL1,DVL2,RET,FBXO31,OLIG2,SEZ6,KATNB1,TP…
GO: Biological Process	GO:0009165	nucleotide biosynthetic process		9.595E-5	8.071E-1	5.241E-3	5.039E-2	53	321	ACACB,ADCY3,ADCY5,ADCYAP1R1,ADORA2A,ADRA2A,ADSL,AK1,ALDOA,AMPD2,ADCY4,APLP1,APOE,UQCC3,FLCN,ATP5F1D,ATP5F1E,ATP5MC2,ATP5MC3,ATP5ME,ATP5PO,NME2,NOS1,NOS3,CAD,NT5E,PALM,PFAS,CRH,UCK1,UCKL1,PANK4,NME6,RAMP2,TCIRG1,ATP5MG,COASY,GART,STAT3,RUNDC3A,SURF1,GNAI2,GNG7,TIMP2,GUK1,NAPRT,HRH3,UMPS,HTR1B,WFS1,IMPDH1,IMPDH2,ADSSL1
GO: Cellular Component	GO:0044391	ribosomal subunit		1.028E-18	1.056E-15	5.281E-16	3.967E-15	59	175	MRPL15,RPL10A,SNU13,RPL36,MRPS16,MRPS18A,MRPS7,MRTO4,IMP3,RPL3,RPL6,RPL7A,RPL8,RPL11,RPL15,RPL18,RPL27,RPL27A,RPL28,RPL31,RPL35A,RPL36AL,RPL37,RPL37A,RPL39,RPL41,RPLP0,RPLP1,RPLP2,MRPL12,MRPS12,RPS2,RPS3,RPS4X,RPS5,RPS8,RPS9,RPS10,RPS12,MRPL27,RPS15,RPS15A,RPS16,RPS20,RPS21,RPS23,RPS26,RPS27A,RPS28,RPS29,FAU,RACK1,MRPL28,NHP2,MRPL17,HBA2,MRPS24,MRPL52,RPSA
GO: Biological Process	GO:0033365	protein localization to organelle		4.834E-8	4.066E-4	5.281E-6	5.077E-5	140	919	TOMM5,BAP1,FZD1,AKT1,BMF,ARF6,ARL2,MT3,LAMTOR4,FLCN,HYAL2,BAD,BAX,RPL10A,NFKBIA,NFKBIB,NFKBIL1,CCN3,CALR,AIP,OGG1,HGS,CD81,CDKN1A,LRWD1,PEX10,SRPRB,SLC9A3R1,PIK3R2,PEX16,BAMBI,TOMM7,RPL36,TNPO2,CSNK1D,DYNLL2,IPO13,PRKCD,CTNNB1,MAPK7,CROCC,KEAP1,KLHL21,PEX5,PIH1D1,RAN,PARP3,DVL1,FIS1,PAM16,IPO4,ARFRP1,TRIM28,NAGPA,RPL3,RPL6,RPL7A,RPL8,RPL11,RPL15,RPL18,RPL27,RPL27A,RPL28,RPL31,RPL35A,RPL37,RPL37A,…
GO: Cellular Component	GO:0030425	dendrite		1.751E-8	1.798E-5	5.290E-7	3.974E-6	99	590	LMTK3,SLC12A5,ADORA2A,GRK2,IGSF9,NLGN2,PREX1,BEGAIN,AMFR,ADCY4,CNIH2,HCN3,DBNL,APOE,KHSRP,MT3,ATP1A3,HCN2,SYNGAP1,CDK5R1,CACNA1H,NOS1,CCN3,NRGN,HAP1,CAMK2B,PALM,PCDH8,PDYN,TAOK2,TXN2,PNOC,MAPK8IP1,COMT,MINK1,ZNF385A,SLC32A1,RIN1,NSMF,PPP5C,CTNNB1,CYBA,LZTS3,EIF4A3,LRFN3,DBN1,DLG4,RANGAP1,RAP1GAP,DVL1,TPGS1,RET,MAP1S,KIRREL1,TNK2,SEZ6,RPL28,GLRX5,RPLP0,RPS3,PI4K2A,RACK1,TRAPPC4,BAIAP2,CIB1,DLGAP4,…
GO: Cellular Component	GO:0097458	neuron part		1.105E-9	1.134E-6	5.402E-8	4.058E-7	218	1545	DPF1,CYGB,LMTK3,GPRIN1,ADCYAP1R1,SLC12A5,FZD1,ADORA2A,UNC5A,ADRA2C,GRK2,AK1,IGSF9,NLGN2,ULK1,KIF17,PREX1,BEGAIN,DOC2B,MPST,AMFR,ADCY4,GIT1,PPFIA4,CNIH2,HCN3,ENC1,DBNL,APOE,PPFIA3,CPNE5,BLOC1S2,KHSRP,SPTBN4,MT3,ASL,ATF4,ATP1A3,FADD,HCN2,SYNGAP1,CDK5R1,EIF2B2,CACNA1H,BAIAP3,NOS1,CCN3,CAD,NRGN,HAP1,CAMK2B,NTS,PEBP1,PALM,PCDH8,RAB11B,PDE1B,PDYN,CHAT,CBARP,TAOK2,SLC9A3R2,AP1S1,SLC9A3R1,NRXN2,LSM4,EPN1…
GO: Biological Process	GO:0044093	positive regulation of molecular function		1.003E-4	8.439E-1	5.445E-3	5.235E-2	232	1893	ACVR2B,ADCY3,ADCY5,ADCYAP1R1,MEN1,FZD1,FZD8,ADORA2A,ADPRH,MFNG,ADRA2A,ADRA2C,MIF,MAP3K10,AKT1,ARHGEF37,MMP14,DOCK6,MMP15,MMP17,PREX1,ALOX5AP,AMFR,ADCY4,GIT1,ANXA2,DBNL,APOE,SPTBN4,RHOC,RHOG,ARHGDIA,ARHGDIG,MT3,LAMTOR4,RANGRF,FLCN,IRS2,EDF1,BAD,FADD,BAX,CCND1,BCR,SYNGAP1,CDK5R1,PYGO2,NFKBIA,NFKBIB,EIF2B4,EIF2B2,NOS1,NOS3,DIRAS1,HAP1,CAMK2B,MAP3K6,CCNB1,CCND3,CD81,ARHGAP33,CDKN1A,RCC1,TAOK2,PIM1,PI…
GO: Cellular Component	GO:0044455	mitochondrial membrane part		1.862E-8	1.912E-5	5.463E-7	4.104E-6	44	189	TOMM5,UQCC3,ATP5F1D,ATP5F1E,ATP5MC2,ATP5MC3,ATP5ME,ATP5PO,NDUFA1,NDUFA2,NDUFA3,NDUFA6,NDUFA8,NDUFB2,NDUFB6,NDUFB7,NDUFB8,NDUFB10,NDUFV1,NDUFS6,NDUFS8,NDUFV3,UQCR10,PHB,NDUFB11,TOMM7,NDUFS7,DMPK,MUL1,FIS1,PAM16,SLC8B1,TOMM40L,SDHB,SDHC,ATP5MG,TIMM50,SARM1,NDUFA12,SURF1,PARK7,UQCRC1,NDUFA11,RHOT2
GO: Biological Process	GO:0034470	ncRNA processing		1.507E-13	1.267E-9	5.510E-11	5.298E-10	88	399	WDR18,METTL1,DHX37,NOB1,RPL10A,BYSL,SNU13,RRP9,TRMT61A,ABT1,TSEN34,CPSF1,NOC4L,TSR3,EXOSC4,MRM2,RPL36,DDX49,CSNK1D,FBLL1,EIF4A3,INTS1,INTS11,MRTO4,IMP3,RPL3,RPL6,RPL7A,RPL8,RBFA,RPL11,RPL15,RPL18,RPL27,RPL27A,RPL28,RPL31,RPL35A,RPL37,RPL37A,RPL39,RPL41,RPLP0,RPLP1,RPLP2,FBL,RPS2,RPS3,RPS4X,RPS5,RPS8,RPS9,RPS10,RPS12,RPS15,RPS15A,RPS16,RPS20,RPS21,RPS23,RPS26,RPS27A,RPS28,RPS29,NPM3,FAU,EMG1,NHP2,…
GO: Biological Process	GO:0006753	nucleoside phosphate metabolic process		4.342E-9	3.652E-5	5.534E-7	5.320E-6	117	702	ACACB,MDH2,ADCY3,ADCY5,ADCYAP1R1,ADORA2A,ADRA2A,ADSL,MIF,AK1,ALDOA,MPP2,AMPD2,ADCY4,APLP1,APOE,GADD45GIP1,UQCC3,NUDT1,FLCN,ATP5F1D,ATP5F1E,ATP5MC2,ATP5MC3,ATP5ME,ATP6V1B2,ATP5PO,BAD,NDUFA1,NDUFA2,NDUFA3,NDUFA6,NDUFA8,NDUFB2,NDUFB6,NDUFB7,NDUFB8,NDUFB10,NDUFV1,NDUFS6,NDUFS8,NDUFV3,IER3,NME2,NOS1,NOS3,CAD,NT5E,NTHL1,OGG1,CBS,PALM,PCK2,PDE1B,PFAS,PFKL,UQCR10,PGLS,DCTPP1,CNP,NDUFB11,DDIT4,COX5B,CRH,M…
GO: Biological Process	GO:0032269	negative regulation of cellular protein metabolic process		1.044E-4	8.779E-1	5.628E-3	5.411E-2	146	1112	LMTK3,ELFN2,MEN1,ADORA2A,MIF,MLLT1,AKT1,ANXA2,ENC1,LEMD2,KLF15,APOE,MT3,FLCN,CCAR2,ATF4,HYAL2,PELI3,BAX,EIF2B4,C4B,NOS1,HAP1,CALR,WFDC1,CTDSP1,SERPINH1,CCNB1,PEBP1,FURIN,CDKN1A,CDKN2D,PHB,CACTIN,SLC9A3R1,ANAPC2,NLE1,CHAC1,MAPK8IP1,DDIT4,POR,NCOR2,PTPA,PPP5C,CSK,CST3,CSTB,PRKCD,CTBP1,KDM4A,CTNNB1,MAPK7,MAP2K2,EIF4A3,PSMA7,INTS1,PSMB5,PSMB6,PSMB8,PSMB10,PSMC3,DAPK3,PSMD3,PSMD4,RGP1,PARD6A,PPP1R37,T…
GO: Cellular Component	GO:1902494	catalytic complex		2.758E-4	2.832E-1	5.664E-3	4.255E-2	137	1077	ABCA2,KCTD13,TRRAP,MEN1,LRRC47,METTL1,ULK1,AMFR,ENC1,CBX4,MBD3,UQCC3,POLD4,ATP1A3,EDF1,AUP1,FADD,BCKDHA,CCND1,NDUFA1,NDUFA2,NDUFA3,NDUFA6,NDUFA8,NDUFB2,NDUFB6,NDUFB7,NDUFB8,NDUFB10,NDUFV1,NDUFS6,NDUFS8,NDUFV3,KLHDC7A,CCND3,CCNF,TRMT61A,CDKN1A,DPM3,CHD3,PFKL,UQCR10,TFPT,PIK3CD,PIK3R2,ANAPC2,TSEN34,FXYD1,BRMS1,NDUFB11,POLD1,POLD2,POLR2E,POLR1C,POLR2I,POLR2K,POLR2L,NCOR2,PTPA,PPP4C,DYNLL2,INO80B,CYB…
GO: Biological Process	GO:0009163	nucleoside biosynthetic process		7.098E-6	5.971E-2	5.687E-4	5.468E-3	30	131	ACACB,ADSL,AK1,ALDOA,UQCC3,FLCN,ATP5F1D,ATP5F1E,ATP5MC2,ATP5MC3,ATP5ME,ATP5PO,NME2,CAD,NT5E,UCK1,UCKL1,PANK4,NME6,TCIRG1,ATP5MG,COASY,STAT3,SURF1,GUK1,UMPS,IMPDH1,IMPDH2,ADSSL1,QTRT1
GO: Biological Process	GO:0051348	negative regulation of transferase activity		1.083E-4	9.114E-1	5.805E-3	5.581E-2	60	378	MEN1,ADORA2A,MLLT1,AKT1,APOE,IRS2,HYAL2,CCNB1,CDKN1A,CDKN2D,ANAPC2,MAPK8IP1,CSK,PRKCD,MAPK7,PSMA7,PSMB5,PSMB6,PSMB8,PSMB10,PSMC3,PSMD3,PSMD4,TESC,MVP,DUSP4,DUSP8,DVL1,FBXO31,SPRY2,RPS27A,SOCS7,FZR1,RACK1,PPP1R1B,FEM1A,CIB1,SHB,ANAPC11,HEXIM1,RGS14,ZGPAT,GADD45G,SRCIN1,PTPN5,GSTP1,SH3BP5L,PARK7,PIK3IP1,UBC,UCHL1,FLRT1,HSPB1,YWHAG,LRRTM1,LRRC4B,CAMK2N2,LIMK1,SPRY4,LRP5
Disease	C0014544	Epilepsy	DisGeNET Curated	1.300E-6	1.189E-2	5.946E-3	5.767E-2	126	962	ACADS,ACY1,SLC12A5,MEN1,MGAT1,ADRA2A,ADSL,AKT1,ALDH2,AMPD2,APOE,ASL,JRK,ATP1A3,BCL9L,FADD,FGFRL1,BCKDHA,NDUFA1,NDUFA2,HCN2,NDUFV1,NDUFS6,NDUFS8,SYNGAP1,EIF2B4,EIF2B2,CACNA1H,CAD,CBS,NANS,AP4M1,PDYN,PEX10,ADGRG1,PIK3CD,PIK3R2,PEX16,GMPPB,NDUFB11,COMT,MPDU1,NDUFAF3,SH2B1,SLC32A1,PTPA,CSTB,CTBP1,PSAP,PTBP1,PHGDH,SV2A,PEX5,DLG4,QDPR,MVP,DPAGT1,SLC12A6,RET,ECM1,SLC25A22,EGR3,IER3IP1,TNK2,BSCL2,ELN,SEZ…
GO: Biological Process	GO:0012501	programmed cell death		1.121E-4	9.427E-1	5.966E-3	5.736E-2	238	1952	DPF1,MDK,MEN1,ADORA2A,UNC5A,AES,MIF,MAP3K10,AKT1,ALDH2,MNT,SLC25A5,BMF,MAGEH1,APLP1,CBX4,APOE,BLOC1S2,PDXK,ARF6,RHOB,ARHGDIA,MT3,FLCN,CCAR2,ATF4,IRS2,HYAL2,HRK,AXL,PELI3,BAD,FADD,BAX,SYNGAP1,CDK5R1,IER3,SQSTM1,NFKBIA,NME2,NOS1,NOS3,NOTCH1,NOTCH2,PGLYRP1,CALR,CAMK2B,HIP1R,OGG1,CBS,CDC34,DEDD,CDKN1A,CDKN2D,PDE1B,PHB,TAOK2,TFPT,SLC9A3R1,PIM1,NLE1,NTN1,CHAC1,CNTFR,BRMS1,MAPK8IP1,DDIT4,PLEKHF1,G0S2,PO…
GO: Biological Process	GO:0006401	RNA catabolic process		1.716E-13	1.443E-9	6.013E-11	5.781E-10	64	247	KHSRP,LSM2,RPL10A,LSM4,EXOSC4,RPL36,GTPBP1,PPP1R8,GTPBP2,DHX34,EIF4A3,PTBP1,DXO,UPF1,RNH1,MRTO4,RPL3,RPL6,RPL7A,RPL8,RPL11,RPL15,RPL18,RPL27,RPL27A,RPL28,RPL31,RPL35A,RPL37,RPL37A,RPL39,RPL41,RPLP0,RPLP1,RPLP2,RPS2,RPS3,RPS4X,RPS5,RPS8,RPS9,RPS10,RPS12,RPS15,RPS15A,RPS16,RPS20,RPS21,RPS23,RPS26,RPS27A,RPS28,RPS29,FAU,FEN1,RNASEH2A,MEX3D,LSM7,AGO2,EDC4,EXOSC5,BTG2,RPSA,SLIRP
GO: Biological Process	GO:0006612	protein targeting to membrane		6.437E-16	5.415E-12	6.016E-13	5.785E-12	59	194	ANXA2,RPL10A,CDK5R1,BSG,CACNB1,PALM,SRPRB,TAOK2,PEX16,RPL36,PEX5,TESC,FIS1,RPL3,RPL6,RPL7A,RPL8,RPL11,RPL15,RPL18,RPL27,RPL27A,RPL28,RPL31,RPL35A,RPL37,RPL37A,RPL39,RPL41,RPLP0,RPLP1,RPLP2,RPS2,RPS3,RPS4X,RPS5,RPS8,RPS9,RPS10,RPS12,RPS15,RPS15A,RPS16,RPS20,RPS21,RPS23,RPS26,RPS27A,RPS28,RPS29,FAU,MIEF2,CIB1,PEX26,SRP54,PACS2,ICMT,ZFAND2B,RPSA
GO: Biological Process	GO:0009142	nucleoside triphosphate biosynthetic process		1.143E-4	9.612E-1	6.045E-3	5.812E-2	19	77	AK1,ALDOA,UQCC3,FLCN,ATP5F1D,ATP5F1E,ATP5MC2,ATP5MC3,ATP5ME,ATP5PO,NME2,CAD,UCK1,UCKL1,NME6,TCIRG1,ATP5MG,STAT3,SURF1
GO: Biological Process	GO:0006396	RNA processing		5.620E-8	4.727E-4	6.061E-6	5.827E-5	139	913	WDR18,METTL1,DHX37,NOB1,APLP1,KHSRP,CCAR2,LSM2,SRSF9,RPL10A,BYSL,SNU13,CCNB1,RRP9,PCBP1,TRMT61A,ABT1,SCAF1,CACTIN,DDX54,TSEN34,CPSF1,NOC4L,LSM4,TSR3,EXOSC4,MRM2,RPL36,DDX49,POLR2E,POLR2I,POLR2K,POLR2L,SYF2,AAR2,THOC6,PPP1R8,NCOR2,CSNK1D,MAP2K2,DHX34,SF3B5,FBLL1,EIF4A3,INTS1,PTBP1,INTS11,SNRNP25,DAZAP1,MRTO4,DDX39A,IMP3,RPL3,RPL6,RPL7A,RPL8,RBFA,RPL11,RPL15,RPL18,RPL27,RPL27A,RPL28,RPL31,RPL35A,SF…
GO: Biological Process	GO:0045047	protein targeting to ER		1.499E-19	1.261E-15	6.306E-16	6.063E-15	45	102	RPL10A,SRPRB,RPL36,RPL3,RPL6,RPL7A,RPL8,RPL11,RPL15,RPL18,RPL27,RPL27A,RPL28,RPL31,RPL35A,RPL37,RPL37A,RPL39,RPL41,RPLP0,RPLP1,RPLP2,RPS2,RPS3,RPS4X,RPS5,RPS8,RPS9,RPS10,RPS12,RPS15,RPS15A,RPS16,RPS20,RPS21,RPS23,RPS26,RPS27A,RPS28,RPS29,FAU,SRP54,SEC61G,ZFAND2B,RPSA
GO: Biological Process	GO:1901293	nucleoside phosphate biosynthetic process		1.226E-4	1.000E0	6.448E-3	6.199E-2	53	324	ACACB,ADCY3,ADCY5,ADCYAP1R1,ADORA2A,ADRA2A,ADSL,AK1,ALDOA,AMPD2,ADCY4,APLP1,APOE,UQCC3,FLCN,ATP5F1D,ATP5F1E,ATP5MC2,ATP5MC3,ATP5ME,ATP5PO,NME2,NOS1,NOS3,CAD,NT5E,PALM,PFAS,CRH,UCK1,UCKL1,PANK4,NME6,RAMP2,TCIRG1,ATP5MG,COASY,GART,STAT3,RUNDC3A,SURF1,GNAI2,GNG7,TIMP2,GUK1,NAPRT,HRH3,UMPS,HTR1B,WFS1,IMPDH1,IMPDH2,ADSSL1
GO: Cellular Component	GO:0005783	endoplasmic reticulum		2.580E-5	2.650E-2	6.463E-4	4.855E-3	212	1706	ADCYAP1R1,OSBPL7,DISP3,ALOX5AP,AMFR,COL20A1,MCFD2,CNIH2,APOE,RHOG,MT3,ORMDL2,RANGRF,ASL,ATP1A3,ATP2A3,HYAL2,AUP1,CDS2,BAX,NDUFB8,NFE2L1,SQSTM1,MYRF,NOS1,NOTCH1,NOTCH2,NOTCH4,CACNB1,HAP1,CALR,CAMK2B,SERPINH1,TMED4,PEBP1,FURIN,DPM3,SRPRB,LMF2,PEX16,TMCO1,PLOD1,TRAPPC6A,COL1A2,MAPK8IP1,COL6A2,COL9A2,MPDU1,SELENOM,CRELD2,POR,ATF6B,PITPNM1,P4HTM,SYNE3,SEC24C,CST3,PRKCD,TMED9,CAVIN1,PRKCSH,MAP2K2,FITM2…
GO: Biological Process	GO:0033108	mitochondrial respiratory chain complex assembly		6.614E-7	5.563E-3	6.469E-5	6.220E-4	23	77	UQCC3,NDUFA1,NDUFA2,NDUFA3,NDUFA6,NDUFA8,NDUFB2,NDUFB6,NDUFB7,NDUFB8,NDUFB10,NDUFV1,NDUFS6,NDUFS8,NDUFV3,UQCR10,NDUFB11,NDUFAF3,NDUFS7,PET100,COA4,NDUFA12,NDUFA11
GO: Biological Process	GO:0006120	mitochondrial electron transport, NADH to ubiquinone		6.091E-8	5.124E-4	6.486E-6	6.236E-5	19	49	NDUFA1,NDUFA2,NDUFA3,NDUFA6,NDUFA8,NDUFB2,NDUFB6,NDUFB7,NDUFB8,NDUFB10,NDUFV1,NDUFS6,NDUFS8,NDUFV3,NDUFB11,NDUFS7,NDUFA12,PARK7,NDUFA11
GO: Biological Process	GO:0070727	cellular macromolecule localization		3.964E-10	3.334E-6	6.538E-8	6.286E-7	239	1676	TOMM5,BAP1,FZD1,ADPRH,AP2A1,AP2A2,AKT1,NLGN2,KIF17,VPS18,ANXA2,RANBP3,BMF,APOE,ARF6,SPTBN4,RHOB,RHOG,ARL2,MT3,LAMTOR4,RANGRF,SSNA1,DCHS1,FLCN,VAMP8,HYAL2,AUP1,BAD,BAX,SYNGAP1,RPL10A,CDK5R1,BSG,NFKBIA,NFKBIB,NFKBIL1,AP1M1,CCN3,CACNB1,CALR,OAZ1,AIP,OGG1,GRASP,CCNB1,HGS,PALM,CD81,AP4M1,CDKN1A,RAB11B,LRWD1,PEX10,SRPRB,TAOK2,AP1S1,AP2S1,SLC9A3R1,NRXN2,PIK3R2,SNX8,PEX16,BAMBI,SNX15,HOMER3,TOMM7,RPL36,T…
GO: Biological Process	GO:0050803	regulation of synapse structure or activity		8.337E-6	7.013E-2	6.616E-4	6.361E-3	50	272	ADORA2A,IGSF9,NLGN2,APOE,PPFIA3,MDGA1,ADGRB1,SYNGAP1,NOS1,NRGN,CAMK2B,OXTR,ANAPC2,CRH,RIN1,NSMF,NCAN,CLSTN3,SYT12,DBI,DBN1,PTPRF,NECTIN1,DLG4,DMPK,EIF4EBP2,BAIAP2,BCAN,RGS14,SLC8A2,SLIT1,JPH4,SRF,GFAP,NCDN,STX4,PTPN5,LRRC24,LRTM2,HRAS,FLRT1,VGF,HTR6,WNT7A,YWHAG,SHANK3,LRRTM1,ITPR3,LRRC4B,LRP5
GO: Cellular Component	GO:0005730	nucleolus		3.329E-4	3.418E-1	6.703E-3	5.035E-2	116	891	ACADVL,MARS,MIF4GD,MBD6,METTL1,MLLT1,DHX37,ENC1,NOB1,MBD3,ARL4D,SRSF9,BCL9L,EDF1,RDM1,RPL10A,BYSL,SNU13,NOS3,H1FX,SELENBP1,TRIM41,TAF1C,RRP9,DEDD,ABT1,CHD3,TAOK2,SLC25A3,TFPT,DDX54,TSEN34,NLE1,NOC4L,SNX15,TXN2,EXOSC4,MRM2,RPL36,S100A16,NOP53,NOL12,POLR2E,POLR1C,POLR2I,POLR2K,POLR2L,ZNF385A,CSTB,KDM4A,INO80B,FBLL1,DAXX,PTBP1,SPATA2,PIH1D1,YPEL3,RAN,GRWD1,SAP30L,MAP1S,TRIM28,MRTO4,IMP3,RPL3,RPL6,RP…
GO: Biological Process	GO:0002181	cytoplasmic translation		8.538E-6	7.182E-2	6.712E-4	6.453E-3	17	54	EIF3B,EIF3F,HAP1,RPL36,ZNF385A,PTBP1,EEF2,MRTO4,RPL6,RPL8,RPL15,RPL31,RPL35A,RPLP0,RPLP1,RPLP2,EIF4H
GO: Biological Process	GO:0010257	NADH dehydrogenase complex assembly		7.032E-7	5.915E-3	6.722E-5	6.463E-4	19	56	NDUFA1,NDUFA2,NDUFA3,NDUFA6,NDUFA8,NDUFB2,NDUFB6,NDUFB7,NDUFB8,NDUFB10,NDUFV1,NDUFS6,NDUFS8,NDUFV3,NDUFB11,NDUFAF3,NDUFS7,NDUFA12,NDUFA11
GO: Biological Process	GO:0032981	mitochondrial respiratory chain complex I assembly		7.032E-7	5.915E-3	6.722E-5	6.463E-4	19	56	NDUFA1,NDUFA2,NDUFA3,NDUFA6,NDUFA8,NDUFB2,NDUFB6,NDUFB7,NDUFB8,NDUFB10,NDUFV1,NDUFS6,NDUFS8,NDUFV3,NDUFB11,NDUFAF3,NDUFS7,NDUFA12,NDUFA11
GO: Biological Process	GO:0042274	ribosomal small subunit biogenesis		8.658E-6	7.283E-2	6.744E-4	6.484E-3	19	65	NOB1,BYSL,SNU13,ABT1,NOC4L,TSR3,MRPS7,RPS2,RPS5,RPS8,RPS10,RPS15,RPS16,RPS21,RPS28,EMG1,TBL3,RRP7A,RPSA
GO: Cellular Component	GO:0022627	cytosolic small ribosomal subunit		8.571E-12	8.802E-9	6.771E-10	5.086E-9	22	44	MRPS18A,RPS2,RPS3,RPS4X,RPS5,RPS8,RPS9,RPS10,RPS12,RPS15,RPS15A,RPS16,RPS20,RPS21,RPS23,RPS26,RPS27A,RPS28,RPS29,FAU,HBA2,RPSA
Disease	C0030567	Parkinson Disease	DisGeNET Curated	2.677E-6	2.448E-2	6.809E-3	6.604E-2	121	928	BAP1,ADORA2A,AES,AKT1,ULK1,ALDH2,DBNL,CHST1,APOE,PDXK,ARF3,NUDT1,LSM2,ATP1A3,SLC41A1,BAX,NBL1,NDUFA1,NDUFA2,CDK5R1,EIF2B4,EIF2B2,C4B,NOS1,NOS3,PGLYRP1,NTS,HIP1R,CCND3,PEBP1,CDKN1A,CDKN2D,PDE1B,PDYN,CHAT,PIK3CD,PNOC,MAPK8IP1,DDIT4,COMT,CSNK1D,CSNK1G2,CST3,PRKCD,DAPK3,DAXX,PTBP1,DCTN1,NQO1,MVP,MUL1,RAN,RET,RING1,MAP1S,RNF41,ENDOG,RPL6,MTG1,STUB1,ESRRA,RPS8,RPS27A,TRAPPC4,CX3CL1,FKBP4,ISYNA1,FOSL2,S…
Disease	C0557874	Global developmental delay	DisGeNET Curated	4.046E-6	3.700E-2	6.809E-3	6.604E-2	102	757	ACADS,ACY1,ADSL,MIF,AKT1,AMPD2,ASL,ATP1A3,FGFRL1,NDUFA1,NDUFA2,BCR,NDUFV1,NDUFS6,NDUFS8,SYNGAP1,CAD,AP4M1,PCDH8,CHMP1A,PEX10,ADGRG1,AP1S1,PIK3R2,PEX16,PYCR2,GMPPB,COMT,MPDU1,NDUFAF3,POLR1C,SH2B1,SEC24C,CTBP1,CTNNB1,MAP2K2,PRODH,PSAP,EIF4A3,CC2D1A,DDOST,PHGDH,PEX5,QDPR,DPAGT1,SLC12A6,SCO2,SH2B3,DVL1,PAM16,RET,IER3IP1,CWF19L1,RPL35A,CDK2AP2,APC2,KATNB1,RPS28,FANCE,FANCF,NRSN2,FGFR1,HAX1,FOXG1,SDHB,…
Disease	C0024667	Animal Mammary Neoplasms	DisGeNET Curated	4.225E-6	3.865E-2	6.809E-3	6.604E-2	30	143	MDH2,ADCY5,MIF,ANXA2,VAMP8,CCND1,PEBP1,FURIN,PHB,COMT,G0S2,NSMF,SLC25A10,DBI,PTBP1,MRC2,RAN,RBP1,ENO1,RPL3,RPL6,SPINT2,STAT3,GNAI2,THRSP,TKT,UCP2,HRAS,ID3,TUBB2B
Disease	C4020875	Mental and motor retardation	DisGeNET Curated	5.212E-6	4.767E-2	6.809E-3	6.604E-2	86	614	ACADS,ACY1,ADSL,AKT1,AMPD2,ASL,ATP1A3,FGFRL1,NDUFA1,NDUFA2,BCR,NDUFV1,NDUFS6,NDUFS8,SYNGAP1,CAD,AP4M1,CHMP1A,PEX10,ADGRG1,AP1S1,PIK3R2,PEX16,PYCR2,GMPPB,COMT,MPDU1,NDUFAF3,POLR1C,SH2B1,SEC24C,CTBP1,CTNNB1,MAP2K2,PRODH,PSAP,EIF4A3,CC2D1A,DDOST,PEX5,QDPR,DPAGT1,SLC12A6,SCO2,DVL1,PAM16,RET,IER3IP1,CWF19L1,RPL35A,APC2,KATNB1,RPS28,FANCE,FANCF,FGFR1,SDHB,SDHC,FLII,PUF60,NPC2,SIX3,NHP2,SLC2A1,PEX26,SLC…
Disease	C1864897	Cognitive delay	DisGeNET Curated	5.212E-6	4.767E-2	6.809E-3	6.604E-2	86	614	ACADS,ACY1,ADSL,AKT1,AMPD2,ASL,ATP1A3,FGFRL1,NDUFA1,NDUFA2,BCR,NDUFV1,NDUFS6,NDUFS8,SYNGAP1,CAD,AP4M1,CHMP1A,PEX10,ADGRG1,AP1S1,PIK3R2,PEX16,PYCR2,GMPPB,COMT,MPDU1,NDUFAF3,POLR1C,SH2B1,SEC24C,CTBP1,CTNNB1,MAP2K2,PRODH,PSAP,EIF4A3,CC2D1A,DDOST,PEX5,QDPR,DPAGT1,SLC12A6,SCO2,DVL1,PAM16,RET,IER3IP1,CWF19L1,RPL35A,APC2,KATNB1,RPS28,FANCE,FANCF,FGFR1,SDHB,SDHC,FLII,PUF60,NPC2,SIX3,NHP2,SLC2A1,PEX26,SLC…
GO: Biological Process	GO:0051093	negative regulation of developmental process		1.318E-4	1.000E0	6.885E-3	6.619E-2	123	914	HIST1H4I,MEN1,HIST1H4A,HIST1H4D,HIST1H4F,HIST1H4C,HIST1H4H,MIF,DISP3,FOXO4,ULK1,TMEM176B,APOE,FUOM,ARF6,ARHGDIA,MT3,FLCN,MDGA1,ADGRB1,CCND1,BCR,SYNGAP1,CDK5R1,LDB1,NFKBIA,C1QC,NME2,NOTCH1,NOTCH4,CCN3,PGLYRP1,CALR,CTDSP1,ADGRG1,NTN1,DLL4,TNPO2,CXCL14,CARTPT,NCOR2,FOXP4,CSPG4,CST3,KDM4A,PRKCSH,CTNNB1,DAXX,PTBP1,CASZ1,SEMA4C,RNF10,MAFB,MUL1,FAM57B,RAP1GAP,RARG,HDAC5,TSC22D3,DTX1,ECM1,EPHA2,OLIG2,SEZ…
GO: Molecular Function	GO:0016651	oxidoreductase activity, acting on NAD(P)H		3.926E-5	8.986E-2	6.912E-3	5.746E-2	24	103	NDUFA1,NDUFA2,NDUFA3,NDUFA6,NDUFA8,NDUFB2,NDUFB6,NDUFB7,NDUFB8,NDUFB10,NDUFV1,NDUFS6,NDUFS8,NDUFV3,CBR1,POR,CYBA,NDUFS7,NQO1,DCXR,CYB5R1,DHRS4,NDUFA12,NXN
GO: Biological Process	GO:0015980	energy derivation by oxidation of organic compounds		1.343E-4	1.000E0	6.976E-3	6.707E-2	48	286	ACADVL,MDH2,ADSL,AKT1,MT3,UQCC3,FLCN,IRS2,BAX,NDUFA1,NDUFA2,NDUFA3,NDUFA6,NDUFA8,NDUFB2,NDUFB6,NDUFB7,NDUFB8,NDUFB10,NDUFV1,NDUFS6,NDUFS8,NDUFV3,TBRG4,UQCR10,NDUFB11,COX5B,NDUFS7,PYGB,SCO2,STK40,NHLRC1,RPS27A,SDHB,SDHC,MYBBP1A,OGDHL,UQCRQ,GAA,BLOC1S1,NDUFA12,SURF1,UQCR11,GPD1,PARK7,UBC,UQCRC1,NDUFA11
GO: Biological Process	GO:0006163	purine nucleotide metabolic process		4.386E-10	3.690E-6	7.095E-8	6.822E-7	101	555	ACACB,ADCY3,ADCY5,ADCYAP1R1,ADORA2A,ADRA2A,ADSL,MIF,AK1,ALDOA,MPP2,AMPD2,ADCY4,APLP1,APOE,GADD45GIP1,UQCC3,NUDT1,FLCN,ATP5F1D,ATP5F1E,ATP5MC2,ATP5MC3,ATP5ME,ATP6V1B2,ATP5PO,BAD,NDUFA1,NDUFA2,NDUFA3,NDUFA6,NDUFA8,NDUFB2,NDUFB6,NDUFB7,NDUFB8,NDUFB10,NDUFV1,NDUFS6,NDUFS8,NDUFV3,IER3,NME2,NOS1,NOS3,NT5E,CBS,PALM,PDE1B,PFAS,PFKL,UQCR10,NDUFB11,DDIT4,COX5B,CRH,MAPK7,NDUFS7,DLG4,PANK4,NME6,ENO1,ENO2,NUD…
GO: Molecular Function	GO:0008137	NADH dehydrogenase (ubiquinone) activity		3.443E-6	7.882E-3	7.165E-4	5.957E-3	16	46	NDUFA1,NDUFA2,NDUFA3,NDUFA6,NDUFA8,NDUFB2,NDUFB6,NDUFB7,NDUFB8,NDUFB10,NDUFV1,NDUFS6,NDUFS8,NDUFV3,NDUFS7,NDUFA12
GO: Molecular Function	GO:0050136	NADH dehydrogenase (quinone) activity		3.443E-6	7.882E-3	7.165E-4	5.957E-3	16	46	NDUFA1,NDUFA2,NDUFA3,NDUFA6,NDUFA8,NDUFB2,NDUFB6,NDUFB7,NDUFB8,NDUFB10,NDUFV1,NDUFS6,NDUFS8,NDUFV3,NDUFS7,NDUFA12
GO: Molecular Function	GO:0003954	NADH dehydrogenase activity		3.443E-6	7.882E-3	7.165E-4	5.957E-3	16	46	NDUFA1,NDUFA2,NDUFA3,NDUFA6,NDUFA8,NDUFB2,NDUFB6,NDUFB7,NDUFB8,NDUFB10,NDUFV1,NDUFS6,NDUFS8,NDUFV3,NDUFS7,NDUFA12
GO: Biological Process	GO:0019058	viral life cycle		2.849E-12	2.396E-8	7.261E-10	6.982E-9	92	447	GRK2,VPS18,APOE,EIF3B,EIF3F,VAMP8,HYAL2,AXL,RPL10A,NOTCH1,FURIN,CD81,PCBP1,CHMP1A,RPL36,POLR2E,POLR2I,POLR2K,POLR2L,THOC6,CTBP1,PTBP1,NECTIN1,RAN,CHMP6,VPS37B,EFNB3,TRIM28,RPL3,RPL6,RPL7A,RPL8,RPL11,RPL15,RPL18,RPL27,RPL27A,RPL28,RPL31,RPL35A,RPL37,RPL37A,RPL39,RPL41,RPLP0,RPLP1,RPLP2,RPS2,RPS3,RPS4X,RPS5,RPS8,RPS9,RPS10,RPS12,RPS15,RPS15A,RPS16,RPS20,RPS21,RPS23,RPS26,RPS27A,RPS28,RPS29,FAU,IFIT…
GO: Cellular Component	GO:0015934	large ribosomal subunit		1.574E-9	1.616E-6	7.346E-8	5.518E-7	32	105	MRPL15,RPL10A,SNU13,RPL36,MRTO4,RPL3,RPL6,RPL7A,RPL8,RPL11,RPL15,RPL18,RPL27,RPL27A,RPL28,RPL31,RPL35A,RPL36AL,RPL37,RPL37A,RPL39,RPL41,RPLP0,RPLP1,RPLP2,MRPL12,RPS12,MRPL27,MRPL28,NHP2,MRPL17,MRPL52
GO: Biological Process	GO:0045653	negative regulation of megakaryocyte differentiation		1.443E-4	1.000E0	7.447E-3	7.160E-2	8	18	HIST1H4I,HIST1H4A,HIST1H4D,HIST1H4F,HIST1H4C,HIST1H4H,CIB1,PRMT1
GO: Biological Process	GO:1901659	glycosyl compound biosynthetic process		9.778E-6	8.226E-2	7.546E-4	7.256E-3	30	133	ACACB,ADSL,AK1,ALDOA,UQCC3,FLCN,ATP5F1D,ATP5F1E,ATP5MC2,ATP5MC3,ATP5ME,ATP5PO,NME2,CAD,NT5E,UCK1,UCKL1,PANK4,NME6,TCIRG1,ATP5MG,COASY,STAT3,SURF1,GUK1,UMPS,IMPDH1,IMPDH2,ADSSL1,QTRT1
GO: Cellular Component	GO:0042824	MHC class I peptide loading complex		3.845E-4	3.949E-1	7.594E-3	5.705E-2	4	5	CALR,TAP1,TAP2,TAPBP
GO: Biological Process	GO:0042773	ATP synthesis coupled electron transport		7.383E-8	6.210E-4	7.763E-6	7.464E-5	26	85	UQCC3,NDUFA1,NDUFA2,NDUFA3,NDUFA6,NDUFA8,NDUFB2,NDUFB6,NDUFB7,NDUFB8,NDUFB10,NDUFV1,NDUFS6,NDUFS8,NDUFV3,UQCR10,NDUFB11,COX5B,NDUFS7,SDHC,UQCRQ,NDUFA12,UQCR11,PARK7,UQCRC1,NDUFA11
GO: Cellular Component	GO:0031410	cytoplasmic vesicle		4.058E-4	4.168E-1	7.864E-3	5.908E-2	166	1355	ABCA2,AP2A1,AP2A2,DISP3,ULK1,ALDOA,MMP14,VPS18,MCFD2,ANXA2,CNIH2,BMF,DBNL,APOE,ARF6,ARHGDIG,MT3,NUDT1,VAMP8,HYAL2,ATP6V1B2,FGFRL1,BSG,SQSTM1,AP1M1,NOS1,NOS3,FMNL1,NOTCH1,NOTCH4,NRGN,HAP1,CALR,CAMK2B,NTS,HIP1R,PEBP1,FURIN,HGS,PALM,RAB11B,CBARP,TAOK2,AP1S1,AP2S1,CAMKV,ZFYVE21,SNX15,CNP,YIPF3,UBQLN2,ATP6V1G1,SLC32A1,CARTPT,SEC24C,CALY,TMED9,CYB561,CYBA,SYT12,SNX17,DBI,RUSC2,SEMA4C,PTPRN,SV2A,DLG4,RA…
GO: Biological Process	GO:2001242	regulation of intrinsic apoptotic signaling pathway		1.540E-4	1.000E0	7.898E-3	7.594E-2	31	160	MIF,AKT1,BMF,FLCN,CCAR2,BAD,BAX,CDKN2D,SLC9A3R1,MAPK8IP1,PLEKHF1,ZNF385A,MAPK7,TMEM161A,RAD9A,FIS1,RPS3,RACK1,HYOU1,PIAS4,TRIM32,SYVN1,SOD1,ERP29,GRINA,TMBIM6,TPT1,PARK7,HSPA1A,HSPB1,WFS1
Human Phenotype	HP:0001290	Generalized hypotonia		3.928E-6	2.025E-2	1.072E-2	9.783E-2	111	808	ACADS,ACADVL,ACY1,ADSL,ALAD,DOCK6,LTBP4,APOE,UQCC3,DCHS1,ATP1A3,ATP5F1E,ATP6V1B2,BCKDHA,NDUFA1,NDUFA2,NDUFB10,NDUFV1,NDUFS6,NDUFS8,SYNGAP1,EIF2B4,EIF2B2,NOTCH1,CAD,SERPINH1,NANS,CHMP1A,PEX10,CHAT,AP1S1,PIK3R2,PEX16,TXN2,GMPPB,PLOD1,CNP,COL1A2,NDUFB11,COL6A2,DLL4,MPDU1,NDUFAF3,CTNNB1,MAP2K2,NDUFS7,PSAP,PET100,DDOST,CANT1,PEX5,TMEM231,DMPK,DPAGT1,SLC12A6,SCO2,RET,RFC2,KIF7,ELN,CWF19L1,WDR81,RPS23,S…
Human Phenotype	HP:0000184	Prominent lips		4.628E-6	2.385E-2	1.072E-2	9.783E-2	26	109	APOE,ATP6V1B2,SYNGAP1,AIP,NANS,PSMB8,GPR101,PHGDH,RET,RFC2,ECM1,ELN,RPL11,RPL15,RPL35A,RPS10,RPS26,RPS28,RPS29,SMARCB1,FUCA1,HRAS,CLIP2,TOE1,LIMK1,LTBP3
Human Phenotype	HP:0001252	Muscular hypotonia		6.241E-6	3.216E-2	1.072E-2	9.783E-2	157	1254	ACADS,ACADVL,ACY1,ADCY5,ADSL,ALAD,DOCK6,LTBP4,AMPD2,APOE,UQCC3,DCHS1,ATP1A3,ATP5F1E,ATP6V1B2,BCKDHA,NDUFA1,NDUFA2,NDUFB10,NDUFV1,NDUFS6,NDUFS8,SYNGAP1,EIF2B4,EIF2B2,NOTCH1,CAD,SERPINH1,NANS,AP4M1,CHMP1A,GLYCTK,PEX10,CHAT,SLC25A3,AP1S1,PIK3R2,PEX16,PYCR2,TMCO1,TXN2,GMPPB,PLOD1,CNP,COL1A2,NDUFB11,COL6A2,COMT,DLL4,MPDU1,NDUFAF3,SH2B1,NSMF,SEC24C,CTNNB1,MAP2K2,NDUFS7,PSAP,PET100,DDOST,CANT1,PEX5,TMEM…
Human Phenotype	HP:0000179	Thick lower lip vermilion		1.160E-5	5.980E-2	1.297E-2	1.184E-1	24	101	APOE,ATP6V1B2,AIP,NANS,PSMB8,GPR101,PHGDH,RET,RFC2,ECM1,ELN,RPL11,RPL15,RPL35A,RPS10,RPS26,RPS28,RPS29,SMARCB1,FUCA1,HRAS,CLIP2,LIMK1,LTBP3
Human Phenotype	HP:0004481	Progressive macrocephaly		1.547E-5	7.971E-2	1.297E-2	1.184E-1	17	59	AKT1,NDUFA1,NDUFB10,NDUFV1,NDUFS6,NDUFS8,PIK3R2,NDUFB11,NDUFAF3,CTNNB1,NDUFS7,FGFR1,SDHB,SDHC,SMO,GFAP,NDUFA11
Human Phenotype	HP:0005557	Abnormality of the zygomatic arch		2.070E-5	1.067E-1	1.297E-2	1.184E-1	45	259	LTBP4,APOE,DCHS1,BCR,BANF1,NOTCH2,SERPINH1,PEX10,PEX16,PYCR2,CNP,COL1A2,COL9A2,COMT,POLR1C,POR,SH2B1,SEC24C,MAP2K2,PTH1R,CANT1,NECTIN1,PEX5,DVL1,RFC2,KIF7,ELN,SF3B4,RPS26,FGFR1,SIX3,PIGV,PEX26,FZD2,GP1BB,OBSL1,HBA2,HBB,FKBP10,HSPG2,CLIP2,SHANK3,FAM20C,LIMK1,LMNA
Human Phenotype	HP:0012369	Abnormality of malar bones		2.070E-5	1.067E-1	1.297E-2	1.184E-1	45	259	LTBP4,APOE,DCHS1,BCR,BANF1,NOTCH2,SERPINH1,PEX10,PEX16,PYCR2,CNP,COL1A2,COL9A2,COMT,POLR1C,POR,SH2B1,SEC24C,MAP2K2,PTH1R,CANT1,NECTIN1,PEX5,DVL1,RFC2,KIF7,ELN,SF3B4,RPS26,FGFR1,SIX3,PIGV,PEX26,FZD2,GP1BB,OBSL1,HBA2,HBB,FKBP10,HSPG2,CLIP2,SHANK3,FAM20C,LIMK1,LMNA
Human Phenotype	HP:0010668	Abnormality of the zygomatic bone		2.070E-5	1.067E-1	1.297E-2	1.184E-1	45	259	LTBP4,APOE,DCHS1,BCR,BANF1,NOTCH2,SERPINH1,PEX10,PEX16,PYCR2,CNP,COL1A2,COL9A2,COMT,POLR1C,POR,SH2B1,SEC24C,MAP2K2,PTH1R,CANT1,NECTIN1,PEX5,DVL1,RFC2,KIF7,ELN,SF3B4,RPS26,FGFR1,SIX3,PIGV,PEX26,FZD2,GP1BB,OBSL1,HBA2,HBB,FKBP10,HSPG2,CLIP2,SHANK3,FAM20C,LIMK1,LMNA
Human Phenotype	HP:0000272	Malar flattening		2.266E-5	1.168E-1	1.297E-2	1.184E-1	44	252	LTBP4,APOE,DCHS1,BCR,BANF1,NOTCH2,SERPINH1,PEX10,PEX16,PYCR2,CNP,COL1A2,COL9A2,COMT,POLR1C,POR,SH2B1,SEC24C,MAP2K2,PTH1R,CANT1,NECTIN1,PEX5,DVL1,RFC2,KIF7,ELN,SF3B4,RPS26,FGFR1,SIX3,PIGV,PEX26,FZD2,GP1BB,OBSL1,HBA2,FKBP10,HSPG2,CLIP2,SHANK3,FAM20C,LIMK1,LMNA
Human Phenotype	HP:0000282	Facial edema		2.559E-5	1.319E-1	1.319E-2	1.203E-1	14	44	LTBP4,AIP,PIEZO1,GPR101,PEX5,RFC2,ELN,EPHB4,FOXG1,TNFRSF1A,IGSF3,CLIP2,SHANK3,LIMK1
Human Phenotype	HP:0012471	Thick vermilion border		3.874E-5	1.997E-1	1.664E-2	1.519E-1	32	165	APOE,ATP6V1B2,SYNGAP1,AIP,NANS,FIBP,PYCR2,PSMB8,GPR101,PHGDH,RET,RFC2,ECM1,ELN,RPL11,RPL15,RPL35A,RPS10,RPS26,RPS28,RPS29,FOXG1,SMARCB1,FUCA1,OBSL1,SLC35A2,HRAS,CLIP2,IDUA,TOE1,LIMK1,LTBP3
Human Phenotype	HP:0100539	Periorbital edema		3.875E-5	1.997E-1	1.664E-2	1.519E-1	13	40	LTBP4,AIP,PIEZO1,GPR101,PEX5,RFC2,ELN,FOXG1,TNFRSF1A,IGSF3,CLIP2,SHANK3,LIMK1
Human Phenotype	HP:0040290	Abnormality of skeletal muscles		4.340E-5	2.237E-1	1.721E-2	1.570E-1	87	628	MDH2,ADSL,AKT1,LTBP4,AMPD2,APOE,ATP6V1B2,CCND1,NDUFA1,NDUFB10,NDUFV1,NDUFS6,NDUFS8,SQSTM1,AIP,CCNF,FIBP,PEX10,PIK3R2,PLEC,PYCR2,GMPPB,NDUFB11,COL6A2,UBQLN2,NDUFAF3,CAVIN1,NDUFS7,PET100,PSMB8,GPR101,DCTN1,PHGDH,PEX5,MAFB,DMPK,HSPB8,SLC12A6,SCO2,DVL1,RFC2,SLC25A22,MYH14,ARMC5,BSCL2,ELN,WDR81,RYR1,FOXG1,SDHB,SDHC,PEX26,LIMS2,TRIM32,SMARCB1,SMARCD3,FUCA1,COASY,GAA,SOD1,KIF1C,SLC46A1,GJB1,SURF1,GNAI2,…
Human Phenotype	HP:0011799	Abnormality of facial soft tissue		7.367E-5	3.797E-1	2.712E-2	2.475E-1	55	355	ACADS,ADCY5,MEN1,AKT1,LTBP4,AMPD2,ATP1A3,SQSTM1,AIP,PEX10,CHAT,PEX16,GMPPB,COL6A2,DLL4,PIEZO1,CC2D1A,GPR101,DCTN1,PEX5,MAFB,DMPK,SLC12A6,RET,RFC2,BSCL2,ELN,EPHB4,TCIRG1,RYR1,FANCE,FANCF,FOXG1,SDHB,SDHC,PEX26,TRIM32,FTL,SOD1,GCSH,GFAP,XYLT2,LMNB2,TNFRSF1A,HRAS,IGSF3,CLIP2,TWNK,SHANK3,ADSSL1,GJC2,LIMK1,LMNA,LRP1,LRP5
Human Phenotype	HP:0030236	Abnormality of muscle size		8.898E-5	4.586E-1	2.763E-2	2.521E-1	87	640	MDH2,ADSL,AKT1,LTBP4,AMPD2,APOE,ATP6V1B2,CCND1,NDUFA1,NDUFB10,NDUFV1,NDUFS6,NDUFS8,SQSTM1,AIP,CCNF,FIBP,PEX10,PIK3R2,PLEC,PYCR2,GMPPB,NDUFB11,COL6A2,UBQLN2,NDUFAF3,CAVIN1,NDUFS7,PET100,PSMB8,GPR101,DCTN1,PHGDH,PEX5,MAFB,DMPK,HSPB8,SLC12A6,SCO2,DVL1,RFC2,SLC25A22,MYH14,ARMC5,BSCL2,ELN,WDR81,RYR1,FOXG1,SDHB,SDHC,PEX26,LIMS2,TRIM32,SMARCB1,SMARCD3,FUCA1,COASY,GAA,SOD1,KIF1C,SLC46A1,GJB1,SURF1,GNAI2,…
Human Phenotype	HP:0000627	Posterior embryotoxon		9.070E-5	4.675E-1	2.763E-2	2.521E-1	13	43	NOTCH2,PEX10,PEX16,NDUFB11,COMT,SEC24C,PEX5,RFC2,ELN,PEX26,GP1BB,CLIP2,LIMK1
Human Phenotype	HP:0008291	Pituitary corticotropic cell adenoma		9.650E-5	4.974E-1	2.763E-2	2.521E-1	6	10	MEN1,AIP,GPR101,RET,CDH23,GNAI2
Human Phenotype	HP:0011761	Pituitary null cell adenoma		9.650E-5	4.974E-1	2.763E-2	2.521E-1	6	10	MEN1,AIP,GPR101,RET,CDH23,GNAI2
Human Phenotype	HP:0000158	Macroglossia		1.132E-4	5.835E-1	3.041E-2	2.775E-1	28	144	AKT1,AMPD2,APOE,ATP6V1B2,CCND1,AIP,FIBP,PEX10,PSMB8,GPR101,DVL1,RFC2,ELN,FOXG1,SDHB,SDHC,PEX26,LIMS2,SMARCB1,SMARCD3,FUCA1,GAA,THRA,HBA2,HRAS,CLIP2,IDUA,LIMK1
Human Phenotype	HP:0008048	Abnormality of the line of Schwalbe		1.180E-4	6.082E-1	3.041E-2	2.775E-1	13	44	NOTCH2,PEX10,PEX16,NDUFB11,COMT,SEC24C,PEX5,RFC2,ELN,PEX26,GP1BB,CLIP2,LIMK1
Human Phenotype	HP:0100658	Cellulitis		1.261E-4	6.498E-1	3.051E-2	2.784E-1	10	28	PIK3CD,CYBA,PIEZO1,STAT3,TCF3,LRRC8A,TNFRSF1A,SHANK3,GJC2,LMNA
Human Phenotype	HP:0011400	Abnormal CNS myelination		1.302E-4	6.713E-1	3.051E-2	2.784E-1	38	222	ACY1,SLC12A5,ADSL,NDUFA1,NDUFA2,NDUFB10,NDUFV1,NDUFS6,NDUFS8,EIF2B4,EIF2B2,PDYN,PEX10,ADGRG1,PEX16,PYCR2,TXN2,NDUFB11,NDUFAF3,POLR1C,NDUFS7,PSAP,PET100,DDOST,PHGDH,PEX5,GLRX5,RNASEH2A,PEX26,FUCA1,GAA,GFAP,NDUFA12,SURF1,IDUA,SHANK3,NDUFA11,GJC2
Human Phenotype	HP:0005562	Multiple renal cysts		1.561E-4	8.043E-1	3.497E-2	3.191E-1	14	51	CCND1,NOTCH2,AP2S1,COMT,SEC24C,PRKCSH,RFC2,ELN,APC2,STK11,GP1BB,CLIP2,LIMK1,LRP5
Human Phenotype	HP:0004586	Biconcave vertebral bodies		1.766E-4	9.105E-1	3.770E-2	3.440E-1	10	29	NOTCH2,AIP,SERPINH1,CBS,NANS,COL1A2,SPARC,GNAI2,FKBP10,IDUA
Human Phenotype	HP:0000157	Abnormality of the tongue		1.853E-4	9.552E-1	3.770E-2	3.440E-1	53	350	AKT1,AMPD2,APOE,ATP6V1B2,CCND1,BCR,SQSTM1,AIP,CCNF,FIBP,PEX10,PEX16,ECEL1,UBQLN2,POLR1C,MAP2K2,PSMB8,GPR101,PTH1R,PEX5,TMEM231,DVL1,RFC2,ECM1,KIF7,ELN,EVC,FOXG1,SDHB,SDHC,TMEM107,NHP2,PEX26,LIMS2,SMARCB1,SMARCD3,FUCA1,GAA,SOD1,SLC46A1,LMNB2,B9D2,THRA,HBA2,HRAS,CLIP2,IDUA,SHANK3,IGHMBP2,FAM20C,WDR34,LAMB3,LIMK1
Human Phenotype	HP:0006767	Pituitary prolactin cell adenoma		1.956E-4	1.000E0	3.770E-2	3.440E-1	6	11	MEN1,AIP,GPR101,RET,CDH23,GNAI2
Human Phenotype	HP:0003712	Skeletal muscle hypertrophy		2.021E-4	1.000E0	3.770E-2	3.440E-1	33	187	AKT1,LTBP4,AMPD2,APOE,ATP6V1B2,CCND1,AIP,FIBP,PEX10,CAVIN1,PSMB8,GPR101,DVL1,RFC2,BSCL2,ELN,FOXG1,SDHB,SDHC,PEX26,LIMS2,SMARCB1,SMARCD3,FUCA1,GAA,THRA,HBA2,HRAS,HSPG2,CLIP2,IDUA,LIMK1,LMNA
Human Phenotype	HP:0003312	Abnormal form of the vertebral bodies		2.048E-4	1.000E0	3.770E-2	3.440E-1	41	251	AKT1,NOTCH2,AIP,SERPINH1,CBS,NANS,TMCO1,CNP,COL1A2,COL9A2,POR,SH2B1,PTH1R,CANT1,MAFB,DVL1,PAM16,RFC2,ELN,SF3B4,TCIRG1,CDIPT,FGFR1,PUF60,SGSH,FUZ,FUCA1,SPARC,XYLT2,GNAI2,OBSL1,FKBP10,HSPG2,CLIP2,WNT7A,IDUA,LFNG,LIMK1,LMNA,LRP5,LTBP3
Human Phenotype	HP:0030809	Abnormal tongue morphology		2.240E-4	1.000E0	3.919E-2	3.576E-1	45	285	AKT1,AMPD2,APOE,ATP6V1B2,CCND1,BCR,AIP,FIBP,PEX10,PEX16,ECEL1,POLR1C,PSMB8,GPR101,PTH1R,TMEM231,DVL1,RFC2,ECM1,KIF7,ELN,EVC,FOXG1,SDHB,SDHC,TMEM107,NHP2,PEX26,LIMS2,SMARCB1,SMARCD3,FUCA1,GAA,SLC46A1,LMNB2,B9D2,THRA,HBA2,HRAS,CLIP2,IDUA,FAM20C,WDR34,LAMB3,LIMK1
Human Phenotype	HP:0001155	Abnormality of the hand		2.281E-4	1.000E0	3.919E-2	3.576E-1	132	1086	MARS,MEN1,AKT1,DOCK6,APOE,DCHS1,ATP6V1B2,BCR,BANF1,SQSTM1,NOTCH1,NOTCH2,AIP,CBS,DPP9,NANS,FIBP,AP4M1,PEX10,PIK3R2,PEX16,PSMC3IP,ECEL1,PLEC,PYCR2,TMCO1,PLOD1,CNP,COL6A2,COL9A2,COMT,DLL4,POR,SH2B1,SEC24C,MAP2K2,EIF4A3,PSMB8,GPR101,DCTN1,PTH1R,PHGDH,CANT1,NECTIN1,PEX5,MAFB,DLX6,TMEM231,DPAGT1,SLC12A6,DVL1,RET,RFC2,KIF7,BSCL2,ELN,RPL11,RPL15,EPHB4,RPL35A,SF3B4,APC2,RPS10,WDR81,EVC,RPS23,RPS26,RPS28,R…
Human Phenotype	HP:0012450	Chronic constipation		2.579E-4	1.000E0	4.288E-2	3.913E-1	9	25	CCND1,SH2B1,RFC2,ELN,SMARCD3,SMO,MLYCD,CLIP2,LIMK1
Human Phenotype	HP:0001760	Abnormality of the foot		2.753E-4	1.000E0	4.325E-2	3.946E-1	129	1061	MARS,MEN1,AKT1,MMP14,DOCK6,LTBP4,APOE,DCHS1,ATP1A3,ATP6V1B2,BCR,SYNGAP1,SQSTM1,NOTCH1,NOTCH2,AIP,CBS,FIBP,AP4M1,CHMP1A,PEX10,PIK3R2,PSMC3IP,ECEL1,PLEC,PYCR2,TMCO1,PLOD1,CNP,COL1A2,COL6A2,COMT,DLL4,POR,SH2B1,NSMF,SEC24C,MAP2K2,EIF4A3,PSMB8,GPR101,PTH1R,PHGDH,CANT1,NECTIN1,PEX5,MAFB,TMEM231,DMPK,HSPB8,SLC12A6,TAPBPL,DVL1,RET,RFC2,KIF7,MYH14,BSCL2,ELN,SF3B4,WDR81,EVC,RTN2,RYR1,FANCE,FANCF,FBLN1,SBF1…
Human Phenotype	HP:0100740	Embryotoxon		2.853E-4	1.000E0	4.325E-2	3.946E-1	15	60	APOE,NOTCH2,PEX10,PEX16,NDUFB11,COMT,SEC24C,PEX5,RFC2,ELN,PEX26,GP1BB,CLIP2,LCAT,LIMK1
Human Phenotype	HP:0002463	Language impairment		2.853E-4	1.000E0	4.325E-2	3.946E-1	15	60	APOE,BCR,SYNGAP1,SQSTM1,ADGRG1,CNP,SH2B1,RFC2,ELN,FTL,ZCCHC24,GJB1,GRN,CLIP2,LIMK1
Human Phenotype	HP:0005105	Abnormal nasal morphology		2.967E-4	1.000E0	4.336E-2	3.957E-1	101	793	ADSL,AKT1,DOCK6,APOE,ATP6V1B2,BCR,BANF1,SYNGAP1,NOTCH1,NOTCH2,AIP,NANS,AP4M1,PEX10,PIK3R2,PEX16,ECEL1,PLEC,PYCR2,TMCO1,CNP,COL1A2,NDUFB11,COMT,POLD1,POR,THOC6,SEC24C,MAP2K2,EIF4A3,PSMB8,GPR101,PTH1R,PHGDH,PTPRF,CANT1,PEX5,MAFB,TMEM231,SLC12A6,DVL1,PAM16,RET,RFC2,KIF7,RLBP1,IER3IP1,ROM1,ELN,RPL11,RPL15,EPHB4,RPL35A,SF3B4,APC2,RPS10,RPS26,RPS28,RPS29,RYR1,CITED2,FANCE,FANCF,EMG1,FGFR1,FOXG1,RNASEH2…
Human Phenotype	HP:0010624	Aplastic/hypoplastic toenail		3.029E-4	1.000E0	4.336E-2	3.957E-1	18	80	DOCK6,BCR,NOTCH1,DLL4,RFC2,KIF7,ELN,EVC,FGFR1,NHP2,SMARCB1,HRAS,CLIP2,WNT7A,SHANK3,ITGB4,LAMB3,LIMK1
Human Phenotype	HP:0002692	Hypoplastic facial bones		3.218E-4	1.000E0	4.482E-2	4.090E-1	58	401	AKT1,LTBP4,APOE,DCHS1,BCR,BANF1,NOTCH1,NOTCH2,SERPINH1,PEX10,PEX16,PYCR2,TMCO1,CNP,COL1A2,COL9A2,COMT,POLR1C,POR,SH2B1,NSMF,SEC24C,MAP2K2,PTH1R,CANT1,NECTIN1,PEX5,MAFB,SLC12A6,DVL1,RFC2,KIF7,ELN,EPHB4,SF3B4,EVC,RPS26,CITED2,FANCE,FANCF,FGFR1,SIX3,PIGV,NHP2,PEX26,FZD2,GP1BB,OBSL1,HBA2,FKBP10,HSPG2,CLIP2,SHANK3,FAM20C,LIMK1,LMNA,SPRY4,LTBP3
Human Phenotype	HP:0008388	Abnormal toenail morphology		3.431E-4	1.000E0	4.583E-2	4.182E-1	23	116	DOCK6,BCR,NOTCH1,AIP,DLL4,GPR101,NECTIN1,RFC2,KIF7,ELN,EVC,FGFR1,NHP2,SMARCB1,IL17RC,HRAS,UMPS,CLIP2,WNT7A,SHANK3,ITGB4,LAMB3,LIMK1
Human Phenotype	HP:0040278	Prolactinoma		3.468E-4	1.000E0	4.583E-2	4.182E-1	4	5	MEN1,AIP,RET,CDH23
Human Phenotype	HP:0000366	Abnormality of the nose		3.570E-4	1.000E0	4.600E-2	4.197E-1	155	1325	ACY1,ADSL,AKT1,DOCK6,LTBP4,RSPH9,MCFD2,APOE,DCHS1,ATP6V1B2,MYH9,CCND1,BCR,BANF1,SYNGAP1,NFKBIA,NOTCH1,NOTCH2,AIP,NANS,CD81,AP4M1,PEX10,PIK3CD,PIK3R2,PEX16,ECEL1,PLEC,PYCR2,TMCO1,PLOD1,CNP,COL1A2,NDUFB11,COMT,POLD1,POLR1C,POLR2K,POR,SH2B1,THOC6,NSMF,SEC24C,PRKCD,CTNNB1,MAP2K2,EIF4A3,PSMB8,GPR101,PTH1R,PHGDH,PTPN14,PTPRF,CANT1,NECTIN1,PEX5,MAFB,TMEM231,FERMT3,SLC12A6,SH2B3,DVL1,PAM16,RET,RFC2,ECM1,…
Mouse Phenotype	MP:0005167	abnormal blood-brain barrier function		7.109E-6	4.829E-2	4.829E-2	4.540E-1	13	31	APOE,NOS1,NOS3,ADGRA2,CTNNB1,CCM2,RAMP2,GFAP,MFSD2A,HRH3,VWF,WNT7A,WNT7B
Pathway	1268681	Formation of a pool of free 40S subunits	BioSystems: REACTOME	5.599E-20	1.566E-16	1.566E-16	1.333E-15	47	107	EIF3B,EIF3F,EIF3I,RPL10A,RPL36,RPL3,RPL6,RPL7A,RPL8,RPL11,RPL15,RPL18,RPL27,RPL27A,RPL28,RPL31,RPL35A,RPL36AL,RPL37,RPL37A,RPL39,RPL41,RPLP0,RPLP1,RPLP2,RPS2,RPS3,RPS4X,RPS5,RPS8,RPS9,RPS10,RPS12,RPS15,RPS15A,RPS16,RPS20,RPS21,RPS23,RPS26,RPS27A,RPS28,RPS29,FAU,EIF3L,EIF3K,RPSA
Pathway	1268691	Peptide chain elongation	BioSystems: REACTOME	1.923E-19	5.378E-16	2.689E-16	2.289E-15	43	93	RPL10A,RPL36,EEF2,RPL3,RPL6,RPL7A,RPL8,RPL11,RPL15,RPL18,RPL27,RPL27A,RPL28,RPL31,RPL35A,RPL36AL,RPL37,RPL37A,RPL39,RPL41,RPLP0,RPLP1,RPLP2,RPS2,RPS3,RPS4X,RPS5,RPS8,RPS9,RPS10,RPS12,RPS15,RPS15A,RPS16,RPS20,RPS21,RPS23,RPS26,RPS27A,RPS28,RPS29,FAU,RPSA
Pathway	1268690	Eukaryotic Translation Elongation	BioSystems: REACTOME	3.048E-19	8.524E-16	2.841E-16	2.419E-15	44	98	RPL10A,RPL36,EEF1B2,EEF2,RPL3,RPL6,RPL7A,RPL8,RPL11,RPL15,RPL18,RPL27,RPL27A,RPL28,RPL31,RPL35A,RPL36AL,RPL37,RPL37A,RPL39,RPL41,RPLP0,RPLP1,RPLP2,RPS2,RPS3,RPS4X,RPS5,RPS8,RPS9,RPS10,RPS12,RPS15,RPS15A,RPS16,RPS20,RPS21,RPS23,RPS26,RPS27A,RPS28,RPS29,FAU,RPSA
Pathway	1268680	Cap-dependent Translation Initiation	BioSystems: REACTOME	1.111E-18	3.107E-15	4.700E-16	4.001E-15	50	127	EIF3B,EIF3F,EIF3I,RPL10A,EIF2B4,EIF2B2,RPL36,RPL3,RPL6,RPL7A,RPL8,RPL11,RPL15,RPL18,RPL27,RPL27A,RPL28,RPL31,RPL35A,RPL36AL,RPL37,RPL37A,RPL39,RPL41,RPLP0,RPLP1,RPLP2,RPS2,RPS3,RPS4X,RPS5,RPS8,RPS9,RPS10,RPS12,RPS15,RPS15A,RPS16,RPS20,RPS21,RPS23,RPS26,RPS27A,RPS28,RPS29,FAU,EIF3L,EIF3K,EIF4H,RPSA
Pathway	1268679	Eukaryotic Translation Initiation	BioSystems: REACTOME	1.111E-18	3.107E-15	4.700E-16	4.001E-15	50	127	EIF3B,EIF3F,EIF3I,RPL10A,EIF2B4,EIF2B2,RPL36,RPL3,RPL6,RPL7A,RPL8,RPL11,RPL15,RPL18,RPL27,RPL27A,RPL28,RPL31,RPL35A,RPL36AL,RPL37,RPL37A,RPL39,RPL41,RPLP0,RPLP1,RPLP2,RPS2,RPS3,RPS4X,RPS5,RPS8,RPS9,RPS10,RPS12,RPS15,RPS15A,RPS16,RPS20,RPS21,RPS23,RPS26,RPS27A,RPS28,RPS29,FAU,EIF3L,EIF3K,EIF4H,RPSA
Pathway	1268692	Eukaryotic Translation Termination	BioSystems: REACTOME	1.417E-18	3.963E-15	4.700E-16	4.001E-15	43	97	APEH,RPL10A,RPL36,RPL3,RPL6,RPL7A,RPL8,RPL11,RPL15,RPL18,RPL27,RPL27A,RPL28,RPL31,RPL35A,RPL36AL,RPL37,RPL37A,RPL39,RPL41,RPLP0,RPLP1,RPLP2,RPS2,RPS3,RPS4X,RPS5,RPS8,RPS9,RPS10,RPS12,RPS15,RPS15A,RPS16,RPS20,RPS21,RPS23,RPS26,RPS27A,RPS28,RPS29,FAU,RPSA
Pathway	1269120	Viral mRNA Translation	BioSystems: REACTOME	1.519E-18	4.250E-15	4.700E-16	4.001E-15	42	93	RPL10A,RPL36,RPL3,RPL6,RPL7A,RPL8,RPL11,RPL15,RPL18,RPL27,RPL27A,RPL28,RPL31,RPL35A,RPL36AL,RPL37,RPL37A,RPL39,RPL41,RPLP0,RPLP1,RPLP2,RPS2,RPS3,RPS4X,RPS5,RPS8,RPS9,RPS10,RPS12,RPS15,RPS15A,RPS16,RPS20,RPS21,RPS23,RPS26,RPS27A,RPS28,RPS29,FAU,RPSA
Pathway	1383086	Major pathway of rRNA processing in the nucleolus and cytosol	BioSystems: REACTOME	1.573E-18	4.399E-15	4.700E-16	4.001E-15	61	181	WDR18,DHX37,NOB1,RPL10A,BYSL,SNU13,RRP9,NOC4L,EXOSC4,RPL36,DDX49,CSNK1D,IMP3,RPL3,RPL6,RPL7A,RPL8,RPL11,RPL15,RPL18,RPL27,RPL27A,RPL28,RPL31,RPL35A,RPL36AL,RPL37,RPL37A,RPL39,RPL41,RPLP0,RPLP1,RPLP2,FBL,RPS2,RPS3,RPS4X,RPS5,RPS8,RPS9,RPS10,RPS12,RPS15,RPS15A,RPS16,RPS20,RPS21,RPS23,RPS26,RPS27A,RPS28,RPS29,FAU,EMG1,TBL3,PDCD11,RRP7A,BOP1,NOL6,EXOSC5,RPSA
Pathway	1268686	GTP hydrolysis and joining of the 60S ribosomal subunit	BioSystems: REACTOME	1.680E-18	4.700E-15	4.700E-16	4.001E-15	48	119	EIF3B,EIF3F,EIF3I,RPL10A,RPL36,RPL3,RPL6,RPL7A,RPL8,RPL11,RPL15,RPL18,RPL27,RPL27A,RPL28,RPL31,RPL35A,RPL36AL,RPL37,RPL37A,RPL39,RPL41,RPLP0,RPLP1,RPLP2,RPS2,RPS3,RPS4X,RPS5,RPS8,RPS9,RPS10,RPS12,RPS15,RPS15A,RPS16,RPS20,RPS21,RPS23,RPS26,RPS27A,RPS28,RPS29,FAU,EIF3L,EIF3K,EIF4H,RPSA
Pathway	1268688	L13a-mediated translational silencing of Ceruloplasmin expression	BioSystems: REACTOME	1.680E-18	4.700E-15	4.700E-16	4.001E-15	48	119	EIF3B,EIF3F,EIF3I,RPL10A,RPL36,RPL3,RPL6,RPL7A,RPL8,RPL11,RPL15,RPL18,RPL27,RPL27A,RPL28,RPL31,RPL35A,RPL36AL,RPL37,RPL37A,RPL39,RPL41,RPLP0,RPLP1,RPLP2,RPS2,RPS3,RPS4X,RPS5,RPS8,RPS9,RPS10,RPS12,RPS15,RPS15A,RPS16,RPS20,RPS21,RPS23,RPS26,RPS27A,RPS28,RPS29,FAU,EIF3L,EIF3K,EIF4H,RPSA
Pathway	1383085	rRNA processing	BioSystems: REACTOME	2.362E-18	6.607E-15	6.006E-16	5.114E-15	65	203	WDR18,DHX37,NOB1,RPL10A,BYSL,SNU13,RRP9,NOC4L,TSR3,EXOSC4,MRM2,RPL36,DDX49,CSNK1D,IMP3,RPL3,RPL6,RPL7A,RPL8,RPL11,RPL15,RPL18,RPL27,RPL27A,RPL28,RPL31,RPL35A,RPL36AL,RPL37,RPL37A,RPL39,RPL41,RPLP0,RPLP1,RPLP2,FBL,RPS2,RPS3,RPS4X,RPS5,RPS8,RPS9,RPS10,RPS12,RPS15,RPS15A,RPS16,RPS20,RPS21,RPS23,RPS26,RPS27A,RPS28,RPS29,FAU,EMG1,NHP2,TBL3,PDCD11,RRP7A,BOP1,HSD17B10,NOL6,EXOSC5,RPSA
Pathway	1427846	rRNA processing in the nucleus and cytosol	BioSystems: REACTOME	2.673E-18	7.476E-15	6.230E-16	5.304E-15	63	193	WDR18,DHX37,NOB1,RPL10A,BYSL,SNU13,RRP9,NOC4L,TSR3,EXOSC4,RPL36,DDX49,CSNK1D,IMP3,RPL3,RPL6,RPL7A,RPL8,RPL11,RPL15,RPL18,RPL27,RPL27A,RPL28,RPL31,RPL35A,RPL36AL,RPL37,RPL37A,RPL39,RPL41,RPLP0,RPLP1,RPLP2,FBL,RPS2,RPS3,RPS4X,RPS5,RPS8,RPS9,RPS10,RPS12,RPS15,RPS15A,RPS16,RPS20,RPS21,RPS23,RPS26,RPS27A,RPS28,RPS29,FAU,EMG1,NHP2,TBL3,PDCD11,RRP7A,BOP1,NOL6,EXOSC5,RPSA
Pathway	1268678	Translation	BioSystems: REACTOME	5.769E-18	1.614E-14	1.162E-15	9.893E-15	57	165	APEH,EIF3B,EIF3F,EIF3I,RPL10A,EIF2B4,EIF2B2,SRPRB,RPL36,DDOST,EEF1B2,EEF2,RPL3,RPL6,RPL7A,RPL8,RPL11,RPL15,RPL18,RPL27,RPL27A,RPL28,RPL31,RPL35A,RPL36AL,RPL37,RPL37A,RPL39,RPL41,RPLP0,RPLP1,RPLP2,RPS2,RPS3,RPS4X,RPS5,RPS8,RPS9,RPS10,RPS12,RPS15,RPS15A,RPS16,RPS20,RPS21,RPS23,RPS26,RPS27A,RPS28,RPS29,FAU,EIF3L,SRP54,EIF3K,SEC61G,EIF4H,RPSA
Pathway	1269718	Nonsense Mediated Decay (NMD) independent of the Exon Junction Complex (EJC)	BioSystems: REACTOME	5.816E-18	1.627E-14	1.162E-15	9.893E-15	43	100	RPL10A,RPL36,UPF1,RPL3,RPL6,RPL7A,RPL8,RPL11,RPL15,RPL18,RPL27,RPL27A,RPL28,RPL31,RPL35A,RPL36AL,RPL37,RPL37A,RPL39,RPL41,RPLP0,RPLP1,RPLP2,RPS2,RPS3,RPS4X,RPS5,RPS8,RPS9,RPS10,RPS12,RPS15,RPS15A,RPS16,RPS20,RPS21,RPS23,RPS26,RPS27A,RPS28,RPS29,FAU,RPSA
Pathway	1339156	Selenocysteine synthesis	BioSystems: REACTOME	6.501E-18	1.818E-14	1.212E-15	1.032E-14	42	96	RPL10A,RPL36,RPL3,RPL6,RPL7A,RPL8,RPL11,RPL15,RPL18,RPL27,RPL27A,RPL28,RPL31,RPL35A,RPL36AL,RPL37,RPL37A,RPL39,RPL41,RPLP0,RPLP1,RPLP2,RPS2,RPS3,RPS4X,RPS5,RPS8,RPS9,RPS10,RPS12,RPS15,RPS15A,RPS16,RPS20,RPS21,RPS23,RPS26,RPS27A,RPS28,RPS29,FAU,RPSA
Pathway	1268689	SRP-dependent cotranslational protein targeting to membrane	BioSystems: REACTOME	1.947E-17	5.446E-14	3.364E-15	2.864E-14	46	116	RPL10A,SRPRB,RPL36,DDOST,RPL3,RPL6,RPL7A,RPL8,RPL11,RPL15,RPL18,RPL27,RPL27A,RPL28,RPL31,RPL35A,RPL36AL,RPL37,RPL37A,RPL39,RPL41,RPLP0,RPLP1,RPLP2,RPS2,RPS3,RPS4X,RPS5,RPS8,RPS9,RPS10,RPS12,RPS15,RPS15A,RPS16,RPS20,RPS21,RPS23,RPS26,RPS27A,RPS28,RPS29,FAU,SRP54,SEC61G,RPSA
Pathway	83036	Ribosome	BioSystems: KEGG	2.045E-17	5.719E-14	3.364E-15	2.864E-14	54	154	MRPL15,RPL10A,RPL36,MRPS16,MRPS18A,MRPL4,MRPS7,RPL3,RPL6,RPL7A,RPL8,RPL11,RPL15,RPL18,RPL27,RPL27A,RPL28,RPL31,RPL35A,RPL36AL,RPL37,RPL37A,RPL39,RPL41,RPLP0,RPLP1,RPLP2,MRPL12,MRPS12,RPS2,RPS3,RPS4X,RPS5,RPS8,RPS9,RPS10,RPS12,MRPL27,RPS15,RPS15A,RPS16,RPS20,RPS21,RPS23,RPS26,RPS27A,RPS28,RPS29,FAU,MRPL28,MRPL17,MRPL14,MRPL9,RPSA
Pathway	1339149	Selenoamino acid metabolism	BioSystems: REACTOME	1.591E-15	4.449E-12	2.472E-13	2.104E-12	45	123	MARS,RPL10A,CBS,RPL36,RPL3,RPL6,RPL7A,RPL8,RPL11,RPL15,RPL18,RPL27,RPL27A,RPL28,RPL31,RPL35A,RPL36AL,RPL37,RPL37A,RPL39,RPL41,RPLP0,RPLP1,RPLP2,RPS2,RPS3,RPS4X,RPS5,RPS8,RPS9,RPS10,RPS12,RPS15,RPS15A,RPS16,RPS20,RPS21,RPS23,RPS26,RPS27A,RPS28,RPS29,FAU,AIMP2,RPSA
Pathway	1269717	Nonsense Mediated Decay (NMD) enhanced by the Exon Junction Complex (EJC)	BioSystems: REACTOME	4.256E-15	1.190E-11	5.952E-13	5.067E-12	44	121	RPL10A,RPL36,EIF4A3,UPF1,RPL3,RPL6,RPL7A,RPL8,RPL11,RPL15,RPL18,RPL27,RPL27A,RPL28,RPL31,RPL35A,RPL36AL,RPL37,RPL37A,RPL39,RPL41,RPLP0,RPLP1,RPLP2,RPS2,RPS3,RPS4X,RPS5,RPS8,RPS9,RPS10,RPS12,RPS15,RPS15A,RPS16,RPS20,RPS21,RPS23,RPS26,RPS27A,RPS28,RPS29,FAU,RPSA
Pathway	1269716	Nonsense-Mediated Decay (NMD)	BioSystems: REACTOME	4.256E-15	1.190E-11	5.952E-13	5.067E-12	44	121	RPL10A,RPL36,EIF4A3,UPF1,RPL3,RPL6,RPL7A,RPL8,RPL11,RPL15,RPL18,RPL27,RPL27A,RPL28,RPL31,RPL35A,RPL36AL,RPL37,RPL37A,RPL39,RPL41,RPLP0,RPLP1,RPLP2,RPS2,RPS3,RPS4X,RPS5,RPS8,RPS9,RPS10,RPS12,RPS15,RPS15A,RPS16,RPS20,RPS21,RPS23,RPS26,RPS27A,RPS28,RPS29,FAU,RPSA
Pathway	1269109	Influenza Life Cycle	BioSystems: REACTOME	6.357E-15	1.778E-11	8.467E-13	7.209E-12	49	147	RPL10A,CALR,RPL36,POLR2E,POLR2I,POLR2K,POLR2L,RAN,RPL3,RPL6,RPL7A,RPL8,RPL11,RPL15,RPL18,RPL27,RPL27A,RPL28,RPL31,RPL35A,RPL36AL,RPL37,RPL37A,RPL39,RPL41,RPLP0,RPLP1,RPLP2,RPS2,RPS3,RPS4X,RPS5,RPS8,RPS9,RPS10,RPS12,RPS15,RPS15A,RPS16,RPS20,RPS21,RPS23,RPS26,RPS27A,RPS28,RPS29,FAU,HSPA1A,RPSA
Pathway	1269115	Influenza Viral RNA Transcription and Replication	BioSystems: REACTOME	4.318E-14	1.208E-10	5.489E-12	4.673E-11	46	138	RPL10A,RPL36,POLR2E,POLR2I,POLR2K,POLR2L,RPL3,RPL6,RPL7A,RPL8,RPL11,RPL15,RPL18,RPL27,RPL27A,RPL28,RPL31,RPL35A,RPL36AL,RPL37,RPL37A,RPL39,RPL41,RPLP0,RPLP1,RPLP2,RPS2,RPS3,RPS4X,RPS5,RPS8,RPS9,RPS10,RPS12,RPS15,RPS15A,RPS16,RPS20,RPS21,RPS23,RPS26,RPS27A,RPS28,RPS29,FAU,RPSA
Pathway	1269108	Influenza Infection	BioSystems: REACTOME	1.497E-13	4.186E-10	1.820E-11	1.550E-10	49	158	RPL10A,CALR,RPL36,POLR2E,POLR2I,POLR2K,POLR2L,RAN,RPL3,RPL6,RPL7A,RPL8,RPL11,RPL15,RPL18,RPL27,RPL27A,RPL28,RPL31,RPL35A,RPL36AL,RPL37,RPL37A,RPL39,RPL41,RPLP0,RPLP1,RPLP2,RPS2,RPS3,RPS4X,RPS5,RPS8,RPS9,RPS10,RPS12,RPS15,RPS15A,RPS16,RPS20,RPS21,RPS23,RPS26,RPS27A,RPS28,RPS29,FAU,HSPA1A,RPSA
Pathway	1268682	Formation of the ternary complex, and subsequently, the 43S complex	BioSystems: REACTOME	1.163E-11	3.253E-8	1.355E-9	1.154E-8	25	55	EIF3B,EIF3F,EIF3I,RPS2,RPS3,RPS4X,RPS5,RPS8,RPS9,RPS10,RPS12,RPS15,RPS15A,RPS16,RPS20,RPS21,RPS23,RPS26,RPS27A,RPS28,RPS29,FAU,EIF3L,EIF3K,RPSA
Pathway	1268685	Ribosomal scanning and start codon recognition	BioSystems: REACTOME	6.585E-11	1.842E-7	7.368E-9	6.273E-8	26	63	EIF3B,EIF3F,EIF3I,RPS2,RPS3,RPS4X,RPS5,RPS8,RPS9,RPS10,RPS12,RPS15,RPS15A,RPS16,RPS20,RPS21,RPS23,RPS26,RPS27A,RPS28,RPS29,FAU,EIF3L,EIF3K,EIF4H,RPSA
Pathway	1268684	Translation initiation complex formation	BioSystems: REACTOME	1.005E-10	2.811E-7	1.081E-8	9.206E-8	26	64	EIF3B,EIF3F,EIF3I,RPS2,RPS3,RPS4X,RPS5,RPS8,RPS9,RPS10,RPS12,RPS15,RPS15A,RPS16,RPS20,RPS21,RPS23,RPS26,RPS27A,RPS28,RPS29,FAU,EIF3L,EIF3K,EIF4H,RPSA
Pathway	1268683	Activation of the mRNA upon binding of the cap-binding complex and eIFs, and subsequent binding to 43S	BioSystems: REACTOME	1.518E-10	4.246E-7	1.573E-8	1.339E-7	26	65	EIF3B,EIF3F,EIF3I,RPS2,RPS3,RPS4X,RPS5,RPS8,RPS9,RPS10,RPS12,RPS15,RPS15A,RPS16,RPS20,RPS21,RPS23,RPS26,RPS27A,RPS28,RPS29,FAU,EIF3L,EIF3K,EIF4H,RPSA
Pathway	1269056	Infectious disease	BioSystems: REACTOME	2.771E-10	7.749E-7	2.768E-8	2.356E-7	80	393	AP2A1,AP2A2,SLC25A5,BANF1,RPL10A,AP1M1,CALR,FURIN,HGS,RCC1,AP1S1,AP2S1,RPL36,POLR2E,POLR2I,POLR2K,POLR2L,CTNNB1,MAP2K2,PSMA7,PSMB5,PSMB6,PSMB8,PSMB10,PSMC3,PSMD3,PSMD4,SV2A,RAN,RANGAP1,CHMP6,VPS37B,EEF2,RPL3,RPL6,RPL7A,RPL8,RPL11,RPL15,RPL18,RPL27,RPL27A,RPL28,RPL31,RPL35A,RPL36AL,RPL37,RPL37A,RPL39,RPL41,RPLP0,RPLP1,RPLP2,RPS2,RPS3,RPS4X,RPS5,RPS8,RPS9,RPS10,RPS12,RPS15,RPS15A,RPS16,RPS20,RPS21,…
Pathway	1270158	Metabolism of amino acids and derivatives	BioSystems: REACTOME	8.458E-10	2.366E-6	8.157E-8	6.945E-7	75	367	MARS,ASL,BCAT2,BCKDHA,RPL10A,OAZ1,CBS,KYAT1,CKB,GRHPR,PYCR2,SMOX,RPL36,CRYM,SLC25A10,PRODH,PSMA7,PSMB5,PSMB6,PSMB8,PSMB10,PSMC3,PSMD3,PSMD4,PHGDH,NQO1,QDPR,ASPG,RPL3,RPL6,RPL7A,RPL8,RPL11,RPL15,RPL18,RPL27,RPL27A,RPL28,RPL31,RPL35A,RPL36AL,RPL37,RPL37A,RPL39,RPL41,RPLP0,RPLP1,RPLP2,RPS2,RPS3,RPS4X,RPS5,RPS8,RPS9,RPS10,RPS12,RPS15,RPS15A,RPS16,RPS20,RPS21,RPS23,RPS26,RPS27A,RPS28,RPS29,FAU,GAMT,GC…
Pathway	83100	Huntington's disease	BioSystems: KEGG	1.422E-9	3.978E-6	1.326E-7	1.129E-6	48	193	AP2A1,AP2A2,SLC25A5,ATP5F1D,ATP5F1E,ATP5MC2,ATP5MC3,ATP5PO,BAX,NDUFA1,NDUFA2,NDUFA3,NDUFA6,NDUFA8,NDUFB2,NDUFB6,NDUFB7,NDUFB8,NDUFB10,NDUFV1,NDUFS6,NDUFS8,NDUFV3,HAP1,UQCR10,AP2S1,PLCB2,PLCB3,NDUFB11,COX5B,POLR2E,POLR2I,POLR2K,POLR2L,NDUFS7,DCTN1,DLG4,DNAL4,SDHB,SDHC,UQCRQ,SOD1,NDUFA12,UQCR11,TGM2,DNAI2,UQCRC1,NDUFA11
Pathway	83097	Alzheimer's disease	BioSystems: KEGG	2.213E-9	6.190E-6	1.997E-7	1.700E-6	44	171	APOE,ATP2A3,ATP5F1D,ATP5F1E,ATP5MC2,ATP5MC3,ATP5PO,BAD,FADD,NDUFA1,NDUFA2,NDUFA3,NDUFA6,NDUFA8,NDUFB2,NDUFB6,NDUFB7,NDUFB8,NDUFB10,NDUFV1,NDUFS6,NDUFS8,NDUFV3,CDK5R1,NOS1,UQCR10,PLCB2,PLCB3,NDUFB11,COX5B,NDUFS7,APH1A,SDHB,SDHC,UQCRQ,NDUFA12,UQCR11,GRIN2C,HSD17B10,TNFRSF1A,UQCRC1,NDUFA11,ITPR3,LRP1
Pathway	1270127	Respiratory electron transport, ATP synthesis by chemiosmotic coupling, and heat production by uncoupling proteins.	BioSystems: REACTOME	3.141E-9	8.785E-6	2.745E-7	2.337E-6	36	126	ATP5F1D,ATP5F1E,ATP5MC2,ATP5MC3,ATP5ME,ATP5PO,NDUFA1,NDUFA2,NDUFA3,NDUFA6,NDUFA8,NDUFB2,NDUFB6,NDUFB7,NDUFB8,NDUFB10,NDUFV1,NDUFS6,NDUFS8,NDUFV3,UQCR10,NDUFB11,COX5B,NDUFAF3,NDUFS7,SCO2,SDHB,SDHC,ATP5MG,UQCRQ,NDUFA12,SURF1,UQCR11,UCP2,UQCRC1,NDUFA11
Pathway	82942	Oxidative phosphorylation	BioSystems: KEGG	4.262E-9	1.192E-5	3.613E-7	3.076E-6	37	133	ATP5F1D,ATP5F1E,ATP5MC2,ATP5MC3,ATP5ME,ATP6V1B2,ATP5PO,NDUFA1,NDUFA2,NDUFA3,NDUFA6,NDUFA8,NDUFB2,NDUFB6,NDUFB7,NDUFB8,NDUFB10,NDUFV1,NDUFS6,NDUFS8,NDUFV3,ATP6V1F,UQCR10,NDUFB11,COX5B,ATP6V1G1,NDUFS7,COX17,TCIRG1,SDHB,SDHC,ATP5MG,UQCRQ,NDUFA12,UQCR11,UQCRC1,NDUFA11
Pathway	83098	Parkinson's disease	BioSystems: KEGG	8.579E-9	2.399E-5	7.057E-7	6.008E-6	38	142	ADCY5,ADORA2A,SLC25A5,ATP5F1D,ATP5F1E,ATP5MC2,ATP5MC3,ATP5PO,NDUFA1,NDUFA2,NDUFA3,NDUFA6,NDUFA8,NDUFB2,NDUFB6,NDUFB7,NDUFB8,NDUFB10,NDUFV1,NDUFS6,NDUFS8,NDUFV3,UQCR10,NDUFB11,COX5B,NDUFS7,SDHB,SDHC,UQCRQ,NDUFA12,GNAI2,UQCR11,PARK7,UBA7,UBE2G2,UCHL1,UQCRC1,NDUFA11
Pathway	1268854	Disease	BioSystems: REACTOME	5.121E-8	1.432E-4	4.093E-6	3.484E-5	135	867	FZD8,AP2A1,AP2A2,AKT1,FOXO4,SLC25A5,IRS2,BAD,BCR,BANF1,SYNGAP1,RPL10A,CDK5R1,NFKBIA,NFKBIB,AP1M1,NOTCH1,NOTCH2,NOTCH4,CALR,CAPNS1,PEBP1,FURIN,HGS,CDKN1A,RCC1,PHB,AP1S1,AP2S1,PIK3CD,PIK3R2,RPL36,DLL4,POLR2E,POLR2I,POLR2K,POLR2L,NCOR2,CSF2RA,CSK,NCAN,CSPG4,CTBP1,CTNNB1,MAP2K2,PSMA7,PSMB5,PSMB6,PSMB8,PSMB10,PSMC3,PSMD3,PSMD4,SV2A,RAN,RANGAP1,CHMP6,HDAC5,RBP1,VPS37B,RLBP1,EEF2,APH1A,RPL3,RPL6,RPL7A,R…
Pathway	1270128	Respiratory electron transport	BioSystems: REACTOME	5.421E-7	1.516E-3	4.212E-5	3.586E-4	28	103	NDUFA1,NDUFA2,NDUFA3,NDUFA6,NDUFA8,NDUFB2,NDUFB6,NDUFB7,NDUFB8,NDUFB10,NDUFV1,NDUFS6,NDUFS8,NDUFV3,UQCR10,NDUFB11,COX5B,NDUFAF3,NDUFS7,SCO2,SDHB,SDHC,UQCRQ,NDUFA12,SURF1,UQCR11,UQCRC1,NDUFA11
Pathway	1270121	The citric acid (TCA) cycle and respiratory electron transport	BioSystems: REACTOME	5.651E-7	1.581E-3	4.272E-5	3.637E-4	39	171	MDH2,ATP5F1D,ATP5F1E,ATP5MC2,ATP5MC3,ATP5ME,ATP5PO,NDUFA1,NDUFA2,NDUFA3,NDUFA6,NDUFA8,NDUFB2,NDUFB6,NDUFB7,NDUFB8,NDUFB10,NDUFV1,NDUFS6,NDUFS8,NDUFV3,BSG,UQCR10,NDUFB11,COX5B,NDUFAF3,NDUFS7,SCO2,RXRA,SDHB,SDHC,ATP5MG,UQCRQ,NDUFA12,SURF1,UQCR11,UCP2,UQCRC1,NDUFA11
Pathway	862188	Non-alcoholic fatty liver disease (NAFLD)	BioSystems: KEGG	1.024E-6	2.863E-3	7.534E-5	6.414E-4	35	149	AKT1,ATF4,IRS2,BAX,NDUFA1,NDUFA2,NDUFA3,NDUFA6,NDUFA8,NDUFB2,NDUFB6,NDUFB7,NDUFB8,NDUFB10,NDUFV1,NDUFS6,NDUFS8,NDUFV3,UQCR10,PIK3CD,PIK3R2,NDUFB11,COX5B,NDUFS7,RXRA,SDHB,SDHC,UQCRQ,SREBF1,NDUFA12,UQCR11,TNFRSF1A,UQCRC1,NDUFA11,JUN
Pathway	1339146	Complex I biogenesis	BioSystems: REACTOME	1.279E-6	3.577E-3	9.068E-5	7.721E-4	19	57	NDUFA1,NDUFA2,NDUFA3,NDUFA6,NDUFA8,NDUFB2,NDUFB6,NDUFB7,NDUFB8,NDUFB10,NDUFV1,NDUFS6,NDUFS8,NDUFV3,NDUFB11,NDUFAF3,NDUFS7,NDUFA12,NDUFA11
Pathway	PW:0000034	oxidative phosphorylation	Pathway Ontology	1.297E-6	3.627E-3	9.068E-5	7.721E-4	18	52	ATP5MC2,ATP5MC3,ATP6V1B2,NDUFA2,NDUFA3,NDUFA6,NDUFA8,NDUFB2,NDUFB6,NDUFB7,NDUFB8,NDUFB10,NDUFS6,NDUFS8,COX5B,COX17,SDHB,SDHC
Pathway	132956	Metabolic pathways	BioSystems: KEGG	4.463E-6	1.248E-2	3.044E-4	2.592E-3	174	1272	ACAA1,ACACB,ACADS,ACADVL,ACY1,MDH2,MGAT1,ADSL,AK1,ALAD,ALDH2,ALDOA,MPST,AMPD2,AOC2,NDST2,PDXK,ASL,POLD4,HYAL2,ATP5F1D,ATP5F1E,ATP5MC2,ATP5MC3,ATP5ME,ATP6V1B2,ATP5PO,CDS2,BCAT2,BCKDHA,NDUFA1,NDUFA2,NDUFA3,NDUFA6,NDUFA8,NDUFB2,NDUFB6,NDUFB7,NDUFB8,NDUFB10,NDUFV1,NDUFS6,NDUFS8,NDUFV3,BLVRB,NME2,NOS1,NOS3,CAD,NT5E,CBR1,CBR3,CBS,KYAT1,NANS,PAFAH1B3,PCK2,GLYCTK,DPM3,PFAS,ATP6V1F,PFKL,UQCR10,CKB,GRHPR,P…
Pathway	1268677	Metabolism of proteins	BioSystems: REACTOME	1.811E-5	5.065E-2	1.206E-3	1.027E-2	211	1631	ACADVL,MBD6,HIST1H4I,TOMM5,TRRAP,BAP1,ADORA2A,MFGE8,MGAT1,ADRA2A,ADRA2C,HIST1H2BE,HIST1H2BC,HIST1H4A,HIST1H4D,HIST1H4F,HIST1H4C,HIST1H4H,FOXO4,AMFR,MCFD2,CNIH2,APEH,CBX4,FUOM,ARF3,KHSRP,ARF5,SPTBN4,ARL2,ATF4,EIF3B,EIF3F,EIF3I,MDGA1,RPL10A,NFKBIA,EIF2B4,EIF2B2,CALR,NANS,FURIN,HGS,CDC34,RAB11B,DPM3,SRPRB,TBCB,TFPT,GMPPB,EXOSC4,TRAPPC6A,PMM1,TOMM7,RPL36,MPDU1,CSF2RA,SEC24C,KLHDC3,CSNK1D,GALNT9,DYNLL…
Pathway	P00029	Huntington disease	PantherDB	2.244E-5	6.276E-2	1.460E-3	1.243E-2	28	123	AP2A1,AP2A2,AKT1,ARF3,ARL4D,ARF5,ARF6,RHOG,BAX,HAP1,CAPNS1,NCOR2,DYNLL2,PRODH,DCTN1,DLG4,ARPC1B,DNAL4,TUBB4B,VAT1,ARPC1A,SIN3B,GRIN2C,DNAI2,ARFIP2,TUBB2A,TUBB2B,JUN
Pathway	P00005	Angiogenesis	PantherDB	2.452E-5	6.859E-2	1.559E-3	1.327E-2	32	150	FZD1,AKT1,RHOB,RHOC,BAD,NOS3,NOTCH1,NOTCH2,NOTCH4,PIK3CD,PIK3R2,DLL4,PRKCD,CTNNB1,DVL1,DVL2,APC2,DOK3,FGFR1,PRR5,FZD2,FRS3,STAT3,HRAS,WNT2,WNT7A,WNT7B,SPHK2,JAG2,JUN,FZD5,DLL1
Pathway	83062	Notch signaling pathway	BioSystems: KEGG	3.974E-5	1.111E-1	2.470E-3	2.103E-2	15	48	MFNG,NOTCH1,NOTCH2,NOTCH4,NUMBL,DLL4,NCOR2,CTBP1,DTX1,DVL1,DVL2,APH1A,JAG2,DLL1,LFNG
Pathway	1269649	Gene Expression	BioSystems: REACTOME	6.067E-5	1.697E-1	3.689E-3	3.140E-2	231	1844	H2AFV,MARS,WDR18,HIST1H4I,MEN1,METTL1,HIST1H2BE,HIST1H2BC,HIST1H4A,HIST1H4D,HIST1H4F,HIST1H4C,HIST1H4H,MLLT1,AKT1,DHX37,NOB1,APEH,APOE,MBD3,KHSRP,LAMTOR4,EIF3B,EIF3F,LSM2,EIF3I,SRSF9,BAX,ZSCAN25,RPL10A,CDK5R1,PIP4P1,EIF2B4,EIF2B2,BYSL,SNU13,NOTCH1,NOTCH2,NOTCH4,TAF1C,CCNB1,RRP9,PCBP1,TRMT61A,CDKN1A,CHD3,SRPRB,TSEN34,CPSF1,KCTD15,NOC4L,LSM4,TSR3,EXOSC4,MRM2,DDIT4,RPL36,DDX49,COX5B,POLR2E,POLR1C,PO…
Pathway	1435207	Breast cancer	BioSystems: KEGG	6.929E-5	1.938E-1	4.123E-3	3.510E-2	30	144	FZD1,FZD8,AKT1,CCND1,NOTCH1,NOTCH2,NOTCH4,CDKN1A,PIK3CD,PIK3R2,DLL4,CTNNB1,MAP2K2,FRAT1,DVL1,DVL2,APC2,FGFR1,FLT4,FGF22,FZD2,HRAS,WNT2,WNT7A,WNT7B,JAG2,JUN,FZD5,DLL1,LRP5
Pathway	1269539	NOTCH2 Activation and Transmission of Signal to the Nucleus	BioSystems: REACTOME	9.073E-5	2.538E-1	5.287E-3	4.501E-2	9	21	MDK,NOTCH2,DLL4,APH1A,RPS27A,UBC,MIB2,JAG2,DLL1
Pathway	373901	HTLV-I infection	BioSystems: KEGG	1.085E-4	3.035E-1	6.193E-3	5.272E-2	45	256	TRRAP,ADCY3,ADCY5,FZD1,FZD8,AKT1,ADCY4,SLC25A5,RANBP3,POLD4,ATF4,BAX,CCND1,NFATC2,NFKBIA,CALR,CCND3,CDKN1A,PIK3CD,PIK3R2,ANAPC2,POLD1,POLD2,CTNNB1,RAN,DVL1,DVL2,RELB,APC2,ANAPC11,SLC2A1,FZD2,SRF,TCF3,TLN1,TNFRSF1A,HLA-A,HLA-E,HRAS,WNT2,WNT7A,WNT7B,JAK3,JUN,FZD5
Pathway	1268759	IRE1alpha activates chaperones	BioSystems: REACTOME	1.486E-4	4.157E-1	8.314E-3	7.079E-2	16	59	ACADVL,SRPRB,KLHDC3,DCTN1,CTDSP2,PDIA6,CXXC1,HYOU1,SYVN1,MYDGF,TLN1,SEC61G,HSPA5,WFS1,ZBTB17,LMNA
Pathway	M8873	Fas Signaling Pathway	MSigDB C2 BIOCARTA (v6.0)	1.517E-4	4.242E-1	8.318E-3	7.081E-2	17	65	FADD,BAX,NFKBIA,NFKBIB,NFKBIL1,CAD,DEDD,MAPK8IP1,DAXX,DFFA,FAIM2,MAPK8IP3,NCS1,MAPK8IP2,TUFM,HSPB1,DIABLO
Pathway	SMP00355	Mitochondrial Electron Transport Chain	SMPDB	1.661E-4	4.645E-1	8.933E-3	7.606E-2	8	18	ATP5F1D,ATP5F1E,ATP5MC2,NDUFA1,SDHB,SDHC,GPD1,UQCRC1
Pathway	1269594	Signaling by Wnt	BioSystems: REACTOME	1.970E-4	5.511E-1	1.040E-2	8.853E-2	55	340	H2AFV,HIST1H4I,TRRAP,MEN1,FZD1,FZD8,HIST1H2BE,HIST1H2BC,AP2A1,AP2A2,AES,HIST1H4A,HIST1H4D,HIST1H4F,HIST1H4C,HIST1H4H,AKT1,BCL9L,PYGO2,AP2S1,PLCB2,PLCB3,SOX13,CSNK1G2,CTBP1,CTNNB1,PSMA7,PSMB5,PSMB6,PSMB8,PSMB10,PSMC3,PSMD3,PSMD4,PARD6A,RAC3,FRAT1,DVL1,DVL2,RPS27A,GNB5,H2AFJ,FZD2,AGO2,GNG7,TLE3,HIST1H2BB,SCRIB,UBC,WNT2,WNT7A,WNT7B,ITPR3,FZD5,LRP5
Pathway	1269611	PCP/CE pathway	BioSystems: REACTOME	2.038E-4	5.699E-1	1.055E-2	8.986E-2	22	98	FZD1,FZD8,AP2A1,AP2A2,AP2S1,PSMA7,PSMB5,PSMB6,PSMB8,PSMB10,PSMC3,PSMD3,PSMD4,PARD6A,RAC3,DVL1,DVL2,RPS27A,FZD2,SCRIB,UBC,FZD5
Pathway	1270303	Axon guidance	BioSystems: REACTOME	2.402E-4	6.719E-1	1.222E-2	1.040E-1	81	554	UNC5A,AP2A1,AP2A2,GIT1,SPTBN4,RHOB,RHOC,RHOG,IRS2,MYH9,MYL6,SYNGAP1,CDK5R1,CACNA1H,CACNB1,CAMK2B,PEBP1,PHB,AP2S1,PIK3CD,PIK3R2,NTN1,PLXNA1,PLXNB1,COL6A2,COL9A2,CSF2RA,PPP5C,CSK,NCAN,MAPK7,MAP2K2,PSMA7,PSMB5,PSMB6,PSMB8,PSMB10,PSMC3,PSMD3,PSMD4,DLG4,RAP1GAP,DUSP4,DUSP8,RET,ARPC1B,EFNB3,APH1A,MYH14,EPHA2,EPHB4,RPS27A,SCN5A,FES,FGFR1,AGAP2,ARPC1A,SHB,FGF22,DOK4,SLIT1,SPTB,FRS3,GPC1,GRIN2C,TLN1,LYPLA…
Pathway	1268756	Unfolded Protein Response (UPR)	BioSystems: REACTOME	2.587E-4	7.235E-1	1.292E-2	1.100E-1	21	93	ACADVL,KHSRP,ATF4,CALR,SRPRB,EXOSC4,KLHDC3,DCTN1,CTDSP2,PDIA6,CXXC1,HYOU1,SYVN1,MYDGF,TLN1,SEC61G,HSPA5,WFS1,ZBTB17,EXOSC5,LMNA
Pathway	1268887	Constitutive Signaling by NOTCH1 HD Domain Mutants	BioSystems: REACTOME	2.994E-4	8.375E-1	1.444E-2	1.229E-1	7	15	NOTCH1,DLL4,RPS27A,UBC,MIB2,JAG2,DLL1
Pathway	1268886	Signaling by NOTCH1 HD Domain Mutants in Cancer	BioSystems: REACTOME	2.994E-4	8.375E-1	1.444E-2	1.229E-1	7	15	NOTCH1,DLL4,RPS27A,UBC,MIB2,JAG2,DLL1
Pathway	1270307	Sema4D induced cell migration and growth-cone collapse	BioSystems: REACTOME	3.063E-4	8.566E-1	1.452E-2	1.236E-1	9	24	RHOB,RHOC,RHOG,MYH9,MYL6,PLXNB1,MYH14,LIMK1,LIMK2
Pathway	1269612	Asymmetric localization of PCP proteins	BioSystems: REACTOME	3.301E-4	9.234E-1	1.534E-2	1.306E-1	17	69	FZD1,FZD8,PSMA7,PSMB5,PSMB6,PSMB8,PSMB10,PSMC3,PSMD3,PSMD4,PARD6A,DVL2,RPS27A,FZD2,SCRIB,UBC,FZD5
Pathway	1383087	rRNA modification in the nucleus and cytosol	BioSystems: REACTOME	3.388E-4	9.475E-1	1.534E-2	1.306E-1	16	63	DHX37,SNU13,RRP9,NOC4L,TSR3,DDX49,IMP3,FBL,RPS2,RPS9,EMG1,NHP2,TBL3,PDCD11,RRP7A,NOL6
Pathway	1268760	XBP1(S) activates chaperone genes	BioSystems: REACTOME	3.400E-4	9.508E-1	1.534E-2	1.306E-1	15	57	ACADVL,SRPRB,KLHDC3,DCTN1,CTDSP2,PDIA6,CXXC1,HYOU1,SYVN1,MYDGF,TLN1,SEC61G,WFS1,ZBTB17,LMNA
Pathway	1269610	Beta-catenin independent WNT signaling	BioSystems: REACTOME	3.953E-4	1.000E0	1.755E-2	1.494E-1	29	151	FZD1,FZD8,AP2A1,AP2A2,AP2S1,PLCB2,PLCB3,CTNNB1,PSMA7,PSMB5,PSMB6,PSMB8,PSMB10,PSMC3,PSMD3,PSMD4,PARD6A,RAC3,DVL1,DVL2,RPS27A,GNB5,FZD2,AGO2,GNG7,SCRIB,UBC,ITPR3,FZD5
Pathway	1269856	Telomere Maintenance	BioSystems: REACTOME	4.162E-4	1.000E0	1.819E-2	1.548E-1	19	83	H2AFV,HIST1H4I,HIST1H2BE,HIST1H2BC,HIST1H4A,HIST1H4D,HIST1H4F,HIST1H4C,HIST1H4H,POLD4,POLD1,POLD2,RFC2,RPA2,FEN1,NHP2,H2AFJ,RUVBL2,HIST1H2BB
Pathway	1269195	Antigen processing-Cross presentation	BioSystems: REACTOME	4.291E-4	1.000E0	1.823E-2	1.552E-1	22	103	VAMP8,CALR,CYBA,PSMA7,PSMB5,PSMB6,PSMB8,PSMB10,PSMC3,PSMD3,PSMD4,MRC2,RPS27A,STX4,TAP1,TAP2,TAPBP,SEC61G,HLA-A,HLA-E,UBC,ITGB5
Pathway	P02738	De novo purine biosynthesis	PantherDB	4.312E-4	1.000E0	1.823E-2	1.552E-1	10	30	ADSL,AK1,NME2,PFAS,NME6,GART,GUK1,IMPDH1,IMPDH2,ADSSL1
Pathway	1269194	Antigen Presentation: Folding, assembly and peptide loading of class I MHC	BioSystems: REACTOME	4.366E-4	1.000E0	1.823E-2	1.552E-1	9	25	CALR,SEC24C,SEC13,TAP1,TAP2,TAPBP,HLA-A,HLA-E,HSPA5
Pathway	1270101	Integration of energy metabolism	BioSystems: REACTOME	5.074E-4	1.000E0	2.087E-2	1.777E-1	23	111	ACACB,ADCY3,ADCY5,ADRA2A,ADRA2C,ADCY4,SLC25A5,ARL2,PLCB2,PLCB3,FASN,RAPGEF3,AGPAT1,SLC2A1,GNB5,STK11,SYT5,GNA11,GNAI2,GNG7,TKT,ARL2BP,ITPR3
Pathway	1270135	Purine ribonucleoside monophosphate biosynthesis	BioSystems: REACTOME	5.250E-4	1.000E0	2.128E-2	1.812E-1	6	12	ADSL,PFAS,GART,IMPDH1,IMPDH2,ADSSL1
Pathway	799177	Estrogen signaling pathway	BioSystems: KEGG	5.486E-4	1.000E0	2.192E-2	1.866E-1	21	98	ADCY3,ADCY5,AKT1,ADCY4,ATF4,NOS3,PIK3CD,PIK3R2,PLCB2,PLCB3,ATF6B,PRKCD,MAP2K2,FKBP4,FKBP5,GNAI2,HRAS,HSPA1A,HSPA1B,ITPR3,JUN
Pathway	1269530	Signaling by NOTCH	BioSystems: REACTOME	6.607E-4	1.000E0	2.596E-2	2.211E-1	23	113	MDK,MFNG,ATP2A3,CCND1,NOTCH1,NOTCH2,NOTCH4,FURIN,DLL4,NCOR2,HDAC5,DTX1,APH1A,HDAC11,RPS27A,AGO2,TLE3,UBC,MIB2,JAG2,JUN,DLL1,LFNG
Pathway	1268714	Asparagine N-linked glycosylation	BioSystems: REACTOME	6.684E-4	1.000E0	2.596E-2	2.211E-1	46	285	MGAT1,AMFR,MCFD2,CNIH2,FUOM,ARF3,ARF5,SPTBN4,CALR,NANS,DPM3,GMPPB,TRAPPC6A,PMM1,MPDU1,SEC24C,CSNK1D,DYNLL2,TMED9,PRKCSH,MLEC,DCTN1,DDOST,DPAGT1,AMDHD2,RPS27A,TRAPPC4,SEC13,NAGK,NUDT14,ST3GAL2,PPP6R1,ARFGAP2,FUCA1,TRAPPC3,SYVN1,SPTB,LMAN2,ALG1,NEU4,MGAT4B,COPE,TSTA3,UBC,LMAN2L,RAB1B
Pathway	PW:0000071	valine, leucine and isoleucine degradation	Pathway Ontology	7.567E-4	1.000E0	2.860E-2	2.435E-1	7	17	ACAA1,ACADS,ALDH2,BCAT2,HSD17B10,HMGCL,IVD
Pathway	1269510	RHO GTPases Activate ROCKs	BioSystems: REACTOME	7.567E-4	1.000E0	2.860E-2	2.435E-1	7	17	RHOB,RHOC,MYH9,MYL6,MYH14,LIMK1,LIMK2
Pathway	1269197	ER-Phagosome pathway	BioSystems: REACTOME	7.746E-4	1.000E0	2.889E-2	2.459E-1	19	87	VAMP8,CALR,PSMA7,PSMB5,PSMB6,PSMB8,PSMB10,PSMC3,PSMD3,PSMD4,RPS27A,STX4,TAP1,TAP2,TAPBP,SEC61G,HLA-A,HLA-E,UBC
Pathway	1269443	Signalling by NGF	BioSystems: REACTOME	7.991E-4	1.000E0	2.941E-2	2.504E-1	70	483	ADCY3,ADCY5,ADCYAP1R1,ADORA2A,GRK2,AP2A1,AP2A2,AKT1,FOXO4,ARHGEF37,PREX1,ADCY4,SPTBN4,ARHGDIA,IRS2,BAD,SYNGAP1,IER3,SQSTM1,NFKBIA,CAMK2B,PEBP1,FURIN,CDKN1A,PDE1B,PHB,AP2S1,PIK3CD,PIK3R2,ARHGEF19,CSF2RA,PPP5C,CSK,PRKCD,MAPK7,MAP2K2,PSMA7,PSMB5,PSMB6,PSMB8,PSMB10,PSMC3,PSMD3,PSMD4,DLG4,DUSP4,DUSP8,RET,DNAL4,APH1A,RPS27A,FGFR1,PRR5,FGF22,BEX3,ARHGEF40,SMPD2,AGO2,SPTB,FRS3,STAT3,MLST8,GRIN2C,TLN1,UBC…
Pathway	1270305	Sema4D in semaphorin signaling	BioSystems: REACTOME	8.339E-4	1.000E0	3.029E-2	2.579E-1	9	27	RHOB,RHOC,RHOG,MYH9,MYL6,PLXNB1,MYH14,LIMK1,LIMK2
Pathway	1269520	RHO GTPases Activate Rhotekin and Rhophilins	BioSystems: REACTOME	8.692E-4	1.000E0	3.116E-2	2.653E-1	5	9	RHPN1,RHOB,RHOC,TAX1BP3,RHPN2
Pathway	83059	mTOR signaling pathway	BioSystems: KEGG	8.800E-4	1.000E0	3.116E-2	2.653E-1	28	151	FZD1,FZD8,AKT1,ULK1,LAMTOR4,FLCN,ATP6V1B2,ATP6V1F,PIK3CD,PIK3R2,DDIT4,ATP6V1G1,MAP2K2,LAMTOR1,DVL1,DVL2,SEC13,PRR5,FZD2,STK11,MLST8,TNFRSF1A,HRAS,WNT2,WNT7A,WNT7B,FZD5,LRP5
Pathway	83068	ECM-receptor interaction	BioSystems: KEGG	9.897E-4	1.000E0	3.460E-2	2.946E-1	18	82	COL1A2,COL6A2,COL9A2,SV2A,LAMC3,SDC4,ITGA11,GP1BB,THBS3,TNXB,HSPG2,VWF,ITGA5,ITGB4,ITGB5,LAMB1,LAMB2,LAMB3
Pathway	M5493	Genes related to Wnt-mediated signal transduction	MSigDB C2 BIOCARTA (v6.0)	1.037E-3	1.000E0	3.580E-2	3.048E-1	19	89	FZD1,FZD8,AES,CCND1,CCND3,SLC9A3R1,CSNK1D,CTBP1,CTNNB1,FRAT1,DVL1,DVL2,FZD2,WNT2,WNT7A,WNT7B,JUN,FZD5,LRP5
Pathway	137972	Signaling events mediated by HDAC Class III	BioSystems: Pathway Interaction Database	1.109E-3	1.000E0	3.700E-2	3.150E-1	11	39	HIST1H4I,HIST1H4A,HIST1H4D,HIST1H4F,HIST1H4C,HIST1H4H,FOXO4,BAX,CDKN1A,TUBA1B,TUBB2A
Pathway	137962	Wnt signaling network	BioSystems: Pathway Interaction Database	1.122E-3	1.000E0	3.700E-2	3.150E-1	9	28	FZD1,FZD8,FZD2,WNT2,WNT7A,WNT7B,IGFBP4,FZD5,LRP5
Pathway	1270129	Formation of ATP by chemiosmotic coupling	BioSystems: REACTOME	1.132E-3	1.000E0	3.700E-2	3.150E-1	7	18	ATP5F1D,ATP5F1E,ATP5MC2,ATP5MC3,ATP5ME,ATP5PO,ATP5MG
Pathway	1269534	Pre-NOTCH Processing in Golgi	BioSystems: REACTOME	1.132E-3	1.000E0	3.700E-2	3.150E-1	7	18	MFNG,ATP2A3,NOTCH1,NOTCH2,NOTCH4,FURIN,LFNG
Pathway	1268855	Diseases of signal transduction	BioSystems: REACTOME	1.138E-3	1.000E0	3.700E-2	3.150E-1	56	373	FZD8,AKT1,FOXO4,IRS2,BAD,BCR,SYNGAP1,NOTCH1,PEBP1,CDKN1A,PHB,PIK3CD,PIK3R2,DLL4,POLR2E,POLR2I,POLR2K,POLR2L,NCOR2,CSK,CTBP1,CTNNB1,MAP2K2,PSMA7,PSMB5,PSMB6,PSMB8,PSMB10,PSMC3,PSMD3,PSMD4,HDAC5,RBP1,RLBP1,APH1A,HDAC11,RPS27A,FGFR1,PRR5,FGF22,SYVN1,STAT3,STRA6,MLST8,CDC37,TLN1,UBC,HRAS,VWF,MIB2,JAG2,FZD5,AGTRAP,DLL1,LMNA,LRP5
Pathway	1269460	NGF signalling via TRKA from the plasma membrane	BioSystems: REACTOME	1.180E-3	1.000E0	3.792E-2	3.229E-1	58	390	ADCY3,ADCY5,ADCYAP1R1,ADORA2A,GRK2,AP2A1,AP2A2,AKT1,FOXO4,ADCY4,SPTBN4,IRS2,BAD,SYNGAP1,IER3,CAMK2B,PEBP1,CDKN1A,PDE1B,PHB,AP2S1,PIK3CD,PIK3R2,CSF2RA,PPP5C,CSK,PRKCD,MAPK7,MAP2K2,PSMA7,PSMB5,PSMB6,PSMB8,PSMB10,PSMC3,PSMD3,PSMD4,DLG4,DUSP4,DUSP8,RET,DNAL4,RPS27A,FGFR1,PRR5,FGF22,AGO2,SPTB,FRS3,STAT3,MLST8,GRIN2C,TLN1,UBC,HRAS,VWF,ITPR3,JAK3
Pathway	1270431	Senescence-Associated Secretory Phenotype (SASP)	BioSystems: REACTOME	1.239E-3	1.000E0	3.938E-2	3.353E-1	22	111	H2AFV,HIST1H4I,HIST1H2BE,HIST1H2BC,HIST1H4A,HIST1H4D,HIST1H4F,HIST1H4C,HIST1H4H,CDKN1A,CDKN2D,ANAPC2,MAPK7,RPS27A,FZR1,ANAPC11,H2AFJ,STAT3,EHMT2,HIST1H2BB,UBC,JUN
Pathway	169345	Notch signaling pathway	BioSystems: Pathway Interaction Database	1.342E-3	1.000E0	4.216E-2	3.589E-1	14	58	CCND1,NOTCH1,NOTCH2,NOTCH4,FURIN,CDKN1A,DLL4,NCOR2,CTBP1,DTX1,APH1A,ENO1,JAG2,DLL1
Pathway	142277	purine nucleotides de novo biosynthesis	BioSystems: BIOCYC	1.394E-3	1.000E0	4.332E-2	3.688E-1	11	40	AK1,ATP5F1D,ATP5ME,NME2,NME6,ATP5MG,GART,GUK1,IMPDH1,IMPDH2,ADSSL1
Pathway	137914	Presenilin action in Notch and Wnt signaling	BioSystems: Pathway Interaction Database	1.420E-3	1.000E0	4.363E-2	3.715E-1	12	46	FZD1,AES,CCND1,NOTCH1,CTBP1,CTNNB1,FRAT1,DTX1,DVL1,APH1A,JUN,DLL1
Pathway	125136	Spliceosome	BioSystems: KEGG	1.483E-3	1.000E0	4.501E-2	3.832E-1	25	134	CCDC12,LSM2,SRSF9,SNU13,PCBP1,LSM4,SYF2,SF3B5,EIF4A3,SF3B4,PPIE,CHERP,PUF60,PPIL1,SNRNP70,SNRPA,SNRPD2,LSM7,SNRPG,PRPF19,U2AF2,HSPA1A,HSPA1B,DDX39B,SF3A2
Pathway	1309120	Gap-filling DNA repair synthesis and ligation in TC-NER	BioSystems: REACTOME	1.496E-3	1.000E0	4.501E-2	3.832E-1	15	65	POLD4,POLD1,POLD2,POLR2E,POLR2I,POLR2K,POLR2L,RFC2,RPA2,RPS27A,PPIE,PRPF19,HMGN1,UBC,XRCC1
Pathway	1269863	Removal of the Flap Intermediate from the C-strand	BioSystems: REACTOME	1.596E-3	1.000E0	4.749E-2	4.043E-1	5	10	POLD4,POLD1,POLD2,RPA2,FEN1
Pubmed	16169070	A human protein-protein interaction network: a resource for annotating the proteome.	Pubmed	5.964E-114	8.577E-109	8.577E-109	1.068E-107	333	1678	DPF1,MAFG,MARS,WDR18,MCM2,LMTK3,MDH2,MBD6,MDK,REXO1,AP2A1,AES,MIF,DISP3,IGSF9,ALDH2,LRFN1,GIT1,MAGEH1,APEH,APLP1,CBX4,ARL4D,PTOV1,ARHGDIA,ATF4,EIF3F,LSM2,MYH9,MYL6,FXYD6,FADD,NDUFA1,NDUFA6,BCR,NDUFB8,NDUFS6,NDUFV3,NFATC2,SQSTM1,NFKBIA,EIF2B2,SNU13,NME2,ZNF598,FMNL1,NOTCH1,CA12,DDR1,SELENBP1,HAP1,TRIM41,CAPNS1,SERPINH1,OGG1,CBR1,CBR3,CCND3,PEBP1,PAFAH1B3,FIBP,CD81,CDKN1A,RAB11B,TBRG4,ATP6V1F,CHD3,…
Pubmed	28378742	Fancd2 in vivo interaction network reveals a non-canonical role in mitochondrial function.	Pubmed	1.136E-77	1.634E-72	8.170E-73	1.017E-71	272	1577	ACAA1,MARS,WDR18,MCM2,TRRAP,ADSL,ALDH2,SLC25A29,ALDOA,MPST,SLC25A5,ANXA2,LEMD2,DBNL,APOE,KHSRP,ARF5,ARF6,RHOG,ARL2,EIF3B,EIF3F,ATP2A3,SRSF9,MYH9,ATP5PO,MYL6,AUP1,CDS2,BCKDHA,MATN4,NDUFA8,RPL10A,BSG,SNU13,C1QC,C4B,CAD,HIP1R,CTDSP1,AIP,SERPINH1,PEBP1,ENTPD6,PALM,PCBP1,PEX10,PFAS,CHD3,PFKL,SRPRB,SLC25A3,CLIC1,DDX54,TSEN34,CPSF1,NLE1,PLEC,TMCO1,DCTPP1,UAP1L1,PLTP,CNN2,CNP,MXRA8,POLR1C,KANK2,TRAF4,SEC…
Pubmed	22863883	A high-throughput approach for measuring temporal changes in the interactome.	Pubmed	2.039E-77	2.932E-72	9.774E-73	1.217E-71	260	1456	H2AFV,MARS,MCM2,LRRC47,METTL1,EHBP1L1,ADSL,AES,HIST1H4A,ALAD,ALDOA,AMPD2,GIT1,ANXA2,RANBP3,DBNL,APEH,KHSRP,ARL2,CCDC124,ASL,CCAR2,EIF3B,EIF3F,LSM2,EIF3I,ATP6V1B2,MYH9,MYL6,SQSTM1,EIF2B2,BYSL,SNU13,AP1M1,H1FX,CALR,CAPNS1,AIP,SERPINH1,CBS,DPP9,NANS,HGS,PAFAH1B3,CDC34,PCBP1,TRMT61A,PFAS,ATP6V1F,PFKL,CKB,TBCB,SLC9A3R1,ASB6,TSEN34,PLCB3,PLEC,DCTPP1,EPN1,GMPPB,PLOD1,EXOSC4,CNN2,RPL36,UBQLN2,POLD1,POLD2…
Pubmed	24457600	The central role of EED in the orchestration of polycomb group complexes.	Pubmed	2.221E-72	3.194E-67	7.985E-68	9.944E-67	277	1719	MARS,WDR18,MCM2,TRRAP,MEN1,AP2A1,AP2A2,ALDOA,KIF17,VPS18,SLC25A5,HCN3,NOB1,CBX4,ARF3,KHSRP,ARF6,RHOC,ARHGDIA,ARL2,GLIPR2,CCAR2,EIF3B,EIF3F,EIF3I,MDGA1,ATP2A3,SRSF9,ATP5ME,MYH9,ATP5PO,MYL6,BAX,NDUFA6,NDUFA8,RPL10A,BYSL,SNU13,AP1M1,H1FX,SELENBP1,CALR,TRIM41,CAPNS1,SERPINH1,CBR1,RRP9,PCBP1,CEP170B,CHMP1A,RAB11B,RCC1,CHD3,PFKL,UQCR10,PHB,CKB,SLC25A3,AP2S1,CLIC1,DDX54,SNX8,CPSF1,NOC4L,PLEC,PYCR2,TMCO1…
Pubmed	19738201	Proteomic analysis of integrin-associated complexes identifies RCC2 as a dual regulator of Rac1 and Arf6.	Pubmed	7.137E-70	1.027E-64	2.053E-65	2.557E-64	170	707	H2AFV,MARS,MCM2,MDH2,HIST1H4I,AP2A1,AP2A2,HIST1H4A,HIST1H4D,HIST1H4F,HIST1H4C,HIST1H4H,MIF,ALDOA,SLC25A5,ANXA2,KHSRP,AKR7A2,ARF6,ARL2,CCAR2,EIF3B,EIF3F,EIF3I,VAMP8,SRSF9,ATP5ME,ATP6V1B2,MYH9,ATP5PO,MYL6,NDUFA2,RPL10A,BYSL,SNU13,CAPNS1,HIP1R,PAFAH1B3,PCBP1,RCC1,PFKL,PHB,AP2S1,CLIC1,PIK3R2,SNX15,PLEC,PYCR2,EPN1,CNN2,RPL36,COMT,POLR1C,KANK2,SEC24C,EIF4A3,PSMA7,PSMB5,PSMB6,PSMD3,DBN1,PTBP1,DDOST,PHGD…
Pubmed	25921289	Temporal proteomics of NGF-TrkA signaling identifies an inhibitory role for the E3 ligase Cbl-b in neuroblastoma cell differentiation.	Pubmed	1.661E-67	2.389E-62	3.982E-63	4.959E-62	287	1922	ACADVL,MARS,MCM2,MDH2,GPRIN1,LRRC47,ADSL,AP2A1,AP2A2,ALDH2,ALDOA,AMFR,AMPD2,VPS18,GIT1,SLC25A5,ANXA2,RANBP3,DBNL,APEH,KHSRP,ARHGDIA,CCDC124,MRPL15,FHOD1,CCAR2,IRS2,EIF3B,EIF3F,EIF3I,ATP1A3,SRSF9,ATP6V1B2,MYH9,AUP1,BCR,RPL10A,BSG,EIF2B4,AP1M1,ZNF598,H1FX,CAD,CALR,HIP1R,SERPINH1,CBR1,CBS,DPP9,NANS,HGS,PAFAH1B3,PCBP1,PCK2,LRWD1,TBRG4,PFAS,PFKL,SRPRB,PHB,CKB,SLC25A3,TBCB,CACTIN,SLC9A3R1,CLIC1,PIK3R2,…
Pubmed	23376485	Proteomic analysis of podocyte exosome-enriched fraction from normal human urine.	Pubmed	7.260E-65	1.044E-59	1.492E-60	1.858E-59	267	1744	ACY1,MDH2,HIST1H4I,MFGE8,MGAT1,HIST1H2BE,HIST1H2BC,HIST1H4A,HIST1H4D,HIST1H4F,HIST1H4C,HIST1H4H,MIF,AK1,ALAD,ALDH2,ALDOA,LTBP4,MPST,SLC25A5,ANXA2,APOE,PDXK,ARF3,ARF6,RHOC,RHOG,SCRN2,ARHGDIA,ARL2,NUDT1,DLK2,GLIPR2,VAMP8,ATP6V1B2,EDF1,MYH9,ATP5PO,MYL6,AXL,BAX,NDUFB10,BANF1,BLVRB,BSG,C1QC,C4B,DDR1,SELENBP1,PGLYRP1,CALR,CAPNS1,CTDSP1,SERPINH1,CBR1,TMED4,CLDN11,NANS,PEBP1,PAFAH1B3,ENTPD6,FIBP,CD81,PCB…
Pubmed	21145461	Dynamics of cullin-RING ubiquitin ligase network revealed by systematic quantitative proteomics.	Pubmed	8.210E-64	1.181E-58	1.476E-59	1.838E-58	261	1696	H2AFV,KCTD13,MARS,WDR18,MCM2,MDH2,HIST1H4I,TRRAP,LRRC47,HIST1H4A,HIST1H4D,HIST1H4F,HIST1H4C,HIST1H4H,MLLT6,ALDH2,ALDOA,MPP2,SLC25A5,ANXA2,ENC1,DBNL,GADD45GIP1,PDXK,KHSRP,PTOV1,ARHGDIA,CCDC124,MRPL15,NUDT1,CCAR2,EIF3I,SRSF9,MYH9,MYL6,BCKDHA,NDUFV1,RPL10A,BSG,BYSL,SNU13,H1FX,CAD,CBR1,CBR3,CCNB1,PCBP1,TRMT61A,ABT1,SRPRB,PHB,CKB,SLC25A3,CAMKV,ASB6,DDA1,PIK3R2,ANAPC2,PEX16,CPSF1,NLE1,PLEC,PYCR2,DCTPP1…
Pubmed	16189514	Towards a proteome-scale map of the human protein-protein interaction network.	Pubmed	3.604E-60	5.183E-55	5.758E-56	7.171E-55	244	1573	KCTD13,MATK,MIF4GD,MCM2,ACY1,RHPN1,METTL1,MIF,MLLT6,C1QTNF1,BEGAIN,COL20A1,MAGEH1,DBNL,APEH,CHST1,PDLIM4,AKR7A2,RHOC,ARL2,ASL,DLK2,ATF4,EIF3F,LSM2,MYL6,BAD,NDUFV1,CDK5R1,LDB1,BSG,SQSTM1,NFKBIA,BYSL,AP1M1,SELENBP1,TRIM41,CTDSP1,CBS,CCND3,AP5B1,HGS,PAFAH1B3,CDKN1A,CDKN2D,GLYCTK,PFKL,CKB,TFPT,PGLS,NLE1,NOC4L,LSM4,BAMBI,SNX15,DCTPP1,GMPPB,HOMER3,TRAPPC6A,YIPF3,CHAC1,CNTFR,PMM1,SPEF1,NECAB2,COMT,S100A…
Pubmed	24711643	Identifying biological pathways that underlie primordial short stature using network analysis.	Pubmed	4.550E-56	6.544E-51	6.544E-52	8.150E-51	186	1024	H2AFV,ACADVL,MARS,WDR18,MCM2,MDH2,HIST1H4I,TRRAP,AP2A1,HIST1H4A,HIST1H4D,HIST1H4F,HIST1H4C,HIST1H4H,MIF,SLC25A5,ANXA2,GADD45GIP1,KHSRP,ARHGDIA,CCAR2,EIF3B,SRSF9,ATP6V1B2,ATP5PO,RPL10A,SQSTM1,H1FX,CAD,CALR,SERPINH1,CBR1,RRP9,PAFAH1B3,PCBP1,RAB11B,LRWD1,RCC1,CHD3,PFKL,SRPRB,PHB,CKB,SLC25A3,SCAF1,CLIC1,DDX54,CPSF1,NLE1,NOC4L,PLEC,PLOD1,CNP,RPL36,POLR2E,SEC24C,SOGA1,TMED9,PRKCSH,CTNNB1,EIF4A3,INTS1,P…
Pubmed	19946888	Defining the membrane proteome of NK cells.	Pubmed	9.386E-55	1.350E-49	1.227E-50	1.528E-49	198	1168	ABCA2,ACAA1,MARS,HIST1H4I,ADCY3,MFGE8,EHBP1L1,MGAT1,GRK2,AP2A1,HIST1H4A,HIST1H4D,HIST1H4F,HIST1H4C,HIST1H4H,ALDOA,ALOX5AP,AMFR,GIT1,SLC25A5,ANXA2,LEMD2,APOE,KHSRP,ARF6,FHOD1,EIF3F,MYH9,MYL6,AUP1,CDS2,BAX,BCR,RPL10A,BSG,BYSL,AP1M1,FMNL1,NOTCH2,CAD,CALR,FURIN,PAFAH1B3,CD81,PCBP1,DPM3,PFKL,PHB,SLC25A3,AP1S1,LMF2,CLIC1,DDX54,PEX16,CNN2,CNP,RPL36,COMT,POLD1,MPDU1,POR,GTPBP1,NCOR2,SYNE3,LRP10,CSNK1G2,D…
Pubmed	20458337	MHC class II-associated proteins in B-cell exosomes and potential functional implications for exosome biogenesis.	Pubmed	4.378E-51	6.296E-46	5.247E-47	6.534E-46	130	565	MARS,MDH2,HIST1H4I,MFGE8,HIST1H2BE,HIST1H2BC,HIST1H4A,HIST1H4D,HIST1H4F,HIST1H4C,HIST1H4H,MIF,ALDOA,ANXA2,APEH,APOE,ARF3,ARF6,RHOG,ARHGDIA,EIF3B,EIF3I,VAMP8,MYH9,MYL6,BAX,RPL10A,BSG,NME2,FMNL1,CAD,NT5E,PEBP1,CD81,PCBP1,RAB11B,PFAS,PFKL,PHB,SLC9A3R1,GRHPR,CLIC1,PLXNA1,TMED9,PSMA7,PSMB6,PSMB8,DBI,PTBP1,PHGDH,MVP,FERMT3,RAN,CHMP6,PDCD6,SCAMP3,DPP3,ECH1,ARPC1B,EEF2,PDIA6,RNH1,ENO1,ENO2,RPL3,RPL11,RPL…
Pubmed	21900206	A directed protein interaction network for investigating intracellular signal transduction.	Pubmed	7.483E-50	1.076E-44	8.278E-46	1.031E-44	186	1123	MARS,WDR18,MDK,MGAT1,GRK2,AKT1,MPP2,AMFR,LRFN1,GIT1,APLP1,BLOC1S2,KHSRP,SPTBN4,ARHGDIA,EDF1,BAD,FADD,NDUFA2,NDUFS6,SQSTM1,CA12,DDR1,SELENBP1,HAP1,CALR,TAF1C,SERPINH1,CBS,ENTPD6,FIBP,PCDH8,CDKN1A,PDE1B,RCC1,CHD3,CKB,NRXN2,ANAPC2,BAMBI,CNTFR,ANKRD35,NDUFB11,DDIT4,COMT,RETREG2,POLR2E,CRELD2,POR,CRIP2,CRYM,PPP4C,PPP5C,CSNK1D,CSNK1G2,CSTB,CTBP1,PRKCSH,DHX34,PSAP,PSMA7,PSMB10,CC2D1A,DAXX,FAM110A,DBI,KE…
Pubmed	26972000	Substrate-Trapped Interactors of PHD3 and FIH Cluster in Distinct Signaling Pathways.	Pubmed	4.595E-49	6.608E-44	4.720E-45	5.878E-44	220	1517	GTPBP6,MCRIP1,CASKIN2,CASKIN1,MLLT1,VPS18,SLC25A5,NOB1,DBNL,PTOV1,FLCN,CCAR2,IRS2,AUP1,NDUFA6,NDUFA8,BCR,NDUFB10,NDUFS8,BSG,SQSTM1,NFKBIA,NFKBIB,ANKRD52,NOTCH2,CAD,AIP,SERPINH1,CBS,PCBP1,CEP170B,DPM3,PFAS,RCC1,UQCR10,SRPRB,TAOK2,SLC25A3,AP2S1,ASB6,DDA1,PIK3R2,DDX54,KCTD15,NOC4L,TMCO1,GMPPB,CNN2,CNP,POLD1,POLR2E,NDUFAF3,POLR1C,POLR2L,KANK2,PARS2,AAR2,NCOR2,PPP5C,SOGA1,CSNK1D,SLC25A10,PRKCD,CTBP1,C…
Pubmed	8125298	Oligo-capping: a simple method to replace the cap structure of eukaryotic mRNAs with oligoribonucleotides.	Pubmed	9.308E-49	1.339E-43	8.924E-45	1.111E-43	250	1883	GTPBP6,ACADVL,MARS,MATK,BAP1,METTL1,MFGE8,ADSL,AP2A2,AK1,ALDH2,MPP2,ANXA2,RANBP3,PDXK,PDLIM4,AKR7A2,ARL2,ORMDL2,EIF3I,ATP1A3,SAMD14,HYAL2,ATP5PO,FGFRL1,BCAT2,NDUFV1,NDUFS8,IER3,WRAP73,NOS3,CALR,CAMK2B,CBR3,PEBP1,FIBP,CD151,RAB11B,TBRG4,UQCR10,PHB,SLC25A3,GDAP1L1,SH3TC1,CLIC1,ASB6,TSEN34,KCTD15,BAMBI,SNX15,PLTP,CNN2,NENF,COL1A2,DDX49,NOP53,PLEKHF1,MPDU1,MXRA8,POLRMT,CRELD2,KANK2,CRIP2,PTPA,NKAIN4,…
Pubmed	25963833	Quantitative Proteomics Reveals Dynamic Interactions of the Minichromosome Maintenance Complex (MCM) in the Cellular Response to Etoposide Induced DNA Damage.	Pubmed	1.223E-46	1.759E-41	1.099E-42	1.369E-41	154	844	H2AFV,ACADVL,MARS,MCM2,HIST1H4I,HIST1H2BE,HIST1H2BC,ADSL,AP2A1,AP2A2,HIST1H4A,HIST1H4D,HIST1H4F,HIST1H4C,HIST1H4H,MIF,ALDOA,SLC25A5,ANXA2,KHSRP,EIF3B,EIF3F,MYH9,ATP5PO,MYL6,RPL10A,SNU13,C4B,NME2,CAD,CALR,SERPINH1,PCBP1,CHMP1A,TBRG4,CHD3,SLC25A3,PLEC,TMCO1,CNP,CSK,CSRP2,DYNLL2,CSTB,CTNNB1,TBKBP1,MLEC,PSMA7,PSMB5,PSMB6,PSMD3,DBN1,PTBP1,DDOST,PHGDH,PYGB,MVP,PDCD6,NOSIP,EEF1B2,EEF2,PDIA6,RNH1,MYH14,E…
Pubmed	22623428	Proteomic analysis of ?4?1 integrin adhesion complexes reveals ?-subunit-dependent protein recruitment.	Pubmed	4.347E-46	6.251E-41	3.677E-42	4.580E-41	115	491	MARS,MCM2,MDH2,HIST1H4I,HIST1H2BE,HIST1H2BC,AP2A1,HIST1H4A,HIST1H4D,HIST1H4F,HIST1H4C,HIST1H4H,MIF,ALDOA,SLC25A5,ANXA2,ARF3,KHSRP,ARF5,AKR7A2,CCAR2,EIF3B,EIF3I,VAMP8,SRSF9,ATP5ME,MYH9,ATP5PO,MYL6,NDUFA2,RPL10A,SNU13,CAD,CAPNS1,HIP1R,PAFAH1B3,PCBP1,RCC1,PFKL,PHB,AP2S1,CLIC1,PIK3R2,PLEC,EPN1,RPL36,SEC24C,EIF4A3,PSMA7,PSMB6,PSMD3,PTBP1,NQO1,FERMT3,RAN,PDCD6,UPF1,EEF1B2,EEF2,DAZAP1,TRIM28,ENO1,RPL7A,…
Pubmed	21832049	Interactions of pathological hallmark proteins: tubulin polymerization promoting protein/p25, beta-amyloid, and alpha-synuclein.	Pubmed	7.408E-46	1.065E-40	5.919E-42	7.371E-41	245	1891	H2AFV,PPP1R14A,MCM2,ACY1,HIST1H4I,TOMM5,AP2A2,AK1,MLLT6,AKT1,THAP3,ALDH2,PDZD4,BEGAIN,MCFD2,ANXA2,MAGEH1,NOB1,NTMT1,BLOC1S2,GADD45GIP1,ARL4D,ARF6,DLK2,FLCN,ATF4,EIF3F,SRSF9,TPRA1,PELI3,BCAT2,NDUFA2,NDUFB6,CDK5R1,IER3,NFKBIB,EIF2B2,BYSL,NNAT,FMNL1,CACNB1,DIRAS1,TRIM41,KYAT1,CCND3,HGS,FIBP,PCBP1,DEDD,PCK2,CDKN1A,CDKN2D,RAB11B,PDYN,PFKL,TFPT,CAMKV,ASB6,PIM1,PIK3R2,DDX54,PYCR2,DCTPP1,HOMER3,BRMS1,RPL…
Pubmed	26618866	?F508 CFTR interactome remodelling promotes rescue of cystic fibrosis.	Pubmed	2.078E-45	2.989E-40	1.573E-41	1.959E-40	131	640	ACADVL,MARS,MCM2,MDH2,MEN1,ALDOA,AMFR,DBNL,PDXK,KHSRP,CCAR2,EIF3F,EIF3I,ATP2A3,SRSF9,MYH9,ATP5PO,MYL6,AUP1,RPL10A,BSG,EIF2B4,H1FX,CAD,CALR,SERPINH1,CBR1,PFKL,PHB,SLC25A3,SLC9A3R2,SLC9A3R1,CLIC1,PLEC,CNN2,RPL36,NOP53,POLR2E,SEC24C,SLC25A10,PRKCSH,CTNNB1,TES,PSMA7,PSMB5,PSMB8,PSMC3,PSMD3,PSMD4,DBN1,DCTN1,DDOST,PHGDH,PYGB,MVP,UPF1,IPO4,RFC2,ARPC1B,EXOC8,EEF1B2,EEF2,PDIA6,DAZAP1,RNH1,MYH14,TRIM28,ENO…
Pubmed	21319273	An important role for CDK2 in G1 to S checkpoint activation and DNA damage response in human embryonic stem cells.	Pubmed	6.989E-45	1.005E-39	5.026E-41	6.259E-40	102	397	MCM2,MDH2,MIF,ALDOA,ANXA2,KHSRP,RHOC,ARHGDIA,EIF3I,ATP2A3,ATP5F1D,MYH9,ATP5PO,MYL6,RPL10A,SNU13,CAD,CALR,SERPINH1,CBS,PCBP1,RAB11B,PHB,CKB,SLC25A3,CLIC1,PLEC,RPL36,EIF4A3,PSMB6,PSMD3,PTBP1,PHGDH,AURKAIP1,RAN,UPF1,EEF2,PDIA6,TRIM28,ENO1,ENO2,RPL3,RPL6,RPL8,RPL11,RPL18,RPL27,RPL27A,RPL28,RPL31,RPLP0,RPLP2,RPS2,RPS3,RPS4X,RPS5,RPS8,RPS9,RPS10,RPS12,RPS15A,RPS16,RPS20,RPS21,RPS23,RPS27A,RPS28,TUBB4B,…
Pubmed	17353931	Large-scale mapping of human protein-protein interactions by mass spectrometry.	Pubmed	1.090E-44	1.567E-39	7.462E-41	9.293E-40	192	1284	MARS,TRRAP,MEN1,HIST1H2BC,AES,MIF,AK1,ULK1,PREX1,AMFR,VPS18,GIT1,ANXA2,DHX37,RANBP3,DBNL,KHSRP,ARF6,RHOC,ARHGDIA,NUDT1,CCAR2,IRS2,EIF3F,EIF3I,ATP2A3,MYH9,MYL6,AUP1,BCKDHA,BSG,SQSTM1,NFKBIL1,WRAP73,NME2,CALR,CAMK2B,NTHL1,OGG1,CBR1,PEBP1,FIBP,DEDD,CHMP1A,TBRG4,PFAS,SRPRB,CACTIN,AP1S1,AP2S1,LSM4,RPL36,POLD1,TNPO2,COX5B,MPDU1,POLR1C,PPP1R8,PPP4C,KLHDC3,CSNK1D,DYNLL2,CSTB,CTNNB1,QPCTL,PSMA7,PSMB5,PSMC…
Pubmed	18614015	A mitochondrial protein compendium elucidates complex I disease biology.	Pubmed	6.180E-42	8.888E-37	4.040E-38	5.031E-37	160	982	CLPP,ACAA1,ACACB,ACADS,ACADVL,MARS,MDH2,COMTD1,ADSL,ALDH2,SLC25A29,MPST,SLC25A5,GADD45GIP1,AKR7A2,MRPL15,VAMP8,ATP5F1D,ATP5MC2,ATP5MC3,ATP5PO,BAD,BAX,BCAT2,BCKDHA,NDUFA1,NDUFA2,NDUFA3,NDUFA6,NDUFA8,NDUFB2,NDUFB6,NDUFB7,NDUFB8,NDUFB10,NDUFV1,NDUFS6,NDUFS8,NDUFV3,RPL10A,NME2,NTHL1,OGG1,PCK2,RAB11B,TBRG4,GLYCTK,CHAT,UQCR10,PHB,SLC25A3,TXN2,GMPPB,MRM2,NDUFB11,TOMM7,COMT,NDUFAF3,POLRMT,PARS2,SLC25A10,…
Pubmed	27591049	SPATA2 Links CYLD to LUBAC, Activates CYLD, and Controls LUBAC Signaling.	Pubmed	1.936E-39	2.784E-34	1.211E-35	1.508E-34	114	559	MARS,MDH2,HIST1H4A,SLC25A5,ANXA2,MRPL15,CCAR2,EIF3B,EIF3F,EIF3I,ATP2A3,MYH9,RPL10A,BSG,H1FX,CAD,SERPINH1,PCBP1,PHB,SLC25A3,PLEC,COL1A2,RPL36,PSMA7,PSMB5,PSMB6,PSMC3,PSMD3,PSMD4,PTBP1,SPATA2,DCTN1,MVP,RAN,UPF1,ECM1,MRPS18A,MRPL4,SLC25A22,EEF1B2,EEF2,PDIA6,RPL3,RPL6,RPL7A,RPL8,RPL11,RPL15,RPL18,RPL27,RPL27A,RPL28,RPL31,RPL35A,SF3B4,RPL37A,RPLP1,RPLP2,MRPL12,RPS2,RPS3,RPS4X,RPS5,RPS8,RPS9,RPS10,RPS1…
Pubmed	26638075	A Dynamic Protein Interaction Landscape of the Human Centrosome-Cilium Interface.	Pubmed	3.025E-39	4.351E-34	1.813E-35	2.257E-34	226	1820	RHBDD2,MCM2,LRRC47,ADSL,AP2A1,MIF,MMP15,NOB1,CCDC61,ARF5,ARL2,CCDC124,ORMDL2,CCAR2,VAMP8,AUP1,CDS2,BCR,BANF1,NDUFV1,NDUFS8,SQSTM1,SLC5A6,WRAP73,SNU13,ZNF598,ANKRD52,NOTCH1,NOTCH2,CAD,CALR,CAMK2B,TRIM41,AIP,SERPINH1,CCNB1,PEBP1,HGS,PALM,CEP170B,RAB11B,ATP6V1F,CBARP,PFKL,SRPRB,CKB,CACTIN,AP2S1,LMF2,DDX54,NOC4L,PYCR2,TMCO1,EPN1,PLOD1,NENF,POLR2E,TP53I11,POR,GTPBP1,KANK2,AAR2,PPP4C,SEC24C,CSK,CSNK1D,…
Pubmed	29128334	A Map of Human Mitochondrial Protein Interactions Linked to Neurodegeneration Reveals New Mechanisms of Redox Homeostasis and NF-?B Signaling.	Pubmed	6.719E-38	9.663E-33	3.865E-34	4.813E-33	135	787	ACAA1,H2AFV,MARS,MCM2,MDH2,HIST1H2BE,HIST1H2BC,MIF,ALDOA,SLC25A5,ANXA2,ARHGDIA,CCDC124,CCAR2,EIF3B,EIF3F,EIF3I,ATP5PO,BAX,BANF1,NDUFS6,RPL10A,BSG,SQSTM1,EIF2B2,SNU13,AP1M1,H1FX,SERPINH1,TMED4,PAFAH1B3,PCK2,RCC1,CKB,SLC25A3,PLEC,PYCR2,DCTPP1,RPL36,POLR2E,POLR1C,CXCL14,TMED9,PRKCSH,MAP2K2,PSAP,QPCTL,MLEC,EIF4A3,PSMB6,PSMC3,PSMD3,PSMD4,DBN1,PTBP1,DDOST,PTMS,RANGAP1,ACOT8,SCAMP3,EEF1B2,EEF2,PDIA6,DAZ…
Pubmed	19056867	Large-scale proteomics and phosphoproteomics of urinary exosomes.	Pubmed	1.208E-37	1.737E-32	6.681E-34	8.320E-33	156	1017	ACY1,MDH2,MFGE8,MIF,AK1,ALDH2,ALDOA,MPST,ANXA2,DBNL,APOE,CPNE5,PDXK,AKR7A2,RHOB,RHOC,RHOG,SCRN2,ARHGDIA,ASL,GLIPR2,VAMP8,ATP6V1B2,MYH9,BCR,BLVRB,SQSTM1,AP1M1,SELENBP1,PGLYRP1,NT5E,CBR1,PEBP1,HGS,CD81,AP4M1,PCBP1,CHMP1A,ATP6V1F,PFKL,CKB,SLC25A3,SLC9A3R2,SLC9A3R1,GRHPR,CLIC1,PGLS,PLOD1,CNP,COMT,S100A16,MINK1,MXRA8,ATP6V1G1,CRYM,SOGA1,CSK,ACOT11,CST3,CSTB,PRKCD,CROCC,PSAP,PSMB5,PSMB6,PSMD3,CC2D1A,PH…
Pubmed	22268729	Proteomic identification of common SCF ubiquitin ligase FBXO6-interacting glycoproteins in three kinds of cells.	Pubmed	7.957E-37	1.144E-31	4.238E-33	5.278E-32	116	613	MARS,HIST1H4I,LRRC47,HIST1H4A,HIST1H4D,HIST1H4H,LTBP4,SLC25A5,NOB1,RHOG,EIF3B,EIF3F,AUP1,BSG,CAD,SERPINH1,PCBP1,PFKL,SRPRB,PHB,SLC25A3,LMF2,CLIC1,ECEL1,TMCO1,PLOD1,PLXNA1,COMT,SLC25A10,NDUFS7,PSAP,QPCTL,EIF4A3,PSMC3,PSMD3,PSMD4,TMEM214,DBN1,PTBP1,DDOST,PHGDH,SEMA4C,MRC2,TMEM231,CHPF,DNASE2,SCAMP3,SLC25A22,CNNM3,EEF1B2,PDIA6,TRIM28,DDX39A,ENO1,RPL6,RPL7A,RPL8,RPL18,RPL28,FAM234A,RPLP2,RPS3,RPS4X,R…
Pubmed	20877624	Genetic variants in nuclear-encoded mitochondrial genes influence AIDS progression.	Pubmed	4.898E-36	7.044E-31	2.516E-32	3.133E-31	145	926	CLPP,ACAA1,ACACB,ACADS,MARS,MDH2,COMTD1,ADSL,ALDH2,SLC25A29,MPST,AKR7A2,MRPL15,VAMP8,ATP5F1E,ATP5MC2,ATP5MC3,ATP5ME,ATP5PO,BAD,BAX,BCAT2,BCKDHA,NDUFA2,NDUFA3,NDUFA6,NDUFA8,NDUFB2,NDUFB6,NDUFB7,NDUFB10,NDUFV1,NDUFS6,NDUFS8,NDUFV3,RPL10A,NME2,NTHL1,OGG1,PCK2,RAB11B,TBRG4,CHAT,UQCR10,PHB,SLC25A3,TXN2,GMPPB,MRM2,TOMM7,COMT,COX5B,NDUFAF3,POLRMT,PARS2,SLC25A10,FITM2,PRODH,ABHD11,ROMO1,NDUFS7,AURKAIP1,S…
Pubmed	15226823	Genomic analysis of mouse retinal development.	Pubmed	6.214E-36	8.937E-31	3.082E-32	3.838E-31	148	961	ABCA2,MAZ,CYGB,FZD1,FZD8,RHPN1,MGAT1,IGSF9,ULK1,MNT,MPP2,PITPNM2,AMFR,SLC25A5,PDXK,PTOV1,LAMTOR4,RANGRF,CCAR2,SAMD14,ATP6V1B2,FGFRL1,CCND1,CDK5R1,LDB1,NNAT,TMEM86A,NOTCH1,DDR1,CCND3,HGS,CD81,PBX2,DPM3,ADGRG1,TAOK2,NRXN2,ANAPC2,KCTD15,PLEC,DDIT4,MPDU1,TP53I11,ZNF385A,SLC32A1,CARTPT,NCOR2,CRYM,PPP4C,RASL10B,CTNNB1,CROCC,UBALD1,TMEM94,CASZ1,UCKL1,KBTBD11,DLG4,HSDL1,FAM57B,DUSP8,DVL1,DVL2,RFX1,SEZ6L2…
Pubmed	24952961	A high-resolution spatiotemporal atlas of gene expression of the developing mouse brain.	Pubmed	2.110E-35	3.035E-30	1.012E-31	1.260E-30	219	1835	MAFG,ABCA2,MAZ,ACVR2B,LMTK3,MDH2,ADCYAP1R1,FZD1,FZD8,ADORA2A,UNC5A,MFGE8,ADRA2A,ADRA2C,AES,AKT1,FOXO4,ALDH2,MNT,DOC2B,ANXA2,ENC1,KLF15,APLP1,APOE,ARF6,SPTBN4,JRK,ATF4,MDGA1,NPAS4,MYH9,AXL,FXYD6,FGFRL1,CDK5R1,LDB1,PYGO2,NFE2L1,NFKBIA,CACNA1H,C4B,NNAT,BAIAP3,NOS1,NOS3,NOTCH1,NOTCH2,NOTCH4,CCN3,DDR1,HAP1,NTS,CLDN11,OXTR,PBX2,PCDH1,PDYN,ADGRG1,CHAT,ABT1,NLE1,BAMBI,NTN1,ECEL1,PLXNA1,CNP,PLXNB1,PNOC,NE…
Pubmed	15231747	A protein interaction framework for human mRNA degradation.	Pubmed	4.630E-35	6.659E-30	2.148E-31	2.675E-30	84	347	MIF4GD,COMTD1,MIF,ALDOA,NOB1,NTMT1,GADD45GIP1,PDLIM4,FHOD1,LSM2,EIF3I,ATP5F1D,ATP5MC2,NDUFB10,CALR,CD81,PEX10,CRELD1,GRHPR,TSEN34,LSM4,EXOSC4,COMT,NOP53,COX5B,POLD2,MPDU1,NDUFAF3,POLR2L,CYBA,PSMB5,PSMB8,TMEM214,CHPF,DNASE2,FERMT3,DXO,DPAGT1,E4F1,UPF1,MRPL4,ANGPTL6,EEF2,SERF2,ENO1,RPL8,ESRRA,KATNB1,RPS15,RPS20,RNF187,FBLN2,EIF3L,SDHB,PTGES2,CIB1,NAGK,AGPAT1,FTL,SNRPD2,LSM7,MINDY1,RUVBL2,ZGPAT,RRP7…
Pubmed	23246001	SGTA recognizes a noncanonical ubiquitin-like domain in the Bag6-Ubl4A-Trc35 complex to promote endoplasmic reticulum-associated degradation.	Pubmed	3.444E-34	4.953E-29	1.548E-30	1.928E-29	69	239	AMFR,SLC25A5,KHSRP,ATP5PO,AUP1,RPL10A,PCBP1,SRPRB,PHB,SLC25A3,RPL36,TMED9,EEF2,RPL3,RPL6,RPL7A,RPL8,RPL11,RPL15,RPL18,RPL27,RPL27A,RPL28,RPL31,RPL36AL,RPL37A,RPLP0,RPLP1,RPLP2,RPS2,RPS3,RPS4X,RPS5,RPS8,RPS9,RPS10,RPS12,RPS15A,RPS16,RPS20,RPS21,RPS26,RPS27A,TUBA1B,TUBB4B,RACK1,CDIPT,SGTA,TUBB,RNF126,GET4,SNRNP70,SNRPD2,STX4,SURF4,LMAN2,TMED1,TUFM,UBC,UBE2G2,UQCRC1,HSPA1A,HSPA1B,HSPA5,HSPB1,DIABLO,…
Pubmed	8722009	Structure and evolution of mammalian ribosomal proteins.	Pubmed	1.649E-32	2.371E-27	7.088E-29	8.827E-28	41	80	RPL10A,RPL36,RPL3,RPL6,RPL7A,RPL8,RPL11,RPL15,RPL18,RPL27,RPL27A,RPL28,RPL31,RPL35A,RPL36AL,RPL37,RPL37A,RPL39,RPL41,RPLP0,RPLP1,RPLP2,RPS2,RPS3,RPS4X,RPS5,RPS8,RPS9,RPS10,RPS12,RPS15,RPS15A,RPS16,RPS20,RPS21,RPS23,RPS26,RPS27A,RPS28,RPS29,FAU
Pubmed	22681889	The mRNA-bound proteome and its global occupancy profile on protein-coding transcripts.	Pubmed	1.676E-32	2.410E-27	7.088E-29	8.827E-28	128	806	MAZ,MDH2,HIST1H4I,LRRC47,HIST1H4A,HIST1H4D,HIST1H4F,HIST1H4C,HIST1H4H,ALDOA,KHSRP,MRPL15,CCAR2,LSM2,SRSF9,EDF1,MYH9,NDUFV3,RPL10A,SNU13,ZNF598,H1FX,RRP9,PCBP1,TBRG4,ABT1,CACTIN,DDX54,LSM4,NOP53,NOL12,POLRMT,ZNF385A,SYF2,DHX34,CCDC9,EIF4A3,PTBP1,NOP9,RAN,GRWD1,SAMD4B,UPF1,MRPL4,MRPS7,EEF2,DAZAP1,TRIM28,MRTO4,DDX39A,IMP3,RPL3,RPL7A,RPL8,RPL11,RPL15,RPL27,RPL27A,RPL35A,SF3B4,RPL37A,RPLP0,MRPS12,FBL,…
Pubmed	26831064	CHK2-BRCA1 tumor-suppressor axis restrains oncogenic Aurora-A kinase to ensure proper mitotic microtubule assembly.	Pubmed	2.696E-32	3.877E-27	1.108E-28	1.379E-27	97	494	MARS,MCM2,MDH2,ALDOA,APEH,KHSRP,CCAR2,EIF3B,EIF3I,MYH9,RPL10A,CAD,SERPINH1,PCBP1,PFKL,CLIC1,PLEC,CNN2,RPL36,SEC24C,PRKCSH,CTNNB1,PSMA7,PSMB5,PSMC3,PSMD3,PSMD4,PTBP1,DCTN1,PHGDH,MVP,RAN,RANGAP1,UPF1,EEF1B2,EEF2,MYH14,TRIM28,ENO1,RPL3,RPL6,RPL7A,RPL8,RPL11,RPL15,RPL18,RPL27,RPL27A,RPL28,RPL31,RPL37A,RPLP1,RPLP2,FBL,RPS2,RPS3,RPS5,RPS8,RPS9,RPS12,RPS15A,RPS16,RPS23,TUBB4B,FASN,FAU,RACK1,EIF3L,FKBP4,…
Pubmed	15189156	The molecular mechanics of eukaryotic translation.	Pubmed	7.059E-32	1.015E-26	2.820E-28	3.512E-27	42	87	RPL10A,RPL36,EEF1B2,EEF2,RPL3,RPL7A,RPL8,RPL11,RPL15,RPL18,RPL27,RPL27A,RPL28,RPL31,RPL35A,RPL37,RPL37A,RPL39,RPL41,RPLP0,RPLP1,RPLP2,RPS2,RPS3,RPS4X,RPS5,RPS8,RPS9,RPS10,RPS12,RPS15,RPS15A,RPS16,RPS20,RPS21,RPS23,RPS26,RPS27A,RPS28,RPS29,FAU,RPSA
Pubmed	27432908	Defining the Protein-Protein Interaction Network of the Human Protein Tyrosine Phosphatase Family.	Pubmed	9.123E-32	1.312E-26	3.546E-28	4.416E-27	138	931	WDR18,ADSL,AP2A2,CASKIN1,AKT1,DBNL,GADD45GIP1,ARF5,AKR7A2,MRPL15,NUDT1,SRSF9,ATP5PO,AUP1,BCKDHA,BCR,NDUFB10,NDUFS8,BYSL,CALR,CAPNS1,AIP,CBS,CCNB1,SRPRB,PHB,TBCB,TSEN34,PSMC3IP,TMCO1,DCTPP1,GMPPB,EXOSC4,RPL36,TNPO2,POLR2E,NDUFAF3,POLR1C,AAR2,PPP4C,PPP5C,CSK,CSTB,CTBP1,PRKCSH,QPCTL,SNX17,TMEM214,KEAP1,DCTN1,DFFA,PTPN14,CANT1,PTPRN,PIH1D1,RAC3,SCO2,ACOT8,PDCD6,DUSP4,DUSP8,MRPS16,SCAMP3,MRPL4,CNNM3,M…
Pubmed	25147182	Quantitative Lys-?-Gly-Gly (diGly) proteomics coupled with inducible RNAi reveals ubiquitin-mediated proteolysis of DNA damage-inducible transcript 4 (DDIT4) by the E3 ligase HUWE1.	Pubmed	1.930E-31	2.776E-26	7.306E-28	9.099E-27	85	395	ACACB,MARS,MCM2,MDH2,ALDOA,SLC25A5,KHSRP,EIF3F,EIF3I,MYH9,RPL10A,CALR,CAPNS1,PCBP1,PHB,CKB,SLC25A3,DDIT4,POLR1C,AAR2,CTNNB1,EIF4A3,PSMA7,PSMB5,PSMC3,PSMD3,PTBP1,DDOST,PHGDH,ECH1,EEF1B2,EEF2,PDIA6,TRIM28,KCTD10,RPA2,ENO1,RPL3,RPL6,RPL7A,RPL8,RPL15,RPL18,RPL27,RPL27A,RPL28,RPLP0,FBL,RPS3,RPS4X,RPS8,RPS9,RPS10,RPS15A,RPS16,RPS20,RPS23,TUBB4B,FARSA,FASN,RACK1,HAX1,SGTA,TUBB,SHMT2,CCT7,PPP6R1,AHSA1,GE…
Pubmed	15635413	Nucleolar proteome dynamics.	Pubmed	6.099E-31	8.771E-26	2.249E-27	2.801E-26	87	419	WDR18,MCM2,MDH2,ANXA2,MYH9,BANF1,RPL10A,SNU13,H1FX,SERPINH1,CCNB1,RRP9,PCBP1,RCC1,ABT1,CHD3,DDX54,PLEC,EXOSC4,RPL36,S100A16,NOP53,POLR2E,POLR1C,EIF4A3,PSMA7,PTBP1,NOP9,RAN,GRWD1,PDCD6,RFC2,ARPC1B,NOSIP,EEF2,TRIM28,DDX39A,IMP3,RPL3,RPL6,RPL7A,RPL8,RPL15,RPL18,RPL27,RPL28,RPL35A,RPLP2,MRPL12,FBL,RPS2,RPS5,RPS8,RPS9,RPS10,RPS12,RPS16,RPS23,NPM3,TUBB4B,FAU,FEN1,WDR89,DDX41,MYBBP1A,POLDIP3,ARPC1A,SHMT…
Pubmed	27626380	High-throughput discovery of novel developmental phenotypes.	Pubmed	3.947E-30	5.677E-25	1.419E-26	1.767E-25	192	1634	ACVR2B,MBD6,MDK,ELFN2,ADCYAP1R1,RHPN1,ADRA2A,ADSL,AP2A2,CASKIN2,CASKIN1,MAP3K10,MMP15,RSPH9,PLIN4,CBX4,CPNE5,BLOC1S2,ARF3,PNCK,ATP1A3,ATP5MC2,ATP6V1B2,PXDC1,FADD,NDUFA8,BLVRB,EIF2B4,NME2,NOTCH4,H1FX,SELENBP1,HIP1R,WFDC1,CCNB1,OXTR,DPP9,FURIN,AP4M1,CDC34,ARHGAP33,CDKN1A,PDE1B,SLC25A3,MSANTD1,KCTD15,BAMBI,PLCB2,SNX15,PLOD1,COL1A2,BRMS1,COL6A2,COL9A2,SPEF1,COMT,CRELD2,ATF6B,CRYM,GTPBP2,PTPA,SYNE3,CS…
Pubmed	28671696	Spatiotemporal profile of postsynaptic interactomes integrates components of complex brain disorders.	Pubmed	9.887E-30	1.422E-24	3.468E-26	4.319E-25	133	916	WDR18,LMTK3,MDK,SLC12A5,AP2A1,AP2A2,CASKIN1,NLGN2,BEGAIN,MPP2,AMPD2,LRFN1,GIT1,HCN3,PPFIA3,MBD3,ARF3,KHSRP,ARF5,SPTBN4,RHOC,CCDC124,DCHS1,CCAR2,MYH9,HCN2,BCR,SYNGAP1,CCDC13,LDB1,NOS1,CACNB1,CAD,CAMK2B,PCBP1,PCDH8,CEP170B,PDE1B,NUMBL,TAOK2,AP1S1,CAMKV,HOMER3,CNP,MAPK8IP1,MINK1,KANK2,ATF6B,NCOR2,SEC24C,SOGA1,NCAN,TMED9,CTBP1,CTNNB1,LZTS3,DAPK3,KEAP1,DBN1,DCTN1,PEX5,DLG4,LAMTOR1,FERMT3,RAN,RANGAP1,D…
Pubmed	15057824	The DNA sequence and biology of human chromosome 19.	Pubmed	3.176E-29	4.567E-24	1.087E-25	1.354E-24	69	283	MATK,WDR18,AP2A1,AES,RANBP3,CCDC61,MBD3,ATP5F1D,HCN2,BSG,DIRAS1,PGLYRP1,CALR,CAPNS1,OAZ1,PAFAH1B3,DYRK1B,PALM,ARHGAP33,CBARP,TBCB,CACTIN,PIK3R2,HOMER3,TRAPPC6A,DDX49,POLR2E,POLR2I,POLRMT,PPP5C,CSNK1G2,NCAN,PTBP1,DMWD,DNASE2,UPF1,FBL,YJEFN3,RYR1,HMG20B,FZR1,FARSA,SGTA,BTBD2,SIRT6,SNRPD2,LSM7,MAST3,GAMT,CIC,MYDGF,GNA11,UQCR11,GNG7,TMED1,TCF3,MKNK2,VSTM2B,LMNB2,THOP1,COPE,FKBP8,USF2,XRCC1,ZNF180,NCL…
Pubmed	21516116	Next-generation sequencing to generate interactome datasets.	Pubmed	6.215E-29	8.939E-24	2.079E-25	2.589E-24	151	1147	KCTD13,ACY1,RHPN1,MBD3,ARL2,MRPL15,SSNA1,ATF4,LSM2,ATP5PO,CDS2,FXYD6,CCND1,NDUFB6,CDK5R1,SQSTM1,NFKBIB,EIF2B2,BYSL,AP1M1,TRIM41,CBS,CCND3,PAFAH1B3,CDKN1A,CDKN2D,DDA1,PIK3R2,SNX15,HOMER3,NECAB2,TNPO2,COX5B,NOL12,POLR2L,ATP6V1G1,KANK2,CRYBB1,RIN1,FOXP4,TRAF4,SLC25A10,DYNLL2,CTBP1,MAPK7,CYB561,PSMB10,PSMD3,FAM110A,KEAP1,PTPRN,PARD6A,HSPB8,PDCD6,SLC35C2,DVL2,FIS1,DPP3,TSSC4,RFX2,VPS37B,CTDSP2,RING1,C…
Pubmed	23443559	LGALS3BP regulates centriole biogenesis and centrosome hypertrophy in cancer cells.	Pubmed	1.126E-28	1.619E-23	3.680E-25	4.583E-24	106	639	H2AFV,HIST1H4H,PPFIA3,MBD3,CCND1,RPL10A,H1FX,CAD,CAPNS1,CCNB1,CCND3,PCBP1,CDKN1A,DDA1,ANAPC2,DDX54,NOC4L,NDUFAF3,ZNF385A,NCOR2,TBKBP1,EIF4A3,PSMB5,SCO2,GRWD1,HDAC5,PDCD6,TPGS1,MRPS16,RFC2,MRPS7,TRIM28,ARMC5,RPL3,RPL6,RPL7A,RPL8,RPL11,RPL15,RPL18,RPL27,RPL31,RPL37A,RPLP0,RPLP2,FBL,RPS2,RPS3,RPS4X,RPS5,RPS8,RPS9,RPS10,RPS12,RPS15,RPS15A,RPS16,RPS20,RPS23,RPS26,TUBA1B,TUBB4B,FAU,SBF1,FGFR1,HAX1,DDX4…
Pubmed	28330616	Systematic Analysis of Human Protein Phosphatase Interactions and Dynamics.	Pubmed	2.436E-28	3.504E-23	7.771E-25	9.678E-24	99	572	ACACB,MDH2,MCRIP1,AMFR,PPFIA3,KHSRP,CCAR2,EIF3B,ATP5PO,BCKDHA,RPL10A,NME2,ANKRD52,CAD,CALR,PEBP1,PFKL,PHB,CKB,SLC25A3,POLR2E,PPP1R8,PPP4C,PPP5C,CSK,GALNT9,PRKCSH,SF3B5,PPP1R12C,INTS1,PSMC3,PSMD3,PSMD4,DBN1,PTPRF,INTS11,PPP1R37,PIH1D1,SCO2,GRWD1,ECH1,CNNM3,PDIA6,MAP1S,DDX39A,RPL3,RPL8,RPL27,RPL28,SF3B4,RPLP2,RPS26,THEM6,TUBB4B,VPS52,RACK1,EIF3L,HAX1,PFDN6,FKBP4,FLII,MYBBP1A,CHERP,HYOU1,CCDC85C,SHM…
Pubmed	9582194	A map of 75 human ribosomal protein genes.	Pubmed	2.486E-28	3.575E-23	7.771E-25	9.678E-24	35	67	RPL10A,RPL3,RPL6,RPL7A,RPL8,RPL11,RPL15,RPL18,RPL27A,RPL28,RPL31,RPL35A,RPL37,RPL41,RPLP0,RPS2,RPS3,RPS4X,RPS5,RPS8,RPS9,RPS10,RPS12,RPS15,RPS15A,RPS16,RPS20,RPS21,RPS23,RPS26,RPS27A,RPS28,RPS29,FAU,RPSA
Pubmed	17081983	Global, in vivo, and site-specific phosphorylation dynamics in signaling networks.	Pubmed	3.206E-28	4.611E-23	9.701E-25	1.208E-23	181	1546	ABCA2,MCM2,HIST1H4I,ELFN2,LRRC47,PRR12,ADRA2A,CASKIN2,MLLT1,AKT1,ULK1,ALDOA,BEGAIN,AMPD2,VPS18,GIT1,ANXA2,RANBP3,NOB1,DBNL,CBX4,CCDC61,KHSRP,SPTBN4,CCAR2,IRS2,EIF3B,SRSF9,MYH9,CDS2,BCKDHA,BCR,BSG,SQSTM1,BYSL,CACNA1H,FMNL1,NOTCH2,H1FX,CACNB1,CAD,PEBP1,RRP9,PALM,PCBP1,NUMBL,PFAS,RCC1,CBARP,CHD3,PHB,TFPT,SLC9A3R1,DDX54,PLCB3,PLEC,TMCO1,EPN1,RETREG2,NOL12,MINK1,GTPBP1,KANK2,PITPNM1,NCOR2,CSNK1D,CALY,…
Pubmed	21423176	Analysis of the myosin-II-responsive focal adhesion proteome reveals a role for ?-Pix in negative regulation of focal adhesion maturation.	Pubmed	3.238E-28	4.657E-23	9.701E-25	1.208E-23	68	285	FZD1,MMP14,GIT1,ARF6,RHOB,RHOG,RPL10A,BSG,CALR,CD81,CD151,SLC9A3R2,PLEC,CNN2,CSPG4,CSRP2,CTNNB1,TES,MRC2,ARPC1B,EPHA2,RPL3,RPL6,RPL7A,RPL8,RPL18,RPL27,RPL31,RPL37A,RPLP0,RPLP1,RPLP2,RPS2,RPS3,RPS4X,RPS5,RPS8,RPS9,RPS10,RPS15,RPS16,RPS29,ITGA11,HYOU1,LIMS2,SLC9A1,FZD2,TRIOBP,TNS2,GSN,CDC42EP1,TGM2,TLN1,TSPAN4,HMGA1,HSPA1A,HSPA1B,HSPA5,VASP,HSPB1,VIM,HSPG2,YWHAG,ITGA5,ITGB5,JUP,SPRY4,LRP1
Pubmed	14651853	Integrated analysis of protein composition, tissue diversity, and gene regulation in mouse mitochondria.	Pubmed	3.374E-28	4.852E-23	9.902E-25	1.233E-23	91	494	CLPP,ACADS,ACADVL,MDH2,AK1,ALDH2,MPST,SLC25A5,AKR7A2,MRPL15,ATP5PO,BAX,BCAT2,BCKDHA,NDUFA1,NDUFA2,NDUFA6,NDUFA8,NDUFB2,NDUFB6,NDUFB7,NDUFB8,NDUFB10,NDUFV1,NDUFS8,NDUFV3,NME2,NTHL1,OGG1,FIBP,PCK2,UQCR10,PHB,CKB,SLC25A3,TXN2,NDUFB11,POLRMT,SLC25A10,CYBA,ROMO1,NDUFS7,PSAP,DBI,SARDH,ACOT8,MRPS16,FIS1,ECH1,SLC25A22,MRPS7,ENDOG,GLRX5,MRPS12,MRPL27,HAX1,SDHB,SDHC,FPGS,SHMT2,ATP5MG,GRPEL1,UQCRQ,SOD1,GAD1…
Pubmed	23398456	The P-body component USP52/PAN2 is a novel regulator of HIF1A mRNA stability.	Pubmed	3.790E-28	5.451E-23	1.090E-24	1.358E-23	73	328	AP2A2,HIST1H4A,EIF3B,EIF3I,ATP6V1B2,MYH9,MYL6,RPL10A,SQSTM1,PCBP1,PLEC,CNN2,COL1A2,RPL36,DBN1,RAN,ARPC1B,MYH14,RPA2,RPL3,RPL6,RPL7A,RPL8,RPL11,RPL15,RPL18,RPL27,RPL27A,RPL28,RPL31,RPL35A,RPL37,RPL37A,RPLP0,RPLP2,FBL,RPS2,RPS3,RPS4X,RPS5,RPS8,RPS9,RPS10,RPS12,RPS15A,RPS16,RPS23,RPS26,RPS27A,TUBA1B,TUBB4B,FARSA,FLII,POLDIP3,TUBB,CCT7,TIMM50,SNRNP70,SNRPD2,RUVBL2,SMPDL3B,GNAI2,LMNB2,HBB,CMBL,HMGA1,T…
Pubmed	16713569	A protein-protein interaction network for human inherited ataxias and disorders of Purkinje cell degeneration.	Pubmed	4.900E-28	7.048E-23	1.382E-24	1.721E-23	102	608	MIF4GD,MBD6,MDK,AES,NYNRIN,MLLT6,C1QTNF1,KIF17,LTBP4,PDZD4,BEGAIN,PPFIA4,ARF3,ATP1A3,LDB1,BYSL,NOTCH1,CACNB1,HAP1,OAZ1,HGS,ENTPD6,PCBP1,PCDH8,NUMBL,PFKL,TBCB,SCAF1,PYCR2,DDIT4,NECAB2,UBQLN2,PLEKHG4,CRIP2,NSMF,VSTM2L,CST3,CTBP1,PSAP,PSMC3,PTBP1,PTPRN,DMPK,DVL2,ECM1,MEGF6,MYH14,SERF2,EGFL7,ENO1,KLHL26,NUDT18,CXXC1,FBLN1,FBLN2,BAIAP2,MIEF2,PUF60,MON1A,DRAP1,MAP7D1,TRIM32,SLIT1,SYVN1,CYB5R1,CCDC107,Z…
Pubmed	19615732	Defining the human deubiquitinating enzyme interaction landscape.	Pubmed	8.223E-28	1.183E-22	2.274E-24	2.832E-23	137	1005	KCTD13,MAZ,WDR18,MCM2,TRRAP,BAP1,LRRC47,ADSL,ALDOA,MPST,BLOC1S2,SSNA1,EIF3B,EIF3F,LSM2,EIF3I,MYH9,ATP5PO,MYL6,ADGRB1,BCR,BSG,SQSTM1,WRAP73,ANKRD52,SELENBP1,TAF1C,CBR3,CDC34,DEDD,PFAS,PFKL,SRPRB,PHB,CKB,SLC9A3R2,TFPT,SLC9A3R1,DDA1,LSM4,PLEC,NOP53,POLR2E,POLR1C,POLR2I,PPP5C,DYNLL2,KDM4A,LRRC14,PSMB5,PSMB6,PSMC3,PSMD3,PSMD4,KEAP1,SPATA2,DDOST,TMEM160,DMWD,RANGAP1,DPP3,IPO4,RFC2,EXOC8,KIF7,RNH1,KCTD1…
Pubmed	21044950	Genome-wide YFP fluorescence complementation screen identifies new regulators for telomere signaling in human cells.	Pubmed	1.835E-26	2.640E-21	4.980E-23	6.202E-22	71	330	MCM2,ACY1,ADPRH,AK1,AKT1,ALDOA,AMPD2,ANXA2,DBNL,SCRN2,ARHGDIA,MT3,PAFAH1B3,PALM,PDE1B,CKB,PGLS,POLD1,TNPO2,NOL12,CRYBB1,CRYM,CTBP1,REM2,CCDC9,KEAP1,DBN1,CCM2,RNF10,PEX5,FERMT3,DPP3,TSSC4,TBC1D10A,MRTO4,DDX39A,ENO2,NUDT18,STUB1,TUBB4B,FEN1,FES,ISYNA1,NUDT14,TUBB,HEXIM1,GAS2L1,RGS14,NUDC,GAMT,WDR4,NCDN,TAGLN,HDGFL2,PDLIM2,OGFR,COTL1,PTPN5,TKT,HMGN1,TUBB2A,UCHL1,FKBP8,HSPA1A,WARS,WFS1,JSRP1,YWHAG,RG…
Pubmed	26673895	A deep proteomics perspective on CRM1-mediated nuclear export and nucleocytoplasmic partitioning.	Pubmed	2.021E-26	2.907E-21	5.384E-23	6.705E-22	137	1038	AP2A1,DOCK6,BEGAIN,PITPNM2,NOB1,CCDC124,CCAR2,IRS2,BCR,RPL10A,SQSTM1,NFKBIA,NFKBIB,EIF2B4,EIF2B2,WRAP73,BYSL,AP1M1,ANKRD52,CCNB1,AP4M1,NUMBL,TFPT,AP1S1,LSM4,EPN1,POLD1,POLD2,POLR2E,POLR2I,POLR2K,KANK2,SOX13,PPP4C,SEC24C,KLHDC3,CSNK1D,CTNNB1,MAPK7,MAP2K2,SNX17,CC2D1A,DAXX,KEAP1,SPATA2,PHGDH,RUSC2,RNF10,PEX5,DMWD,PIH1D1,HSPB8,RAP1GAP,ROGDI,GRWD1,HDAC5,PDCD6,SAMD4B,DVL1,DVL2,PLEKHJ1,RELB,UPF1,VPS37B…
Pubmed	25315684	Repression of rRNA transcription by PARIS contributes to Parkinson's disease.	Pubmed	2.852E-26	4.101E-21	7.457E-23	9.286E-22	64	272	MARS,LRRC47,AP2A1,SLC25A5,DHX37,EIF3B,EIF3I,ATP5PO,RPL10A,BYSL,H1FX,CAD,PFKL,PHB,SLC25A3,DDX54,RPL36,POLD1,POLRMT,PSMD3,EEF2,MYH14,TRIM28,MRTO4,RPL3,RPL6,RPL7A,RPL8,RPL18,RPL27A,RPL28,RPLP0,RPLP2,FBL,RPS2,RPS9,RPS12,RPS15,RPS15A,RPS16,RPS23,FARSA,FASN,RACK1,EIF3L,MYBBP1A,PUF60,POLDIP3,AHSA1,TBL3,SLC25A1,TIMM50,GALK1,UNC45A,RRP12,GCN1,HIST1H2BB,TUBB2A,TUFM,MRPL14,NOL6,COQ8A,ZNF212,RPSA
Pubmed	11125038	Database resources of the National Center for Biotechnology Information.	Pubmed	5.322E-26	7.653E-21	1.367E-22	1.702E-21	181	1614	KCTD13,COMTD1,CASKIN1,DISP3,CCDC97,PITPNM2,CNIH2,BLOC1S2,ARHGDIA,ARHGDIG,FLCN,LRRC61,BCL9L,TPRA1,CARMIL3,PXDC1,RDM1,NDUFA2,EIF2B4,EIF2B2,KLHDC7A,ZNF598,TMEM86A,CA12,NTS,GRASP,DPP9,RRP9,GLYCTK,SRPRB,SNX8,ZFYVE21,TSEN34,NOC4L,EPN1,TRAPPC6A,S100A16,PLEKHG4,MINK1,POLR1C,POLR2K,POLRMT,RIN1,TBC1D10B,ZNF526,NSMF,SLC25A10,CCDC9,SZRD1,PPP1R12C,GPRIN2,TBKBP1,QPCTL,MLEC,LRFN3,INTS1,CC2D1A,DAXX,TMEM214,FAM11…
Pubmed	11790298	Directed proteomic analysis of the human nucleolus.	Pubmed	1.948E-25	2.802E-20	4.915E-22	6.121E-21	55	208	WDR18,ANXA2,SRSF9,RPL10A,SNU13,RRP9,PCBP1,ABT1,PHB,DDX54,EXOSC4,DDX49,NOP53,POLR2E,POLR1C,MRTO4,DDX39A,IMP3,RPL3,RPL6,RPL7A,RPL8,RPL11,RPL15,RPL18,RPL27,RPL27A,RPL31,RPLP0,FBL,RPS4X,RPS5,RPS8,RPS9,RPS12,RPS16,NPM3,EMG1,MYBBP1A,NHP2,TBL3,RRP12,PRPF19,RRP7A,BOP1,GCN1,TPT1,U2AF2,TUFM,HSPA1A,HSPA5,NOL6,DDX39B,RPSA,LMNA
Pubmed	27173435	An organelle-specific protein landscape identifies novel diseases and molecular mechanisms.	Pubmed	3.208E-25	4.614E-20	7.875E-22	9.807E-21	157	1321	RHBDD2,MCM2,LRRC47,AP2A1,AP2A2,SLC25A29,RSPH9,AMPD2,LRFN1,GIT1,BLOC1S2,PTOV1,ARHGDIA,ARL2,SSNA1,CCAR2,TIMM29,ATP5F1E,ATP5ME,ATP5PO,MYL6,BAD,BCKDHA,NDUFA3,BCR,PIP4P1,EIF2B4,NFKBIL1,EIF2B2,CALR,CAMK2B,CAPNS1,CBS,TMED4,NANS,PCK2,NUMBL,PHB,SLC9A3R2,TFPT,AP2S1,SLC9A3R1,DDA1,LSM4,PLEC,DCTPP1,EXOSC4,CNP,COMT,POLD1,POLR2E,NDUFAF3,AAR2,PPP1R8,RIN1,DYNLL2,CYHR1,IPO13,CTBP1,CAVIN1,CTNNB1,GGA1,ROMO1,TBKBP1,M…
Pubmed	23533145	In-depth proteomic analyses of exosomes isolated from expressed prostatic secretions in urine.	Pubmed	3.230E-25	4.646E-20	7.875E-22	9.807E-21	137	1068	H2AFV,ACY1,MDH2,HIST1H4I,MGAT1,HIST1H4A,HIST1H4D,HIST1H4F,HIST1H4C,HIST1H4H,MIF,ALAD,ALDOA,MPST,ANXA2,APEH,APOE,CPNE5,ARF3,ARF5,AKR7A2,ARF6,SPTBN4,RHOG,ARHGDIA,GLIPR2,ATP6V1B2,MYH9,MYL6,AXL,C4B,NME2,SELENBP1,PGLYRP1,NT5E,CTDSP1,CBR1,NANS,PEBP1,CD81,PCBP1,RAB11B,ADGRG1,CKB,SLC9A3R2,SLC9A3R1,GRHPR,CLIC1,PGLS,CNP,COMT,MXRA8,CRYM,PTPA,CSPG4,CST3,CSTB,PSAP,PSMA7,CC2D1A,DBI,PHGDH,CHTF8,CANT1,PYGB,QDPR,…
Pubmed	20360068	Systematic analysis of human protein complexes identifies chromosome segregation proteins.	Pubmed	1.640E-24	2.359E-19	3.932E-21	4.897E-20	142	1149	MAFG,WDR18,BAP1,AP2A1,CCDC97,BEGAIN,CCDC12,ARF3,ARL2,CCAR2,EIF3B,EIF3F,EIF3I,BSG,SQSTM1,WRAP73,SNU13,CALR,OGG1,TMED4,CCNB1,RRP9,PAFAH1B3,PCBP1,CEP170B,LRWD1,PHB,DDA1,ANAPC2,TSEN34,LSM4,PLOD1,HOMER3,DDX49,RETREG2,SYF2,KANK2,AAR2,PPP1R8,SOGA1,CSK,DYNLL2,CAVIN1,PRKCSH,CCDC9,SF3B5,PPP1R12C,TES,EIF4A3,FAM110A,DCTN1,PHGDH,PTMS,PARD6A,RAN,RANGAP1,TSSC4,MRPS7,PDIA6,MAP1S,TRIM28,KCTD10,RNF41,MRTO4,DDX39A,…
Pubmed	27503909	Gsk3? and Tomm20 are substrates of the SCFFbxo7/PARK15 ubiquitin ligase associated with Parkinson's disease.	Pubmed	2.362E-24	3.397E-19	5.568E-21	6.934E-20	82	463	ASPHD1,H2AFV,WDR18,MCM2,ACVR2B,MDK,SLC25A5,GADD45GIP1,GLIPR2,CAD,NANS,PCBP1,RCC1,SLC25A3,PIM1,ZFYVE21,PNOC,S100A16,POLR2K,PIEZO1,PSMA7,PSMB5,PSMB6,PSMD3,PHGDH,ACOT8,RET,TMEM120A,RPL6,RPL11,EPHB4,SPRY2,RPL37A,FBL,RPS2,RPS3,RPS12,MRPL27,RPS15A,RPS16,RPS20,RPS26,HMG20B,TUBB4B,FARSA,FASN,RACK1,FGFR1,AMOTL2,ATF5,PHLDA1,PUF60,SHMT2,NUDT16L1,DRAP1,GET4,SLC25A1,SNRPA,RUVBL2,MED22,PRRC2B,PIM2,JADE2,GRK6,S…
Pubmed	26549023	The scaffold protein KSR1, a novel therapeutic target for the treatment of Merlin-deficient tumors.	Pubmed	3.916E-24	5.632E-19	9.084E-21	1.131E-19	70	350	LRRC47,MPP2,SLC25A5,LEMD2,EIF3F,MYL6,H1FX,CAD,CBS,CHMP1A,PHB,SLC25A3,PYCR2,GTPBP1,MAP2K2,PSMB5,PSMD3,MVP,PDCD6,IPO4,NOSIP,SLC25A22,TRIM28,RPA2,RPL3,RPL7A,RPL8,RPL15,RPL18,RPL27,RPL27A,RPL28,RPL31,SF3B4,STUB1,RPS2,RPS3,RPS4X,RPS5,RPS8,RPS9,RPS10,RPS15A,RPS16,RPS20,TUBB4B,FARSA,RACK1,EIF3L,FEN1,AMOTL2,FKBP4,SEC13,MYBBP1A,TUBB,CCT7,GRPEL1,SLC25A1,RUVBL2,RCC2,PRPF19,GRN,CDC37,DNPEP,AMOTL1,HSPA5,XRCC1…
Pubmed	7821789	Construction of a human full-length cDNA bank.	Pubmed	6.284E-24	9.037E-19	1.434E-20	1.786E-19	39	108	ALDOA,ANXA2,MT2A,ATP5MC2,BSG,NME2,SLC25A3,CNP,EEF1B2,ENO1,RPL3,RPL6,RPL11,RPL18,RPL27,RPL28,RPL31,RPL35A,RPL37A,RPL39,RPL41,RPLP0,RPLP1,RPLP2,RPS3,RPS5,RPS12,RPS16,RPS20,RPS21,RPS23,FAU,RACK1,FTH1,SPARC,GSTP1,TPT1,ID3,RPSA
Pubmed	15146197	Transcriptome characterization elucidates signaling networks that control human ES cell growth and differentiation.	Pubmed	7.001E-24	1.007E-18	1.573E-20	1.959E-19	137	1103	MDK,ADORA2A,MGAT1,AKT1,MNT,PSMG4,AOC2,NDST2,NTMT1,CCDC12,FUOM,BLOC1S2,ARF5,RHOC,ARL2,RANGRF,FHOD1,ATOX1,SAMD14,MYL6,NDUFS6,SYNGAP1,PYGO2,NNAT,NME2,NOTCH1,DDR1,AP5B1,PALM,CEP170B,TAOK2,CACTIN,SLC9A3R1,PIK3CD,PEX16,TSEN34,KCTD15,TMCO1,HOMER3,TRAPPC6A,COL6A2,DDIT4,KANK2,CRIP2,NCOR2,GTPBP2,NSMF,KLHDC3,NCAN,DYNLL2,KDM4A,DHX34,INO80B,PRODH,TMEM94,CHTF8,FBXO10,EMC10,RAD9A,SCO2,HDAC5,AMDHD2,PLEKHJ1,PTPRU…
Pubmed	25468996	E-cadherin interactome complexity and robustness resolved by quantitative proteomics.	Pubmed	7.696E-24	1.107E-18	1.703E-20	2.121E-19	91	565	GPRIN1,ELFN2,EHBP1L1,CASKIN2,ALDOA,ANXA2,DBNL,MYH9,BSG,NOTCH1,NOTCH2,H1FX,PCBP1,PCDH1,RAB11B,NUMBL,SLC9A3R2,SLC9A3R1,CLIC1,PLCB3,PLEC,CNN2,MINK1,KANK2,TBC1D10B,CSNK1D,CTNNB1,TES,PSMB6,CC2D1A,FAM110A,KEAP1,DBN1,CANT1,NECTIN1,PPP1R37,RAN,RANGAP1,EEF2,TBC1D10A,EPHA2,ENO1,RPL6,PLIN3,RPL7A,RPL15,RPL36AL,RPL37,RPS2,RPS26,TUBB4B,FASN,RACK1,BAIAP2,ISYNA1,PUF60,SHB,TUBB,CCDC85C,AHSA1,SLC1A5,ARFGAP2,SLC9A1…
Pubmed	28685749	The E3 ubiquitin ligase and RNA-binding protein ZNF598 orchestrates ribosome quality control of premature polyadenylated mRNAs.	Pubmed	1.092E-23	1.570E-18	2.379E-20	2.963E-19	66	319	MARS,HIST1H4A,SLC25A5,ANXA2,CCAR2,EIF3B,EIF3F,EIF3I,MYH9,ATP5PO,BSG,EIF2B2,ZNF598,NOTCH2,CAD,PHB,SLC25A3,POR,PSMC3,PSMD3,PSMD4,DCTN1,DDOST,PHGDH,SCAMP3,IPO4,EEF2,TRIM28,ENO1,RPS2,RPS3,RPS9,RPS10,RPS16,TUBA1B,TUBB4B,FARSA,FASN,RACK1,EIF3L,MYBBP1A,TUBB,CCT7,SLC1A5,SLC25A1,TIMM50,NBEAL2,SURF4,EIF3K,LMAN2,GCN1,LMNB2,NOMO1,TKT,HBB,CMBL,COPE,GIGYF1,TUFM,HSPA1A,HSPA5,JUP,BAG6,AIMP2,LYZ,SYMPK
Pubmed	27880917	Phenotypic and Interaction Profiling of the Human Phosphatases Identifies Diverse Mitotic Regulators.	Pubmed	1.355E-23	1.949E-18	2.908E-20	3.622E-19	132	1048	MAZ,GPRIN1,CASKIN2,SLC25A5,PPFIA3,CCDC61,ARL2,CCAR2,ATP6V1B2,BAX,BCKDHA,BANF1,BSG,ANKRD52,NOTCH1,CAD,CALR,CTDSP1,AIP,HGS,PALM,NUMBL,PFAS,RCC1,CBARP,SLC9A3R2,CACTIN,SLC9A3R1,DDX54,CPSF1,NOC4L,PYCR2,DCTPP1,PLOD1,COL1A2,RPL36,NOP53,MINK1,FBXL14,POLR2E,POR,PPP1R8,NCOR2,TBC1D10B,PTPA,PPP4C,PPP5C,CSK,PRKCSH,PPP1R12C,SNX17,PSMC3,DAPK3,PSMD3,PSMD4,DDOST,PTPN14,PTPRF,PTPRN,TMEM160,INTS11,PPP1R37,DMWD,PIH1…
Pubmed	24194600	The International Mouse Phenotyping Consortium Web Portal, a unified point of access for knockout mice and related phenotyping data.	Pubmed	1.760E-23	2.532E-18	3.723E-20	4.637E-19	132	1051	DPF1,ACVR2B,MBD6,MDK,ELFN2,ADCYAP1R1,ADSL,CASKIN2,CASKIN1,MAP3K10,MMP15,RSPH9,CBX4,CPNE5,ATF4,ATP1A3,FADD,EIF2B4,H1FX,SELENBP1,HIP1R,CCNB1,OXTR,DPP9,FURIN,CDC34,ARHGAP33,CDKN1A,PDE1B,SLC25A3,MSANTD1,DDX54,KCTD15,PLCB2,SNX15,COL1A2,COL6A2,COL9A2,SPEF1,CRELD2,ATF6B,CRYM,GTPBP2,SYNE3,CSPG4,CST3,FITM2,GGA1,INO80B,PRODH,CLSTN3,NDUFS7,SPOCK2,DBN1,RGP1,CASZ1,DDOST,PTPN14,ZMIZ2,RNF10,EMC10,RAD9A,YPEL3,PT…
Pubmed	22586326	Functional proteomics establishes the interaction of SIRT7 with chromatin remodeling complexes and expands its role in regulation of RNA polymerase I transcription.	Pubmed	3.096E-23	4.453E-18	6.454E-20	8.037E-19	98	653	WDR18,TRRAP,LRRC47,DHX37,ARF3,KHSRP,ARHGDIA,CCAR2,EIF3I,MYH9,RPL10A,BYSL,ANKRD52,H1FX,CAD,CALR,SERPINH1,RRP9,PFAS,CKB,DDX54,CPSF1,NLE1,NOC4L,PLEC,PLOD1,NOP53,POLRMT,SEC24C,SOGA1,INTS1,PSMC3,PYGB,MVP,RANGAP1,UPF1,IPO4,RNH1,MYH14,MRTO4,RPL3,RPL6,RPL7A,RPL8,RPL15,RPLP0,RPLP1,RPLP2,FBL,RPS2,RPS4X,RPS5,RPS10,RPS12,RPS15,RPS16,RPS23,RPS26,FASN,RACK1,SBF1,EIF3L,FKBP4,SEC13,MYBBP1A,CHERP,HYOU1,PUF60,POLD…
Pubmed	21529712	Ribosome-mediated specificity in Hox mRNA translation and vertebrate tissue patterning.	Pubmed	3.249E-22	4.673E-17	6.675E-19	8.313E-18	33	82	RPL10A,RPL3,RPL6,RPL7A,RPL8,RPL15,RPL18,RPL27,RPL27A,RPL28,RPL31,RPL35A,RPL37,RPL37A,RPL39,RPLP0,RPS2,RPS3,RPS5,RPS8,RPS9,RPS10,RPS12,RPS15,RPS15A,RPS16,RPS20,RPS21,RPS23,RPS26,RPS28,RPS29,ISL1
Pubmed	16341674	Transcriptome analysis of human gastric cancer.	Pubmed	4.519E-22	6.499E-17	9.154E-19	1.140E-17	102	723	H2AFV,MDK,MNT,PSMG4,RANBP3,NOB1,ARF6,MT2A,EIF3I,CCND1,NDUFS6,OGG1,PCBP1,CBARP,PEX16,FXYD1,EXOSC4,YIPF3,CHAC1,DDIT4,RPL36,G0S2,POLR1C,LRP10,CCDC9,SF3B5,SLC36A1,PSMB8,PSMB10,DBI,FBXL6,PTMS,CHTF8,NQO1,RNF10,AURKAIP1,QDPR,SCO2,RAP1GAP,SLC35C2,TPGS1,SCAMP3,EEF1B2,TMEM120A,IER3IP1,BSCL2,EMP2,DDX39A,RPA2,RPLP1,RPS3,MRPL27,RPS21,NPM3,CITED2,THEM6,ZBTB7A,PFDN6,FKBP4,PTGES2,PGGHG,AGPAT1,ANAPC11,NAA38,RPUSD…
Pubmed	28902428	Nuclear lamina genetic variants, including a truncated LAP2, in twins and siblings with nonalcoholic fatty liver disease.	Pubmed	8.052E-22	1.158E-16	1.608E-18	2.003E-17	55	244	MARS,HIST1H4I,AP2A1,AP2A2,HIST1H4A,HIST1H4D,HIST1H4F,HIST1H4C,HIST1H4H,ANXA2,CCAR2,EIF3B,EIF3F,MYH9,RPL10A,SQSTM1,CAD,SERPINH1,PCBP1,SLC25A3,SLC25A10,EIF4A3,PTBP1,PHGDH,ARPC1B,SLC25A22,MYH14,RPL3,RPL6,RPL7A,RPL8,RPL27,RPLP2,RPS2,RPS4X,RPS8,RPS9,RPS15,RPS15A,RPS23,FARSA,FASN,EIF3L,MYBBP1A,HYOU1,PUF60,AHSA1,SLC25A1,SNRPD2,RUVBL2,GCN1,EDC4,HSPA5,VIM,LMNA
Pubmed	7671812	Isolation of novel tissue-specific genes from cDNA libraries representing the individual tissue constituents of the gastrulating mouse embryo.	Pubmed	1.053E-21	1.515E-16	2.075E-18	2.585E-17	72	404	AES,NTMT1,APOE,GADD45GIP1,EIF3B,ATOX1,HYAL2,BCL9L,CCND1,PYGO2,CCND3,ABT1,ANAPC2,NLE1,TSR3,POLR1C,GTPBP1,PTBP1,DCTN1,AURKAIP1,SNRNP25,CTDSP2,PDIA6,TRIM28,IER3IP1,NME6,ENO1,RPL8,FBL,RPS9,RPS20,TUBB4B,RACK1,FKBP4,SDC4,ZNF703,MYBBP1A,POLDIP3,TUBB,ZDHHC7,CCT7,BAHD1,RBCK1,BEX3,SPINT2,TRABD,CIAO2B,FTH1,NUDC,FZD2,TOB2,AGO2,BEX1,SURF4,MYDGF,PRPF19,LMAN2,UQCR11,GCN1,TEX261,GUK1,PMF1,HMGA1,PLA2G15,OAF,UMPS,…
Pubmed	23463506	The intracellular interactome of tetraspanin-enriched microdomains reveals their function as sorting machineries toward exosomes.	Pubmed	1.118E-21	1.607E-16	2.172E-18	2.705E-17	51	212	LRRC47,HIST1H2BE,AKT1,KHSRP,EIF3B,EIF3F,EIF3I,ATP5PO,BSG,CD81,PCBP1,CNN2,RPL36,CRIP1,EEF1B2,PDIA6,RPL6,RPL7A,RPL8,RPL11,RPL18,RPL27,RPL27A,RPL31,RPL35A,RPLP0,RPLP2,RPS2,RPS3,RPS4X,RPS8,RPS9,RPS15,RPS16,RPS23,RPS28,TUBA1B,TUBB4B,FAU,RACK1,EIF3L,TUBB,FTH1,FTL,EIF3K,HIST1H2BB,IGSF8,TUBB2A,TUFM,WARS,TUBB2B
Pubmed	20059953	A systems approach reveals that the myogenesis genome network is regulated by the transcriptional repressor RP58.	Pubmed	4.961E-21	7.135E-16	9.514E-18	1.185E-16	153	1398	DPF1,MAFG,MCM2,MEN1,AES,MLLT1,ZNF319,MNT,KLF15,PDLIM4,JRK,ATF4,ZFP92,EDF1,LDB1,NFATC2,NFE2L1,SQSTM1,NFKBIB,NFKBIL1,ANKRD52,NOTCH1,NOTCH2,TAF1C,AIP,PBX2,DEDD,CDKN2D,RAB11B,GLYCTK,ABT1,TFCP2L1,ASB6,DDX54,LSM4,MAPK8IP1,POLR2E,POLRMT,POU3F4,ZNF385A,KANK2,ATF6B,SOX13,NCOR2,FOXP4,ZNF526,CTBP1,CAVIN1,CTNNB1,REM2,PPP1R12C,SCRT1,PSMC3,DAXX,KEAP1,MAFB,DLX6,OLIG1,RARG,HDAC5,TSC22D3,MED16,RELB,E4F1,RFX1,RFX2…
Pubmed	23979707	SILAC-based proteomics of human primary endothelial cell morphogenesis unveils tumor angiogenic markers.	Pubmed	9.319E-21	1.340E-15	1.764E-17	2.196E-16	45	173	HIST1H4I,HIST1H4A,HIST1H4D,HIST1H4F,HIST1H4C,HIST1H4H,SLC25A5,MYH9,ATP5PO,MYL6,PLEC,EIF4A3,PSMB6,PSMC3,DBN1,RAN,RANGAP1,EEF2,RPL11,RPL27,RPL31,RPL35A,RPS3,RPS4X,RPS5,RPS10,RPS15A,RPS16,RPS20,TUBB4B,TUBB,HEXIM1,GALK1,TINAGL1,EIF3K,TGFBI,TGM2,TIMP2,HSPA5,HSPB1,VIM,HSPG2,VWF,JUP,LMNA
Pubmed	27499296	Mitochondrial Protein Interaction Mapping Identifies Regulators of Respiratory Chain Function.	Pubmed	9.474E-21	1.362E-15	1.769E-17	2.204E-16	71	409	ACAA1,ACADVL,COMTD1,TOMM5,TIMM29,ATP5F1E,ATP5ME,ATP5PO,BAX,BCKDHA,NDUFA2,NDUFA3,NDUFA6,NDUFA8,NDUFB7,NDUFB8,NDUFB10,NDUFV1,NDUFS6,NDUFS8,NDUFV3,NME2,CBR3,TBRG4,UQCR10,SLC25A3,NDUFB11,COMT,NDUFAF3,POLRMT,SLC25A10,ABHD11,ROMO1,NDUFS7,AURKAIP1,HSDL1,SCO2,MRPS16,FIS1,PAM16,BOLA1,CCDC51,ECH1,SLC25A51,NME6,GLRX5,TMEM205,SDHB,PTGES2,SLC25A1,FTH1,TIMM50,UQCRQ,COASY,CYB5R1,DHRS4,NDUFA12,MLYCD,GUK1,FKBP8,M…
Pubmed	22673621	Identification of atrogin-1-targeted proteins during the myostatin-induced skeletal muscle wasting.	Pubmed	9.872E-21	1.420E-15	1.820E-17	2.267E-16	40	136	CLPP,MDH2,LRRC47,AK1,ALDOA,ANXA2,ARHGDIA,EIF3B,EIF3F,ATP5F1D,MYL6,PCBP1,UBQLN2,CAVIN1,PRKCSH,PSMC3,EEF1B2,EEF2,PDIA6,ENO1,RPL6,RPL18,RPLP0,RPLP2,RTN2,FBLN2,CCT7,H2AFJ,SNRNP70,SOD1,ADRM1,THOP1,INF2,HBA2,VIM,YWHAG,IMPDH2,TUBB2B,JUP,LYZ
Pubmed	15618518	Mouse brain organization revealed through direct genome-scale TF expression analysis.	Pubmed	1.231E-20	1.770E-15	2.241E-17	2.791E-16	173	1689	DPF1,MAFG,MAZ,MLLT6,FOXO4,THAP3,ZNF319,MNT,KLF15,PDLIM4,JRK,ATF4,ZFP92,EIF3F,NPAS4,LDB1,PYGO2,NFATC2,NFE2L1,SQSTM1,NFKBIA,EIF2B2,ZNF598,CTDSP1,AIP,PBX2,ABT1,CHD3,TFCP2L1,PLXNA1,MIER2,POLR2I,POU3F4,ZNF385A,ATF6B,SOX13,CRIP1,FOXP4,TRAF4,ZNF526,CSRP2,KDM4A,CAVIN1,TES,SCRT1,CASZ1,KLHL21,ZMIZ2,KBTBD11,RNF10,MAFB,DLX6,OLIG1,ROGDI,RARG,TSC22D3,RELB,E4F1,RET,RFX1,RFX2,CTDSP2,ZNF710,RING1,ZNF668,EGR3,TRIM…
Pubmed	27049334	Nuclear Functions of Nucleolin through Global Proteomics and Interactomic Approaches.	Pubmed	1.660E-20	2.388E-15	2.985E-17	3.717E-16	41	145	H1FX,NOC4L,EXOSC4,RPL36,NOP53,POLR1C,GRWD1,MRPS7,MRTO4,RPL3,RPL6,RPL7A,RPL8,RPL11,RPL15,RPL18,RPL27,RPL27A,RPL28,RPL31,RPL35A,RPLP0,RPLP1,RPS3,RPS4X,RPS8,RPS9,RPS10,RPS12,RPS15,RPS16,RPS20,RPS23,RPS26,DDX41,MYBBP1A,PUF60,SLC25A1,SNRPD2,HDGFL2,U2AF2
Pubmed	8706699	Characterization of the human small-ribosomal-subunit proteins by N-terminal and internal sequencing, and mass spectrometry.	Pubmed	2.326E-20	3.346E-15	4.130E-17	5.144E-16	22	36	RPS2,RPS3,RPS4X,RPS5,RPS8,RPS9,RPS10,RPS12,RPS15,RPS15A,RPS16,RPS20,RPS21,RPS23,RPS26,RPS27A,RPS28,RPS29,FAU,FTL,HBA2,RPSA
Pubmed	21081666	Nuclear import of histone deacetylase 5 by requisite nuclear localization signal phosphorylation.	Pubmed	7.102E-20	1.021E-14	1.246E-16	1.551E-15	54	258	MARS,MCM2,MDH2,ALDOA,CCAR2,EIF3B,EIF3F,MYH9,RPL10A,CAD,PHB,CKB,SLC25A3,NCOR2,EIF4A3,PSMB5,PSMD3,PTBP1,DDOST,PHGDH,RAN,HDAC5,UPF1,ECH1,PDIA6,TRIM28,RPL3,RPL7A,RPLP0,RPS3,RPS4X,RPS8,TUBB4B,FASN,EIF3L,TUBB,SHMT2,CCT7,SLC25A1,NUDC,RUVBL2,PRPF19,GCN1,TKT,HSD17B10,TUFM,PRMT1,HSPA1A,HSPA5,YWHAG,IMPDH2,DDX39B,RPSA,LGALS3BP
Pubmed	25609649	Proteomic analyses reveal distinct chromatin-associated and soluble transcription factor complexes.	Pubmed	1.072E-19	1.541E-14	1.857E-16	2.313E-15	108	852	WDR18,TRRAP,BAP1,MEN1,HIST1H2BC,FOXO4,MNT,FOXO6,GADD45GIP1,KHSRP,CCAR2,NDUFV1,LDB1,NFATC2,NFKBIA,ZNF598,ANKRD52,NOTCH1,NOTCH2,PBX2,LRWD1,RCC1,PFKL,SH3TC1,BRMS1,PLEKHG4,POLRMT,KANK2,SH2B1,PARS2,NCOR2,FOXP4,CTNNB1,SNX17,DCTN1,CASZ1,NOP9,AP5Z1,RANGAP1,HDAC5,DVL2,SAP30L,RELB,E4F1,RFX1,RFX2,KIF7,MRPS18A,PANK4,STK40,DDX39A,RPA2,NR2F6,RPS3,MRPL27,RXRA,HMG20B,FASN,SALL2,FEN1,FOXG1,FOXJ1,PUF60,FOSB,FOSL2,…
Pubmed	16303743	Signal sequence and keyword trap in silico for selection of full-length human cDNAs encoding secretion or membrane proteins from oligo-capped cDNA libraries.	Pubmed	1.705E-19	2.452E-14	2.919E-16	3.636E-15	71	430	ADCY3,MGAT1,TP53I13,C1QTNF1,LEMD2,GLIPR2,ATP5MC2,MATN4,SLC5A6,CACNA1H,TMEM86A,NT5E,WFDC1,TMED4,ENTPD6,PCDH1,ADGRG1,SRPRB,SLC25A3,RETREG2,CXCL14,CRH,SLC25A10,GGA1,RETSAT,CANT1,SV2A,KLHL21,DNASE2,SEZ6L2,TMX2,APH1A,ELN,LAMC3,THEM6,FBLN1,FCGRT,SCAP,ERGIC3,TMBIM4,CYB5R1,SLC39A1,JAGN1,PERP,GPRC5C,RUVBL2,TINAGL1,BLCAP,ALG1,TEX261,TMEM119,CACFD1,MFSD2A,SLC7A3,TMEM9,LRRC8A,MFSD5,PGAP3,PLXNB2,PLA2G15,PIK3I…
Pubmed	12588972	Transcript-selective translational silencing by gamma interferon is directed by a novel structural element in the ceruloplasmin mRNA 3' untranslated region.	Pubmed	3.176E-19	4.568E-14	5.374E-16	6.692E-15	25	53	EIF3B,EIF3F,EIF3I,RPS2,RPS3,RPS4X,RPS5,RPS8,RPS9,RPS10,RPS12,RPS15,RPS15A,RPS16,RPS20,RPS21,RPS23,RPS26,RPS27A,RPS28,RPS29,FAU,EIF3K,EIF4H,RPSA
Pubmed	23602568	The protein interaction landscape of the human CMGC kinase group.	Pubmed	3.250E-19	4.674E-14	5.434E-16	6.768E-15	94	694	MAZ,WDR18,MDK,ADPRH,MLLT1,CCDC97,EIF3I,SRSF9,CDK5R1,SNU13,CACNA1H,CACNB1,TRIM41,CCNB1,CCND3,DYRK1B,FIBP,PCBP1,CDKN1A,CDKN2D,DDX54,CPSF1,HOMER3,POLR2E,CBLN4,PPP5C,DYNLL2,CTNNB1,MAPK7,SF3B5,LZTS3,TMEM94,EIF4A3,PSMA7,PSMB5,PTBP1,CCM2,YPEL3,OCEL1,EGLN2,RANGAP1,FRAT1,MED16,DUSP8,ECM1,ARPC1B,EEF2,DDX39A,ZNF444,SF3B4,RPL41,STUB1,WDR81,FAM53C,FGFR1,HAX1,BAIAP2,PFDN6,FKBP5,SEC13,MYBBP1A,CHERP,DRAP1,TRABD,…
Pubmed	19199708	Proteomic analysis of human parotid gland exosomes by multidimensional protein identification technology (MudPIT).	Pubmed	4.303E-19	6.188E-14	7.113E-16	8.858E-15	69	416	HIST1H4I,MFGE8,MGAT1,HIST1H4A,HIST1H4D,HIST1H4F,HIST1H4C,HIST1H4H,ALDOA,ANXA2,RHOC,ATP6V1B2,MYH9,NME2,DDR1,CALR,CAPNS1,CBR1,PEBP1,FURIN,CD81,ATP6V1F,PFKL,SLC9A3R1,PLEC,CNP,COL6A2,S100A16,CST3,CSTB,CTNNB1,PHGDH,PTPRF,MVP,ECM1,EEF2,ENO1,RPS27A,SDC4,VAT1,HYOU1,SLC9A1,CYB5R1,TINAGL1,EHD1,GNA11,GNAI2,GPC1,GSN,TGFBI,IGSF8,HLA-A,PARK7,HSPA1A,HSPA1B,HSPA5,HSPB1,HSPG2,VWA1,YWHAG,SEMA3G,ITGB4,FAM20C,CD82,I…
Pubmed	24154525	Conserved molecular signatures of neurogenesis in the hippocampal subgranular zone of rodents and primates.	Pubmed	7.160E-19	1.030E-13	1.170E-15	1.457E-14	62	348	MFGE8,HIST1H2BC,MIF,TMEM176B,APOE,CPNE5,PDLIM4,DCHS1,FXYD6,C1QC,NNAT,NOS1,NOTCH2,CBS,CLDN11,CD81,SLC10A4,ADGRG1,CKB,PLTP,CNP,PNOC,NECAB2,CORT,CXCL14,SLC32A1,CST3,CLSTN3,SCRT1,DBI,PTPRN,MAFB,TMX2,SEZ6,PLPPR3,RXFP3,FASN,FGFR1,NPC2,BCAN,GAA,GAD1,SPARC,HOPX,GFAP,ACSBG1,MLC1,KAZN,GSN,THRSP,CARHSP1,CADM4,VAV2,VIM,RGS8,IGFBP4,DPYSL5,ITGB5,CAMK1G,LIMK1,RND2,SPATA13
Pubmed	12665801	Exploring proteomes and analyzing protein processing by mass spectrometric identification of sorted N-terminal peptides.	Pubmed	7.723E-19	1.111E-13	1.248E-15	1.554E-14	53	262	MIF,ALAD,ALDOA,FHOD1,ATP2A3,ATP5PO,CDKN2D,PFKL,SLC9A3R1,CNN2,MINK1,AAR2,PRKCSH,SNX17,DBI,DBN1,DCTN1,PYGB,ARPC1B,ENO1,DCXR,FARSA,SEC13,FLII,NAGK,SOD1,SPTB,RUVBL2,MLC1,EHD1,ACOT2,GP1BB,COTL1,GSN,CDC42EP1,GSTP1,INF2,TKT,TLN1,HBA2,COPE,TST,TUFM,UBA7,VASP,VWF,EIF4H,IFI35,YWHAG,NDUFA11,IVD,MANF,BOLA2
Pubmed	23402259	Quantitative study of the interactome of PKC? involved in the EGF-induced tumor cell chemotaxis.	Pubmed	8.602E-19	1.237E-13	1.375E-15	1.712E-14	44	184	TRRAP,SLC25A5,ANXA2,EIF3I,SQSTM1,PCBP1,SLC25A3,POLR2E,CAVIN1,PSMD4,KEAP1,PTPN14,PYGB,GRWD1,EEF1B2,EEF2,RNH1,TRIM28,ENO1,RPLP0,RPLP1,MRPL12,RPS5,RPS12,RPS28,NPM3,FASN,MRPL28,SNRPD2,PARD6B,GRN,CDC37,PARK7,COPE,TUFM,HSPA5,VASP,HSPB1,MRPL38,IMPDH2,LAMB2,MRPL52,LLGL1,BOLA2
Pubmed	25056061	Biological insights from 108 schizophrenia-associated genetic loci.	Pubmed	1.348E-18	1.939E-13	2.131E-15	2.654E-14	57	303	ASPHD1,KCTD13,PRR12,ALDOA,PITPNM2,NDUFA6,NRGN,FURIN,TRMT61A,ANKRD63,CKB,TAOK2,SCAF1,ZFYVE21,PLCB2,SLC32A1,PPP4C,NCAN,KDM4A,PRRG2,PSMB10,PTPRF,PARD6A,YPEL3,FAM57B,RANGAP1,OGFOD2,SEZ6L2,NOSIP,TMX2,APH1A,SLC38A7,ACTR5,FAM53C,ENKD1,FES,CENPT,SHMT2,SLC12A4,PDCD11,SREBF1,SREBF2,STAB1,CHADL,MAU2,TLE3,NISCH,EDC4,PLA2G15,HSPE1,NT5DC2,PAK6,TRIM8,RILPL2,LCAT,LRP1,RCN3
Pubmed	22190034	Global landscape of HIV-human protein complexes.	Pubmed	1.383E-18	1.989E-13	2.162E-15	2.693E-14	72	457	MARS,LRRC47,MLLT1,RHOC,FLCN,CCAR2,EIF3B,EIF3F,EIF3I,ATP2A3,ATP5F1D,ATP5PO,NDUFB10,NDUFS8,SQSTM1,PIP4P1,SNU13,AP1M1,CALR,SERPINH1,TMED4,TBRG4,PHB,SLC9A3R1,DDA1,ANAPC2,PLOD1,DDX49,COMT,NOL12,TMED9,PRKCSH,PSMB6,TMEM160,ACOT8,SCAMP3,IPO4,PDIA6,RNH1,STUB1,HGH1,NPM3,EIF3L,FKBP4,HYOU1,SSSCA1,MCRIP2,RNF126,EML3,ERGIC3,CIAO2B,NUDC,CYB5R1,UNC45A,TYSND1,SURF4,EIF3K,LMAN2,SLC27A4,ELOB,MEPCE,HLA-A,EDC4,SDF2L1…
Pubmed	26561776	Reversible oxidation of phosphatase and tensin homolog (PTEN) alters its interactions with signaling and regulatory proteins.	Pubmed	2.215E-18	3.186E-13	3.426E-15	4.266E-14	32	98	SLC25A5,ANXA2,RPL10A,SLC25A3,PLEC,DBN1,EEF2,RPL27,RPL27A,RPL31,RPLP0,RPLP2,RPS2,RPS3,RPS4X,RPS9,RPS15A,RPS20,RPS26,RPS27A,TUBA1B,TUBB4B,FASN,SDC4,TUBB,KBTBD4,RCC2,GNAI2,GPC1,GSTM2,TUFM,JUP
Pubmed	21630459	Proteomic characterization of the human sperm nucleus.	Pubmed	6.416E-18	9.227E-13	9.816E-15	1.222E-13	69	437	H2AFV,ACADS,MDH2,HIST1H4I,HIST1H2BE,HIST1H2BC,HIST1H4A,HIST1H4D,HIST1H4F,HIST1H4C,HIST1H4H,ALAD,ALDOA,SLC25A5,ANXA2,APOE,PDXK,RANGRF,ATP5PO,BANF1,RPL10A,NME2,CALR,PEBP1,RCC1,SLC25A10,DYNLL2,TES,PSMA7,PSMB5,PSMB6,PSMC3,PSMD3,RAN,SLC25A42,TMEM53,AMDHD2,NPEPL1,EEF2,ENO1,RPL3,DCXR,RPL6,RPL7A,RPL15,RPL18,RPL27,RPL37A,RPS2,RPS8,RPS9,KATNB1,RPS27A,TUBB4B,TUBB,SLC25A1,FTH1,SOD1,GNL1,TEKT5,HIST1H2BB,DNPEP…
Pubmed	15883184	Mass spectrometric analysis of the human 40S ribosomal subunit: native and HCV IRES-bound complexes.	Pubmed	8.514E-18	1.224E-12	1.289E-14	1.605E-13	19	31	RPS2,RPS3,RPS4X,RPS5,RPS8,RPS9,RPS10,RPS12,RPS15,RPS15A,RPS16,RPS20,RPS21,RPS23,RPS26,RPS27A,RPS28,RPS29,FAU
Pubmed	27705803	A High-Density Map for Navigating the Human Polycomb Complexome.	Pubmed	9.281E-18	1.335E-12	1.390E-14	1.732E-13	74	495	MBD6,BAP1,MEN1,MNT,GIT1,CBX4,MBD3,ARF3,EIF3B,MYH9,DYRK1B,PCBP1,CHD3,TFPT,DDX54,BRMS1,NOP53,FBXL14,SLC25A10,DYNLL2,CTBP1,INO80B,PSMA7,PSMB5,PSMB6,PSMC3,PSMD3,PSMD4,FBXL6,COMMD4,FBXO10,KLHL21,SAP30L,RING1,TRIM28,RPL35A,RPL37A,RPL39,ACTR5,FBL,RPS3,CXXC1,FAM53C,FBXL18,PFDN6,TADA3,ZNF703,FBXW9,PRR5,CCT7,MCRIP2,MXD4,TIMM50,FBXO21,NUDC,GALK1,RUVBL2,AHDC1,EHMT2,ELOB,SIN3B,GRN,LMNB2,FBXO46,ZNF503,CDC37,GS…
Pubmed	15592455	Immunoaffinity profiling of tyrosine phosphorylation in cancer cells.	Pubmed	1.026E-17	1.475E-12	1.521E-14	1.894E-13	58	326	MDH2,CASKIN2,MIF,ALDOA,GIT1,DBNL,EIF3B,LSM2,EIF3I,SQSTM1,ZNF598,AIP,HGS,PCDH1,PFKL,TBCB,PIK3R2,PLEC,POLR1C,CAVIN1,CC2D1A,KBTBD11,LAMTOR1,MVP,RAN,SCAMP3,TNK2,ENO1,ENO2,RPL3,RPL8,RPL31,SF3B4,RPLP0,RPS10,WDR54,TUBA1B,RACK1,BAIAP2,SHB,TUBB,PCID2,SIPA1L3,GART,STAT3,CDC37,TGM2,TKT,TLN1,PARK7,FKBP8,VASP,VIM,EIF4H,ZCCHC3,IMPDH2,JAK3,RPSA
Pubmed	23824909	Bcl2-associated athanogene 3 interactome analysis reveals a new role in modulating proteasome activity.	Pubmed	2.770E-17	3.984E-12	4.066E-14	5.063E-13	62	374	SLC25A5,ANXA2,BMF,DBNL,ASL,JRK,FLCN,BAX,SQSTM1,NFKBIB,NANS,PEBP1,PLEC,CRIP2,CSTB,CTBP1,CAVIN1,MAPK7,GGA1,PRRG2,PSMA7,PSMB5,PSMC3,PSMD3,NQO1,LAMTOR1,PDCD6,NUBP2,EIF4EBP2,ZBTB3,SF3B4,RPS2,RPS12,SEC13,FOSB,AGPAT1,FUZ,CCT7,PIGV,DOK4,COASY,GALK1,RUVBL2,ZCCHC14,TAGLN,ALG1,TIMP2,CMBL,TPT1,COPE,TSTA3,UBE2G2,UROD,HSPA1A,VIM,ZNF428,YWHAG,NR2C2AP,UBE2Z,AIMP2,RPSA,RAB1B
Pubmed	24778252	TRIM65 regulates microRNA activity by ubiquitination of TNRC6.	Pubmed	2.932E-17	4.216E-12	4.259E-14	5.304E-13	61	364	WDR18,MCRIP1,TRRAP,MEN1,NOB1,GADD45GIP1,CCDC124,SQSTM1,EIF2B4,BYSL,SNU13,AP1M1,AIP,RRP9,LRWD1,PFAS,PIK3R2,NOP53,KANK2,GTPBP2,CSK,SLC25A10,NDUFS7,QPCTL,EIF4A3,KEAP1,KLHL21,PDCD6,UPF1,MRTO4,STUB1,FBL,DDX41,FKBP5,PPP6R1,NHP2,MCRIP2,TRMT2A,TRIM32,LSM14B,SNRNP70,SNRPA,SNRPG,AGO2,SRP54,RRP12,PRPF19,OBSL1,LMNB2,MEPCE,COPE,EDC4,PRMT1,ZNF574,ZCCHC3,NOL6,BAG6,PYCR3,ZNF628,LGALS3BP,MLF2
Pubmed	15231748	Functional proteomics mapping of a human signaling pathway.	Pubmed	4.920E-17	7.077E-12	7.077E-14	8.813E-13	81	591	MGAT1,AP2A1,AP2A2,CBX4,EIF3F,AUP1,LDB1,FMNL1,NOTCH2,PCDH1,CHD3,PFKL,ANAPC2,PLEC,PYCR2,EPN1,UBQLN2,SOX13,PPP1R8,NCOR2,TRAF4,CSPG4,CTNNB1,GGA1,PSAP,SNX17,KEAP1,DCTN1,PTPRF,PPP1R37,CHPF,EGLN2,E4F1,RFX1,ZBTB3,PLIN3,RPL28,RPLP0,RPS27A,RXRA,FBLN1,EIF3L,FLT4,NAGK,BTBD2,LIMS2,PIAS4,RNF123,SLC12A4,FTL,SNRNP70,SNRPA,SPINT1,UNC45A,PPP1R13L,TINAGL1,TMED1,GRN,NOMO1,TGM2,C12orf10,U2AF2,PPP1R15A,UBC,DNAJB2,HSPG…
Pubmed	17207965	hORFeome v3.1: a resource of human open reading frames representing over 10,000 human genes.	Pubmed	5.072E-17	7.295E-12	7.223E-14	8.995E-13	162	1675	HIST1H4I,ADPRH,TMEM176B,SLC25A5,CNIH2,BMF,DBNL,CCDC12,GADD45GIP1,PDLIM4,SCRN2,CCDC124,FLCN,LRRC61,EIF3F,MYL6,CDK5R1,WRAP73,TMEM86A,SELENBP1,NTS,KYAT1,PALM,AP4M1,PBX2,PCBP1,CBARP,SRPRB,GDAP1L1,TFPT,ASB6,PEX16,KCTD15,PYCR2,DDX49,MPDU1,FBXL14,POLR2E,POLR1C,ATP6V1G1,PARS2,AAR2,PPP1R8,CBLN4,NKAIN4,KLHDC3,RASL10B,SZRD1,UBALD1,PSMB5,DBI,RGP1,SLC25A38,PCYT2,AURKAIP1,PIH1D1,TTC38,DPAGT1,OCEL1,TMEM53,CHMP6…
Pubmed	28611215	Genome-wide CRISPR screen identifies HNRNPL as a prostate cancer dependency regulating RNA splicing.	Pubmed	5.465E-17	7.860E-12	7.706E-14	9.596E-13	149	1489	GTPBP6,MARS,ACVR2B,TRRAP,ADCY3,AES,IGSF9,NLGN2,ARHGEF37,DOCK6,PITPNM2,ENC1,CCDC12,PDXK,SPTBN4,TPRA1,BAD,FGFRL1,CCND1,BCR,NDUFB8,LDB1,EIF2B4,CACNA1H,BAIAP3,NOTCH2,DDR1,CAMK2B,CCND3,DPP9,PBX2,PCDH1,CEP170B,NUMBL,ADGRG1,CHD3,PFKL,AP1S1,SH3TC1,NTN1,PLOD1,BRMS1,MINK1,TP53I11,ZNF385A,SH2B1,NCOR2,FOXP4,PPP4C,SOGA1,CSNK1D,VSTM2L,CTBP1,CROCC,MAP2K2,NDUFS7,TBKBP1,CASZ1,UCKL1,SLC12A6,SLC25A42,SAMD4B,TPGS1,P…
Pubmed	20020773	Global analysis of TDP-43 interacting proteins reveals strong association with RNA splicing and translation machinery.	Pubmed	6.952E-17	9.998E-12	9.707E-14	1.209E-12	46	223	SLC25A5,KHSRP,CCAR2,EIF3B,EIF3I,MYH9,RPL10A,H1FX,PCBP1,CPSF1,POLRMT,QPCTL,PTBP1,PHGDH,RNF10,UPF1,EEF2,TRIM28,RPL3,RPL6,RPL7A,RPL8,RPL11,RPL15,RPL28,RPL31,RPLP0,MRPL12,FBL,RPS2,RPS3,RPS4X,RPS9,RPS16,RPS20,RPS23,TUBA1B,RACK1,MYBBP1A,TUBB,AGO2,RUVBL2,PRPF19,HSPA5,JUP,RPSA
Pubmed	17114649	Qualitative and quantitative analyses of protein phosphorylation in naive and stimulated mouse synaptosomal preparations.	Pubmed	7.889E-17	1.135E-11	1.091E-13	1.359E-12	57	330	LMTK3,GPRIN1,ELFN2,ADCY5,AP2A1,CASKIN1,NLGN2,ALDOA,BEGAIN,MPP2,AMFR,GIT1,HCN3,SAMD14,ATP6V1B2,CDS2,HCN2,SYNGAP1,CACNB1,CAMK2B,CLDN11,DYRK1B,PALM,CEP170B,NUMBL,AP1S1,SLC9A3R1,PLEC,UBQLN2,MINK1,GTPBP1,PITPNM1,RIN1,CTNNB1,SNX17,DBN1,RUSC2,C2CD2L,SV2A,KBTBD11,DLG4,ENO1,RPS3,BAIAP2,AGAP2,CAMKK1,DLGAP4,BCAN,SNTA1,MAPK8IP3,PRRT3,SRCIN1,CDC42EP4,MTCH1,CLIP2,ITM2C,MLF2
Pubmed	23455922	Interlaboratory reproducibility of large-scale human protein-complex analysis by standardized AP-MS.	Pubmed	7.985E-17	1.148E-11	1.094E-13	1.362E-12	68	447	GRK2,MLLT1,GIT1,EIF3B,CCND1,BCR,SQSTM1,CAD,AIP,CCNB1,CCND3,FIBP,CDKN1A,SLC25A3,CSK,KLHDC3,CSNK1D,DYNLL2,PRKCD,TMEM94,FAM110A,PHGDH,RAN,SCO2,FRAT1,DVL2,RING1,CNNM3,EEF2,MAP1S,TRIM28,SNX22,RPL27A,RPL31,STUB1,RPS3,RPS4X,RPS23,RPS27A,TUBB4B,FASN,CDIPT,EIF3L,FKBP5,SEC13,CCT7,HEXIM1,LIMS2,TRABD,TIMM50,SNRPD2,ZSWIM8,UNC45A,PRPF19,GCN1,HDGFL2,ELOB,OBSL1,TNS2,GRN,CDC37,MEPCE,TUFM,PRMT1,HSPA1A,HSPA5,VIM,RH…
Pubmed	21182205	Identification of proteins associated with ligand-activated estrogen receptor ? in human breast cancer cell nuclei by tandem affinity purification and nano LC-MS/MS.	Pubmed	1.296E-16	1.863E-11	1.758E-13	2.189E-12	48	245	WDR18,SLC25A5,ANXA2,MYH9,MYL6,RPL10A,SERPINH1,DDX54,PLEC,RPL36,DBN1,UPF1,ATP9A,MYH14,RPL3,RPL6,RPL7A,RPL8,RPL11,RPL18,RPL27A,RPL28,RPL36AL,RPL37A,RPLP0,RPS2,RPS3,RPS4X,RPS8,RPS9,RPS12,RPS15A,RPS16,RPS20,RPS23,RPS26,THEM6,MYBBP1A,ALKBH7,ARFGAP2,UNC45A,RUVBL2,RRP12,GSN,U2AF2,HPCAL1,JUP,RPSA
Pubmed	16751776	A germline-specific class of small RNAs binds mammalian Piwi proteins.	Pubmed	1.819E-16	2.616E-11	2.445E-13	3.045E-12	67	443	MAFG,KCTD13,MAZ,ELFN2,BAP1,AMFR,ATF4,SQSTM1,SLC5A6,NOTCH2,HIP1R,LRWD1,PFAS,SRPRB,ASB6,COX5B,ATP6V1G1,PTPA,SEC24C,LRP10,KLHDC3,GGA1,PSAP,MLEC,RGP1,CANT1,PEX5,PCYT2,DMWD,SLC25A51,CTDSP2,EIF4EBP2,TNK2,BSCL2,MFSD13A,RPL18,SF3B4,RPS28,SOCS7,SBF1,PQLC1,DLGAP4,EIF1AD,SCAP,SPINT2,FUCA1,SYVN1,SAYSD1,MAST3,WDTC1,AGO2,SPTB,TYSND1,RCC2,MLC1,PIGO,PRRC2B,TEX261,UNC119B,LIMD2,U2AF2,RUNDC1,IMPDH1,LAMB2,LRP1,LTBP…
Pubmed	21565611	Mapping the NPHP-JBTS-MKS protein network reveals ciliopathy disease genes and pathways.	Pubmed	2.203E-16	3.169E-11	2.934E-13	3.654E-12	74	524	HIST1H2BE,ALDOA,AMFR,ANXA2,DBNL,KHSRP,ATP5F1D,MYH9,NDUFS6,CAD,SERPINH1,PEBP1,PALM,PCBP1,CKB,SLC25A3,PLEC,PITPNM1,CALY,PSMA7,PSMB5,PSMB6,PSMD3,DBN1,QDPR,ECH1,ANGPTL6,EEF2,RNH1,TRIM28,EPHA2,ENO1,RPL11,ANKRD13B,RPLP0,RPS3,RPS15A,RPS16,RPS27A,RPS28,TUBA1B,TUBB4B,CDIPT,VAT1,ITGA11,TUBB,EML3,FSCN1,SAYSD1,NEURL4,SOD1,RUVBL2,GFAP,GCN1,GSN,GUK1,HBA2,TUBB2A,TUFM,HPCAL1,UCHL1,RIC8A,HSPA5,HSPB1,VIM,ID3,YWHAG…
Pubmed	25852190	Integrative analysis of kinase networks in TRAIL-induced apoptosis provides a source of potential targets for combination therapy.	Pubmed	2.252E-16	3.239E-11	2.972E-13	3.701E-12	63	401	H2AFV,AP2A1,GIT1,ATP5F1D,ATP5F1E,ATP5ME,ATP5PO,SQSTM1,CAD,MAP3K6,CCNB1,FIBP,PCBP1,CEP170B,ANAPC2,MINK1,SLC25A10,CTNNB1,MAP2K2,TMEM94,PSMB5,PARD6A,RAN,RING1,SLC25A22,EEF2,TRIM28,STK40,RPL37,RPL39,RPLP1,STUB1,FBL,RPS21,ANKRD54,FASN,FES,HAX1,FKBP5,CCT7,SLC2A1,ATP5MG,SPINT2,SLC25A1,TIMM50,MAST3,RUVBL2,PARD6B,STK11,GCN1,TKT,PMF1,HLA-A,TUBB2A,HSPB1,HSPE1,YWHAG,ITGB4,JAK3,LIMK2,LLGL1,LMNA,SFXN3
Pubmed	15342556	Sequence comparison of human and mouse genes reveals a homologous block structure in the promoter regions.	Pubmed	2.593E-16	3.730E-11	3.390E-13	4.222E-12	125	1178	ACVR2B,MDH2,MGAT1,ADSL,FOXO4,TMEM176B,BMF,MT3,CCDC124,GLIPR2,POLD4,LSM2,CDS2,NDUFB6,NDUFB10,NDUFV1,RPL10A,CACNB1,PALM,RAB11B,PDE1B,PHB,CKB,TAOK2,GDAP1L1,SLC9A3R1,KCTD15,NLE1,PLEC,TMCO1,DDX49,POLD2,MPDU1,POR,NKAIN4,CSPG4,TMED9,KDM4A,PRKCSH,GGA1,ROMO1,QPCTL,PSMB10,PSMC3,SPOCK2,DBI,DDOST,CHTF8,SV2A,DLG4,AURKAIP1,RAP1GAP,CHMP6,DVL1,CCDC51,NPEPL1,SLC25A51,MRPS7,SERF2,RNF41,MRTO4,BSCL2,ELN,RPL27,RPL28,…
Pubmed	28561026	R2TP/Prefoldin-like component RUVBL1/RUVBL2 directly interacts with ZNHIT2 to regulate assembly of U5 small nuclear ribonucleoprotein.	Pubmed	3.551E-16	5.106E-11	4.600E-13	5.729E-12	53	300	TRRAP,SQSTM1,SCAF1,CACTIN,POLR2E,POLR1C,AAR2,INO80B,LAMTOR1,PIH1D1,UPF1,TSSC4,KLHL36,RPL3,RPL6,RPL7A,RPL8,RPL11,RPL18,RPL27,RPL27A,RPL28,RPL31,RPLP0,RPLP2,ACTR5,RPS2,RPS3,RPS8,RPS16,SBF1,ZNHIT1,PFDN6,SEC13,PUF60,CCT7,SLC1A5,MAP7D1,SNRNP70,SNRPD2,SNRPG,KIF1C,RUVBL2,NCDN,DMAP1,RRP12,PRPF19,OBSL1,U2AF2,YWHAG,TOE1,NT5DC2,PDRG1
Pubmed	24797263	Proteomic analysis of the epidermal growth factor receptor (EGFR) interactome and post-translational modifications associated with receptor endocytosis in response to EGF and stress.	Pubmed	5.205E-16	7.486E-11	6.684E-13	8.323E-12	55	323	CLPP,AP2A1,AP2A2,ARF6,EIF3F,EIF2B4,EIF2B2,AP1M1,H1FX,CALR,LRWD1,PFKL,SRPRB,AP1S1,AP2S1,PYCR2,CNP,CSK,CTBP1,MAP2K2,PTPRF,CARS2,SCAMP3,NUBP2,EEF1B2,EPHA2,PANK4,MRTO4,FBL,RPS15A,FARSA,CDIPT,HYOU1,SLC1A5,TBL3,ATP5MG,NSUN5,TRMT2A,TIMM50,EHD1,EIF3K,GRN,THOP1,HSD17B10,HLA-A,UBE2G2,SDF2L1,UMPS,VAV2,NT5DC2,MRPL9,NCLN,JUP,COQ8A,SFXN3
Pubmed	18854154	Global analysis of host-pathogen interactions that regulate early-stage HIV-1 replication.	Pubmed	5.500E-16	7.910E-11	7.000E-13	8.718E-12	51	283	GRK2,AES,MPP2,ENC1,CHST1,MT2A,RPL10A,MYRF,CAD,NUMBL,PFKL,SCAF1,ANAPC2,NTN1,PMM1,NDUFAF3,POLR2I,PPP1R12C,PSMA7,PSMB6,PSMC3,CANT1,RNF10,NLRX1,AMDHD2,PTPRU,CCDC51,RNH1,RPL18,MRPS12,FPGS,DLGAP4,MUS81,COASY,SNRPA,USE1,ARID5A,STAB1,ZGPAT,LMAN2,CHADL,CDH22,SLC35A2,UMPS,VWF,DPYSL5,BTG2,TRIM8,PYCR3,LIMK2,SFXN3
Pubmed	25324306	hnRNPA1 couples nuclear export and translation of specific mRNAs downstream of FGF-2/S6K2 signalling.	Pubmed	7.037E-16	1.012E-10	8.878E-13	1.106E-11	57	346	ALDOA,SLC25A5,ANXA2,ARF3,KHSRP,CCDC124,MRPL15,CCAR2,EIF3B,MYH9,H1FX,CAD,PCBP1,PLOD1,EIF4A3,PSMC3,PSMD3,PTBP1,PHGDH,MRPS7,EEF2,ENO1,RPL8,STUB1,RPS2,RPS3,RPS4X,RPS5,RPS8,TUBA1B,TUBB4B,RACK1,FKBP5,POLDIP3,TUBB,CCT7,PPP6R1,NSUN5,TIMM50,NUDC,RUVBL2,PRPF19,ALG1,GSN,CDC37,GSTP1,HLA-A,TUFM,PRMT1,FKBP8,HSPA1A,HSPA5,HSPB1,MRPL38,JUP,LMNA,LYZ
Pubmed	20562859	Network organization of the human autophagy system.	Pubmed	7.442E-16	1.070E-10	9.307E-13	1.159E-11	65	433	MCM2,ADSL,ULK1,ALDH2,VPS18,CCDC12,KHSRP,PTOV1,FLCN,CCAR2,AUP1,SQSTM1,CALR,MAP3K6,CBR1,NANS,CEP170B,PFAS,PFKL,PHB,DDA1,RPL36,POLRMT,PARS2,SLC25A10,KEAP1,DDOST,DFFA,TMEM160,SLC25A22,MAP1S,DDX39A,RPA2,RBFA,HGH1,PI4K2A,FKBP4,FKBP5,RTL6,SHMT2,CCT7,MON1B,TRABD,NUDC,MAST3,WDTC1,ATG2A,UNC45A,STK11,MLST8,GCN1,SLC27A4,OBSL1,CDC37,TKT,HADH,GABARAPL2,ATG101,WARS,DIABLO,TWNK,MRPL38,MLF2,LLGL1,LMNA
Pubmed	15302935	Large-scale characterization of HeLa cell nuclear phosphoproteins.	Pubmed	1.092E-15	1.570E-10	1.354E-12	1.686E-11	93	773	MATK,MCM2,GPRIN1,TRRAP,REXO1,BAP1,MN1,GIT1,FHOD1,CCAR2,IRS2,EIF3B,SRSF9,NOTCH2,H1FX,PCBP1,LRWD1,RCC1,CHD3,SLC9A3R2,SCAF1,CACTIN,SLC9A3R1,CPSF1,PLCB3,PLEC,S100A16,MINK1,PITPNM1,NCOR2,TBC1D10B,SEC24C,SOGA1,PRKCD,MAP2K2,CCDC9,DAXX,DBN1,DMWD,RANGAP1,SAMD4B,SAP30L,TSSC4,RFX1,EEF1B2,EEF2,PDIA6,MAP1S,TRIM28,NR2F6,RPLP0,STUB1,RPS3,ESRRA,PI4K2A,FAM53C,ZBTB7A,FASN,DDX41,FKBP5,FLII,MYBBP1A,SGTA,FOSL2,NSUN5,…
Pubmed	18457437	Identification of intracellular proteins associated with the EBV-encoded nuclear antigen 5 using an efficient TAP procedure and FT-ICR mass spectrometry.	Pubmed	1.355E-15	1.948E-10	1.665E-12	2.074E-11	36	151	SLC25A5,EIF3B,H1FX,CAD,PCBP1,PYCR2,TMED9,PSMB6,PTBP1,RPL7A,RPL8,RPL11,RPL18,RPL27A,RPL31,STUB1,RPS2,RPS4X,RPS8,RPS9,RPS15,RPS16,RPS23,TUBA1B,HAX1,SEC13,TUBB,GRPEL1,TIMM50,SNRPA,SNRPD2,RUVBL2,GCN1,HSPA5,HSPB1,MLF2
Pubmed	12962325	Characterization and analysis of posttranslational modifications of the human large cytoplasmic ribosomal subunit proteins by mass spectrometry and Edman sequencing.	Pubmed	1.543E-15	2.218E-10	1.864E-12	2.322E-11	21	48	RPL10A,RPL36,RPL3,RPL6,RPL7A,RPL8,RPL11,RPL15,RPL18,RPL27,RPL27A,RPL28,RPL31,RPL35A,RPL37,RPL37A,RPL39,RPL41,RPLP0,RPLP1,RPLP2
Pubmed	14567916	Regulated release of L13a from the 60S ribosomal subunit as a mechanism of transcript-specific translational control.	Pubmed	1.543E-15	2.218E-10	1.864E-12	2.322E-11	21	48	RPL10A,RPL36,RPL3,RPL6,RPL7A,RPL8,RPL11,RPL15,RPL18,RPL27,RPL27A,RPL28,RPL31,RPL35A,RPL37,RPL37A,RPL39,RPL41,RPLP0,RPLP1,RPLP2
Pubmed	20412781	Resolution of cell fate decisions revealed by single-cell gene expression analysis from zygote to blastocyst.	Pubmed	2.292E-15	3.297E-10	2.747E-12	3.421E-11	90	744	MAFG,MLLT6,MNT,KLF15,JRK,ATF4,LDB1,NFE2L1,NFKBIA,EIF2B2,ZNF598,CTDSP1,PBX2,ABT1,CHD3,TFCP2L1,PLXNA1,MIER2,ZNF385A,ATF6B,SOX13,CSRP2,KDM4A,CTNNB1,TES,ZMIZ2,OLIG1,ROGDI,TSC22D3,RFX1,RFX2,CTDSP2,ZNF710,ZNF668,TRIM28,KLHL26,ZNF219,ETV3,CXXC1,RXRA,HMG20B,KLF2,CITED2,ZBTB7A,HES6,FOSB,FOSL2,ZDHHC7,DRAP1,ZNF446,MXD4,LIMS2,PIAS4,ARFGAP2,KLF13,SMARCB1,HOPX,SREBF1,SRF,RNF114,CIC,STAT3,ZCCHC14,ZGPAT,THAP7,ZC…
Pubmed	24337577	Protein interaction screening for the ankyrin repeats and suppressor of cytokine signaling (SOCS) box (ASB) family identify Asb11 as a novel endoplasmic reticulum resident ubiquitin ligase.	Pubmed	2.879E-15	4.141E-10	3.422E-12	4.262E-11	41	198	HIST1H4A,MIF,SLC25A5,ANXA2,BSG,NOTCH2,CKB,SLC25A3,ASB6,PSMC3,DDOST,HSPB8,RAN,ENO2,RPL15,RPL35A,STUB1,RPS10,RPS16,TUBA1B,TUBB4B,FARSA,TUBB,CCT7,HIF1AN,SLC25A1,FTH1,GALK1,GCN1,ELOB,TLN1,HSD17B10,DNPEP,TUBB2A,TUFM,UBC,HSPA1A,HSPB1,VIM,TUBB2B,SLIRP
Pubmed	9811942	Genome-wide mapping of unselected transcripts from extraembryonic tissue of 7.5-day mouse embryos reveals enrichment in the t-complex and under-representation on the X chromosome.	Pubmed	3.024E-15	4.349E-10	3.565E-12	4.439E-11	44	226	CLPP,MDH2,MBD6,EIF3B,ATP5PO,CDS2,NFE2L1,RRP9,YIPF3,COMT,RANGAP1,SLC35C2,NUBP2,EEF2,ENO1,RPL6,RPL28,RPL37A,RPLP0,RPS15,TUBA1B,CHERP,SLC2A1,BEX3,GNB5,FTL,SPARC,MAPK8IP3,MYDGF,PRPF19,TAPBP,SIN3B,GSN,TKT,MEPCE,HADH,UBC,HSPA5,ID1,EXOSC5,ITGB4,AGTRAP,RPSA,LCAT
Pubmed	9110174	Large-scale concatenation cDNA sequencing.	Pubmed	3.331E-15	4.790E-10	3.895E-12	4.850E-11	75	563	ASPHD1,ACAA1,SLC12A5,PTOV1,SAMD14,HYAL2,EIF2B2,CACNA1H,BAIAP3,CAMK2B,CAPNS1,CACTIN,TMCO1,PLTP,MAPK8IP1,NECAB2,TP53I11,TBC1D10B,LRP10,CSK,CSNK1G2,TMEM94,TSC22D3,SEZ6L2,ARPC1B,MRPL4,PDIA6,RNF41,BSCL2,NAGPA,ENO1,RPL15,PI4K2A,RXRA,RAPGEF3,SEC13,AGPAT1,TUBB,BTBD2,SLC2A1,CNPPD1,GRPEL1,MAP7D1,TRAPPC3,FAM189B,RNF114,AHDC1,CSDC2,RUNDC3A,ACSBG1,EHD1,KAZN,TAPBP,OBSL1,GRN,CDH22,KANK3,MAPK8IP2,UBC,HPCAL1,PRMT…
Pubmed	19423573	A protein interaction network for the large conductance Ca(2+)-activated K(+) channel in the mouse cochlea.	Pubmed	5.442E-15	7.826E-10	6.312E-12	7.860E-11	35	149	MDH2,AK1,ALAD,ALDOA,APOE,PDXK,EIF3F,CALR,PEBP1,RAB11B,COL1A2,CTBP1,PSMA7,PHGDH,ENO1,ENO2,SDHB,VAT1,ISYNA1,TUBB,NUDC,SPARC,SPR,GFAP,TAGLN,TKT,TPT1,PARK7,HPCAL1,UCHL1,HSPA5,VIM,YWHAG,LMNA,RCN3
Pubmed	10591208	The DNA sequence of human chromosome 22.	Pubmed	5.572E-15	8.014E-10	6.411E-12	7.985E-11	51	299	ELFN2,MFNG,ADSL,MPST,ATF4,MYH9,NDUFA6,SNU13,UQCR10,TXN2,PMM1,NOL12,GTPBP1,CRYBB1,CELSR1,GGA1,RANGAP1,DNAL4,TBC1D10A,RPL3,ANKRD54,FBLN1,SBF1,POLDIP3,PRR5,PEX26,TRMT2A,TRABD,PNPLA3,INPP5J,CYTH4,TOB2,SREBF2,CSDC2,GGT5,TTLL12,MLC1,RRP7A,TRIOBP,CDC42EP1,MAPK8IP2,RASD2,PATZ1,TST,PLXNB2,PIK3IP1,SDF2L1,PANX2,TFIP11,HPS4,LIMK2
Pubmed	8619474	A "double adaptor" method for improved shotgun library construction.	Pubmed	5.868E-15	8.440E-10	6.698E-12	8.341E-11	75	569	ASPHD1,ACAA1,SLC12A5,PTOV1,SAMD14,HYAL2,EIF2B2,CACNA1H,BAIAP3,CAMK2B,CAPNS1,CACTIN,TMCO1,PLTP,MAPK8IP1,NECAB2,TP53I11,TBC1D10B,LRP10,CSK,CSNK1G2,TMEM94,TSC22D3,SEZ6L2,ARPC1B,MRPL4,PDIA6,RNF41,BSCL2,NAGPA,ENO1,PI4K2A,RXRA,TAX1BP3,RAPGEF3,SEC13,AGPAT1,TUBB,BTBD2,SLC2A1,CNPPD1,GRPEL1,MAP7D1,TRAPPC3,FAM189B,ITFG2,RNF114,AHDC1,CSDC2,RUNDC3A,ACSBG1,EHD1,KAZN,TAPBP,OBSL1,GRN,CDH22,KANK3,MAPK8IP2,UBC,HPC…
Pubmed	18614564	Proteomics analysis identifies phosphorylation-dependent alpha-synuclein protein interactions.	Pubmed	6.181E-15	8.889E-10	6.999E-12	8.717E-11	36	158	AP2A1,CASKIN1,ALDOA,ATP6V1B2,NDUFA2,NDUFA6,NDUFA8,NDUFB6,NDUFB7,NDUFB8,NDUFB10,NDUFV1,NDUFS8,CAMK2B,UQCR10,PHB,SLC25A3,CNP,NDUFB11,DYNLL2,CTNNB1,NDUFS7,SLC25A22,RPS10,AGAP2,POLDIP3,TUBB,MAP7D1,UQCRQ,BRSK1,NDUFA12,SRCIN1,UQCRC1,HSPA5,YWHAG,NDUFA11
Pubmed	23125841	Characterization of staufen1 ribonucleoproteins by mass spectrometry and biochemical analyses reveal the presence of diverse host proteins associated with human immunodeficiency virus type 1.	Pubmed	7.362E-15	1.059E-9	8.272E-12	1.030E-10	45	241	SLC25A5,KHSRP,ARF5,ARF6,EIF3B,ATP5PO,CAD,SERPINH1,PCBP1,PFKL,SRPRB,PHB,CPSF1,EIF4A3,PSMD3,DDOST,RAN,UPF1,TRIM28,ENO1,RPL3,RPL6,RPL7A,RPL8,RPL18,SF3B4,RPLP0,RPS2,RPS3,RPS4X,RPS8,RPS9,FASN,RACK1,CDIPT,MYBBP1A,TUBB,KIF1C,GCN1,HSPA1A,HSPA1B,HSPA5,VIM,DDX39B,LYZ
Pubmed	26693507	The dynamic interactome of human Aha1 upon Y223 phosphorylation.	Pubmed	7.658E-15	1.101E-9	8.537E-12	1.063E-10	28	96	MCM2,ALDOA,EIF3B,PSMD3,TRIM28,ENO1,RPL6,RPL11,RPL31,RPS2,RPS3,RPS4X,RPS10,RPS15,RPS15A,RPS16,RPS20,RPS23,FASN,FAU,EIF3L,AHSA1,PRPF19,TUBB2A,HSPA1A,HSPA5,VIM,IMPDH2
Pubmed	11875025	The human ribosomal protein genes: sequencing and comparative analysis of 73 genes.	Pubmed	1.100E-14	1.582E-9	1.217E-11	1.515E-10	21	52	RPL36,RPL8,RPL15,RPL18,RPL27,RPL31,RPL35A,RPL37,RPL39,RPLP1,RPLP2,RPS3,RPS5,RPS9,RPS12,RPS16,RPS20,RPS21,RPS27A,RPS28,RPS29
Pubmed	17634366	Proteolipid protein is required for transport of sirtuin 2 into CNS myelin.	Pubmed	1.151E-14	1.656E-9	1.261E-11	1.571E-10	36	161	MDH2,MIF,ALDOA,SLC25A5,ARF6,ATP1A3,ATP6V1B2,ATP5PO,NME2,CLDN11,PEBP1,PHB,CKB,SLC25A3,CNP,PHGDH,MYH14,ENO1,ENO2,RPS27A,TUBA1B,TUBB4B,GNB5,FSCN1,SOD1,GFAP,EHD1,TKT,HBA2,IGSF8,TUFM,UBC,UCHL1,UQCRC1,HSPA5,YWHAG
Pubmed	15461802	A genome annotation-driven approach to cloning the human ORFeome.	Pubmed	1.158E-14	1.665E-9	1.261E-11	1.571E-10	50	294	ADORA2A,MFNG,ADSL,MIF,MN1,MPST,ATF4,MYH9,NDUFA6,SNU13,LMF2,TXN2,PMM1,COMT,NOL12,GTPBP1,CRYBB1,GGA1,SCO2,RANGAP1,TBC1D10A,RPL3,ANKRD54,EIF3L,RTL6,POLDIP3,PEX26,SLC7A4,TRMT2A,SMARCB1,PNPLA3,CYTH4,TOB2,SREBF2,CSDC2,GGT5,TTLL12,MLC1,NFAM1,THAP7,CDC42EP1,RASD2,PATZ1,TST,PIK3IP1,SDF2L1,PANX2,TFIP11,HPS4,LIMK2
Pubmed	22174317	Host cell interactome of HIV-1 Rev includes RNA helicases involved in multiple facets of virus production.	Pubmed	1.202E-14	1.729E-9	1.300E-11	1.619E-10	41	206	HIST1H2BC,HIST1H4A,EIF3I,SRSF9,CALR,PFKL,PLOD1,THOC6,NOP9,RAN,RANGAP1,DAZAP1,RPL3,RPL6,RPL27,RPL35A,RPS2,RPS4X,RPS5,RPS23,RPS27A,TUBA1B,TUBB4B,FAU,RACK1,EMG1,MYBBP1A,TUBB,PDCD11,H2AFJ,SNRNP70,SNRPG,SRP54,PRPF19,HIST1H2BB,TUBB2A,TOE1,TUBB2B,EXOSC5,RPSA,SF3A2
Pubmed	26871637	Widespread Expansion of Protein Interaction Capabilities by Alternative Splicing.	Pubmed	1.379E-14	1.983E-9	1.480E-11	1.843E-10	78	615	MIF4GD,AKT1,BMF,CBX4,APOE,PDLIM4,ARHGDIA,ASL,FLCN,ATF4,BAD,HGS,PCK2,ADGRG1,RCC1,CKB,SLC25A3,PYCR2,HOMER3,COL1A2,MPDU1,CRH,RIN1,TRAF4,SLC25A10,PRKCSH,MAPK7,REM2,UCK1,PTBP1,ZMIZ2,PEX5,VPS37B,DAZAP1,BSCL2,CWF19L1,SF3B4,STUB1,VPS52,FGFR1,HAX1,AMOTL2,TADA3,SDHC,SGTA,ASAP3,SHMT2,PEX26,RBCK1,LMBR1L,TRIM32,GAD1,ITFG2,ALDH1L1,GFAP,STK11,ZGPAT,EHMT2,SURF1,TAP1,TNS2,TGFBI,TKT,HSD17B10,SMUG1,PRMT2,UMPS,VASP,…
Pubmed	28378594	Expanding the Interactome of TES by Exploiting TES Modules with Different Subcellular Localizations.	Pubmed	1.547E-14	2.225E-9	1.648E-11	2.052E-10	44	236	DBNL,EIF3I,ATP5F1E,MYL6,SQSTM1,EIF2B4,CAD,PCK2,SRPRB,PLEC,CNN2,RIN1,CSRP2,CTNNB1,TES,PSMD3,DBN1,DCTN1,IPO4,TRIM28,EPHA2,HGH1,RPS21,TUBA1B,TUBB4B,HAX1,TUBB,CCT7,AHSA1,SLC1A5,FSCN1,SRP54,UNC45A,STAT3,GCN1,LIMD2,TKT,TLN1,TUBB2A,TUFM,VASP,HSPB1,VIM,BAG6
Pubmed	9798653	Expressed genes in interleukin-4 treated B cells identified by cDNA representational difference analysis.	Pubmed	1.596E-14	2.295E-9	1.687E-11	2.101E-10	18	37	MCM2,ALAD,MYH9,TBRG4,KEAP1,IPO4,EEF2,RPL3,RPLP0,RPS2,RPS3,TUBA1B,FASN,COPE,HSPA5,IMPDH2,UNC93B1,PNPLA2
Pubmed	24189400	Perturbation of the mutated EGFR interactome identifies vulnerabilities and resistance mechanisms.	Pubmed	1.641E-14	2.359E-9	1.722E-11	2.145E-10	46	256	AP2A1,AP2A2,SLC25A5,ANXA2,SPTBN4,EIF3B,ATP2A3,MYH9,BCR,SQSTM1,H1FX,DDR1,PHB,SLC25A3,AP2S1,PIK3R2,S100A16,PRKCSH,CTNNB1,PTPRF,PDIA6,RPS2,RPS3,RPS15,RPS16,RPS27A,TUBA1B,THEM6,BAIAP2,PHLDA1,TUBB,SLC25A1,TIMM50,GFAP,STAT3,CDC37,HBB,HLA-A,TUFM,DNAJB2,HSPA1A,HSPA5,HSPB1,ITGB4,LGALS3BP,SLIRP
Pubmed	26336360	Beads-free protein immunoprecipitation for a mass spectrometry-based interactome and posttranslational modifications analysis.	Pubmed	2.405E-14	3.459E-9	2.507E-11	3.122E-10	35	156	KHSRP,BYSL,SNU13,RRP9,PCBP1,EIF4A3,PHGDH,RAC3,RNH1,TRIM28,MRTO4,DDX39A,RPL3,RPL6,RPL8,RPL11,RPL15,RPL18,RPL28,RPL31,RPL35A,RPS8,RPS9,RPS26,TUBA1B,TUBB4B,EMG1,TUBB,PDCD11,RRP12,PRPF19,RPUSD4,U2AF2,PRMT1,DDX39B
Pubmed	28190767	An Interaction Landscape of Ubiquitin Signaling.	Pubmed	3.268E-14	4.701E-9	3.382E-11	4.212E-10	65	468	AP2A1,AP2A2,AK1,AMFR,NDUFS8,BSG,SQSTM1,SLC5A6,HAP1,HGS,SRPRB,AP2S1,PLEC,TMCO1,EPN1,TRAF4,KLHDC3,CAVIN1,GGA1,MLEC,PSMC3,PSMD3,PSMD4,KEAP1,SPATA2,TMEM160,MVP,TMEM120A,FBXO31,TNK2,ANKRD13B,RPS3,SDC4,SSSCA1,BTBD2,RNF126,TBL3,RBCK1,RNF123,TRIM32,NEURL4,CAPN15,AGO2,USP19,TAPBP,ALG1,ADRM1,PATZ1,GABARAPL2,UBC,RTL8B,UCHL1,SDF2L1,PRMT1,HSPE1,HSPG2,TMEM201,WARS,MIB2,ZFAND2B,ITPR3,BAG6,PYCR3,USP5,LLGL1
Pubmed	25957688	Structural snapshots of actively translating human ribosomes.	Pubmed	3.391E-14	4.877E-9	3.484E-11	4.338E-10	14	21	RPL10A,RPL36,RPL6,RPL8,RPL11,RPL18,RPL31,RPL39,RPL41,RPS21,RPS23,RPS26,RPS28,RPS29
Pubmed	16196087	Large-scale analysis of the human ubiquitin-related proteome.	Pubmed	3.657E-14	5.259E-9	3.730E-11	4.645E-10	51	313	ADSL,EIF3F,ATP5PO,CBS,PHB,COX5B,POLR1C,AAR2,PSMA7,PSMB5,PSMB6,PSMC3,PTBP1,PHGDH,GRWD1,TSC22D3,RFC2,MRPS7,EEF1B2,TRIM28,KCTD10,RPL28,RPLP0,RPLP2,FBL,RPS8,RPS12,MRPL27,RPS20,FARSA,HAX1,SGTA,PPP6R1,RNF126,GET4,TRABD,TIMM50,PCID2,CYB5R1,AGO2,RNF114,RUVBL2,NCDN,PRPF19,HLA-A,COPE,TUFM,UBC,UQCRC1,HSPB1,MLF2
Pubmed	16452087	Comprehensive identification of phosphorylation sites in postsynaptic density preparations.	Pubmed	4.651E-14	6.689E-9	4.710E-11	5.866E-10	41	214	LMTK3,GPRIN1,ELFN2,CASKIN1,BEGAIN,PPFIA3,PDLIM4,EIF3B,MYH9,RPL10A,CACNB1,CAMK2B,CEP170B,ARHGAP33,HOMER3,C2CD2L,EEF2,RPL7A,RPL8,RPL31,RPL37,STUB1,RPLP2,RPS2,SPEG,RPS9,RPS20,RPS21,RPS23,AGAP2,DLGAP4,MAST3,GFAP,MAPK8IP3,PRRT3,PRRC2B,GPC1,SRCIN1,LMNB2,GJC2,LMNA
Pubmed	25036637	A quantitative chaperone interaction network reveals the architecture of cellular protein homeostasis pathways.	Pubmed	4.950E-14	7.119E-9	4.978E-11	6.200E-10	52	326	MCM2,FUOM,NME2,AIP,SERPINH1,PIK3R2,EPN1,POLR2E,PPP5C,SEC24C,PSMD4,KEAP1,PHGDH,PIH1D1,HSPB8,RARG,UPF1,ROM1,RNF41,ENDOG,STUB1,HGH1,TUBA1B,FKBP4,FKBP5,HYOU1,SGTA,AHSA1,GET4,TIMM50,NUDC,LSM7,AGO2,UNC45A,RUVBL2,USP19,STK11,PHLDB1,CDC37,NISCH,SCRIB,COPE,EDC4,FKBP8,HSF4,HSPA1B,HSPB1,YWHAG,PDRG1,BAG6,PNPLA2,MLF2
Pubmed	23798571	Novel, gel-free proteomics approach identifies RNF5 and JAMP as modulators of GPCR stability.	Pubmed	5.397E-14	7.762E-9	5.390E-11	6.713E-10	35	160	AMFR,SLC25A5,ATP5PO,NDUFV1,CAPNS1,SERPINH1,PCBP1,SRPRB,PHB,SLC25A3,SLC9A3R2,SLC25A10,PSMC3,SV2A,RAN,CNNM3,EEF1B2,EEF2,PDIA6,RPLP1,MRPL12,RPS5,RACK1,TUBB,SHMT2,SLC1A5,TIMM50,TUBB2A,TUFM,UBC,FKBP8,HSPA1A,HSPA1B,HSPA5,SLIRP
Pubmed	26460568	Kelch Domain of Gigaxonin Interacts with Intermediate Filament Proteins Affected in Giant Axonal Neuropathy.	Pubmed	5.555E-14	7.989E-9	5.510E-11	6.861E-10	38	187	TRRAP,SLC25A5,EIF3B,EIF3I,CACNA1H,PLEC,PLXNA1,CROCC,GPR101,EEF2,MYH14,RPL8,RPLP0,RPS2,RPS3,RPS4X,RPS5,RPS8,RPS9,RPS10,RPS27A,TUBA1B,TUBB4B,RACK1,EIF3L,SCN5A,TUBB,CCT7,SPTB,PHLDB1,LMNB2,PRMT1,HSPA1A,IGSF3,VIM,TUBB2B,KIFC3,RPSA
Pubmed	17620599	Functional specialization of beta-arrestin interactions revealed by proteomic analysis.	Pubmed	6.119E-14	8.800E-9	6.027E-11	7.506E-10	51	317	AP2A1,AP2A2,ANXA2,APLP1,EIF3I,MYH9,MYL6,H1FX,CLIC1,PIK3R2,RPL36,POLR2E,POLR1C,KIF26A,DBN1,PTBP1,RANGAP1,EEF2,TRIM28,RPL3,RPL6,RPL7A,RPL11,RPL15,RPL18,RPL28,RPL31,RPL35A,RPLP0,RPLP1,RPLP2,FBL,RPS2,RPS3,RPS4X,RPS8,RPS27A,TUBB4B,FASN,TUBB,SNRPD2,HDGFL2,GSN,TUBB2A,UBC,PRMT1,HSPA1B,HSPA5,VIM,YWHAG,BOLA2
Pubmed	23341629	Inactivation of the microRNA-183/96/182 cluster results in syndromic retinal degeneration.	Pubmed	6.345E-14	9.126E-9	6.208E-11	7.731E-10	39	197	RSPH9,DOC2B,TMEM176B,ENC1,PDLIM4,VAMP8,C1QC,C4B,TMEM86A,CBR3,SLC9A3R1,FXYD1,CRYM,DLG4,RARRES2,SEZ6,RPS10,TMEM176A,TAX1BP3,ISYNA1,ARHGEF40,SLC12A4,SLC19A1,SSBP4,SLC39A1,GFAP,USP20,KAZN,SLC27A4,TTYH3,TMBIM6,THRA,TNFRSF1A,VIM,KIFC3,ADSSL1,RILPL2,LGALS3BP,LYZ
Pubmed	11230166	Toward a catalog of human genes and proteins: sequencing and analysis of 500 novel complete protein coding human cDNAs.	Pubmed	7.551E-14	1.086E-8	7.338E-11	9.138E-10	87	750	AP2A1,PREX1,MPP2,MRPL15,CCAR2,FXYD6,NDUFB8,BAIAP3,TMED4,ENTPD6,CRELD1,CAMKV,PLXNA1,YIPF3,DDIT4,RPL36,SPEF1,RETREG2,SYF2,AAR2,NSMF,CCDC9,SLC36A1,DBN1,TMEM130,COMMD4,SV2A,ZMIZ2,INTS11,CHPF,MUL1,HSPB8,FAM57B,EGLN2,ROGDI,TSC22D3,FBXO31,IER3IP1,ELN,STK40,ENO1,IMP3,SPRY2,FAM234A,ABI3,PLPPR3,COA4,TMEM222,PLEKHN1,CXXC1,ENKD1,NRSN2,TOMM40L,TADA3,HPCAL4,FKBP5,MYBBP1A,RTL6,CAMKK1,SGTA,ATP5MG,RNF123,GNB5,SAY…
Pubmed	19322201	Ubiquitin-mediated proteolysis of HuR by heat shock.	Pubmed	8.227E-14	1.183E-8	7.941E-11	9.890E-10	152	1671	H2AFV,ACACB,MBD6,REXO1,LRRC47,AES,MLLT6,NLGN2,MNT,AMFR,GIT1,RANBP3,HCN3,MBD3,PDXK,ARF3,KHSRP,ARF5,RHOB,GLIPR2,IRS2,SLC41A1,SRSF9,HRK,AXL,PXDC1,CCND1,CALR,SERPINH1,TMED4,FURIN,PBX2,PCBP1,SRPRB,TBCB,ASB6,DDA1,PIM1,TMCO1,CNN2,UBQLN2,TNPO2,THOC6,PPP4C,CSK,CTBP1,CAVIN1,RASL10B,SZRD1,TES,MLEC,SPATA2,DLG4,LAMTOR1,RAN,SH2B3,TSC22D3,SAMD4B,DVL2,ISOC1,FRMD8,MRPS16,EXOC8,CNNM3,TLNRD1,ZNF668,DAZAP1,APH1A,EPH…
Pubmed	22145905	A cohesin-RAD21 interactome.	Pubmed	8.300E-14	1.194E-8	7.958E-11	9.910E-10	40	208	MCM2,HIST1H4I,HIST1H4A,HIST1H4D,HIST1H4F,HIST1H4C,HIST1H4H,CCAR2,EIF3B,EIF3F,EIF3I,CAD,CBR1,CDC34,PFKL,GTPBP1,CSTB,DAPK3,RAN,RPL6,RPL11,RPL35A,RPS2,RPS3,RPS4X,RPS5,RPS10,RPS15A,RPS16,RPS20,RPS27A,TUBB4B,FASN,FEN1,CCT7,RNF123,H2AFJ,GNL1,PPP1R15A,UBC
Pubmed	23184937	Deubiquitinase FAM/USP9X interacts with the E3 ubiquitin ligase SMURF1 protein and protects it from ligase activity-dependent self-degradation.	Pubmed	9.879E-14	1.421E-8	9.347E-11	1.164E-9	36	172	SLC25A5,EIF3B,BYSL,SLC25A3,DCTN1,EEF1B2,EEF2,PDIA6,TRIM28,RPL31,RPS3,RPS4X,RPS5,RPS8,RPS9,RPS10,RPS12,RPS15,RPS15A,RPS16,RPS20,TUBB4B,FASN,TUBB,CCT7,TIMM50,SNRPA,SNRPD2,CMBL,TUFM,UBC,PRMT1,HSPA1A,HSPA1B,HSPA5,VIM
Pubmed	27375898	HIV-host interactome revealed directly from infected cells.	Pubmed	9.879E-14	1.421E-8	9.347E-11	1.164E-9	36	172	CCAR2,NOTCH1,CAD,PFAS,PLOD1,POR,QPCTL,PSMC3,TAPBPL,PDIA6,RNH1,EGFL7,FASN,HYOU1,TM9SF1,CCT7,ERGIC3,SLIT1,GART,RUVBL2,LMAN2,ERP29,TAP2,TAPBP,ELOB,CARMIL2,THBS3,HLA-E,TUFM,SDF2L1,HSPA1A,HSPA5,HSPB1,IMPDH2,BAG6,PBXIP1
Pubmed	29053956	Assembly of the WHIP-TRIM14-PPP6C Mitochondrial Complex Promotes RIG-I-Mediated Antiviral Signaling.	Pubmed	1.042E-13	1.499E-8	9.798E-11	1.220E-9	52	332	KHSRP,MYH9,BAX,SERPINH1,PYCR2,COX5B,AAR2,CSRP2,SLC25A10,PSMB5,PSMB6,PSMC3,PSMD3,PSMD4,DBN1,LAMTOR1,RAN,RANGAP1,PDIA6,RNH1,ENO1,RPL27A,RPL31,RPL35A,SF3B4,STUB1,HGH1,RPS15,HAX1,FLII,ISYNA1,NPC2,AHSA1,SLC1A5,SMARCB1,H2AFJ,SNRPD2,UNC45A,PRPF19,ELOB,PIM2,CDC37,HSD17B10,SMIM3,TUBB2A,HSPB1,VIM,JUP,BAG6,PYCR3,AGTRAP,MLF2
Pubmed	11780052	The DNA sequence and comparative analysis of human chromosome 20.	Pubmed	1.206E-13	1.735E-8	1.126E-10	1.403E-9	68	517	SLC12A5,PREX1,COL20A1,ATP5F1E,CDS2,MATN4,NFATC2,NNAT,ENTPD6,PDYN,GDAP1L1,SMOX,PLTP,SPEF1,AAR2,SLC32A1,CBLN4,NKAIN4,SOGA1,VSTM2L,CST3,FITM2,ROMO1,LZTS3,PSMA7,FAM110A,SPATA2,UCKL1,PYGB,MAFB,ACOT8,SLC35C2,TSPY26P,ATP9A,NPEPL1,ARFRP1,RPL41,ACTR5,RPS21,HSPA12B,NRSN2,SDC4,DLGAP4,RBCK1,ERGIC3,MANBAL,ZNF335,COMMD7,PCIF1,LSM14B,SNTA1,RNF114,SSTR4,PARD6B,ZGPAT,BLCAP,ADRM1,OGFR,TGM2,THBD,CDH22,HRH3,ID1,SLC1…
Pubmed	26170170	RC3H1 post-transcriptionally regulates A20 mRNA and modulates the activity of the IKK/NF-?B pathway.	Pubmed	1.379E-13	1.983E-8	1.280E-10	1.594E-9	34	156	SLC25A5,CCDC124,CCAR2,EIF3I,EDF1,CAD,SLC25A3,PSMC3,PHGDH,RAN,TRIM28,RPL8,RPL11,RPL18,RPL27A,RPL28,FBL,RPS2,RPS3,RPS5,RPS8,RPS10,RPS15A,RPS16,RPS20,FARSA,FAU,SNRPD2,RCC2,ZC3H4,GCN1,HSPA5,VIM,MRPL14
Pubmed	9371744	Genetic mapping of 262 loci derived from expressed sequences in a murine interspecific cross using single-strand conformational polymorphism analysis.	Pubmed	2.425E-13	3.488E-8	2.236E-10	2.784E-9	39	205	MPP2,AKR7A2,NDUFV1,CDK5R1,AIP,PEBP1,NDUFB11,SYF2,CST3,PRKCSH,PSMD4,PTBP1,CANT1,ZMIZ2,CHPF,EGLN2,RELB,SGSM1,SPEG,TUBA1B,RACK1,CDIPT,CX3CL1,TUBB,UQCRQ,FSCN1,KIF1C,DDN,GP1BB,GRN,LMNB2,TIMP2,PLXNB2,TUBB2A,PRMT1,UQCRC1,YWHAG,DNLZ,BTG2
Pubmed	12611891	The subunit composition of the human NADH dehydrogenase obtained by rapid one-step immunopurification.	Pubmed	2.529E-13	3.637E-8	2.317E-10	2.885E-9	18	42	NDUFA1,NDUFA2,NDUFA3,NDUFA6,NDUFA8,NDUFB2,NDUFB6,NDUFB7,NDUFB8,NDUFB10,NDUFV1,NDUFS6,NDUFS8,NDUFV3,NDUFB11,NDUFS7,NDUFA12,NDUFA11
Pubmed	20186120	A functional peptidyl-tRNA hydrolase, ICT1, has been recruited into the human mitochondrial ribosome.	Pubmed	3.352E-13	4.820E-8	3.051E-10	3.799E-9	39	207	ACADVL,ALDH2,SLC25A5,GADD45GIP1,MRPL15,NDUFV1,NDUFS8,PHB,SLC25A3,PYCR2,NDUFAF3,POLRMT,PARS2,SLC25A10,MRPS16,ECH1,MRPS18A,MRPL4,MRPS7,MTG1,MRPL12,MRPL27,SHMT2,MRPL28,MRPL17,ATP5MG,GRPEL1,SLC25A1,RPUSD3,HSD17B10,TUFM,UQCRC1,TWNK,MRPL14,MRPS24,MRPL9,COQ8A,VARS2,SLIRP
Pubmed	26514267	Protein interactome mining defines melatonin MT1 receptors as integral component of presynaptic protein complexes of neurons.	Pubmed	3.395E-13	4.882E-8	3.071E-10	3.824E-9	50	320	ADCY3,DISP3,AK1,ATP1A3,ATP5MC3,CALR,CRELD1,COL9A2,UBQLN2,COMT,CRYM,INTS1,PYGB,IPO4,TMX2,PDIA6,RNF41,ENO2,RPL3,TUBA1B,RACK1,AMOTL2,TRIM46,TM9SF1,TUBB,ASAP3,PPP6R1,SLC12A4,SLIT1,CIAO2B,FTL,SREBF1,SREBF2,GFAP,SURF4,GNAI2,THRA,TLN1,UCHL1,HSPA5,HSPB1,CLIP2,IMPDH2,ITGB4,ITPR3,ITM2C,BAG6,DLL1,USP5,LRP3
Pubmed	23383273	VCP phosphorylation-dependent interaction partners prevent apoptosis in Helicobacter pylori-infected gastric epithelial cells.	Pubmed	3.431E-13	4.935E-8	3.084E-10	3.841E-9	47	288	AP2A2,AKT1,AMFR,ANXA2,ARF6,FHOD1,BAD,BAX,BSG,NFKBIA,NME2,HIP1R,CCNB1,CDKN1A,RAB11B,PIK3R2,PLEC,COMT,TBC1D10B,CSK,GGA1,PDCD6,RPL6,RPS9,CCT7,RNF126,ARFGAP2,GET4,H2AFJ,NCDN,RRP12,LMNB2,CDC42EP1,CDC37,INF2,CDC42EP4,COPE,COMMD1,HSPA1A,HSPA5,HSPB1,VIM,HSPE1,YWHAG,COQ8A,BAG6,LMNA
Pubmed	24657165	Transcriptional repressor ZBTB1 promotes chromatin remodeling and translesion DNA synthesis.	Pubmed	4.298E-13	6.181E-8	3.839E-10	4.781E-9	24	81	CCAR2,SLC25A3,TRIM28,RPL3,RPL8,RPL11,RPL18,RPL27,RPL27A,RPLP0,RPS4X,RPS8,RPS9,RPS15A,RPS16,RPS23,RPS29,TUBA1B,TUBB4B,TUBB,UBC,HSPB1,TWNK,RPSA
Pubmed	22304920	PKC? promotes oncogenic functions of ATF2 in the nucleus while blocking its apoptotic function at mitochondria.	Pubmed	4.556E-13	6.553E-8	4.020E-10	5.007E-9	31	136	ACADVL,MDH2,ALDOA,RHOC,ATP2A3,ATP5PO,BSG,CALR,SERPINH1,PCBP1,PHB,CLIC1,CTNNB1,DDOST,EEF2,ENO1,TUBB,SHMT2,SLC2A1,GRPEL1,FSCN1,MYDGF,ERP29,GSTP1,UQCRC1,HSPB1,VIM,HSPE1,YWHAG,ITGB4,DDX39B
Pubmed	26752685	FIH Regulates Cellular Metabolism through Hydroxylation of the Deubiquitinase OTUB1.	Pubmed	4.556E-13	6.553E-8	4.020E-10	5.007E-9	31	136	MAZ,ADSL,SLC25A5,BSG,CAD,CBR1,CBS,CCNB1,PCBP1,PFAS,RCC1,SRPRB,SLC25A3,CSRP2,QPCTL,PHGDH,NOSIP,STUB1,SDHB,HIF1AN,SLC25A1,NUDC,RCC2,ERP29,SLC27A4,UBC,UBE2G2,HSPA1A,HSPA5,BAG6,AIMP2
Pubmed	26641092	The Activation-Induced Assembly of an RNA/Protein Interactome Centered on the Splicing Factor U2AF2 Regulates Gene Expression in Human CD4 T Cells.	Pubmed	4.876E-13	7.012E-8	4.274E-10	5.323E-9	42	239	MDH2,SLC25A5,ANXA2,KHSRP,ARHGDIA,SRSF9,CALR,PCBP1,PHB,SLC9A3R1,CLIC1,CNN2,EIF4A3,PTBP1,MVP,RAN,UPF1,ARPC1B,EEF2,PDIA6,TRIM28,FBL,RACK1,POLDIP3,SHMT2,H2AFJ,SNRNP70,PRPF19,GNAI2,CDC37,TKT,TLN1,PARK7,U2AF2,TUFM,HSPA1A,HSPA5,HSPE1,WARS,EIF4H,IMPDH2,DDX39B
Pubmed	14621295	Prediction of the coding sequences of mouse homologues of KIAA gene: III. the complete nucleotide sequences of 500 mouse KIAA-homologous cDNAs identified by screening of terminal sequences of cDNA clones randomly sampled from size-fractionated libraries.	Pubmed	4.904E-13	7.052E-8	4.274E-10	5.323E-9	66	508	ABCA2,MCM2,BAP1,LRRC47,CASKIN2,CASKIN1,IGSF9,DOCK6,PITPNM2,BCR,HIP1R,PALM,TBRG4,TAOK2,NRXN2,ANAPC2,PLXNB1,ADGRA2,CYHR1,IPO13,KDM4A,DHX34,MLEC,KIF26A,EIF4A3,PIEZO1,SNX17,KEAP1,RGP1,MRC2,KLHL21,AP5Z1,KBTBD11,RNF10,RANGAP1,NPEPL1,SBF1,AMOTL2,ACAP3,RNF44,BAHD1,PDCD11,FAIM2,MINDY1,AGO2,TRIM35,ATG2A,KDM6B,RCC2,DMAP1,STAB1,ACSBG1,ZC3H4,NBEAL2,BOP1,MGRN1,JADE2,TRIOBP,SRCIN1,INTS5,LRRC8A,IGSF3,FBF1,COQ8A,…
Pubmed	25544563	Global mapping of herpesvirus-host protein complexes reveals a transcription strategy for late genes.	Pubmed	5.167E-13	7.431E-8	4.476E-10	5.575E-9	68	533	H2AFV,WDR18,ADSL,OSBPL7,AMPD2,APEH,NDUFA3,NDUFB8,NDUFB10,NDUFV1,PIP4P1,NME2,ANKRD52,NOTCH2,CALR,TRIM41,FIBP,TBRG4,CHD3,PLOD1,TNPO2,COX5B,POLR2E,POLR2I,POLR2K,POLR2L,GTPBP1,TBC1D10B,CTBP1,PRKCSH,MAP2K2,DAXX,NOP9,EMC10,LAMTOR1,CHPF,BOLA1,MRPS18A,ARMC5,PANK4,RNF41,RPA2,FBL,ENKD1,VPS52,ZER1,SDHB,AGAP3,VAT1,NAGK,PPP6R1,P3H4,UQCRQ,FUCA1,SYVN1,NEURL4,AGO2,RCC2,NOMO1,CDC37,HLA-A,SDF2L1,PRMT1,UQCRC1,FKBP1…
Pubmed	11076863	DNA cloning using in vitro site-specific recombination.	Pubmed	7.084E-13	1.019E-7	6.100E-10	7.597E-9	88	794	FZD8,MAP3K10,ULK1,MRPL15,CCAR2,HRK,FXYD6,CCND1,HCN2,PIP4P1,C1QC,BAIAP3,CAMK2B,TMED4,ENTPD6,CDKN1A,PHB,CRELD1,GRHPR,YIPF3,DDIT4,RPL36,CXCL14,NCAN,SF3B5,ABHD11,SLC36A1,DBN1,TMEM130,SV2A,INTS11,QDPR,MUL1,FAM57B,EGLN2,ROGDI,FBXO31,ELN,STK40,ENO1,IMP3,HDAC11,SPRY2,FAM234A,ABI3,COA4,PLEKHN1,ENKD1,NRSN2,RACK1,TOMM40L,IFITM3,TADA3,HPCAL4,FKBP5,PTGES2,SGTA,ATP5MG,RNF123,GNB5,NUDC,CAPN15,USE1,HOPX,RUVBL2,S…
Pubmed	22939624	Quantitative analysis of HSP90-client interactions reveals principles of substrate recognition.	Pubmed	7.319E-13	1.053E-7	6.265E-10	7.803E-9	54	371	MAFG,MATK,ACVR2B,VPS18,ENC1,AXL,DDR1,CAMK2B,TRIM41,MAP3K6,DYRK1B,CAMKV,ASB6,ANAPC2,MINK1,FBXL14,PIM3,MAPK7,DAPK3,FBXO10,RNF10,DLX6,DMPK,RET,KLHL36,EPHA2,ARMC5,TNK2,KLHL26,NHLRC1,CXXC1,FBXL18,FES,FGFR1,FLT4,CAMKK1,KBTBD4,TRIM32,SREBF1,STK11,PRPF19,PIM2,GRK6,CDC37,HMGA1,TYRO3,ZBTB17,PAK6,KCNA5,KCNG1,CAMK1G,LGALS3BP,LIMK1,LIMK2
Pubmed	25640309	Systematic identification of molecular links between core and candidate genes in breast cancer.	Pubmed	9.117E-13	1.311E-7	7.758E-10	9.662E-9	37	194	BAP1,AKT1,ATP1A3,ADGRB1,CCND1,NOTCH2,PHB,PSMC3IP,BRMS1,POLD2,RASL10B,PSAP,CASZ1,MRC2,QDPR,MAP1S,ENO1,ENO2,FZR1,FASN,GET4,FAIM2,BEX1,GFAP,MAPK8IP3,STK11,PCSK1N,PDLIM2,THOP1,THRSP,HMGN1,UCHL1,HRAS,PRMT2,UMPS,UQCRC1,MTCH1
Pubmed	21139048	Mass spectrometric analysis of lysine ubiquitylation reveals promiscuity at site level.	Pubmed	1.362E-12	1.959E-7	1.152E-9	1.435E-8	39	216	ADSL,EIF3F,ATP5PO,CBS,PHB,COX5B,POLR1C,AAR2,PSMA7,PSMB5,PSMB6,PTBP1,PHGDH,GRWD1,KCTD10,RPL28,RPLP0,RPLP2,FBL,RPS12,MRPL27,RPS20,FARSA,HAX1,SGTA,DLGAP4,GET4,TRABD,TIMM50,PCID2,CYB5R1,RUVBL2,NCDN,PRPF19,UBC,UQCRC1,HSPB1,ITGA5,MLF2
Pubmed	16236267	Proteomic analysis of SUMO4 substrates in HEK293 cells under serum starvation-induced stress.	Pubmed	1.474E-12	2.120E-7	1.240E-9	1.544E-8	23	78	ALDOA,ARHGDIA,EIF3I,CALR,PAFAH1B3,PHB,CLIC1,PHGDH,PDIA6,ENO1,ENO2,SF3B4,RACK1,CCT7,SPINT2,STAT3,GSTP1,HSPA1B,HSPA5,IMPDH2,JUN,RPSA,LMNA
Pubmed	19167051	Importin 8 is a gene silencing factor that targets argonaute proteins to distinct mRNAs.	Pubmed	1.724E-12	2.480E-7	1.434E-9	1.785E-8	26	101	SLC25A5,ATP5ME,MYH9,SLC25A3,SLC25A10,QPCTL,DDOST,SLC25A22,RPL11,RPL27,RPL27A,RPS5,RPS9,RPS20,RPS26,TUBB4B,EIF3L,TUBB,SLC25A1,GALK1,AGO2,RUVBL2,TUBB2A,TUFM,HSPA1A,HSPA5
Pubmed	26643866	HDAC6 activity is not required for basal autophagic flux in metastatic prostate cancer cells.	Pubmed	1.725E-12	2.480E-7	1.434E-9	1.785E-8	19	52	TRRAP,MYH9,MYL6,PHGDH,EEF2,ENO1,RPL3,RPLP2,RPS3,RPS5,RPS15,RPS15A,TUBA1B,TUBB4B,FASN,TUBB,HIST1H2BB,HSPA1B,RPSA
Pubmed	12975309	The secreted protein discovery initiative (SPDI), a large-scale effort to identify novel human secreted and transmembrane proteins: a bioinformatics assessment.	Pubmed	1.878E-12	2.701E-7	1.552E-9	1.933E-8	101	987	COMTD1,IGSF9,C1QTNF1,PTOV1,UQCC3,DLK2,FXYD6,FGFRL1,BSG,ANKRD52,CA11,PGLYRP1,ADGRG1,TAOK2,CRELD1,ECEL1,SMOX,TMCO1,GMPPB,NDUFB11,DLL4,CORT,MXRA8,CRELD2,CXCL14,CBLN4,LRP10,LRFN3,INTS1,SPOCK2,RETSAT,SEMA4C,TMEM161A,TMEM130,TMCC2,EMC10,TMEM231,CHPF,SH2D3C,SEZ6L2,KIF7,TMX2,ANGPTL6,APH1A,EGFL7,MFSD13A,TMEM205,ENKD1,TEX264,CHST12,SEMA6B,ALKBH7,BCAN,TMEM107,FGF22,LMBR1L,PPIL1,CNPY3,SPINT1,CDH23,ARID5A,TIN…
Pubmed	18554416	Identification of transcripts with enriched expression in the developing and adult pancreas.	Pubmed	2.221E-12	3.194E-7	1.825E-9	2.273E-8	70	575	H2AFV,MDK,LTBP4,MCFD2,MAGEH1,APLP1,KHSRP,ARHGDIG,HAP1,CDKN1A,CHD3,SLC25A3,GDAP1L1,COL1A2,COL9A2,POU3F4,ZNF385A,REM2,DHX34,SLC36A1,PSMA7,DDOST,SLC38A10,EMC10,RAP1GAP,RBP1,MRPS18A,MRPL4,PDIA6,RPL8,NR2F6,RPL37A,RPS3,FBLN2,HES6,PFDN6,FKBP4,SDHC,ARX,NHP2,SPINT2,SLIT1,FUCA1,KIF1C,BEX1,KDM6B,TINAGL1,GADD45G,SURF4,PCSK1N,ERP29,GNAI2,COTL1,GSN,TGM2,TLN1,HBA2,HMGA1,PLXNB2,UCP2,MTCH1,HSPA5,DIABLO,ZNF707,ISL…
Pubmed	21906983	Systematic and quantitative assessment of the ubiquitin-modified proteome.	Pubmed	2.652E-12	3.814E-7	2.162E-9	2.692E-8	36	191	ADSL,ATP5PO,PHB,POLR1C,AAR2,PSMA7,PSMB5,PSMB6,PTBP1,PHGDH,GRWD1,TSC22D3,MRPS7,KCTD10,RPL28,RPLP0,RPLP2,FBL,RPS8,RPS12,RPS20,FARSA,HAX1,SGTA,PPP6R1,TRABD,TIMM50,PCID2,CYB5R1,RUVBL2,NCDN,PRPF19,UBC,UQCRC1,HSPB1,ITGA5
Pubmed	21078624	Comparison of an expanded ataxia interactome with patient medical records reveals a relationship between macular degeneration and ataxia.	Pubmed	2.661E-12	3.827E-7	2.162E-9	2.692E-8	28	119	ABCA2,MATK,C1QTNF1,ALDOA,LTBP4,NDUFB8,NOTCH1,PMM1,UBQLN2,PPP1R12C,OLIG1,MEGF6,RPL31,FBLN1,VPS52,PUF60,MANBAL,EHMT2,GRN,HSPG2,VWF,TUBB2B,JAG2,LAMB1,LAMB2,LLGL1,LRP1,LTBP3
Pubmed	16381901	The LIFEdb database in 2006.	Pubmed	2.727E-12	3.922E-7	2.203E-9	2.744E-8	81	720	MRPL15,CCAR2,FXYD6,CCND1,PIP4P1,C1QC,BAIAP3,CAMK2B,TMED4,ENTPD6,CDKN1A,PHB,CRELD1,GRHPR,YIPF3,DDIT4,RPL36,CXCL14,SF3B5,ABHD11,SLC36A1,DBN1,TMEM130,SV2A,INTS11,QDPR,MUL1,FAM57B,EGLN2,ROGDI,FBXO31,ELN,STK40,ENO1,IMP3,HDAC11,SPRY2,FAM234A,ABI3,COA4,PLEKHN1,ENKD1,NRSN2,RACK1,TOMM40L,IFITM3,TADA3,HPCAL4,FKBP5,PTGES2,SGTA,ATP5MG,RNF123,GNB5,NUDC,USE1,HOPX,RUVBL2,STAT3,DMAP1,SURF4,TRIOBP,CDC37,TMEM9,SEC…
Pubmed	21963094	Global identification of modular cullin-RING ligase substrates.	Pubmed	2.754E-12	3.961E-7	2.213E-9	2.756E-8	33	163	ADSL,EIF3F,CCNF,PHB,POLR1C,AAR2,PSMA7,PSMB5,PSMB6,PTBP1,PHGDH,GRWD1,MRPS7,KCTD10,RPL28,RPLP0,RPLP2,FBL,RPS8,RPS12,RPS20,FARSA,HAX1,SEMA3F,SGTA,PPP6R1,TRABD,PCID2,RUVBL2,UBC,UQCRC1,HSPB1,ITGA5
Pubmed	16964243	A probability-based approach for high-throughput protein phosphorylation analysis and site localization.	Pubmed	2.809E-12	4.040E-7	2.244E-9	2.795E-8	64	503	MCM2,BEGAIN,AMPD2,DBNL,KHSRP,IRS2,SRSF9,MYH9,PYGO2,SQSTM1,ANKRD52,CAD,PCBP1,CDKN1A,TBRG4,RCC1,ANAPC2,RIN1,MAP2K2,CC2D1A,DFFA,UCKL1,SAMD4B,BOLA1,IPO4,EEF2,PDIA6,TRIM28,RPL18,RPLP1,STUB1,RPLP2,RPS2,FASN,FKBP4,AGAP3,FLII,MYBBP1A,SGTA,FTH1,SNRNP70,KIF1C,PPP1R13L,DMAP1,EHMT2,ZC3H4,RRP12,BOP1,TLE3,SCRIB,CARHSP1,GIGYF1,HSPA1A,HSPA1B,HSPB1,ZNF574,VIM,FAM129B,ITGB4,BAG6,NELFE,KLC4,USP5,LMNA
Pubmed	15840001	Characterization of an exchangeable gene trap using pU-17 carrying a stop codon-beta geo cassette.	Pubmed	3.068E-12	4.412E-7	2.437E-9	3.036E-8	64	504	ALAD,RANBP3,CCDC12,ARF3,MYH9,TPRA1,BCKDHA,ANKRD52,NOTCH2,CD81,CHMP1A,DDA1,NTN1,DCTPP1,PMM1,MIER2,MINK1,PPP1R8,NCOR2,CSNK1G2,DYNLL2,KDM4A,CTNNB1,MAP2K2,SZRD1,TMEM161A,PTPN14,VPS37B,SLC25A51,KCTD10,SLC38A7,KIRREL1,ECHDC2,RPL27A,ZNF444,MRPL12,CHST12,FGFR1,FKBP4,SDHC,AGPAT1,SLC2A1,SIPA1L3,SREBF2,AHDC1,STAT3,NDUFA12,KAZN,TCF3,NXN,KANK3,LRRC8A,CDC42EP4,CARHSP1,LYPLA2,UMPS,XRCC1,YWHAG,MRPL38,PTDSS2,KIFC…
Pubmed	15489336	From ORFeome to biology: a functional genomics pipeline.	Pubmed	3.146E-12	4.524E-7	2.486E-9	3.096E-8	81	722	MRPL15,CCAR2,FXYD6,CCND1,PIP4P1,C1QC,BAIAP3,CAMK2B,TMED4,ENTPD6,CDKN1A,PHB,CRELD1,GRHPR,YIPF3,DDIT4,RPL36,CXCL14,SF3B5,ABHD11,SLC36A1,DBN1,TMEM130,SV2A,INTS11,QDPR,MUL1,FAM57B,EGLN2,ROGDI,FBXO31,ELN,STK40,ENO1,IMP3,HDAC11,SPRY2,FAM234A,ABI3,COA4,PLEKHN1,ENKD1,NRSN2,RACK1,TOMM40L,IFITM3,TADA3,HPCAL4,FKBP5,PTGES2,SGTA,ATP5MG,RNF123,GNB5,NUDC,USE1,HOPX,RUVBL2,STAT3,DMAP1,SURF4,TRIOBP,CDC37,TMEM9,SEC…
Pubmed	22990118	Charting the landscape of tandem BRCT domain-mediated protein interactions.	Pubmed	3.550E-12	5.105E-7	2.790E-9	3.474E-8	77	671	RHBDD2,WDR18,COMTD1,AKT1,ALDOA,AMFR,PDXK,MT2A,FLCN,EIF3B,EIF3I,SRSF9,AUP1,NDUFB10,H1FX,SELENBP1,PEX10,GRHPR,ANAPC2,PYCR2,COL1A2,MRM2,POLR2E,POLR2I,CSRP2,SLC25A10,CSTB,CTBP1,MAP2K2,FBLL1,PSAP,PSMA7,PSMD4,PHGDH,NOP9,DPP3,RFC2,DALRD3,SLC25A22,TMEM120A,MYH14,ENO1,RPL11,RPS20,NPM3,FZR1,FASN,RACK1,FEN1,SDHB,FLII,PGGHG,PUF60,PRR5,NPC2,PPP6R1,SLC1A5,CIAO2B,PDCD11,FUCA1,TRAPPC3,SNRNP70,NUDC,GALK1,RUVBL2,C…
Pubmed	10512203	Exchangeable gene trap using the Cre/mutated lox system.	Pubmed	3.656E-12	5.258E-7	2.857E-9	3.559E-8	64	506	ALAD,RANBP3,CCDC12,ARF3,MYH9,TPRA1,BCKDHA,ANKRD52,NOTCH2,CD81,CHMP1A,DDA1,NTN1,DCTPP1,PMM1,MIER2,MINK1,PPP1R8,NCOR2,CSNK1G2,DYNLL2,KDM4A,CTNNB1,MAP2K2,SZRD1,TMEM161A,PTPN14,VPS37B,SLC25A51,KCTD10,SLC38A7,KIRREL1,ECHDC2,RPL27A,ZNF444,MRPL12,CHST12,FGFR1,FKBP4,SDHC,AGPAT1,SLC2A1,SIPA1L3,SREBF2,AHDC1,STAT3,NDUFA12,KAZN,TCF3,NXN,KANK3,LRRC8A,CDC42EP4,CARHSP1,LYPLA2,UMPS,XRCC1,YWHAG,MRPL38,PTDSS2,KIFC…
Pubmed	27626371	Accessory subunits are integral for assembly and function of human mitochondrial complex I.	Pubmed	5.015E-12	7.213E-7	3.878E-9	4.829E-8	15	32	NDUFA1,NDUFA2,NDUFA3,NDUFA6,NDUFA8,NDUFB2,NDUFB6,NDUFB7,NDUFB8,NDUFB10,NDUFS6,NDUFV3,NDUFB11,NDUFA12,NDUFA11
Pubmed	21556144	Region-specific expression of mitochondrial complex I genes during murine brain development.	Pubmed	5.015E-12	7.213E-7	3.878E-9	4.829E-8	15	32	NDUFA1,NDUFA2,NDUFA3,NDUFA6,NDUFA8,NDUFB2,NDUFB6,NDUFB7,NDUFB8,NDUFB10,NDUFV1,NDUFS6,NDUFS8,NDUFV3,NDUFS7
Pubmed	23151878	Cleavage and polyadenylation specificity factor 1 (CPSF1) regulates alternative splicing of interleukin 7 receptor (IL7R) exon 6.	Pubmed	5.367E-12	7.719E-7	4.128E-9	5.141E-8	24	90	SRSF9,H1FX,CPSF1,PTBP1,RPL6,RPL8,RPL15,RPL18,RPL31,RPS3,RPS20,FAU,RACK1,EMG1,SNRNP70,SNRPA,SNRPD2,SNRPG,U2AF2,ZNF787,YWHAG,TOE1,DDX39B,RPSA
Pubmed	18977241	Oxidative stress, telomere length and biomarkers of physical aging in a cohort aged 79 years from the 1932 Scottish Mental Survey.	Pubmed	1.059E-11	1.522E-6	8.098E-9	1.008E-7	27	117	NDUFA3,NDUFA6,NDUFA8,NDUFB7,NDUFB8,NDUFB10,NDUFV1,NDUFS6,NDUFS8,NDUFV3,NOS1,NOS3,CBS,TXN2,CSNK1D,CTNNB1,NDUFS7,HSPA12B,FOSB,FTL,GFAP,GSTP1,UCP2,DNAJB2,HSPA1A,HSPA5,VIM
Pubmed	16916647	Substrate and functional diversity of lysine acetylation revealed by a proteomics survey.	Pubmed	1.224E-11	1.761E-6	9.318E-9	1.160E-7	35	191	H2AFV,ACADVL,MDH2,HIST1H4I,HIST1H2BE,ALDH2,ALDOA,SLC25A5,ARHGDIA,MT2A,ATP5PO,NDUFA2,NDUFV1,NDUFS6,RPL10A,SLC25A3,DBI,SARDH,SERF2,ENO1,FKBP4,ATP5MG,SOD1,NDUFA12,JADE2,TKT,HIST1H2BB,HADH,HBB,HMGCL,TST,UQCRC1,HSPB1,IVD,LMNA
Pubmed	25192599	Interaction of amyotrophic lateral sclerosis/frontotemporal lobar degeneration-associated fused-in-sarcoma with proteins involved in metabolic and protein degradation pathways.	Pubmed	1.249E-11	1.796E-6	9.453E-9	1.177E-7	36	201	MDH2,MFGE8,ALDOA,SLC25A5,PFKL,PHB,CKB,SLC25A3,GPR101,PHGDH,RAN,EEF2,ENO1,RPL11,RPL18,SF3B4,RPS5,RPS8,RPS9,TUBA1B,FASN,SEC13,TUBB,CCT7,SLC1A5,TIMM50,SNRPD2,GSTP1,TKT,TUFM,UBC,PRMT1,HSPA5,PYCR3,LMNA,LYZ
Pubmed	9878551	cDNA of eight nuclear encoded subunits of NADH:ubiquinone oxidoreductase: human complex I cDNA characterization completed.	Pubmed	1.500E-11	2.157E-6	1.124E-8	1.399E-7	15	34	NDUFA1,NDUFA2,NDUFA3,NDUFA6,NDUFA8,NDUFB2,NDUFB6,NDUFB7,NDUFB8,NDUFB10,NDUFV1,NDUFS6,NDUFS8,NDUFV3,NDUFS7
Pubmed	10984455	Comparative maps of human 19p13.3 and mouse chromosome 10 allow identification of sequences at evolutionary breakpoints.	Pubmed	1.500E-11	2.157E-6	1.124E-8	1.399E-7	15	34	MATK,AES,BSG,OAZ1,CDC34,MAP2K2,DAPK3,PTBP1,HMG20B,SIRT6,GNA11,GNG7,TCF3,LMNB2,THOP1
Pubmed	17601350	A genetic association analysis of cognitive ability and cognitive ageing using 325 markers for 109 genes associated with oxidative stress or cognition.	Pubmed	1.616E-11	2.323E-6	1.204E-8	1.499E-7	27	119	NDUFA3,NDUFA6,NDUFA8,NDUFB7,NDUFB8,NDUFB10,NDUFV1,NDUFS6,NDUFS8,NDUFV3,NOS1,NOS3,CBS,TXN2,CSNK1D,CTNNB1,NDUFS7,HSPA12B,FOSB,FTL,GFAP,GSTP1,UCP2,DNAJB2,HSPA1A,HSPA5,VIM
Pubmed	12777385	Proteomic analysis of human Nop56p-associated pre-ribosomal ribonucleoprotein complexes. Possible link between Nop56p and the nucleolar protein treacle responsible for Treacher Collins syndrome.	Pubmed	1.732E-11	2.491E-6	1.284E-8	1.599E-7	21	72	SLC25A5,RPL10A,SNU13,H1FX,EEF2,RPL3,RPL6,RPL8,RPL11,RPL15,RPL18,RPL27A,RPL31,RPL35A,RPS4X,RPS8,RPS9,RPS16,MYBBP1A,U2AF2,TUFM
Pubmed	27129302	HEY1 functions are regulated by its phosphorylation at Ser-68.	Pubmed	1.888E-11	2.715E-6	1.392E-8	1.734E-7	24	95	CCDC124,FMNL1,PLEC,DCTN1,RPL8,RPL11,RPL15,FBL,RPS3,RPS5,RPS10,RPS15A,RPS16,RPS20,RPS29,TUBA1B,TUBB4B,FAU,FEN1,TUBB,TUBB2A,HSPA1A,HSPA5,VIM
Pubmed	25144556	Autophagic degradation of the inhibitory p53 isoform ?133p53? as a regulatory mechanism for p53-mediated senescence.	Pubmed	2.323E-11	3.340E-6	1.704E-8	2.122E-7	23	88	SLC25A5,MYH9,SQSTM1,DBN1,RPL7A,RPL8,RPL27,RPL28,RPLP0,STUB1,RPS2,RPS4X,RPS16,TUBB,CCT7,DHRS4,GSN,TUBB2A,HSPA1A,HSPA1B,VIM,LMNA,LYZ
Pubmed	12865426	Proteomic analysis of the mouse liver mitochondrial inner membrane.	Pubmed	2.463E-11	3.542E-6	1.798E-8	2.239E-7	31	157	MDH2,MPST,SLC25A5,ATP5F1D,NDUFA3,NDUFA8,NDUFB7,NDUFB8,NDUFB10,NDUFV1,UQCR10,PHB,SLC25A3,SLC25A10,PRODH,NDUFS7,SLC25A42,PAM16,SDHB,SHMT2,MRPL17,ATP5MG,UQCRQ,UQCR11,HSD17B10,HADH,HMGCL,TST,TUFM,UQCRC1,RHOT2
Pubmed	20467437	Direct interaction between hnRNP-M and CDC5L/PLRG1 proteins affects alternative splice site choice.	Pubmed	2.711E-11	3.899E-6	1.969E-8	2.453E-7	68	581	WDR18,LRRC47,MPP2,ARF5,FHOD1,MYH9,HIP1R,CCNB1,PCBP1,LRWD1,CHD3,ANAPC2,CPSF1,PLEC,POLD1,GTPBP1,NCOR2,SEC24C,CSK,MAP2K2,EIF4A3,INTS1,PSMC3,PSMD3,PTBP1,DCTN1,PHGDH,MVP,RANGAP1,UPF1,RFC2,DDX39A,SF3B4,TUBA1B,TUBB4B,FASN,FEN1,DDX41,MYBBP1A,CHERP,PUF60,TUBB,CCT7,NSUN5,SNRNP70,SNRPA,NUDC,SRP54,UNC45A,RUVBL2,STAB1,EHD1,PRPF19,GCN1,TLN1,SCRIB,U2AF2,EDC4,UMPS,HSPA5,VASP,HSPB1,VIM,FAM129B,DDX39B,LMNA,SF3A2,S…
Pubmed	14656967	Analysis of the gene-dense major histocompatibility complex class III region and its comparison to mouse.	Pubmed	2.766E-11	3.979E-6	1.999E-8	2.490E-7	18	53	ZBTB12,LSM2,NFKBIL1,C4B,NOTCH4,PBX2,CLIC1,ATF6B,DXO,AGPAT1,EHMT2,KANK3,TNXB,HSPA1A,HSPA1B,BAG6,DDX39B,NELFE
Pubmed	23667531	The SOX2-interactome in brain cancer cells identifies the requirement of MSI2 and USP9X for the growth of brain tumor cells.	Pubmed	3.386E-11	4.869E-6	2.435E-8	3.032E-7	43	282	CBX4,MRPL15,CCAR2,LSM2,CALR,PBX2,CHD3,ANAPC2,CNP,FOXP4,CTNNB1,INTS1,INTS11,RANGAP1,SAMD4B,IPO4,RFX1,MRPL4,RNH1,DDX39A,MRPL12,ETV3,ZBTB7A,AMOTL2,PPP6R1,SMARCB1,SRP54,TNRC18,EHMT2,MED22,GCN1,SIN3B,MEPCE,HSD17B10,PATZ1,TUBB2A,HSPB1,ZNF787,MRPL9,IMPDH2,JUND,LGALS3BP,MLF2
Pubmed	23084401	The cellular EJC interactome reveals higher-order mRNP structure and an EJC-SR protein nexus.	Pubmed	3.757E-11	5.403E-6	2.688E-8	3.348E-7	32	169	HIST1H2BC,HIST1H4A,SLC25A5,SRSF9,MYH9,CCDC9,EIF4A3,DBN1,RAN,RPL3,RPL6,RPL7A,RPL8,RPL15,RPL18,RPL27A,RPL28,FBL,RPS2,RPS3,RPS8,RPS9,FASN,PPIE,POLDIP3,SNRNP70,SNRPD2,PRPF19,PRMT1,HSPA1A,VIM,BOLA2
Pubmed	19060904	An empirical framework for binary interactome mapping.	Pubmed	4.771E-11	6.862E-6	3.397E-8	4.230E-7	38	231	DBNL,LRRC61,AP1M1,GLYCTK,CKB,HOMER3,COMT,RIN1,SLC25A10,CYBA,MUL1,EXOC8,CNNM3,IMP3,NUDT18,ABI3,RPS26,SALL2,FBXL18,FES,MIEF2,PHLDA1,HIF1AN,TRIM32,NEU4,CDC42EP1,ZC3H10,RASD2,NR1H2,VASP,FBF1,MRPL9,ZFAND2B,EXOSC5,JUP,AGTRAP,AIMP2,PBXIP1
Pubmed	16009940	Human ISG15 conjugation targets both IFN-induced and constitutively expressed proteins functioning in diverse cellular pathways.	Pubmed	5.191E-11	7.466E-6	3.678E-8	4.580E-7	30	152	ALDOA,ANXA2,CBX4,MYH9,CLIC1,PLEC,PLOD1,PSMA7,PTBP1,PHGDH,RAN,ACOT8,EEF2,ENO1,RPL27A,SF3B4,RPS27A,FASN,RACK1,LMAN2,TAGLN,GSTP1,TKT,MEPCE,UBA7,HSPA1A,VIM,WARS,LMNA,SF3A2
Pubmed	21731673	Deterministic and stochastic allele specific gene expression in single mouse blastomeres.	Pubmed	5.440E-11	7.824E-6	3.835E-8	4.776E-7	51	378	H2AFV,ACVR2B,FZD1,FZD8,MBD3,CCND1,SLC5A6,NOTCH1,NOTCH2,NOTCH4,CCNB1,CCND3,TFCP2L1,PIK3CD,PIK3R2,BAMBI,ANKRD35,ZNF385A,CTNNB1,TES,PARD6A,RARG,HDAC5,TLNRD1,FBXO31,HDAC11,KLF2,IFITM3,FGFR1,SMO,FZD2,AGO2,NKX6-2,RNF114,STAT3,EHMT2,NOMO1,CDC37,ZBTB45,SLC7A3,TLE3,HRAS,WNT2,WNT7A,WNT7B,ID1,ID3,ISL1,JAG2,FZD5,LRP5
Pubmed	17643375	Systematic analysis of the protein interaction network for the human transcription machinery reveals the identity of the 7SK capping enzyme.	Pubmed	5.494E-11	7.901E-6	3.854E-8	4.800E-7	52	390	TRRAP,KHSRP,ARF6,CCAR2,LSM2,SRSF9,BAX,BCR,SNU13,CAPNS1,PCBP1,PFKL,TFPT,LSM4,POLR2E,MAP2K2,EIF4A3,INTS1,PHGDH,PIH1D1,RANGAP1,RFC2,TRIM28,RPLP0,ACTR5,FBL,RPS2,RPS3,RPS4X,RPS9,RXRG,TUBB4B,PFDN6,TADA3,FKBP5,PUF60,HEXIM1,SNRPD2,LSM7,SNRPG,RUVBL2,DMAP1,GCN1,MEPCE,CDC42EP4,PRMT1,HSPA5,EXOSC5,PDRG1,BAG6,NELFE,KLC4
Pubmed	23874603	HIV-1 Vpr modulates macrophage metabolic pathways: a SILAC-based quantitative analysis.	Pubmed	6.647E-11	9.560E-6	4.641E-8	5.780E-7	28	135	MDH2,ALDOA,SLC25A5,KHSRP,CCAR2,ATP5F1D,ATP6V1B2,MYH9,CALR,PHB,CLIC1,PLEC,SCAMP3,RPL11,RPLP0,VAT1,HYOU1,FTH1,FTL,LMNB2,GSN,GSTP1,TKT,HSD17B10,HLA-A,HSPA5,VIM,LMNA
Pubmed	6188845	Immunochemical accessibility of ribosomal protein S4 in the 30 S ribosome. The interaction of S4 with S5 and S12.	Pubmed	7.048E-11	1.014E-5	4.897E-8	6.099E-7	12	22	RPS2,RPS3,RPS4X,RPS5,RPS8,RPS9,RPS10,RPS12,RPS15,RPS16,RPS20,RPS21
Pubmed	16537572	Nell1-deficient mice have reduced expression of extracellular matrix proteins causing cranial and vertebral defects.	Pubmed	7.206E-11	1.036E-5	4.983E-8	6.205E-7	35	203	MDK,MFGE8,ENC1,TPRA1,NOTCH1,COL1A2,COL6A2,COL9A2,NCAN,CSPG4,PRKCD,PRKCSH,SPOCK2,PTH1R,MRC2,PYGB,HGH1,RACK1,FGFR1,BAIAP2,SGSH,FRS3,GDF10,NCDN,TGFBI,THBD,THBS3,TNXB,HAPLN2,NPDC1,VWA1,TFIP11,LAMB2,LAMB3,LTBP3
Pubmed	11401437	A complete map of the human ribosomal protein genes: assignment of 80 genes to the cytogenetic map and implications for human disorders.	Pubmed	8.786E-11	1.264E-5	6.046E-8	7.529E-7	13	27	RPL36,RPL3,RPL6,RPL7A,RPL27,RPL37,RPL37A,RPL39,RPL41,RPLP0,RPLP1,RPLP2,RPS4X
Pubmed	20000738	Proteomic dissection of cell type-specific H2AX-interacting protein complex associated with hepatocellular carcinoma.	Pubmed	9.493E-11	1.365E-5	6.501E-8	8.096E-7	24	102	HIST1H4A,ALDOA,ANXA2,CALR,RAB11B,PLOD1,PRKCSH,PDCD6,EEF1B2,PDIA6,ENO1,RPLP2,RPS10,VAT1,PTGES2,HYOU1,ERP29,TKT,HSD17B10,CMBL,HSPA1A,FKBP10,LGALS3BP,LMNA
Pubmed	21890473	A proteome-wide, quantitative survey of in vivo ubiquitylation sites reveals widespread regulatory roles.	Pubmed	9.788E-11	1.408E-5	6.672E-8	8.309E-7	34	195	ADSL,ATP5PO,CBS,PHB,COX5B,POLR1C,AAR2,PSMA7,PSMB5,PSMB6,PTBP1,PHGDH,MRPS7,KCTD10,RPL28,RPLP0,RPLP2,FBL,RPS8,RPS12,MRPL27,RPS20,FARSA,HAX1,SGTA,PPP6R1,TIMM50,PCID2,CYB5R1,RUVBL2,NCDN,PRPF19,UBC,UQCRC1
Pubmed	14667819	Analysis of a high-throughput yeast two-hybrid system and its use to predict the function of intracellular proteins encoded within the human MHC class III region.	Pubmed	1.068E-10	1.537E-5	7.217E-8	8.988E-7	25	111	FHOD1,LSM2,ATP5MC3,PBX2,CACTIN,CLIC1,CPSF1,DXO,DDX39A,SF3B4,RPS15A,TMEM222,BAIAP2,ZNHIT1,SGTA,ZDHHC7,RNF126,SNRPD2,LSM7,GPRC5C,BLOC1S1,PRMT2,BAG6,DDX39B,NELFE
Pubmed	16919471	Potential target genes of EMX2 include Odz/Ten-M and other gene families with implications for cortical patterning.	Pubmed	1.069E-10	1.537E-5	7.217E-8	8.988E-7	16	44	ADPRH,RHOB,NME2,DDA1,CHPF,RAN,TUBA1B,RACK1,SMARCB1,CIC,GADD45G,THRA,CARHSP1,COPE,HPCAL1,UCHL1
Pubmed	19851445	High-density SNP screening of the major histocompatibility complex in systemic lupus erythematosus demonstrates strong evidence for independent susceptibility regions.	Pubmed	1.129E-10	1.624E-5	7.589E-8	9.451E-7	32	176	LEMD2,LSM2,SYNGAP1,IER3,NFKBIL1,NOTCH4,DDR1,PBX2,CLIC1,ATF6B,PSMB8,DAXX,RING1,VPS52,PFDN6,AGPAT1,TUBB,EHMT2,GNL1,TAP1,TAP2,TAPBP,TNXB,HLA-A,HLA-E,HSPA1A,HSPA1B,ITPR3,BAG6,DDX39B,NELFE,VARS2
Pubmed	16959763	Transgenic mouse proteomics identifies new 14-3-3-associated proteins involved in cytoskeletal rearrangements and cell signaling.	Pubmed	1.146E-10	1.648E-5	7.663E-8	9.543E-7	28	138	OSBPL7,GIT1,PPFIA3,MYH9,BCR,SYNGAP1,LDB1,NOS1,CAMK2B,PDE1B,PFKL,CAMKV,PLEC,HOMER3,CNP,ROGDI,EEF1B2,ENO1,SBF1,VAT1,SMARCB1,GFAP,GSN,TUBB2A,TUFM,HSPA5,CLIP2,YWHAG
Pubmed	11256614	Systematic subcellular localization of novel proteins identified by large-scale cDNA sequencing.	Pubmed	1.200E-10	1.725E-5	7.988E-8	9.947E-7	62	523	ADSL,RANBP3,MRPL15,CCAR2,FXYD6,CCND1,NDUFB8,TBRG4,PHB,GRHPR,CAMKV,YIPF3,DDIT4,RPL36,NDUFAF3,CXCL14,SYF2,CCDC9,SF3B5,SLC36A1,DBN1,TMEM130,COMMD4,SV2A,QDPR,MUL1,HSPB8,FAM57B,EGLN2,ROGDI,IER3IP1,ENO1,IMP3,HDAC11,ABI3,CXXC1,ENKD1,NRSN2,RACK1,TOMM40L,IFITM3,TADA3,HPCAL4,PTGES2,SGTA,ATP5MG,RNF123,GNB5,SYVN1,NUDC,RNF114,RUVBL2,STRA6,RNF208,CDC37,HADH,COPE,GABARAPL2,TFIP11,RGMA,ITM2C,RAB1B
Pubmed	15161933	Comprehensive proteomic analysis of interphase and mitotic 14-3-3-binding proteins.	Pubmed	1.275E-10	1.834E-5	8.415E-8	1.048E-6	31	167	HIST1H4I,HIST1H4A,HIST1H4D,HIST1H4F,HIST1H4C,HIST1H4H,ANXA2,PDXK,IRS2,RPL10A,PFKL,HDAC5,PDCD6,SAMD4B,TRIM28,ENO1,RPL15,RPLP0,RPLP2,RPS3,FASN,TUBB,FSCN1,SPR,SPTB,RUVBL2,GCN1,TLN1,HSPB1,VIM,LMNA
Pubmed	24006456	Extracellular matrix secretion by cardiac fibroblasts: role of microRNA-29b and microRNA-30c.	Pubmed	1.276E-10	1.835E-5	8.415E-8	1.048E-6	37	228	MFGE8,MIF,ALDOA,LTBP4,ANXA2,C1QC,CCN3,PLTP,COL1A2,COL6A2,ATF6B,CST3,PSAP,RARRES2,ECM1,FBLN1,FBLN2,SEMA3F,NPC2,SOD1,SPARC,TINAGL1,MYDGF,GRN,GSN,TGFBI,TIMP2,TPT1,PLA2G15,HSPG2,VWF,IGFBP4,ISLR,FAM20C,LAMB1,LAMB2,LGALS3BP
Pubmed	21903422	Mapping a dynamic innate immunity protein interaction network regulating type I interferon production.	Pubmed	1.363E-10	1.960E-5	8.949E-8	1.115E-6	42	283	CCDC124,AIP,TMCO1,YIPF3,NOP53,GTPBP1,GTPBP2,CTBP1,TBKBP1,KEAP1,DDOST,AP5Z1,NLRX1,SCAMP3,CNNM3,FARSA,CDIPT,FKBP4,FKBP5,CDC42BPG,HYOU1,RBCK1,TRMT2A,TRIM32,AGO2,SARM1,STAT3,SURF4,PRRC2B,OBSL1,CDC37,EDC4,UBC,DIABLO,MIB2,YWHAG,NT5DC2,IRF3,IRF5,COQ8A,UNC93B1,BAG6
Pubmed	22505724	Methods for quantification of in vivo changes in protein ubiquitination following proteasome and deubiquitinase inhibition.	Pubmed	1.401E-10	2.015E-5	9.157E-8	1.140E-6	27	130	ADSL,EIF3F,POLR1C,AAR2,PSMA7,PSMB5,PSMB6,PTBP1,PHGDH,GRWD1,MRPS7,KCTD10,RPL28,RPLP0,RPLP2,FBL,RPS8,RPS12,RPS20,FARSA,HAX1,SGTA,PPP6R1,PCID2,RUVBL2,UBC,UQCRC1
Pubmed	24999758	Proteomic Analysis of the EWS-Fli-1 Interactome Reveals the Role of the Lysosome in EWS-Fli-1 Turnover.	Pubmed	1.473E-10	2.118E-5	9.584E-8	1.194E-6	54	425	H2AFV,MAZ,PRR12,ANXA2,PDLIM4,ARHGDIA,CCDC124,SRSF9,BCL9L,EDF1,BSG,CALR,CBR3,CLIC1,SEC24C,CSRP2,PRKCSH,CHTF8,GRWD1,UPF1,EEF1B2,PDIA6,DAZAP1,RPL7A,RPL8,RPL31,SF3B4,RPLP0,RPLP2,RPS10,ETV3,RPS27A,NPM3,PFDN6,FKBP4,SEC13,HYOU1,AHSA1,PPIL1,SNRPA,SOD1,RNF114,CIC,HDGFL2,NOMO1,CDC37,U2AF2,ARFIP2,SDF2L1,HSPE1,EIF4H,JUN,BAG6,RPSA
Pubmed	30033366	Mapping the Genetic Landscape of Human Cells.	Pubmed	1.640E-10	2.359E-5	1.063E-7	1.323E-6	56	451	MARS,TRRAP,DHX37,ARL2,MRPL15,NDUFA2,NDUFA8,NDUFB2,ZNF598,PFAS,TBCB,CACTIN,EXOSC4,POLD1,POLR2K,ATP6V1G1,ROMO1,PSMB6,PSMD4,CARS2,MRPS16,MRPS18A,KCTD10,RPL3,RPL8,RBFA,RPL11,RPL27,RPL28,RPLP1,RPLP2,MRPL27,RPS27A,RPS28,FARSA,EMG1,PPIE,SDHC,TUBB,MED28,SYVN1,SNRNP70,NUDC,SNRPG,USE1,MED22,INTS5,LTO1,PMF1,COPE,UMPS,ZNF574,ADAT2,IMPDH2,PDRG1,RPSA
Pubmed	23464991	Drafting the CLN3 protein interactome in SH-SY5Y human neuroblastoma cells: a label-free quantitative proteomics approach.	Pubmed	1.830E-10	2.631E-5	1.180E-7	1.470E-6	20	73	SLC25A5,ARF3,ARF5,ATP1A3,AUP1,CDS2,CALR,SLC25A3,SLC25A10,DDOST,PHGDH,SCAMP3,SLC25A22,CDIPT,ATP5MG,SLC25A1,STRA6,GCN1,FKBP8,SFXN3
Pubmed	19521500	The level of the transcription factor Pax6 is essential for controlling the balance between neural stem cell self-renewal and neurogenesis.	Pubmed	1.872E-10	2.693E-5	1.202E-7	1.497E-6	37	231	RHOB,MRPL15,SRSF9,RPL10A,BSG,SERPINH1,PAFAH1B3,GLYCTK,ATP6V1F,GMPPB,POLR2K,GTPBP1,RAN,RPL35A,RPL37A,RPS9,RPS20,FGFR1,PUF60,SIVA1,BCAN,KBTBD4,FTH1,FZD2,BEX1,NCDN,STAT3,GADD45G,ZC3H4,PCSK1N,HRAS,PLPPR2,ISL1,BTG2,WDR34,NKIRAS2,MLF2
Pubmed	19380743	Charting the molecular network of the drug target Bcr-Abl.	Pubmed	2.486E-10	3.576E-5	1.589E-7	1.979E-6	40	266	AP2A1,AP2A2,SLC25A5,ANXA2,MYH9,BCR,CAD,AP2S1,PIK3CD,PIK3R2,CSK,PRKCD,MYH14,RPLP0,RPS3,RPS5,DOK3,RPS10,RPS20,TUBA1B,TUBB4B,FASN,HAX1,TUBB,ASAP3,CCT7,TIMM50,AGO2,RUVBL2,EDC4,TUBB2A,UBC,HSPA1B,HSPA5,VASP,HSPG2,YWHAG,IMPDH2,TUBB2B,LYZ
Pubmed	24639526	RSPO-LGR4 functions via IQGAP1 to potentiate Wnt signaling.	Pubmed	2.608E-10	3.751E-5	1.660E-7	2.067E-6	34	202	SLC25A5,KHSRP,ATP1A3,MYH9,CAD,CALR,CHD3,SLC25A3,CPSF1,MAP2K2,FBLL1,PTBP1,DCTN1,DMPK,DVL2,EEF2,MYH14,TUBA1B,FASN,MYBBP1A,TUBB,SLC1A5,TBL3,ARHGEF40,PDCD11,LSM14B,WDR4,SURF4,RRP12,GCN1,NISCH,SCRIB,EDC4,UBC
Pubmed	22157746	CPEB2-eEF2 interaction impedes HIF-1? RNA translation.	Pubmed	2.691E-10	3.870E-5	1.705E-7	2.123E-6	12	24	NECAB2,PSAP,KEAP1,C2CD2L,EEF2,BSCL2,PUF60,GAA,CAPN15,SPARC,ATG2A,PIGS
Pubmed	21360678	Label-free quantitative proteomics and SAINT analysis enable interactome mapping for the human Ser/Thr protein phosphatase 5.	Pubmed	2.712E-10	3.901E-5	1.711E-7	2.131E-6	13	29	POLR2E,PPP5C,STUB1,TUBB4B,FASN,FKBP4,FKBP5,TUBB,CDC37,FKBP8,HSPA1B,TUBB2B,PDRG1
Pubmed	27462432	A genome-wide IR-induced RAD51 foci RNAi screen identifies CDC73 involved in chromatin remodeling for DNA repair.	Pubmed	2.978E-10	4.283E-5	1.870E-7	2.329E-6	29	153	MIF,ALDOA,ANXA2,ARF3,MYH9,CALR,PCBP1,PHGDH,RAN,EEF2,PDIA6,RNH1,ENO1,RPL11,RPLP0,RPS3,RPS5,RPS10,RPS27A,FKBP4,FBXO21,RUVBL2,UBC,HSPA5,HSPB1,VIM,JUP,RPSA,RAB1B
Pubmed	29111377	Mass spectrometry analyses of normal and polyglutamine expanded ataxin-3 reveal novel interaction partners involved in mitochondrial function.	Pubmed	3.829E-10	5.507E-5	2.394E-7	2.982E-6	17	54	SLC25A5,RHOG,NDUFA8,SERPINH1,SLC25A3,SLC25A10,SLC25A22,DDX39A,RPLP0,STUB1,SDHB,SLC25A1,ALG1,SLC27A4,ARFIP2,HSPA1A,IBA57
Pubmed	23166591	Nucleolar protein trafficking in response to HIV-1 Tat: rewiring the nucleolus.	Pubmed	5.200E-10	7.478E-5	3.237E-7	4.032E-6	20	77	MYH9,MYL6,SNU13,PHB,CLIC1,DBN1,RPL27,RPL35A,RPS2,FKBP4,VAT1,SNRPA,USP20,STAT3,TTLL12,BOP1,HSD17B10,U2AF2,YWHAG,IMPDH2
Pubmed	20811636	The protein network surrounding the human telomere repeat binding factors TRF1, TRF2, and POT1.	Pubmed	5.402E-10	7.770E-5	3.349E-7	4.171E-6	33	197	AP2A2,DHX37,MYH9,PCBP1,PFKL,KCTD15,PYCR2,PLOD1,POLD1,PSMA7,PSMB5,RING1,SNX22,SF3B4,STUB1,RPS2,RPS8,RPS16,ZNF703,RTL6,POLDIP3,GRPEL1,SNRNP70,FBXO21,ZGPAT,CDC37,TLN1,U2AF2,SDF2L1,NT5DC2,TFIP11,IVD,LLGL1
Pubmed	23665500	Phosphoinositide-specific phospholipase C ? 1b (PI-PLC?1b) interactome: affinity purification-mass spectrometry analysis of PI-PLC?1b with nuclear protein.	Pubmed	6.269E-10	9.016E-5	3.870E-7	4.819E-6	28	148	MDH2,ALDOA,SLC25A5,MBD3,ARF3,EIF3I,PCBP1,SLC25A3,RAN,RANGAP1,RPL3,RPL15,RPL27,RPL31,RPLP2,RPS10,RPS15,RPS15A,RPS20,RPS23,NPM3,CCT7,AHSA1,SNRPD2,EIF3K,TLN1,TPT1,UQCRC1
Pubmed	29911972	The multi-subunit GID/CTLH E3 ubiquitin ligase promotes cell proliferation and targets the transcription factor Hbp1 for degradation.	Pubmed	7.158E-10	1.029E-4	4.399E-7	5.479E-6	38	253	ALDOA,NOB1,CCAR2,BSG,SQSTM1,CKB,DDX54,BRMS1,RAN,SAP30L,UPF1,MYH14,MRTO4,RPL3,RPL18,RPL28,RPL31,RPL35A,STUB1,RPS15A,FASN,SEC13,MYBBP1A,SGTA,GET4,TIMM50,NUDC,RRP12,RRP7A,ICMT,TLE3,TUFM,HSPA1A,ZCCHC3,NOL6,BAG6,DDX39B,LGALS3BP
Pubmed	24344204	TIMMDC1/C3orf1 functions as a membrane-embedded mitochondrial complex I assembly factor through association with the MCIA complex.	Pubmed	7.438E-10	1.070E-4	4.533E-7	5.645E-6	24	112	ATP5ME,BAD,NDUFA2,NDUFA3,NDUFA6,NDUFA8,NDUFB6,NDUFB7,NDUFB8,NDUFB10,NDUFV1,NDUFS6,NDUFS8,NDUFV3,UQCR10,NDUFB11,COX5B,NDUFAF3,NDUFS7,NQO1,NDUFA12,UQCRC1,MTCH1,NDUFA11
Pubmed	20473970	Identification of FBXO25-interacting proteins using an integrated proteomics approach.	Pubmed	7.438E-10	1.070E-4	4.533E-7	5.645E-6	24	112	MARS,MYH9,CAD,PSMC3,PSMD3,PSMD4,DBN1,PHGDH,EEF2,MYH14,ENO1,RPS8,RPS27A,TUBB4B,FLII,CCT7,UNC45A,RUVBL2,GFAP,GSN,TUBB2A,HSPA5,VIM,IMPDH2
Pubmed	22922362	Transcription factor Foxp3 and its protein partners form a complex regulatory network.	Pubmed	7.639E-10	1.099E-4	4.635E-7	5.773E-6	47	358	ACACB,ADSL,AP2A1,DHX37,DBNL,CBX4,CCAR2,BAX,NFATC2,CAD,CCNB1,RRP9,PFKL,NOC4L,PLEC,DDX49,NOP53,POLD1,NOL12,FOXP4,SEC24C,CSNK1D,MAP2K2,ARPC1B,NOSIP,ETV3,NPM3,ZNF771,FASN,FEN1,PPIE,DDX41,SEC13,TBL3,ARFGAP2,MAP7D1,SNRNP70,STAT3,DMAP1,BOP1,GCN1,GSN,TLN1,PATZ1,PARK7,TFIP11,EXOSC5
Pubmed	26465331	Characterization of the Cardiac Overexpression of HSPB2 Reveals Mitochondrial and Myogenic Roles Supported by a Cardiac HspB2 Interactome.	Pubmed	8.077E-10	1.162E-4	4.881E-7	6.078E-6	27	140	ALDH2,ALDOA,PLIN4,SLC25A5,NDUFA6,NDUFB6,NDUFB8,SNU13,PHB,NDUFB11,DDIT4,DCTN1,SLC25A42,ENO1,RPL11,RPL36AL,MRPL12,SLC2A1,ATP5MG,ZNF335,OGDHL,UQCRQ,VIM,HSPG2,NDUFA11,NT5DC2,MLF2
Pubmed	24255178	Protein interaction network of the mammalian Hippo pathway reveals mechanisms of kinase-phosphatase interactions.	Pubmed	8.707E-10	1.252E-4	5.240E-7	6.525E-6	54	446	ACACB,AP2A1,AP2A2,NYNRIN,DOCK6,AMPD2,IRS2,BCL9L,BAD,ANKRD52,FMNL1,NOTCH1,NOTCH2,TRIM41,AIP,HGS,CEP170B,SRPRB,SLC9A3R2,PLOD1,CTNNB1,MAP2K2,TBKBP1,PSMC3,DBN1,PTPN14,HDAC5,SAMD4B,ECH1,KIF7,MAP1S,KIRREL1,BAIAP2,AMOTL2,PFDN6,AGAP3,CAMKK1,TCHP,CCDC85C,PPP6R1,TRIM32,TRAPPC3,NUDC,SNRPD2,KIF1C,SIPA1L3,RUVBL2,CDC42EP1,GIGYF1,TUBB2A,AMOTL1,FBF1,YWHAG,KLC4
Pubmed	26167880	SR protein kinases promote splicing of nonconsensus introns.	Pubmed	1.008E-9	1.449E-4	6.038E-7	7.520E-6	47	361	PNMA8B,ALDOA,SPTBN4,ASL,IRS2,BCL9L,AP1M1,FMNL1,NTHL1,PCBP1,SCAF1,ANKRD35,NOP53,KANK2,VSTM2L,ELP6,MAP1S,ENO1,MFSD10,RPL37,RPLP2,RPS26,TUBA1B,NAGK,POLDIP3,MAP7D1,SNRNP70,SIPA1L3,CDH23,PPP1R13L,CYP46A1,PHLDB1,RPUSD3,PRRC2B,HADH,CARHSP1,PATZ1,HMGA1,SBK1,FAM160B2,FBF1,MIB2,IMPDH2,ISLR,ITGA5,DDX39B,LMNA
Pubmed	26439863	Cell Surface Proteomic Map of HIV Infection Reveals Antagonism of Amino Acid Metabolism by Vpu and Nef.	Pubmed	1.027E-9	1.477E-4	6.128E-7	7.631E-6	26	132	ELFN2,NLGN2,LRFN1,SLC5A6,NOTCH1,CD81,PIEZO1,PTPRF,NECTIN1,EEF2,FGFR1,CCT7,SLC1A5,SLC9A1,SLC19A1,GART,PRRT3,TSPAN4,TNFRSF1A,HBB,IGSF8,HLA-A,TYRO3,RIC8A,SLCO4A1,CD82
Pubmed	25910212	Widespread macromolecular interaction perturbations in human genetic disorders.	Pubmed	1.047E-9	1.506E-4	6.223E-7	7.750E-6	55	461	HIST1H4I,HIST1H4A,HIST1H4D,HIST1H4F,HIST1H4C,HIST1H4H,AKT1,ALDOA,BFSP2,ATF4,CCND1,BANF1,SQSTM1,EIF2B4,EIF2B2,TRIM41,CBR3,CCND3,HGS,CD151,CDKN2D,TFPT,HOMER3,CRYBB1,TRAF4,PSMD3,KEAP1,CCM2,PYGB,PDCD6,RNF41,RPL11,SPRY2,RXRG,RACK1,AMOTL2,ISYNA1,ZCCHC12,SSSCA1,SGTA,NHP2,SLC2A1,TRIM32,FTH1,FTL,GFAP,STX4,EHMT2,GRN,SMIM3,HTR1B,INHA,TFIP11,COQ8A,BCAM
Pubmed	15952740	Protein profiling of human pancreatic islets by two-dimensional gel electrophoresis and mass spectrometry.	Pubmed	1.332E-9	1.916E-4	7.886E-7	9.821E-6	17	58	ALDOA,ANXA2,NME2,CALR,EEF2,PDIA6,ENO1,TUBB4B,RACK1,HYOU1,SOD1,GSTP1,TKT,TUFM,HSPA1A,HSPA5,HSPB1
Pubmed	23956138	Characterization of the EGFR interactome reveals associated protein complex networks and intracellular receptor dynamics.	Pubmed	1.345E-9	1.934E-4	7.925E-7	9.870E-6	31	183	MARS,AP2A1,AP2A2,EIF2B2,AP1M1,TBRG4,PFKL,AP1S1,PIK3R2,TNPO2,IPO13,CAVIN1,PHGDH,RANGAP1,IPO4,EXOC8,THEM6,TUBB4B,PHLDA1,TUBB,PPP6R1,TIMM50,TRAPPC3,NCDN,STAT3,NBEAL2,GCN1,CDC37,HBA2,TUBB2A,HSPA5
Pubmed	24366813	Interaction proteome of human Hippo signaling: modular control of the co-activator YAP1.	Pubmed	1.361E-9	1.958E-4	7.992E-7	9.953E-6	39	270	MPP2,FAM234B,ANXA2,PTOV1,ATP5F1D,ATP5PO,PXDC1,SQSTM1,EIF2B4,EIF2B2,PCBP1,POLR2E,PPP1R8,DYNLL2,PTPN14,PIH1D1,DVL1,DVL2,MAP1S,RBFA,STUB1,RPS15,FASN,AMOTL2,PFDN6,HYOU1,CCDC85C,CCT7,NUDC,PPP1R13L,RUVBL2,PARD6B,GSN,CDC37,SCRIB,AMOTL1,YWHAG,PDRG1,PLA2G12A
Pubmed	24965446	Host factors that interact with the pestivirus N-terminal protease, Npro, are components of the ribonucleoprotein complex.	Pubmed	1.375E-9	1.978E-4	8.040E-7	1.001E-5	20	81	EIF3I,UPF1,RPL3,RPL7A,RPL11,RPL15,RPL31,RPL35A,RPS2,RPS3,RPS4X,RPS5,RPS15A,RPS23,FARSA,EIF3L,SRP54,GSTM2,GSTP1,JUP
Pubmed	25900982	BioID-based Identification of Skp Cullin F-box (SCF)?-TrCP1/2 E3 Ligase Substrates.	Pubmed	1.449E-9	2.084E-4	8.436E-7	1.051E-5	35	226	CLPP,LRRC47,GADD45GIP1,MRPL15,FLCN,IRS2,NFE2L1,NFKBIA,NFKBIB,CDC34,KANK2,CTNNB1,KEAP1,DVL1,TPGS1,UPF1,MRPS18A,MRPL4,MAP1S,MRPL12,RPS10,RPS28,EMG1,PFDN6,TCHP,CCT7,NUDC,MAST3,BOP1,TRIOBP,HSPB1,YWHAG,MRPL38,JUP,RPSA
Pubmed	27371349	A Cyclin D2-derived peptide acts on specific cell cycle phases by activating ERK1/2 to cause the death of breast cancer cells.	Pubmed	1.601E-9	2.303E-4	9.284E-7	1.156E-5	18	66	H2AFV,EIF3B,EIF3F,EIF3I,CLIC1,PLEC,PSMB6,PSMC3,PSMD3,TRIM28,TUBA1B,TUBB4B,FLII,SGTA,GSN,COPE,HSPB1,RPSA
Pubmed	1602151	Treatment of Haemophilus aphrophilus endocarditis with ciprofloxacin.	Pubmed	1.640E-9	2.359E-4	9.473E-7	1.180E-5	21	90	MDH2,ALAD,ALDOA,ANXA2,SELENBP1,PHB,CKB,COL6A2,PTH1R,RAN,PDIA6,ENO1,RPLP0,RACK1,FSCN1,GFAP,GSTM2,HBB,HSPA5,HSPB1,LMNA
Pubmed	27107014	An inter-species protein-protein interaction network across vast evolutionary distance.	Pubmed	2.123E-9	3.053E-4	1.218E-6	1.517E-5	56	483	KCTD13,MIF4GD,MIF,C1QTNF1,ATF4,SQSTM1,CAMK2B,TRIM41,CBS,HGS,PAFAH1B3,TFPT,DCTPP1,HOMER3,NECAB2,TRAF4,SEC24C,MAPK7,KEAP1,ZMIZ2,DVL2,VPS37B,DNAL4,RNF41,BSCL2,SPRY2,SF3B4,ABI3,STUB1,EFS,AMOTL2,NAGK,SSSCA1,PUF60,SGTA,DRAP1,NHP2,HIF1AN,TRIM32,FTL,TRAPPC3,SNRPA,GAD1,GFAP,STX4,THRSP,DNPEP,UBC,FBF1,IMPDH2,ISL1,BAG6,PYCR3,AGTRAP,AIMP2,ZNF212
Pubmed	27068509	Extracellular matrix remodelling in response to venous hypertension: proteomics of human varicose veins.	Pubmed	2.127E-9	3.058E-4	1.218E-6	1.517E-5	27	146	MFGE8,MIF,LTBP4,ANXA2,APOE,COL1A2,COL6A2,CSPG4,PSAP,ECM1,FBLN1,FBLN2,SPARC,GDF10,TINAGL1,GPC1,GSN,TGFBI,TNXB,HSPG2,VWF,VWA1,LAMB1,LAMB2,LGALS3BP,LTBP3,BCAM
Pubmed	20029029	Regulation of epidermal growth factor receptor trafficking by lysine deacetylase HDAC6.	Pubmed	2.183E-9	3.139E-4	1.241E-6	1.545E-5	20	83	ALDOA,ARF6,OAZ1,AIP,CBR1,PPP5C,PSMA7,PSMD4,RUSC2,MEGF6,STUB1,FKBP4,AHSA1,HEXIM1,ADRM1,GABARAPL2,UCHL1,FKBP8,UROD,HSPA1A
Pubmed	29513653	Developmental diversification of cortical inhibitory interneurons.	Pubmed	2.183E-9	3.139E-4	1.241E-6	1.545E-5	20	83	MFGE8,ALDH2,NNAT,NOTCH1,NTN1,POU3F4,SLC32A1,CELSR1,CST3,DBI,DLX6,OLIG2,CITED2,MYBBP1A,ARX,GAD1,SPARC,CSDC2,WNT7B,ISL1
Pubmed	15047060	Analysis of proteins copurifying with the CD4/lck complex using one-dimensional polyacrylamide gel electrophoresis and mass spectrometry: comparison with affinity-tag based protein detection and evaluation of different solubilization methods.	Pubmed	2.510E-9	3.610E-4	1.421E-6	1.770E-5	16	53	ANXA2,EIF3B,EIF3I,PHB,EEF1B2,ENO1,RPL18,RPLP0,RPLP1,RPS9,RPS10,RPS12,TUBB,GNAI2,VIM,RPSA
Pubmed	24550385	Characterizing WW domain interactions of tumor suppressor WWOX reveals its association with multiprotein networks.	Pubmed	2.612E-9	3.757E-4	1.473E-6	1.835E-5	34	220	ANXA2,KHSRP,ZNF598,CAD,CPSF1,LSM4,DCTPP1,POLR2E,THOC6,SEC24C,LZTS3,EIF4A3,PTPN14,DVL1,DVL2,NOSIP,DAZAP1,ENO1,RPL6,FARSA,BAIAP2,CCT7,SNRPD2,HSD17B10,GABARAPL2,EDC4,AMOTL1,HSPA1A,HSPB1,TOE1,JUP,DDX39B,SF3A2,SYMPK
Pubmed	19165527	Prefrontal cortex shotgun proteome analysis reveals altered calcium homeostasis and immune system imbalance in schizophrenia.	Pubmed	2.734E-9	3.932E-4	1.530E-6	1.905E-5	20	84	AK1,APOE,PEBP1,CKB,TBCB,SLC9A3R1,PLEC,CNP,CRYM,RLBP1,STUB1,FARSA,TPPP3,LMNB2,UQCRC1,HSPA1A,HSPA5,VIM,ATCAY,TUBB2B
Pubmed	25670202	Ski regulates Hippo and TAZ signaling to suppress breast cancer progression.	Pubmed	2.734E-9	3.932E-4	1.530E-6	1.905E-5	20	84	SLC25A5,ATP5PO,SQSTM1,CAD,PLEC,PYGB,MVP,RPL18,RPLP0,RPS3,RPS4X,RPS16,TUBA1B,RACK1,TUBB,TUBB2A,TUFM,HSPA5,HSPG2,ITGB4
Pubmed	23438482	Proteomic analysis of the NOS2 interactome in human airway epithelial cells.	Pubmed	2.780E-9	3.998E-4	1.549E-6	1.928E-5	26	138	SLC25A5,NME2,CAD,PCBP1,SLC25A3,PLEC,QPCTL,PSMA7,PSMC3,PSMD3,PSMD4,PTBP1,RPL31,RPS3,RPS4X,FASN,CDIPT,CCT7,TIMM50,ZSWIM8,RUVBL2,ELOB,HSPA5,HSPB1,YWHAG,LGALS3BP
Pubmed	8799160	Chromosomal localization of the proteasome Z subunit gene reveals an ancient chromosomal duplication involving the major histocompatibility complex.	Pubmed	2.789E-9	4.011E-4	1.549E-6	1.928E-5	11	23	ABCA2,AK1,NOTCH1,NOTCH4,PSMB8,RXRA,FPGS,TAP1,TAP2,GSN,HSPA5
Pubmed	26792178	The ubiquitin ligase Ubr4 controls stability of podocin/MEC-2 supercomplexes.	Pubmed	3.150E-9	4.531E-4	1.743E-6	2.170E-5	17	61	RHPN1,TMEM176B,SLC25A5,ATP5PO,AXL,NOTCH2,KANK2,SLC25A10,PTPRF,EPHA2,KIRREL1,RPS3,IFITM3,HLA-A,PLXNB2,TUFM,TUBB2B
Pubmed	24816145	A COFRADIC protocol to study protein ubiquitination.	Pubmed	3.396E-9	4.885E-4	1.872E-6	2.331E-5	28	159	ADSL,ATP5PO,COX5B,POLR1C,AAR2,PSMA7,PSMB6,PTBP1,PHGDH,MRPS7,RPL28,RPLP0,FBL,RPS8,RPS12,RPS20,FARSA,HAX1,SGTA,PPP6R1,GET4,TRABD,TIMM50,PCID2,RUVBL2,NCDN,PRPF19,UBC
Pubmed	18307411	The tumour suppressor PTEN mediates a negative regulation of the E3 ubiquitin-protein ligase Nedd4.	Pubmed	4.002E-9	5.755E-4	2.197E-6	2.736E-5	22	103	MYH9,SERPINH1,PCBP1,SLC25A3,PSMC3,EEF1B2,EEF2,ENO1,RPL3,RPL11,RPL18,RPLP0,RPS3,TUBA1B,TUBB4B,FASN,RACK1,PUF60,TUBB,CCT7,HSPA5,TUBB2B
Pubmed	11044607	Large-scale screen for genes involved in gonad development.	Pubmed	4.502E-9	6.475E-4	2.462E-6	3.066E-5	18	70	KHSRP,PTOV1,CCND3,TBRG4,PIM1,AAR2,LRP10,CST3,PSMB6,ENO1,FTH1,SSBP4,FSCN1,SPARC,GRN,SEC61G,ID1,SLIRP
Pubmed	24244333	Profiling of Parkin-binding partners using tandem affinity purification.	Pubmed	4.624E-9	6.650E-4	2.519E-6	3.137E-5	32	203	SLC25A5,ANXA2,SRSF9,ATP5PO,CALR,SLC25A3,PRKCSH,MRPS7,PDIA6,RPL6,RPL7A,RPL8,RPLP0,MRPL12,RPS2,RPS8,RPS16,RPS20,RPS27A,TUBB4B,VAT1,TUBB,SLC25A1,RUVBL2,PRPF19,TUFM,HSPA1A,HSPA5,VGF,VIM,IMPDH2,LMNA
Pubmed	26527279	Analysis of the Histone H3.1 Interactome: A Suitable Chaperone for the Right Event.	Pubmed	4.779E-9	6.873E-4	2.594E-6	3.230E-5	30	182	MCM2,MBD3,GADD45GIP1,RPL36,CSTB,SF3B5,PSMD4,DBN1,RAN,IPO4,RPL7A,RPL27,RPL27A,RPL31,RPL37A,RPL39,RPS10,RPS12,RPS20,RPS21,RPS26,RPS27A,RPS28,CHERP,SNRNP70,SNRPD2,HSPA5,LMNA,BOLA2,SF3A2
Pubmed	25796446	Aerobic glycolysis tunes YAP/TAZ transcriptional activity.	Pubmed	5.230E-9	7.522E-4	2.828E-6	3.522E-5	28	162	SLC25A5,EIF3B,RPL10A,H1FX,CAD,SLC9A3R2,CNN2,CAVIN1,PTBP1,PHGDH,PTPN14,RAN,UPF1,RPL6,RPL7A,RPL15,RPL18,RPS4X,RPS8,EIF3L,AMOTL2,TUBB,CCDC85C,TGM2,AMOTL1,HSPB1,YWHAG,JUN
Pubmed	17361185	14-3-3sigma controls mitotic translation to facilitate cytokinesis.	Pubmed	5.259E-9	7.563E-4	2.833E-6	3.528E-5	20	87	EIF3I,PLEC,RPL7A,RPL8,RPL18,RPL27A,RPS2,RPS3,RPS8,RPS9,RPS15A,RPS16,RPS20,RPS21,RACK1,SNRPA,HIST1H2BB,VIM,IMPDH2,RPSA
Pubmed	22119785	Defining human ERAD networks through an integrative mapping strategy.	Pubmed	5.786E-9	8.321E-4	3.093E-6	3.852E-5	29	173	MCM2,AMFR,ARF3,ARF5,MYH9,AUP1,SERPINH1,PFKL,UBQLN2,POR,SLC25A10,TMED9,PSMA7,PSMB5,PSMB6,PSMD3,EMC10,EMC9,ENO1,TUBA1B,TUBB,SYVN1,GALK1,SURF4,GCN1,UBC,UBE2G2,MTCH1,TMEM201
Pubmed	15102471	Bioinformatics and cellular signaling.	Pubmed	5.786E-9	8.321E-4	3.093E-6	3.852E-5	29	173	ARHGDIA,SSNA1,BSG,SQSTM1,NFKBIA,NFKBIB,NME2,CAMK2B,PCBP1,CLIC1,PIK3R2,CTNNB1,PEX5,RAC3,EFS,PLEKHN1,RYR1,HMG20B,FBLN2,RACK1,HAX1,SREBF2,SRF,STAT3,MKNK2,TNFRSF1A,PATZ1,BAG6,MLF2
Pubmed	21362503	Protein profile of exosomes from trabecular meshwork cells.	Pubmed	6.373E-9	9.166E-4	3.395E-6	4.228E-5	15	49	MFGE8,ANXA2,MYH9,NT5E,COL1A2,MVP,ENO1,TUBB,GSN,TGFBI,TLN1,VIM,HSPG2,LAMB1,LGALS3BP
Pubmed	22944692	A catalogue of putative HIV-1 protease host cell substrates.	Pubmed	6.418E-9	9.230E-4	3.406E-6	4.242E-5	24	124	MDH2,ALDOA,AMPD2,ZNF598,CA12,RCC1,CTNNB1,CC2D1A,PTBP1,UPF1,EEF2,RNH1,ENO1,RPL3,RPL6,RPS23,TUBA1B,FKBP4,NHP2,RCC2,TKT,TSTA3,TUFM,VIM
Pubmed	20936779	A human MAP kinase interactome.	Pubmed	6.957E-9	1.001E-3	3.679E-6	4.581E-5	55	486	AES,MAP3K10,CCDC97,ARHGDIA,FHOD1,ATF4,MYH9,BAD,HGS,DYRK1B,ARHGAP33,PIK3R2,PLEC,SOGA1,MAPK7,MAP2K2,KIF26A,PSMD4,DAXX,DCTN1,TRIM28,TNK2,RPL7A,FAM53C,ENKD1,BAIAP2,SLC9A1,FTH1,SREBF2,GFAP,CIC,PARD6B,ZGPAT,GCN1,JADE2,MKNK2,CDC42EP1,SH3BP5L,ARL2BP,CDC42EP4,UBC,HRAS,USF2,HSPA1A,HSPA5,VWF,CLIP2,YWHAG,PAK6,ITGB4,JUN,JUP,HPS4,LAMB1,LAMB2
Pubmed	29091030	CHIP as a membrane-shuttling proteostasis sensor.	Pubmed	7.044E-9	1.013E-3	3.711E-6	4.621E-5	17	64	MAZ,ARHGAP33,NQO1,HSDL1,RPA2,RPL31,STUB1,BAIAP2,FOSL2,PRRC2B,INTS5,GIGYF1,SDF2L1,KIFC3,WDR34,LAMB2,MLF2
Pubmed	19692168	Genetic susceptibility to distinct bladder cancer subphenotypes.	Pubmed	7.453E-9	1.072E-3	3.912E-6	4.872E-5	50	422	METTL1,AKT1,ALAD,CCDC97,ALDH2,APOE,BAX,CCND1,BCR,NINJ1,NOS3,OGG1,CBR1,CBR3,CBS,CCND3,CD81,CDKN1A,PHB,PIM1,COMT,POLD1,MPDU1,CTNNB1,NQO1,HSPB8,PARP3,RET,NUBP2,EFNB3,RXRA,HIF1AN,SLC2A1,SLC19A1,COASY,SOD1,ALDH1L1,PPP1R13L,STK11,GSTP1,B9D2,TNFRSF1A,HTR1B,XRCC1,IRF3,PAK6,JAK3,AIMP2,LCAT,LRP5
Pubmed	19274049	A census of human transcription factors: function, expression and evolution.	Pubmed	7.852E-9	1.129E-3	4.106E-6	5.114E-5	85	908	MAFG,MAZ,MLLT1,FOXO4,THAP3,MNT,KLF15,ATF4,NFATC2,NFE2L1,MYRF,PBX2,TFCP2L1,NOC4L,POU3F1,POU3F4,ZNF385A,ATF6B,SOX13,FOXP4,MAFB,DLX6,OLIG1,RARG,TSC22D3,BOLA1,RELB,E4F1,RFX1,RFX2,EGR3,OLIG2,NR2F6,ZNF444,ESRRA,ETV3,RXRA,RXRG,KLF2,ZBTB7A,SALL2,FOXG1,FOXJ1,ATF5,CENPT,FOSB,FOSL2,ARX,DRAP1,SIX3,MXD4,KLF13,ZNF335,NKX6-2,SREBF1,SREBF2,SRF,CIC,STAT3,TCF3,HIF3A,THAP7,THRA,ZBTB48,CARHSP1,PATZ1,HMGA1,NR1H2,USF2…
Pubmed	25814554	Phospho-tyrosine dependent protein-protein interaction network.	Pubmed	7.920E-9	1.139E-3	4.127E-6	5.140E-5	49	410	KCTD13,MATK,AKT1,RANBP3,KLF15,MT2A,PELI3,PIK3R2,SH2B1,RIN1,CSK,VSTM2L,PRRG2,PSMD3,DBN1,CCM2,PARD6A,OLIG1,YPEL3,SH2B3,TNK2,SPRY2,DOK3,BAIAP2,ZNHIT1,SH3BP2,NHP2,DOK4,SPTB,FRS3,CYP46A1,AHDC1,ARID5A,STAT3,MLST8,PRRC2B,CYB561D2,OBSL1,TNS2,RCAN3,MAPK8IP2,RTL8B,HSPA1A,VASP,ID1,ISL1,JAK3,SPRY4,SYMPK
Pubmed	29150431	The E3 ubiquitin ligase APC/CCdh1 degrades MCPH1 after MCPH1-?TrCP2-Cdc25A-mediated mitotic entry to ensure neurogenesis.	Pubmed	9.106E-9	1.310E-3	4.728E-6	5.888E-5	17	65	AKR7A2,MT2A,EIF3F,SMOX,S100A16,POLD1,ZMIZ2,ENO1,FZR1,FBLN1,RACK1,EMG1,RUVBL2,OBSL1,TPT1,GABARAPL2,VIM
Pubmed	28071719	Quantitative proteomic profiling of the extracellular matrix of pancreatic islets during the angiogenic switch and insulinoma progression.	Pubmed	1.090E-8	1.568E-3	5.639E-6	7.022E-5	27	157	LTBP4,ANXA2,SERPINH1,CRELD1,COL1A2,COL6A2,COL9A2,CRELD2,CST3,CSTB,SPOCK2,ECM1,MEGF6,EGFL7,FBLN2,SPARC,SSPO,TINAGL1,TGFBI,TGM2,TNXB,PLXNB2,HSPG2,VWF,VWA1,LAMB1,LAMB2
Pubmed	16712791	Identification of intrahepatic cholangiocarcinoma related genes by comparison with normal liver tissues using expressed sequence tags.	Pubmed	1.097E-8	1.578E-3	5.656E-6	7.044E-5	53	466	H2AFV,ALDOA,BMF,BLOC1S2,RHOG,MT3,EIF3F,ATP1A3,ATP5F1E,NDUFB6,NDUFB7,BSG,HAP1,SERPINH1,CEP170B,CLIC1,BRMS1,GALNT9,PET100,DDOST,CHTF8,RAD9A,RPA2,IMP3,ZNF219,STUB1,RPS16,RPS20,TAX1BP3,FANCF,TUBB4B,TEX264,BAIAP2,PFDN6,FUZ,ANAPC11,NSUN5,SNRPD2,DMAP1,GJB1,BLCAP,SMPDL3B,MLC1,STRA6,LIMD2,THRSP,TKT,MEPCE,TSTA3,ATG101,TWNK,CD82,AIMP2
Pubmed	12617809	Expression of Notch pathway components in fetal and adult mouse small intestine.	Pubmed	1.267E-8	1.822E-3	6.508E-6	8.105E-5	9	16	MFNG,NOTCH1,NOTCH2,NOTCH4,DLL4,HES6,JAG2,DLL1,LFNG
Pubmed	26735018	An ID2-dependent mechanism for VHL inactivation in cancer.	Pubmed	1.391E-8	2.001E-3	7.104E-6	8.847E-5	11	26	DYRK1B,EGLN2,TUBA1B,TUBB4B,TUBB,ELOB,TCF3,HSPA1A,HSPA5,ID1,ID3
Pubmed	20211142	An atlas of combinatorial transcriptional regulation in mouse and man.	Pubmed	1.393E-8	2.003E-3	7.104E-6	8.847E-5	80	846	MAFG,PDLIM4,ATF4,LDB1,NFE2L1,NFKBIA,H1FX,TAF1C,AIP,PBX2,DEDD,TFCP2L1,ASB6,POLR2E,POLR2I,POU3F4,NCOR2,CTBP1,CTNNB1,DAXX,MAFB,OLIG1,HDAC5,TSC22D3,MED16,RELB,E4F1,RFX2,TRIM28,ZBTB3,NR2F6,ZNF219,CXXC1,RXRA,RXRG,TAX1BP3,HES6,FOXG1,FOXJ1,MYBBP1A,ATF5,HIF1AN,ZNF446,MXD4,PIAS4,KLF13,SSBP4,NKX6-2,HOPX,SREBF1,SREBF2,RUVBL2,CIC,CSDC2,STAT3,DMAP1,EHMT2,ELOB,TCF3,JADE2,THAP7,THRA,BRF1,ZBTB48,HMGN1,NR1H2,ID1,I…
Pubmed	25476789	Proteomic analysis and identification of cellular interactors of the giant ubiquitin ligase HERC2.	Pubmed	1.488E-8	2.139E-3	7.559E-6	9.414E-5	25	139	EIF3B,EIF3I,SOGA1,CTNNB1,MLEC,SCO2,EIF3L,AGAP3,FLII,MUS81,TRMT2A,FTH1,FTL,NEURL4,USP20,EIF3K,SLC27A4,OBSL1,LMNB2,HLA-A,COPE,HLA-E,RIC8A,MLF2,LMNA
Pubmed	16159877	Proteomic analysis of SRm160-containing complexes reveals a conserved association with cohesin.	Pubmed	1.565E-8	2.251E-3	7.928E-6	9.873E-5	28	170	MBD3,EIF3B,EIF3F,EIF3I,MYL6,SQSTM1,PLEC,PPP4C,SF3B5,EIF4A3,PTBP1,EEF1B2,OLIG2,RPL7A,SF3B4,MRPL12,RPS2,RPS5,PUF60,PPIL1,SNRPD2,RUVBL2,PRPF19,OGFR,HSPA1A,HSPB1,VIM,LMNA
Pubmed	15010206	A collection of cDNAs enriched in upper cortical layers of the embryonic mouse brain.	Pubmed	1.579E-8	2.271E-3	7.967E-6	9.922E-5	15	52	NDUFB8,NRXN2,DHX34,PSMB6,MRC2,PYGB,HSDL1,TMEM176A,TEX264,NUDT22,PDCD11,PHLDB1,CIAO3,FIZ1,COQ8A
Pubmed	23000965	Systems-wide analysis of ubiquitylation dynamics reveals a key role for PAF15 ubiquitylation in DNA-damage bypass.	Pubmed	1.973E-8	2.837E-3	9.910E-6	1.234E-4	26	151	ATP5PO,PHB,COX5B,AAR2,PSMA7,PSMB5,PTBP1,PHGDH,KCTD10,RPL28,RPLP0,RPLP2,FBL,RPS8,RPS12,RPS20,HAX1,SGTA,TRABD,TIMM50,CYB5R1,RUVBL2,NCDN,PRPF19,UBC,HSPB1
Pubmed	28031328	Interactome Analysis Reveals a Novel Role for RAD6 in the Regulation of Proteasome Activity and Localization in Response to DNA Damage.	Pubmed	1.978E-8	2.844E-3	9.910E-6	1.234E-4	24	131	HIST1H2BC,ANXA2,EIF3F,RPL10A,NFKBIL1,AP1M1,CNP,TBC1D10B,TES,EIF4A3,PSMD3,KEAP1,DCTN1,RPS9,RPS15A,RPS23,NPM3,PUF60,RNF123,GCN1,GSTP1,NISCH,U2AF2,LGALS3BP
Pubmed	25241761	Using an in situ proximity ligation assay to systematically profile endogenous protein-protein interactions in a pathway network.	Pubmed	2.037E-8	2.930E-3	1.017E-5	1.266E-4	45	371	AKT1,ATF4,BAD,FADD,BAX,CCND1,BCR,NFKBIB,NOS3,CALR,CCNB1,CCND3,CDKN1A,TAOK2,TRAF4,CSF2RA,CSNK1D,PRKCD,CTNNB1,DAXX,DFFA,DUSP4,DVL1,RELB,RET,RXRA,FZR1,FGFR1,ANAPC11,GNB5,STAT3,STK11,GNAI2,GNG7,MKNK2,GSTP1,TNFRSF1A,HRAS,HSPA1B,VASP,HSPB1,JUN,JUP,CD82,FZD5
Pubmed	28416769	Nuclear organization of nucleotide excision repair is mediated by RING1B dependent H2A-ubiquitylation.	Pubmed	2.043E-8	2.938E-3	1.017E-5	1.266E-4	22	112	HIST1H4A,RPL10A,RPL3,RPL7A,RPL8,RPL11,RPL15,RPL27,RPL28,RPL35A,RPLP0,FBL,RPS3,RPS4X,RPS8,RPS9,RPS16,MYBBP1A,PDCD11,PRPF19,HSPA1A,VIM
Pubmed	11751223	Differential expression of genes coding for ribosomal proteins in different human tissues.	Pubmed	2.122E-8	3.052E-3	1.052E-5	1.311E-4	7	9	RPL27A,RPL28,RPS2,RPS5,RPS9,RPS10,RPS29
Pubmed	19741146	A genome-wide screen for spatially restricted expression patterns identifies transcription factors that regulate glial development.	Pubmed	2.158E-8	3.103E-3	1.066E-5	1.328E-4	20	94	FOXO4,KLF15,PDLIM4,ATF4,CNP,ATF6B,CSRP2,CTNNB1,OLIG1,OLIG2,RXRA,HMG20B,SALL2,FOXJ1,SREBF1,GFAP,TCF3,NR1H2,ID1,ID3
Pubmed	27751915	Defining the Na(+)/H(+) exchanger NHE1 interactome in triple-negative breast cancer cells.	Pubmed	2.215E-8	3.186E-3	1.091E-5	1.359E-4	14	46	AKT1,ALDOA,ARHGDIA,EIF3F,CALR,CLIC1,ENO1,SLC9A1,TKT,TLN1,UBC,HSPA1A,HSPA5,RPSA
Pubmed	10810093	Identification of novel human genes evolutionarily conserved in Caenorhabditis elegans by comparative proteomics.	Pubmed	2.270E-8	3.265E-3	1.114E-5	1.388E-4	26	152	AAR2,AMDHD2,SLC35C2,FAHD2A,ISOC1,EMC9,MRPS16,FIS1,PAM16,BOLA1,NOSIP,MRPL4,TMX2,APH1A,TRAPPC4,CNPPD1,GET4,ERGIC3,TMBIM4,PPIL1,CIAO2B,TPPP3,SLC39A1,RUVBL2,RRP7A,MTCH1
Pubmed	19875381	A proteomic investigation of ligand-dependent HSP90 complexes reveals CHORDC1 as a novel ADP-dependent HSP90-interacting protein.	Pubmed	2.370E-8	3.408E-3	1.159E-5	1.444E-4	16	61	POLR2E,PPP5C,PIH1D1,STUB1,FKBP4,FKBP5,FLII,AHSA1,NUDC,UNC45A,USP19,CDC37,SCRIB,HSPA1A,HSPA5,MLF2
Pubmed	20436479	A genomic atlas of mouse hypothalamic development.	Pubmed	2.450E-8	3.524E-3	1.194E-5	1.487E-4	30	195	MFNG,MAGEH1,CCND1,NOS1,TSR3,CNTFR,CARTPT,CRYM,NCAN,CTNNB1,DUSP4,PTPRU,OLIG2,SEZ6,SPRY2,FGFR1,FOXG1,ARX,GAD1,NKX6-2,SRF,GDF10,INTS5,THRSP,VIM,WNT7A,WNT7B,ISL1,LTBP3,SPATA13
Pubmed	23752268	The functional interactome landscape of the human histone deacetylase family.	Pubmed	2.473E-8	3.557E-3	1.202E-5	1.496E-4	38	287	MBD3,CCAR2,ATP2A3,H1FX,CAD,TRMT61A,RCC1,CHD3,PHB,CPSF1,BRMS1,MIER2,NCOR2,SLC25A10,CTBP1,CROCC,SLC25A42,HDAC5,SAP30L,HDAC11,HMG20B,DDX41,PFDN6,PUF60,CCT7,PPP6R1,TIMM50,PDCD11,SNRNP70,TNRC18,EHMT2,RRP12,GCN1,SIN3B,DNAJB2,YWHAG,TFIP11,MLF2
Pubmed	19948975	Integrative predictive model of coronary artery calcification in atherosclerosis.	Pubmed	2.592E-8	3.728E-3	1.255E-5	1.563E-4	33	229	ADORA2A,AKT1,ALDH2,ALOX5AP,AMPD2,APOE,NFKBIA,NFKBIB,CACNA1H,NOS3,CBS,PDYN,PLTP,CANT1,DMPK,ELN,FEM1A,SLC2A1,SCAP,SREBF1,SREBF2,GSTP1,THBD,TNFRSF1A,UCP2,NR1H2,ATG9B,VWF,ID3,LCAT,LMNA,LRP1,LRP5
Pubmed	22354994	Biochemical and phosphoproteomic analysis of the helix-loop-helix protein E47.	Pubmed	2.601E-8	3.741E-3	1.255E-5	1.563E-4	23	123	HIST1H4I,HIST1H4F,HIST1H4C,HIST1H4H,LSM2,ATP2A3,SERPINH1,PCBP1,SLC9A3R1,SLC25A10,PDCD6,EEF1B2,RPL7A,RPL27A,RPL31,FBL,RPS3,TIMM50,TCF3,PARK7,ID1,ID3,RPSA
Pubmed	15604093	Automated yeast two-hybrid screening for nuclear receptor-interacting proteins.	Pubmed	2.685E-8	3.862E-3	1.292E-5	1.608E-4	24	133	FHOD1,CAMK2B,CHMP1A,NECAB2,NCOR2,DAXX,DCTN1,TMEM161A,RARG,NR2F6,ESRRA,RXRA,RXRG,HAX1,CIB1,SHMT2,FTH1,GSN,THRA,GABARAPL2,NR1H2,VIM,ITGB5,LAMB1
Pubmed	27507650	Long-term potentiation modulates synaptic phosphorylation networks and reshapes the structure of the postsynaptic interactome.	Pubmed	2.745E-8	3.949E-3	1.316E-5	1.639E-4	34	241	CASKIN1,NLGN2,BEGAIN,MPP2,GIT1,ARF3,ARF5,SPTBN4,SYNGAP1,CAMK2B,TAOK2,HOMER3,CNP,MINK1,NCAN,CTNNB1,DCTN1,DLG4,RACK1,BAIAP2,AGAP2,DLGAP4,PPP6R1,FSCN1,DDN,NCDN,GSN,PARK7,YWHAG,SHANK3,TUBB2B,KCNA3,SFXN3,LRP1
Pubmed	25464930	Novel interactive partners of neuroligin 3: new aspects for pathogenesis of autism.	Pubmed	2.781E-8	3.999E-3	1.329E-5	1.655E-4	15	54	AP2A2,FHOD1,CCAR2,ATF4,TPRA1,OAZ1,PSAP,MAP1S,EFS,FBLN1,MIEN1,SPINT1,ACOT2,GUK1,UQCRC1
Pubmed	18973680	Microarray analysis of Foxa2 mutant mouse embryos reveals novel gene expression and inductive roles for the gastrula organizer and its derivatives.	Pubmed	2.977E-8	4.281E-3	1.418E-5	1.766E-4	37	277	PPP1R14A,ACVR2B,MDK,TRRAP,PREX1,KHSRP,PDLIM4,PTOV1,MRPL15,NNAT,H1FX,NPTX2,PIM1,CNN2,UFSP1,KDM4A,SF3B5,CYB561,PYGB,CTDSP2,RNF41,RPL31,FLT4,HYOU1,AGPAT1,SLC1A5,SLC2A1,SPINT2,SPARC,PHLDB1,ZC3H4,PCSK1N,PDLIM2,UNC119B,JOSD2,PRMT1,AGTRAP
Pubmed	25756610	DNA damage shifts circadian clock time via Hausp-dependent Cry1 stabilization.	Pubmed	2.991E-8	4.301E-3	1.420E-5	1.768E-4	28	175	MARS,SLC25A5,KHSRP,ATP1A3,PCBP1,DCTPP1,CNP,PSMC3,PSMD3,PTBP1,PHGDH,RAN,EEF2,TRIM28,RPS2,RPS3,RPS27A,FASN,TUBB,RUVBL2,GCN1,NXN,TUFM,PRMT1,HSPA1A,HSPA1B,HSPA5,IMPDH2
Pubmed	20618440	Proteomic and biochemical analysis of 14-3-3-binding proteins during C2-ceramide-induced apoptosis.	Pubmed	3.085E-8	4.437E-3	1.455E-5	1.812E-4	19	87	HIST1H4I,HIST1H4A,HIST1H4D,HIST1H4F,HIST1H4C,HIST1H4H,DBNL,MYH9,BAD,RPS3,P3H4,STAT3,TUBB2A,VASP,HSPB1,VIM,DIABLO,YWHAG,LMNA
Pubmed	19515997	Conditional mutations of beta-catenin and APC reveal roles for canonical Wnt signaling in lens differentiation.	Pubmed	3.085E-8	4.437E-3	1.455E-5	1.812E-4	19	87	FZD1,FZD8,AES,CCND1,CCND3,SLC9A3R1,CSNK1D,CTBP1,CTNNB1,FRAT1,DVL1,DVL2,FZD2,WNT2,WNT7A,WNT7B,JUN,FZD5,LRP5
Pubmed	23349634	A newly uncovered group of distantly related lysine methyltransferases preferentially interact with molecular chaperones to regulate their activity.	Pubmed	3.571E-8	5.136E-3	1.679E-5	2.090E-4	25	145	MDH2,METTL1,HIST1H4F,ALDOA,CCAR2,EIF3I,H1FX,SERPINH1,GRWD1,EEF2,PDIA6,RPL3,PFDN6,CCT7,RNF126,SNRPD2,RUVBL2,EIF3K,TUBB2A,UBC,HSPA1A,HSPA1B,HSPA5,TUBB2B,BAG6
Pubmed	17220478	Proteomics analysis of the interactome of N-myc downstream regulated gene 1 and its interactions with the androgen response program in prostate cancer cells.	Pubmed	3.903E-8	5.614E-3	1.829E-5	2.277E-4	16	63	CTNNB1,PSMC3,UPF1,EEF2,RPL3,RPS3,RPS8,RPS9,RPS16,RPS20,RPS26,FASN,SHMT2,RUVBL2,TLE3,HSPA5
Pubmed	21244100	Protein array based interactome analysis of amyloid-? indicates an inhibition of protein translation.	Pubmed	4.245E-8	6.105E-3	1.982E-5	2.469E-4	39	305	THAP3,PDZD4,NOB1,NTMT1,ARL4D,ATP5PO,IER3,TRIM41,HGS,DEDD,ABT1,LMF2,DDX54,RPL36,DDX49,GTPBP1,CSNK1D,MAPK7,PARD6A,OCEL1,MRPS18A,RPL11,MTG1,RPL31,RPL41,RPS10,ETV3,RPS16,RPS26,FES,TRIM46,MYBBP1A,TRMT2A,RPUSD2,SNRNP70,HMGA1,ZNF574,PAK6,KLC4
Pubmed	23382219	Structural basis for endosomal trafficking of diverse transmembrane cargos by PX-FERM proteins.	Pubmed	4.535E-8	6.522E-3	2.111E-5	2.629E-4	20	98	ADCYAP1R1,AMFR,BCR,NOTCH1,NOTCH2,DDR1,TAOK2,SNX17,GPR101,RET,FGFR1,FLT4,NT5DC3,GPRC5C,TNFRSF1A,HRAS,ITGB4,ITGB5,ITPR3,LRP1
Pubmed	12693553	Prediction of the coding sequences of mouse homologues of KIAA gene: II. The complete nucleotide sequences of 400 mouse KIAA-homologous cDNAs identified by screening of terminal sequences of cDNA clones randomly sampled from size-fractionated libraries.	Pubmed	4.934E-8	7.096E-3	2.289E-5	2.851E-4	46	395	ADCY3,SLC12A5,UNC5A,ULK1,ZNF319,KIF17,CCAR2,CACNA1H,BAIAP3,CEP170B,SEC24C,ACOT11,CROCC,CLSTN3,TMEM94,SPOCK2,SPATA2,RUSC2,C2CD2L,SV2A,HDAC5,ATP9A,SPEG,DLGAP4,PPP6R1,MAP7D1,SLIT1,SYVN1,FAIM2,TOB2,DDN,NCDN,USP19,ZCCHC14,PHLDB1,PLEKHM2,MLC1,RRP12,PACS2,PRRC2B,TLE3,TLN1,SH3BP5L,SCRIB,EIF4H,SPATA13
Pubmed	21907836	Interactome study suggests multiple cellular functions of hepatoma-derived growth factor (HDGF).	Pubmed	5.595E-8	8.047E-3	2.588E-5	3.222E-4	29	191	HIST1H4I,HIST1H2BE,HIST1H2BC,HIST1H4A,HIST1H4D,HIST1H4F,HIST1H4C,HIST1H4H,SLC25A5,H1FX,RCC1,SLC25A3,POLRMT,GTPBP1,RAN,GRWD1,EEF2,MRTO4,RPL35A,FBL,RPS15A,RPS23,MYBBP1A,POLDIP3,NUDC,RCC2,HSD17B10,U2AF2,HMGN1
Pubmed	15747579	Construction of a multi-functional cDNA library specific for mouse pancreatic islets and its application to microarray.	Pubmed	5.741E-8	8.257E-3	2.647E-5	3.296E-4	37	284	LTBP4,BAHCC1,LRRC61,ATOX1,EIF3I,RTL5,NDUFS8,HIP1R,CTDSP1,OXTR,PFKL,SLC25A3,ATF6B,RPL11,RPL37A,SGSM1,ETV3,FARSA,SLC8B1,FEM1A,FBXW9,FBXO21,AGO2,USP19,PRRC2B,JADE2,TRIOBP,FICD,THBS3,HLA-A,HLA-E,PLXNB2,SLC35A4,ITPR3,ABCC10,KLC4,LGALS3BP
Pubmed	24927181	Genome-wide association study identifies three novel susceptibility loci for severe Acne vulgaris.	Pubmed	5.856E-8	8.422E-3	2.691E-5	3.351E-4	26	159	EHBP1L1,CPNE5,MDGA1,BANF1,FIBP,PCBP1,PIM1,CRELD2,PIM3,FRMD8,RPL15,SGSM1,EIF1AD,MUS81,DRAP1,TRABD,PPIL1,SNRPG,GGT5,MLC1,TMEM119,FICD,PLXNB2,MTCH1,PANX2,LTBP3
Pubmed	16944949	Identification of 14-3-3epsilon substrates from embryonic murine brain.	Pubmed	6.549E-8	9.419E-3	3.000E-5	3.736E-4	23	129	GIT1,SLC25A5,DBNL,CACNB1,CBR1,CBR3,ARHGAP33,PIK3R2,HOMER3,DBN1,DMWD,EEF1B2,TRIM28,RPLP0,RPS3,BAIAP2,TRIM32,BRSK1,PACS2,SRCIN1,GIGYF1,YWHAG,KLC4
Pubmed	19554387	The treasury of the commons: making use of public gene expression resources to better characterize the molecular diversity of inhibitory interneurons in the cerebellar cortex.	Pubmed	6.654E-8	9.570E-3	3.038E-5	3.784E-4	19	91	CYGB,SLC12A5,CHST1,CABP7,NTN1,HOMER3,SLC32A1,PRKCD,NRSN2,BCAN,NSG2,NSG1,GAD1,STARD5,CDH22,SBK1,VGF,LRRTM1,LAMB1
Pubmed	18816836	Mouse Fem1b interacts with the Nkx3.1 homeoprotein and is required for proper male secondary sexual development.	Pubmed	7.668E-8	1.103E-2	3.490E-5	4.346E-4	10	24	PEBP1,PTMS,CHPF,RARG,RPL37A,HMG20B,TEX264,CCT7,TPT1,RPSA
Pubmed	15449545	Prediction of the coding sequences of mouse homologues of FLJ genes: the complete nucleotide sequences of 110 mouse FLJ-homologous cDnas identified by screening of terminal sequences of cDNA clones randomly sampled from size-fractionated libraries.	Pubmed	7.930E-8	1.140E-2	3.597E-5	4.479E-4	18	83	MYH9,CARMIL3,NFE2L1,ZNF598,DPP9,SH3TC1,UAP1L1,PLEKHG4,KLHL36,ARMC5,WDR81,PEAR1,MXD4,ARHGEF40,TRABD,ABCC10,RGL3,LTBP3
Pubmed	11543634	The human mitochondrial ribosomal protein genes: mapping of 54 genes to the chromosomes and implications for human disorders.	Pubmed	7.953E-8	1.144E-2	3.597E-5	4.479E-4	15	58	MRPL15,MRPS16,MRPS18A,MRPL4,MRPS7,IMP3,MRPL12,MRPS12,MRPL27,MRPL28,MRPL17,MRPL14,MRPS24,MRPL38,MRPL9
Pubmed	16027165	Akt-mediated valosin-containing protein 97 phosphorylation regulates its association with ubiquitinated proteins.	Pubmed	8.212E-8	1.181E-2	3.702E-5	4.611E-4	11	30	AKT1,ALDOA,PEBP1,CKB,ENO1,ENO2,TUBB,HBB,UCHL1,HSPA5,YWHAG
Pubmed	26472760	Gene essentiality and synthetic lethality in haploid human cells.	Pubmed	8.709E-8	1.253E-2	3.914E-5	4.875E-4	32	229	MARS,AP2A1,AP2A2,MYL6,PHB,AP2S1,NLE1,AAR2,CTNNB1,MLEC,PSMA7,PSMB5,DDOST,IER3IP1,IMP3,RPL27A,RPL28,RPLP2,RPS15,VPS52,EIF3L,MYBBP1A,PUF60,CCT7,SMARCB1,NCDN,MEPCE,COPE,SLC35A2,FKBP8,AIMP2,RAB1B
Pubmed	28656980	Neurovascular EGFL7 regulates adult neurogenesis in the subventricular zone and thereby affects olfactory perception.	Pubmed	8.955E-8	1.288E-2	4.012E-5	4.996E-4	9	19	NOTCH1,NOTCH2,NOTCH4,CHAT,DLL4,EGFL7,GFAP,JAG2,DLL1
Pubmed	16130169	Proteomics of human umbilical vein endothelial cells applied to etoposide-induced apoptosis.	Pubmed	9.105E-8	1.309E-2	4.067E-5	5.064E-4	17	75	ARHGDIA,CALR,PHB,CLIC1,PDIA6,TUBB4B,TUBB,GSTP1,TPT1,UCHL1,HSPA1A,HSPA1B,HSPA5,HSPB1,VIM,WARS,RPSA
Pubmed	21926972	Large-scale genome-wide association analysis of bipolar disorder identifies a new susceptibility locus near ODZ4.	Pubmed	9.145E-8	1.315E-2	4.072E-5	5.071E-4	20	102	BAP1,FOXO6,CNIH2,NPAS4,PELI3,CA11,GLYCTK,BRMS1,RIN1,PRKCD,SYT12,DPP3,RPL18,STAB1,NISCH,NT5DC2,SPHK2,SEMA3G,LMAN2L,RAB1B
Pubmed	25281560	Proximity biotinylation and affinity purification are complementary approaches for the interactome mapping of chromatin-associated protein complexes.	Pubmed	9.193E-8	1.322E-2	4.081E-5	5.082E-4	63	636	MEN1,LRRC47,ADSL,AP2A1,VPS18,GIT1,CBX4,CCDC61,ARF5,SSNA1,ATP6V1B2,EDF1,BANF1,SQSTM1,WRAP73,SERPINH1,DYRK1B,PHB,TBCB,CNP,DDX49,KANK2,DYNLL2,CTBP1,KEAP1,PDCD6,MED16,DVL2,ECH1,KIF7,RING1,PDIA6,MYH14,PLIN3,RPS10,NPM3,FLII,ZNF703,CENPT,TCHP,RNASEH2A,MUS81,YJU2,MED28,SNRPG,SRP54,RCC2,EHMT2,MED22,ACOT2,ZNF503,TLN1,SCRIB,HBA2,HBB,EDC4,HAUS8,MED11,EIF4H,XRCC1,MANF,BAG6,MED25
Pubmed	22496890	Short-chain 3-hydroxyacyl-coenzyme A dehydrogenase associates with a protein super-complex integrating multiple metabolic pathways.	Pubmed	1.019E-7	1.466E-2	4.510E-5	5.616E-4	22	122	ACADS,ACADVL,ACY1,ALAD,ALDOA,ASL,NDUFV1,ATP6V1F,CKB,CST3,PSMB5,PYGB,ASPG,ECH1,ENO1,ENO2,SDHB,GSTP1,HSD17B10,HADH,HMGCL,IVD
Pubmed	27542412	Destabilization of Atoh1 by E3 Ubiquitin Ligase Huwe1 and Casein Kinase 1 Is Essential for Normal Sensory Hair Cell Development.	Pubmed	1.120E-7	1.610E-2	4.940E-5	6.152E-4	17	76	TRRAP,PDXK,CCDC124,BCKDHA,SERPINH1,PLEC,CSNK1D,ENO1,RPL3,AHSA1,AGO2,GFAP,TCF3,TUBB2A,TUFM,NT5DC2,TUBB2B
Pubmed	11042152	Cloning and functional analysis of cDNAs with open reading frames for 300 previously undefined genes expressed in CD34+ hematopoietic stem/progenitor cells.	Pubmed	1.197E-7	1.721E-2	5.264E-5	6.556E-4	39	317	ARF6,MRPL15,ORMDL2,RANGRF,AUP1,NDUFA2,NDUFA3,NDUFB2,NDUFB6,NDUFB8,NDUFB10,UQCR10,RPL36,MPDU1,POLR1C,ATP6V1G1,GTPBP1,PSMA7,RAN,MRPS7,IER3IP1,SERF2,HGH1,MRPL27,EIF3L,TRAPPC4,ANAPC11,NHP2,AHSA1,ATP5MG,KBTBD4,TMBIM4,CIAO2B,EIF3K,TMEM9,SEC61G,TFIP11,ITM2C,ORMDL3
Pubmed	15498874	Large-scale cDNA transfection screening for genes related to cancer development and progression.	Pubmed	1.354E-7	1.947E-2	5.936E-5	7.392E-4	21	114	KCTD13,DBNL,PYGO2,TRIM41,LRP10,UBALD1,ABHD11,CCM2,LAMTOR1,HSPB8,FAM57B,MYH14,FBLN1,PRR5,RNF123,TINAGL1,PDLIM2,NEU4,MFSD2A,GDPD5,COQ8A
Pubmed	21041608	Family-based analysis of genetic variation underlying psychosis-inducing effects of cannabis: sibling analysis and proband follow-up.	Pubmed	1.404E-7	2.020E-2	6.139E-5	7.646E-4	13	45	ADRA2C,AKT1,CHST1,NOS1,COMT,PRODH,NQO1,PPP1R1B,FGFR1,FKBP5,GAD1,EHMT2,LRRTM1
Pubmed	9507200	Isolation of genes identified in mouse renal proximal tubule by comparing different gene expression profiles.	Pubmed	1.409E-7	2.026E-2	6.141E-5	7.647E-4	18	86	SLC25A5,NME2,SELENBP1,MAP2K2,CYBA,DBI,ECM1,ENO1,RPL27A,RPLP0,RPS2,RPS8,RPS15,RPS28,RACK1,FTH1,SRP54,IMPDH2
Pubmed	12971992	Expression of Notch pathway genes in the embryonic mouse metanephros suggests a role in proximal tubule development.	Pubmed	1.475E-7	2.122E-2	6.410E-5	7.983E-4	8	15	MFNG,NOTCH1,NOTCH2,NOTCH4,DLL4,JAG2,DLL1,LFNG
Pubmed	27637333	Identification of Novel Nuclear Factor of Activated T Cell (NFAT)-associated Proteins in T Cells.	Pubmed	1.617E-7	2.326E-2	7.005E-5	8.724E-4	27	178	MAFG,MCM2,MDH2,TRRAP,LRRC47,MBD3,NFATC2,CAD,CNP,POLR1C,CSNK1D,CTBP1,PHGDH,RFC2,EEF2,RPA2,MRPL17,TIMM50,NUDC,TUFM,HSPA1A,HSPA5,XRCC1,YWHAG,JUN,JUND,MAFK
Pubmed	15345747	Phosphoproteomic analysis of the developing mouse brain.	Pubmed	1.761E-7	2.532E-2	7.603E-5	9.469E-4	32	236	MCM2,CCAR2,EIF3B,SAMD14,SQSTM1,PALM,PCDH1,PDE1B,CAMKV,KCTD15,UBQLN2,PSMD4,DBN1,PARD6A,TMCC2,LAMTOR1,EXOC8,EEF1B2,RPS10,RTN2,MYBBP1A,DLGAP4,SSBP4,SNRNP70,CIC,DMAP1,SRCIN1,CDC42EP1,SCRIB,VIM,ZFAND2B,USP5
Pubmed	19815544	Regulated endoplasmic reticulum-associated degradation of a polytopic protein: p97 recruits proteasomes to Insig-1 before extraction from membranes.	Pubmed	1.772E-7	2.549E-2	7.612E-5	9.480E-4	11	32	AMFR,UBQLN2,PSMA7,PSMC3,PSMD4,ENO1,ADRM1,HSPA1A,HSPA5,JUP,BAG6
Pubmed	12866128	Notch-associated gene expression in embryonic and adult taste papillae and taste buds suggests a role in taste cell lineage decisions.	Pubmed	1.784E-7	2.565E-2	7.612E-5	9.480E-4	7	11	NOTCH1,NOTCH2,NOTCH4,HES6,UCHL1,JAG2,DLL1
Pubmed	10878608	Localisation of members of the notch system and the differentiation of vibrissa hair follicles: receptors, ligands, and fringe modulators.	Pubmed	1.784E-7	2.565E-2	7.612E-5	9.480E-4	7	11	MFNG,NOTCH1,NOTCH2,NOTCH4,JAG2,DLL1,LFNG
Pubmed	24424410	USP13 antagonizes gp78 to maintain functionality of a chaperone in ER-associated degradation.	Pubmed	1.784E-7	2.565E-2	7.612E-5	9.480E-4	7	11	AMFR,SGTA,GET4,UBC,UBE2G2,BAG6,USP5
Pubmed	19190083	Characterization of exosome-like vesicles released from human tracheobronchial ciliated epithelium: a possible role in innate defense.	Pubmed	1.870E-7	2.690E-2	7.959E-5	9.912E-4	13	46	MIF,ANXA2,MYL6,SLC9A3R1,CLIC1,RPS27A,CIB1,GPRC5C,GSTP1,TKT,UBC,HSPA1A,HSPA1B
Pubmed	17110338	Hsp90 cochaperone Aha1 downregulation rescues misfolding of CFTR in cystic fibrosis.	Pubmed	1.995E-7	2.870E-2	8.465E-5	1.054E-3	28	191	ATP2A3,BCR,CAPNS1,SLC9A3R2,SLC9A3R1,CSTB,PSAP,PSMC3,RAN,PDCD6,CCDC51,THEM6,FARSA,RACK1,HAX1,AHSA1,RUVBL2,GNA11,GNAI2,ELOB,GRN,CDC37,FKBP8,HSPA1A,HSPA5,HSPB1,LMNA,SFXN3
Pubmed	21987572	Ubiquitin ligase substrate identification through quantitative proteomics at both the protein and peptide levels.	Pubmed	2.036E-7	2.928E-2	8.611E-5	1.072E-3	18	88	PSMA7,PSMB6,PTBP1,PHGDH,GRWD1,RPL28,RPLP0,RPS8,RPS20,FARSA,HAX1,SGTA,TIMM50,SYVN1,PCID2,RUVBL2,UBC,HSPB1
Pubmed	21525035	PEX14 is required for microtubule-based peroxisome motility in human cells.	Pubmed	2.077E-7	2.987E-2	8.761E-5	1.091E-3	14	54	PEX10,PEX16,CNP,MAP2K2,DCTN1,PEX5,TUBA1B,TUBB4B,TUBB,CCT7,DHRS4,TUBB2A,IMPDH2,TUBB2B
Pubmed	25826454	Expression of the immunoglobulin superfamily cell adhesion molecules in the developing spinal cord and dorsal root ganglion.	Pubmed	2.448E-7	3.521E-2	1.029E-4	1.282E-3	22	128	IGSF9,LRFN1,AXL,BSG,CHAT,ADGRA2,LRFN3,PTPRF,NECTIN1,PTPRU,KIRREL1,OLIG2,SPEG,VSTM2B,IGSF8,LRRC24,CADM4,TYRO3,IGSF3,ISL1,ISLR,BCAM
Pubmed	12529303	Reevaluating human gene annotation: a second-generation analysis of chromosome 22.	Pubmed	2.541E-7	3.655E-2	1.066E-4	1.327E-3	11	33	NOL12,SCO2,DNAL4,POLDIP3,PRR5,TRABD,PNPLA3,MAPK8IP2,PIK3IP1,TFIP11,HPS4
Pubmed	16263121	A proteomic snapshot of the human heat shock protein 90 interactome.	Pubmed	2.686E-7	3.863E-2	1.123E-4	1.399E-3	12	40	ALDOA,MYH9,NANS,PSMB5,EEF2,RPLP0,RPS4X,FASN,GNAI2,C12orf10,HSPA1A,RPSA
Pubmed	24332808	PRP19 transforms into a sensor of RPA-ssDNA after DNA damage and drives ATR activation via a ubiquitin-mediated circuitry.	Pubmed	2.748E-7	3.952E-2	1.145E-4	1.426E-3	40	340	AP2A1,AP2A2,ANXA2,CCAR2,MYH9,ZNF598,NTHL1,RAB11B,CPSF1,POLR2E,THOC6,INTS1,PTBP1,SCAMP3,RFC2,DAZAP1,TRIM28,RPA2,RPL6,RPL15,RPL18,RPLP0,FBL,RPS5,RPS8,RPS9,TUBB4B,EMG1,CHERP,TUBB,RUVBL2,PRPF19,LMAN2,EDC4,UBC,HSPA5,HSPB1,XRCC1,IMPDH2,SYMPK
Pubmed	28132843	ZNF598 and RACK1 Regulate Mammalian Ribosome-Associated Quality Control Function by Mediating Regulatory 40S Ribosomal Ubiquitylation.	Pubmed	2.872E-7	4.131E-2	1.194E-4	1.487E-3	5	5	ZNF598,RPS3,RPS10,RPS20,RACK1
Pubmed	18781797	Quantitative analysis of global ubiquitination in HeLa cells by mass spectrometry.	Pubmed	3.236E-7	4.654E-2	1.341E-4	1.670E-3	15	64	CBS,PHB,PSMA7,PSMB5,PTBP1,PHGDH,RPLP0,FBL,RPS8,RPS20,GET4,RUVBL2,UBC,UQCRC1,HSPB1
Pubmed	26841866	Recruitment of the Mammalian Histone-modifying EMSY Complex to Target Genes Is Regulated by ZNF131.	Pubmed	3.331E-7	4.790E-2	1.377E-4	1.714E-3	20	110	BAHCC1,NTMT1,CBX4,NFE2L1,NRGN,BRMS1,MRM2,KDM4A,SAP30L,E4F1,FBXO31,ZBTB3,MRPL28,NHP2,PWWP2B,ZNF335,TNRC18,SIN3B,ZBTB45,HSPB1
Pubmed	7772601	Cloning, sequencing and expression of the L5, L21, L27a, L28, S5, S9, S10 and S29 human ribosomal protein mRNAs.	Pubmed	3.405E-7	4.898E-2	1.403E-4	1.748E-3	6	8	RPL27A,RPL28,RPS5,RPS9,RPS10,RPS29
Pubmed	11044609	Large-scale screen for genes controlling mammalian embryogenesis, using high-throughput gene expression analysis in mouse embryos.	Pubmed	3.488E-7	5.016E-2	1.433E-4	1.785E-3	23	141	ANXA2,APOE,CCND1,IER3,NOS3,NOTCH1,CSRP2,RBP1,RFX2,NR2F6,SLC2A1,GAA,GJA4,TAGLN,UROD,VASP,HSPB1,VIM,WNT7A,WNT7B,ID1,ID3,RPSA
Pubmed	24583282	A systems wide mass spectrometric based linear motif screen to identify dominant in-vivo interacting proteins for the ubiquitin ligase MDM2.	Pubmed	3.629E-7	5.220E-2	1.487E-4	1.852E-3	12	41	PSMA7,PSMC3,TRIM28,RPL6,RPS3,RPS20,RPS23,RPS27A,TUBB,RUVBL2,MYDGF,TPT1
Pubmed	20634891	Maternal genes and facial clefts in offspring: a comprehensive search for genetic associations in two population-based cleft studies from Scandinavia.	Pubmed	3.704E-7	5.328E-2	1.514E-4	1.885E-3	39	331	FZD1,FZD8,MMP14,APOE,MT1A,AIP,OGG1,CBS,CRELD1,NRXN2,BAMBI,CTNNB1,NECTIN1,NQO1,DLX6,RARG,DVL1,RET,EGR3,SPRY2,EVC,RXRG,SALL2,FGFR1,SIX3,SLC19A1,FSCN1,FZD2,GAD1,GART,ALDH1L1,STAT3,GSTP1,TIMP2,WNT7B,XRCC1,JAG2,LCAT,LIMK1
Pubmed	22365833	Dynamic protein-protein interaction wiring of the human spliceosome.	Pubmed	3.824E-7	5.500E-2	1.558E-4	1.940E-3	28	197	CCDC12,CCAR2,LSM2,SRSF9,SNU13,PCBP1,LSM4,PPP1R8,EIF4A3,PTBP1,SF3B4,RACK1,PPIE,DDX41,CHERP,PUF60,PPIL1,SNRNP70,SNRPA,SNRPD2,LSM7,SNRPG,PRPF19,U2AF2,HSPB1,TOE1,JUP,SF3A2
Pubmed	15465494	Developmental expression of the Notch signaling pathway genes during mouse preimplantation development.	Pubmed	4.100E-7	5.896E-2	1.666E-4	2.074E-3	7	12	NOTCH1,NOTCH2,NOTCH4,DLL4,DTX1,JAG2,DLL1
Pubmed	22368283	Human PIH1 associates with histone H4 to mediate the glucose-dependent enhancement of pre-rRNA synthesis.	Pubmed	4.221E-7	6.070E-2	1.710E-4	2.129E-3	9	22	HIST1H4I,HIST1H4A,HIST1H4D,HIST1H4F,HIST1H4C,HIST1H4H,TAF1C,PIH1D1,SMARCB1
Pubmed	26381412	ATDC (Ataxia Telangiectasia Group D Complementing) Promotes Radioresistance through an Interaction with the RNF8 Ubiquitin Ligase.	Pubmed	4.289E-7	6.169E-2	1.728E-4	2.152E-3	10	28	HIST1H2BC,HIST1H4F,H1FX,RPS4X,RPS10,RUVBL2,HMGA1,HSPA1A,HSPA5,VIM
Pubmed	1286669	Human liver protein map: a reference database established by microsequencing and gel comparison.	Pubmed	4.289E-7	6.169E-2	1.728E-4	2.152E-3	10	28	ACADS,MIF,ATP5F1D,BLVRB,CALR,PEBP1,EEF1B2,RPLP2,ERP29,TPT1
Pubmed	21103663	Identification of VKORC1 interaction partners by split-ubiquitin system and coimmunoprecipitation.	Pubmed	4.319E-7	6.212E-2	1.735E-4	2.161E-3	17	83	CCDC12,ATP5MC3,CD81,PCDH1,COMT,FIS1,PDIA6,TMEM120A,TMEM176A,IFITM3,SLC25A1,TMBIM4,FTL,ZCCHC24,JAGN1,GJB1,SURF4
Pubmed	27889896	Decreased Anxiety-Related Behaviour but Apparently Unperturbed NUMB Function in Ligand of NUMB Protein-X (LNX) 1/2 Double Knockout Mice.	Pubmed	4.406E-7	6.336E-2	1.765E-4	2.198E-3	19	102	PPFIA3,CDS2,BCR,LDB1,CEP170B,PFKL,CTNNB1,DDOST,C2CD2L,AGAP2,EML3,PHLDB1,KAZN,SRCIN1,NOMO1,GSTM2,TUFM,WARS,YWHAG
Pubmed	16055720	WW domains provide a platform for the assembly of multiprotein networks.	Pubmed	4.656E-7	6.696E-2	1.860E-4	2.316E-3	24	154	AP2A1,CCDC97,KHSRP,FMNL1,CAD,CPSF1,POLR2E,PTBP1,CHTF8,DAZAP1,MAP1S,SF3B4,RPLP0,CHERP,CCT7,SNRNP70,SNRPA,RCC2,TLE3,U2AF2,AMOTL1,VASP,SF3A2,SYMPK
Pubmed	28706196	Synaptic GAP and GEF Complexes Cluster Proteins Essential for GTP Signaling.	Pubmed	4.899E-7	7.045E-2	1.952E-4	2.430E-3	33	259	GPRIN1,AP2A1,AP2A2,BEGAIN,PITPNM2,GIT1,ANXA2,ARF3,ARF5,SYNGAP1,CAMK2B,PCDH1,CEP170B,NUMBL,MINK1,PITPNM1,SOGA1,NCAN,LZTS3,DBN1,KBTBD11,DLG4,BAIAP2,AGAP2,DLGAP4,ARPC1A,DDN,NCDN,GNA11,SRCIN1,GSN,YWHAG,SHANK3
Pubmed	18976975	Genome-scale RNAi screen for host factors required for HIV replication.	Pubmed	5.022E-7	7.223E-2	1.995E-4	2.485E-3	41	361	ACACB,GRK2,OSBPL7,AKT1,KIF17,CHST1,ATOX1,RTL5,NDUFA6,BCR,NDUFS6,ANAPC2,UBQLN2,DDX49,POLR2K,POLR2L,UBALD2,THOC6,LRRC14,NDUFS7,PSMD4,PTH1R,PCYT2,DVL1,TBC1D10A,ETV3,KLF2,MED28,LSM14B,PERP,CYP46A1,USP20,NBEAL2,TMED1,GRINA,SEC61G,TPT1,MED11,UQCRC1,BAG6,UBE2Z
Pubmed	20301769	Diamond-Blackfan Anemia	Pubmed	5.105E-7	7.342E-2	2.020E-4	2.516E-3	8	17	RPL11,RPL15,RPL31,RPL35A,RPS10,RPS26,RPS28,RPS29
Pubmed	28705898	Cellular heterogeneity in the ureteric progenitor niche and distinct profiles of branching morphogenesis in organ development.	Pubmed	5.113E-7	7.353E-2	2.020E-4	2.516E-3	21	123	MDK,AK1,FXYD6,CCND1,NNAT,PSMC3IP,S100A16,CXCL14,RBP1,RET,RPS3,FBLN1,FBLN2,PPP1R1B,P3H3,NSG1,STRA6,CHADL,MFSD2A,IGFBP4,SPRY4
Pubmed	15951569	Time-resolved mass spectrometry of tyrosine phosphorylation sites in the epidermal growth factor receptor signaling network reveals dynamic modules.	Pubmed	5.238E-7	7.533E-2	2.064E-4	2.570E-3	16	75	GIT1,ANXA2,PIK3R2,PLEC,RIN1,CAVIN1,EPHA2,TNK2,ENO1,ENO2,EPHB4,SHB,RBCK1,STAT3,ITGB4,JUP
Pubmed	24623722	Systematic identification of pathological lamin A interactors.	Pubmed	5.866E-7	8.437E-2	2.305E-4	2.871E-3	39	337	C1QTNF1,CHST1,CDS2,FXYD6,BYSL,TMEM86A,CD81,PIK3R2,CXCL14,LRP10,CYB561,MARVELD1,SLC38A7,TMEM222,TMEM107,SLC2A5,LIMS2,USE1,JAGN1,UNC45A,USP20,STX4,STARD3,TAP1,CYB561D2,LMNB2,THBD,MFSD5,SLC35A4,TMEM201,SLC13A3,TMEM199,GPR108,DUS3L,AGTRAP,LAMB1,NIPAL3,ORMDL3,LMNA
Pubmed	26618355	The QTL within the H2 Complex Involved in the Control of Tuberculosis Infection in Mice Is the Classical Class II H2-Ab1 Gene.	Pubmed	6.260E-7	9.004E-2	2.453E-4	3.055E-3	10	29	RAB11B,PSMB8,DAXX,RING1,VPS52,PFDN6,TAP1,TAP2,TAPBP,KANK3
Pubmed	18635608	Tissue-specific requirements of beta-catenin in external genitalia development.	Pubmed	6.891E-7	9.911E-2	2.693E-4	3.354E-3	11	36	FZD1,FZD8,CCND1,CTNNB1,DVL1,FZD2,WNT2,WNT7A,WNT7B,FZD5,LRP5
Pubmed	26885983	The C-terminal cytoplasmic tail of hedgehog receptor Patched1 is a platform for E3 ubiquitin ligase complexes.	Pubmed	7.345E-7	1.056E-1	2.863E-4	3.565E-3	17	86	GRK2,MYL6,PHB,QPCTL,PSMA7,PSMC3,PSMD3,RAN,TRIM28,FBL,LSM14B,PRPF19,ELOB,PRMT1,VIM,WARS,IMPDH2
Pubmed	22159717	The matrisome: in silico definition and in vivo characterization by proteomics of normal and tumor extracellular matrices.	Pubmed	7.515E-7	1.081E-1	2.921E-4	3.638E-3	24	158	MFGE8,LTBP4,ANXA2,MATN4,SERPINH1,NTN1,PLOD1,COL1A2,COL6A2,CSPG4,ECM1,EGFL7,FBLN1,FBLN2,TINAGL1,TGFBI,TGM2,PLXNB2,HSPG2,VWF,VWA1,LAMB1,LAMB2,LAMB3
Pubmed	25659154	ABCE1 is a highly conserved RNA silencing suppressor.	Pubmed	7.866E-7	1.131E-1	3.041E-4	3.788E-3	28	204	MFGE8,GADD45GIP1,CBR3,PEBP1,PFKL,EXOSC4,RPL36,CSTB,EIF4A3,PSMD4,PTPRF,DCXR,RPL35A,FBL,RPS12,RPS29,HAX1,SDHB,ISYNA1,SURF4,RRP12,GNA11,LMNB2,LTO1,VIM,HSPE1,JUP,LMNA
Pubmed	26777405	ATPase-Modulated Stress Granules Contain a Diverse Proteome and Substructure.	Pubmed	7.867E-7	1.131E-1	3.041E-4	3.788E-3	37	315	H2AFV,MARS,NTMT1,PDLIM4,EIF3B,EIF3F,EIF3I,BANF1,H1FX,RCC1,TNPO2,KANK2,SEC24C,DYNLL2,UPF1,ARPC1B,NOSIP,DAZAP1,RNH1,FBL,EIF3L,FSCN1,LSM14B,NUDC,AGO2,RCC2,EIF3K,CARHSP1,HMGN1,HMGA1,EDC4,TUFM,PRMT1,VASP,EIF4H,USP5,LMNA
Pubmed	22810585	Viral immune modulators perturb the human molecular network by common and unique strategies.	Pubmed	8.065E-7	1.160E-1	3.110E-4	3.873E-3	20	116	HIST1H4A,MIF,SLC25A5,LEMD2,SLC25A3,PIK3R2,DYNLL2,ACOT8,ENO1,RPS3,RPS16,TUBB4B,TUBB,H2AFJ,USP19,CDC37,FKBP8,HSPA5,HSPE1,LGALS3BP
Pubmed	18676680	Pathway-based evaluation of 380 candidate genes and lung cancer susceptibility suggests the importance of the cell cycle pathway.	Pubmed	8.124E-7	1.168E-1	3.124E-4	3.891E-3	42	381	AKT1,ALAD,ALDH2,APOE,BAX,CCND1,BCR,NINJ1,NOS3,OGG1,CBR1,CBR3,CBS,CCND3,CD81,PHB,PIM1,COMT,POLD1,MPDU1,CTNNB1,NQO1,HSPB8,RET,NUBP2,EFNB3,RXRA,HIF1AN,SLC2A1,SLC19A1,SOD1,ALDH1L1,STK11,TNFRSF1A,HTR1B,XRCC1,IRF3,PAK6,JAK3,AIMP2,LCAT,LRP5
Pubmed	12429849	Functional proteomic analysis of human nucleolus.	Pubmed	8.167E-7	1.175E-1	3.132E-4	3.901E-3	19	106	SNU13,RRP9,DDX54,NLE1,NOC4L,NOP53,GRWD1,MRTO4,MYBBP1A,NHP2,TBL3,PDCD11,RCC2,RRP12,PRPF19,BOP1,VIM,NOL6,LMNA
Pubmed	11591653	Protein-protein interaction panel using mouse full-length cDNAs.	Pubmed	8.427E-7	1.212E-1	3.223E-4	4.014E-3	23	148	KCTD13,ALAD,SSNA1,CLDN11,PCBP1,TSEN34,HSPB8,PDCD6,FAU,PFDN6,SSSCA1,CCT7,MCRIP2,MED28,FTH1,FTL,LSM7,TCF3,TSPAN4,FKBP10,ID1,ID3,PYCR3
Pubmed	19739253	Lack of aspartoacylase activity disrupts survival and differentiation of neural progenitors and oligodendrocytes in a mouse model of Canavan disease.	Pubmed	8.507E-7	1.223E-1	3.245E-4	4.041E-3	7	13	CDKN1A,CNP,CSPG4,OLIG2,GFAP,GSTP1,VIM
Pubmed	15064750	EBP1 is a nucleolar growth-regulating protein that is part of pre-ribosomal ribonucleoprotein complexes.	Pubmed	8.795E-7	1.265E-1	3.346E-4	4.167E-3	8	18	RPL8,RPL11,RPL15,RPL18,RPL27,RPL28,RPLP0,RPLP2
Pubmed	23182705	Proteomic investigation of the interactome of FMNL1 in hematopoietic cells unveils a role in calcium-dependent membrane plasticity.	Pubmed	8.880E-7	1.277E-1	3.370E-4	4.197E-3	13	52	FMNL1,PLEC,KCTD10,CWF19L1,RPL11,FLII,SIPA1,SIPA1L3,TAP2,TUFM,HSPA1B,HSPA5,ZNF787
Pubmed	27559042	Glycoproteomics Reveals Decorin Peptides With Anti-Myostatin Activity in Human Atrial Fibrillation.	Pubmed	9.317E-7	1.340E-1	3.511E-4	4.372E-3	18	97	MFGE8,LTBP4,ANXA2,APOE,COL1A2,COL6A2,PSAP,ELN,FBLN2,TINAGL1,GPC1,TGFBI,TNXB,HSPG2,LAMB1,LAMB2,LGALS3BP,BCAM
Pubmed	22360420	Proteomic analysis identifies dysfunction in cellular transport, energy, and protein metabolism in different brain regions of atypical frontotemporal lobar degeneration.	Pubmed	9.317E-7	1.340E-1	3.511E-4	4.372E-3	18	97	AP2A1,AP2A2,ARF5,CBR1,CBR3,PHGDH,RAN,ENO2,HSPA12B,TUBB4B,TUBB,SPTB,GFAP,NCDN,IGSF8,TUBB2A,HSPA1A,HSPB1
Pubmed	19170196	Polymorphisms in innate immunity genes and lung cancer risk in Xuanwei, China.	Pubmed	9.325E-7	1.341E-1	3.511E-4	4.372E-3	42	383	AKT1,ALAD,ALDH2,APOE,BAX,CCND1,BCR,NINJ1,NOS3,OGG1,CBR1,CBR3,CBS,CCND3,CD81,PHB,PIM1,COMT,POLD1,MPDU1,CTNNB1,NQO1,HSPB8,RET,NUBP2,EFNB3,RXRA,HIF1AN,SLC2A1,SLC19A1,SOD1,ALDH1L1,STK11,TNFRSF1A,HTR1B,XRCC1,IRF3,PAK6,JAK3,AIMP2,LCAT,LRP5
Pubmed	19034380	Alterations in oligodendrocyte proteins, calcium homeostasis and new potential markers in schizophrenia anterior temporal lobe are revealed by shotgun proteome analysis.	Pubmed	9.375E-7	1.348E-1	3.520E-4	4.384E-3	11	37	NDUFS6,PEBP1,PHB,SLC9A3R1,CNP,RNH1,RPS10,TUBB,GFAP,HAPLN2,YWHAG
Pubmed	16245338	Notch1 signals through Jagged2 to regulate apoptosis in the apical ectodermal ridge of the developing limb bud.	Pubmed	9.792E-7	1.408E-1	3.667E-4	4.567E-3	6	9	NOTCH1,NOTCH2,NOTCH4,DLL4,JAG2,DLL1
Pubmed	10679242	Growth suppression of Escherichia coli by induction of expression of mammalian genes with transmembrane or ATPase domains.	Pubmed	1.015E-6	1.460E-1	3.793E-4	4.723E-3	9	24	EDF1,NKAIN4,BSCL2,RNF187,TMEM205,CX3CL1,TRABD,VSTM2B,ITM2C
Pubmed	20098747	Expanding the substantial interactome of NEMO using protein microarrays.	Pubmed	1.270E-6	1.826E-1	4.731E-4	5.892E-3	19	109	MLLT6,AKT1,NTMT1,GADD45GIP1,TRIM41,PLEKHJ1,FRMD8,RET,RPL41,RPS12,FLT4,NHP2,RBCK1,GADD45G,PIM2,TPT1,TYRO3,HPCAL1,JAK3
Pubmed	24654937	Identification of new mechanisms of cellular response to chemotherapy by tracking changes in post-translational modifications by ubiquitin and ubiquitin-like proteins.	Pubmed	1.415E-6	2.035E-1	5.258E-4	6.548E-3	13	54	EIF3F,NDUFS6,CBS,PHGDH,RANGAP1,ARPC1B,RPLP2,PCID2,PRPF19,TST,UBC,HSPA5,HSPB1
Pubmed	15537664	Urogenital and caudal dysgenesis in adrenocortical dysplasia (acd) mice is caused by a splicing mutation in a novel telomeric regulator.	Pubmed	1.426E-6	2.050E-1	5.284E-4	6.580E-3	12	46	PLEKHG4,PSMB10,PARD6A,ENKD1,CENPT,SLC12A4,TPPP3,EDC4,PLA2G15,HSF4,LCAT,DLL1
Pubmed	16273093	A quantitative protein interaction network for the ErbB receptors using protein microarrays.	Pubmed	1.434E-6	2.062E-1	5.301E-4	6.601E-3	17	90	MATK,NUMBL,PIK3R2,MAPK8IP1,SH2B1,RIN1,SH2B3,FES,FGFR1,SH3BP2,DOK4,STAT3,TNS2,TLN1,MAPK8IP2,VAV2,JAK3
Pubmed	19625176	PTEN identified as important risk factor of chronic obstructive pulmonary disease.	Pubmed	1.444E-6	2.077E-1	5.326E-4	6.633E-3	41	376	AKT1,ALAD,ALDH2,APOE,BAX,CCND1,BCR,NINJ1,NOS3,OGG1,CBR1,CBR3,CBS,CCND3,CD81,PHB,PIM1,COMT,POLD1,MPDU1,CTNNB1,NQO1,HSPB8,RET,NUBP2,RXRA,HIF1AN,SLC2A1,SLC19A1,SOD1,ALDH1L1,STK11,TNFRSF1A,HTR1B,XRCC1,IRF3,PAK6,JAK3,AIMP2,LCAT,LRP5
Pubmed	24725412	Ribosomal protein s15 phosphorylation mediates LRRK2 neurodegeneration in Parkinson's disease.	Pubmed	1.454E-6	2.091E-1	5.348E-4	6.660E-3	8	19	SLC25A5,RPL10A,RPS2,RPS3,RPS15,RPS16,RPS20,RPS23
Pubmed	29459677	A CRISPR-based screen for Hedgehog signaling provides insights into ciliary function and ciliopathies.	Pubmed	1.485E-6	2.135E-1	5.447E-4	6.784E-3	31	247	GIT1,ANXA2,MYH9,SQSTM1,CAD,HIP1R,PLEC,IPO13,PHGDH,RFC2,TRIM28,RPS27A,TUBA1B,TUBB4B,FLII,POLDIP3,SHB,TUBB,SNRNP70,SARM1,GCN1,TUBB2A,UBC,HSPA5,HSPB1,HSPE1,TUBB2B,JUP,BAG6,LAMB1,LYZ
Pubmed	19405953	Proteome analysis of schizophrenia patients Wernicke's area reveals an energy metabolism dysregulation.	Pubmed	1.518E-6	2.183E-1	5.554E-4	6.917E-3	9	25	PEBP1,CKB,SLC25A3,BRMS1,QDPR,ENO2,TUBA1B,TUBB,GFAP
Pubmed	17314511	Large-scale identification of c-MYC-associated proteins using a combined TAP/MudPIT approach.	Pubmed	1.558E-6	2.240E-1	5.686E-4	7.081E-3	28	211	MARS,TRRAP,CCAR2,EIF3I,NDUFA8,BCR,SQSTM1,PCBP1,POLD1,IPO13,PSMA7,PSMB5,PSMC3,PSMD3,PTPN14,ACOT8,IPO4,RFC2,RNH1,TRIM28,FBL,PTGES2,MYBBP1A,SLC25A1,RUVBL2,GCN1,HSPB1,LMNA
Pubmed	27576369	Regulation of monocyte cell fate by blood vessels mediated by Notch signalling.	Pubmed	1.570E-6	2.258E-1	5.687E-4	7.083E-3	5	6	NOTCH1,NOTCH2,DLL4,DLL1,LYZ
Pubmed	19217325	Lunatic and manic fringe cooperatively enhance marginal zone B cell precursor competition for delta-like 1 in splenic endothelial niches.	Pubmed	1.570E-6	2.258E-1	5.687E-4	7.083E-3	5	6	MFNG,NOTCH2,DLL4,DLL1,LFNG
Pubmed	11731257	Expression of Deltex1 during mouse embryogenesis: comparison with Notch1, 2 and 3 expression.	Pubmed	1.570E-6	2.258E-1	5.687E-4	7.083E-3	5	6	NOTCH1,NOTCH2,DTX1,ISL1,DLL1
Pubmed	14757642	Math1 controls cerebellar granule cell differentiation by regulating multiple components of the Notch signaling pathway.	Pubmed	1.629E-6	2.343E-1	5.873E-4	7.314E-3	7	14	NOTCH1,NOTCH2,NOTCH4,DLL4,TCF3,JAG2,DLL1
Pubmed	9253601	A transcript map for the 2.8-Mb region containing the multiple endocrine neoplasia type 1 locus.	Pubmed	1.629E-6	2.343E-1	5.873E-4	7.314E-3	7	14	MEN1,ARL2,SNX15,CDC42BPG,ATG2A,EHD1,TIGD3
Pubmed	18351675	Members of the WNT signaling pathways are widely expressed in mouse ovaries, oocytes, and cleavage stage embryos.	Pubmed	1.830E-6	2.631E-1	6.578E-4	8.192E-3	12	47	FZD1,FZD8,AKT1,CTNNB1,DVL1,DVL2,FZD2,WNT2,WNT7A,WNT7B,FZD5,LRP5
Pubmed	18624398	Protein interaction data set highlighted with human Ras-MAPK/PI3K signaling pathways.	Pubmed	2.178E-6	3.133E-1	7.813E-4	9.729E-3	25	179	AKT1,FHOD1,EIF3I,NDUFS8,SQSTM1,RRP9,NDUFAF3,MAP2K2,RNF10,RING1,ENO1,RPL41,RPS20,RACK1,ZNHIT1,SDHB,FTL,TTYH3,C12orf10,TPT1,COMMD1,IFI35,RPSA,VARS2,PBXIP1
Pubmed	24561123	CHIP-MYTH: a novel interactive proteomics method for the assessment of agonist-dependent interactions of the human ??-adrenergic receptor.	Pubmed	2.203E-6	3.169E-1	7.863E-4	9.792E-3	13	56	KCTD13,ADCY3,ALDOA,ARHGDIA,CD81,ADGRG1,RAN,RNF41,RACK1,STAT3,GRK6,MAPK8IP2,RGS8
Pubmed	20706999	Cytoskeletal scaffolding proteins interact with Lynch-Syndrome associated mismatch repair protein MLH1.	Pubmed	2.203E-6	3.169E-1	7.863E-4	9.792E-3	13	56	ALDOA,ANXA2,VAMP8,ABCC3,MYL6,SQSTM1,SELENBP1,CKB,TXN2,ELP6,EEF2,ZER1,GSTP1
Pubmed	20381070	Sex-specific proteome differences in the anterior cingulate cortex of schizophrenia.	Pubmed	2.215E-6	3.185E-1	7.885E-4	9.819E-3	11	40	ALDH2,ALDOA,ARHGDIA,ATP6V1B2,RNH1,ENO2,TUBA1B,FTL,TUBB2A,UCHL1,YWHAG
Pubmed	29956664	A novel source of arterial valve cells linked to bicuspid aortic valve without raphe in mice.	Pubmed	2.319E-6	3.336E-1	8.216E-4	1.023E-2	8	20	NOTCH1,NOTCH2,COL1A2,DLL4,CTNNB1,TAGLN,ISL1,JAG2
Pubmed	20308691	Identification of a hormone-regulated dynamic nuclear actin network associated with estrogen receptor alpha in human breast cancer cell nuclei.	Pubmed	2.319E-6	3.336E-1	8.216E-4	1.023E-2	8	20	MYL6,RPL7A,RPL18,RPLP0,RPS4X,RPS8,RPS9,GSN
Pubmed	15383276	A protein interaction network links GIT1, an enhancer of huntingtin aggregation, to Huntington's disease.	Pubmed	2.339E-6	3.364E-1	8.230E-4	1.025E-2	15	74	GIT1,MAGEH1,APLP1,HAP1,CHD3,RAN,ECH1,TADA3,PIAS4,NSG2,PPIL1,GADD45G,FICD,VIM,IMPDH2
Pubmed	23665443	Spatiotemporal expression of Notch receptors and ligands in developing mouse placenta.	Pubmed	2.346E-6	3.374E-1	8.230E-4	1.025E-2	6	10	NOTCH1,NOTCH2,NOTCH4,DLL4,JAG2,DLL1
Pubmed	26751069	Wuho Is a New Member in Maintaining Genome Stability through its Interaction with Flap Endonuclease 1.	Pubmed	2.346E-6	3.374E-1	8.230E-4	1.025E-2	6	10	METTL1,HIST1H4A,RPS16,FEN1,WDR4,HIST1H2BB
Pubmed	20797700	Filament-associated TSGA10 protein is expressed in professional antigen presenting cells and interacts with vimentin.	Pubmed	2.346E-6	3.374E-1	8.230E-4	1.025E-2	6	10	MYH9,MYL6,PLEC,TUBB,OBSL1,VIM
Pubmed	16512683	140 mouse brain proteins identified by Ca2+-calmodulin affinity chromatography and tandem mass spectrometry.	Pubmed	2.399E-6	3.451E-1	8.396E-4	1.046E-2	23	157	ANXA2,PPFIA3,SPTBN4,ADGRB1,NOS1,CAMK2B,PDE1B,CAMKV,PLXNA1,CNP,SV2A,PYGB,RAP1GAP,ROGDI,RPS20,SBF1,VAT1,TRIM46,NUDC,ACSBG1,SYT5,PCSK1N,YWHAG
Pubmed	24104479	A negative genetic interaction map in isogenic cancer cell lines reveals cancer cell vulnerabilities.	Pubmed	2.414E-6	3.472E-1	8.426E-4	1.049E-2	25	180	NOTCH1,FXYD1,POLD2,POLR2L,SLC36A1,FBXL6,CARS2,SAMD4B,ENO2,RPL37,ACTR5,RPS3,RPS27A,HES6,MUS81,CCT7,SNRPD2,BLOC1S1,POLM,THBD,ZBTB48,DUS3L,TRIM8,RILPL2,SF3A2
Pubmed	23718855	Identification of human protein interaction domains using an ORFeome-based yeast two-hybrid fragment library.	Pubmed	2.420E-6	3.480E-1	8.426E-4	1.049E-2	10	33	CCND1,CBS,CCND3,CDKN2D,CTNNB1,SPRY2,PARD6B,EHMT2,JUP,PYCR3
Pubmed	19135240	Regulation of PKD by the MAPK p38delta in insulin secretion and glucose homeostasis.	Pubmed	2.586E-6	3.719E-1	8.983E-4	1.119E-2	16	84	MDH2,ALDOA,ARF3,CBR1,CKB,PHGDH,RAN,EEF1B2,EEF2,PDIA6,ENO1,RPLP2,RPS3,FASN,NUDC,HSPA5
Pubmed	26764384	The LMO2 oncogene regulates DNA replication in hematopoietic cells.	Pubmed	2.727E-6	3.922E-1	9.429E-4	1.174E-2	13	57	MYL6,NDUFA8,LDB1,CACTIN,POLD1,YPEL3,EGLN2,CXXC1,FLII,HYOU1,CAPN15,ATG2A,TCF3
Pubmed	21421844	GPR124, an orphan G protein-coupled receptor, is required for CNS-specific vascularization and establishment of the blood-brain barrier.	Pubmed	2.727E-6	3.922E-1	9.429E-4	1.174E-2	13	57	CCND1,NOTCH1,NOTCH4,CCND3,DLL4,ADGRA2,CSPG4,CTNNB1,SLC2A1,TIMP2,WNT7A,WNT7B,JAG2
Pubmed	24726341	Structural determinants for the strict monomethylation activity by trypanosoma brucei protein arginine methyltransferase 7.	Pubmed	2.926E-6	4.208E-1	1.004E-3	1.251E-2	7	15	HIST1H4I,HIST1H4A,HIST1H4D,HIST1H4F,HIST1H4C,HIST1H4H,PRMT1
Pubmed	17273555	An essential role for Notch in neural crest during cardiovascular development and smooth muscle differentiation.	Pubmed	2.926E-6	4.208E-1	1.004E-3	1.251E-2	7	15	H2AFV,NOTCH1,NOTCH2,NOTCH4,DLL4,JAG2,DLL1
Pubmed	26395878	Rac1 plays an essential role in axon growth and guidance and in neuronal survival in the central and peripheral nervous systems.	Pubmed	2.926E-6	4.208E-1	1.004E-3	1.251E-2	7	15	H2AFV,CHAT,OLIG2,FOXG1,GAD1,GFAP,ISL1
Pubmed	20471030	Proteome analysis of the thalamus and cerebrospinal fluid reveals glycolysis dysfunction and potential biomarkers candidates for schizophrenia.	Pubmed	2.951E-6	4.244E-1	1.008E-3	1.256E-2	12	49	CBR1,PLEC,CRYM,PYGB,QDPR,FTL,GFAP,SYT5,GSTP1,TKT,HSPA1A,VIM
Pubmed	19161160	An association study of 45 folate-related genes in spina bifida: Involvement of cubilin (CUBN) and tRNA aspartic acid methyltransferase 1 (TRDMT1).	Pubmed	2.951E-6	4.244E-1	1.008E-3	1.256E-2	12	49	NOS1,NOS3,CBS,SARDH,FPGS,SLC19A1,GAMT,GART,ALDH1L1,ICMT,PRMT2,PRMT1
Pubmed	11031247	Secretory protein trafficking and organelle dynamics in living cells.	Pubmed	3.042E-6	4.375E-1	1.037E-3	1.291E-2	16	85	VAMP8,AP1M1,HGS,AP1S1,SEC24C,CHMP6,VPS37B,RPS27A,SEC13,FTH1,FTL,BLOC1S1,GJB1,STX4,COPE,UBC
Pubmed	19030180	Dlx1&2 and Mash1 transcription factors control striatal patterning and differentiation through parallel and overlapping pathways.	Pubmed	3.065E-6	4.409E-1	1.042E-3	1.297E-2	20	126	POU3F4,SLC32A1,FOXP4,CRYM,MAFB,DLX6,OLIG1,EGR3,OLIG2,RXRG,FOXG1,ARX,SHB,SIX3,SLIT1,GAD1,NKX6-2,ZNF503,ZIC1,ISL1
Pubmed	22493164	Systematic analysis of dimeric E3-RING interactions reveals increased combinatorial complexity in human ubiquitination networks.	Pubmed	3.071E-6	4.417E-1	1.042E-3	1.297E-2	18	105	TRIM41,PEX10,RNF166,TRAF4,RNF10,RING1,RNF41,TRIM46,ANAPC11,RNF126,RBCK1,TRIM32,TRIM35,RNF114,RNF208,MGRN1,UBC,TRIM8
Pubmed	16226712	Proteomic analysis of human O6-methylguanine-DNA methyltransferase by affinity chromatography and tandem mass spectrometry.	Pubmed	3.457E-6	4.972E-1	1.167E-3	1.454E-2	14	67	MCM2,HIST1H4A,ANXA2,CCNB1,CDKN1A,PHB,POLD1,EEF1B2,RPLP1,FBL,RPS15A,TUBB4B,USP19,VIM
Pubmed	19723774	Lack of periostin leads to suppression of Notch1 signaling and calcific aortic valve disease.	Pubmed	3.457E-6	4.972E-1	1.167E-3	1.454E-2	14	67	ALDOA,SLC25A5,RHOG,TIMM29,EIF3F,ATP6V1B2,MYL6,NME2,NOTCH1,LRP10,DBI,PIH1D1,ARFGAP2,NELFE
Pubmed	20508642	ATAC and Mediator coactivators form a stable complex and regulate a set of non-coding RNA genes.	Pubmed	3.532E-6	5.080E-1	1.190E-3	1.482E-2	18	106	TRRAP,DOCK6,EIF3B,EIF3I,MED16,TRIM28,RNF41,EIF3L,TADA3,PUF60,MED28,SNRPA,WDTC1,MED22,PRPF19,PRRC2B,HSPA5,MED25
Pubmed	19725029	Prohibitin regulates TGF-beta induced apoptosis as a downstream effector of Smad-dependent and -independent signaling.	Pubmed	3.586E-6	5.158E-1	1.200E-3	1.494E-2	8	21	SLC25A5,PHB,PLEC,COL9A2,PRKCD,DBN1,RPS4X,LMNA
Pubmed	14662765	ATP-citrate lyase deficiency in the mouse.	Pubmed	3.586E-6	5.158E-1	1.200E-3	1.494E-2	8	21	ACACB,FZD1,CHAT,FASN,SCAP,SREBF1,SREBF2,GFAP
Pubmed	8641130	Report of the sixth international workshop on human chromosome 3 mapping 1995.	Pubmed	3.586E-6	5.158E-1	1.200E-3	1.494E-2	8	21	APEH,CTNNB1,PTH1R,FBLN2,SCN5A,SEC13,GNAI2,LAMB2
Pubmed	26426291	Comprehensive interactome of Otx2 in the adult mouse neural retina.	Pubmed	3.711E-6	5.338E-1	1.238E-3	1.542E-2	12	50	PCBP1,ZNF385A,CASZ1,RPL3,RPL6,RPL8,RPS21,RPS26,RPS29,POLDIP3,U2AF2,ZNF787
Pubmed	16289162	The identification of myocilin-associated proteins in the human trabecular meshwork.	Pubmed	3.748E-6	5.391E-1	1.248E-3	1.554E-2	11	42	ALDOA,ANXA2,NOTCH2,CD81,CLIC1,COL1A2,ENO1,FTL,TKT,TNFRSF1A,VIM
Pubmed	22678362	MMS19 assembles iron-sulfur proteins required for DNA metabolism and genomic integrity.	Pubmed	3.865E-6	5.558E-1	1.284E-3	1.599E-2	22	150	AP2A1,MBD3,ARF3,FMNL1,NTHL1,CNP,POLD1,POLD2,THOC6,RANGAP1,CDIPT,TRMT2A,CIAO2B,SURF4,EIF3K,ALG1,GRK6,LTO1,CIAO3,HLA-A,PIGS,MLF2
Pubmed	15029244	Mammalian Cdh1/Fzr mediates its own degradation.	Pubmed	4.117E-6	5.921E-1	1.364E-3	1.699E-2	13	59	ANAPC2,PSMA7,PSMB5,PSMB6,PSMB8,PSMB10,PSMC3,PSMD3,PSMD4,RPS27A,FZR1,ANAPC11,UBC
Pubmed	24552588	Notch signaling regulates ovarian follicle formation and coordinates follicular growth.	Pubmed	4.493E-6	6.462E-1	1.486E-3	1.850E-2	9	28	MFNG,NOTCH1,NOTCH2,NOTCH4,DLL4,INHA,JAG2,DLL1,LFNG
Pubmed	12690205	Human chromosome 7: DNA sequence and biology.	Pubmed	4.732E-6	6.805E-1	1.561E-3	1.944E-2	51	536	TRRAP,ADCYAP1R1,FZD1,DBNL,ARF5,NUDT1,LRRC61,EIF3B,ZSCAN25,NDUFB2,GPR146,NPTX2,CAMK2B,TMED4,AP4M1,TBRG4,ATP6V1F,SNX8,UFSP1,POLD2,TES,TMEM130,CCM2,AP5Z1,ZMIZ2,NYAP1,RARRES2,ARPC1B,EPHB4,TMEM176A,CHST12,AGAP3,ARPC1A,GET4,SMARCD3,SMO,MEPCE,GIGYF1,EIF4H,WNT2,MRPS24,IMPDH1,AMZ1,IRF5,FAM20C,SLC12A9,KCNH2,AIMP2,MAFK,ZNF212,PRRT4
Pubmed	21942715	Proteomic dissection of the von Hippel-Lindau (VHL) interactome.	Pubmed	4.851E-6	6.976E-1	1.596E-3	1.988E-2	17	98	MIF,RPL10A,BSG,GRWD1,RPL7A,RPLP0,STUB1,RPS2,RPS3,RPS5,RPS15A,TUBB4B,CCT7,SNRNP70,ELOB,GRN,RPSA
Pubmed	1574589	De novo purine nucleotide biosynthesis.	Pubmed	4.948E-6	7.116E-1	1.621E-3	2.019E-2	6	11	ADSL,PFAS,GART,IMPDH1,IMPDH2,ADSSL1
Pubmed	9187150	A family of mammalian Fringe genes implicated in boundary determination and the Notch pathway.	Pubmed	4.948E-6	7.116E-1	1.621E-3	2.019E-2	6	11	MFNG,NOTCH1,NOTCH2,NOTCH4,DLL1,LFNG
Pubmed	21085121	Quantitative reactivity profiling predicts functional cysteines in proteomes.	Pubmed	4.982E-6	7.165E-1	1.626E-3	2.025E-2	7	16	HIST1H4I,HIST1H4A,HIST1H4D,HIST1H4F,HIST1H4C,HIST1H4H,PRMT1
Pubmed	14676191	Comprehensive proteomic analysis of human Par protein complexes reveals an interconnected protein network.	Pubmed	4.986E-6	7.170E-1	1.626E-3	2.025E-2	14	69	CCAR2,SQSTM1,SOGA1,PARD6A,PIH1D1,RNF41,FKBP5,MYBBP1A,PARD6B,STK11,CDC37,HSPA1A,PDRG1,LLGL1
Pubmed	26410627	The Interleukin-2-mTORc1 Kinase Axis Defines the Signaling, Differentiation, and Metabolism of T Helper 1 and Follicular B Helper T Cells.	Pubmed	5.209E-6	7.492E-1	1.692E-3	2.107E-2	27	212	AKT1,PREX1,ARL4D,RHOC,NFATC2,NOTCH2,CCNB1,CCND3,CCNF,CDKN1A,ASB6,SH2D3C,EGR3,RASGRP2,KATNB1,RXRA,TAX1BP3,AGAP2,PRR5,ANAPC11,GNA11,TCF3,TNS2,NFAM1,RASD2,JUN,LFNG
Pubmed	10330338	Human mitochondrial complex I in health and disease.	Pubmed	5.270E-6	7.580E-1	1.692E-3	2.107E-2	5	7	NDUFA1,NDUFA8,NDUFB6,NDUFB7,NDUFS7
Pubmed	10079256	Human ligands of the Notch receptor.	Pubmed	5.270E-6	7.580E-1	1.692E-3	2.107E-2	5	7	NOTCH1,NOTCH2,NOTCH4,JAG2,DLL1
Pubmed	12846471	The distribution of Notch receptors and their ligands during articular cartilage development.	Pubmed	5.270E-6	7.580E-1	1.692E-3	2.107E-2	5	7	NOTCH1,NOTCH2,NOTCH4,JAG2,DLL1
Pubmed	10508608	Nucleotide binding by TAP mediates association with peptide and release of assembled MHC class I molecules.	Pubmed	5.270E-6	7.580E-1	1.692E-3	2.107E-2	5	7	CALR,TAP1,TAP2,TAPBP,HLA-A
Pubmed	8939998	RhoGDI-3 is a new GDP dissociation inhibitor (GDI). Identification of a non-cytosolic GDI protein interacting with the small GTP-binding proteins RhoB and RhoG.	Pubmed	5.270E-6	7.580E-1	1.692E-3	2.107E-2	5	7	RHOB,RHOG,ARHGDIA,ARHGDIG,HRAS
Pubmed	11507077	Tumor susceptibility of p21(Waf1/Cip1)-deficient mice.	Pubmed	5.270E-6	7.580E-1	1.692E-3	2.107E-2	5	7	CDKN1A,CNP,OLIG1,OLIG2,GFAP
Pubmed	26687479	The variant Polycomb Repressor Complex 1 component PCGF1 interacts with a pluripotency sub-network that includes DPPA4, a regulator of embryogenesis.	Pubmed	5.282E-6	7.596E-1	1.692E-3	2.107E-2	41	396	ACACB,MCM2,MBD3,KHSRP,CCAR2,EDF1,CAD,SERPINH1,TRMT61A,SYF2,NCOR2,CAVIN1,NDUFS7,PSMD3,SAMD4B,UPF1,RING1,TUBB4B,SALL2,EMG1,CHERP,TUBB,MRPL17,NSUN5,MAP7D1,LSM14B,ZGPAT,RRP12,GCN1,TKT,PATZ1,HMGA1,ATG101,ZCCHC3,MYPOP,NT5DC2,MRPL9,TUBB2B,ITPR3,BAG6,MLF2
Pubmed	12226669	Comprehensive proteomic analysis of the human spliceosome.	Pubmed	5.314E-6	7.642E-1	1.698E-3	2.115E-2	18	109	LSM2,SRSF9,SNU13,PCBP1,CPSF1,POLR2E,POLR2I,POLR2K,POLR2L,SF3B5,PTBP1,SF3B4,SNRNP70,SNRPA,SNRPD2,SNRPG,U2AF2,SF3A2
Pubmed	20965718	Genetic variability of the fatty acid synthase pathway is not associated with prostate cancer risk in the European Prospective Investigation on Cancer (EPIC).	Pubmed	5.395E-6	7.758E-1	1.720E-3	2.142E-2	8	22	ACACB,FASN,SLC2A1,SLC2A5,SREBF1,SREBF2,SLC27A4,SLC27A1
Pubmed	29121065	Proteomic analysis reveals novel ligands and substrates for LNX1 E3 ubiquitin ligase.	Pubmed	5.498E-6	7.907E-1	1.749E-3	2.179E-2	15	79	MARS,AP2A1,PPFIA3,MYH9,SYNGAP1,TMED4,NUMBL,TRAF4,CSNK1D,TMED9,GRWD1,KIF7,MRPL4,RPL36AL,LMAN2
Pubmed	20462248	14-3-3 epsilon dynamically interacts with key components of mitogen-activated protein kinase signal module for selective modulation of the TNF-alpha-induced time course-dependent NF-kappaB activity.	Pubmed	5.764E-6	8.290E-1	1.830E-3	2.279E-2	12	52	PCBP1,PHB,QPCTL,RPL6,RPLP0,RPS3,RPS8,TUBB4B,TUBB,RUVBL2,CDC37,TUBB2B
Pubmed	15342465	Canonical WNT signaling promotes mammary placode development and is essential for initiation of mammary gland morphogenesis.	Pubmed	5.812E-6	8.359E-1	1.837E-3	2.288E-2	10	36	FZD1,FZD8,CTNNB1,DVL1,FZD2,WNT2,WNT7A,WNT7B,FZD5,LRP5
Pubmed	27141870	Expression of histone deacetylase 3 instructs alveolar type I cell differentiation by regulating a Wnt signaling niche in the lung.	Pubmed	5.812E-6	8.359E-1	1.837E-3	2.288E-2	10	36	CCND1,CCNB1,CDKN1A,TUBB4B,FOXJ1,TAGLN,VIM,WNT2,WNT7A,WNT7B
Pubmed	9244302	Intracellular cleavage of Notch leads to a heterodimeric receptor on the plasma membrane.	Pubmed	5.910E-6	8.500E-1	1.844E-3	2.296E-2	4	4	NOTCH1,NOTCH2,DTX1,DLL1
Pubmed	9629920	Two-dimensional electrophoretic analysis of mixed lineage kinase 2 N-terminal domain binding proteins.	Pubmed	5.910E-6	8.500E-1	1.844E-3	2.296E-2	4	4	MAP3K10,PHB,TUBB,TUBB2A
Pubmed	28065601	Initiation of Quality Control during Poly(A) Translation Requires Site-Specific Ribosome Ubiquitination.	Pubmed	5.910E-6	8.500E-1	1.844E-3	2.296E-2	4	4	ZNF598,RPS3,RPS10,RPS20
Pubmed	9585437	Genetic mapping of 10 microsatellites in the t complex region of mouse chromosome 17.	Pubmed	5.910E-6	8.500E-1	1.844E-3	2.296E-2	4	4	PIM1,VPS52,HLA-A,ITPR3
Pubmed	18669923	The helix-loop-helix factors Id3 and E47 are novel regulators of adiponectin.	Pubmed	5.910E-6	8.500E-1	1.844E-3	2.296E-2	4	4	APOE,SREBF1,TCF3,ID3
Pubmed	18703315	Immunohistochemical profiling of Wnt, NF-kappaB, Stat3 and Notch signaling in human epidermal tumors.	Pubmed	5.910E-6	8.500E-1	1.844E-3	2.296E-2	4	4	NOTCH1,NOTCH2,STAT3,WNT2
Pubmed	22442722	Functional consequences of necdin nucleocytoplasmic localization.	Pubmed	6.099E-6	8.772E-1	1.899E-3	2.365E-2	13	61	PPFIA3,HAP1,MIER2,DCTN1,CCM2,RPL28,TADA3,RNF114,MED22,MPND,UQCRC1,ITGB5,LAMB1
Pubmed	26471122	A non-proteolytic role for ubiquitin in deadenylation of MHC-I mRNA by the RNA-binding E3-ligase MEX-3C.	Pubmed	6.139E-6	8.829E-1	1.907E-3	2.375E-2	11	44	AP2A1,AP2A2,DHX37,CCAR2,CAD,POLRMT,GTPBP1,TRIM28,HSPA5,ZNF574,NOL6
Pubmed	20198315	Association of genetic variants with hemorrhagic stroke in Japanese individuals.	Pubmed	6.229E-6	8.958E-1	1.931E-3	2.404E-2	21	143	SPTBN4,MYH9,COX5B,NCOR2,CELSR1,CTBP1,PYGB,SBF1,SEMA3F,MON1B,TBL3,OGDHL,ALDH1L1,RUVBL2,USP20,PACS2,PANX2,IRF5,IVD,ITM2C,LRP5
Pubmed	21163940	Interactome mapping suggests new mechanistic details underlying Alzheimer's disease.	Pubmed	6.914E-6	9.944E-1	2.138E-3	2.663E-2	18	111	APOE,TIMM29,NOS3,KANK2,EGLN2,FIS1,ENO2,PI4K2A,RPS27A,TUBA1B,FARSA,FOXG1,NCDN,MLST8,CDC37,IGSF8,TYRO3,UMPS
Pubmed	23266187	The mitochondrial transporter family SLC25: identification, properties and physiopathology.	Pubmed	7.122E-6	1.000E0	2.197E-3	2.737E-2	12	53	SLC25A29,SLC25A5,SLC25A3,SLC25A10,SLC25A38,SLC25A42,SLC25A51,SLC25A22,SLC25A34,SLC25A1,UCP2,MTCH1
Pubmed	19386638	Dlx1&2 and Mash1 transcription factors control MGE and CGE patterning and differentiation through parallel and overlapping pathways.	Pubmed	7.135E-6	1.000E0	2.197E-3	2.737E-2	19	122	FOXO4,POU3F4,SLC32A1,FOXP4,CRYM,MAFB,DLX6,EGR3,OLIG2,RXRG,FOXG1,ARX,SHB,SIX3,GAD1,NKX6-2,ZNF503,ZIC1,ISL1
Pubmed	19367581	Identification of neuroglycan C and interacting partners as potential susceptibility genes for schizophrenia in a Southern Chinese population.	Pubmed	7.375E-6	1.000E0	2.266E-3	2.822E-2	13	62	BAP1,AKT1,APOE,CAMKV,PLXNB1,COMT,PRODH,GAD1,STAB1,NBEAL2,GNAI2,IMPDH2,LAMB2
Pubmed	20843780	Identification of rare DNA variants in mitochondrial disorders with improved array-based sequencing.	Pubmed	7.617E-6	1.000E0	2.326E-3	2.897E-2	10	37	ACADS,NDUFV1,NTHL1,OGG1,SNX15,POLR2E,DMPK,ENDOG,SURF1,TWNK
Pubmed	22783020	Tmem100, an ALK1 receptor signaling-dependent gene essential for arterial endothelium differentiation and vascular morphogenesis.	Pubmed	7.617E-6	1.000E0	2.326E-3	2.897E-2	10	37	AKT1,NOS3,NOTCH1,NOTCH4,DLL4,EPHB4,KLF2,GJA4,TAGLN,HSPA5
Pubmed	21853274	Shotgun proteomics and network analysis of ubiquitin-related proteins from human breast carcinoma epithelial cells.	Pubmed	7.617E-6	1.000E0	2.326E-3	2.897E-2	10	37	PHB,PSMA7,PSMB5,PHGDH,RPLP0,RPS8,RPS20,RUVBL2,UBC,HSPB1
Pubmed	24859004	The ability of inner-cell-mass cells to self-renew as embryonic stem cells is acquired following epiblast specification.	Pubmed	7.645E-6	1.000E0	2.330E-3	2.901E-2	16	91	ACVR2B,NOTCH1,NOTCH2,NOTCH4,FURIN,TFCP2L1,DLL4,KLF2,FGFR1,WNT7B,ID1,ID3,JAG2,JAK3,DLL1,LRP5
Pubmed	18922472	Distinct modes of regulation of the Uch37 deubiquitinating enzyme in the proteasome and in the Ino80 chromatin-remodeling complex.	Pubmed	7.768E-6	1.000E0	2.358E-3	2.936E-2	11	45	TFPT,INO80B,PSMA7,PSMB5,PSMB6,PSMC3,PSMD3,PSMD4,ACTR5,RUVBL2,ADRM1
Pubmed	23375831	In vivo and in vitro investigations of heterozygous nebulin knock-out mice disclose a mild skeletal muscle phenotype.	Pubmed	7.771E-6	1.000E0	2.358E-3	2.936E-2	21	145	COMTD1,RHOB,MAP3K6,CRELD1,DDIT4,PRKCD,PHGDH,PCYT2,FAM234A,RXRG,MIEF2,TAP1,CACFD1,TIMP4,TSPAN4,ARL2BP,HMGCL,LRTM2,BTG2,KCNJ12,DDX39B
Pubmed	22522171	Id proteins synchronize stemness and anchorage to the niche of neural stem cells.	Pubmed	7.918E-6	1.000E0	2.397E-3	2.986E-2	8	23	CCND1,CNP,CSPG4,OLIG1,RAP1GAP,OLIG2,ID1,ID3
Pubmed	16284245	Fezl regulates the differentiation and axon targeting of layer 5 subcortical projection neurons in cerebral cortex.	Pubmed	8.057E-6	1.000E0	2.434E-3	3.032E-2	19	123	UNC5A,DOC2B,NTN1,CRYM,SEMA4C,PTPRU,FGFR1,FOXG1,SEMA3F,SEMA6B,ZNF703,SIX3,SLIT1,GAD1,CDH22,TLE3,PLXNB2,IGFBP4,ISL1
Pubmed	18694942	Gamma-secretase activation of notch signaling regulates the balance of proximal and distal fates in progenitor cells of the developing lung.	Pubmed	8.112E-6	1.000E0	2.437E-3	3.035E-2	7	17	NOTCH1,NOTCH2,NOTCH4,DLL4,JAG2,DLL1,LFNG
Pubmed	20970343	Nucleoredoxin sustains Wnt/?-catenin signaling by retaining a pool of inactive dishevelled protein.	Pubmed	8.112E-6	1.000E0	2.437E-3	3.035E-2	7	17	CTNNB1,DVL1,DVL2,FZD2,NXN,HSPG2,ISL1
Pubmed	24163370	The HECT type ubiquitin ligase NEDL2 is degraded by anaphase-promoting complex/cyclosome (APC/C)-Cdh1, and its tight regulation maintains the metaphase to anaphase transition.	Pubmed	8.117E-6	1.000E0	2.437E-3	3.035E-2	32	281	MAZ,RSPH9,CBX4,EIF3I,NTHL1,CCNB1,RRP9,CACTIN,ANAPC2,POLRMT,PSMA7,MED16,ECM1,NOSIP,RING1,MAP1S,ACTR5,FZR1,EMG1,BAIAP2,ANAPC11,NUDT16L1,MAP7D1,TRMT2A,LSM14B,DMAP1,GRN,AMOTL1,SPHK2,DUS3L,LAMB1,SF3A2
Pubmed	19343046	Association study between single-nucleotide polymorphisms in 199 drug-related genes and commonly measured quantitative traits of 752 healthy Japanese subjects.	Pubmed	8.499E-6	1.000E0	2.542E-3	3.166E-2	25	193	ABCA2,ALDH2,CHST1,ABCC3,NDUFA1,NDUFA3,NDUFA6,NDUFA8,NDUFB7,NDUFV1,NDUFS6,NDUFS8,NDUFV3,COMT,DDOST,GAMT,ALDH1L1,TAP1,TAP2,GSTM2,GSTP1,HSD17B10,UCHL1,SLCO4A1,ABCC10
Pubmed	15112104	Gene content of the 750-kb critical region for mouse embryonic ectoderm lethal tcl-w5.	Pubmed	8.520E-6	1.000E0	2.542E-3	3.166E-2	9	30	RAB11B,DAXX,RING1,RPS28,VPS52,PFDN6,TAPBP,KANK3,HLA-A
Pubmed	22118674	Activity-based chemical proteomics accelerates inhibitor development for deubiquitylating enzymes.	Pubmed	8.520E-6	1.000E0	2.542E-3	3.166E-2	9	30	CBS,PSMB5,KCTD10,RPLP0,USP20,UBC,JOSD2,UCHL1,USP5
Pubmed	28675934	Characterization of the Extracellular Matrix of Normal and Diseased Tissues Using Proteomics.	Pubmed	8.975E-6	1.000E0	2.672E-3	3.328E-2	20	135	LTBP4,ANXA2,C1QC,SERPINH1,CRELD1,COL1A2,COL6A2,CSPG4,CSTB,ELN,EGFL7,FBLN1,TINAGL1,TGFBI,TGM2,TNXB,HSPG2,VWF,LAMB1,LAMB2
Pubmed	21308776	DLK1 is a novel regulator of bone mass that mediates estrogen deficiency-induced bone loss in mice.	Pubmed	9.085E-6	1.000E0	2.700E-3	3.362E-2	19	124	ALOX5AP,APOE,BLVRB,C1QC,CDKN1A,CKB,S100A16,CXCL14,FERMT3,BSCL2,DCXR,STAB1,ATP13A2,COTL1,THBD,UCP2,ZIC1,UNC93B1,LYZ
Pubmed	7993390	P1 and cosmid clones define the organization of 280 kb of the mouse H-2 complex containing the Cps-1 and Hsp70 loci.	Pubmed	9.486E-6	1.000E0	2.784E-3	3.467E-2	6	12	ZBTB12,LSM2,EHMT2,HSPA1A,HSPA1B,BAG6
Pubmed	18387192	A pathway sensor for genome-wide screens of intracellular proteolytic cleavage.	Pubmed	9.486E-6	1.000E0	2.784E-3	3.467E-2	6	12	AKT1,BAD,FADD,TBC1D10A,PERP,HTRA3
Pubmed	15472464	Further mapping and characterization of Naq1, a quantitative trait locus responsible for maternal inferior nurturing ability in RR mice.	Pubmed	9.486E-6	1.000E0	2.784E-3	3.467E-2	6	12	MMP17,ASL,POR,HSPB1,EIF4H,CLIP2
Pubmed	17681139	The initiation and propagation of Hes7 oscillation are cooperatively regulated by Fgf and notch signaling in the somite segmentation clock.	Pubmed	9.486E-6	1.000E0	2.784E-3	3.467E-2	6	12	NOTCH1,DUSP4,FGFR1,DLL1,LFNG,SPRY4
Pubmed	21636303	A ubiquitin ligase-associated chaperone holdase maintains polypeptides in soluble states for proteasome degradation.	Pubmed	9.486E-6	1.000E0	2.784E-3	3.467E-2	6	12	AMFR,GET4,SYVN1,HLA-A,UBE2G2,BAG6
Pubmed	12421720	Dishevelled 2 is essential for cardiac outflow tract development, somite segmentation and neural tube closure.	Pubmed	9.486E-6	1.000E0	2.784E-3	3.467E-2	6	12	NOTCH1,NOTCH2,DVL1,DVL2,DLL1,LFNG
Pubmed	22675208	Foxp1/4 control epithelial cell fate during lung development and regeneration through regulation of anterior gradient 2.	Pubmed	9.888E-6	1.000E0	2.890E-3	3.599E-2	10	38	NOTCH1,NOTCH2,NOTCH4,DLL4,FOXP4,TUBB4B,FOXJ1,UCHL1,JAG2,DLL1
Pubmed	16396496	Insulin-dependent interactions of proteins with GLUT4 revealed through stable isotope labeling by amino acids in cell culture (SILAC).	Pubmed	9.888E-6	1.000E0	2.890E-3	3.599E-2	10	38	ARF3,ARF5,BSG,SERPINH1,MVP,PDIA6,MAP1S,P3H4,SDF2L1,FKBP10
Pubmed	22079093	Proteomic analysis of the 20S proteasome (PSMA3)-interacting proteins reveals a functional link between the proteasome and mRNA metabolism.	Pubmed	1.020E-5	1.000E0	2.975E-3	3.705E-2	16	93	MDH2,ALDOA,KHSRP,CALR,CKB,PSMC3,PTBP1,EEF2,ENO1,TUBA1B,PUF60,PRPF19,TUBB2A,HSPA5,WARS,USP5
Pubmed	19805454	Quantitative nanoproteomics for protein complexes (QNanoPX) related to estrogen transcriptional action.	Pubmed	1.065E-5	1.000E0	3.094E-3	3.853E-2	13	64	SLC25A5,ANXA2,MYH9,PHB,RPL36,RAN,RPL11,RPL18,RPLP0,RPS2,RPS16,GSN,JUP
Pubmed	22261194	Proteomics analysis of cardiac extracellular matrix remodeling in a porcine model of ischemia/reperfusion injury.	Pubmed	1.065E-5	1.000E0	3.094E-3	3.853E-2	13	64	COL20A1,ANXA2,COL6A2,PSAP,FBLN2,SSPO,TINAGL1,CHADL,TGFBI,TNXB,HSPG2,LAMB1,LAMB2
Pubmed	24501781	Leukodystrophy Overview	Pubmed	1.070E-5	1.000E0	3.097E-3	3.857E-2	12	55	EIF2B4,EIF2B2,PEX10,PEX16,PSAP,PEX5,RNASEH2A,PEX26,FUCA1,GFAP,MLC1,GJC2
Pubmed	12791267	Prophase destruction of Emi1 by the SCF(betaTrCP/Slimb) ubiquitin ligase activates the anaphase promoting complex to allow progression beyond prometaphase.	Pubmed	1.070E-5	1.000E0	3.097E-3	3.857E-2	12	55	CCNB1,PSMA7,PSMB5,PSMB6,PSMB8,PSMB10,PSMC3,PSMD3,PSMD4,RPS27A,FZR1,UBC
Pubmed	20012524	Human immunodeficiency virus type-1 gag and host vesicular trafficking pathways.	Pubmed	1.137E-5	1.000E0	3.277E-3	4.081E-2	8	24	AP2A1,AP2A2,AP1M1,CD81,AP2S1,GGA1,PLIN3,CD82
Pubmed	15604097	Insights into developmental mechanisms and cancers in the mammalian intestine derived from serial analysis of gene expression and study of the hepatoma-derived growth factor (HDGF).	Pubmed	1.137E-5	1.000E0	3.277E-3	4.081E-2	8	24	MDK,CALR,CD151,PTBP1,PTH1R,RBP1,TGFBI,LLGL1
Pubmed	18495661	The nuclear transcription factor RARalpha associates with neuronal RNA granules and suppresses translation.	Pubmed	1.219E-5	1.000E0	3.498E-3	4.356E-2	11	47	AP2A1,AP2A2,EIF3B,RPS3,RPS5,RPS12,RPS16,RPS26,VIM,YWHAG,RPSA
Pubmed	20301532	Charcot-Marie-Tooth Hereditary Neuropathy Overview	Pubmed	1.219E-5	1.000E0	3.498E-3	4.356E-2	11	47	MARS,HSPB8,BSCL2,SBF1,GJB1,DNAJB2,HSPB1,WARS,IGHMBP2,LMNA,MED25
Pubmed	27671872	Cerebrovascular defects in Foxc1 mutants correlate with aberrant WNT and VEGF-A pathways downstream of retinoic acid from the meninges.	Pubmed	1.272E-5	1.000E0	3.608E-3	4.493E-2	7	18	H2AFV,CSPG4,CTNNB1,SLC2A1,WNT7A,WNT7B,KCNH2
Pubmed	25691540	Disrupted Slit-Robo signalling results in membranous ventricular septum defects and bicuspid aortic valves.	Pubmed	1.272E-5	1.000E0	3.608E-3	4.493E-2	7	18	H2AFV,NOTCH1,NOTCH2,DLL4,SLIT1,ISL1,DLL1
Pubmed	16518823	Notch 2 and Notch 1/3 segregate to neuronal and glial lineages of the developing olfactory epithelium.	Pubmed	1.272E-5	1.000E0	3.608E-3	4.493E-2	7	18	NOTCH1,NOTCH2,NOTCH4,DLL4,GFAP,JAG2,DLL1
Pubmed	18093989	Developmental coronary maturation is disturbed by aberrant cardiac vascular endothelial growth factor expression and Notch signalling.	Pubmed	1.272E-5	1.000E0	3.608E-3	4.493E-2	7	18	NOTCH1,NOTCH2,NOTCH4,DLL4,EPHB4,JAG2,DLL1
Pubmed	26425749	Nuclear Gene-Encoded Leigh Syndrome Overview	Pubmed	1.272E-5	1.000E0	3.608E-3	4.493E-2	10	39	NDUFA1,NDUFA2,NDUFV1,NDUFS8,NDUFS7,PET100,SCO2,UQCRQ,NDUFA12,SURF1
Pubmed	23864651	The identification of novel proteins that interact with the GLP-1 receptor and restrain its activity.	Pubmed	1.272E-5	1.000E0	3.608E-3	4.493E-2	10	39	APLP1,MYL6,NRGN,CD81,P4HTM,ARFRP1,APH1A,IFITM3,ERP29,MFSD5
Pubmed	19453261	High-density association study of 383 candidate genes for volumetric BMD at the femoral neck and lumbar spine among older men.	Pubmed	1.301E-5	1.000E0	3.684E-3	4.588E-2	39	383	ACVR2B,FZD1,AKT1,PDLIM4,ATF4,FADD,BAX,CCND1,NFKBIA,NFKBIB,NOTCH1,NOTCH2,CDKN1A,CNTFR,COMT,CRH,CTNNB1,MAP2K2,PTH1R,DLX6,DVL1,DVL2,EGR3,ESRRA,TCIRG1,RXRA,RXRG,FGFR1,FOSB,SMO,SPARC,THRA,TNFRSF1A,WNT7A,ID1,IGFBP4,FZD5,LRP5,LTBP3
Pubmed	9858718	Distinct expression patterns of notch family receptors and ligands during development of the mammalian inner ear.	Pubmed	1.349E-5	1.000E0	3.766E-3	4.690E-2	5	8	NOTCH1,NOTCH2,NOTCH4,JAG2,DLL1
Pubmed	12047747	Interactions formed by individually expressed TAP1 and TAP2 polypeptide subunits.	Pubmed	1.349E-5	1.000E0	3.766E-3	4.690E-2	5	8	CALR,TAP1,TAP2,TAPBP,HLA-A
Pubmed	28296634	Constitutive scaffolding of multiple Wnt enhanceosome components by Legless/BCL9.	Pubmed	1.349E-5	1.000E0	3.766E-3	4.690E-2	5	8	BCL9L,LDB1,PYGO2,CTNNB1,TLE3
Pubmed	19242545	Association and mutation analyses of 16p11.2 autism candidate genes.	Pubmed	1.349E-5	1.000E0	3.766E-3	4.690E-2	5	8	MAZ,ALDOA,TAOK2,PPP4C,SEZ6L2
Pubmed	8812460	Identification of genes from a 500-kb region at 7q11.23 that is commonly deleted in Williams syndrome patients.	Pubmed	1.349E-5	1.000E0	3.766E-3	4.690E-2	5	8	RFC2,ELN,EIF4H,CLIP2,LIMK1
Pubmed	25261685	Comparative proteomic profiling reveals aberrant cell proliferation in the brain of embryonic Ts1Cje, a mouse model of Down syndrome.	Pubmed	1.349E-5	1.000E0	3.766E-3	4.690E-2	5	8	NME2,OLIG1,OLIG2,RPLP0,TKT
Pubmed	11044610	Notch/Delta expression in the developing mouse lung.	Pubmed	1.349E-5	1.000E0	3.766E-3	4.690E-2	5	8	NOTCH1,NOTCH2,JAG2,DLL1,LFNG
Pubmed	12466855	A gene expression map of human chromosome 21 orthologues in the mouse.	Pubmed	1.468E-5	1.000E0	4.093E-3	5.097E-2	21	151	PDXK,ATP5PO,NDUFV3,CBR1,CBR3,CBS,PFKL,COL6A2,CSTB,PSMD4,OLIG1,OLIG2,NHP2,SLC19A1,SOD1,WDR4,GART,HMGN1,UBE2G2,PRMT2,WRB
Pubmed	19906978	Brn3a and Nurr1 mediate a gene regulatory pathway for habenula development.	Pubmed	1.504E-5	1.000E0	4.185E-3	5.212E-2	22	163	FZD8,TMEM176B,SAMD14,NNAT,MAP3K6,ADGRG1,CHAT,NECAB2,CARTPT,SCUBE3,TESC,ISOC1,RPS5,TMEM176A,LAMC3,HOPX,SSTR4,GFAP,NXN,VAV2,LRP5,SPATA13
Pubmed	16987237	Reduced expression of neuropeptide genes in a genome-wide screen of a secretion-deficient mouse.	Pubmed	1.514E-5	1.000E0	4.204E-3	5.235E-2	13	66	KIF17,BAD,NOS1,NTS,PDYN,NRXN2,DLG4,ENO2,RPS5,FBLN1,GAD1,SSTR1,HTR1B
Pubmed	25948554	Disruption of the lamin A and matrin-3 interaction by myopathic LMNA mutations.	Pubmed	1.545E-5	1.000E0	4.282E-3	5.333E-2	16	96	HIST1H4H,SRSF9,BANF1,PHB,TRIM28,RPL6,RPL11,FBL,RPS2,MYBBP1A,NHP2,SNRPD2,PRPF19,HIST1H2BB,U2AF2,LMNA
Pubmed	12168954	Construction of expression-ready cDNA clones for KIAA genes: manual curation of 330 KIAA cDNA clones.	Pubmed	1.568E-5	1.000E0	4.338E-3	5.402E-2	27	225	BAP1,AP2A2,PREX1,PPFIA3,BAIAP3,NRXN2,ADGRA2,C2CD2L,TMCC2,RNF10,HDAC5,MEGF6,SALL2,SCAP,SLIT1,SIPA1L3,STAB1,ZCCHC14,PHLDB1,MLC1,ZC3H4,GCN1,OBSL1,TRIOBP,TLN1,SCRIB,CLIP2
Pubmed	23666531	GATA3 controls the specification of prosensory domain and neuronal survival in the mouse cochlea.	Pubmed	1.601E-5	1.000E0	4.393E-3	5.471E-2	8	25	BAX,NOTCH1,PHGDH,FGFR1,ISL1,JUN,RPSA,LFNG
Pubmed	10617616	Requirement for a kinase-specific chaperone pathway in the production of a Cdk9/cyclin T1 heterodimer responsible for P-TEFb-mediated tat stimulation of HIV-1 transcription.	Pubmed	1.601E-5	1.000E0	4.393E-3	5.471E-2	8	25	POLR2E,POLR2I,POLR2K,POLR2L,CDC37,HSPA1A,HSPA1B,HSPA5
Pubmed	20226869	Association between genetic variants in the base excision repair pathway and outcomes after hematopoietic cell transplantations.	Pubmed	1.601E-5	1.000E0	4.393E-3	5.471E-2	8	25	NTHL1,OGG1,POLD1,POLD2,RFC2,FEN1,SMUG1,XRCC1
Pubmed	11741941	A subtractive gene expression screen suggests a role of transcription factor AP-2 alpha in control of proliferation and differentiation.	Pubmed	1.601E-5	1.000E0	4.393E-3	5.471E-2	8	25	PSAP,RPL6,RPL18,RPLP0,RPS5,GRPEL1,BLCAP,TMBIM6
Pubmed	11080476	Acetylation of HIV-1 Tat by CBP/P300 increases transcription of integrated HIV-1 genome and enhances binding to core histones.	Pubmed	1.613E-5	1.000E0	4.418E-3	5.502E-2	15	86	H2AFV,HIST1H4I,HIST1H2BE,HIST1H2BC,HIST1H4A,HIST1H4D,HIST1H4F,HIST1H4C,HIST1H4H,POLR2E,POLR2I,POLR2K,POLR2L,H2AFJ,HIST1H2BB
Pubmed	14574404	The DNA sequence and analysis of human chromosome 6.	Pubmed	1.653E-5	1.000E0	4.521E-3	5.630E-2	55	621	HIST1H4I,HIST1H2BE,RSPH9,ZBTB12,CPNE5,DLK2,SYNGAP1,RPL10A,NFKBIL1,C4B,DDR1,CCND3,PBX2,CDKN1A,ABT1,CLIC1,YIPF3,POLR1C,ATF6B,GTPBP2,KLHDC3,SCUBE3,SF3B5,PSMB8,DAXX,DXO,RING1,MRPS18A,NHLRC1,FANCE,VPS52,AGPAT1,PPIL1,SAYSD1,FRS3,PERP,TTBK1,TAPBP,TBCC,GPR6,GRM4,HLA-A,TUBB2A,HSPA1A,HSPA1B,MTCH1,HTR1B,MRPL14,TUBB2B,BAG6,DDX39B,ABCC10,NELFE,KLC4,DLL1
Pubmed	11578869	Vascular expression of Notch pathway receptors and ligands is restricted to arterial vessels.	Pubmed	1.689E-5	1.000E0	4.582E-3	5.707E-2	6	13	NOTCH1,NOTCH2,NOTCH4,DLL4,JAG2,DLL1
Pubmed	8631027	Identification of genes differentially expressed in B16 murine melanoma sublines with different metastatic potentials.	Pubmed	1.689E-5	1.000E0	4.582E-3	5.707E-2	6	13	RPLP0,RPS27A,FTL,UBC,HSPA5,RPSA
Pubmed	16120479	Proteomic analysis of succinate dehydrogenase and ubiquinol-cytochrome c reductase (Complex II and III) isolated by immunoprecipitation from bovine and mouse heart mitochondria.	Pubmed	1.689E-5	1.000E0	4.582E-3	5.707E-2	6	13	UQCR10,SDHB,SDHC,UQCRQ,UQCR11,UQCRC1
Pubmed	25401743	KCTD10 is involved in the cardiovascular system and Notch signaling during early embryonic development.	Pubmed	1.689E-5	1.000E0	4.582E-3	5.707E-2	6	13	MFNG,NOTCH1,NOTCH4,DLL4,KCTD10,TNFRSF1A
Pubmed	11285280	Anaphase-promoting complex/cyclosome-dependent proteolysis of human cyclin A starts at the beginning of mitosis and is not subject to the spindle assembly checkpoint.	Pubmed	1.795E-5	1.000E0	4.862E-3	6.055E-2	13	67	CCNB1,ANAPC2,PSMA7,PSMB5,PSMB6,PSMB8,PSMB10,PSMC3,PSMD3,PSMD4,RPS27A,ANAPC11,UBC
Pubmed	17979178	A novel tandem affinity purification strategy for the efficient isolation and characterisation of native protein complexes.	Pubmed	1.862E-5	1.000E0	5.033E-3	6.268E-2	15	87	IRS2,VAMP8,BAD,MAP2K2,PTPN14,FAM53C,BAIAP2,MAST3,KIF1C,CDC37,HSPA1A,HSPA5,YWHAG,KLC4,LIMK1
Pubmed	20935630	Association analyses of 249,796 individuals reveal 18 new loci associated with body mass index.	Pubmed	1.900E-5	1.000E0	5.127E-3	6.385E-2	12	58	ADCY3,NFE2L1,KCTD15,SH2B1,QPCTL,TMEM160,RPL27A,FAIM2,ZC3H4,GTF3A,HMGA1,TUFM
Pubmed	19851296	Assessment of a polymorphism of SDK1 with hypertension in Japanese Individuals.	Pubmed	1.926E-5	1.000E0	5.165E-3	6.432E-2	20	142	SPTBN4,MYH9,COX5B,NCOR2,CELSR1,CTBP1,PYGB,SBF1,SEMA3F,MON1B,OGDHL,ALDH1L1,RUVBL2,USP20,PACS2,PANX2,IRF5,IVD,ITM2C,LRP5
Pubmed	25871848	Constraint and divergence of global gene expression in the mammalian embryo.	Pubmed	1.928E-5	1.000E0	5.165E-3	6.432E-2	7	19	RHOB,LDB1,CTBP1,INTS11,BOP1,POLM,PLA2G15
Pubmed	24596249	Molecular functions of the TLE tetramerization domain in Wnt target gene repression.	Pubmed	1.928E-5	1.000E0	5.165E-3	6.432E-2	7	19	HIST1H4I,HIST1H4A,HIST1H4D,HIST1H4F,HIST1H4C,HIST1H4H,TCF3
Pubmed	24360279	Brd4 and JMJD6-associated anti-pause enhancers in regulation of transcriptional pause release.	Pubmed	1.928E-5	1.000E0	5.165E-3	6.432E-2	7	19	HIST1H4I,HIST1H4A,HIST1H4D,HIST1H4F,HIST1H4C,HIST1H4H,HEXIM1
Pubmed	19953087	Comparison of substrate specificity of the ubiquitin ligases Nedd4 and Nedd4-2 using proteome arrays.	Pubmed	2.048E-5	1.000E0	5.474E-3	6.818E-2	25	203	GRK2,AKT1,AMPD2,CDK5R1,CACNB1,DIRAS1,TRIM41,HGS,DDX54,MINK1,PRKCD,RASL10B,DAPK3,STK40,FES,FGFR1,BAIAP2,FLT4,SIVA1,NUDT16L1,NHP2,RBCK1,TSTA3,KIFC3,KLC4
Pubmed	24816252	An atlas of genetic influences on human blood metabolites.	Pubmed	2.128E-5	1.000E0	5.678E-3	7.072E-2	24	191	ACADS,DBNL,APOE,ZSCAN25,SLC5A6,MYRF,NT5E,CBS,KYAT1,COMT,TBC1D13,PTPA,PRODH,PHGDH,SH2B3,ASPG,NUBP2,TOMM40L,FEN1,OPLAH,ISYNA1,UNC119B,TKT,IVD
Pubmed	24140708	Poly(ADP-ribose) polymerase-1 modulates Nrf2-dependent transcription.	Pubmed	2.213E-5	1.000E0	5.894E-3	7.341E-2	8	26	MAFG,PHB,NQO1,DDX39A,RPL27A,RPS8,TUBB,MAFK
Pubmed	23254330	Regulation of error-prone translesion synthesis by Spartan/C1orf124.	Pubmed	2.280E-5	1.000E0	6.050E-3	7.534E-2	12	59	ANXA2,POLD4,H1FX,CAD,PHB,POLD1,POLD2,PSMD3,PSMD4,TRIM28,TUFM,VIM
Pubmed	18022941	Protein partners in the life history of activated fibroblast growth factor receptors.	Pubmed	2.280E-5	1.000E0	6.050E-3	7.534E-2	12	59	BAX,RAB11B,PHB,TMED9,DDOST,PHGDH,TUBA1B,FGFR1,RUVBL2,LMAN2,CDC37,MTCH1
Pubmed	24769233	Proteomic analysis of cerebrospinal fluid extracellular vesicles: a comprehensive dataset.	Pubmed	2.285E-5	1.000E0	6.051E-3	7.536E-2	11	50	MFGE8,MGAT1,APOE,ATP1A3,CBR1,COL6A2,TUBB4B,FBLN2,GNAI2,TUBB2A,LFNG
Pubmed	15324660	Proteomic, functional, and domain-based analysis of in vivo 14-3-3 binding proteins involved in cytoskeletal regulation and cellular organization.	Pubmed	2.328E-5	1.000E0	6.154E-3	7.663E-2	29	256	GIT1,IRS2,CAD,NUMBL,SLC25A3,PIK3R2,EIF4A3,DFFA,PTPN14,SAMD4B,ENO1,RPS2,BAIAP2,CAMKK1,PUF60,TUBB,EML3,PRPF19,SH3BP5L,TUBB2A,UBC,PRMT1,HSPA1A,HSPA1B,HSPA5,VIM,YWHAG,DDX39B,KLC4
Pubmed	26362536	Proteomic analysis of HIV-1 Gag interacting partners using proximity-dependent biotinylation.	Pubmed	2.576E-5	1.000E0	6.772E-3	8.434E-2	10	42	ACACB,CHD3,RPL11,RPL27A,RPL28,RPL37A,RPS2,RPS3,RPS5,RPS16
Pubmed	18985028	Hepatitis C virus infection protein network.	Pubmed	2.576E-5	1.000E0	6.772E-3	8.434E-2	10	42	LTBP4,VPS52,FBLN2,FTH1,FRS3,PPP1R13L,STAT3,VIM,VWF,JUN
Pubmed	27780869	URI Regulates KAP1 Phosphorylation and Transcriptional Repression via PP2A Phosphatase in Prostate Cancer Cells.	Pubmed	2.576E-5	1.000E0	6.772E-3	8.434E-2	10	42	NOC4L,POLR2E,POLR1C,PTPA,PIH1D1,TRIM28,PFDN6,RUVBL2,PDRG1,LMNA
Pubmed	21800051	The interaction between ubiquitin C-terminal hydrolase 37 and glucose-regulated protein 78 in hepatocellular carcinoma.	Pubmed	2.615E-5	1.000E0	6.821E-3	8.495E-2	16	100	HIST1H4I,HIST1H4A,HIST1H4D,HIST1H4F,HIST1H4C,HIST1H4H,TXN2,S100A16,EEF2,FTH1,FTL,HBA2,HBB,HSPA5,HSPB1,LMNA
Pubmed	27631609	Disruption of Rest Leads to the Early Onset of Cataracts with the Aberrant Terminal Differentiation of Lens Fiber Cells.	Pubmed	2.618E-5	1.000E0	6.821E-3	8.495E-2	9	34	CCND1,NOTCH1,NOTCH2,NOTCH4,CDKN1A,CTNNB1,SIX3,JAG2,DLL1
Pubmed	21252157	Notch signaling regulates smooth muscle differentiation of epicardium-derived cells.	Pubmed	2.618E-5	1.000E0	6.821E-3	8.495E-2	9	34	NOS3,NOTCH1,NOTCH2,NOTCH4,DLL4,FBLN2,TAGLN,JAG2,DLL1
Pubmed	12234937	Characterization of novel SF3b and 17S U2 snRNP proteins, including a human Prp5p homologue and an SF3b DEAD-box protein.	Pubmed	2.618E-5	1.000E0	6.821E-3	8.495E-2	9	34	SF3B5,SF3B4,HMG20B,CHERP,PUF60,SNRPD2,SNRPG,U2AF2,SF3A2
Pubmed	18800919	Patterns of Wnt/Fzd/LRP gene expression during embryonic hematopoiesis.	Pubmed	2.618E-5	1.000E0	6.821E-3	8.495E-2	9	34	FZD1,FZD8,MAFB,FZD2,WNT2,WNT7A,WNT7B,FZD5,LRP5
Pubmed	16403219	Pim kinases phosphorylate multiple sites on Bad and promote 14-3-3 binding and dissociation from Bcl-XL.	Pubmed	2.697E-5	1.000E0	6.889E-3	8.579E-2	4	5	BAD,PIM1,PIM3,PIM2
Pubmed	16818724	Signaling across the synapse: a role for Wnt and Dishevelled in presynaptic assembly and neurotransmitter release.	Pubmed	2.697E-5	1.000E0	6.889E-3	8.579E-2	4	5	DLG4,DVL1,WNT7A,WNT7B
Pubmed	21726900	Expression patterns of Notch receptors and their ligands Jagged and Delta in human placenta.	Pubmed	2.697E-5	1.000E0	6.889E-3	8.579E-2	4	5	NOTCH2,NOTCH4,DLL4,DLL1
Pubmed	19091404	Notch-1 regulates Akt signaling pathway and the expression of cell cycle regulatory proteins cyclin D1, CDK2 and p21 in T-ALL cell lines.	Pubmed	2.697E-5	1.000E0	6.889E-3	8.579E-2	4	5	AKT1,CCND1,NOTCH1,CDKN1A
Pubmed	11346656	Manic fringe and lunatic fringe modify different sites of the Notch2 extracellular region, resulting in different signaling modulation.	Pubmed	2.697E-5	1.000E0	6.889E-3	8.579E-2	4	5	MFNG,NOTCH2,DLL1,LFNG
Pubmed	11091082	Dynamic expression of basic helix-loop-helix Olig family members: implication of Olig2 in neuron and oligodendrocyte differentiation and identification of a new member, Olig3.	Pubmed	2.697E-5	1.000E0	6.889E-3	8.579E-2	4	5	CNP,OLIG1,OLIG2,GFAP
Pubmed	18248301	Variation in HLA class I antigen-processing genes and susceptibility to human papillomavirus type 16-associated cervical cancer.	Pubmed	2.697E-5	1.000E0	6.889E-3	8.579E-2	4	5	PSMB8,TAP1,TAP2,TAPBP
Pubmed	11003705	Comparative genomic sequence analysis of the Williams syndrome region (LIMK1-RFC2) of human chromosome 7q11.23.	Pubmed	2.697E-5	1.000E0	6.889E-3	8.579E-2	4	5	RFC2,ELN,EIF4H,LIMK1
Pubmed	23675950	Intraovarian regulation of gonadotropin-dependent folliculogenesis depends on notch receptor signaling pathways not involving Delta-like ligand 4 (Dll4).	Pubmed	2.697E-5	1.000E0	6.889E-3	8.579E-2	4	5	NOTCH1,NOTCH2,NOTCH4,DLL4
Pubmed	16343492	Ethanol rapidly causes activation of JNK associated with ER stress under inhibition of ADH.	Pubmed	2.697E-5	1.000E0	6.889E-3	8.579E-2	4	5	AKT1,MAPK8IP1,HSPA5,JUN
Pubmed	29033244	iASPP Is an Antioxidative Factor and Drives Cancer Growth and Drug Resistance by Competing with Nrf2 for Keap1 Binding.	Pubmed	2.697E-5	1.000E0	6.889E-3	8.579E-2	4	5	SQSTM1,KEAP1,PPP1R13L,UBC
Pubmed	9730611	Comparative mapping of two adjacent regions of MMU19 with their human counterpart on HSA11q13.	Pubmed	2.833E-5	1.000E0	7.145E-3	8.899E-2	6	14	GRK2,NDUFV1,ROM1,FTH1,GSTP1,LTBP3
Pubmed	8088777	Genetic linkage analysis of the Ak1, Col5a1, Epb7.2, Fpgs, Grp78, Pbx3, and Notch1 genes in the region of mouse chromosome 2 homologous to human chromosome 9q.	Pubmed	2.833E-5	1.000E0	7.145E-3	8.899E-2	6	14	AK1,NOTCH1,RXRA,FPGS,GSN,HSPA5
Pubmed	7916002	Recombination in the class III region of the mouse major histocompatibility complex.	Pubmed	2.833E-5	1.000E0	7.145E-3	8.899E-2	6	14	C4B,NOTCH4,TNXB,HLA-A,HSPA1A,HSPA1B
Pubmed	22343720	Methylation of H4 lysines 5, 8 and 12 by yeast Set5 calibrates chromatin stress responses.	Pubmed	2.833E-5	1.000E0	7.145E-3	8.899E-2	6	14	HIST1H4I,HIST1H4A,HIST1H4D,HIST1H4F,HIST1H4C,HIST1H4H
Pubmed	3035717	Protein-DNA interactions in vivo upstream of a cell cycle-regulated human H4 histone gene.	Pubmed	2.833E-5	1.000E0	7.145E-3	8.899E-2	6	14	HIST1H4I,HIST1H4A,HIST1H4D,HIST1H4F,HIST1H4C,HIST1H4H
Pubmed	28739485	HSP90 is necessary for the ACK1-dependent phosphorylation of STAT1 and STAT3.	Pubmed	2.833E-5	1.000E0	7.145E-3	8.899E-2	6	14	SLC25A5,CSK,TNK2,HAX1,STAT3,CDC37
Pubmed	19417104	SMG-8 and SMG-9, two novel subunits of the SMG-1 complex, regulate remodeling of the mRNA surveillance complex during nonsense-mediated mRNA decay.	Pubmed	2.842E-5	1.000E0	7.145E-3	8.899E-2	7	20	EIF4A3,UPF1,EEF2,RPL7A,RPL11,RPS3,RPS16
Pubmed	22373579	RNF8- and RNF168-dependent degradation of KDM4A/JMJD2A triggers 53BP1 recruitment to DNA damage sites.	Pubmed	2.842E-5	1.000E0	7.145E-3	8.899E-2	7	20	HIST1H4I,HIST1H4A,HIST1H4D,HIST1H4F,HIST1H4C,HIST1H4H,KDM4A
Pubmed	26798014	Oligodendrocyte precursors migrate along vasculature in the developing nervous system.	Pubmed	2.842E-5	1.000E0	7.145E-3	8.899E-2	7	20	ADGRA2,CSPG4,OLIG1,OLIG2,WNT7A,WNT7B,ISL1
Pubmed	11118901	Dynamic expression patterns of the pudgy/spondylocostal dysostosis gene Dll3 in the developing nervous system.	Pubmed	2.912E-5	1.000E0	7.233E-3	9.008E-2	5	9	NOTCH1,NOTCH2,NOTCH4,JAG2,DLL1
Pubmed	10837027	Notch signaling is essential for vascular morphogenesis in mice.	Pubmed	2.912E-5	1.000E0	7.233E-3	9.008E-2	5	9	NOTCH1,NOTCH4,DLL4,JAG2,DLL1
Pubmed	28803732	Reck and Gpr124 Are Essential Receptor Cofactors for Wnt7a/Wnt7b-Specific Signaling in Mammalian CNS Angiogenesis and Blood-Brain Barrier Regulation.	Pubmed	2.912E-5	1.000E0	7.233E-3	9.008E-2	5	9	ADGRA2,CTNNB1,SLC2A1,WNT7A,WNT7B
Pubmed	8805302	Point mutations in the alpha 2 domain of HLA-A2.1 define a functionally relevant interaction with TAP.	Pubmed	2.912E-5	1.000E0	7.233E-3	9.008E-2	5	9	CALR,TAP1,TAP2,TAPBP,HLA-A
Pubmed	27023172	Deletion of JMJD2B in neurons leads to defective spine maturation, hyperactive behavior and memory deficits in mouse.	Pubmed	2.912E-5	1.000E0	7.233E-3	9.008E-2	5	9	RHOB,RHOG,DLG4,GAD1,GFAP
Pubmed	17605079	Notch1 expression and ligand interactions in progenitor cells of the mouse olfactory epithelium.	Pubmed	2.912E-5	1.000E0	7.233E-3	9.008E-2	5	9	MFNG,NOTCH1,DLL4,DLL1,LFNG
Pubmed	17055437	Redox regulation facilitates optimal peptide selection by MHC class I during antigen processing.	Pubmed	2.912E-5	1.000E0	7.233E-3	9.008E-2	5	9	CALR,TAP1,TAP2,TAPBP,HLA-A
Pubmed	23314748	Why do cellular proteins linked to K63-polyubiquitin chains not associate with proteasomes?	Pubmed	2.922E-5	1.000E0	7.244E-3	9.022E-2	22	170	DOCK6,PTOV1,SQSTM1,CBR1,CBR3,HGS,CHD3,R3HDM4,EPN1,P4HTM,PSMD4,PTH1R,TMEM160,SNRNP25,EFS,SEMA3F,CDH22,BRF1,TSTA3,UBC,HSPA5,USP5
Pubmed	17342744	HSP27 and HSP70 interact with CD10 in C4-2 prostate cancer cells.	Pubmed	2.932E-5	1.000E0	7.257E-3	9.038E-2	13	70	MYH9,SLC9A3R1,LAMTOR1,FAM234A,RPS10,RPS23,TM9SF1,RUVBL2,HSPA1A,HSPA1B,HSPB1,IMPDH2,LMNA
Pubmed	19501082	Analysis of early nephron patterning reveals a role for distal RV proliferation in fusion to the ureteric tip via a cap mesenchyme-derived connecting segment.	Pubmed	2.947E-5	1.000E0	7.283E-3	9.070E-2	14	80	CCND1,OXTR,CXCL14,CRH,THOC6,CBLN4,CTNNB1,RPS9,SSSCA1,RCC2,MFSD2A,VARS2,DLL1,MED25
Pubmed	21320693	Antiviral inhibition targeting the HCMV kinase pUL97 requires pUL27-dependent degradation of Tip60 acetyltransferase and cell-cycle arrest.	Pubmed	3.011E-5	1.000E0	7.364E-3	9.171E-2	8	27	TRRAP,CBR1,PSMB6,PSMD3,RAN,RUVBL2,STAT3,FKBP10
Pubmed	29967281	SP8 and SP9 coordinately promote D2-type medium spiny neuron production by activating	Pubmed	3.011E-5	1.000E0	7.364E-3	9.171E-2	8	27	ADORA2A,BAX,CHAT,SIX3,GADD45G,GPR6,ISL1,BTG2
Pubmed	20574454	Polymorphisms in the base excision repair pathway and graft-versus-host disease.	Pubmed	3.011E-5	1.000E0	7.364E-3	9.171E-2	8	27	NTHL1,OGG1,POLD1,POLD2,RFC2,FEN1,SMUG1,XRCC1
Pubmed	10613844	Perfect conserved linkage across the entire mouse chromosome 10 region homologous to human chromosome 21.	Pubmed	3.011E-5	1.000E0	7.364E-3	9.171E-2	8	27	MIF,PDXK,PFKL,COL6A2,CSTB,SLC19A1,UBE2G2,PRMT2
Pubmed	21343306	Membrane-associated ubiquitin ligase complex containing gp78 mediates sterol-accelerated degradation of 3-hydroxy-3-methylglutaryl-coenzyme A reductase.	Pubmed	3.011E-5	1.000E0	7.364E-3	9.171E-2	8	27	AMFR,SRPRB,TRIM28,HAX1,TIMM50,SYVN1,UBC,HSPA5
Pubmed	19862764	Analysis of interaction partners of H4 histone by a new proteomics approach.	Pubmed	3.011E-5	1.000E0	7.364E-3	9.171E-2	8	27	MCM2,HIST1H4I,HIST1H4A,HIST1H4D,HIST1H4F,HIST1H4C,HIST1H4H,DAXX
[truncated: 18,675 more rows]

## Sheet: GO_SHARED_DN
Category	ID	Name	Source	p-value	q-value Bonferroni	q-value FDR B&H	q-value FDR B&Y	Hit Count in Query List	Hit Count in Genome	Hit in Query List
[truncated: 14,232 more rows]

[truncated: 4 more sheets: GO_UNIQUE_SD_UP, GO_UNIQUE_SD_DN, GO_UNIQUE_RS_UP, GO_UNIQUE_RS_DN]
