# Supplementary material for: An essential role for MEF2C in the cortical response to loss of sleep in mice
Source: eLife journal article supplement (doi:10.7554/elife.58331), 2020-08-27
Supplement: supp [file elife-58331-supp-v1.zip › elife_poa_e58331_Supplementary_file_4.xlsx]

## Sheet: Intramodular Connectivity
Module	Genes	kWithin
Module_01	Adam33	45.6293
Module_01	Adcy2	66.2006
Module_01	Adk	36.3719
Module_01	Aldob	26.5916
Module_01	Anapc10	50.7241
Module_01	Ank2	18.3496
Module_01	Ankrd42	59.1192
Module_01	Arid4a	31.3894
Module_01	Arid4b	61.1652
Module_01	Armc8	42.0395
Module_01	Arntl2	32.6998
Module_01	Asap1	44.3143
Module_01	Atf6	22.444
Module_01	Atg4c	51.2288
Module_01	Atp8a1	49.8981
Module_01	Atrnl1	68.8545
Module_01	Bbof1	38.5871
Module_01	Blm	31.2594
Module_01	Brdt	39.7658
Module_01	Cacnb4	76.0734
Module_01	Cadps	60.0961
Module_01	Car10	66.0339
Module_01	Cblb	47.702
Module_01	Cc2d2a	45.1515
Module_01	Ccdc85a	34.2326
Module_01	Cdk12	48.0942
Module_01	Cep162	45.9899
Module_01	Cep192	44.123
Module_01	Chd6	18.8832
Module_01	Cnrip1	29.5841
Module_01	Cobll1	59.1976
Module_01	Csnk1g1	67.1827
Module_01	Cspp1	52.0286
Module_01	Ctnnal1	1.12132
Module_01	Cyyr1	39.8529
Module_01	Dgkh	36.0551
Module_01	Dlc1	46.8268
Module_01	Efcab2	20.1755
Module_01	Efna5	52.7295
Module_01	Ehbp1	53.9971
Module_01	Elavl2	48.0247
Module_01	Emcn	34.094
Module_01	Enpp2	8.31093
Module_01	Epb41l3	54.6668
Module_01	Erc1	48.9543
Module_01	Erp44	58.0691
Module_01	Esyt2	29.47
Module_01	Eya4	70.9797
Module_01	Fam185a	28.4545
Module_01	Fam188a	17.3141
Module_01	Fam19a1	50.1273
Module_01	Fam19a2	81.8456
Module_01	Fam69a	45.9174
Module_01	Fbxl17	37.4141
Module_01	Fhod3	59.2589
Module_01	Figf	28.6836
Module_01	Fnbp4	9.30008
Module_01	Frem1	25.2745
Module_01	Frmd5	26.7804
Module_01	Gkap1	8.5811
Module_01	Glmn	65.508
Module_01	Gpr45	20.5903
Module_01	Hace1	68.3695
Module_01	Herc1	45.5885
Module_01	Herc3	17.2858
Module_01	Hmcn1	35.6424
Module_01	Hs2st1	39.1248
Module_01	Ica1	71.7048
Module_01	Igfbp7	37.0815
Module_01	Jmjd1c	57.1528
Module_01	Kcnc2	71.8838
Module_01	Kcnh5	78.4827
Module_01	Kcnma1	27.8478
Module_01	Kif16b	33.0676
Module_01	Kif21a	15.9048
Module_01	Klf12	50.816
Module_01	Klhl32	70.7776
Module_01	Lama4	36.4255
Module_01	Larp1b	71.0554
Module_01	Lclat1	19.4352
Module_01	Lcor	35.1765
Module_01	Lims1	46.3616
Module_01	Lmbr1	20.1198
Module_01	Lrrc8b	8.37011
Module_01	Lrrc8c	29.1143
Module_01	Luc7l2	57.8342
Module_01	Lypd6	62.3882
Module_01	Magi3	74.0573
Module_01	Man1a2	39.3634
Module_01	Man2a1	19.7055
Module_01	Map4k3	56.6795
Module_01	Map4k5	42.673
Module_01	Mapk10	59.9807
Module_01	Mast4	48.9612
Module_01	Mbtd1	58.1488
Module_01	Mcf2	26.2943
Module_01	Mcmdc2	30.0061
Module_01	Memo1	42.31
Module_01	Mllt10	53.7276
Module_01	Mnat1	50.1301
Module_01	Msrb3	54.0169
Module_01	Myo5c	3.54059
Module_01	Nefh	7.30971
Module_01	Nek1	58.9637
Module_01	Nfat5	59.5701
Module_01	Nfib	44.8958
Module_01	Ninj2	23.0013
Module_01	Nktr	50.9421
Module_01	Npas3	55.1369
Module_01	Nr6a1	64.9956
Module_01	Nrd1	17.7991
Module_01	Nudt6	9.7541
Module_01	Numb	40.4256
Module_01	Olfr1564	42.7736
Module_01	Olfr78	35.8349
Module_01	Osbpl1a	24.2273
Module_01	Oxr1	69.6846
Module_01	Pbdc1	55.2433
Module_01	Pcgf5	60.7509
Module_01	Pde4d	65.3322
Module_01	Pde7a	69.8193
Module_01	Pdzrn3	35.912
Module_01	Phtf2	66.5432
Module_01	Pias1	48.474
Module_01	Pign	18.7842
Module_01	Pik3ca	39.9938
Module_01	Pip4k2a	11.3018
Module_01	Pip5k1b	34.458
Module_01	Platr25	59.2075
Module_01	Plcb4	67.2326
Module_01	Pparg	58.0093
Module_01	Ppp3ca	24.8677
Module_01	Ptpn21	10.202
Module_01	Ptprk	78.9678
Module_01	Ranbp9	48.5889
Module_01	Rapgef4	20.0668
Module_01	Raph1	70.8787
Module_01	Rasgrf2	42.3781
Module_01	Rasgrp3	21.611
Module_01	Rassf3	38.74
Module_01	Rassf9	49.2884
Module_01	Rbks	50.3884
Module_01	Rbm6	62.0709
Module_01	Rbpj	44.1909
Module_01	Rcan2	23.2118
Module_01	Rgs22	19.4336
Module_01	RP23-188K3.6	65.7019
Module_01	RP23-330D3.5	54.8637
Module_01	RP23-360A2.3	53.6374
Module_01	RP23-388P16.4	12.6616
Module_01	RP23-431F3.1	50.9401
Module_01	Rpe65	25.7011
Module_01	Rras2	56.8215
Module_01	Rspo2	53.2041
Module_01	Rwdd3	21.3173
Module_01	Satb2	57.3129
Module_01	Sestd1	64.929
Module_01	Sidt1	33.4503
Module_01	Slc25a40	21.6275
Module_01	Slc26a8	21.0997
Module_01	Slc2a13	77.2922
Module_01	Slc41a2	14.7081
Module_01	Slc8a1	59.2174
Module_01	Slc9a3	4.42635
Module_01	Slco1a4	28.8436
Module_01	Snapc3	26.0011
Module_01	Sorcs1	21.5788
Module_01	Sox5	56.4868
Module_01	Sox6	41.1249
Module_01	Spag9	15.0029
Module_01	Spats2l	73.7724
Module_01	Srpk2	42.7957
Module_01	Stag1	67.1309
Module_01	Stk3	73.3092
Module_01	Strbp	68.2406
Module_01	Sun1	39.5382
Module_01	Syt16	55.9389
Module_01	Taf1	59.1293
Module_01	Tbl1xr1	53.5077
Module_01	Tgfbr1	31.2571
Module_01	Thrb	54.3255
Module_01	Thumpd3	16.4478
Module_01	Tmc1	18.5649
Module_01	Tmcc1	47.0965
Module_01	Tmem135	64.1193
Module_01	Tmem245	75.5174
Module_01	Tom1l1	24.6641
Module_01	Ttc39b	16.5511
Module_01	Ube2e2	52.0034
Module_01	Ubn2	44.2852
Module_01	Upf2	27.1275
Module_01	Uri1	64.4238
Module_01	Vps13a	59.1137
Module_01	Wasf1	20.5823
Module_01	Xrn1	60.7732
Module_01	Ylpm1	55.5819
Module_01	Zc3h13	71.5549
Module_01	Zcchc7	53.0669
Module_01	Zfp182	42.9705
Module_01	Zfp53	44.6221
Module_01	Zfp697	39.9948
Module_02	9930111J21Rik2	37.3194
Module_02	Abca8b	42.848
Module_02	AC103635.1	60.4664
Module_02	AC116718.1	37.9869
Module_02	AC129337.1	50.5686
Module_02	AC157555.1	37.4669
Module_02	Adam18	58.944
Module_02	Adam23	65.0456
Module_02	Adgrl3	58.4245
Module_02	Agk	45.154
Module_02	Alg6	46.1332
Module_02	Ankrd12	43.8474
Module_02	Ano3	38.2878
Module_02	Arhgap32	7.02628
Module_02	Armc4	10.9074
Module_02	Bank1	22.5495
Module_02	Bmper	3.49254
Module_02	C7	59.6032
Module_02	Casp12	28.187
Module_02	Cav2	21.5911
Module_02	Ccar1	49.806
Module_02	Ccdc122	47.3699
Module_02	Ccdc148	28.4876
Module_02	Ccdc34	43.8389
Module_02	Cd180	38.9901
Module_02	Cdh8	38.5845
Module_02	Cdh9	60.1961
Module_02	Cetn4	49.4241
Module_02	Cml3	6.78116
Module_02	Cntn3	41.7711
Module_02	Cntnap5b	54.5254
Module_02	Csmd3	67.4481
Module_02	Cttnbp2	38.3547
Module_02	D3Ertd751e	66.4525
Module_02	Ddx4	13.3784
Module_02	Diaph2	65.5239
Module_02	Dnah7c	34.5783
Module_02	Dok6	53.1517
Module_02	Dpyd	53.481
Module_02	Efhc2	34.4268
Module_02	Etohi1	34.4469
Module_02	Fam120c	52.5556
Module_02	Fam198b	48.4226
Module_02	Fbxl4	10.1995
Module_02	Gab3	48.6966
Module_02	Gca	47.7823
Module_02	Gpc6	1.27654
Module_02	Gphn	56.771
Module_02	Gpr137c	52.8102
Module_02	Gpr158	65.0396
Module_02	Grid2	61.0674
Module_02	Grm3	65.3872
Module_02	Grm5	46.4429
Module_02	Gucy1a2	47.9978
Module_02	Hecw2	56.3978
Module_02	Hnrnpr	48.196
Module_02	Htatsf1	39.0538
Module_02	Itgb3bp	19.9756
Module_02	Kcnq5	60.8072
Module_02	Lactb	21.7992
Module_02	Lin7a	67.7571
Module_02	Lrguk	3.55048
Module_02	Lrrcc1	59.9115
Module_02	Lrriq1	47.1787
Module_02	Lsamp	43.2048
Module_02	Ly86	62.6974
Module_02	Malsu1	27.2844
Module_02	March1	57.6839
Module_02	Mef2a	34.2202
Module_02	Mettl24	1.80853
Module_02	Mipol1	38.3442
Module_02	Mlip	59.492
Module_02	Neto1	45.6905
Module_02	Nkain2	57.667
Module_02	Nlgn1	45.3177
Module_02	Nova1	39.2953
Module_02	Nsrp1	50.2816
Module_02	Olfm3	43.4369
Module_02	P2ry12	51.0709
Module_02	Pate2	49.9575
Module_02	Pcdh11x	47.7061
Module_02	Pde4b	47.6662
Module_02	Pla2g4e	26.975
Module_02	Pnn	51.0662
Module_02	Poln	31.4678
Module_02	Polr3g	44.4291
Module_02	Pou6f2	47.4394
Module_02	Ppfia2	47.0011
Module_02	Ppig	43.9787
Module_02	Ptchd1	40.4437
Module_02	Ptchd4	48.2806
Module_02	Ptger3	61.9478
Module_02	Ptprr	44.3335
Module_02	Rab11fip2	62.5487
Module_02	Rad50	35.6514
Module_02	Rgs17	32.1734
Module_02	Rit2	61.3861
Module_02	Rmdn2	17.2545
Module_02	Rnf17	36.0102
Module_02	RP23-114B10.4	36.5542
Module_02	RP23-145N4.1	43.1589
Module_02	RP23-14F5.7	42.4223
Module_02	RP23-173N16.6	40.1081
Module_02	RP23-17P12.8	1.72159
Module_02	RP23-206D14.1	49.782
Module_02	RP23-216C6.2	58.595
Module_02	RP23-253N17.1	19.5701
Module_02	RP23-282C23.7	60.415
Module_02	RP23-355G16.5	8.84753
Module_02	RP23-35N23.2	38.09
Module_02	RP23-67E6.2	46.7181
Module_02	RP23-71L21.2	7.03607
Module_02	RP24-267I24.5	36.4987
Module_02	RP24-456P10.1	49.8324
Module_02	Samd3	23.613
Module_02	Sass6	22.5216
Module_02	Scn1a	52.4424
Module_02	Sept7	41.9374
Module_02	Sfrp4	23.8703
Module_02	Sgce	44.9779
Module_02	Slc35f1	59.9476
Module_02	Slco4c1	24.8487
Module_02	Slit2	54.9965
Module_02	Tenm1	44.2112
Module_02	Tmem232	46.0676
Module_02	Tmem243	64.5975
Module_02	Tnnt2	0.961008
Module_02	Tox	48.6505
Module_02	Tpr	44.4364
Module_02	Trdmt1	40.8165
Module_02	Trpc5	41.1947
Module_02	Trpc6	36.1014
Module_02	Trps1	32.5783
Module_02	Ube2d1	45.5777
Module_02	Ube2r2	40.1514
Module_02	Vmn2r55	35.7307
Module_02	Wdr17	67.4796
Module_02	Wnt9a	1.60847
Module_02	Xkr4	65.8794
Module_02	Zc3h12b	43.3672
Module_02	Zdhhc15	13.5708
Module_02	Zfp277	48.0418
Module_02	Zfp612	35.0558
Module_02	Zfp711	47.766
Module_02	Zfp810	45.3555
Module_02	Zfp994	61.2077
Module_02	Zmat1	46.3305
Module_03	AC102628.1	37.5471
Module_03	AC162689.1	17.278
Module_03	Acyp2	40.0593
Module_03	Adcy8	39.9828
Module_03	Agbl1	34.0726
Module_03	Agmo	43.1927
Module_03	Ano4	27.7593
Module_03	Apbb1ip	34.1863
Module_03	Apc	32.3667
Module_03	Arpp21	39.1765
Module_03	arsb	20.0097
Module_03	Asb5	18.6351
Module_03	Asxl3	36.4229
Module_03	B3galt1	31.6825
Module_03	Bbs9	10.7657
Module_03	Bre	28.9661
Module_03	Cd2ap	39.3675
Module_03	Cdh20	50.7946
Module_03	Celf2	51.1153
Module_03	Chrna7	26.1172
Module_03	Chsy3	54.8918
Module_03	Clvs1	20.822
Module_03	Cpne8	24.7413
Module_03	Cracr2a	4.00598
Module_03	Csmd1	40.4673
Module_03	Ctnna2	48.3554
Module_03	Dcx	31.3185
Module_03	Dlg2	52.1946
Module_03	Dlgap1	38.331
Module_03	Dnm3	35.2862
Module_03	Dock3	54.1372
Module_03	Dtwd2	23.0661
Module_03	Eda	23.7795
Module_03	Epha5	24.5348
Module_03	Epha6	40.4451
Module_03	Erap1	45.2448
Module_03	Etl4	47.9957
Module_03	Exoc4	40.7771
Module_03	Fbxo8	27.8483
Module_03	Fer	57.3334
Module_03	Fgf12	43.6679
Module_03	Fhit	57.1776
Module_03	Fmn2	45.3448
Module_03	Frmd3	38.6305
Module_03	Frmpd4	42.7847
Module_03	Gab2	29.8035
Module_03	Gabrb3	38.4627
Module_03	Galntl6	45.2023
Module_03	Gmds	53.7682
Module_03	Greb1l	16.0272
Module_03	Grik1	31.9843
Module_03	Grm8	51.2658
Module_03	Hacd1	47.3223
Module_03	Hdac9	40.5911
Module_03	Hmgcll1	57.701
Module_03	Hs6st3	34.8776
Module_03	Htr1f	50.9259
Module_03	Immp2l	55.1679
Module_03	Kcnmb2	35.6391
Module_03	Kctd16	37.4969
Module_03	Klf8	18.8157
Module_03	Lekr1	35.0261
Module_03	Lrrtm3	36.5765
Module_03	Lurap1l	8.67409
Module_03	Luzp2	40.6546
Module_03	Macrod2	56.6899
Module_03	Mageb18	44.8861
Module_03	Malt1	49.8408
Module_03	Mamld1	20.7879
Module_03	Mettl15	23.2682
Module_03	Mtm1	31.5436
Module_03	Ncoa6	50.8862
Module_03	Ndst3	37.6643
Module_03	Negr1	54.1289
Module_03	Nell1	49.0997
Module_03	Nlrp1b	14.266
Module_03	Nrg1	36.2858
Module_03	Nt5dc1	12.8407
Module_03	Park2	48.0526
Module_03	Parp8	27.0605
Module_03	Pcca	46.7366
Module_03	Pcdh15	37.5314
Module_03	Pdgfc	21.1229
Module_03	Phkb	48.1586
Module_03	Plcb1	42.5392
Module_03	Pld5	31.3529
Module_03	Ppargc1a	14.7862
Module_03	Ppp2r2b	45.7985
Module_03	Rasgef1b	24.3808
Module_03	Rev3l	21.2111
Module_03	Rgs7	42.4408
Module_03	RP23-330D3.9	56.7947
Module_03	RP23-50F19.4	35.8256
Module_03	RP23-54E16.2	34.1961
Module_03	RP24-472I15.1	16.7413
Module_03	RP24-483G17.1	59.8119
Module_03	Rpgr	19.9455
Module_03	Rtkn2	29.0444
Module_03	Samd12	58.4312
Module_03	Sbf2	50.9951
Module_03	Sema5a	34.1502
Module_03	Sema6d	36.4362
Module_03	Sfmbt1	21.6439
Module_03	Sgcd	19.6067
Module_03	Sgip1	36.8828
Module_03	Shtn1	43.4323
Module_03	Slc35f4	43.6322
Module_03	Slc9a9	46.7615
Module_03	Smap1	39.9574
Module_03	Snx7	17.1362
Module_03	Sugct	27.7164
Module_03	Tbc1d19	42.0442
Module_03	Thsd7b	34.5778
Module_03	Tmem169	3.55569
Module_03	Tpk1	42.9904
Module_03	Trip11	36.2675
Module_03	Ubap2l	6.08483
Module_03	Uty	38.3603
Module_03	Vwa8	20.1381
Module_03	Wdpcp	46.147
Module_03	Wnk1	6.67808
Module_03	Wrn	42.6105
Module_03	Zeb2	18.7291
Module_03	Zfand4	47.1017
Module_03	Zfp248	6.91644
Module_03	Zfp438	30.9658
Module_03	Zfp804b	33.7368
Module_03	Zfp820	6.63962
Module_03	Zmat4	43.8948
Module_04	AC090443.3	10.0525
Module_04	Acer3	140.74
Module_04	Adam22	139.546
Module_04	Adcy10	53.6043
Module_04	Adgrb3	189.74
Module_04	Adgrg6	191.119
Module_04	Adgrl4	113.024
Module_04	Aff2	113.886
Module_04	Agbl4	183.652
Module_04	Akap17b	162.371
Module_04	Akap6	125.565
Module_04	Akap7	148.249
Module_04	Akt3	126.696
Module_04	Ammecr1	63.1003
Module_04	Ankrd17	118.514
Module_04	Ankrd34c	88.5188
Module_04	Arap2	178.658
Module_04	Arfgef3	144.842
Module_04	Arhgap15	144.721
Module_04	Arhgap20	148.762
Module_04	Arhgap42	139.14
Module_04	Asph	47.5086
Module_04	Aspn	30.6457
Module_04	Astn2	133.77
Module_04	Atad2	116.624
Module_04	Atg4a	135.941
Module_04	Atp10b	72.8447
Module_04	Atp11b	183.093
Module_04	Atp5s	14.3805
Module_04	Atp8b1	123.238
Module_04	Atrx	160.74
Module_04	Bace2	134.919
Module_04	Bdp1	120.115
Module_04	Bicd1	153.331
Module_04	Birc6	102.199
Module_04	Bmp3	131.739
Module_04	Bmpr2	151.521
Module_04	Bod1l	54.4822
Module_04	Brca2	51.9773
Module_04	Brinp1	188.911
Module_04	Brinp3	158.322
Module_04	CAAA01180111.1	104.128
Module_04	Cacna2d1	133.975
Module_04	Cadm2	147.559
Module_04	Cadps2	170.572
Module_04	Camk4	157.527
Module_04	Cask	120.569
Module_04	Ccdc129	57.7982
Module_04	Ccdc39	152.5
Module_04	Ccdc88a	152.492
Module_04	Ccser1	184.369
Module_04	Cd46	171.092
Module_04	Cdc42bpa	152.344
Module_04	Cdh10	173.652
Module_04	Cdh11	91.9743
Module_04	Cdh12	153.279
Module_04	Cdh18	177.98
Module_04	Cdh6	139.627
Module_04	Cdk13	167.808
Module_04	Cdkl5	155.232
Module_04	Cep290	127.496
Module_04	Cep70	27.4087
Module_04	Cep83	120.465
Module_04	Cep85l	171.569
Module_04	Chd1	151.073
Module_04	Chl1	130.043
Module_04	Chrm3	141.666
Module_04	Clvs2	122.017
Module_04	Cnksr2	177.021
Module_04	Cnot4	157.933
Module_04	Cntln	154.699
Module_04	Cntn1	191.481
Module_04	Cntn4	188.665
Module_04	Cntn5	147.422
Module_04	Cntn6	151.953
Module_04	Cntnap2	119.841
Module_04	Cntnap5a	153.805
Module_04	Cog5	129.893
Module_04	Col19a1	157.951
Module_04	Copg2	115.722
Module_04	Cpeb4	121.185
Module_04	Cr1l	141.475
Module_04	Csrnp3	192.649
Module_04	Ctnna3	129.382
Module_04	Cwc27	127.889
Module_04	Cyp4x1	140.479
Module_04	Cyp7b1	40.6761
Module_04	Dcaf6	113.964
Module_04	Dcdc2a	28.3981
Module_04	Ddx10	138.005
Module_04	Dennd4a	133.437
Module_04	Dennd5b	140.483
Module_04	Dmd	198.445
Module_04	Dnah14	73.0229
Module_04	Dnajc13	118.725
Module_04	Dnajc21	45.4725
Module_04	Dock7	129.498
Module_04	Dpp10	158.269
Module_04	Dpy19l1	49.2544
Module_04	Drp2	16.4949
Module_04	Dtna	166.086
Module_04	Edil3	170.925
Module_04	Eea1	182.334
Module_04	Elavl4	138.153
Module_04	Ell2	150.373
Module_04	Epha7	152.781
Module_04	Epm2a	13.7729
Module_04	Eqtn	93.857
Module_04	Erbb4	134.946
Module_04	Ercc6l2	12.977
Module_04	Erlec1	70.6086
Module_04	Etv1	168.2
Module_04	Exph5	140.576
Module_04	F8	123.614
Module_04	Faf1	152.555
Module_04	Fam135a	90.5379
Module_04	Fam135b	111.988
Module_04	Fam13a	30.5607
Module_04	Fam172a	117.381
Module_04	Fap	141.069
Module_04	Far2	138.801
Module_04	Fbxo11	171.534
Module_04	Fbxo47	11.1677
Module_04	Fbxw7	131.71
Module_04	Fcho2	154.325
Module_04	Fgf14	150.434
Module_04	Fggy	61.0919
Module_04	Fhad1	10.5438
Module_04	Fip1l1	137.47
Module_04	Flrt2	93.7712
Module_04	Fmn1	127.433
Module_04	Fut8	167.938
Module_04	Fut9	163.981
Module_04	Fyb	12.1148
Module_04	Gabra3	143.42
Module_04	Gabrb1	174.813
Module_04	Gabrb2	187.316
Module_04	Gas2	42.0902
Module_04	Gcc2	139.518
Module_04	Gcnt4	42.2906
Module_04	Golim4	75.951
Module_04	Gpc5	186.662
Module_04	Gria3	129.032
Module_04	Gria4	160.832
Module_04	Grm7	121.182
Module_04	Gtdc1	112.609
Module_04	Hcn1	187.174
Module_04	Hdx	170.147
Module_04	Hecw1	143.894
Module_04	Herc6	169.964
Module_04	Hpgds	54.6538
Module_04	Ift81	36.3159
Module_04	Il1rap	166.344
Module_04	Il1rapl1	136.214
Module_04	Il1rapl2	151.917
Module_04	Il20rb	59.8104
Module_04	Ism1	13.2669
Module_04	Itga4	184.171
Module_04	Jakmip2	171.959
Module_04	Jph1	166.583
Module_04	Kcnh7	164.364
Module_04	Kcnip4	185.696
Module_04	Kcnj3	121.572
Module_04	Kcnt2	170.639
Module_04	Khdrbs2	101.064
Module_04	Kif3a	137.182
Module_04	Kif5c	20.9575
Module_04	Kmt2e	145.847
Module_04	Ktn1	152.443
Module_04	Lcorl	154.002
Module_04	Lgi1	126.913
Module_04	Lingo2	190.647
Module_04	Lrfn5	181.617
Module_04	Lrp1b	151.797
Module_04	Lrrc4c	164.715
Module_04	Lrrc6	89.9858
Module_04	Lrrc7	113.877
Module_04	Lrrfip2	56.4852
Module_04	Lrrtm4	145.161
Module_04	Luc7l3	136.413
Module_04	Macc1	110.073
Module_04	Magi2	157.969
Module_04	Mansc1	46.5754
Module_04	Map2	150.81
Module_04	Map3k7	117.924
Module_04	Map9	101.283
Module_04	Mbd5	174.43
Module_04	Mblac2	184.338
Module_04	Mbtps2	34.4608
Module_04	Mdga2	156.844
Module_04	Mef2c	151.023
Module_04	Megf9	142.731
Module_04	Mfsd4	49.5394
Module_04	Mkx	132.193
Module_04	Mmp16	137.59
Module_04	Mphosph8	157.376
Module_04	Mycbp2	130.696
Module_04	Mylk3	38.6369
Module_04	Myo1b	112.378
Module_04	Myo5a	93.8456
Module_04	Myo9a	185.063
Module_04	Mypn	170.676
Module_04	Naaladl2	150.037
Module_04	Nav3	177.481
Module_04	Nbea	168.525
Module_04	Ncam2	137.422
Module_04	Ncoa7	132.562
Module_04	Ncor1	77.8578
Module_04	Nemf	60.865
Module_04	Nfatc3	34.5649
Module_04	Nln	140.899
Module_04	Nol4	144.891
Module_04	Npnt	25.3528
Module_04	Nrcam	176.643
Module_04	Nrep	115.943
Module_04	Nrg3	194.795
Module_04	Nrxn1	203.684
Module_04	Nwd2	135.856
Module_04	Nxph2	121.418
Module_04	Nyap2	189.439
Module_04	Ofd1	75.1797
Module_04	Olfr690	9.25391
Module_04	Opn3	61.3405
Module_04	Orc2	35.091
Module_04	Ovgp1	45.167
Module_04	Pak3	123.303
Module_04	Pak7	146.76
Module_04	Pamr1	119.119
Module_04	Papd4	131.698
Module_04	Parm1	21.7746
Module_04	Pcdh20	52.0579
Module_04	Pcdh7	187.063
Module_04	Pcdh9	184.304
Module_04	Pclo	175.129
Module_04	Pcsk2	120.196
Module_04	Pde1a	158.376
Module_04	Pde3b	148.796
Module_04	Pgr	143.803
Module_04	Phf14	123.32
Module_04	Pkib	145.97
Module_04	Pkn2	108.575
Module_04	Plcl2	7.50279
Module_04	Pls1	18.9063
Module_04	Plxdc2	122.68
Module_04	Ppm1k	120.418
Module_04	Ppp1r12a	172.556
Module_04	Ppp2r3a	188.953
Module_04	Prkaa2	129.541
Module_04	Prkg2	107.078
Module_04	Prpf39	121.018
Module_04	Pter	10.1961
Module_04	Ptprd	190.113
Module_04	Purg	133.078
Module_04	Pvrl3	132.474
Module_04	Qser1	158.257
Module_04	R3hdm1	201.548
Module_04	Rabgap1	125.02
Module_04	Rabgap1l	183.618
Module_04	Rad51ap2	148.837
Module_04	Ralgapa1	166.374
Module_04	Ralyl	152.069
Module_04	Rapgef6	4.8785
Module_04	Rars2	12.9704
Module_04	Rasal2	168.837
Module_04	Rb1cc1	174.567
Module_04	Rbm25	171.901
Module_04	Rbm26	186.597
Module_04	Rbm41	98.2025
Module_04	Rfwd2	149.644
Module_04	Rims1	173.304
Module_04	Rims2	179.325
Module_04	Ripk2	170.85
Module_04	Rnf217	153.977
Module_04	Robo2	105.98
Module_04	Rock1	137.504
Module_04	Rorb	124.337
Module_04	RP23-147K15.4	10.1816
Module_04	RP23-156C20.1	106.022
Module_04	RP23-174M24.1	178.051
Module_04	RP23-198N22.1	173.785
Module_04	RP23-211P15.1	120.825
Module_04	RP23-243E17.1	121.397
Module_04	RP23-2A21.1	62.2325
Module_04	RP23-314A12.1	148.784
Module_04	RP23-330D3.3	123.325
Module_04	RP23-330D3.6	61.9708
Module_04	RP23-331E5.5	163.743
Module_04	RP23-355G16.1	6.57053
Module_04	RP23-360A2.8	134.678
Module_04	RP23-390N24.1	35.3529
Module_04	RP23-396C19.4	6.03947
Module_04	RP23-396N4.2	123.561
Module_04	RP23-83O23.5	43.4734
Module_04	RP24-100C12.5	107.215
Module_04	RP24-122D14.1	148.369
Module_04	RP24-134N2.1	10.6727
Module_04	RP24-177J9.4	181.399
Module_04	RP24-490H13.2	93.149
Module_04	RP24-63F2.2	83.193
Module_04	RP24-87L14.1	113.347
Module_04	Rps6ka3	191.435
Module_04	Rps6kb1	115.611
Module_04	Rsrc1	147.298
Module_04	Rundc3b	109.308
Module_04	Rxfp1	121.761
Module_04	Rxfp2	120.837
Module_04	Scai	147.479
Module_04	Scaper	196.769
Module_04	Sclt1	178.006
Module_04	Scn2a1	133.914
Module_04	Setd2	193.181
Module_04	Setd5	112
Module_04	Sgcz	167.973
Module_04	Simc1	120.353
Module_04	Six6os1	182.477
Module_04	Skap2	14.8354
Module_04	Slc16a7	195.727
Module_04	Slc24a2	119.381
Module_04	Smc3	123.943
Module_04	Smc5	145.892
Module_04	Sntg1	181.614
Module_04	Sorbs2	165.464
Module_04	Sos1	165.991
Module_04	Spag6l	76.6764
Module_04	Spata7	82.8765
Module_04	Spdya	148.106
Module_04	Sphkap	145.661
Module_04	Srgn	31.5304
Module_04	Srp54c	104.798
Module_04	St18	162.743
Module_04	St6gal2	200.349
Module_04	Stat4	25.8815
Module_04	Stau2	155.758
Module_04	Stx17	119.124
Module_04	Stxbp5	52.3384
Module_04	Stxbp5l	127.8
Module_04	Suv39h2	144.245
Module_04	Syn1	12.6072
Module_04	Syt1	159.173
Module_04	Sytl2	160.78
Module_04	Tab3	156.658
Module_04	Tanc2	145.368
Module_04	Tbc1d32	5.94394
Module_04	Tbc1d5	165.366
Module_04	Tet2	40.6238
Module_04	Thoc1	100.661
Module_04	Tlk1	177.994
Module_04	Tlk2	118.778
Module_04	Tmeff2	174.985
Module_04	Tmem196	174.436
Module_04	Trhde	185.233
Module_04	Uggt2	160.487
Module_04	Unc5c	168.958
Module_04	Unc5d	71.0161
Module_04	Unc80	98.1717
Module_04	Usf3	106.406
Module_04	Usp15	101.371
Module_04	Usp34	134.395
Module_04	Usp43	28.0854
Module_04	Vegfc	162.479
Module_04	Vmn2r84	99.1299
Module_04	Vmn2r85	118.77
Module_04	Vmn2r86	107.002
Module_04	Vmn2r87	133.624
Module_04	Vps13b	137.038
Module_04	Vrk2	78.6228
Module_04	Vwa3a	107.136
Module_04	Zcchc16	168.649
Module_04	Zcchc2	29.7566
Module_04	Zfp318	59.6272
Module_04	Zfp40	176.244
Module_04	Zfp81	178.861
Module_04	Zfp935	42.6538
Module_04	Zfp942	126.447
Module_04	Zfp950	116.464
Module_04	Zkscan16	16.2781
Module_04	ZNF654	165.505
Module_04	Zufsp	164.018
Module_05	3110021N24Rik	118.267
Module_05	8030462N17Rik	112.011
Module_05	Abcb7	9.37205
Module_05	Abcd2	83.9764
Module_05	Abce1	165.272
Module_05	AC117750.1	2.51741
Module_05	AC121113.1	138.342
Module_05	Acadsb	137.359
Module_05	Acbd5	178.904
Module_05	Acsl4	194.49
Module_05	Acvr2a	68.0896
Module_05	Adam10	76.9119
Module_05	Ahr	62.647
Module_05	Alg13	121.719
Module_05	Alms1	91.927
Module_05	Ankhd1	105.835
Module_05	Ankib1	114.888
Module_05	Ankrd28	86.1892
Module_05	Ap3s1	180.039
Module_05	Apoo	62.9441
Module_05	Appl1	121.088
Module_05	Ar	80.2146
Module_05	Arfgef1	115.237
Module_05	Arglu1	128.432
Module_05	Arhgap11a	60.4983
Module_05	Arhgap5	208.72
Module_05	Arl8b	135.102
Module_05	Asah1	79.4304
Module_05	Ascc3	145.035
Module_05	Aspa	119.816
Module_05	Atf2	191.523
Module_05	Atg3	157.382
Module_05	Atp11c	34.0203
Module_05	Atp2b1	63.3174
Module_05	Atp6v1d	80.5951
Module_05	Atr	177.7
Module_05	Bclaf1	194.014
Module_05	Bend6	80.7793
Module_05	Blzf1	119.573
Module_05	Bmpr1a	50.912
Module_05	Braf	134.392
Module_05	Brwd3	138.811
Module_05	Btbd1	113.531
Module_05	Btbd10	79.2398
Module_05	Camsap2	30.4831
Module_05	Caprin2	129.051
Module_05	Carf	154.916
Module_05	Casc4	146.887
Module_05	Casd1	3.77616
Module_05	Casp1	43.8361
Module_05	Casp8ap2	69.1949
Module_05	Cbll1	105.879
Module_05	Ccdc173	69.3365
Module_05	Ccdc174	93.0795
Module_05	Ccdc50	106.291
Module_05	Ccdc66	133.687
Module_05	Ccdc87	7.35172
Module_05	Ccnc	139.686
Module_05	Ccng1	63.2738
Module_05	Ccnh	83.951
Module_05	Cd34	69.9769
Module_05	Cd84	7.06251
Module_05	Cdc27	177.637
Module_05	Cdc40	132.88
Module_05	Cdc73	140.063
Module_05	Cdk17	39.3646
Module_05	Cenpw	114.238
Module_05	Cep170	149.809
Module_05	Cep295	112.661
Module_05	Cep350	80.9205
Module_05	Cerkl	38.9987
Module_05	Cetn3	188.851
Module_05	Cfap36	12.4248
Module_05	CHDC2	90.8221
Module_05	Chgb	64.7037
Module_05	Chic1	82.671
Module_05	Chm	141.127
Module_05	Chpt1	177.512
Module_05	Chrdl1	105.798
Module_05	Ckap5	33.5488
Module_05	Cldn34c1	85.9402
Module_05	Clock	180.767
Module_05	Cmc4	8.44089
Module_05	Cnot6l	81.6668
Module_05	Cops2	138.508
Module_05	Cox20	74.6627
Module_05	Cox6c	141.917
Module_05	Cpeb2	89.6238
Module_05	Crls1	124.53
Module_05	Csnk1g3	161.116
Module_05	Cul3	204.937
Module_05	Cwc22	74.239
Module_05	Cwf19l2	128.409
Module_05	Dazl	33.0903
Module_05	Dcun1d1	121.337
Module_05	Ddx3x	70.8925
Module_05	Dis3	139.881
Module_05	Dld	141.174
Module_05	Dlg1	117.068
Module_05	Dmxl1	186.197
Module_05	Dmxl2	124.791
Module_05	Dnajc8	114.295
Module_05	Dnm1l	134.004
Module_05	Dnttip2	114.896
Module_05	Dopey1	170.956
Module_05	Dynlt3	171.667
Module_05	Dzip3	90.1264
Module_05	Ebag9	167.601
Module_05	Eid1	106.679
Module_05	Eif2ak2	23.5502
Module_05	Eif2s3y	146.359
Module_05	Eif3a	137.488
Module_05	Eif5b	103.457
Module_05	Elp4	76.493
Module_05	Emc2	171.937
Module_05	Erbb2ip	170.291
Module_05	Ergic2	193.842
Module_05	Esco1	165.492
Module_05	Esf1	149.316
Module_05	Evi5	87.7924
Module_05	Fam76b	70.9962
Module_05	Fam81a	111.008
Module_05	Fancm	79.6226
Module_05	Far1	125.98
Module_05	Fgd4	80.3619
Module_05	Fgf9	98.4547
Module_05	Fmr1	187.983
Module_05	Fnip1	173.828
Module_05	Foxj3	134.451
Module_05	Gabra1	180.344
Module_05	Gabra4	116.236
Module_05	Gabrg2	122.188
Module_05	Galnt1	129.561
Module_05	Gda	115.906
Module_05	Gdap1	68.2802
Module_05	Ggps1	100.211
Module_05	Gin1	33.1693
Module_05	Gk	142.769
Module_05	Glrb	169.967
Module_05	Gnai1	134.88
Module_05	Gnl2	73.1698
Module_05	Golga5	31.8909
Module_05	Gopc	130.253
Module_05	Gpm6a	154.813
Module_05	Gpm6b	82.1529
Module_05	Gria2	109.41
Module_05	Gtf2h1	89.1568
Module_05	Gtpbp4	55.1309
Module_05	Hapln1	35.5072
Module_05	Haus6	127.37
Module_05	Hdgfrp3	194.691
Module_05	Hectd2	77.287
Module_05	Hells	135.281
Module_05	Herpud2	141.628
Module_05	Hgf	143.742
Module_05	Hltf	71.6965
Module_05	Hmgcs1	139.591
Module_05	Hnmt	129.605
Module_05	Hook1	166.61
Module_05	Hsbp1l1	107.092
Module_05	Hsp90aa1	31.6201
Module_05	Ice2	64.1367
Module_05	Ift57	100.577
Module_05	Ift74	108.23
Module_05	Igip	153.72
Module_05	Immp1l	143.121
Module_05	Impad1	143.952
Module_05	Ints13	105.305
Module_05	Ipcef1	81.9006
Module_05	Iqcb1	183.149
Module_05	Itgav	146.467
Module_05	Itsn2	124.128
Module_05	Jade3	77.402
Module_05	Kansl1l	135.268
Module_05	Kdm4c	93.587
Module_05	Kdm6a	160.557
Module_05	Klhl23	86.6615
Module_05	Klhl6	64.8778
Module_05	Kpna3	169.489
Module_05	Kras	158.169
Module_05	Krcc1	86.2157
Module_05	Krt222	94.3097
Module_05	Lactb2	94.2272
Module_05	Lamp2	122.963
Module_05	Lin28b	20.0291
Module_05	Lin54	146.862
Module_05	Lmbrd1	127.219
Module_05	Lmbrd2	100.435
Module_05	Lmo4	49.1084
Module_05	Lnpk	162.673
Module_05	Lrch2	116.492
Module_05	Lrif1	119.903
Module_05	Lrrtm2	99.9261
Module_05	Lztfl1	101.475
Module_05	Mal2	180.043
Module_05	Mampt	77.2307
Module_05	Map7d2	90.4509
Module_05	Mapk8	143.521
Module_05	Mapk9	107.994
Module_05	March7	149.877
Module_05	Mastl	74.8435
Module_05	Med13	139.286
Module_05	Med14	126.34
Module_05	Mfap3l	158.873
Module_05	Mga	110.525
Module_05	Micu3	170.974
Module_05	Mios	159.563
Module_05	Mob1b	105.126
Module_05	Mphosph10	144.458
Module_05	Mplkip	18.9734
Module_05	Mpv17l	119.973
Module_05	Mrpl1	144.586
Module_05	Mrpl32	80.7434
Module_05	Msmo1	125.519
Module_05	Mtdh	143.294
Module_05	Mterf1a	19.9588
Module_05	Mtmr2	160.04
Module_05	Mtpn	127.963
Module_05	Mtx2	187.264
Module_05	Mybl1	158.432
Module_05	Myh3	148.109
Module_05	Mzt1	98.573
Module_05	Naa30	171.595
Module_05	Nae1	122.012
Module_05	Ncl	65.6718
Module_05	Necab1	141.271
Module_05	Nek7	120.192
Module_05	Neurod6	74.782
Module_05	Nipa1	166.797
Module_05	Nipbl	116.954
Module_05	Nmd3	172.923
Module_05	Npat	199.828
Module_05	Nr3c1	114.44
Module_05	Nr4a2	111.313
Module_05	Nsun3	93.105
Module_05	Ocrl	45.7402
Module_05	Ola1	148.167
Module_05	Opalin	69.2868
Module_05	Optn	111.24
Module_05	Orc4	191.32
Module_05	Osgepl1	167.005
Module_05	Papolg	117.842
Module_05	Pcm1	164.547
Module_05	Pcmtd1	173.261
Module_05	Pdcd10	140.407
Module_05	Pex3	110.001
Module_05	Pex7	72.9183
Module_05	Pgm2l1	117.017
Module_05	Phf10	115.912
Module_05	Phf20l1	102.311
Module_05	Phip	117.94
Module_05	Picalm	107.024
Module_05	Pigb	19.3609
Module_05	Pnpla8	165.137
Module_05	Pnpt1	132.233
Module_05	Polk	51.671
Module_05	Ppip5k2	165.397
Module_05	Ppp3cb	91.1878
Module_05	Ppp4r3b	136.22
Module_05	Prex2	140.634
Module_05	Prkci	59.9309
Module_05	Prpf38b	110.797
Module_05	Prpf40a	188.701
Module_05	Prps2	146.174
Module_05	Psd3	182.643
Module_05	Psmc6	173.552
Module_05	Psme4	95.2647
Module_05	Ptbp2	143.908
Module_05	Pten	171.896
Module_05	Ptn	78.9675
Module_05	Ptpn4	162.845
Module_05	Rab2a	168.115
Module_05	Rab6a	145.897
Module_05	Rabep1	162.696
Module_05	Ranbp2	136.616
Module_05	Rasa1	49.3059
Module_05	Rbbp8	85.4568
Module_05	Rbm11	30.6629
Module_05	Rbm27	93.987
Module_05	Reps2	134.286
Module_05	Rfx7	129.164
Module_05	Rif1	143.634
Module_05	Rlf	136.088
Module_05	Rnf115	83.9983
Module_05	Rnf130	72.323
Module_05	Rnpc3	11.7512
Module_05	Rock2	104.053
Module_05	RP23-147O14.2	139.705
Module_05	RP23-17C12.7	64.2316
Module_05	RP23-200C3.1	101.764
Module_05	RP23-208E23.3	34.8528
Module_05	RP23-214L4.1	126.524
Module_05	RP23-218L17.1	186.766
Module_05	RP23-26N21.1	113.914
Module_05	RP23-316L10.3	3.58884
Module_05	RP23-331A21.2	105.194
Module_05	RP23-332K10.1	114.574
Module_05	RP23-343E20.2	123.194
Module_05	RP23-35L3.1	151.989
Module_05	RP23-39I7.3	127.833
Module_05	RP23-55L3.5	123.146
Module_05	RP23-90C6.3	60.9901
Module_05	RP23-96I9.2	141.611
Module_05	RP24-179D17.1	169.532
Module_05	RP24-406I15.2	44.1644
Module_05	RP24-408B13.1	152.351
Module_05	RP24-562O19.3	82.3117
Module_05	RP24-63F2.1	95.8087
Module_05	Rpgrip1l	204.274
Module_05	Rpl21	126.92
Module_05	Rpp30	33.6885
Module_05	Rspo3	87.2445
Module_05	Rtf1	66.2406
Module_05	Rtn4	175.733
Module_05	Rwdd1	187.089
Module_05	Sacs	85.1264
Module_05	Saxo2	73.4918
Module_05	Scel	11.5108
Module_05	Scg3	130.485
Module_05	Sec62	134.972
Module_05	Sec63	155.483
Module_05	Sema3a	131.888
Module_05	Senp6	159.791
Module_05	Sept6	54.6984
Module_05	Serinc1	85.5088
Module_05	Serpini1	172.579
Module_05	Sgtb	147.481
Module_05	Sh3glb1	172.721
Module_05	Sh3yl1	0.784025
Module_05	Shoc2	162.15
Module_05	Shprh	66.9596
Module_05	Slc16a4	130.689
Module_05	Slc25a46	134.675
Module_05	Slc44a1	116.549
Module_05	Slc4a10	131.554
Module_05	Slf1	155.957
Module_05	Slitrk2	108.707
Module_05	Slitrk4	111.845
Module_05	Sltm	95.6118
Module_05	Smc1a	62.8335
Module_05	Smc2	157.568
Module_05	Smc4	12.2259
Module_05	Smc6	161.983
Module_05	Smim10l1	186.543
Module_05	Snrpb2	150.573
Module_05	Snrpd1	97.6768
Module_05	Snx13	183.935
Module_05	Snx2	154.785
Module_05	Sp4	105.755
Module_05	Spata6	46.1977
Module_05	Spopl	182.764
Module_05	Srsf12	67.6577
Module_05	Ssx2ip	70.9074
Module_05	Stag2	88.6328
Module_05	Strn3	110.047
Module_05	Sucla2	58.1704
Module_05	Sycp2	132.993
Module_05	Tab2	94.5334
Module_05	Taf4b	154.468
Module_05	Taok1	182.479
Module_05	Tcerg1	92.7177
Module_05	Tdrd3	142.049
Module_05	Terf1	108.883
Module_05	Tex10	112.537
Module_05	Tfrc	161.131
Module_05	Tgs1	67.924
Module_05	Thoc2	160.718
Module_05	Tm9sf3	153.212
Module_05	Tmem167	112.089
Module_05	Tmem30a	92.8755
Module_05	Tmem5	21.3026
Module_05	Tmx3	92.5844
Module_05	Top2b	158.388
Module_05	Tpp2	144.534
Module_05	Trim33	143.053
Module_05	Trpc1	124.272
Module_05	Tsc22d2	140.852
Module_05	Ttc14	111.444
Module_05	Ttc19	109.725
Module_05	Ttc3	117.132
Module_05	Ttll7	139.264
Module_05	Ttr	10.6248
Module_05	Ube2g1	116.902
Module_05	Ube3a	168.934
Module_05	Ubr3	159.96
Module_05	Uchl5	180.595
Module_05	Ufsp2	171.939
Module_05	Usp1	118.532
Module_05	Usp32	30.5471
Module_05	Usp8	177.084
Module_05	Usp9x	160.479
Module_05	Vgll3	70.2163
Module_05	Vma21	146.311
Module_05	Vps26a	130.154
Module_05	Vps41	90.9585
Module_05	Wac	191.359
Module_05	Wapl	131.725
Module_05	Wasl	169.694
Module_05	Wdr26	90.4468
Module_05	Wdr44	128.927
Module_05	Wls	98.2553
Module_05	Wwp1	53.7943
Module_05	Xrn2	145.929
Module_05	Ythdc2	156.712
Module_05	Zc2hc1a	153.702
Module_05	Zc3h14	184.759
Module_05	Zcchc11	86.7714
Module_05	Zdhhc2	163.091
Module_05	Zfand5	169.47
Module_05	Zfml	187.237
Module_05	Zfp120	158.708
Module_05	Zfp131	152.039
Module_05	Zfp148	84.2812
Module_05	Zfp157	147.698
Module_05	Zfp160	156.362
Module_05	Zfp260	190.496
Module_05	Zfp273	101.928
Module_05	Zfp280c	154.368
Module_05	Zfp280d	115.143
Module_05	Zfp292	183.364
Module_05	Zfp322a	133.103
Module_05	Zfp354a	139.51
Module_05	Zfp354c	82.6401
Module_05	Zfp37	119.279
Module_05	Zfp386	135.121
Module_05	Zfp442	89.7615
Module_05	Zfp458	182.048
Module_05	Zfp51	90.38
Module_05	Zfp52	127.169
Module_05	Zfp595	118.113
Module_05	Zfp605	117.339
Module_05	Zfp606	48.5743
Module_05	Zfp65	136.691
Module_05	Zfp712	133.486
Module_05	Zfp72	103.898
Module_05	Zfp729b	110.615
Module_05	Zfp738	195.604
Module_05	Zfp748	90.4243
Module_05	Zfp770	134.942
Module_05	Zfp788	174.287
Module_05	Zfp800	193.107
Module_05	Zfp846	48.3469
Module_05	Zfp85	108.162
Module_05	Zfp933	173.462
Module_05	Zfp943	129.567
Module_05	Zfp945	157.119
Module_05	Zfp948	105.528
Module_05	Zfp955a	48.5635
Module_05	Zfp958	126.398
Module_05	Zfpm2	48.4441
Module_05	Zfr	165.874
Module_05	Zfyve9	84.6144
Module_05	Zgrf1	64.6286
Module_05	Zmym2	170.765
Module_06	Abhd17b	22.1821
Module_06	Arhgap21	6.25477
Module_06	Atad1	26.621
Module_06	Brd7	22.1754
Module_06	Cdkn2aip	27.1599
Module_06	Cmpk1	28.7531
Module_06	Col4a3bp	24.5632
Module_06	Ctdspl2	29.1934
Module_06	Cul1	27.1436
Module_06	Dclre1a	18.6642
Module_06	Ddx26b	7.54017
Module_06	Dync2h1	6.68792
Module_06	Efr3a	4.23121
Module_06	Emb	4.77633
Module_06	Exoc2	22.9414
Module_06	Exoc5	27.9631
Module_06	Fam199x	26.532
Module_06	Gls	30.3587
Module_06	Gpcpd1	31.7522
Module_06	Hmgb1	21.2689
Module_06	Hook3	28.8473
Module_06	Ipo11	6.86624
Module_06	Iws1	6.32385
Module_06	Klhl15	21.939
Module_06	Krt12	7.37223
Module_06	Larp4	25.314
Module_06	Map2k4	16.6634
Module_06	Mest	3.02411
Module_06	Morc2b	5.94203
Module_06	Naa15	22.7907
Module_06	Nbeal1	29.6825
Module_06	Ngly1	24.8656
Module_06	Nrn1	21.3854
Module_06	Pcnp	27.9758
Module_06	Phf3	16.2303
Module_06	Plaa	32.86
Module_06	Pmaip1	7.23339
Module_06	Pou3f2	27.6869
Module_06	Psmd14	24.6276
Module_06	Qk	19.6673
Module_06	Rala	27.5528
Module_06	Rbm3	21.2418
Module_06	Rnf2	28.3202
Module_06	RP24-353D23.1	21.8752
Module_06	Sacm1l	30.2033
Module_06	Scn7a	28.521
Module_06	Scyl2	27.4728
Module_06	Slain1	2.49832
Module_06	Slc25a36	30.1087
Module_06	Sp3	26.8558
Module_06	Spata32	6.03495
Module_06	Styx	27.6375
Module_06	Syncrip	21.9699
Module_06	Tcea1	25.3686
Module_06	Tlr3	28.9579
Module_06	Tmem65	28.9048
Module_06	Tmtc3	22.61
Module_06	Trip12	30.8779
Module_06	Ttc21b	6.82107
Module_06	Tyw5	3.21087
Module_06	Ube2w	25.4164
Module_06	Uevld	27.4004
Module_06	Usp25	24.8544
Module_06	Usp47	16.6534
Module_06	Usp53	31.0984
Module_06	Xpo4	11.5204
Module_06	Ythdf3	27.9705
Module_06	Zbtb10	26.7607
Module_06	Zdhhc21	30.5294
Module_06	Zfp101	33.3408
Module_06	Zfp326	30.6577
Module_06	Zfp367	29.7913
Module_06	Zfp9	5.25984
Module_06	Zfp938	27.1076
Module_06	Zranb1	25.5692
Module_07	AC139063.2	13.0247
Module_07	Acot9	17.293
Module_07	Akap11	30.444
Module_07	Ankef1	13.0593
Module_07	Anp32a	26.4066
Module_07	Arhgef9	10.249
Module_07	Arl6	9.26226
Module_07	Arpp19	35.2109
Module_07	Asah2	30.7705
Module_07	Atrn	4.70148
Module_07	B3galt2	50.4715
Module_07	Bcas2	15.395
Module_07	Brcc3	45.7713
Module_07	Btbd8	22.3907
Module_07	Catip	5.23262
Module_07	Ccdc112	3.81554
Module_07	Ccdc186	22.8455
Module_07	Ccdc47	29.2325
Module_07	Ccdc82	32.5693
Module_07	Cdh7	24.0727
Module_07	Cdk11b	8.00362
Module_07	Cenpc1	30.4068
Module_07	Cep126	37.0904
Module_07	Cfap206	10.6173
Module_07	CH25-588N10.2	33.0206
Module_07	Cul4b	31.36
Module_07	Ddx1	4.03157
Module_07	Dek	45.8774
Module_07	Denr	24.1007
Module_07	Dkc1	11.2533
Module_07	Dnajc2	38.2494
Module_07	Dram1	20.94
Module_07	Dynlrb1	30.4299
Module_07	Elmod1	34.3979
Module_07	Enpp6	48.6348
Module_07	Epc2	35.0492
Module_07	Fam92a	46.7849
Module_07	Glra3	26.8816
Module_07	Gpr22	35.5885
Module_07	Gpr34	29.7396
Module_07	Grsf1	31.8913
Module_07	Hif1a	45.9425
Module_07	Hnrnpdl	30.6332
Module_07	Hpgd	5.05992
Module_07	Hspa4l	38.9226
Module_07	Ift20	10.2811
Module_07	Il33	35.597
Module_07	Itgb8	32.7264
Module_07	Kcnv1	43.396
Module_07	Kif18a	2.18701
Module_07	Kiz	1.392
Module_07	Klhl4	24.5461
Module_07	Lgi2	17.5704
Module_07	Lpar6	37.5202
Module_07	Mbnl1	24.5702
Module_07	Mpp5	24.7304
Module_07	Mthfd2l	14.2791
Module_07	Mut	28.4849
Module_07	Myom3	5.49153
Module_07	Mysm1	29.727
Module_07	Nol8	38.9451
Module_07	Npy1r	34.0415
Module_07	Ogfrl1	49.6718
Module_07	Omg	37.6458
Module_07	Pcsk1	27.6711
Module_07	Pdik1l	40.9101
Module_07	Pja2	12.0493
Module_07	Plp1	12.479
Module_07	Ppil4	33.2866
Module_07	Ppp1r42	14.6786
Module_07	Prepl	17.2459
Module_07	Prrg1	27.1724
Module_07	Rab27b	18.5696
Module_07	Rab39b	34.8072
Module_07	Rfc4	22.8357
Module_07	Rgs4	23.7835
Module_07	Rgs7bp	8.79581
Module_07	RP23-221O14.10	4.55767
Module_07	RP23-275N21.2	45.3239
Module_07	RP23-284F8.1	39.4127
Module_07	RP23-325I3.1	14.7362
Module_07	RP23-47M24.3	12.677
Module_07	RP23-67E6.5	43.2705
Module_07	RP23-83O23.2	31.0077
Module_07	RP23-86F8.3	28.3201
Module_07	RP24-251F16.4	21.1456
Module_07	RP24-269A16.1	32.1621
Module_07	RP24-562O19.4	30.1035
Module_07	Rsrc2	33.9105
Module_07	Scoc	41.9531
Module_07	Sema3e	1.84
Module_07	Shcbp1	13.5044
Module_07	Slk	38.8035
Module_07	Smarca1	34.9742
Module_07	Snap25	29.542
Module_07	Snca	8.02126
Module_07	Snx4	18.0295
Module_07	Socs6	15.5574
Module_07	Srsf11	36.695
Module_07	Ssb	42.3716
Module_07	Ssbp1	32.1794
Module_07	St8sia4	11.8333
Module_07	Sumo1	43.9071
Module_07	Tank	35.7155
Module_07	Tex14	10.9135
Module_07	Tial1	33.0343
Module_07	Tmeff1	10.9396
Module_07	Tmem184c	48.7517
Module_07	Tnfsf10	16.8303
Module_07	Triqk	22.7547
Module_07	Trmt10c	38.481
Module_07	Tspan2	22.7507
Module_07	Tusc3	4.31384
Module_07	Twistnb	30.9465
Module_07	Txlng	3.3025
Module_07	Uba6	43.4361
Module_07	Ufl1	10.8361
Module_07	Vcpip1	25.0304
Module_07	Vsnl1	28.8818
Module_07	Vstm2a	42.7719
Module_07	Yaf2	11.9401
Module_07	Zfp300	20.7228
Module_07	Zfp459	15.1441
Module_07	Zfp62	41.0377
Module_07	Zfp758	39.482
Module_07	Zfp759	39.931
Module_07	Zfp825	2.24205
Module_07	Zfp930	34.1356
Module_07	Zfp944	33.066
Module_07	Zfp946	41.5004
Module_07	Zfp955b	6.88957
Module_07	Zranb2	31.7546
Module_07	Zrsr1	7.62425
Module_08	2900055J20Rik	22.765
Module_08	Abca5	40.191
Module_08	Abcb1b	21.2281
Module_08	AC123679.2	13.6104
Module_08	Adamts20	21.9692
Module_08	Ago3	14.282
Module_08	Agps	27.0084
Module_08	Akap10	32.345
Module_08	Arfgap3	22.0708
Module_08	Arih1	27.9429
Module_08	Ash1l	27.1816
Module_08	Asxl2	37.7855
Module_08	Atad2b	27.1172
Module_08	Bnip2	11.5271
Module_08	Bora	14.6079
Module_08	Caap1	27.5182
Module_08	Cage1	25.0248
Module_08	Car8	22.003
Module_08	Carnmt1	23.748
Module_08	Casp3	22.8873
Module_08	Ccl28	12.733
Module_08	Ccnyl1	20.319
Module_08	Cdh2	27.4804
Module_08	Cdk14	25.2608
Module_08	Cfap69	39.4246
Module_08	Cir1	24.685
Module_08	Cnep1r1	13.3093
Module_08	Cnot2	32.8213
Module_08	Cpsf6	11.9721
Module_08	Cstf3	23.0838
Module_08	Cwh43	16.5157
Module_08	Cyp39a1	19.2255
Module_08	Dcaf10	14.8266
Module_08	Dclre1c	12.6887
Module_08	Ddhd1	16.4499
Module_08	Ddx46	18.6279
Module_08	Dennd1b	20.3887
Module_08	Dennd4c	38.2488
Module_08	Dennd6a	32.632
Module_08	Dync1i2	29.3554
Module_08	Edem3	26.0818
Module_08	Ero1lb	11.1218
Module_08	Etfa	11.0266
Module_08	Exoc6	17.4722
Module_08	Fam35a	23.8906
Module_08	Fam49b	35.8613
Module_08	Fam63b	16.4416
Module_08	Fndc3a	1.44588
Module_08	Fsd1l	31.4712
Module_08	Fubp1	31.0906
Module_08	Fxr1	28.7592
Module_08	Gbe1	27.9009
Module_08	Gsk3b	17.3475
Module_08	Gtpbp8	6.66995
Module_08	Herc4	32.0471
Module_08	Hspb3	22.7632
Module_08	Ifih1	25.2989
Module_08	Ino80	21.732
Module_08	Ints6	18.6692
Module_08	Kat6a	12.5033
Module_08	Kdm7a	28.9113
Module_08	Kif2a	15.7853
Module_08	Lama2	17.4399
Module_08	Lin52	6.9289
Module_08	Lnpep	26.009
Module_08	Lpcat2	26.821
Module_08	Lpgat1	27.6529
Module_08	Ly96	12.1047
Module_08	Map3k2	26.3338
Module_08	Met	23.2769
Module_08	Mia2	10.0633
Module_08	Mtf2	18.5668
Module_08	Mthfd1l	17.7647
Module_08	Mybpc1	4.46124
Module_08	Myo6	21.437
Module_08	N4bp2l2	35.0748
Module_08	Nap1l1	16.6711
Module_08	Nars2	7.38043
Module_08	Nptn	21.2551
Module_08	Nxf7	10.1806
Module_08	Ophn1	19.9789
Module_08	Pard3b	7.85794
Module_08	Pde5a	32.6728
Module_08	Pdgfd	26.4159
Module_08	Pds5a	23.1764
Module_08	Pdss1	25.8627
Module_08	Pgm1	19.5621
Module_08	Phc3	14.4253
Module_08	Pias2	39.2175
Module_08	Pibf1	10.9496
Module_08	Pnisr	12.1449
Module_08	Pou2f1	19.8513
Module_08	Prdm9	36.3995
Module_08	Prn	17.3871
Module_08	Prpf4b	24.0255
Module_08	Pspc1	40.828
Module_08	Ptpn12	9.09859
Module_08	Ptpn2	29.2448
Module_08	Rab30	32.5162
Module_08	Rad17	19.2327
Module_08	Rai14	21.5808
Module_08	Rap1a	22.4153
Module_08	Rb1	25.799
Module_08	Rcor3	31.5135
Module_08	Reep3	27.4926
Module_08	Reps1	24.4715
Module_08	Ric1	6.77089
Module_08	Rmdn1	32.0936
Module_08	Rnf138	17.5988
Module_08	Rnf152	9.44415
Module_08	Rnf38	16.0043
Module_08	Rngtt	13.3564
Module_08	RP23-74O4.1	24.9046
Module_08	RP24-258O12.2	27.9345
Module_08	RP24-372E2.1	27.7549
Module_08	Rsbn1l	20.3182
Module_08	Rsl1	17.3973
Module_08	Rspry1	16.3414
Module_08	Rufy2	3.92251
Module_08	Scfd1	14.7426
Module_08	Sec61a2	18.2038
Module_08	Sema3c	7.49801
Module_08	Slain2	24.6995
Module_08	Slc25a32	18.3489
Module_08	Slf2	27.885
Module_08	Smchd1	29.1915
Module_08	Spata1	10.1966
Module_08	Spata5	26.6486
Module_08	Srek1	16.3926
Module_08	Srsf5	14.4041
Module_08	St7l	28.521
Module_08	Stxbp3	32.7884
Module_08	Stxbp4	3.20679
Module_08	Supt3	12.4478
Module_08	Swt1	18.4854
Module_08	Tada2a	20.5717
Module_08	Taf15	14.8571
Module_08	Tbc1d12	35.1525
Module_08	Tbc1d23	2.61474
Module_08	Tcf12	32.195
Module_08	Tfdp2	31.0342
Module_08	Tmem161b	25.2798
Module_08	Tmem200a	7.32628
Module_08	Top1	7.3464
Module_08	Trmt11	36.4208
Module_08	Trpm7	35.1684
Module_08	Txlnb	6.9636
Module_08	U2surp	15.9313
Module_08	Uhrf1bp1l	15.181
Module_08	Vmp1	11.8955
Module_08	Vps54	32.5054
Module_08	Zbtb1	23.3374
Module_08	Zfc3h1	37.9887
Module_08	Zfyve16	36.917
Module_08	Zmym4	22.8152
Module_08	Zwilch	6.60354
Module_09	AC099860.1	16.9766
Module_09	Acsl3	19.8644
Module_09	Agfg1	29.8609
Module_09	Ankrd26	14.013
Module_09	Arl13b	11.6424
Module_09	Bmi1	20.2743
Module_09	Bnip3	21.8927
Module_09	Cab39l	10.5806
Module_09	Calcrl	8.09467
Module_09	Capn7	15.4424
Module_09	Cast	19.5006
Module_09	Ccny	18.6184
Module_09	Cnot11	13.746
Module_09	Cpq	9.8788
Module_09	Creb1	26.7297
Module_09	Creg2	12.8519
Module_09	Cse1l	23.0546
Module_09	Cul5	19.6588
Module_09	Ddit4l	11.3374
Module_09	Echdc1	18.7572
Module_09	Eps15	21.9245
Module_09	Fam169a	27.2305
Module_09	Fam171b	11.6141
Module_09	Fam208b	28.2321
Module_09	Fam217b	10.7307
Module_09	Fbxw2	18.5
Module_09	Frrs1l	24.2829
Module_09	Frzb	5.05313
Module_09	Gbp7	8.03642
Module_09	Gigyf2	13.0849
Module_09	Gkn3	11.1301
Module_09	Gng2	15.032
Module_09	Havcr2	11.2399
Module_09	Hdac2	19.5739
Module_09	Hnrnph2	14.4221
Module_09	Ifit2	17.2377
Module_09	Il15	15.882
Module_09	Itch	22.5074
Module_09	Kdelc2	23.0972
Module_09	Kifap3	23.7267
Module_09	Kpna4	18.0915
Module_09	Krit1	19.2851
Module_09	Lix1	6.1726
Module_09	Mier1	22.9245
Module_09	Mkln1	20.2679
Module_09	Mndal	17.7397
Module_09	Msl2	17.9929
Module_09	Myef2	4.6312
Module_09	Myl12b	6.57879
Module_09	Napb	6.5553
Module_09	Ndufb4	18.4209
Module_09	Nop58	23.9275
Module_09	Nudt12	18.5929
Module_09	Nudt4	17.2397
Module_09	Nufip2	9.36889
Module_09	Papd5	17.4669
Module_09	Pbrm1	12.5492
Module_09	Pik3c2a	26.0345
Module_09	Pikfyve	21.4609
Module_09	Pin4	13.7378
Module_09	Plk4	18.5396
Module_09	Ptbp3	19.9299
Module_09	Rab10	23.7342
Module_09	Rab28	20.5653
Module_09	Rbbp6	11.066
Module_09	Rgs5	23.4192
Module_09	Ripk1	25.4339
Module_09	Rnf146	10.5411
Module_09	RP23-118M23.1	16.8392
Module_09	RP23-122F3.1	23.0867
Module_09	RP23-214M22.3	8.4286
Module_09	RP23-252E4.2	17.3525
Module_09	RP23-331E5.6	27.4434
Module_09	Sav1	20.0473
Module_09	Sc5d	8.03403
Module_09	Sdhaf3	16.7248
Module_09	Sdpr	14.475
Module_09	Sirt1	6.02257
Module_09	Skiv2l2	13.5749
Module_09	Slc30a4	16.2202
Module_09	Smim13	16.0697
Module_09	Swi5	13.9704
Module_09	Tbp	20.6532
Module_09	Tbr1	11.9709
Module_09	Tdp2	23.3585
Module_09	Tet1	5.21479
Module_09	Tifa	9.81777
Module_09	Timm9	27.0075
Module_09	Tipin	18.316
Module_09	Tlr7	13.1916
Module_09	Tmem14a	13.7754
Module_09	Tmem170b	25.7326
Module_09	Tmem56	32.7855
Module_09	Topors	15.739
Module_09	Trim7	19.2715
Module_09	Trmt6	21.6622
Module_09	Txndc17	16.9359
Module_09	Ube2q2	26.6672
Module_09	Ubxn7	24.3957
Module_09	Ulk2	25.7055
Module_09	Usp16	12.4348
Module_09	Utp3	32.2465
Module_09	Vkorc1l1	20.2118
Module_09	Vps50	18.9305
Module_09	Ywhah	7.32403
Module_09	Zbtb44	19.82
Module_09	Zdhhc13	13.5944
Module_09	Zdhhc20	21.0644
Module_09	Zfp141	20.3843
Module_09	Zfp146	14.3812
Module_09	Zfp207	13.7177
Module_09	Zfp27	20.1522
Module_09	Zfp354b	14.3595
Module_09	Zfp74	12.9738
Module_09	Zfp780b	11.1889
Module_09	Zfp874b	16.0521
Module_09	Zfp91	11.9618
Module_09	Zfp951	4.47971
Module_09	Zkscan1	4.67987
Module_10	Acaca	13.4976
Module_10	Adamts18	10.3245
Module_10	Adgrl2	14.629
Module_10	Aig1	33.7827
Module_10	Ak5	33.0792
Module_10	Amph	21.3757
Module_10	Ankrd44	17.0998
Module_10	Arl15	22.7451
Module_10	Atad5	17.8762
Module_10	Atp13a5	40.8614
Module_10	Bach2	39.4505
Module_10	Cacng3	20.2385
Module_10	Camkmt	37.9647
Module_10	Car5b	2.86837
Module_10	Clstn2	39.8156
Module_10	Clybl	9.73627
Module_10	Cobl	15.4379
Module_10	Commd10	10.6505
Module_10	Cpne9	11.5249
Module_10	Ctnnd2	23.5165
Module_10	Daam1	5.29525
Module_10	Dcdc2c	44.6349
Module_10	Ddb2	0.78274
Module_10	Dennd1a	31.6812
Module_10	Diaph3	5.97847
Module_10	Dnah5	7.31381
Module_10	Dnajc1	5.2342
Module_10	Dock4	32.6391
Module_10	Dscam	34.0054
Module_10	Dst	4.3376
Module_10	Ebf1	15.6701
Module_10	Egfr	22.291
Module_10	Elovl7	6.8546
Module_10	Erc2	25.591
Module_10	Erg	2.94736
Module_10	Etv6	12.2971
Module_10	Ewsr1	2.53264
Module_10	Exoc6b	33.5704
Module_10	Ext1	10.8115
Module_10	Fam155a	18.9493
Module_10	Fam189a1	23.9554
Module_10	Fam193a	30.3005
Module_10	Fbxo34	13.4792
Module_10	Frmd4a	21.5221
Module_10	Fstl4	15.9699
Module_10	Galnt3	13.6286
Module_10	Garnl3	31.5718
Module_10	Golgb1	14.0279
Module_10	Gpatch8	38.5963
Module_10	Gprasp1	22.1561
Module_10	Grin2a	43.1319
Module_10	Hdac8	21.0621
Module_10	Hrh2	0.830765
Module_10	Hs3st2	17.7438
Module_10	Hs3st4	38.0511
Module_10	Hsf5	19.0421
Module_10	Ift88	17.7906
Module_10	Itga1	19.6314
Module_10	Itgb3	1.07431
Module_10	Jazf1	23.9039
Module_10	Kalrn	20.1334
Module_10	Kcnj6	32.9992
Module_10	Kcnq3	43.3143
Module_10	Khdrbs3	20.6447
Module_10	Kmt2c	31.9997
Module_10	Large	34.5482
Module_10	Ldb2	17.72
Module_10	Ldlrad3	15.5256
Module_10	Ldlrad4	37.3205
Module_10	Magi1	45.0634
Module_10	March11	21.6952
Module_10	Mecom	25.5016
Module_10	Mitf	22.3445
Module_10	Murc	3.88119
Module_10	Myo1d	8.97865
Module_10	Nckap5	20.9505
Module_10	Ncoa1	26.8797
Module_10	Nf1	16.8115
Module_10	Nlk	30.1286
Module_10	Nme7	34.8993
Module_10	Nos1ap	20.9397
Module_10	Ntm	26.505
Module_10	Ntrk3	29.7202
Module_10	Nxpe4	8.29346
Module_10	Opcml	21.3896
Module_10	Osbpl6	34.2096
Module_10	Otud7a	34.3456
Module_10	P3h2	31.6613
Module_10	Palmd	12.8357
Module_10	Pan3	29.4279
Module_10	Pcolce2	10.9345
Module_10	Pde8a	5.07462
Module_10	Pdzrn4	24.9012
Module_10	Pex5l	19.853
Module_10	Pfkfb1	2.43932
Module_10	Phka2	16.5161
Module_10	Phlpp1	1.15025
Module_10	Pknox2	18.9737
Module_10	Plcl1	22.2904
Module_10	Prickle1	35.0389
Module_10	Prickle2	24.9961
Module_10	Prr5l	16.7698
Module_10	Ptprc	1.09661
Module_10	Ptprt	31.3314
Module_10	Qrfpr	1.94704
Module_10	Ralgapa2	37.5549
Module_10	Rbfox1	26.7246
Module_10	Rgs6	44.954
Module_10	Rhobtb1	31.5512
Module_10	Rora	29.7719
Module_10	RP23-192C21.1	11.7127
Module_10	RP23-411B7.2	40.8156
Module_10	RP23-411B7.5	19.9049
Module_10	RP23-49H16.1	6.44702
Module_10	RP23-85G19.2	8.44776
Module_10	RP24-245M20.2	27.5794
Module_10	RP24-297H17.3	20.3507
Module_10	Rsph10b	33.6918
Module_10	Rsu1	23.0667
Module_10	Runx2	38.6645
Module_10	Ryr2	31.6458
Module_10	Sdk1	42.3526
Module_10	Sec24a	21.8766
Module_10	Setbp1	32.6598
Module_10	Sh3d19	31.8324
Module_10	Sh3gl2	36.8937
Module_10	Sh3rf3	16.8628
Module_10	Shisa6	14.0511
Module_10	Slc16a10	33.4879
Module_10	Slc24a3	17.0031
Module_10	Slc9a7	20.0071
Module_10	Slco1c1	5.78326
Module_10	Slfn8	1.12337
Module_10	Smurf2	14.8935
Module_10	Smyd3	29.737
Module_10	Sobp	40.8302
Module_10	Spock1	26.2646
Module_10	Ssh2	35.759
Module_10	Tcf4	35.7313
Module_10	Tcp11l1	1.17456
Module_10	Tcte2	43.7501
Module_10	Tdrd5	0.298946
Module_10	Tjp1	37.6645
Module_10	Tmem108	44.3409
Module_10	Tmem132d	29.2239
Module_10	Tmem178b	33.6105
Module_10	Tmem241	30.3501
Module_10	Tmem29	18.9375
Module_10	Tmtc2	26.0131
Module_10	Tnnc1	1.42818
Module_10	Tnni3k	10.6047
Module_10	Tox3	25.523
Module_10	Traf5	4.49844
Module_10	Trpc3	3.24349
Module_10	Tspan5	20.3995
Module_10	Ttc17	3.7967
Module_10	Ttc37	1.87834
Module_10	Wbscr17	11.0763
Module_10	Wdr7	2.56951
Module_10	Zfp607	1.25596
Module_11	Aida	39.7097
Module_11	Aldh6a1	15.8675
Module_11	Alkbh8	39.8707
Module_11	Ankmy2	9.17117
Module_11	Ankrd49	36.1942
Module_11	Arl4a	17.3656
Module_11	Atl1	15.5033
Module_11	Baalc	19.5274
Module_11	Bag4	34.6026
Module_11	Bcap29	21.8238
Module_11	Bivm	26.945
Module_11	Borcs7	33.3328
Module_11	Btf3l4	27.7449
Module_11	Capza2	39.4563
Module_11	Ccne2	28.3956
Module_11	Chd3os	17.0451
Module_11	Cpox	23.9022
Module_11	Csde1	25.8831
Module_11	Cstf2	9.95579
Module_11	Cwc15	16.7449
Module_11	Cycs	21.9517
Module_11	Cyp2j6	29.3571
Module_11	Dach2	10.6064
Module_11	Ddx3y	22.5683
Module_11	Dgke	6.82743
Module_11	Dnajb14	27.8534
Module_11	Dram2	37.7143
Module_11	Eif2a	40.7586
Module_11	Eif3e	37.292
Module_11	Eloc	11.0797
Module_11	Enkur	4.31629
Module_11	Eny2	30.6643
Module_11	Fam103a1	38.2927
Module_11	Fam175a	20.1228
Module_11	Fam179b	26.0484
Module_11	Fgfr1op2	4.19524
Module_11	Fundc2	36.3366
Module_11	Gatc	17.8723
Module_11	Gorab	28.7436
Module_11	Gpbp1	33.488
Module_11	Gpr135	15.5547
Module_11	Hspb6	12.774
Module_11	Hyls1	7.86125
Module_11	Ica1l	7.43975
Module_11	Ing2	12.3643
Module_11	Insig1	20.2244
Module_11	Kctd12b	12.1753
[truncated: 11,124 more rows]

## Sheet: Module Genes
Module 01	Module 02	Module 03	Module 04	Module 05	Module 06	Module 07	Module 08	Module 09	Module 10	Module 11	Module 12	Module 13	Module 14	Module 15	Module 16	Module 17	Module 18	Module 19	Module 20	Module 21	Module 22	Module 23	Module 24	Module 25	Module 26	Module 27	Module 28	Module 29	Module 30	Module 31	Module 32	Module 33	Module 34	Module 35	Module 36	Module 37	Module 38	Module 39	Module 40	Module 41	Module 42	Module 43	Module 44	Module 45	Module 46	Module 47	Module 48	Module 49	Module 50
Adam33	9930111J21Rik2	AC102628.1	AC090443.3	3110021N24Rik	Abhd17b	AC139063.2	2900055J20Rik	AC099860.1	Acaca	Aida	Aasdhppt	1810055G02Rik	Aatf	AC074335.4	Abca6	Abca17	Abcg2	Aaed1	AC103620.3	9130011E15Rik	Acsl5	Aamdc	Acat2	AC132242.1	Abhd3	Acbd3	Acot13	Aimp1	2510009E07Rik	Abhd15	Abhd13	AC167815.1	Abhd2	Acat3	Abca8a	AC122423.2	Acadl	Aak1	AC164703.3	2410015M20Rik	AC153919.1	Abca1	2810403A07Rik	Abhd17a	Abhd6	Aacs	9930104L06Rik	AC124550.3	3110082I17Rik
Adcy2	Abca8b	AC162689.1	Acer3	8030462N17Rik	Arhgap21	Acot9	Abca5	Acsl3	Adamts18	Aldh6a1	AC101869.3	Abcc8	Ablim1	AC163993.2	AC114558.6	Abcb4	Acap2	Abi2	Acbd6	Acvr1	Afap1l1	Abcb1a	Alox8	AC159266.3	Abi1	Aftph	Aif1	Akr1b10	2700062C07Rik	AC074312.5	Acp1	Ago4	AC102506.1	Acss3	Abcd3	AC163329.3	Acot6	Abcc4	Acad8	AC141209.3	AC161207.1	AC155158.1	Abhd10	Abhd8	Ackr3	Abca7	A2m	Acads	Abcc1
Adk	AC103635.1	Acyp2	Adam22	Abcb7	Atad1	Akap11	Abcb1b	Agfg1	Adgrl2	Alkbh8	Akap5	AC131992.1	AC130827.2	Acr	AC131791.1	Abi3bp	Add3	AC114920.2	Adss	Aff3	Akap12	AC092855.1	Ap1ar	Adgrf4	AC109152.2	Anp32e	Ak6	Ankle2	Adam32	Actr10	Adora2b	Alk	Adamts8	Adam9	Ablim3	Adrb1	Acyp1	AC157667.1	Angel1	AC161792.1	Acad11	Adamtsl3	Abhd17c	AC123684.1	Adam17	Abr	A4galt	Acvr2b	Abcc5
Aldob	AC116718.1	Adcy8	Adcy10	Abcd2	Brd7	Ankef1	AC123679.2	Ankrd26	Aig1	Ankmy2	Ap5m1	Ace2	AC158971.1	Acvr1c	AC152164.2	Actr3b	Alpk1	Adam21	Akr1c14	Ambra1	Aldh1a1	Acss2	Ap1s2	Atp6ap1l	AC136513.6	Armcx1	Akr1e1	Ankub1	Adcyap1	Actr3	Akirin2	Apcdd1	Ap1m2	Adamtsl2	AC168051.1	Ankrd24	Adprm	AC166332.1	Ap3m2	Acta1	Accs	Ahctf1	Abhd5	AC132303.1	Adamts9	AC127333.1	Aaas	Agbl5	Abcd4
Anapc10	AC129337.1	Agbl1	Adgrb3	Abce1	Cdkn2aip	Anp32a	Adamts20	Arl13b	Ak5	Ankrd49	Arcn1	Agtpbp1	Adamts17	Adamts16	Anp32b	Adamts6	Ap4e1	Aga	Amn	Ank3	Atp1b3	Adamts12	Ascl1	Atp6v1g2	AC160535.1	Art3	Arsg	Anxa4	Ahi1	Anapc7	Atp6v1a	Arg2	Apol8	Adgra3	Acsl1	Ap4s1	Agt	Adcy9	Apln	Akr1b3	Adamts1	Aifm1	AC110508.1	AC157774.6	Adck4	AC139867.2	Aagab	Agtrap	Abl1
Ank2	AC157555.1	Agmo	Adgrg6	AC117750.1	Cmpk1	Arhgef9	Ago3	Bmi1	Amph	Arl4a	Asb13	Ak8	Apba1	Adamtsl1	Ap1s3	Agbl3	Aqp4	Amn1	B3gnt9	Ankfn1	Atp7a	Akap8	Atp1b1	B4galt6	Adgre1	Bet1	Asns	Apobec1	Alcam	Anxa7	Azin1	Arhgap44	Arhgap35	Atp5h	Adamts19	Atp7b	Alg11	Adra1b	Arhgap30	Anapc13	Adamts3	Akap13	AC129188.1	Actl6a	Adrb2	AC166328.1	Aars	Amigo2	Abl2
Ankrd42	Adam18	Ano4	Adgrl4	AC121113.1	Col4a3bp	Arl6	Agps	Bnip3	Ankrd44	Atl1	Avl9	Akr1c18	Apba2	Adarb2	Bmpr1b	Akap9	Atf7ip	Ankrd13c	Bag2	Ankrd11	Camk2g	Aox3	Atpif1	Bean1	AL365322.1	Bhlhe22	B3galnt1	Arhgef3	Ano5	Arl1	Bbs4	Cacna1e	Arl5c	Birc3	Adamts5	Atxn10	Alyref2	Afap1l2	Arl6ip5	Ap2m1	Agl	Alas2	Acadm	Actr6	Ak4	Acrbp	Abca9	Arhgef28	Abtb2
Arid4a	Adam23	Apbb1ip	Aff2	Acadsb	Ctdspl2	Arpp19	Akap10	Cab39l	Arl15	Baalc	Cacybp	Alg14	Apbb2	Adgrf2	C1galt1	Amy1	Atp13a3	Appbp2	Basp1	Ano10	Catsperz	Ap3b1	Calb1	Ccdc17	Ankra2	C1qbp	Bcorl1	Arl5b	Aph1c	Arl16	Bcas1	Cacna2d3	Arnt2	Bub1b	Aebp2	Bbc3	Armcx2	Ahnak2	Arl8a	App	Agpat9	Aldh1a2	Acd	Akt1s1	Ankrd27	Actn1	Abcc3	Arx	Acad10
Arid4b	Adgrl3	Apc	Agbl4	Acbd5	Cul1	Asah2	Arfgap3	Calcrl	Atad5	Bag4	Ccdc160	Anxa5	Armc2	Adra1a	Ccdc113	Asb11	B3galnt2	Arhgap29	Capza1	Antxr1	Ccdc136	Appl2	Cct2	Ccdc80	Ap3m1	Cacul1	Bhlhe41	Arrdc3	Aqr	Arl4c	Bloc1s6	Cacnb2	Atp13a4	Bud13	Aim1	Bmp2	Arsj	Aifm3	Armcx3	Arhgef15	Ankrd55	Angpt2	Acot5	Alkbh6	Ankrd33b	Actn4	Abcc9	Bcl7a	Acan
Armc8	Agk	Arpp21	Akap17b	Acsl4	Dclre1a	Atrn	Arih1	Capn7	Atp13a5	Bcap29	Ccser2	Arid5b	Arnt	Angpt1	Ccdc79	Asb3	Bbx	Arl6ip6	Ccp110	Apex2	Ccl27a	Arhgap25	Cd53	Cfap61	Aph1b	Ccdc181	Bid	Aste1	Arhgef33	Arl5a	Cby1	Cdh13	Atp1a1	Bud31	Aim2	Bola1	Bambi	Arhgap17	Bckdk	Arpc3	Ano2	Ankrd16	Actr2	Amacr	Arc	Acvrl1	Abcf1	Brpf3	Acta2
Arntl2	Alg6	arsb	Akap6	Acvr2a	Ddx26b	B3galt2	Ash1l	Cast	Bach2	Bivm	Cdh19	Barx2	Asxl1	Ankrd29	Cdkl3	B2m	Bms1	Bbs5	Cdkn1c	Arhgap10	Ccr5	Asap2	Cdc123	Cfap65	Apip	Cyp4v3	C1galt1c1	Bche	Asb18	Armc1	Ccdc32	Cfap74	Atp5k	Cald1	Akain1	Borcs5	Bbs10	Arhgap24	Blvra	Atp2a2	Arhgap36	Anpep	Adal	Ankrd9	Ccdc8	Adam12	Abcf3	Casp6	Adam19
Asap1	Ankrd12	Asb5	Akap7	Adam10	Dync2h1	Bcas2	Asxl2	Ccny	Cacng3	Borcs7	Cfap97	Brd9	Atm	Anks1b	Cenpq	B3gat2	Btbd7	Bbs7	Cep78	Arhgef37	Cdkl1	Asb7	Ceacam1	Cfap70	Arhgap12	Dcun1d3	Cacna2d4	Camk2n1	Bard1	Arpc5l	Ccni	Clasp1	Bin2	Ccr9	Alkbh3	Borcs6	Bcdin3d	Arhgap26	Cdk16	Atp6ap1	Arhgap6	Anxa1	Aen	Ap2s1	Ccnd2	Adar	Abhd14a	Ccdc157	Adamts10
Atf6	Ano3	Asxl3	Akt3	Ahr	Efr3a	Brcc3	Atad2b	Cnot11	Camkmt	Btf3l4	Clcn4	Cap2	Atxn7	Apool	Dcaf12l2	Ccdc138	C1ra	Bckdhb	Chrna5	Arid1b	Chka	Atg5	Cfap20	Ciz1	Azi2	Dnajb4	Calm2	Ccdc71l	Bend7	Atp5c1	Cd3eap	Clmp	Btla	Cds1	Antxr2	C1qtnf4	C1ql3	Arhgef12	Cdv3	Bag1	Asb16	Apobec3	Agpat5	Apba3	Col5a1	Adck1	Abhd14b	Ccdc40	Adamts2
Atg4c	Arhgap32	B3galt1	Ammecr1	Alg13	Emb	Btbd8	Bnip2	Cpq	Car5b	Capza2	Cnbp	Ccdc65	B3glct	Arid2	Dcaf17	Ccdc15	Ccdc141	Brox	Cisd2	Arntl	Coro2a	Aven	Col14a1	Clec18a	Bbip1	Emx2	Car2	Cd44	Bloc1s5	Atp6v1h	Cdc42	Colgalt2	Cfap46	Cebpb	Aplf	Calm1	C2cd2	Arid3b	Ciao1	Bloc1s1	Baiap3	Arhgap28	Ajuba	Arl6ip4	Ddx19b	Adcy4	Ablim2	Cdh23	Adgra2
Atp8a1	Armc4	Bbs9	Ankrd17	Alms1	Exoc2	Catip	Bora	Creb1	Clstn2	Ccne2	Crebrf	Cckbr	Baz2b	Atg10	Dnajb9	Ccdc18	Ccdc58	Bzw1	Cog3	Asic2	Crispld1	B4galnt3	Crb1	Col15a1	Bnip3l	Ephx4	Ccdc25	Cebpg	Btg3	Atpaf1	Ciart	Crebbp	Clip3	Cep120	Arhgap22	Ccdc14	Casc1	Atg7	Cox7c	Btf3	C3ar1	Arhgef5	Akirin1	Arpc5	Deaf1	Adcy5	AC102096.1	Col25a1	Adrbk2
Atrnl1	Bank1	Bre	Ankrd34c	Ankhd1	Exoc5	Ccdc112	Caap1	Creg2	Clybl	Chd3os	Cul2	Cd200r1	Bmx	Atp9b	Eaf2	Ccdc90b	Cdk19	Cab39	Crebzf	Astn1	Dkkl1	Bcl2	Crbn	Col6a4	Brix1	Exosc1	Cd302	Cep76	Casp7	C1d	Cops3	Dcp1b	Cplx3	Cnih3	Arhgef6	Ccdc85b	Ccdc59	Atp2b2	Cryab	Cables2	Cat	Atf1	Aktip	Atp5f1	Dffb	Adcy7	AC124566.2	Cpsf4	Afap1
Bbof1	Bmper	Cd2ap	Arap2	Ankib1	Fam199x	Ccdc186	Cage1	Cse1l	Cobl	Cpox	Dhx36	Cd6	Boc	Baiap2l2	Edn1	Cd59b	Cdon	Cbfb	Csgalnact2	Atp6v0a4	Dtx4	Bicc1	Cyp51	Cyp2r1	Ccdc115	Fam213a	Cd55	Chdh	Casq2	Caml	Cutc	Dmc1	Daglb	Coch	Atl3	Ccdc96	Ccdc77	B3gntl1	Csnk2b	Cand1	Cend1	Atoh8	Alg10b	Atp5j	Diexf	Adgrb1	AC125061.1	Ctnnbip1	Agpat4
Blm	C7	Cdh20	Arfgef3	Ankrd28	Gls	Ccdc47	Car8	Cul5	Commd10	Csde1	Eapp	Cdkl4	Btbd9	Capn6	Ednrb	Cenpe	Cdyl	Cbwd1	Dbndd2	Atp8a2	Edn3	Bmp2k	Dach1	Ecm2	Cfl2	Fbxo9	Cdr2	Chmp3	Cbr4	Ccdc126	Dbr1	Dsg2	Dnah12	Copz2	Blmh	Cck	Ccpg1os	Baz1a	Cyb5a	Ccnb1	Chchd5	Atp10a	Alg5	B3galt6	Dnmt3b	Agap1	AC126938.1	Cyp4f16	Ahcyl2
Brdt	Casp12	Celf2	Arhgap15	Ap3s1	Gpcpd1	Ccdc82	Carnmt1	Ddit4l	Cpne9	Cstf2	Eif2s2	Cdnf	Cadm1	Catsper2	Eogt	Cenpk	Cecr2	Cd9	Dnajc19	Atxn1	Egfl6	Bmp5	Diras2	Fam177a	Chordc1	Folh1	Chmp2a	Clcn3	Ccdc62	Cdc16	Ddt	Dysf	Egr1	Cp	Cacng5	Ccnb1ip1	Cd200	Baz1b	Ddx21	Cd4	Cmtm5	Atxn3	Alkbh1	Bfsp2	Dusp1	Agrn	AC162528.2	Cystm1	AI846148
Cacnb4	Cav2	Chrna7	Arhgap20	Apoo	Hmgb1	Cdh7	Casp3	Echdc1	Ctnnd2	Cwc15	Eif4e	Cers4	Camk1d	Cd86	Epb41l5	Cep112	Cep44	Cdc37l1	Fam114a1	Atxn2	Endou	Brinp2	Dnah7b	Fbxo36	Cldn12	Gid8	Chrna4	Cpsf2	Cfap54	Cdkn2aipnl	Dimt1	Eif2ak4	Eif4ebp1	Ctnna1	Calb2	Cd37	Cd274	Baz2a	Decr1	Chil1	Cnr1	Bach1	Anapc4	Bloc1s4	Dusp18	Agrp	AC165086.3	Ddah2	Ajap1
Cadps	Ccar1	Chsy3	Arhgap42	Appl1	Hook3	Cdk11b	Ccl28	Eps15	Daam1	Cycs	Eif5	Chn1	Ccbe1	Cenpp	Fam228b	Clec5a	Cep95	Cdkl2	Fam26e	Atxn7l1	Fam118b	Btbd11	Efcab1	Fkbp7	Commd8	Gjd2	Cltc	Csnk2a1	Cftr	Cep19	Eif2s1	Ermard	Eif4enif1	Ddhd2	Camk2d	Chchd7	Cd33	Bcl9	Decr2	Chrm4	Cstad	Bcl2l11	Angel2	Bmyc	Dyrk2	Aldh1l1	Acadvl	Ddx27	Ak2
Car10	Ccdc122	Clvs1	Asph	Ar	Ipo11	Cenpc1	Ccnyl1	Fam169a	Dcdc2c	Cyp2j6	Eif5a2	Clec2d	Cdk8	Cep128	Fem1c	Cnbd2	Cfdp1	Cept1	Fam73a	Auts2	Fam129a	C1qtnf7	Efcab10	Foxq1	Creg1	Glrx	Ctxn1	Ctcf	Dgkb	Cgrrf1	Fads2	Fam71d	Entpd4	Ddx42	Cbfa2t2	Cidea	Cd47	Bhlhe40	Dhdh	Cndp2	Cx3cr1	Bcl7c	Ankrd45	Bok	E2f6	Aldh7a1	Ace	Dennd2a	Akap8l
Cblb	Ccdc148	Cpne8	Aspn	Arfgef1	Iws1	Cep126	Cdh2	Fam171b	Ddb2	Dach2	Ermn	Col8a1	Cemip	Chrm2	Fgf10	Cntnap3	Chic2	Cetn2	Fezf2	Bcas3	Fam13b	Car4	Efcab14	Gar1	Cript	Glyr1	Cyfip2	Ctsk	Dmtf1	Chmp2b	Fam175b	Fancc	Fdps	Dusp6	Cbx3	Cideb	Cep57	Bicdl1	Dmrtc1a	Cops6	Cyb5rl	Bgn	Anxa3	Bsg	Erbb3	Ampd3	Acin1	Dhodh	Ammecr1l
Cc2d2a	Ccdc34	Cracr2a	Astn2	Arglu1	Klhl15	Cfap206	Cdk14	Fam208b	Dennd1a	Ddx3y	Exoc3	Ctps2	Cers6	Cntnap4	Gabra5	Cntnap5c	Clint1	Cggbp1	Fgf20	Bcl11a	Fhl2	Casp8	Eif3m	Gas2l3	Dctn4	Gmps	Cyp2j12	Ctsl	Dsel	Clec14a	Fkrp	Fndc3b	Fn3krp	Eef2k	Cd24a	Clpx	Cep72	Brwd1	Dsn1	Cox7a2	Dchs2	Blnk	Api5	Bzw2	Ercc6	Ank1	Acox3	Dhtkd1	Ankfy1
Ccdc85a	Cd180	Csmd1	Atad2	Arhgap11a	Krt12	CH25-588N10.2	Cfap69	Fam217b	Diaph3	Dgke	Fam49a	Dnajc6	Chd2	Col11a1	Gcfc2	Cox7b2	Clk1	Chac2	Flt3	Bptf	Frk	Cav1	Enpp5	Gatad2b	Dhx15	Gnl3l	Dctn5	Dcn	Dsg1c	Cln5	Golph3	Foxp1	Gabarapl1	Fbxo27	Cd38	Coa6	Cirbp	Btaf1	Dync1li2	Cox7b	Dgkk	Bmp1	Apmap	Card19	Exd2	Ankrd52	Acp6	Dnase2a	Ankrd10
Cdk12	Cdh8	Ctnna2	Atg4a	Arhgap5	Larp4	Cul4b	Cir1	Fbxw2	Dnah5	Dnajb14	Fbxo33	Dpp4	Chd9	Cpne4	Hibch	Creb5	Clk4	Clasp2	Hapln4	Brd4	Ggnbp2	Ccdc3	Fam206a	Gnl3	Dtl	Hnrnpa3	Dnah6	Dnaja2	Dusp16	Cops4	Golph3l	Fus	Gpatch4	Fxyd5	Cdc14a	Dleu7	Clgn	Btrc	Eef2kmt	Cptp	Dlk1	Bmp4	Apold1	Ccbl2	Faah	Anks6	Acsf2	Dusp11	Anks1
Cep162	Cdh9	Dcx	Atp10b	Arl8b	Map2k4	Ddx1	Cnep1r1	Frrs1l	Dnajc1	Dram2	Fkbp3	Epha4	Cmss1	Csgalnact1	Hist2h2ab	Ctbs	Cmc1	Cnot6	Ift80	C2cd5	Gls2	Ccnt2	Fancb	Gripap1	Eri2	Htr5a	Dnajc7	Dnajc28	Elmo1	Coq10b	Gpbp1l1	Gria1	Gpkow	Fzd6	Cdca7	Dusp12	Coq3	Cacng2	Eif4b	Cry1	Dnah1	Bmp6	Apopt1	Ccdc171	Fam46c	Ano1	Acsl6	Efs	Ano6
Cep192	Cetn4	Dlg2	Atp11b	Asah1	Mest	Dek	Cnot2	Frzb	Dock4	Eif2a	Fzd3	Erich6	Cntrl	Dgki	Hs3st1	Cxxc4	Cyb5r4	Cnot7	Il12a	Cacna1a	Gxylt1	Cgnl1	Fdft1	Gsta3	Erlin1	Iigp1	E2f1	Dync2li1	Fam122b	Dbf4	Gpr85	Grk5	Gzmk	Gadd45a	Cdhr1	Dusp28	Cpne3	Ccdc57	Elac1	Ctss	Dock11	Bnc2	Aqp11	Ccdc177	Gcnt2	Anxa11	Acvr1b	Emid1	Apitd1
Chd6	Cml3	Dlgap1	Atp5s	Ascc3	Morc2b	Denr	Cpsf6	Gbp7	Dscam	Eif3e	Gclc	Fam98a	Col26a1	Dis3l2	Htr1a	Cyp2j8	Dcaf13	Cpd	Kcnk4	Cacna1b	Htatip2	Chek2	Gatm	Gstcd	Fam126b	Ilf2	Egr2	Edem1	Fam184b	Degs1	Gtf2h5	Hhat	H2-M3	Gdf11	Cdhr3	Efcab8	Ctnnd1	Cchcr1	Extl2	Cyld	Drd3	Bpifa2	Arhgef26	Ccdc84	Glt1d1	Aox1	Adam8	Fam163a	Arap1
Cnrip1	Cntn3	Dnm3	Atp8b1	Aspa	Naa15	Dkc1	Cstf3	Gigyf2	Dst	Eloc	Gemin8	Faxc	Cpeb1	Dtd1	Htr2a	Dcc	Ddx50	Dars	Kcns1	Cacna1c	Ick	Chfr	Gpr26	Gucy2g	Fam174a	Kcnj16	Eif2s3x	Elf2	Fam19a4	Dnajc10	Hdhd2	Hipk2	Hcls1	Gdpd3	Celf1	Emc6	Cyp20a1	Ccl25	Fah	Dctd	Ehhadh	Cabp1	Arl10	Cdc42se2	Gpr35	Ap1g2	Adamtsl4	Fkbp10	Arhgap39
Cobll1	Cntnap5b	Dock3	Atrx	Atf2	Nbeal1	Dnajc2	Cwh43	Gkn3	Ebf1	Enkur	Hrsp12	Gabbr2	Desi2	Dync1i1	Il18	Dkk2	Dtx3l	Dcbld2	Lipt1	Cacna1d	Jak1	Chuk	Gstz1	Hsd17b11	Fam45a	Kcnk6	Enpep	Fbxo17	Fbn1	Dtd2	Hgsnat	Hmbox1	Hmgb2	Gen1	Cenpu	Emx1	Cyp2j9	Cd59a	Fam131b	Dennd5a	Etfdh	Casp2	Arpc2	Cfap43	Hba-a1	Ap3b2	Adap2	Fndc1	Arhgef1
Csnk1g1	Csmd3	Dtwd2	Bace2	Atg3	Ngly1	Dram1	Cyp39a1	Gng2	Egfr	Eny2	Idi1	Glp2r	Dnajc24	Ecscr	Ireb2	Dock10	Dzip1	Dck	Mapk6	Camta1	Kazald1	Cmya5	Gtf3c6	Id2	Fam8a1	Kitl	Eya3	Fbxo32	Fbxl21	Dtwd1	Idh3a	Insc	Hspa12a	Ggta1	Cep135	Epdr1	Dclre1b	Cdc14b	Fbxo5	Eif3c	Exosc9	Ccdc117	Arrdc4	Chchd4	Hbb-bs	Apeh	Adck2	Foxj1	Arid1a
Cspp1	Cttnbp2	Eda	Bdp1	Atp11c	Nrn1	Dynlrb1	Dcaf10	Havcr2	Elovl7	Fam103a1	Igbp1	Gng3	Efl1	Efcab5	Ispd	Dph6	Efemp1	Dcun1d5	Med7	Ccdc191	Kdm2a	Col12a1	Hcrtr2	Ifit1bl1	Farsb	Klhl20	Fabp3	Fbxo45	Fhl4	Efhd1	Laptm4a	Ly75	Huwe1	Gjc1	Chek1	Exosc3	Ddx52	Cdk5rap2	Fgf1	Eif3j2	Fam71e1	Ccnt1	Arsk	Chkb	Hbs1l	Arf3	Adcy1	Ftl1	Armc9
Ctnnal1	D3Ertd751e	Epha5	Bicd1	Atp2b1	Pcnp	Elmod1	Dclre1c	Hdac2	Erc2	Fam175a	Ik	Gpr1	Eif4g3	Egf	Kif20b	Efcab7	Eif2b3	Ddx5	Mfsd7b	Ccdc30	Krt80	Col22a1	Hipk3	Kcnk9	Foxn2	Map4	Fabp5	Fermt2	Filip1	Eif1b	Lrrc75a	Mcu	Il10rb	Glt8d2	Chst9	Fam43a	Ddx59	Cdyl2	Ftsj1	Fahd1	Fank1	Cd63	Arxes2	Chrac1	Ifitm1	Arhgap19	Adcy6	G3bp1	Asap3
Cyyr1	Ddx4	Epha6	Birc6	Atp6v1d	Phf3	Enpp6	Ddhd1	Hnrnph2	Erg	Fam179b	Irak1bp1	Hcfc2	Elovl6	Eml5	Lca5	Egfem1	Elf1	Dhfr	Mpc1	Cda	Lamc2	Csnk2a2	Hsbp1	Kcnu1	Fundc1	Mrpl48	Fam50a	Gnai3	Flrt3	Eif4a2	March5	Mettl8	Il1rl2	Golga3	Cpa6	Fancd2	Dus4l	Cenpj	Fuca2	Fam96a	Fcgr1	Cdadc1	As3mt	Cisd1	Katna1	Arhgap31	Adcyap1r1	Glrx5	Ascc2
Dgkh	Diaph2	Erap1	Bmp3	Atr	Plaa	Epc2	Ddx46	Ifit2	Etv6	Fgfr1op2	Itfg1	Hkdc1	Eml4	Eml6	Lmo3	Erich3	Epb41l2	Dnajc15	Mtmr1	Cdk6	Layn	Cux2	Htr2c	Kif6	Fyttd1	Mrps18b	Fopnl	Gsr	Foxp2	Elovl4	Mfap1b	Mkl2	Kcng3	Gpr68	Crhbp	Fbxl15	Eno3	Cep152	Gbp5	Frrs1	Fgf2	Cdc26	Asf1a	Cited4	Klhl25	Arhgef7	Add1	Gpc3	Aspg
Dlc1	Dnah7c	Etl4	Bmpr2	Bclaf1	Pmaip1	Fam92a	Dennd1b	Il15	Ewsr1	Fundc2	Katnbl1	Hsd11b1	Epb41	Enox2	Lrrc55	Fam229b	Erich1	Dnal1	Mycbp	Cdkal1	Lnx1	Cyth3	Ido1	Kif9	Ggct	Mtfr1	Fos	Gtf2a2	Frmpd3	Emc4	Mpv17l2	Mthfs	Kcnj9	Hectd1	Ddx60	Fez2	Fam101b	Cep250	Gla	G6pdx	Fh1	Cdh1	Atg12	Ckb	Klhl42	Ascc1	Add2	Gprc5b	Atg16l2
Efcab2	Dok6	Exoc4	Bod1l	Bend6	Pou3f2	Glra3	Dennd4c	Itch	Exoc6b	Gatc	Kbtbd8	Kcna2	Fgf5	Epha3	Lrrn1	Fam98b	Etnk1	Dpp8	N6amt1	Cep57l1	Maf	Dab2	Ift52	Mdc1	Glce	Naalad2	Fxyd7	Heca	Gabrg1	Emc7	Mrpl42	Mthfsl	Kif1b	Hlf	Dlx1	Fkbp1b	Frat2	Cldn14	Glb1	Gapdh	Fpgt	Cdk7	Atl2	Cldn10	Lonrf1	Asphd1	Adgre5	Grb2	Auh
Efna5	Dpyd	Fbxo8	Brca2	Blzf1	Psmd14	Gpr22	Dennd6a	Kdelc2	Ext1	Gorab	Magoh	Kcns3	Fmnl2	Esrrg	Lrrn3	Fat3	Exoc1	Dpy19l4	Nup160	Chchd3	Masp1	Dcaf5	Jrkl	Mdh1b	Gnb4	Nucks1	Gfra4	Hnrnph1	Gatb	Epm2aip1	Mrps2	Ncam1	Kif22	Hps3	Dlx2	Fxyd2	Galnt12	Clec16a	Glod4	Gba	Frmpd2	Cep97	Atp6v1c1	Cldn5	Lrig2	Atg2a	Adi1	H2-Q4	Axin2
Ehbp1	Efhc2	Fer	Brinp1	Bmpr1a	Qk	Gpr34	Dync1i2	Kifap3	Fam155a	Gpbp1	Manea	Lrrc4	Frmd6	Fancl	Lyrm1	Gabra2	Fam46a	Dr1	Plgrkt	Chchd6	Mib1	Dcp1a	Kcnab1	Muc3a	Gpalpp1	Nup153	Gnas	Jtb	Gpc4	Etaa1	Mtap	Ncoa2	Lag3	Irf2bp2	Dnah11	G0s2	Ganc	Clip1	Gpatch1	Ggact	Gabrq	Cers5	Bex4	Clns1a	Map2k3	Atp13a1	Adipor2	H2afy2	B4galt1
Elavl2	Etohi1	Fgf12	Brinp3	Braf	Rala	Grsf1	Edem3	Kpna4	Fam189a1	Gpr135	Maob	Lsp1	Galnt7	Farp2	Meig1	Gabrg3	Fgfr1op	Dstn	Ppil6	Clcn1	Msh2	Deptor	Kctd4	Nifk	Gtf2b	Phyh	Gpr183	Kcng4	Gpr149	Etf1	Mtmr6	Npcd	Lasp1	Kcnab3	Doc2g	Galc	Gbp2	Cnot1	Gpr62	Gsta4	Gad2	Cfh	Birc2	Clta	Mettl6	Atp1b2	Adora1	Haus4	Bag3
Emcn	Fam120c	Fhit	CAAA01180111.1	Brwd3	Rbm3	Hif1a	Ero1lb	Krit1	Fam193a	Hspb6	Mmachc	Luzp1	Gnaq	Fbxo16	Mettl25	Galnt13	Gabpa	Eif1a	Ppp1r3d	Clcn5	Nfxl1	Edrf1	Lap3	Nmi	Hsd17b7	Pigz	Gstp2	Kctd6	Gpr173	Fam84b	Naa50	Nr3c2	Lias	Lats1	Dock2	Gdap2	Gimap6	Coro6	Habp4	Gstm5	Gnal	Cfp	Bola3	Cog8	Mmp2	Atp5e	Adpgk	Hcn4	Bin3
Enpp2	Fam198b	Fmn2	Cacna2d1	Btbd1	Rnf2	Hnrnpdl	Etfa	Lix1	Fbxo34	Hyls1	Mospd2	Mamdc2	Gng12	Fchsd2	Mid2	Gfpt2	Gbp3	Eif1ax	Pura	Cnnm2	Ntn5	Egflam	Lxn	Nsun6	Hsf2	Pnrc1	Gtf2f1	Klhl24	Gprin3	Fastkd2	Ndufs5	Phactr3	Lrig3	Lifr	Dpp6	Gde1	Gjc3	Cox10	Hbld2	Gstp1	Gngt2	CH36-200G6.4	Brd2	Col9a3	Mrps27	Bbs1	Aebp1	Hif3a	Brd8
Epb41l3	Fbxl4	Frmd3	Cadm2	Btbd10	RP24-353D23.1	Hpgd	Exoc6	Mier1	Frmd4a	Ica1l	Nckap1	Map3k5	Grb14	Fgf13	Mms22l	Gldn	Gfm2	Eif3j1	Pyurf	Col24a1	Olfm1	Epc1	Lyar	Nxpe3	Ing3	Pomp	Hirip3	L2hgdh	Gramd1c	Fbxo3	Nedd8	Ppp1r21	Lrrc29	Lum	Drd5	Gna15	Gorasp2	Cox7a1	Hdhd3	Gstt1	Gpr165	Chsy1	Btd	Cox14	Mrps6	Bicd2	Aff1	Hspb8	Bzrap1
Erc1	Gab3	Frmpd4	Cadps2	Camsap2	Sacm1l	Hspa4l	Fam35a	Mkln1	Fstl4	Ing2	Nfyb	March10	Hivep2	Filip1l	Morc4	Glra2	Gpsm2	Ero1l	Rnf39	Cpeb3	Paqr9	Ephb2	Lyrm4	Oxsm	Inpp1	Prkacb	Hist1h4f	Mbd4	Grb10	Fkbp14	Oxnad1	Prdm10	Lst1	Lysmd1	Enah	Gpr150	Gpr12	Cramp1l	Isg20l2	Hspa8	Gtf2e1	Cish	Camk1	Cox18	Nab2	Bsn	Afg3l2	Il13ra1	Cabin1
Erp44	Gca	Gab2	Camk4	Caprin2	Scn7a	Ift20	Fam49b	Mndal	Galnt3	Insig1	Nudcd1	Mfsd6	Igfn1	Focad	Nkx3-1	Grem2	Gtf2f2	Fam117b	RP23-454K24.1	Csmd2	Parva	Ephb3	Mak16	Pabpn1	Kdm5d	Psmd1	Hist1h4h	Mcl1	Gulp1	Glrx3	Paics	Reck	Lynx1	Mitd1	Epb41l4a	Gpr157	Gpr37	Crhr1	Jpt2	Immt	Gyg	Cnksr3	Caprin1	Cox5a	Ncapd2	Cacnb1	Ago1	Il20ra	Cables1
Esyt2	Gpc6	Gabrb3	Cask	Carf	Scyl2	Il33	Fam63b	Msl2	Garnl3	Kctd12b	Nxt2	Mia3	Ikzf1	Fras1	Npr3	Grik2	Gtf3c3	Fam133b	Scyl3	Cux1	Phlpp2	Ets1	Mme	Pigu	Klhl40	Psmd7	Hmgcr	Mrpl50	Hs6st2	Gmfb	Pdzd11	Reln	Lyrm2	Morc2a	Exosc8	Gramd3	Gpx3	Cryl1	Katnal1	Kpnb1	Harbi1	Col13a1	Ccdc120	Cox6a1	Neurl1b	Cacng4	Ahcyl1	Kcnh2	Cachd1
Eya4	Gphn	Galntl6	Ccdc129	Casc4	Slain1	Itgb8	Fndc3a	Myef2	Golgb1	Klf6	Orc3	Mpv17	Iqgap2	Fstl5	Pgap1	Grk4	Hmgn3	Fam149b	Slc35b3	Dab1	Pik3c3	Eya1	Mpp1	Pih1d2	Klhl7	Ptp4a2	Homer1	Napg	Hsp90b1	Gng5	Pfn2	RP23-217J11.1	Maats1	Morc3	Fabp7	Grrp1	Gstt2	Csrp2bp	Kcna1	Krt9	Htr4	Col1a1	Ccdc127	Cox8a	Noxred1	Cacng8	Ahnak	Kctd18	Cars
Fam185a	Gpr137c	Gmds	Ccdc39	Casd1	Slc25a36	Kcnv1	Fsd1l	Myl12b	Gpatch8	Lancl2	Pdzd8	Mta3	Irf2	Ghr	Pigl	Gucy1a3	Hnrnpu	Fam204a	Stradb	Dclk1	Pik3r1	Fam13c	Mvd	Plag1	Letm2	Rbm17	Hrasls	Nceh1	Igf2bp2	Gsto1	Pqbp1	RP23-71J17.1	Map1a	Mtfmt	Fam102b	H2-T24	Gtpbp10	Ctdspl	Kif1bp	Krtcap2	Igsf1	Col23a1	Ccdc166	Crem	P4ha1	Cad	Akna	Khdrbs1	Ccdc134
Fam188a	Gpr158	Greb1l	Ccdc88a	Casp1	Sp3	Kif18a	Fubp1	Napb	Gprasp1	Larp7	Pigk	Myl4	Itga8	Gm47283	Pkdrej	Gucy1b3	Ints8	Fam208a	Trim37	Dhx57	Pitpna	Fam168a	Nap1l3	Pms1	Lsm5	Rfc3	Hsp90ab1	Nfe2l2	Igsf10	H1f0	Prdx1	Runx1t1	Mog	Mtmr3	Fam126a	H2afx	Haus7	Ctif	Knop1	L1cam	Impg1	Col3a1	Ccdc184	Crlf2	Polr3b	Calr	Aldh18a1	Kif7	Ccdc162
Fam19a1	Grid2	Grik1	Ccser1	Casp8ap2	Spata32	Kiz	Fxr1	Ndufb4	Grin2a	Lin9	Pkia	Nell2	Kansl1	Gvin1	Pop4	Hfm1	Itgb1	Fbxl5	Tsen15	Dip2b	Plcxd2	Fam196a	Ndrg3	Rad23b	Lysmd3	RP23-315C11.7	Hspa4	Nom1	Inca1	Hccs	Psenen	Scp2	Mrnip	Mustn1	Fam184a	Hint2	Hcfc1r1	Cyp11a1	Kxd1	Lamtor2	Irs4	Col4a6	Ccdc28a	Csf2ra	Ptpn9	Camk2b	Aldh1l2	Klf3	Ccdc93
Fam19a2	Grm3	Grm8	Cd46	Cbll1	Styx	Klhl4	Gbe1	Nop58	Hdac8	Lrrc40	Pls3	Neo1	Klf7	Hs3st5	Pot1a	Hmgb3	Itgbl1	Fbxo30	Usp45	Dip2c	Plk3	Fbxl20	Neto2	Rad51ap1	Maip1	RP23-336M6.2	Idh3b	Nr1d2	Invs	Hint3	Psmd12	Sh3gl3	Nptxr	Narf	Fam186b	Hist1h1c	Hddc3	Dapk2	Ly6e	Ldhb	Isl1	Colec12	Ccdc43	Cst3	Pxdn	Cbl	Alg8	Lancl3	Ccm2l
Fam69a	Grm5	Hacd1	Cdc42bpa	Ccdc173	Syncrip	Lgi2	Gsk3b	Nudt12	Hrh2	Mad2l1	Prkd3	Nes	L3mbtl1	Igf1	Proca1	Hmgn5	Jak2	G2e3	Vezt	Dlgap2	Plscr2	Fbxl7	Nexn	Rad51b	Mat2b	RP23-438P19.2	Idh3g	Nup35	Kcna4	Hscb	Rab1a	Slc44a5	Nr2e1	Ncald	Fam196b	Hist1h1d	Hebp2	Dcun1d2	Lysmd4	Lmo2	Itih3	Cped1	Ccnl1	Cst6	Rab26	Cc2d1b	Alkbh2	Lgals3bp	Cdca7l
Fbxl17	Gucy1a2	Hdac9	Cdh10	Ccdc174	Tcea1	Lpar6	Gtpbp8	Nudt4	Hs3st2	Mal	Prss12	Nvl	Lef1	Inpp4b	Rad18	Hspb11	Jmy	Gatad1	Vps37a	Dscaml1	Ptpn3	Fbxo28	Nfe2l3	Ralgapb	Mbip	Rpp40	Ints12	Ocln	Kcnj2	Ifnar2	Rab7	Srgap1	Nr4a3	Neurod2	Fbn2	Hist1h1e	Hsdl2	Dennd3	Mapre1	Lsm10	Jcad	Crabp2	Ccz1	Ctu1	Rab3d	Ccdc97	Alox12b	Lima1	Cep104
Fhod3	Hecw2	Hmgcll1	Cdh11	Ccdc50	Tlr3	Mbnl1	Herc4	Nufip2	Hs3st4	Maoa	Psip1	Oscp1	Lhfp	Kcnb2	Rc3h1	Hunk	Kcmf1	Gclm	Wdr19	Dym	Pvalb	Flt1	Nrsn1	Riiad1	Mex3b	Rsph4a	Izumo4	Pacrgl	Kctd8	Ifrd1	Rel	St6galnac5	Palb2	Nr2c2	Fign	Hist1h2ab	Htr3a	Depdc5	Med1	Lsm14b	Kcns2	Csf1	Cd164	Cyp4f13	Rassf5	Cdc42bpb	Als2	Litaf	Cep164
Figf	Hnrnpr	Hs6st3	Cdh12	Ccdc66	Tmem65	Mpp5	Hspb3	Papd5	Hsf5	Mapk1ip1l	Psma4	P2ry14	Lrpprc	Kcnh8	Rfesd	Hykk	Kctd9	Gdi2		Dyrk1a	R3hcc1l	Fnip2	Nsdhl	RP23-198H15.2	Mfsd14b	Set	Kcnj13	Pafah1b1	L3mbtl4	Il17d	Rhov	Stox2	Pcbp2	Nupr1	Fktn	Hist1h2ac	Ids	Dgka	Mfap1a	Mak	Klf11	Cul4a	Cd83	Dact2	Rbms2	Cdh24	Als2cl	Lrrc42	Cep85
Fnbp4	Htatsf1	Htr1f	Cdh18	Ccdc87	Tmtc3	Mthfd2l	Ifih1	Pbrm1	Ift88	Matr3	Rbm48	Pak1	Lrrc3b	Kcnk10	RP23-281E24.2	Ifit1bl2	Kdm5a	Gdpd1		E2f3	Rnf24	Gab1	Olfml1	RP24-166B2.2	Mob4	Slu7	Kcnj8	Parp16	Lca5l	Impact	RP23-183D11.6	Syn3	Pdap1	Oma1	Fmo1	Hist1h2ad	Igfbp5	Dhx9	Morf4l2	Mdh1	Klhl13	Cyp1b1	Cdc25a	Dars2	Recql	Cdh4	Amd1	Magee1	Cfap100
Frem1	Itgb3bp	Immp2l	Cdh6	Ccnc	Trip12	Mut	Ino80	Pik3c2a	Itga1	Mcm8	Rdh11	Palm3	Lrrc49	Klhl1	RP23-306I3.1	Kcnd2	Kin	Ginm1		Eefsec	RP23-357J7.8	Gapvd1	Osbpl8	RP24-168G14.1	Mrpl39	Smim19	Kdr	Pex13	Lrmp	Ipo7	RP23-286I5.3	Tec	Pemt	Pcgf3	Fmo5	Hist1h2ai	Il15ra	Disp1	Mrpl45	Mrpl16	Lcmt2	Cyp27a1	Cdkn1b	Dcaf12l1	Rnf125	Celf4	Amdhd2	Mdm1	Chd4
Frmd5	Kcnq5	Kcnmb2	Cdk13	Ccng1	Ttc21b	Myom3	Ints6	Pikfyve	Itgb3	Med31	Ric3	Pdk4	Lypd6b	Lacc1	RP23-313O9.1	Kdm4d	Larp4b	Gng13		Efcab6	Sarnp	Hacd4	Pcdh19	RP24-219P17.7	Nap1l5	Smyd2	Kidins220	Pgam1	Lrrc69	Isca1	RP23-350C1.3	Tenm4	Phf13	Pcgf6	Frg1	Hist1h2ak	Ino80c	Dock1	Nabp2	Mrps33	Ldlr	Dact1	Cdkn2c	Dhrs7	Rpain	Celsr2	Amer1	Metap1d	Chd7
Gkap1	Lactb	Kctd16	Cdkl5	Ccnh	Tyw5	Mysm1	Kat6a	Pin4	Jazf1	Mllt11	Rnf13	Plxdc1	Lyzl4	Lgr4	RP24-481M4.2	Klhl14	Lepr	Gnpda2		Ehmt1	Scg5	Hbp1	Pdgfa	RP24-491I24.3	Nbn	Spin2c	Kl	Phf6	Man1a	Itm2b	RP23-440D19.2	Tmem189	Pik3cg	Pdcd6ip	Frmd7	Hist1h2bf	Iqck	Dock8	Necap1	Naca	Lemd1	Dbx2	Cebpa	Dlk2	S100a10	Cep131	Amer2	Mmp15	Chst11
Glmn	Lin7a	Klf8	Cep290	Cd34	Ube2w	Nol8	Kdm7a	Plk4	Kalrn	Mr1	RP23-185B14.1	Ppp1r9a	Manba	Lhfpl3	Rp9	Lair1	Lrp6	Gnpnat1		Enox1	Serpinb8	Il1r1	Pdlim2	RP24-553B2.1	Nudt2	Srd5a1	Klk6	Pik3r3	Mas1	Jmjd4	RP23-79E13.7	Tmem266	Plau	Pdk1	Gabpb1	Hist1h2bg	Kcng2	Dock9	Neu3	Ndufa1	Lhfpl5	Ddi2	Cebpd	Dnaic1	Sec11a	Cercam	Amigo1	Mutyh	Cit
Gpr45	Lrguk	Lekr1	Cep70	Cd84	Uevld	Npy1r	Kif2a	Ptbp3	Kcnj6	Msl3	RP23-275N21.1	Prdm8	Map3k3	Lrba	Samsn1	Lcp1	Mbd2	Guf1		Epb41l4b	Sgpp2	Itga6	Phyhipl	Sec16b	Opa1	Sugt1	Kpna2	Pla2r1	Mcm9	Kdelc1	Rpl19	Tspear	Plbd2	Plcd1	Galk2	Hist1h2bj	Lmcd1	Donson	Noxo1	Ndufa2	Lhx8	Ddr2	Cebpz	Doc2a	Serinc2	Chd5	Amt	N4bp2	Cluap1
Hace1	Lrrcc1	Lrrtm3	Cep83	Cdc27	Usp25	Ogfrl1	Lama2	Rab10	Kcnq3	Mtrf1	RP23-67E6.3	Prkcb	Map7	Ltbp1	Sertad2	Lpxn	Mcee	Haus1		Ephb1	Slc22a4	Kcp	Pole3	Senp8	Otud6b	Sult2b1	Lamp5	Ppat	Mettl5	Kif5b	Rpl22	Usp28	Pon3	Ppm1g	Galm	Hist1h2bm	Lpar4	Dopey2	Nsa2	Ndufa3	Lmo7	Ddx55	Churc1	Dohh	Slc16a6	Cherp	Anapc1	Naga	Cmip
Herc1	Lrriq1	Lurap1l	Cep85l	Cdc40	Usp47	Omg	Lin52	Rab28	Khdrbs3	Net1	RP24-84I4.2	Psmb2	Mboat1	Lyplal1	Setdb2	Lrriq3	Medag	Hmgxb4		Fam228a	Slfn5	Kdm1a	Polr2m	Sin3a	Pdcd2	Tarsl2	Leo1	Ppp1cb	Mgst1	Klhdc2	Rpl9-ps6	Vgll4	Ppme1	Prr14l	Garem1	Hist1h3a	Lrp12	Dync1h1	Pfdn2	Ndufa4	Magel2	Dhx33	Cklf	Dph5	Stk10	Chn2	Angptl2	Neil2	Col18a1
Herc3	Lsamp	Luzp2	Chd1	Cdc73	Usp53	Pcsk1	Lnpep	Rbbp6	Kmt2c	Nim1k	Rpl4	Pstpip2	Mboat2	Map3k15	Sgol2a	Map1b	Mier3	Hnrnpa2b1		Fam78b	Sowahb	Kdm3a	Ppp2ca	Slc25a35	Pde12	Tbc1d8b	Lig4	Ppp4r2	Mns1	Klhl9	Rragc	Zcwpw1	Prmt8	Psmd11	Gcnt1	Hist1h3b	Lsm12	Dynlt1c	Pla2g7	Ndufa9	Map10	Dna2	Clec11a	Dusp23	Tbc1d9	Chst1	Angptl4	Nxph4	Col1a2
Hmcn1	Ly86	Macrod2	Chl1	Cdk17	Xpo4	Pdik1l	Lpcat2	Rgs5	Large	Nkiras1	Sfr1	Rabl2	Mcc	Micu2	Slc1a3	Map3k21	Minos1	Hprt		Fars2	Spire1	Klf10	Praf2	Slc38a4	Pex2	Tbccd1	Lrrk2	Proser2	Mpp7	Kpna1	Shcbp1l	Zfat	Prpf6	Pvrl4	Gem	Hist1h3d	Marcks	Ece1	Pmvk	Ndufb9	Mettl4	Dock5	Cltb	Dut	Tcea2	Clcn6	Ank	Patz1	Col27a1
Hs2st1	Malsu1	Mageb18	Chrm3	Cenpw	Ythdf3	Pja2	Lpgat1	Ripk1	Ldb2	Nkrf	Sgpp1	Rad54b	Me1	Mid1	Slc39a6	Mbnl2	Mpp6	Idh1		Fat4	Stim2	Lcp2	Prr36	Slc7a8	Pfn4	Thrap3	Med21	Rab12	Myo3a	Lrp11	Slc9a6	Zfp407	Rax	Rab7b	Gmcl1	Hist1h3e	Mettl14	Ednra	Pola2	Ndufs6	Morn2	Dse	Cmpk2	Dynll1	Thbs1	Clip4	Ankrd35	Pdlim3	Col4a1
Ica1	March1	Malt1	Clvs2	Cep170	Zbtb10	Plp1	Ly96	Rnf146	Ldlrad3	Nol7	Smarca5	Raet1e	Mllt3	Msh3	Stt3a	Mctp1	Mreg	Ikbip		Fli1	Stmn1	Lmln	Rab3c	Spa17	Phf7	Tigd2	Mei1	Rab18	Myo3b	Map6d1	Srd5a3		Rbpms2	Rdh10	Gng4	Hist1h3f	Mettl18	Eml1	Pold3	Nicn1	Mttp	Dusp22	Cnih1	Edf1	Tm6sf2	Clmn	Anks3	Phc1	Col4a2
Igfbp7	Mef2a	Mamld1	Cnksr2	Cep295	Zdhhc21	Ppil4	Map3k2	RP23-118M23.1	Ldlrad4	Npm1	Srek1ip1	Rnf144b	Mphosph9	Myo16	Tex9	Mctp2	Mroh8	Itm2a		Frmd4b	Sypl2	Lpar1	Reep6	Spats1	Pigp	Tmem165	Metap1	Rars	Nbas	Metap2	St13		RP23-103I12.10	Riok1	Golga1	Hist1h3h	Mss51	Eps15l1	Polr2j	Nop10	Ngb	Dusp5	Cnih4	Efhc1	Tmem88	Cnnm3	Ankzf1	Pknox1	Col4a5
Jmjd1c	Mettl24	Mettl15	Cnot4	Cep350	Zfp101	Ppp1r42	Met	RP23-122F3.1	Magi1	Nr2f1	Sri	RP23-114E15.17	Msantd2	Neb	Tfap2d	Mei4	Mterf3	Kat2b		Frs2	Tbc1d30	Lrch3	Rnf219	Srpk3	Postn	Tmem218	Mgst3	Rfc1	Nek10	Mettl20	Tcta		RP23-355G16.6	Rnasel	Gpnmb	Hist1h3i	Mycl	Epsti1	Ppia	Nprl2	Ngfr	Dyrk3	Commd1	Egr4	Tnfrsf25	Cntfr	Anxa6	Plpp3	Col5a2
Kcnc2	Mipol1	Mtm1	Cntln	Cerkl	Zfp326	Prepl	Mia2	RP23-214M22.3	March11	Pakap	Steap2	Rspo1	Mterf1b	Nebl	Thumpd2	Mgat4c	Naa16	Kbtbd3		Galnt14	Tcap	Map2k6	RP23-206J9.3	Stard6	Ppp1r2	Tmod2	Mis12	Rgcc	Nek11	Mff	Them4		Rph3a	RP23-284L6.7	Gpr139	Hist1h4b	Nanos3	Ern1	Ppp1r11	Nsun4	Npy2r	Ebf2	Copb2	Eid2b	Trib1	Cntrob	Ap1b1	Ppp1cc	Col6a3
Kcnh5	Mlip	Ncoa6	Cntn1	Cetn3	Zfp367	Prrg1	Mtf2	RP23-252E4.2	Mecom	Pank3	Supt16	S100b	Myrip	Nox1	Tmem194b	Mki67	Nasp	Klhl28		Galnt18	Tcf19	Mdm4	RP23-278C10.11	Synj1	Ppp6c	Ube2j1	Mocs2	Rmnd5a	Ninl	Mfsd8	Thyn1		Rpl38	Rsad1	Gpr155	Hist1h4c	Ncapg2	Fam124a	Prrg3	Ntpcr	Nts	Eed	Coprs	Eif1ad	Tspan17	Col20a1	Aplp2	Prokr2	Col7a1
Kcnma1	Neto1	Ndst3	Cntn4	Cfap36	Zfp9	Rab27b	Mthfd1l	RP23-331E5.6	Mitf	Pcf11	Syt4	Satb1	Ndufaf6	Nphp3	Tmem47	Mtmr7	Nck1	Lgalsl		Gli3	Tmem215	Mill2	RP23-32E20.1	Tfb1m	Pus3	Ube2ql1	Mrpl49	Rsrp1	Nkain3	Mmgt1	Timm17a		Rpl5	Rufy1	Grem1	Hist1h4d	Nupl2	Fam20a	Psmc1	Pcna	Olig2	Egln3	Cox11	Elob	Txnrd2	Coro7	Apod	Prr14	Crtc3
Kif16b	Nkain2	Negr1	Cntn5	CHDC2	Zfp938	Rab39b	Mybpc1	Sav1	Murc	Pdk3	Taf7	Scn8a	Nfia	Nrg4	Trpc4	Myh10	Nfyc	Lin7c		Glis1	Tshz2	Mrps35	RP23-376B19.2	Tmem74b	Pxmp4	Zc2hc1c	Myh15	S100pbp	Nkap	Mrpl54	Tmem123		Rps27	Sbno1	Grm2	Hist1h4i	Patl1	Fam222b	Rbm22	Pfdn1	Papss2	Enpp1	Crk	Enoph1	Uck2	Cpsf1	Aptx	Prrc1	Ctdp1
Kif21a	Nlgn1	Nell1	Cntn6	Chgb	Zranb1	Rfc4	Myo6	Sc5d	Myo1d	Plch1	Tmed5	Sel1l3	Osbpl3	Nrxn3	Tshr	Naf1	Nhlrc2	Lipo1		Golga4	Ttc33	Mtmr12	RP23-391I5.5	Tmsb10	Rab2b	Zfp184	Naip2	Sec22b	Nmbr	Mrps14	Tmem237		Rras	Scarf1	Gsap	Hist1h4k	Pcyt1b	Fam60a	Rnase4	Pgam2	Pcdha1	Ercc5	Csnk1a1	Epha8	Vipr1	Cradd	Arap3	Prss23	Ctxn3
Klf12	Nova1	Nlrp1b	Cntnap2	Chic1		Rgs4	N4bp2l2	Sdhaf3	Nckap5	Plscr4	Tmed7	Sept8	Otud7b	Ntn4	Xpr1	Nalcn	Nipsnap3b	Mars2		Gpatch2	Usp33	Myh11	RP24-229D22.2	Tusc1	Rbm7	Zfp239	Nars	Slc30a5	Nop14	Mto1	Tmem256		Rsg1	Sec23ip	Hey2	Hist1h4m	Pkmyt1	Farp1	Rom1	Prkra	Pcp4	Errfi1	Ctr9	Eva1b	Wdr3	Creld2	Arfgap1	Ptch2	Cyth1
Klhl32	Nsrp1	Nrg1	Cntnap5a	Chm		Rgs7bp	Nap1l1	Sdpr	Ncoa1	Poli	Tpgs2	Six4	Pinx1	Ntng1	Zbtb25	Ncapd3	Nmrk1	Mcts1		Grid1	Usp7	Nfkb1	RP24-308M3.1	Zbtb38	RP23-216P14.8	Zfp422	Ndp	Smek1	Nox4	Nanos1	Tmem261		S100a11	Setd8	Heyl	Hist1h4n	Plpp6	Fgd3	RP23-124N16.6	Psmb3	Peak1	Etnk2	Ctsc	Exosc4	Zfp568	Crmp1	Arfgap2	Ptpdc1	D930015E06Rik
Lama4	Olfm3	Nt5dc1	Cog5	Chpt1		RP23-221O14.10	Nars2	Sirt1	Nf1	Ppwd1	Tpmt	Slc13a5	Plb1	Nubpl	Zfhx4	Ndst4	Npepps	Med30		Grik4	Xpnpep3	Ngf	Rprd1a	Zfp119a	RP23-307M2.1	Zfp641	Ndufs4	Smg7	Nppc	Ncbp2	Tmem60		Sash3	Sf3a3	Hibadh	Hist2h2aa1	Pnma3	Flnb	RP23-403O11.1	Rac3	Peg10	Eva1c	Cxadr	Fam136a	Zscan20	Crtc1	Arfgef2	Raf1	Dab2ip
Larp1b	P2ry12	Park2	Col19a1	Chrdl1		RP23-275N21.2	Nptn	Skiv2l2	Nlk	Psma5	Tspan3	Slc1a2	Ppfibp1	Nxph1	Zfp202	Neu2	Nsd2	Mfsd14a		Grin2b	Zbtb11	Nhsl1	Rragb	Zfp143	RP23-32M15.2	Zscan21	Nefm	Sms	Npy5r	Ndfip2	Tmem88b		Scd3	Siah2	Hnrnpd	Hist2h2ac	Prdx4	Fnbp1	RP23-92G13.4	Rdh12	Phex	Eya2	Cxxc5	Fam216a		Csk	Arhgap23	Rbl1	Dcdc2b
Lclat1	Pate2	Parp8	Copg2	Ckap5		RP23-284F8.1	Nxf7	Slc30a4	Nme7	Pum2	Uqcrb	Slc39a10	Ppp2r5e	Odf2l	Zfp433	Nipal2	Osmr	Mgat2		Grip1	Zcchc6	Nid2	Rsph1	Zfp451	RP23-478I18.1		Nme5	Snrnp48	Oacyl	Nol11	Tspan6		Scnn1a	Slc16a12	Hs3st3a1	Hist2h3b	Prkar2a	Foxn3	RP24-219P17.1	Rnd2	Plagl1	Fam180a	D030056L22Rik	Fam69c		Cspg4	Arhgap4	Rft1	Dclk2
Lcor	Pcdh11x	Pcca	Cpeb4	Cldn34c1		RP23-325I3.1	Ophn1	Smim13	Nos1ap	Qrich1	Usmg5	Specc1	Ppp3cc	Olfr111	Zfp449	Npsr1	Otud4	Mmd		Grm1	Zfp790	Noc3l	Sag	Zfp781	RP24-228M19.1		Npy	Sox21	Oprk1	Osgin2	Tspyl5		Slc25a23	Slc22a5	Ifit1	Hist4h4	Psmg2	Foxo3	RP24-221F4.2	Rnf7	Plxna2	Fgd1	Dbp	Fancf		Ctnnbl1	Arhgdig	Rgl3	Ddx11
Lims1	Pde4b	Pcdh15	Cr1l	Clock		RP23-47M24.3	Pard3b	Swi5	Ntm	Rab9	Vps29	Sprn	Prim2	Pacrg	Zfp518a	Nucb2	Ovol2	Mospd1		Hivep3	Zfp940	Nsd1	Samd15	Zkscan2	RP24-276H6.1		Nr1d1	Spast	Oprm1	Ostm1	Ttc1		Smarcc1	Sord	Ifit3	Hnrnph3	Ptp4a1	Fry	Sars	RP23-24J10.5	Pmp22	Fgd6	Dcp2	Fbxo2		Cul9	Arhgef11	Rimklb	Ddx19a
Lmbr1	Pla2g4e	Pdgfc	Csrnp3	Cmc4		RP23-67E6.5	Pde5a	Tbp	Ntrk3	Rbmx2	Wbp4	Sptbn1	Prkd1	Pde6h	Zfp558	Onecut2	Papola	Mtif2		Jarid2		Nup98	Scml2		Rpa3		Nsf	Sptlc2	P2ry13	Pdf	Tubg2		Smyd4	Spice1	Ikzf2	Irak3	Ptpra	Fst	Seh1l	RP24-261H7.9	Prps1	Fgfbp1	Derl2	Fjx1		Cx3cl1	Arhgef2	RP23-172B16.4	Ddx31
Lrrc8b	Pnn	Phkb	Ctnna3	Cnot6l		RP23-83O23.2	Pdgfd	Tbr1	Nxpe4	Rc3h2	Xk	Stmn2	Psg16	Pkhd1l1	Zfp867	Otogl	Pdcd4	Mtpap		Kat6b		Osbpl2	Serpinb1a		Rpp38		Ntsr1	Syap1	Pank1	Pdhb	Ube2e1		Srp54b	Spty2d1	Ildr2	Junb	Rab39	Fto	Selk	Rpl26	Ptgs2	Fgfr2	Dhx29	Flot1		Cyp2d22	Arhgef25	RP23-20K21.1	Dgcr8
Lrrc8c	Poln	Plcb1	Cwc27	Cops2		RP23-86F8.3	Pds5a	Tdp2	Opcml	Rdx	Ythdc1	Stx3	Ptk2	Plek	Zkscan8	Pabpc5	Pir	Nab1		Kcnd3		Pappa2	Sertm1		Sccpdh		P2rx4	Taf5	Pcdh17	Pfdn4	Vezf1		Stx1a	Stk24	Iqub	Kbtbd6	Rasgrp1	Fyn	Slc14a1	Rpl31	Rab9b	Fhdc1	Dlat	Fnta		Cyp2s1	Arid3a	RP23-281H4.10	Diaph1
Luc7l2	Polr3g	Pld5	Cyp4x1	Cox20		RP24-251F16.4	Pdss1	Tet1	Osbpl6	Rlim	Zfp454	Sumo2	Ptprj	Plekha5		Pam	Pkd2	Ndufaf4		Kcnh1		Parp14	Skil		Sec23a		Pa2g4	Tamm41	Pcsk5	Phax	Vwa5a		Sulf2	Taok3	Jam2	Kif11	Rfk	Galnt11	Slc48a1	Rpl32	Rarb	Fmod	Dnajb6	Fstl3		Cyp4f17	Armc10	RP24-137C19.1	Dicer1
Lypd6	Pou6f2	Ppargc1a	Cyp7b1	Cox6c		RP24-269A16.1	Pgm1	Tifa	Otud7a	Rnf141	Zfp54	Sv2b	Rgsl1	Plppr5		Parpbp	Pla2g4a	Nedd4		Kcnip1		Phldb2	Smarce1		Selt		Pabpc1	Tfpi	Pde11a	Phospho2	Zfp365		Syt2	Tbca	Kcnq1	L3hypdh	Rhebl1	Gfod1	Snapc1	Rpl36a	Rgs2	Foxc1	Dnajc3	Fzd8		Daam2	Armc7	Rtn4ip1	Dnhd1
Magi3	Ppfia2	Ppp2r2b	Dcaf6	Cpeb2		RP24-562O19.4	Phc3	Timm9	P3h2	Rp2	Zfp583	Tgm3	Rnf111	Pms2		Pcdh10	Plekha1	Nipa2		Kcnn2		Phtf1	Smco3		Sf3b6		Paqr3	Thap2	Pde1c	Pmpcb			Tecr	Tbx18	Klhdc1	Lin7b	Rnf214	Gfra2	Snx14	Rpl37	Ric8b	Foxd1	Dnajc30	Gadd45b		Dag1	Armcx4	Scamp3	Dnm2
Man1a2	Ppig	Rasgef1b	Dcdc2a	Crls1		Rsrc2	Pias2	Tipin	Palmd	RP23-132L14.7	Zfp599	Tmem159	RP23-185A18.11	Pola1		Pcsk4	Polr3gl	Nmt2		Kctd1		Pigx	Snap29		Sft2d3		Pfdn5	Tiparp	Plppr1	Pno1			Thy1	Tchh	Klhl5	Mccc2	RP23-117O14.2	Glis3	Taf11	Rps15a	RP23-118L1.1	Fra10ac1	Dnajc9	Gadd45gip1		Dapk1	Arrb1	Sec24d	Dnmt3a
Man2a1	Ptchd1	Rev3l	Ddx10	Csnk1g3		Scoc	Pibf1	Tlr7	Pan3	RP23-249L6.2	Zfp617	Tnfsf13b	RP23-386F15.3	Polq		Pde8b	Prtg	Nrip1		Kirrel3		Pitpnc1	Spag16		Sgcb		Phf24	Tmem267	Plppr4	Ppdpf			Tmem127	Tex30	Lgr5	Mdm2	RP23-180L12.5	Gpr156	Timm8a1	Rps28	RP23-143D11.2	Fubp3	Drg1	Gal3st1		Dchs1	Arrdc2	Sertad3	Dpf3
Map4k3	Ptchd4	Rgs7	Dennd4a	Cul3		Sema3e	Pnisr	Tmem14a	Pcolce2	RP23-275N21.6	Zfp677	Tpd52	RP23-440B15.1	Ppm1e		Pds5b	Pwwp2a	Nt5c3		Klhl29		Pln	Spock3		Slc31a1		Pigw	Tmod3	Prkar2b	Ppp2r2d			Tmprss7	Tjp2	Lgr6	Mettl11b	RP23-338C22.2	Greb1	Tmed2	Rps29	RP23-149L10.1	Gjb2	Dusp7	Galnt6		Ddo	Asb1	Slc26a2	Dtnb
Map4k5	Ptger3	RP23-330D3.9	Dennd5b	Cwc22		Shcbp1	Pou2f1	Tmem170b	Pde8a	RP23-304L22.1	Zfp68	Trpv6	Scaf8	Ppp1r14c		Peg3	Ralgps2	Oard1		Ksr2		Ppp4r1	Sqle		Slc33a1		Pik3r6	Tnfaip8	Prlr	Prkx			Tnni1	Traf6	Lipa	Mpc2	RP23-407B23.1	Grik3	Tmem167b	S100a1	RP23-159L13.1	Glb1l	Dync1li1	Gcsh		Ddx39	Asb8	Slc29a4	Edc3
Mapk10	Ptprr	RP23-50F19.4	Dmd	Cwf19l2		Slk	Prdm9	Tmem56	Pdzrn4	RP23-372O9.2	Zfp809	Tshz3	Sdccag8	Ppp2r2a		Pkhd1	Rap1gds1	Ociad1		Lama3		Prkab2	Srp19		Smim8		Plp2	Topbp1	Qpct	Psme1			Trp53bp1	Trip10	Lrrc9	Mrpl57	RP23-414K1.4	Hdac4	Tmem38b	Sco2	RP23-317F9.2	Grhl1	E2f5	Gdpd2		Ddx39b	Asic1	Slc41a3	Eepd1
Mast4	Rab11fip2	RP23-54E16.2	Dnah14	Dazl		Smarca1	Prn	Topors	Pex5l	RP23-386E10.7	Zfp931	Tspan11	Sec22a	Ppp4r4		Plcxd3	Rbm12b2	Orc5		Limch1		Prkag2	Srr		Smpdl3a		Poc1a	Tor1aip2	Rab40b	Rab11a			Tspan33	Trmt10b	Lsmem1	Mrps22	RP23-42P24.4	Hdac7	Trp53inp1	Sdha	RP23-325H23.1	Grpel2	Eci1	Gemin2		Ddx41	Asrgl1	Slc7a7	Entpd1
Mbtd1	Rad50	RP24-472I15.1	Dnajc13	Dcun1d1		Snap25	Prpf4b	Trim7	Pfkfb1	RP24-77I21.3	Zfp932	Zfp28	Sept11	Primpol		Plekhm3	Rbm5	Orc6		Lmntd1		Prom1	Sytl5		Socs4		Polr2b	Tra2b	Rabl3	Rab14			Ttc25	Uap1	Ly6g6e	Mrps9	RP23-43G12.1	Heg1	Tti2	Smim10l2a	RP23-371K8.1	Gtf2e2	Egln1	Gfm1		Dgkg	Atcay	Slc9a3r1	Ep300
Mcf2	Rgs17	RP24-483G17.1	Dnajc21	Ddx3x		Snca	Pspc1	Trmt6	Phka2	Rpl17	Zfp983	Zmym1	Siae	Prkg1		Pot1b	Rell1	Oxct1		Lpp		Pros1	Tac2		Spryd7		Polr3k	Trp53rkb	Rasgrf1	Rab33a			Ttc39a	Ube2l6	Lyn	Myh7b	RP24-103K4.5	Helz	Ube2m	Smu1	RP23-44G15.5	Gxylt2	Eid2	Gpx1		Dido1	Atg101	Srp54a	Epg5
Mcmdc2	Rit2	Rpgr	Dock7	Dis3		Snx4	Ptpn12	Txndc17	Phlpp1	Rsl1d1	Zik1	Znhit6	Slc35a3	Prrc2c		Ppm1l	Retreg1	Paip1		Lrch1		Prrx1	Tagap1		Taf9b		Pop5	Ttc26	Rbms3	Ranbp1			Ttf2	Upf3a	Map3k1	Myo18b	RP24-158L15.1	Hira	Ubxn8	Snrnp200	RP23-81P12.2	Gypc	Eif3h	Gpx7		Disc1	Atg16l1	Stat5a	Epn2
Memo1	Rmdn2	Rtkn2	Dpp10	Dld		Socs6	Ptpn2	Ube2q2	Pknox2	Rtn3	Znrd1		Snap23	Ranbp17		Prcp	Rhobtb3	Parg		Lrfn2		Ptar1	Tcaf1		Tax1bp1		Ppa2	Uba5	Rgag1	Rbak			Tyrobp	Vps37d	Map3k20	Nefl	RP24-443B5.2	Hivep1	Utp11	Srm	RP24-190H19.2	Hars2	Elmod2	Grhpr		Dlg5	Atg2b	Sync	Eri3
Mllt10	Rnf17	Samd12	Dpy19l1	Dlg1		Srsf11	Rab30	Ubxn7	Plcl1	Sep15			Sntb2	Rasa2		Prr16	Rictor	Pcmtd2		Lrmda		Ptgfr	Tceal5		Tbck		Pradc1	Vapa	Rhoj	Rbl2			Ubox5	Vps45	Mcub	Nek2	RP24-93H15.3	Hlcs	Vsig10	Stra13	Rpl39	Hbb-bt	Eloa	Gtpbp6		Dlgap4	Atg4b	Syt6	Esyt1
Mnat1	RP23-114B10.4	Sbf2	Drp2	Dmxl1		Ssb	Rad17	Ulk2	Prickle1	Serbp1			Sorcs3	Rasgef1c		Pth2r	Rnf20	Pdzph1		Lrrc16a		Ptprb	Thg1l		Thap12		Prdm4	Vps36	Rnf128	Rcn2			Upp1	Washc2	Mdfic	Nudt14	Rpl22l1	Hmg20a	Xaf1	Supt4a	Rttn	Heatr3	Epop	H2afj		Dll4	Athl1	Tacr1	Evc2
Msrb3	RP23-145N4.1	Sema5a	Dtna	Dmxl2		Ssbp1	Rai14	Usp16	Prickle2	Setd6			Srgap2	Rbms1		Ptprz1	RP23-233B6.2	Peli1		Lrrc28		Pus7	Tle4		Tmem263		Prkcq	Whamm	Robo1	Rmi1			Vamp1	Wdr41	Meis1	Nudt16	Rprd2	Hpse	Zdhhc12	Supt6	Ryr3	Helq	Eprs	H2afv		Dnaaf5	Atp11a	Tap2	Fam19a5
Myo5c	RP23-14F5.7	Sema6d	Edil3	Dnajc8		St8sia4	Rap1a	Utp3	Prr5l	Siglech			St3gal6	Rfx3		Rad52	RP23-390C6.1	Pi4k2b		Macf1		Pxk	Tmco5		Tmem68		Prox1	Ybx3	RP23-311O20.2	RP23-211B19.2			Wdr49	Wdr43	Meis2	Otx1	Rps27rt	Hrh1	Zdhhc22	Tbc1d25	S1pr5	Hmgcs2	Eps8	H2afz		Dnajc17	Atp1a2	Tfcp2l1	Fam227a
Nefh	RP23-173N16.6	Sfmbt1	Eea1	Dnm1l		Sumo1	Rb1	Vkorc1l1	Ptprc	Slc35a1			St7	Rnf150		Rapgef5	RP24-127M20.2	Pitrm1		Maml2		Ranbp3l	Tmem125		Tmx1		Psma2	Yipf6	RP23-453K8.1	RP23-222G22.7			Xylb	Wdr76	Mex3a	Paf1	Rwdd2a	Hspbap1	Zfp658	Tigar	Sdr42e1	Hnrnpa0	Ercc8	Hapln2		Dner	Atp2b3	Tm7sf3	Fbln2
Nek1	RP23-17P12.8	Sgcd	Elavl4	Dnttip2		Tank	Rcor3	Vps50	Ptprt	Slc35a5			Stk39	Rnf180		Rgs20	RP24-234J3.4	Plod2		Maml3		Rap1b	Tmem62		Tmx4		Pttg1	Zbtb2	RP23-57P23.5	RP23-281H4.3			Zbtb34	Wnt10a	Mynn	Pcmt1	S1pr1	Htt	Zfp661	Timm8b	Slc18b1	Hnrnpf	Eri1	Hck		Dnmbp	Atp6ap2	Tmem198b	Fbrsl1
Nfat5	RP23-206D14.1	Sgip1	Ell2	Dopey1		Tex14	Reep3	Ywhah	Qrfpr	Slc39a12			Sumf1	Rnls		RP23-109G18.5	RP24-354K18.1	Polr3f		Map2k5		Raver2	Tomm70a		Trnt1		Pum3	Zcrb1	RP23-91K11.3	RP23-303C8.6			Zfp551	Zc3h8	Nabp1	Pgm3	Sat2	Ide	Zfp870	Tmem175	Slc22a3	Hnrnpll	Esd	Helb		Dock6	Atp6v0a1	Tnfrsf1a	Fbxw4
Nfib	RP23-216C6.2	Shtn1	Epha7	Dynlt3		Tial1	Reps1	Zbtb44	Ralgapa2	Slc39a8			Syt14	RP23-152N9.3		RP23-24A13.2	Rsbn1	Pon2		Mark3		Rbpms	Trpv3		Tspan12		Pus7l	Zfp189	Rps6ka5	RP23-57F11.1			Zfp575	Zfp384	Ndn	Pgp	Sepsecs	Ifit3b	Zscan26	Tmem258	Slc25a53	Hps5	Faap24	Herpud1		Dot1l	Atp6v0e	Tor3a	Fmnl3
Ninj2	RP23-253N17.1	Slc35f4	Epm2a	Dzip3		Tmeff1	Ric1	Zdhhc13	Rbfox1	Slc6a15			Tbc1d15	RP23-242C19.8		RP23-294G7.3	Rsf1	Ppid		Mcph1		Rcor1	Tspan7		Ttpa		Rab3ip	Zfp30	Rps6ka6	RP24-194D17.3				Zfp445	Ndnf	Pip5kl1	Sgk2	Ift140		Tmem40	Slc30a1	Icam1	Fam107b	hexb		Dzip1l	Atp8b2	Trit1	Fn1
Nktr	RP23-282C23.7	Slc9a9	Eqtn	Ebag9		Tmem184c	Rmdn1	Zdhhc20	Rgs6	Slitrk1			Tbc1d31	RP23-243J5.1		RP23-326E2.2	Rtp4	Ppm1d		Me3		Rnf169	Tspyl2		Twf1		Rabggtb	Zfp35	Scn9a	RP24-216A12.2				Zkscan6	Nedd1	Pkp4	Shh	Igf1r		Tti1	Slc5a7	Ier5	Fam149a	Hint1		Edc4	Atxn2l	Ust	Foxo1
Npas3	RP23-355G16.5	Smap1	Erbb4	Eid1		Tnfsf10	Rnf138	Zfp141	Rhobtb1	Smim15			Teddm2	RP23-297K24.1		RP23-341M13.1	Samd8	Ppp2r3c		Med12l		Rnf43	Vldlr		Usp37		Rac1	Zfp382	Sept10	Rpe					Nhs	Plpp1	Slc25a17	Il18bp		Tuba1b	Stk32a	Ifitm3	Fam210a	Hist1h2bc		Eng	Atxn7l2	Vasp	Frem2
Nr6a1	RP23-35N23.2	Snx7	Ercc6l2	Eif2ak2		Triqk	Rnf152	Zfp146	Rora	Sowahc			Tek	RP23-454A11.1		RP23-424C4.5	Scd1	Ppt1		Mob3b		RP23-275N21.4	Wdr92		Usp46		Ramp3	Zfp420	Serpinb6a	Rprm					Nmb	Pole4	Slc35f5	Ints9		Tuba4a	Strip2	Ifnar1	Fam3c	Hist1h4a		Ep400	Axin1	Wiz	Gabpb2
Nrd1	RP23-67E6.2	Sugct	Erlec1	Eif2s3y		Trmt10c	Rnf38	Zfp207	RP23-192C21.1	Spcs3			Tesk2	RP24-354I13.6		RP23-446P16.2	Setx	Prkaa1		Mpped2		RP23-354A20.1	WI1-955B2.1		Vps35		Rbp4	Zfp59	Slc25a21	Rps27l					Npffr2	Ppp1r35	Snx12	Intu		Tubb4b	Strn	Il6ra	Fas	Hist1h4j		Epas1	B3gat1	Wnt5a	Gan
Nudt6	RP23-71L21.2	Tbc1d19	Etv1	Eif3a		Tspan2	Rngtt	Zfp27	RP23-411B7.2	Sptssb			Tmem178	Sap130		RP23-466M3.1	Slc12a2	Prnp		Mpzl1		RP24-106M14.2	Ywhab		Yod1		Rdh5	Zfx	Slitrk6	Sar1b					Npr1	Prmt6	Sp1	Iqgap1		Ubb	Tac1	Inhbb	Fbxl3	Hmbs		Evc	B4galt2	Wtip	Gatad2a
Numb	RP24-267I24.5	Thsd7b	Exph5	Eif5b		Tusc3	RP23-74O4.1	Zfp354b	RP23-411B7.5	Tcaim			Trabd2b	Scmh1		RP23-467K15.2	Slc17a5	Prpf38a		Mrps28		Sesn1	Zbtb33		Zbed5		Rmnd1		Sppl2a	Scpep1					Nrip3	Pstk	Spata24	Iqsec1		Ubl4a	Tacr3	Ipmk	Fbxo22	Hook2		Evl	B4galt5	Zfp212	Gbf1
Olfr1564	RP24-456P10.1	Tmem169	F8	Elp4		Twistnb	RP24-258O12.2	Zfp74	RP23-49H16.1	Tceal8			Ttll5	Senp7		RP23-79J15.4	Slc19a3	Ptcd3		Msra		Sgms1	Zdbf2		Zfp128		Rnaseh2b		St8sia3	Sdhaf4					Nup43	Ptpn18	Stpg1	Iqsec2		Uqcr10	Tbc1d7	Irs1	Fbxo4	Hsf4		Fam120a	Bace1	Zfp36	Git2
Olfr78	Samd3	Tpk1	Faf1	Emc2		Txlng	RP24-372E2.1	Zfp780b	RP23-85G19.2	Tfg			Ttn	Slc16a2		RP24-320O9.1	Slc38a9	Purb		Mtus2		Siah3	Zfp105		Zfp229		RP23-231E23.4		St8sia6	Sec11c					Osbpl9	Pwp1	Suclg2	Itpr1		Usp39	Tmem158	Itih2	Fdx1	Hus1		Fam160b2	Bax	Zfp777	Gli2
Osbpl1a	Sass6	Trip11	Fam135a	Erbb2ip		Uba6	Rsbn1l	Zfp874b	RP24-245M20.2	Tma16			Twist2	Slc2a9		RP24-559D1.1	Smad2	Rab5a		Myt1l		Slc22a8	Zfp119b		Zfp26		RP23-391M18.7		Stac	Serpinb9					Pappa	Pyroxd1	Tbx3	Itpr2		Vps33a	Tpd52l1	Itih5	Fech	Iba57		Fam171a1	Bcap31	Zic4	Gltscr1
Oxr1	Scn1a	Ubap2l	Fam135b	Ergic2		Ufl1	Rsl1	Zfp91	RP24-297H17.3	Tmem106b			Ubtd2	Sntg2		Samd5	Smad9	Rad21		Nav2		Slc25a24	Zfp39		Zfp472		RP23-6A9.2		Stk26	Sike1					Pax6	Rab32	Tmem100	Jakmip3		Xpo7	Tram1l1	Kcnk13	Fgf22	Icam2		Fam173b	Bccip		Gmip
Pbdc1	Sept7	Uty	Fam13a	Esco1		Vcpip1	Rspry1	Zfp951	Rsph10b	Tmem74			Unc13b	Spidr		Scn3a	Smarcad1	Rbbp9		Ndufaf2		Slc25a27	Zfp429		Zfp760		RP23-90C6.1		Stk33	Ska2					Pbx3	Rab34	Tmem69	Jam3			Trem2	Kdm3b	Fgl2	Icam5		Fam188b	Bcl9l		Gon4l
Pcgf5	Sfrp4	Vwa8	Fam172a	Esf1		Vsnl1	Rufy2	Zkscan1	Rsu1	Tmf1			Uvrag	Stxbp6		Sco1	Socs2	Rbm39		Nol10		Slc30a7	Zfp937		Zfp763		RP24-474C15.1		Tmem17	Slc17a6					Pcbp3	Rccd1	Tmem79	Katnal2			Tro	Kdsr	Fut11	Id1		Fam193b	Bcor		Grhl3
Pde4d	Sgce	Wdpcp	Fap	Evi5		Vstm2a	Scfd1		Runx2	Trim23			Vav3	Sybu		Sh3kbp1	Sos2	Rnf11		Npas2		Slc38a11	Zfp941		Zfp869		RP24-85H21.6		Tnfaip8l3	Slc25a16					Pde3a	Rhbdd1	Tmem97	Kcnk12			Unc13c	Klf2	Fzd7	Ier5l		Fam219a	Bcs1l		Grip2
Pde7a	Slc35f1	Wnk1	Far2	Fam76b		Yaf2	Sec61a2		Ryr2	Trim36			Vps13c	Tex15		Skap1	Spop	Rnf168		Nrg2		Slc38a5			Zfp964		Rps6		Trhr	Slc25a4					Pecr	Rheb	Tob1	Kcnq4			Usp2	Lemd3	Gas1	Irf2bpl		Fam3a	Bex2		Gsdmd
Pdzrn3	Slco4c1	Wrn	Fbxo11	Fam81a		Zfp300	Sema3c		Sdk1	Trim44			Vps8	Tmem131		Slc26a4	Ssbp2	Rnft1		Nsd3		Slc9b2			Zscan12		Rraga		Trim5	Slc30a9					Pggt1b	Rnaseh2c	Trim12c	Kif13a			Vwa5b1	Lmod1	Gemin7	Jsrp1		Fam65a	Bfar		Gtf2h2
Phtf2	Slit2	Zeb2	Fbxo47	Fancm		Zfp459	Slain2		Sec24a	Trim59			Wdr33	Tmem163		Slitrk3	Stam2	RP23-284J4.2		Nsmaf		Smarca2			Zxdb		Sdhaf1		Usp29	Snapin					Piezo2	RP23-147I23.2	Trim16	Kif13b			Ywhae	Lrrc57	Gfer	Jund		Fan1	Bloc1s2		Heatr5a
Pias1	Tenm1	Zfand4	Fbxw7	Far1		Zfp62	Slc25a32		Setbp1	Ttc9c			Zfp366	Tnik		Slmap	Stambpl1	RP23-377I11.1		Nsmce2		Smim14					Sem1		Vta1	Snrpf					Pigf	RP23-161B9.10	Tube1	Kif26b			Zfp58	Lrrk1	Ggh	Kcne1l		Fasn	Bloc1s3		Herc2
Pign	Tmem232	Zfp248	Fcho2	Fgd4		Zfp758	Slf2		Sh3d19	Tulp4				Tnpo1		Spag6	Stard4	RP23-461O23.5		Ntrk2		Smoc2					Sept4		Xlr3b	Snx16					Plekha2	RP23-168M5.3	Tubgcp4	Kmt2a			Zic3	Ltn1	Gid4	Kcnmb4		Fat1	Bmf		Homer2
Pik3ca	Tmem243	Zfp438	Fgf14	Fgf9		Zfp759	Smchd1		Sh3gl2	Uba3				Trat1		Stpg2	Stk17b	RP24-399B3.5		Olfr691		Spaca6					Setmar		Zbbx	Sox17					Plekhd1	RP23-312H15.9	Uprt	Lace1			Zim1	Lyst	Gins4	Kiss1r		Fbrs	Bmp7		Ice1
Pip4k2a	Tnnt2	Zfp804b	Fggy	Fmr1		Zfp825	Spata1		Sh3rf3	Ube2d3				Trdn		Syndig1	Stk38l	Rpap2		Osbp2		Spred1					Shisa4		Zbtb20	Sptssa					Pm20d2	RP23-359B23.5	Uxt	Lamc1			Zswim5	Macrod1	Glrx2	Klc3		Fes	Bpgm		Ift43
Pip5k1b	Tox	Zfp820	Fhad1	Fnip1		Zfp930	Spata5		Shisa6	Ube2n				Usp3		Tenm2	Supt20	Rpf1		Osbpl10		Ss18					Sik2		Zc3h12c	Tceal9					Ppapdc1a	RP24-214P19.2	Vangl2	Las1l				Map3k8	Gmnn	Klhdc9		Fhod1	Brap		Igdcc3
Platr25	Tpr	Zmat4	Fip1l1	Foxj3		Zfp944	Srek1		Slc16a10	Ubxn2a				Uxs1		Thsd7a	Susd5	Rrm2b		Pacs1		St3gal5					Skida1		Zfp457	Tiprl					Prkdc	RP24-426M1.3	Wsb1	Lrrfip1				Med23	Gnpda1	Krt10		Fkbp15	Brd1		Igsf11
Plcb4	Trdmt1		Flrt2	Gabra1		Zfp946	Srsf5		Slc24a3	Uchl3				Vmn2r1		Tmtc1	Synm	Rufy3		Palld		Stambp					Skp1a		Zfp947	Tirap					Prune2	RP24-565B3.5	Xpo1	Ltk				Mfn1	Gnptab	l7Rn6		Flt4	Brf2		Igsf21
Pparg	Trpc5		Fmn1	Gabra4		Zfp955b	St7l		Slc9a7	Ugcg				Vwc2		Trim24	Taf1b	Samd9l		Palm2		Swap70					Slc17a8		Zfp959	Tlcd1					Ptpro	Rsph3a	Zc4h2	Map4k4				Mgp	Golga7	Larp6		Foxg1	Bri3bp		Igsf9b
Ppp3ca	Trpc6		Fut8	Gabrg2		Zranb2	Stxbp3		Slco1c1	Ugt8a				Wdr27		Upf3b	Tbata	Scaf11		Parn		Tbc1d1					Slc40a1			Tm9sf2					Rab37	Senp1	Zfp110	Mapk14				Mrc1	Golga7b	Lmna		Foxk1	Brpf1		Ikbkb
Ptpn21	Trps1		Fut9	Galnt1		Zrsr1	Stxbp4		Slfn8	Uqcrc2				Yes1		Uvssa	Tbce	Scrn3		Pbx1		Tdp1					Snapc5			Tmem126a					Rai2	Serf1	Zfp626	Mapkap1				Mrvi1	Golt1b	Lrfn1		Frmpd1	Brsk2		Il17rd
Ptprk	Ube2d1		Fyb	Gda			Supt3		Smurf2	Usp14				Zeb1		Vcan	Tbl1x	Secisbp2l		Pde10a		Tgfb2					Snrpn			Tmem126b					Rassf4	Sh2d4b	Zfp764	March3				Ms4a6b	Gp1bb	Lrfn3		Fryl	C1qtnf1		Incenp
Ranbp9	Ube2r2		Gabra3	Gdap1			Swt1		Smyd3	Wbscr27				Zfp385b		Vwc2l	Thsd1	Sepp1		Pdss2		Thada					Sparcl1			Tmem168					Rerg	Slbp	Zfp786	Mast2				Msh6	Gpatch11	Lrrc24		Fyco1	C2cd3		Ino80d
Rapgef4	Vmn2r55		Gabrb1	Ggps1			Tada2a		Sobp	Wnk3				Zmym6		Washc3	Tia1	Sh3bgrl		Phactr1		Tnc					Srp72			Tmem192					Rnaset2b	Slc35g2	Zfp873	Mb21d2				Mtbp	Gpx8	Lrrc38		Gcn1l1	Cacfd1		Inpp5a
Raph1	Wdr17		Gabrb2	Gin1			Taf15		Spock1	Yme1l1				Zmynd12		Xrcc4	Tmem57	Slc38a6		Phf21a		Ttc23					Sstr2			Tmem203					Rnf32	Sox18	Znrd1as	Med12				Mtmr10	Gskip	Lrrc4b		Gk5	Cacnb3		Inpp5b
Rasgrf2	Wnt9a		Gas2	Gk			Tbc1d12		Ssh2	Zbtb6				Zpbp		Zc3h6	Tmem67	Smndc1		Phf8		Ttc27					Surf2			Tmem230					RP23-115A1.5	Ssu72	Zscan22	Med26				Mtmr11	Gspt1	Ltc4s		Gmeb1	Camk2a		Iqce
Rasgrp3	Xkr4		Gcc2	Glrb			Tbc1d23		Tcf4	Zfand1				Zranb3		Zfp286	Tmem87a	Snrpd3		Pid1		Ubp1					Tcte1			Tmem41b					RP23-177J21.2	Tagap		Megf11				Mycn	Gtf2a1	Ly6h		Gmeb2	Camkk2		Irf9
Rassf3	Zc3h12b		Gcnt4	Gnai1			Tcf12		Tcp11l1	Zfp2						Zfp804a	Tra2a	Snx10		Plekhg1		Usp13					Tle6			Tmem64					RP23-211P15.8	Tbk1		Mfap2				Mylip	H2-Ab1	Maf1		Gpld1	Camsap1		Ist1
Rassf9	Zdhhc15		Golim4	Gnl2			Tfdp2		Tcte2	Zfp281							Trim30a	Srfbp1		Plekhh2		Usp6nl					Tmem141			Tmem9b					RP23-296J10.4	Tmem202		Mfsd7c				Mylk	H3f3a	Magohb		Gramd1b	Camta2		Itga7
Rbks	Zfp277		Gpc5	Golga5			Tmem161b		Tdrd5	Zfp455							Trmt13	Srsf10		Plxna4		Wisp1					Tppp			Tnks2					RP23-314N18.4	Tradd		Mgat5				Myof	H3f3b	Map1s		Grid2ip	Capn1		Itga9
Rbm6	Zfp612		Gria3	Gopc			Tmem200a		Tjp1	Zfp493							Trmt5	Ssr3		Poc1b		Xkr7					Trim13			Tnnt1					RP23-42I13.2	Tspan13		Mgmt				N4bp2l1	Hadhb	Mblac1		Grik5	Capn2		Itpr3
Rbpj	Zfp711		Gria4	Gpm6a			Top1		Tmem108	Zfp639							Ube3c	Stam		Polb		Zbed4					Ttll1			Trmt2b					RP24-248P14.2	Vkorc1		Mical2				Ncbp3	Hat1	Mc4r		Grin2d	Capn5		Itsn1
Rcan2	Zfp810		Grm7	Gpm6b			Trmt11		Tmem132d	Zfp655							Zbtb37	Strap		Prkca		Zbtb46					Tuba1c			Ttc30b					RP24-90K1.5	Zfp69		Mical3				Ncoa5	Haus2	Mcrip2		Grm4	Car7		Jakmip1
Rgs22	Zfp994		Gtdc1	Gria2			Trpm7		Tmem178b	Zfp874a							Zc3h7a	Stx12		Prkce		Zzz3					Tubb4a			Ttl					Sall1	Zfp853		Mllt4				Ndfip1	Hdac1	Metrn		Gtf2ird1	Card10		Kank3
RP23-188K3.6	Zmat1		Hcn1	Gtf2h1			Txlnb		Tmem241	Zmym5							Zcchc4	Stx7		Ptprg							Uba52			Ubxn4					Sall3	Zswim7		Mlxip				Nepro	Hes1	Mettl23		Hcfc1	Card9		Kdm5b
RP23-330D3.5			Hdx	Gtpbp4			U2surp		Tmem29	Zyg11b							Zfand6	Suco		Ptprm							Ubl5			Ufm1					Scube2			Mmrn2				Nfkbiz	Hes5	Mex3d		Helz2	Carm1		Kif23
RP23-360A2.3			Hecw1	Hapln1			Uhrf1bp1l		Tmtc2								Zfp398	Suz12		Ptprn2							Utp4			Vbp1					Sdc2			Mob2				Nid1	Hes6	Mis18a		Hexdc	Casc3		Klhdc10
RP23-388P16.4			Herc6	Haus6			Vmp1		Tnnc1								Zfp560	Sypl		Pus10							Washc5			Vcpkmt					Sema3d			Morn1				Nod1	Hfe	Mocs1		Hip1	Catsperd		Klhl3
RP23-431F3.1			Hpgds	Hdgfrp3			Vps54		Tnni3k								Zfp57	Taf1d		Rbfox3							Wdr35			Vdac2					Sfxn4			Mov10				Nostrin	Hilpda	Mocs3		Hmgcl	Cbfa2t3		Lama1
Rpe65			Ift81	Hectd2			Zbtb1		Tox3								Zfp871	Tbpl1		Rbm20							Wdr37			Vip					Sgms2			Mpdz				Nr2f2	Hmg20b	Mpst		Hsf1	Ccdc114		Lamb2
Rras2			Il1rap	Hells			Zfc3h1		Traf5								Zfp949	Tceal1		Rere							Zar1l			Wdr75					Sh3bgrl2			Msi2				Nrgn	Hmgn2	Mpzl3		Hspa12b	Ccdc130		Lamc3
Rspo2			Il1rapl1	Herpud2			Zfyve16		Trpc3								Znrf2	Tfb2m		Rnf144a							Zbtb18			Ybx1					Shisa8			Mtcl1				Nufip1	Hnrnpab	Mrpl13		Hspb1	Ccdc137		Lhfpl2
Rwdd3			Il1rapl2	Hgf			Zmym4		Tspan5									Tmem144		RP23-113I19.2							Zcchc17			Ywhaq					Slc12a8			Myo19				Nup205	Hnrnpm	Mrpl36		Hspg2	Ccdc155		Lmtk2
Satb2			Il20rb	Hltf			Zwilch		Ttc17									Tmem209		RP23-133N21.3							Zfp106			Zfp24					Slc4a4			Nck2				Ogn	Hsd17b4	Mrpl41		Htr6	Ccdc159		Lrig1
Sestd1			Ism1	Hmgcs1					Ttc37									Tmem229a		RP23-175J8.3							Zfp112			Zfp287					Slc4a7			Ncoa3				Osr1	Hspa13	Mrpl43		Hydin	Ccdc163		Lrp8
Sidt1			Itga4	Hnmt					Wbscr17									Tram1		RP23-207N15.3							Zfp114			Zfp397					Slco5a1			Nedd4l				Ostf1	Hspa9	Mrpl47		Hyou1	Ccdc167		Lrrc45
Slc25a40			Jakmip2	Hook1					Wdr7									Trappc2		RP23-303F24.3							Zfp235			Zfp426					Slx4ip			Nfasc				Pank2	Hvcn1	Mrpl52		Ighmbp2	Ccdc28b		Lsg1
Slc26a8			Jph1	Hsbp1l1					Zfp607									Trappc6b		RP23-345D6.11							Zfp563			Zfp46					Snap91			Nhej1				Paox	Hyal1	Mrps12		Igsf3	Ccdc6		Mad1l1
Slc2a13			Kcnh7	Hsp90aa1														Trmt1l		RP23-363J16.2							Zfp715			Zfp709					Sntb1			Nin				Pawr	Id3	Mrps30		Inadl	Ccdc91		Man1c1
Slc41a2			Kcnip4	Ice2														Trove2		RP23-418M3.4							Zfp868			Zfp719					Sox4			Nmnat2				Paxbp1	Id4	Mrps34		Inf2	Ccdc92b		Map3k14
Slc8a1			Kcnj3	Ift57														Tsg101		RP23-42N14.3							Zmat2			Zfp791					Sp8			Nol4l				Pgm5	Ier2	Msl3l2		Inpp5j	Ccne1		Mark2
Slc9a3			Kcnt2	Ift74														Tstd3		RP23-464P12.1							Zwint			Zfp850					Spats2			Nr2c1				Phactr2	Ifngr1	Mvb12a		Insr	Ccnjl		Matn2
Slco1a4			Khdrbs2	Igip														Txndc16		RP24-227O16.1										Zfp963					Spon1			Nrp1				Phactr4	Ifngr2	Myadml2		Ints2	Ccnk		Mccc1
Snapc3			Kif3a	Immp1l														Txnl1		Runx1										Zkscan4					Supt7l			Nsun2				Phka1	Ift46	Mzf1		Ipo4	Ccs		Mcf2l
Sorcs1			Kif5c	Impad1														Ube2d2a		Samd4										Zrsr2					Synpr			Nt5c2				Phykpl	Igfbp6	Nat1		Itgb4	Ccsap		Mdn1
Sox5			Kmt2e	Ints13														Ube2v2		Scfd2															Syt10			Nuak1				Pik3ap1	Inip	Ndel1		Jup	Cd109		Mecr
Sox6			Ktn1	Ipcef1														Ublcp1		Scube1															Syt9			Nup93				Pik3cb	Ints14	Ndufa6		Kank1	Cd163		Med13l
Spag9			Lcorl	Iqcb1														Ubr1		Sec24b															Tctex1d2			Odf2				Pip5k1a	Isca2	Ndufab1		Katnb1	Cd248		Med15
Spats2l			Lgi1	Itgav														Ugp2		Sema6a															Tenm3			Olfm2				Plat	Itpripl1	Ndufc1		Kazn	Cd276		Med27
Srpk2			Lingo2	Itsn2														Usp38		Shisa9															Th			Otud3				Pld1	Itpripl2	Ndufc2		Kcnb1	Cd2bp2		Mertk
Stag1			Lrfn5	Jade3														Utp6		Shroom4															Tll1			Pag1				Plekha8	Kcnh6	Ndufs7		Kcnj12	Cd300d		Mfhas1
Stk3			Lrp1b	Kansl1l														Vamp4		Slc10a7															Tm6sf1			Pced1b				Polg2	Klf4	Nfkbib		Kcnn3	Cd52		Mgat5b
Strbp			Lrrc4c	Kdm4c														Vps4b		Slc22a15															Tmem255a			Pcnxl2				Polh	Klf9	Nkx2-2		Kcnt1	Cd74		Msn
Sun1			Lrrc6	Kdm6a														Wdhd1		Slc22a21															Tmod1			Phf21b				Polr3c	Krr1	Nkx6-2		Kctd15	Cd93		Myo1c
Syt16			Lrrc7	Klhl23														Wdr11		Slc22a23															Trh			Plekha6				Pop1	Lamtor3	Nol3		Kdm2b	Cdan1		Myo9b
Taf1			Lrrfip2	Klhl6														Wtap		Slc25a26															Tsga10			Pnldc1				Pphln1	Lbp	Npl		Kdm6b	Cdc25b		Nadsyn1
Tbl1xr1			Lrrtm4	Kpna3														Xiap		Slc35f3															Tshz1			Podn				Ppm1b	Lipt2	Nqo2		Kmt2b	Cdh5		Nav1
Tgfbr1			Luc7l3	Kras														Xrcc5		Slc8a3															Ttc12			Pou2f2				Ppp3r1	Llgl2	Nrarp		Kmt2d	Cdk20		Nfatc1
Thrb			Macc1	Krcc1														Yipf4		Slit3															Tuba8			Ppargc1b				Ppp6r3	Lman1	Nrbf2		Krba1	Cdk2ap1		Nhsl2
Thumpd3			Magi2	Krt222														Zbtb41		Smg1															Txnrd3			Ppm1h				Prdm6	Lnx2	Nudcd2		Ksr1	Cdk5		Nkd1
Tmc1			Mansc1	Lactb2														Zfp11		Smg6															Ube2e3			R3hdm2				Prg4	Lrrc58	Nudt10		Larp1	Cdk9		Notch2
Tmcc1			Map2	Lamp2														Zfp169		Snx24															Ube2k			Ralgps1				Prickle3	Lrrc8a	Nudt19		Lars2	Cdr2l		Nphp4
Tmem135			Map3k7	Lin28b														Zfp266		Snx29															Ube4a			Rbm33				Prpf3	Lsm1	Nup155		Lhfpl4	Cebpzos		Npr2
Tmem245			Map9	Lin54														Zfp418		Sp100															Usp40			Rffl				Prss35	Lsm8	Nxt1		Lig1	Cecr5		Nrap
Tom1l1			Mbd5	Lmbrd1														Zfp60		Spink10															Wars2			Rgs11				Ptgdr	Lyrm7	Olig1		Lins1	Cecr6		Ogt
Ttc39b			Mblac2	Lmbrd2														Zfp78		Srrm4															Xpa			Rhoh				Ptges	Lysmd2	Orai1		Lman2l	Celsr1		Oprd1
Ube2e2			Mbtps2	Lmo4														Zfp811		St6galnac3															Ypel5			Rimbp2				Ptpn13	Lzts2	Pak1ip1		Lmf1	Cenpt		P2rx7
Ubn2			Mdga2	Lnpk														Zfp90		Stard9															Zfp1			Rnf165				Rab8b	Maged2	Papln		Lrp5	Cep89		P3h1
Upf2			Mef2c	Lrch2														Zkscan3		Stx8															Zfp608			Robo3				Rad54l2	Maneal	Paqr6		Lrrc27	Cerk		P4ha2
Uri1			Megf9	Lrif1																Sulf1															Zkscan7			Ror1				Rapgef2	Mcur1	Pcsk1n		Lrrc8d	Cers1		Pan2
Vps13a			Mfsd4	Lrrtm2																Susd1															Zmynd11			Ror2				Rasl11a	Mdp1	Pcsk9		Lrrn2	Cfap45		Pard3
Wasf1			Mkx	Lztfl1																Syne1																		RP23-109A22.2				Rasl12	Mettl2	Pdcd2l		Ltbp3	Chaf1a		Pbx4
Xrn1			Mmp16	Mal2																Taf3																		RP23-375N21.5				Rbm12b1	Mettl9	Pdcd5		Lzts1	Chd8		Pcbd2
Ylpm1			Mphosph8	Mampt																Tasp1																		RP23-92G13.7				Rcsd1	Mex3c	Pfkfb2		Mamdc4	Chid1		Pcgf2
Zc3h13			Mycbp2	Map7d2																Tead1																		Rps6kc1				Rest	Mfsd1	Pgls		Man2c1	Chst3		Pde4dip
Zcchc7			Mylk3	Mapk8																Tmem117																		Rrbp1				Rev1	Minpp1	Pgrmc1		Map3k4	Ciapin1		Pdia5
Zfp182			Myo1b	Mapk9																Tmem132b																		Rubcnl				Rexo2	Mob1a	Phlda3		Mapk1ip1	Cisd3		Pdzd2
Zfp53			Myo5a	March7																Tnr																		Sash1				Riok3	Mob3c	Pigg		Mapk4	Clcn2		Pear1
Zfp697			Myo9a	Mastl																Tnrc6b																		Sdk2				Ripply2	Morf4l1	Pigyl		Mapkbp1	Clcn7		Peli2
			Mypn	Med13																Trpm4																		Serac1				Rnd3	Mpp4	Plvap		March4	Clk3		Pgbd1
			Naaladl2	Med14																Ttc13																		Sergef				Rnf19a	Mpzl2	Polr2f		Mast3	Cln3		Phf12
			Nav3	Mfap3l																Ttc8																		Setdb1				RP23-242O9.1	Mrfap1	Ppa1		Mau2	Cln6		Pitpnm3
			Nbea	Mga																Ttll11																		Sez6l				RP23-35F19.3	Mrgbp	Ppt2		Mfsd11	Cmklr1		Pkd1
			Ncam2	Micu3																Ubr5																		Sfpq				RP24-87I22.3	Mrpl34	Psd4		Micu1	Cmtm6		Plcg2
			Ncoa7	Mios																Unc79																		Sh3pxd2b				Rpia	Mrpl40	Psma1		Mink1	Cmtm7		Plekhm1
			Ncor1	Mob1b																Upp2																		Sh3rf1				Rrp8	Mrpl51	Psma7		Mkl1	Cnnm4		Polr3a
			Nemf	Mphosph10																Usp24																		Sipa1l1				Rsad2	Mrps26	Psmd5		Mlxipl	Cnot3		Pomt1
			Nfatc3	Mplkip																Utrn																		Slc22a14				Rybp	Mrps31	Psmd6		Mpp3	Cnppd1		Ppfia1
			Nln	Mpv17l																Vti1a																		Slc24a4				S100a6	Msantd4	Psmg4		Mroh1	Cntn2		Ppp1r12b
			Nol4	Mrpl1																Wwox																		Slc35d1				Sema3b	Mtch2	Ptrhd1		Mtor	Coa7		Prag1
			Npnt	Mrpl32																Xkr6																		Slc6a7				Senp2	Mtx3	Pxmp2		Mtss1	Cog4		Prdm15
			Nrcam	Msmo1																Xylt1																		Slc7a6				Senp5	Naa20	Rab29		Mvb12b	Col16a1		Prima1
			Nrep	Mtdh																Yeats2																		Slco3a1				Serpinf1	Ndc1	Rab33b		Myo1e	Col5a3		Prmt3
			Nrg3	Mterf1a																Zdhhc14																		Smurf1				Serping1	Ndufa5	Rab3a		Myrf	Col8a2		Proser1
			Nrxn1	Mtmr2																Zfand3																		Snapc4				Setd3	Ndufb2	Rabac1		Nat10	Col9a2		Psen1
			Nwd2	Mtpn																Zfp609																		Snd1				Sfswap	Neu1	Racgap1		Ncan	Colgalt1		Ptpn14
			Nxph2	Mtx2																Zfp704																		Sned1				Sgpl1	Nfatc2ip	Rasip1		Nckap1l	Comt		Pum1
			Nyap2	Mybl1																Zfp961																		Snx30				Siah1a	Ngrn	Rasl10a		Ncor2	Coro1a		Rab40c
			Ofd1	Myh3																Zfyve28																		Sorbs1				Six5	Nog	Rbm43		Ndst2	Coro2b		Rai1
			Olfr690	Mzt1																Znrf3																		Spag5				Skp2	Nop56	Rdh14		Nek9	Cpe		Rapgef1
			Opn3	Naa30																																		Spred2				Slc13a4	Nt5c	Rell2		Neurl4	Cpm		Rasa3
			Orc2	Nae1																																		Sptan1				Slc16a1	Ntan1	Rer1		Nfatc2	Cpne6		Rasa4
			Ovgp1	Ncl																																		Srbd1				Slc26a7	Nudt21	RP23-189L19.6		Nisch	Cpsf7		Rassf8
			Pak3	Necab1																																		Srgap3				Slc47a1	Nudt5	RP23-189N15.6		Nos3	Cpt1a		Rbfox2
			Pak7	Nek7																																		Srl				Slc6a20a	Nup54	RP23-363M8.1		Notch1	Crat		Rcor2
			Pamr1	Neurod6																																		Srrm2				Slc7a11	Omd	RP23-375N21.2		Notch3	Crb2		Rgl1
			Papd4	Nipa1																																		St3gal3				Slc7a2	Osbpl11	RP23-37J21.3		Nova2	Crcp		Rin3
			Parm1	Nipbl																																		St5				Smad1	Oxld1	RP23-462F3.3		Nprl3	Creb3l2		Rnf182
			Pcdh20	Nmd3																																		Stac3				Smoc1	Pafah1b2	RP24-175N4.1		Nrf1	Crebl2		Rnf213
			Pcdh7	Npat																																		Susd6				Snupn	Pak2	RP24-478I22.6		Nsun7	Crip1		Rnf216
			Pcdh9	Nr3c1																																		Syn2				Snx9	Parp12	Rpl12		Ntng2	Crip3		RP23-103I12.4
			Pclo	Nr4a2																																		Tango2				Socs3	Pcyox1	Rpl36		Numa1	Crlf3		RP23-139J18.1
			Pcsk2	Nsun3																																		Tbc1d2				Spag1	Pde6d	Rprml		Nup210	Crnkl1		RP23-140D14.19
			Pde1a	Ocrl																																		Tbcd				Sppl3	Pdhx	Rps10		Nup214	Crtap		RP23-259C9.1
			Pde3b	Ola1																																		Tcf7l1				Ssfa2	Pdlim5	Rps13		Nwd1	Cry2		RP23-316M14.6
			Pgr	Opalin																																		Tcf7l2				Sspn	Pgam5	Rsph3b		Oasl2	Cs		RP23-339H11.2
			Phf14	Optn																																		Tecpr2				St3gal4	Phf23	Rxfp3		Osbpl7	Csad		RP23-349I9.6
			Pkib	Orc4																																		Terf2				Star	Pigh	Sac3d1		Otof	Csnk1d		RP23-391A14.5
			Pkn2	Osgepl1																																		Tmem145				Stau1	Pithd1	Sap30		P2ry6	Csrnp2		RP24-191L21.3
			Plcl2	Papolg																																		Tmem173				Stom	Plekha4	Sec61b		Pacs2	Ctgf		Rptor
			Pls1	Pcm1																																		Tmem39a				Ston1	Plk5	Serpinb6b		Pacsin2	Cthrc1		Rreb1
			Plxdc2	Pcmtd1																																		Tmem63c				Susd2	Pllp	Sf3b5		Parp11	Ctns		Rrp15
			Ppm1k	Pdcd10																																		Tnfrsf19				Suv420h1	Plscr1	Sh3tc1		Parp3	Ctps		Rtel1
			Ppp1r12a	Pex3																																		Tnrc6a				Svep1	Poc5	Slc11a1		Parvb	Ctsh		Ryk
			Ppp2r3a	Pex7																																		Tnrc6c				Syk	Poldip2	Slc12a6		Pask	Cttn		Safb2
			Prkaa2	Pgm2l1																																		Traf3ip1				Syne2	Polr1d	Slc27a3		Pcdh1	Cuedc1		Samhd1
			Prkg2	Phf10																																		Trim68				Taf1a	Polr3d	Slc35e4		Pcnt	Cwc25		Sart1
			Prpf39	Phf20l1																																		Trim9				Taf2	Ppm1a	Smdt1		Pcnx	Cxcl12		Scaf4
			Pter	Phip																																		Tspan14				Tbx15	Ppp1r13l	Snrpc		Pcsk6	Cyb561d1		Sec1
			Ptprd	Picalm																																		Ttc28				Tbx2	Ppp1r14a	Sod2		Pcx	Cyb5d1		Sema4d
			Purg	Pigb																																		Ttc7b				Tcp11l2	Ppp1r1a	Soga3		Pde4a	Cyfip1		Setd4
			Pvrl3	Pnpla8																																		Ttll4				Tfcp2	Ppp1r3g	Sp9		Pelp1	Cyhr1		Sh3pxd2a
			Qser1	Pnpt1																																		Ttll8				Thbs2	Ppp2r5a	Spc24		Phc2	Cyp26b1		Shank2
			R3hdm1	Polk																																		Ubac2				Tinf2	Ppp2r5c	Spint2		Piezo1	Cys1		Shc3
			Rabgap1	Ppip5k2																																		Ubash3b				Tlr4	Prkab1	Spr		Pigo	Cyth2		Shkbp1
			Rabgap1l	Ppp3cb																																		Ucp3				Tm7sf2	Prob1	Srcap		Plcd4	D2hgdh		Shq1
			Rad51ap2	Ppp4r3b																																		Ulk4				Tmem132c	Ptgis	Srp9		Plekha7	Dagla		Shroom3
			Ralgapa1	Prex2																																		Ushbp1				Tmtc4	Ptgr2	Ss18l2		Plekhn1	Dand5		Slc12a7
			Ralyl	Prkci																																		Vopp1				Tnfrsf11b	Pts	Sst		Plod1	Dap		Slc39a11
			Rapgef6	Prpf38b																																		Vps13d				Tnip2	Pygo1	Sstr1		Plxna3	Dbndd1		Smad6
			Rars2	Prpf40a																																		Vwf				Trim12a	Qrsl1	Stmn3		Plxnb1	Dcaf11		Specc1l
			Rasal2	Prps2																																		Wdfy2				Trim26	R3hcc1	Tada2b		Pmepa1	Dcaf15		Spen
			Rb1cc1	Psd3																																		Wdr66				Trim30d	Rab21	Terf2ip		Pmm2	Dcaf4		Spg11
			Rbm25	Psmc6																																		Wdr70				Trim65	Rad1	Thnsl2		Pnpla7	Dctn6		Srrm3
			Rbm26	Psme4																																		Wnt5b				Trp53bp2	Ralb	Thoc3		Podxl	Ddit4		Srsf4
			Rbm41	Ptbp2																																		Ybx2				Trpm3	Ralbp1	Tkfc		Pofut1	Ddrgk1		Ssbp3
			Rfwd2	Pten																																		Zbtb7c				Trpm6	Rap2c	Tle1		Pomt2	Ddx20		St6gal1
			Rims1	Ptn																																		Zbtb8a				Ttf1	Rasl11b	Tm2d1		Ppcdc	Ddx47		St8sia5
			Rims2	Ptpn4																																		Zfp462				Txn1	Rbm15	Tmem121		Ppfia4	Ddx56		Stat2
			Ripk2	Rab2a																																		Zfp808				Txndc11	Rbm18	Tmem151a		Ppfibp2	Dennd4b		Steap3
			Rnf217	Rab6a																																		Zfp827				Uaca	Rbm24	Tmem170		Ppp6r1	Des		Stk38
			Robo2	Rabep1																																						Ube2h	Rbm34	Tmem185b		Prdm11	Desi1		Strada
			Rock1	Ranbp2																																						Ubn1	Rbm45	Tmem191c		Prdm16	Dgat1		Stx18
			Rorb	Rasa1																																						Ugdh	Rbmxl1	Tmem240		Prex1	Dgkd		Stx2
			RP23-147K15.4	Rbbp8																																						Usp48	Rbx1	Tmem255b		Prpf40b	Dhdds		Sufu
			RP23-156C20.1	Rbm11																																						Utp14a	Reep5	Tmem259		Ptchd2	Dhrs7b		Susd4
			RP23-174M24.1	Rbm27																																						Wdr20	Rgs16	Tmem70		Ptprf	Dhx16		Svil
			RP23-198N22.1	Reps2																																						Wnk4	Rhoa	Tmem87b		Rab11fip3	Dhx38		Synpo2
			RP23-211P15.1	Rfx7																																						Wnt4	Rhot1	Tpgs1		Rab3b	Dhx8		Syt17
			RP23-243E17.1	Rif1																																						Xrcc6bp1	Rnf14	Tpst2		Rabep2	Dio2		Szt2
			RP23-2A21.1	Rlf																																						Yy1	Rnf149	Trappc5		Rad9b	Dip2a		Taf4
			RP23-314A12.1	Rnf115																																						Zadh2	Rnmt	Trim47		Radil	Dirc2		Tango6
			RP23-330D3.3	Rnf130																																						Zfp369	RP23-144K18.5	Trmt112		Rapgef3	Dixdc1		Tbc1d14
			RP23-330D3.6	Rnpc3																																						Zfp395	RP23-153M14.8	Trmt44		Rdh13	Dkk3		Tbc1d22a
			RP23-331E5.5	Rock2																																						Zfp652	RP23-162H6.1	Trub1		Recql5	Dlg3		Tbc1d4
			RP23-355G16.1	RP23-147O14.2																																						Zfp664	RP23-204N19.8	Ubxn2b		Rfng	Dmtn		Tbcel
			RP23-360A2.8	RP23-17C12.7																																						Zfp866	RP23-313J14.5	Ubxn6		Rfx1	Dnajb5		Tep1
			RP23-390N24.1	RP23-200C3.1																																						Zscan29	RP23-342N3.3	Uchl1		Rgp1	Dnajc11		Tet3
			RP23-396C19.4	RP23-208E23.3																																						Zswim3	RP23-345H24.2	Unc50		Rhoc	Dnase1l3		Tgfbr3
			RP23-396N4.2	RP23-214L4.1																																							RP23-347F4.1	Uqcrfs1		Rnaset2a	Dnttip1		Tle2
			RP23-83O23.5	RP23-218L17.1																																							RP23-354M9.1	Vav1		Rnf123	Dpf2		Tmcc3
			RP24-100C12.5	RP23-26N21.1																																							RP23-94B13.9	Vimp		Rnf157	Dph2		Tmem110
			RP24-122D14.1	RP23-316L10.3																																							RP24-100B13.1	Vti1b		Rnh1	Dph3		Tmem194
			RP24-134N2.1	RP23-331A21.2																																							RP24-297N9.8	Wdr47		RP23-273D6.2	Dpp3		Tmem260
			RP24-177J9.4	RP23-332K10.1																																							RP24-482A24.5	Wfdc3		RP23-308N2.9	Drc3		Tmem51
			RP24-490H13.2	RP23-343E20.2																																							Rpl18a	Xrcc3		RP23-37G19.2	Drosha		Tns3
			RP24-63F2.2	RP23-35L3.1																																							Rpl35	Ydjc		RP24-104I20.2	Dtx2		Tpcn2
			RP24-87L14.1	RP23-39I7.3																																							Rpp25	Yeats4		RP24-159I1.1	Dus2		Traf3
			Rps6ka3	RP23-55L3.5																																							Rps19bp1	Yjefn3		Rpl35a	Dusp3		Trafd1
			Rps6kb1	RP23-90C6.3																																							Rps2	Zc3h15		Rps6ka2	Dynlt1a		Tram2
			Rsrc1	RP23-96I9.2																																							Rps24	Zfp251		Rubcn	Dzank1		Trim25
			Rundc3b	RP24-179D17.1																																							Rps25	Zfp275		Ryr1	E2f4		Trio
			Rxfp1	RP24-406I15.2																																							Rps6ka4	Zfp593		Saal1	Eaf1		Tsc1
			Rxfp2	RP24-408B13.1																																							Rrm1	Zfp622		Sbf1	Ebna1bp2		Tsen2
			Scai	RP24-562O19.3																																							Rrs1	Zfp64		Scap	Ebp		Tssc1
			Scaper	RP24-63F2.1																																							Rwdd2b	Zfp647		Scarb1	Ebpl		Tubgcp6
			Sclt1	Rpgrip1l																																							Rwdd4a	Zfp689		Scml4	Echdc2		Tyk2
			Scn2a1	Rpl21																																							Saysd1	Zfp787		Sec16a	Efnb1		Ube2cbp
			Setd2	Rpp30																																							Scand1	Znhit2		Sec24c	Efr3b		Ube4b
			Setd5	Rspo3																																							Scarb2			Serinc5	Eftud2		Ubr2
			Sgcz	Rtf1																																							Scarf2			Setd1b	Eif2b4		Unkl
			Simc1	Rtn4																																							Sdcbp			Sf3a1	Eif4a1		Usp35
			Six6os1	Rwdd1																																							Sephs2			Sfi1	Eif4e2		Utp20
			Skap2	Sacs																																							Sept1			Sgsm2	Eif4g2		Vav2
			Slc16a7	Saxo2																																							Serp1			Sh3bp4	Elac2		Vcl
			Slc24a2	Scel																																							Sertad1			Shc4	Elk3		Vill
			Smc3	Scg3																																							Sh2b2			Shisa7	Elmsan1		Vprbp
			Smc5	Sec62																																							Shd			Sik3	Eln		Vps53
			Sntg1	Sec63																																							Shisa2			Sil1	Elof1		Vsig2
			Sorbs2	Sema3a																																							Slc2a12			Sipa1l2	Elovl1		Wdr90
			Sos1	Senp6																																							Slc35g1			Sipa1l3	Elovl2		Wdr95
			Spag6l	Sept6																																							Slc36a4			Ski	Elp2		Wfikkn2
			Spata7	Serinc1																																							Slc4a1ap			Skiv2l	Elp3		Wnk2
			Spdya	Serpini1																																							Slc7a6os			Slc11a2	Emc3		Wwc1
			Sphkap	Sgtb																																							Smim4			Slc16a14	Emilin1		Wwtr1
			Srgn	Sh3glb1																																							Snrnp27			Slc22a27	Eml3		Xpo6
			Srp54c	Sh3yl1																																							Snrpa1			Slc25a13	Emp1		Zbtb16
			St18	Shoc2																																							Snx21			Slc25a42	Enthd2		Zc3h3
			St6gal2	Shprh																																							Snx5			Slc36a1	Entpd5		Zfp532
			Stat4	Slc16a4																																							Snx6			Slc39a7	Entpd7		Zfp592
			Stau2	Slc25a46																																							Spg20			Slc43a2	Ephb4		Zfp773
			Stx17	Slc44a1																																							Sphk1			Slc4a8	Ephb6		Zfyve1
			Stxbp5	Slc4a10																																							Spp1			Slc6a6	Ephx1		Zhx2
			Stxbp5l	Slf1																																							Spsb4			Slc9a1	Eps8l2		Zmynd8
			Suv39h2	Slitrk2																																							Srsf1			Slc9a5	Erbb2		Zzef1
			Syn1	Slitrk4																																							Srsf2			Slc9a8	Ercc3
			Syt1	Sltm																																							Srsf6			Smg9	Esam
			Sytl2	Smc1a																																							Ssr1			Socs7	Esrrb
			Tab3	Smc2																																							Stat1			Sox13	Exd1
			Tanc2	Smc4																																							Stoml2			Spock2	Exosc2
			Tbc1d32	Smc6																																							Sub1			Sptb	Ext2
			Tbc1d5	Smim10l1																																							Svbp			Ssc5d	Extl1
			Tet2	Snrpb2																																							Syde2			Stim1	Extl3
			Thoc1	Snrpd1																																							Tacc1			Stk36	F13a1
			Tlk1	Snx13																																							Tacc3			Stxbp2	F3
			Tlk2	Snx2																																							Taco1			Syngap1	Fa2h
			Tmeff2	Sp4																																							Taf13			Syt7	Fads3
			Tmem196	Spata6																																							Tapt1			Syvn1	Fam114a2
			Trhde	Spopl																																							Tatdn1			Tab1	Fam134c
			Uggt2	Srsf12																																							Tdg			Tbc1d8	Fam151b
			Unc5c	Ssx2ip																																							Tfam			Tbxas1	Fam160b1
			Unc5d	Stag2																																							Tfr2			Tcerg1l	Fam162a
			Unc80	Strn3																																							Tgfb1			Tekt1	Fam168b
			Usf3	Sucla2																																							Tgfb1i1			Telo2	Fam174b
			Usp15	Sycp2																																							Tha1			Tfip11	Fam188b2
			Usp34	Tab2																																							Thap11			Thsd4	Fam192a
			Usp43	Taf4b																																							Thoc7			Tiam2	Fam212a
			Vegfc	Taok1																																							Thumpd1			Tll2	Fam212b
			Vmn2r84	Tcerg1																																							Tifab			Tln1	Fam220a
			Vmn2r85	Tdrd3																																							Timm21			Tln2	Fam234b
			Vmn2r86	Terf1																																							Timm23			Tmc4	Fam73b
			Vmn2r87	Tex10																																							Tma7			Tmco4	Fam78a
			Vps13b	Tfrc																																							Tmem128			Tmem104	Farsa
			Vrk2	Tgs1																																							Tmem183a			Tmem116	Fastkd3
			Vwa3a	Thoc2																																							Tmem19			Tmem150c	Fbln1
			Zcchc16	Tm9sf3																																							Tmem200c			Tns1	Fbln7
			Zcchc2	Tmem167																																							Tmem242			Tom1l2	Fbxl2
			Zfp318	Tmem30a																																							Tmem33			Tox2	Fbxo10
			Zfp40	Tmem5																																							Tmem50a			Tpra1	Fbxo18
			Zfp81	Tmx3																																							Tmem55a			Trank1	Fbxo38
			Zfp935	Top2b																																							Tmem59			Trappc9	Fbxo46
			Zfp942	Tpp2																																							Tomm20			Trim14	Fbxo7
			Zfp950	Trim33																																							Tomm22			Trim17	Fbxw8
			Zkscan16	Trpc1																																							Tor1aip1			Trim41	Fcf1
			ZNF654	Tsc22d2																																							Trappc8			Trim46	Fcgr2b
			Zufsp	Ttc14																																							Trim27			Tspan18	Fdxacb1
				Ttc19																																							Trip6			Ttc38	Fdxr
				Ttc3																																							Trmt10a			Ttc39c	Fermt3
				Ttll7																																							Tsacc			Ttc41	Fgd2
				Ttr																																							Tspo			Ttc5	Fgfbp3
				Ube2g1																																							Tspyl1			Tulp3	Fibin
				Ube3a																																							Ttbk2			Tyro3	Fibp
				Ubr3																																							Ttc32			Uba7	Fkbp9
				Uchl5																																							Tubgcp5			Ubr4	Flna
				Ufsp2																																							Tvp23b			Ufd1l	Fmnl1
				Usp1																																							Twsg1			Ulk3	Fn3k
				Usp32																																							Txndc12			Unc45a	Fntb
				Usp8																																							Txndc15			Urb1	Foxred1
				Usp9x																																							Txnip			Usp20	Ftsj3
				Vgll3																																							Tyms			Vac14	Fut10
				Vma21																																							Ube2a			Vps18	Fv1
				Vps26a																																							Ube2j2			Wasf3	Fxn
				Vps41																																							Ubxn1			Wdfy3	Fzd4
				Wac																																							Uhrf2			Wdr25	Gak
				Wapl																																							Usp12			Whrn	Galnt15
				Wasl																																							Usp42			Wipf3	Galnt9
				Wdr26																																							Utp15			Wscd2	Gars
				Wdr44																																							Utp18			Ypel2	Gart
				Wls																																							Vash1			Zbtb48	Gas6
				Wwp1																																							Vash2			Zdhhc7	Gatsl2
				Xrn2																																							Vdac3			Zfhx2	Gba2
				Ythdc2																																							Wdfy1			Zfp142	Gbgt1
				Zc2hc1a																																							Wdr36			Zfp362	Gcc1
				Zc3h14																																							Wdr53			Zfp423	Gcdh
				Zcchc11																																							Wdsub1			Zfp521	Gfap
				Zdhhc2																																							Wee1			Zfp536	Ggcx
				Zfand5																																							Wrnip1			Zfp618	Ggt7
				Zfml																																							Xrcc2			Zfp831	Ghdc
				Zfp120																																							Xrra1			Zfyve26	Gimap8
				Zfp131																																							Yars2			Zhx3	Gja1
				Zfp148																																							Ypel1			Zmiz1	Gjb6
				Zfp157																																							Ythdf2			Zmym3	Gle1
				Zfp160																																							Zbtb14				Glg1
				Zfp260																																							Zbtb7b				Glis2
				Zfp273																																							Zbtb8b				Glmp
				Zfp280c																																							Zbtb8os				Glt8d1
				Zfp280d																																							Zc3h11a				Glul
				Zfp292																																							Zcchc8				Gnb1
				Zfp322a																																							Zdhhc6				Gnb1l
				Zfp354a																																							Zfp109				Gns
				Zfp354c																																							Zfp111				Gosr1
				Zfp37																																							Zfp317				Gpank1
				Zfp386																																							Zfp329				Gpat4
				Zfp442																																							Zfp36l2				Gpd2
				Zfp458																																							Zfp553				Gpn1
				Zfp51																																							Zfp597				Gpr180
				Zfp52																																							Zfp619				Gpr89
				Zfp595																																							Zfp623				Gprin1
				Zfp605																																							Zfp688				Gpt
				Zfp606																																							Zfp746				Gramd2
				Zfp65																																							Zfp799				Grap
				Zfp712																																							Zfp830				Grasp
				Zfp72																																							Zfp93				Grin1
				Zfp729b																																							Zfp952				Grk6
				Zfp738																																							Zfp954				Grn
				Zfp748																																							Zkscan14				Grtp1
				Zfp770																																							Zmynd10				Gsg1l
				Zfp788																																											Gsn
				Zfp800																																											Gss
				Zfp846																																											Gstk1
				Zfp85																																											Gstm2
				Zfp933																																											Gstm4
				Zfp943																																											Gtf2ird2
				Zfp945																																											Gtf3c4
				Zfp948																																											Gtf3c5
				Zfp955a																																											Gtpbp2
				Zfp958																																											H2-Aa
				Zfpm2																																											H2-Eb1
				Zfr																																											Hars
				Zfyve9																																											Hba-a2
				Zgrf1																																											Hdac10
				Zmym2																																											Hdac3
																																															Hddc2
																																															Hdlbp
																																															Heatr1
																																															Hectd3
																																															Hepacam
																																															Hic2
																																															Hif1an
																																															Higd1b
																																															Hinfp
																																															Hist1h2be
																																															Hjurp
																																															Hk3
																																															Hmgxb3
																																															Hmox2
																																															Hnrnpa1
																																															Hnrnpl
																																															Hnrnpul1
																																															Hnrnpul2
																																															Hp1bp3
																																															Hps4
																																															Hr
																																															Hs1bp3
																																															Iars2
																																															Ibtk
																																															Icmt
																																															Ict1
																																															Ier3ip1
																																															Iffo2
																																															Ifi35
																																															Ift122
																																															Ift172
																																															Igf2r
																																															Igfbp2
																																															Igfbp4
																																															Iglon5
																																															Ikbkap
																																															Ikzf4
																																															Il10ra
																																															Il11ra1
																																															Il17ra
																																															Il21r
																																															Il34
																																															Il4ra
																																															Ilf3
																																															Impdh2
																																															Impg2
																																															Ino80e
																																															Inpp4a
																																															Inpp5e
																																															Inpp5k
																																															Inppl1
																																															Insm1
																																															Ints3
																																															Ipo13
																																															Ipo5
																																															Ipo9
																																															Irak2
																																															Irf1
																																															Islr
																																															Itga10
																																															Itga11
																																															Itpkc
																																															Jade1
																																															Jade2
																																															Jdp2
																																															Jmjd6
																																															Kank2
																																															Kank4
																																															Kansl2
																																															Kansl3
																																															Kat2a
																																															Kbtbd2
																																															Kcnc3
																																															Kcnh4
																																															Kcnip2
																																															Kcnip3
																																															Kcnk3
																																															Kcnq2
																																															Kctd20
																																															Kctd21
																																															Kctd3
																																															Kctd5
																																															Kdm4a
																																															Kdm4b
																																															Khnyn
																																															Kif21b
																																															Kif3b
																																															Klhl18
																																															Klhl8
																																															Kndc1
																																															Krt77
																																															L3mbtl2
																																															L3mbtl3
																																															Lars
																																															Lbr
																																															Lct
																																															Ldah
																																															Leng1
																																															Leng9
																																															Letm1
																																															Letmd1
																																															Lgals1
																																															Lgmn
																																															Limd1
																																															Limk2
																																															Lims2
																																															Lin37
																																															Lix1l
																																															Llph
																																															Lmnb1
																																															Lonp1
																																															Lonp2
																																															Loxl3
																																															Lpcat3
																																															Lpin1
																																															Lrp4
																																															Lrrc20
																																															Lrsam1
																																															Lrtm2
																																															Lsm11
																																															Lsm14a
																																															Lsr
																																															Lss
																																															Mad2l1bp
																																															Madd
																																															Maml1
																																															Man2b1
																																															Manbal
																																															Map3k9
																																															Map4k2
																																															Mapk11
																																															Mapkapk2
																																															Mapt
																																															Marc2
																																															March2
																																															March8
																																															Mars
																																															Mast1
																																															Mbd1
																																															Mcm7
																																															Mcmbp
																																															Me2
																																															Med4
																																															Med6
																																															Mef2d
																																															Metrnl
																																															Mettl16
																																															Mettl7a1
																																															Mgea5
																																															Mgll
																																															Midn
																																															Mien1
																																															Miip
																																															Mknk1
																																															Mkrn1
																																															Mlx
																																															Mmaa
																																															Mmab
																																															Mmp17
																																															Mogs
																																															Mok
																																															Mpi
																																															Mpped1
																																															Mrc2
																																															Mrpl18
																																															Mrpl23
																																															Mrps21
																																															Mrrf
																																															Msi1
																																															Msl1
																																															Mta2
																																															Mterf4
																																															Mtf1
																																															Mtfp1
																																															Mthfr
																																															Mthfsd
																																															Mtmr14
																																															Mtmr4
																																															Mtrr
																																															Mtus1
																																															Mxi1
																																															Mxra7
																																															Mxra8
																																															Mycbpap
																																															Myh9
																																															Myl9
																																															Myo18a
																																															Myo1h
																																															Myo7a
																																															Myoc
																																															N4bp1
																																															Naa25
																																															Naa35
																																															Naa38
																																															Nadk2
																																															Nat9
																																															Ncaph2
																																															Ncf1
																																															Ncoa4
																																															Ncstn
																																															Ndufaf7
																																															Necab3
																																															Nectin1
																																															Nek6
																																															Nek8
																																															Nelfa
																																															Nelfb
																																															Neu4
																																															Nfix
																																															Nfkb2
																																															Nfkbia
																																															Nfkbie
																																															Ngdn
																																															Nipal4
																																															Nkd2
																																															Nme4
																																															Nmnat1
																																															Noc2l
																																															Nop16
																																															Nop2
																																															Npc1
																																															Nploc4
																																															Nptx1
																																															Nr1h3
																																															Nr4a1
																																															Nras
																																															Nrbp2
																																															Nubp1
																																															Nudt3
																																															Nudt9
																																															Nup133
																																															Nup188
																																															Nutf2
																																															Nxn
																																															Oaf
																																															Obscn
																																															Ocel1
																																															Ogfod1
																																															Olfml2a
																																															Olfml2b
																																															Opa3
																																															Oprl1
																																															Osbpl5
																																															Oscar
																																															Otub2
																																															Otud1
																																															Padi2
																																															Pafah2
																																															Pald1
																																															Papd7
																																															Paqr5
																																															Paqr7
																																															Parl
																																															Parp1
																																															Parp10
																																															Parp9
																																															Pbld2
																																															Pbxip1
																																															Pck2
																																															Pcolce
																																															Pdcl
																																															Pdcl3
																																															Pddc1
																																															Pdgfb
																																															Pdgfra
																																															Pdlim1
																																															Pdp2
																																															Pdpr
																																															Pecam1
																																															Pepd
																																															Per1
																																															Per2
																																															Perp
																																															Pes1
																																															Pex1
																																															Pex16
																																															Pex19
																																															Pfkfb3
																																															Pfkm
																																															Pfkp
																																															Pgbd5
																																															Pgf
																																															Phf20
																																															Phf5a
																																															Phkg2
																																															Phrf1
																																															Pik3ip1
																																															Pik3r5
																																															Pitpnb
																																															Pla2g15
																																															Pla2g5
																																															Plcg1
																																															Plekha3
																																															Plekhf1
																																															Plekhf2
																																															Plekhg2
																																															Plekhg5
																																															Plk2
																																															Plxna1
																																															Plxnd1
																																															Pmm1
																																															Pmpca
																																															Pnkp
																																															Pnpla6
																																															Pogk
																																															Pole
																																															Polr1a
																																															Polr1b
																																															Polr1e
																																															Polr2h
																																															Polr3e
																																															Pomk
																																															Ppil1
																																															Ppil2
																																															Ppm1f
																																															Ppm1m
																																															Ppox
																																															Ppp1r13b
																																															Ppp1r26
																																															Ppp1r3c
																																															Ppp2cb
																																															Ppp2r1b
																																															Ppp6r2
																																															Pprc1
																																															Pqlc2
																																															Prdm2
																																															Prdx2
																																															Prdx6
																																															Preb
																																															Prelp
																																															Prep
																																															Prkd2
																																															Prkrip1
																																															Prpf4
																																															Prpsap1
																																															Prr3
																																															Psen2
																																															Psma3
																																															Ptcd1
																																															Ptgds
																																															Ptgfrn
																																															Ptgs1
																																															Ptk2b
																																															Ptk7
																																															Ptms
																																															Ptpn11
																																															Pus1
																																															Pusl1
																																															Pvr
																																															Pwp2
																																															Pygm
																																															Qars
																																															Rab11fip1
																																															Rab11fip4
																																															Rab11fip5
																																															Rab13
																																															Rab23
																																															Rab24
																																															Rab31
																																															Rab3gap2
																																															Rabepk
																																															Ranbp10
																																															Ranbp3
																																															Rangap1
																																															Rap1gap2
																																															Rap2a
																																															Rapgefl1
																																															Rara
																																															Rassf2
																																															Rbbp5
																																															Rbm19
																																															Rbm28
																																															Rbm8a
																																															Rbmx
																																															Renbp
																																															Rexo4
																																															Rfc2
																																															Rfxank
																																															Rgmb
																																															Rhno1
																																															Rhobtb2
																																															Rhpn2
																																															Rilpl1
																																															Rims3
																																															Rims4
																																															Rin2
																																															Rnd1
																																															Rnf10
																																															Rnf103
																																															Rnf112
																																															Rnf121
																																															Rnf145
																																															Rnf185
																																															Rnf207
																																															Rnf220
																																															Rnf5
																																															Rnpep
																																															RP23-123N23.5
																																															RP23-180L12.1
																																															RP23-221O14.1
																																															RP23-256L12.2
																																															RP23-268N22.1
																																															RP23-311C19.1
																																															RP23-344D2.9
																																															RP23-349B15.4
																																															RP23-3M10.9
																																															RP23-419P16.7
																																															RP23-419P16.9
																																															RP23-60P18.9
																																															RP23-70J9.6
																																															RP23-83N17.1
																																															RP23-89C10.1
																																															RP23-9L16.5
																																															Rpap3
																																															Rpl13a
																																															Rpl28
																																															Rpl7l1
																																															Rpp14
																																															Rps3a1
																																															Rps6kb2
																																															Rpusd4
																																															Rrnad1
																																															Rtfdc1
																																															Rtn4r
																																															Rtn4rl1
																																															Rtn4rl2
																																															Rundc1
																																															S100a13
																																															Sae1
																																															Sap30bp
																																															Sart3
																																															Sat1
																																															Scamp2
																																															Scamp4
																																															Sdccag3
																																															Sde2
																																															Sebox
																																															Sec14l2
																																															Selo
																																															Sema4a
																																															Sema4c
																																															Sema7a
																																															Sepn1
																																															Sept9
																																															Serf2
																																															Serhl
																																															Serinc3
																																															Serpind1
																																															Setd7
																																															Sf3b1
																																															Sf3b2
																																															Sf3b3
																																															Sfmbt2
																																															Sfxn3
																																															Sgf29
																																															Sgk1
																																															Sgsm3
																																															Sh3bgrl3
																																															Sh3bp5
																																															Sh3tc2
																																															Shc1
																																															Shc2
																																															Shisa5
																																															Shroom1
																																															Sigmar1
																																															Sik1
																																															Sirt4
																																															Sirt6
																																															Slc12a5
																																															Slc13a3
																																															Slc15a2
																																															Slc15a4
																																															Slc16a13
																																															Slc20a1
																																															Slc22a6
																																															Slc23a2
																																															Slc25a20
																																															Slc25a44
																																															Slc26a10
																																															Slc26a11
																																															Slc29a2
																																															Slc31a2
																																															Slc35b2
																																															Slc35e3
																																															Slc37a3
																																															Slc37a4
																																															Slc38a2
																																															Slc39a2
																																															Slc45a4
																																															Slc52a2
																																															Slc6a12
																																															Slc6a13
																																															Slc6a8
																																															Slc6a9
																																															Slc7a1
																																															Slc7a5
																																															Slc8b1
																																															Slc9a2
																																															Slco2a1
																																															Slco2b1
																																															Slco4a1
																																															Slx4
																																															Smad3
																																															Smad7
																																															Smarcd2
																																															Smg5
																																															Smim7
																																															Smpd4
																																															Smtn
																																															Sncb
																																															Snf8
																																															Snip1
																																															Snn
																																															Snrnp35
																																															Snw1
																																															Snx19
																																															Snx32
																																															Snx33
																																															Socs5
																																															Sorbs3
																																															Sorl1
																																															Sort1
																																															Sox8
																																															Spag7
																																															Spata2l
																																															Spns2
																																															Spsb1
																																															Srsf3
																																															Srxn1
																																															Ss18l1
																																															Sspo
																																															Ssrp1
																																															Sstr3
																																															St3gal1
																																															Stab1
																																															Stac2
																																															Stard13
																																															Stard3
																																															Stard7
																																															Stard8
																																															Stat6
																																															Stc1
																																															Stc2
																																															Stk11ip
																																															Stk32c
																																															Stk35
																																															Stk4
																																															Strn4
																																															Stx4a
																																															Stx5a
																																															Stx6
																																															Suclg1
																																															Sugp1
																																															Sumf2
																																															Supv3l1
																																															Surf6
																																															Svop
																																															Syne3
																																															Synj2
																																															Synpo
																																															Tacc2
																																															Taf12
																																															Taf8
																																															Tagln
																																															Tanc1
																																															Tardbp
																																															Tars2
																																															Tatdn2
																																															Tax1bp3
																																															Taz
																																															Tbc1d24
																																															Tbc1d2b
																																															Tcf20
																																															Tchp
																																															Tcof1
																																															Tdrp
																																															Tead2
																																															Tef
																																															Tert
																																															Tex2
																																															Tgfb3
																																															Tgfbi
																																															Tgfbr2
																																															Tgm2
																																															Thap1
																																															Thbd
																																															Thbs4
																																															Thoc5
																																															Timm29
																																															Timp3
																																															Tm4sf1
																																															Tmbim1
																																															Tmed8
																																															Tmem11
																																															Tmem120b
																																															Tmem176a
																																															Tmem176b
																																															Tmem18
																																															Tmem206
																																															Tmem238
																																															Tmem25
																																															Tmem38a
																																															Tmem39b
																																															Tmem41a
																																															Tmem44
																																															Tmem8
																																															Tmem86b
																																															Tmprss5
																																															Tnfaip1
																																															Tnfaip3
																																															Tnfrsf1b
																																															Tnks1bp1
																																															Tnpo3
																																															Tns2
																																															Tnxb
																																															Tonsl
																																															Tor1b
																																															Tpcn1
																																															Tpd52l2
																																															Tpm2
																																															Tpm3
																																															Tpx2
																																															Traf2
																																															Traip
																																															Trak1
																																															Trap1
																																															Trappc1
																																															Trappc10
																																															Trappc13
																																															Triap1
																																															Trib2
																																															Trim21
																																															Trim28
																																															Trim34a
																																															Trim66
																																															Trim71
																																															Trp53
																																															Trpc4ap
																																															Trpv2
																																															Trub2
																																															Tsku
																																															Tspan15
																																															Tspan9
																																															Tsr1
																																															Tstd2
																																															Ttc4
																																															Ttc7
																																															Ttyh2
																																															Tub
																																															Tubgcp2
																																															Tut1
																																															Twnk
																																															U2af1
																																															U2af2
																																															Uba2
																																															Ubap1
																																															Ube2f
																																															Ube2o
																																															Ubl7
																																															Ubxn11
																																															Uhrf1bp1
																																															Ulk1
																																															Unc13a
																																															Urm1
																																															Urod
																																															Uros
																																															Use1
																																															Usp36
																																															Usp4
																																															Usp54
																																															Uspl1
																																															Vamp8
																																															Vangl1
																																															Vcam1
																																															Vcp
																																															Vegfa
																																															Vipas39
																																															Vps16
																																															Vps33b
																																															Vps37c
																																															Vps39
																																															Vps4a
																																															Vstm4
																																															Vtn
																																															Wbp1l
																																															Wdfy4
																																															Wdr59
																																															Wdr73
																																															Wdr83
																																															Wdr91
																																															Wipf2
																																															Wnt6
																																															Wrap73
																																															Wwp2
																																															Xkr8
																																															Xpc
																																															Xpnpep1
																																															Xpo5
																																															Xrcc6
																																															Xxylt1
																																															Yae1d1
																																															Yap1
																																															Ybey
																																															Yipf1
																																															Ykt6
																																															Ypel4
																																															Ywhaz
																																															Zbed3
																																															Zbtb40
																																															Zc3hc1
																																															Zcchc10
																																															Zcchc9
																																															Zdhhc17
																																															Zdhhc4
																																															Zfand2b
																																															Zfp14
																																															Zfp217
																																															Zfp263
																																															Zfp341
																																															Zfp346
																																															Zfp36l1
																																															Zfp41
																																															Zfp61
																																															Zfp646
																																															Zfp740
																																															Zfp839
																																															Zfp84
																																															Zic2
																																															Zic5
																																															Znhit3
																																															Zpr1
																																															Zswim4
[truncated: 9 more columns]

## Sheet: Module 01
Category	ID	Name	Source	p-value	q-value Bonferroni	q-value FDR B&H	q-value FDR B&Y	Hit Count in Query List	Hit Count in Genome	Hit in Query List

## Sheet: Module 02
Category	ID	Name	Source	p-value	q-value Bonferroni	q-value FDR B&H	q-value FDR B&Y	Hit Count in Query List	Hit Count in Genome	Hit in Query List
GO: Molecular Function	GO:0008066	glutamate receptor activity		0.0001542	0.06786	0.04472	0.298	5	84	GRID2,NLGN1,GRM3,GRM5,NETO1
GO: Molecular Function	GO:0016595	glutamate binding		0.0002365	0.104	0.04472	0.298	5	92	GRID2,NLGN1,GRM3,GRM5,NETO1
GO: Molecular Function	GO:0016849	phosphorus-oxygen lyase activity		0.0003049	0.1341	0.04472	0.298	8	281	GPHN,PDE4B,P2RY12,GRM3,PTGER3,RIT2,GUCY1A2,ADGRL3
GO: Cellular Component	GO:0098978	glutamatergic synapse		7.562e-06	0.002722	0.002722	0.0176	13	511	CTTNBP2,ADAM23,PPFIA2,GRID2,NLGN1,GRM3,GPC6,GRM5,NETO1,SEPTIN7,CDH8,CDH9,ADGRL3
GO: Cellular Component	GO:0097060	synaptic membrane		7.399e-05	0.02664	0.006995	0.04522	12	548	GPHN,ARHGAP32,ADAM23,GRID2,NLGN1,GRM3,GRM5,LIN7A,NETO1,SEPTIN7,CDH8,CDH9
GO: Cellular Component	GO:0043197	dendritic spine		8.285e-05	0.02983	0.006995	0.04522	8	244	ARHGAP32,PDE4B,CTTNBP2,GRID2,NLGN1,GRM3,GRM5,CDH9
GO: Cellular Component	GO:0044309	neuron spine		9.54e-05	0.03434	0.006995	0.04522	8	249	ARHGAP32,PDE4B,CTTNBP2,GRID2,NLGN1,GRM3,GRM5,CDH9
GO: Cellular Component	GO:0045202	synapse		9.715e-05	0.03497	0.006995	0.04522	21	1482	GPHN,NAT8L,ARHGAP32,PDE4B,CTTNBP2,ADAM23,PPFIA2,GRID2,NLGN1,GRM3,GPC6,GRM5,LIN7A,OLFM3,NETO1,RGS17,SEPTIN7,CDH8,CDH9,ADGRL3,HNRNPR
GO: Cellular Component	GO:0005887	integral component of plasma membrane		0.0002599	0.09357	0.01314	0.08494	22	1710	P2RY12,ADAM23,TRPC5,TRPC6,GRID2,NLGN1,CAV2,GRM3,GPC6,GRM5,PTGER3,OLFM3,KCNQ5,SLCO4C1,NETO1,SCN1A,PCDH11X,TENM1,SGCE,C7,CDH9,ADGRL3
GO: Cellular Component	GO:0098984	neuron to neuron synapse		0.0002781	0.1001	0.01314	0.08494	10	452	GPHN,ARHGAP32,PDE4B,GRID2,NLGN1,GRM3,GRM5,LIN7A,NETO1,CDH9
GO: Cellular Component	GO:0099699	integral component of synaptic membrane		0.0003293	0.1186	0.01314	0.08494	7	226	ADAM23,GRID2,NLGN1,GRM3,GRM5,NETO1,CDH9
GO: Cellular Component	GO:0043005	neuron projection		0.0003424	0.1233	0.01314	0.08494	21	1624	GPHN,ARHGAP32,PDE4B,CTTNBP2,TRPC5,GRID2,NLGN1,GRM3,GRM5,PTGER3,LIN7A,RIT2,SCN1A,TENM1,SGCE,RGS17,SEPTIN7,CDH8,CDH9,ADGRL3,HNRNPR
GO: Cellular Component	GO:0034703	cation channel complex		0.0003856	0.1388	0.01314	0.08494	7	232	PDE4B,TRPC5,TRPC6,NLGN1,OLFM3,KCNQ5,SCN1A
GO: Cellular Component	GO:0099055	integral component of postsynaptic membrane		0.0004462	0.1606	0.01314	0.08494	6	170	GRID2,NLGN1,GRM3,GRM5,NETO1,CDH9
GO: Cellular Component	GO:0034702	ion channel complex		0.0004497	0.1619	0.01314	0.08494	8	313	PDE4B,TRPC5,TRPC6,GRID2,NLGN1,OLFM3,KCNQ5,SCN1A
GO: Cellular Component	GO:0031226	intrinsic component of plasma membrane		0.0004891	0.1761	0.01314	0.08494	22	1790	P2RY12,ADAM23,TRPC5,TRPC6,GRID2,NLGN1,CAV2,GRM3,GPC6,GRM5,PTGER3,OLFM3,KCNQ5,SLCO4C1,NETO1,SCN1A,PCDH11X,TENM1,SGCE,C7,CDH9,ADGRL3
GO: Cellular Component	GO:0099240	intrinsic component of synaptic membrane		0.0005212	0.1876	0.01314	0.08494	7	244	ADAM23,GRID2,NLGN1,GRM3,GRM5,NETO1,CDH9
GO: Cellular Component	GO:0045211	postsynaptic membrane		0.0005474	0.1971	0.01314	0.08494	9	405	GPHN,ARHGAP32,GRID2,NLGN1,GRM3,GRM5,LIN7A,NETO1,CDH9
GO: Cellular Component	GO:0098936	intrinsic component of postsynaptic membrane		0.000586	0.211	0.01318	0.08524	6	179	GRID2,NLGN1,GRM3,GRM5,NETO1,CDH9
GO: Cellular Component	GO:0098793	presynapse		0.0006833	0.246	0.01412	0.09127	12	699	NAT8L,PDE4B,CTTNBP2,ADAM23,PPFIA2,NLGN1,GRM3,LIN7A,SEPTIN7,CDH8,CDH9,HNRNPR
GO: Cellular Component	GO:1902495	transmembrane transporter complex		0.0007298	0.2627	0.01412	0.09127	8	337	PDE4B,TRPC5,TRPC6,GRID2,NLGN1,OLFM3,KCNQ5,SCN1A
GO: Cellular Component	GO:0032279	asymmetric synapse		0.0007844	0.2824	0.01412	0.09127	9	426	GPHN,ARHGAP32,PDE4B,GRID2,NLGN1,GRM3,GRM5,LIN7A,NETO1
GO: Cellular Component	GO:0014069	postsynaptic density		0.0007844	0.2824	0.01412	0.09127	9	426	GPHN,ARHGAP32,PDE4B,GRID2,NLGN1,GRM3,GRM5,LIN7A,NETO1
GO: Cellular Component	GO:1990351	transporter complex		0.0008495	0.3058	0.01456	0.09414	8	345	PDE4B,TRPC5,TRPC6,GRID2,NLGN1,OLFM3,KCNQ5,SCN1A
GO: Cellular Component	GO:0060076	excitatory synapse		0.001107	0.3986	0.01763	0.114	4	79	PDE4B,GRID2,NLGN1,NETO1
GO: Cellular Component	GO:0099634	postsynaptic specialization membrane		0.001126	0.4054	0.01763	0.114	5	136	GPHN,GRID2,NLGN1,GRM5,NETO1
GO: Cellular Component	GO:0099572	postsynaptic specialization		0.001361	0.4899	0.02041	0.132	9	461	GPHN,ARHGAP32,PDE4B,GRID2,NLGN1,GRM3,GRM5,LIN7A,NETO1
GO: Cellular Component	GO:0097447	dendritic tree		0.001726	0.6214	0.0239	0.1545	12	779	GPHN,ARHGAP32,PDE4B,CTTNBP2,TRPC5,GRID2,NLGN1,GRM3,GRM5,RIT2,CDH9,HNRNPR
GO: Cellular Component	GO:0030425	dendrite		0.001726	0.6214	0.0239	0.1545	12	779	GPHN,ARHGAP32,PDE4B,CTTNBP2,TRPC5,GRID2,NLGN1,GRM3,GRM5,RIT2,CDH9,HNRNPR
GO: Cellular Component	GO:0098797	plasma membrane protein complex		0.0026	0.936	0.03467	0.2241	11	711	PDE4B,GRID2,NLGN1,LIN7A,OLFM3,KCNQ5,SCN1A,SGCE,C7,CDH8,CDH9
GO: Cellular Component	GO:0097449	astrocyte projection		0.00371	1	0.0477	0.3084	2	16	GRM3,GRM5
GO: Cellular Component	GO:0008328	ionotropic glutamate receptor complex		0.003878	1	0.04814	0.3112	3	55	GRID2,NLGN1,OLFM3
GO: Cellular Component	GO:0036477	somatodendritic compartment		0.00404	1	0.04848	0.3134	14	1096	GPHN,ARHGAP32,PDE4B,CTTNBP2,TRPC5,GRID2,NLGN1,GRM3,GRM5,PTGER3,RIT2,SCN1A,CDH9,HNRNPR
GO: Cellular Component	GO:0098878	neurotransmitter receptor complex		0.00429	1	0.04982	0.322	3	57	GRID2,NLGN1,OLFM3

## Sheet: Module 03
Category	ID	Name	Source	p-value	q-value Bonferroni	q-value FDR B&H	q-value FDR B&Y	Hit Count in Query List	Hit Count in Genome	Hit in Query List
GO: Biological Process	GO:0048666	neuron development		9.891e-07	0.003063	0.002096	0.01806	23	1298	GABRB3,NRG1,EPHA6,APC,SEMA5A,SHTN1,WNK1,DCX,TRIP11,ZEB2,WDPCP,CHRNA7,GAB2,ARSB,SEMA6D,NEGR1,PCDH15,DNM3,DLG2,PRKN,RPGR,CTNNA2,EPHA5
GO: Biological Process	GO:0001964	startle response		1.354e-06	0.004193	0.002096	0.01806	5	34	NRG1,PCDH15,PRKN,CTNNA2,CSMD1
GO: Biological Process	GO:0030182	neuron differentiation		7.975e-06	0.0247	0.00686	0.0591	24	1579	GABRB3,HDAC9,NRG1,EPHA6,APC,SEMA5A,SHTN1,WNK1,DCX,TRIP11,ZEB2,WDPCP,CHRNA7,GAB2,ARSB,SEMA6D,NEGR1,PCDH15,DNM3,DLG2,PRKN,RPGR,CTNNA2,EPHA5
GO: Biological Process	GO:0048667	cell morphogenesis involved in neuron differentiation		8.86e-06	0.02744	0.00686	0.0591	15	689	NRG1,EPHA6,APC,SEMA5A,SHTN1,DCX,ZEB2,WDPCP,CHRNA7,GAB2,SEMA6D,PCDH15,DNM3,CTNNA2,EPHA5
GO: Biological Process	GO:0051823	regulation of synapse structural plasticity		2.892e-05	0.08956	0.01518	0.1308	3	11	FRMPD4,CHRNA7,CTNNA2
GO: Biological Process	GO:0000904	cell morphogenesis involved in differentiation		3.628e-05	0.1124	0.01518	0.1308	16	873	NRG1,EPHA6,APC,SEMA5A,SHTN1,DCX,ZEB2,WDPCP,CHRNA7,GAB2,SEMA6D,FER,PCDH15,DNM3,CTNNA2,EPHA5
GO: Biological Process	GO:0032990	cell part morphogenesis		3.934e-05	0.1218	0.01518	0.1308	15	783	NRG1,EPHA6,APC,SEMA5A,SHTN1,DCX,ZEB2,CHRNA7,GAB2,SEMA6D,MTM1,DNM3,PRKN,CTNNA2,EPHA5
GO: Biological Process	GO:0022008	neurogenesis		4.308e-05	0.1334	0.01518	0.1308	25	1867	GABRB3,HDAC9,NRG1,EPHA6,APC,SEMA5A,SHTN1,WNK1,DCX,TRIP11,ZEB2,WDPCP,CHRNA7,GAB2,ARSB,SEMA6D,NEGR1,PCDH15,DNM3,DLG2,PRKN,RPGR,CTNNA2,EPHA5,EXOC4
GO: Biological Process	GO:0048699	generation of neurons		4.412e-05	0.1366	0.01518	0.1308	24	1752	GABRB3,HDAC9,NRG1,EPHA6,APC,SEMA5A,SHTN1,WNK1,DCX,TRIP11,ZEB2,WDPCP,CHRNA7,GAB2,ARSB,SEMA6D,NEGR1,PCDH15,DNM3,DLG2,PRKN,RPGR,CTNNA2,EPHA5
GO: Biological Process	GO:0048639	positive regulation of developmental growth		5.801e-05	0.1797	0.01545	0.1331	8	233	NRG1,SGIP1,SEMA5A,SHTN1,DCX,MTM1,PLCB1,PRKN
GO: Biological Process	GO:0120036	plasma membrane bounded cell projection organization		6.208e-05	0.1923	0.01545	0.1331	24	1790	TBC1D19,NRG1,EPHA6,CD2AP,APC,SEMA5A,SHTN1,BBS9,DCX,TRIP11,ZEB2,WDPCP,CHRNA7,GAB2,ARSB,SEMA6D,NEGR1,FER,PCDH15,DNM3,PRKN,RPGR,CTNNA2,EPHA5
GO: Biological Process	GO:0120035	regulation of plasma membrane bounded cell projection organization		6.819e-05	0.2112	0.01545	0.1331	15	822	TBC1D19,NRG1,APC,SEMA5A,SHTN1,DCX,ZEB2,WDPCP,ARSB,SEMA6D,NEGR1,FER,DNM3,PRKN,CTNNA2
GO: Biological Process	GO:0007417	central nervous system development		7.023e-05	0.2175	0.01545	0.1331	18	1129	NRG1,NCOA6,WRN,SEMA5A,GRIK1,DCX,ZEB2,PPARGC1A,ARSB,SEMA6D,MACROD2,PLCB1,PRKN,CTNNA2,PDGFC,IMMP2L,EPHA5,EXOC4
GO: Biological Process	GO:0030029	actin filament-based process		7.499e-05	0.2322	0.01545	0.1331	15	829	SMAP1,FRMPD4,SGCD,CD2AP,SEMA5A,THSD7B,SHTN1,FER,PCDH15,FMN2,PRKN,FGF12,CTNNA2,FRMD3,EPHA5
GO: Biological Process	GO:0031344	regulation of cell projection organization		7.808e-05	0.2418	0.01545	0.1331	15	832	TBC1D19,NRG1,APC,SEMA5A,SHTN1,DCX,ZEB2,WDPCP,ARSB,SEMA6D,NEGR1,FER,DNM3,PRKN,CTNNA2
GO: Biological Process	GO:0030030	cell projection organization		8.639e-05	0.2675	0.01545	0.1331	24	1828	TBC1D19,NRG1,EPHA6,CD2AP,APC,SEMA5A,SHTN1,BBS9,DCX,TRIP11,ZEB2,WDPCP,CHRNA7,GAB2,ARSB,SEMA6D,NEGR1,FER,PCDH15,DNM3,PRKN,RPGR,CTNNA2,EPHA5
GO: Biological Process	GO:0048812	neuron projection morphogenesis		8.654e-05	0.268	0.01545	0.1331	14	743	NRG1,EPHA6,APC,SEMA5A,SHTN1,DCX,ZEB2,CHRNA7,GAB2,SEMA6D,DNM3,PRKN,CTNNA2,EPHA5
GO: Biological Process	GO:0031175	neuron projection development		8.981e-05	0.2781	0.01545	0.1331	18	1151	NRG1,EPHA6,APC,SEMA5A,SHTN1,DCX,TRIP11,ZEB2,CHRNA7,GAB2,ARSB,SEMA6D,NEGR1,PCDH15,DNM3,PRKN,CTNNA2,EPHA5
GO: Biological Process	GO:0120039	plasma membrane bounded cell projection morphogenesis		0.0001068	0.3309	0.01742	0.1501	14	758	NRG1,EPHA6,APC,SEMA5A,SHTN1,DCX,ZEB2,CHRNA7,GAB2,SEMA6D,DNM3,PRKN,CTNNA2,EPHA5
GO: Biological Process	GO:0048858	cell projection morphogenesis		0.0001145	0.3546	0.01773	0.1527	14	763	NRG1,EPHA6,APC,SEMA5A,SHTN1,DCX,ZEB2,CHRNA7,GAB2,SEMA6D,DNM3,PRKN,CTNNA2,EPHA5
GO: Biological Process	GO:0000902	cell morphogenesis		0.0001216	0.3767	0.01794	0.1545	18	1179	NRG1,EPHA6,APC,SEMA5A,SHTN1,DCX,ZEB2,WDPCP,CHRNA7,GAB2,CDH20,SEMA6D,FER,PCDH15,DNM3,PRKN,CTNNA2,EPHA5
GO: Biological Process	GO:0032989	cellular component morphogenesis		0.0001324	0.4102	0.01864	0.1606	19	1297	NRG1,EPHA6,APC,SEMA5A,SHTN1,DCX,ZEB2,WDPCP,CHRNA7,GAB2,CDH20,SEMA6D,MTM1,FER,PCDH15,DNM3,PRKN,CTNNA2,EPHA5
GO: Biological Process	GO:0050905	neuromuscular process		0.0001414	0.4378	0.01904	0.164	6	138	NRG1,PCDH15,PRKN,FGF12,CTNNA2,CSMD1
GO: Biological Process	GO:0048638	regulation of developmental growth		0.00016	0.4956	0.02065	0.1779	10	424	NRG1,SGIP1,APC,SEMA5A,SHTN1,DCX,SEMA6D,MTM1,PLCB1,PRKN
GO: Biological Process	GO:0071242	cellular response to ammonium ion		0.0001717	0.5318	0.02127	0.1833	6	143	GABRB3,HTR1F,ADCY8,CHRNA7,PLCB1,PRKN
GO: Biological Process	GO:0030036	actin cytoskeleton organization		0.0002289	0.7089	0.02726	0.2349	13	717	SMAP1,FRMPD4,CD2AP,SEMA5A,THSD7B,SHTN1,FER,PCDH15,FMN2,PRKN,CTNNA2,FRMD3,EPHA5
GO: Biological Process	GO:0007409	axonogenesis		0.0002546	0.7886	0.02921	0.2516	11	537	NRG1,EPHA6,APC,SEMA5A,SHTN1,DCX,ZEB2,GAB2,SEMA6D,CTNNA2,EPHA5
GO: Biological Process	GO:0060119	inner ear receptor cell development		0.0003152	0.9761	0.03411	0.2939	4	57	GABRB3,TRIP11,WDPCP,PCDH15
GO: Biological Process	GO:0090258	negative regulation of mitochondrial fission		0.0003194	0.9893	0.03411	0.2939	2	5	PPARGC1A,PRKN
GO: Biological Process	GO:0051094	positive regulation of developmental process		0.000342	1	0.03531	0.3042	21	1633	HDAC9,SMAP1,NRG1,SGIP1,ERAP1,APC,SEMA5A,LRRTM3,SHTN1,DCX,ZEB2,CHRNA7,NELL1,PPARGC1A,MALT1,ARSB,NEGR1,MTM1,PLCB1,PRKN,CTNNA2
GO: Biological Process	GO:0050772	positive regulation of axonogenesis		0.0003715	1	0.03711	0.3197	5	107	NRG1,SEMA5A,SHTN1,DCX,ZEB2
GO: Biological Process	GO:0031346	positive regulation of cell projection organization		0.0004295	1	0.04092	0.3526	10	480	NRG1,APC,SEMA5A,SHTN1,DCX,ZEB2,ARSB,NEGR1,DNM3,PRKN
GO: Biological Process	GO:0007010	cytoskeleton organization		0.0004361	1	0.04092	0.3526	21	1663	TBC1D19,SMAP1,FRMPD4,CD2AP,APC,SEMA5A,THSD7B,SHTN1,BBS9,DCX,TRIP11,WDPCP,MTM1,FER,PCDH15,FMN2,PRKN,RPGR,CTNNA2,FRMD3,EPHA5
GO: Biological Process	GO:0007215	glutamate receptor signaling pathway		0.0004583	1	0.04107	0.3538	5	112	GRIK1,GRM8,PPARGC1A,PLCB1,DLG2
GO: Biological Process	GO:1904636	response to ionomycin		0.0004773	1	0.04107	0.3538	2	6	PPARGC1A,PLCB1
GO: Biological Process	GO:1904637	cellular response to ionomycin		0.0004773	1	0.04107	0.3538	2	6	PPARGC1A,PLCB1
GO: Biological Process	GO:0061564	axon development		0.0005168	1	0.04232	0.3646	11	584	NRG1,EPHA6,APC,SEMA5A,SHTN1,DCX,ZEB2,GAB2,SEMA6D,CTNNA2,EPHA5
GO: Biological Process	GO:0060322	head development		0.0005192	1	0.04232	0.3646	14	885	NRG1,NCOA6,WRN,SEMA5A,DCX,ZEB2,PPARGC1A,ARSB,SEMA6D,MACROD2,PLCB1,CTNNA2,IMMP2L,EPHA5
GO: Biological Process	GO:0050808	synapse organization		0.0005718	1	0.04469	0.385	10	498	GABRB3,NRG1,DLGAP1,FRMPD4,LRRTM3,CHRNA7,DNM3,DLG2,CTNNA2,EPHA5
GO: Biological Process	GO:0042176	regulation of protein catabolic process		0.0005772	1	0.04469	0.385	9	410	NRG1,DLGAP1,APC,NELL1,ASB5,MTM1,FMN2,PRKN,FHIT
GO: Biological Process	GO:0045927	positive regulation of growth		0.0006292	1	0.04677	0.403	8	331	NRG1,SGIP1,SEMA5A,SHTN1,DCX,MTM1,PLCB1,PRKN
GO: Biological Process	GO:0051130	positive regulation of cellular component organization		0.0006343	1	0.04677	0.403	18	1351	NRG1,SGIP1,FRMPD4,APC,SEMA5A,LRRTM3,SHTN1,DCX,ZEB2,PPARGC1A,ARSB,NEGR1,FER,DNM3,PLCB1,FMN2,PRKN,CTNNA2
GO: Biological Process	GO:0051656	establishment of organelle localization		0.0006781	1	0.04884	0.4208	13	804	TBC1D19,BBS9,DCX,TRIP11,WDPCP,GAB2,FER,PCDH15,DNM3,FMN2,PRKN,RPGR,EXOC4
GO: Biological Process	GO:0099536	synaptic signaling		0.0007049	1	0.04962	0.4275	14	913	GABRB3,KCNMB2,NRG1,DLGAP1,HTR1F,GRIK1,GRM8,ADCY8,CHRNA7,PLCB1,DLG2,PRKN,FGF12,EXOC4
GO: Cellular Component	GO:0045211	postsynaptic membrane		3.734e-06	0.001423	0.0008397	0.005476	12	405	GABRB3,DLGAP1,GRIK1,LRRTM3,RGS7,ADCY8,CHRNA7,KCTD16,DNM3,DLG2,PRKN,CTNNA2
GO: Cellular Component	GO:0043005	neuron projection		4.408e-06	0.001679	0.0008397	0.005476	25	1624	GABRB3,NRG1,HTR1F,FRMPD4,EPHA6,WRN,APC,GRIK1,SHTN1,GRM8,DCX,RGS7,ADCY8,CHRNA7,PPARGC1A,NEGR1,SBF2,PCDH15,DNM3,DLG2,PRKN,RPGR,CTNNA2,EPHA5,EXOC4
GO: Cellular Component	GO:0097447	dendritic tree		9.64e-06	0.003673	0.0008644	0.005637	16	779	NRG1,HTR1F,FRMPD4,APC,GRIK1,DCX,RGS7,ADCY8,CHRNA7,PPARGC1A,NEGR1,DNM3,DLG2,CTNNA2,EPHA5,EXOC4
GO: Cellular Component	GO:0030425	dendrite		9.64e-06	0.003673	0.0008644	0.005637	16	779	NRG1,HTR1F,FRMPD4,APC,GRIK1,DCX,RGS7,ADCY8,CHRNA7,PPARGC1A,NEGR1,DNM3,DLG2,CTNNA2,EPHA5,EXOC4
GO: Cellular Component	GO:0099572	postsynaptic specialization		1.378e-05	0.005251	0.0008644	0.005637	12	461	GABRB3,DLGAP1,FRMPD4,GRIK1,LRRTM3,ADCY8,CHRNA7,DNM3,DLG2,PRKN,CTNNA2,EXOC4
GO: Cellular Component	GO:0036477	somatodendritic compartment		1.473e-05	0.005612	0.0008644	0.005637	19	1096	NRG1,HTR1F,FRMPD4,APC,GRIK1,SHTN1,GRM8,DCX,RGS7,ADCY8,CHRNA7,PPARGC1A,NEGR1,DNM3,DLG2,PRKN,CTNNA2,EPHA5,EXOC4
GO: Cellular Component	GO:0097060	synaptic membrane		1.588e-05	0.006051	0.0008644	0.005637	13	548	GABRB3,DLGAP1,GRIK1,LRRTM3,GRM8,RGS7,ADCY8,CHRNA7,KCTD16,DNM3,DLG2,PRKN,CTNNA2
GO: Cellular Component	GO:0032279	asymmetric synapse		3.447e-05	0.01313	0.001459	0.009517	11	426	DLGAP1,FRMPD4,GRIK1,LRRTM3,ADCY8,CHRNA7,DNM3,DLG2,PRKN,CTNNA2,EXOC4
GO: Cellular Component	GO:0014069	postsynaptic density		3.447e-05	0.01313	0.001459	0.009517	11	426	DLGAP1,FRMPD4,GRIK1,LRRTM3,ADCY8,CHRNA7,DNM3,DLG2,PRKN,CTNNA2,EXOC4
GO: Cellular Component	GO:0098984	neuron to neuron synapse		5.884e-05	0.02242	0.002242	0.01462	11	452	DLGAP1,FRMPD4,GRIK1,LRRTM3,ADCY8,CHRNA7,DNM3,DLG2,PRKN,CTNNA2,EXOC4
GO: Cellular Component	GO:0030424	axon		6.762e-05	0.02576	0.002342	0.01527	15	817	GABRB3,NRG1,APC,GRIK1,SHTN1,DCX,ADCY8,CHRNA7,SBF2,DNM3,DLG2,PRKN,CTNNA2,EPHA5,EXOC4
GO: Cellular Component	GO:0098794	postsynapse		7.542e-05	0.02873	0.002395	0.01562	15	825	GABRB3,DLGAP1,FRMPD4,GRIK1,LRRTM3,RGS7,ADCY8,CHRNA7,KCTD16,DNM3,PLCB1,DLG2,PRKN,CTNNA2,EXOC4
GO: Cellular Component	GO:0098978	glutamatergic synapse		0.0001735	0.0661	0.005085	0.03316	11	511	NRG1,DLGAP1,FRMPD4,GRIK1,LRRTM3,GRM8,RGS7,ADCY8,DNM3,PLCB1,DLG2
GO: Cellular Component	GO:0150034	distal axon		0.0001937	0.0738	0.005271	0.03438	10	432	GABRB3,APC,GRIK1,SHTN1,DCX,ADCY8,CHRNA7,PRKN,CTNNA2,EXOC4
GO: Cellular Component	GO:0044297	cell body		0.0002545	0.09696	0.006218	0.04055	14	820	NRG1,APC,GRIK1,SHTN1,GRM8,DCX,ADCY8,CHRNA7,PPARGC1A,NEGR1,DLG2,PRKN,EPHA5,EXOC4
GO: Cellular Component	GO:0031252	cell leading edge		0.0002638	0.1005	0.006218	0.04055	10	449	NRG1,CD2AP,APC,SHTN1,CHRNA7,MTM1,FER,CTNNA2,APBB1IP,EXOC4
GO: Cellular Component	GO:0045202	synapse		0.0002783	0.106	0.006218	0.04055	20	1482	GABRB3,NRG1,DLGAP1,SGIP1,FRMPD4,APC,GRIK1,LRRTM3,GRM8,RGS7,ADCY8,CHRNA7,KCTD16,PCDH15,DNM3,PLCB1,DLG2,PRKN,CTNNA2,EXOC4
GO: Cellular Component	GO:0043025	neuronal cell body		0.0002938	0.1119	0.006218	0.04055	13	732	APC,GRIK1,SHTN1,GRM8,DCX,ADCY8,CHRNA7,PPARGC1A,NEGR1,DLG2,PRKN,EPHA5,EXOC4
GO: Cellular Component	GO:0099240	intrinsic component of synaptic membrane		0.0005212	0.1986	0.01045	0.06815	7	244	GABRB3,GRIK1,LRRTM3,GRM8,ADCY8,CHRNA7,DLG2
GO: Cellular Component	GO:0098793	presynapse		0.0006833	0.2603	0.01302	0.08489	12	699	GABRB3,SGIP1,GRIK1,GRM8,RGS7,ADCY8,CHRNA7,KCTD16,DNM3,PRKN,CTNNA2,EXOC4
GO: Cellular Component	GO:0043195	terminal bouton		0.0009855	0.3755	0.01788	0.1166	5	132	GABRB3,GRIK1,ADCY8,PRKN,CTNNA2
GO: Cellular Component	GO:0042734	presynaptic membrane		0.001476	0.5624	0.02556	0.1667	6	214	GRIK1,GRM8,ADCY8,CHRNA7,KCTD16,CTNNA2
GO: Cellular Component	GO:0099699	integral component of synaptic membrane		0.001945	0.741	0.03222	0.2101	6	226	GABRB3,GRIK1,LRRTM3,GRM8,ADCY8,CHRNA7
GO: Cellular Component	GO:0044306	neuron projection terminus		0.003027	1	0.04805	0.3133	6	247	GABRB3,APC,GRIK1,ADCY8,PRKN,CTNNA2
GO: Cellular Component	GO:0098982	GABA-ergic synapse		0.003252	1	0.04956	0.3232	4	106	GABRB3,NRG1,GRM8,PLCB1

## Sheet: Module 04
Category	ID	Name	Source	p-value	q-value Bonferroni	q-value FDR B&H	q-value FDR B&Y	Hit Count in Query List	Hit Count in Genome	Hit in Query List
GO: Molecular Function	GO:0008092	cytoskeletal protein binding		6.823e-08	5.39e-05	5.39e-05	0.0003908	44	1061	MAP9,MYO5A,MAP2,MYO9A,GAS2,RABGAP1,JAKMIP2,BICD1,MAGI2,BRCA2,FMN1,MYPN,NAV3,SYN1,KIF5C,DMD,PLS1,DCDC2,SORBS2,NRCAM,OFD1,STXBP5L,STXBP5,IFT81,KTN1,CEP290,MYO1B,FCHO2,KIF3A,AGBL4,SETD2,CCDC88A,SMC3,UNC5C,STAU2,CTNNA3,CEP70,SNTG1,ROCK1,CDH6,CDH10,CDH11,CDH12,CDH18
GO: Molecular Function	GO:0022839	ion gated channel activity		3.406e-06	0.002691	0.0004825	0.003498	24	478	GABRB1,GABRB2,KCNH7,MYO5A,MEF2C,NRXN1,KCNJ3,SCN2A,LRRC7,FGF14,DMD,AKAP7,AKAP6,CACNA2D1,HCN1,GRIA3,GRIA4,GRM7,JPH1,IL1RAPL1,KCNT2,ASPH,KCNIP4,GABRA3
GO: Molecular Function	GO:0015276	ligand-gated ion channel activity		4.041e-06	0.003192	0.0004825	0.003498	16	237	GABRB1,GABRB2,KCNH7,MYO5A,MEF2C,NRXN1,KCNJ3,LRRC7,DMD,AKAP6,HCN1,GRIA3,GRIA4,JPH1,ASPH,GABRA3
GO: Molecular Function	GO:0017137	Rab GTPase binding		4.112e-06	0.003248	0.0004825	0.003498	14	184	DENND4A,MYO5A,EXPH5,TBC1D5,SYTL2,RABGAP1,BICD1,RABGAP1L,DENND5B,STXBP5L,STXBP5,KIF3A,RIMS1,RIMS2
GO: Molecular Function	GO:0022834	ligand-gated channel activity		4.748e-06	0.003751	0.0004825	0.003498	16	240	GABRB1,GABRB2,KCNH7,MYO5A,MEF2C,NRXN1,KCNJ3,LRRC7,DMD,AKAP6,HCN1,GRIA3,GRIA4,JPH1,ASPH,GABRA3
GO: Molecular Function	GO:0022836	gated channel activity		5.375e-06	0.004246	0.0004825	0.003498	24	491	GABRB1,GABRB2,KCNH7,MYO5A,MEF2C,NRXN1,KCNJ3,SCN2A,LRRC7,FGF14,DMD,AKAP7,AKAP6,CACNA2D1,HCN1,GRIA3,GRIA4,GRM7,JPH1,IL1RAPL1,KCNT2,ASPH,KCNIP4,GABRA3
GO: Molecular Function	GO:0017016	Ras GTPase binding		5.649e-06	0.004463	0.0004825	0.003498	23	459	DENND4A,RAPGEF6,MYO5A,MYCBP2,EXPH5,TBC1D5,SYTL2,RABGAP1,BICD1,CDKL5,RABGAP1L,DENND5B,STXBP5L,STXBP5,PAK5,KIF3A,DOCK7,PAK3,ROCK1,PKN2,RIMS1,RIMS2,SOS1
GO: Molecular Function	GO:0005261	cation channel activity		5.944e-06	0.004696	0.0004825	0.003498	25	528	KCNH7,MYO5A,MEF2C,NRXN1,SLC24A2,KCNJ3,SCN2A,LRRC7,FGF14,DMD,SCLT1,AKAP7,AKAP6,CACNA2D1,DPP10,HCN1,GRIA3,GRIA4,GRM7,JPH1,IL1RAPL1,KCNT2,ASPH,KCNIP4,UNC80
GO: Molecular Function	GO:0022843	voltage-gated cation channel activity		6.174e-06	0.004878	0.0004825	0.003498	16	245	KCNH7,MEF2C,NRXN1,KCNJ3,LRRC7,FGF14,DMD,AKAP7,AKAP6,CACNA2D1,HCN1,GRIA3,GRIA4,GRM7,IL1RAPL1,KCNT2
GO: Molecular Function	GO:0005244	voltage-gated ion channel activity		6.422e-06	0.005073	0.0004825	0.003498	18	304	KCNH7,MEF2C,NRXN1,KCNJ3,SCN2A,LRRC7,FGF14,DMD,AKAP7,AKAP6,CACNA2D1,HCN1,GRIA3,GRIA4,GRM7,IL1RAPL1,KCNT2,KCNIP4
GO: Molecular Function	GO:0022832	voltage-gated channel activity		6.719e-06	0.005308	0.0004825	0.003498	18	305	KCNH7,MEF2C,NRXN1,KCNJ3,SCN2A,LRRC7,FGF14,DMD,AKAP7,AKAP6,CACNA2D1,HCN1,GRIA3,GRIA4,GRM7,IL1RAPL1,KCNT2,KCNIP4
GO: Molecular Function	GO:0005216	ion channel activity		7.469e-06	0.005901	0.0004917	0.003565	28	641	GABRB1,GABRB2,KCNH7,MYO5A,MEF2C,NRXN1,SLC24A2,KCNJ3,SCN2A,LRRC7,FGF14,DMD,SCLT1,AKAP7,AKAP6,CACNA2D1,DPP10,HCN1,GRIA3,GRIA4,GRM7,JPH1,IL1RAPL1,KCNT2,ASPH,KCNIP4,UNC80,GABRA3
GO: Molecular Function	GO:0031267	small GTPase binding		9.527e-06	0.007526	0.000579	0.004197	23	474	DENND4A,RAPGEF6,MYO5A,MYCBP2,EXPH5,TBC1D5,SYTL2,RABGAP1,BICD1,CDKL5,RABGAP1L,DENND5B,STXBP5L,STXBP5,PAK5,KIF3A,DOCK7,PAK3,ROCK1,PKN2,RIMS1,RIMS2,SOS1
GO: Molecular Function	GO:0015631	tubulin binding		1.545e-05	0.0122	0.0008717	0.00632	20	388	MAP9,MAP2,GAS2,RABGAP1,JAKMIP2,BRCA2,FMN1,NAV3,KIF5C,OFD1,IFT81,CEP290,FCHO2,KIF3A,AGBL4,SETD2,CCDC88A,SMC3,UNC5C,CEP70
GO: Molecular Function	GO:0015267	channel activity		4.158e-05	0.03285	0.002105	0.01526	28	705	GABRB1,GABRB2,KCNH7,MYO5A,MEF2C,NRXN1,SLC24A2,KCNJ3,SCN2A,LRRC7,FGF14,DMD,SCLT1,AKAP7,AKAP6,CACNA2D1,DPP10,HCN1,GRIA3,GRIA4,GRM7,JPH1,IL1RAPL1,KCNT2,ASPH,KCNIP4,UNC80,GABRA3
GO: Molecular Function	GO:0022803	passive transmembrane transporter activity		4.263e-05	0.03368	0.002105	0.01526	28	706	GABRB1,GABRB2,KCNH7,MYO5A,MEF2C,NRXN1,SLC24A2,KCNJ3,SCN2A,LRRC7,FGF14,DMD,SCLT1,AKAP7,AKAP6,CACNA2D1,DPP10,HCN1,GRIA3,GRIA4,GRM7,JPH1,IL1RAPL1,KCNT2,ASPH,KCNIP4,UNC80,GABRA3
GO: Molecular Function	GO:0099094	ligand-gated cation channel activity		5.324e-05	0.04206	0.002474	0.01794	13	202	KCNH7,MYO5A,MEF2C,NRXN1,KCNJ3,LRRC7,DMD,AKAP6,HCN1,GRIA3,GRIA4,JPH1,ASPH
GO: Molecular Function	GO:0051020	GTPase binding		7.329e-05	0.0579	0.003216	0.02332	24	577	DENND4A,RAPGEF6,MYO5A,MYCBP2,EXPH5,TBC1D5,SYTL2,RABGAP1,BICD1,CDKL5,RABGAP1L,DENND5B,STXBP5L,STXBP5,PAK5,KIF3A,ARFGEF3,DOCK7,PAK3,ROCK1,PKN2,RIMS1,RIMS2,SOS1
GO: Molecular Function	GO:0030695	GTPase regulator activity		0.0001206	0.09528	0.004768	0.03457	16	313	ARHGAP42,RALGAPA1,ARHGAP15,MYO9A,TBC1D5,ADGRB3,RABGAP1,RABGAP1L,ARHGAP20,RASAL2,ARAP2,STXBP5L,STXBP5,FAM13A,RIMS1,SOS1
GO: Molecular Function	GO:0032559	adenyl ribonucleotide binding		0.0001246	0.09843	0.004768	0.03457	47	1555	ADCY10,ERBB4,ATRX,MYO5A,MYO9A,RPS6KA3,RPS6KB1,RIPK2,ATP10B,CHD1,ATP8B1,SMC5,DNAH14,DDX10,CDKL5,TLK1,BMPR2,MYLK3,ATP11B,NAV3,SYN1,RARS2,KIF5C,MAP3K7,TENT2,AKAP7,TLK2,AKT3,VRK2,CDC42BPA,CAMK4,HCN1,PAK5,MYO1B,ATAD2,KIF3A,CASK,KCNT2,SMC3,CDK13,PRKAA2,ERCC6L2,PAK3,ROCK1,PKN2,PRKG2,EPHA7
GO: Molecular Function	GO:0005096	GTPase activator activity		0.0001267	0.1001	0.004768	0.03457	15	282	ARHGAP42,RALGAPA1,ARHGAP15,MYO9A,TBC1D5,ADGRB3,RABGAP1,RABGAP1L,ARHGAP20,RASAL2,ARAP2,STXBP5L,STXBP5,FAM13A,SOS1
GO: Molecular Function	GO:0030554	adenyl nucleotide binding		0.0001469	0.116	0.005275	0.03824	47	1566	ADCY10,ERBB4,ATRX,MYO5A,MYO9A,RPS6KA3,RPS6KB1,RIPK2,ATP10B,CHD1,ATP8B1,SMC5,DNAH14,DDX10,CDKL5,TLK1,BMPR2,MYLK3,ATP11B,NAV3,SYN1,RARS2,KIF5C,MAP3K7,TENT2,AKAP7,TLK2,AKT3,VRK2,CDC42BPA,CAMK4,HCN1,PAK5,MYO1B,ATAD2,KIF3A,CASK,KCNT2,SMC3,CDK13,PRKAA2,ERCC6L2,PAK3,ROCK1,PKN2,PRKG2,EPHA7
GO: Molecular Function	GO:0005524	ATP binding		0.0001662	0.1313	0.00562	0.04075	45	1485	ADCY10,ERBB4,ATRX,MYO5A,MYO9A,RPS6KA3,RPS6KB1,RIPK2,ATP10B,CHD1,ATP8B1,SMC5,DNAH14,DDX10,CDKL5,TLK1,BMPR2,MYLK3,ATP11B,NAV3,SYN1,RARS2,KIF5C,MAP3K7,TENT2,TLK2,AKT3,VRK2,CDC42BPA,CAMK4,PAK5,MYO1B,ATAD2,KIF3A,CASK,KCNT2,SMC3,CDK13,PRKAA2,ERCC6L2,PAK3,ROCK1,PKN2,PRKG2,EPHA7
GO: Molecular Function	GO:0098882	structural constituent of presynaptic active zone		0.0001707	0.1349	0.00562	0.04075	3	7	PCLO,RIMS1,RIMS2
GO: Molecular Function	GO:0099181	structural constituent of presynapse		0.0003993	0.3155	0.01223	0.08866	3	9	PCLO,RIMS1,RIMS2
GO: Molecular Function	GO:0098632	cell-cell adhesion mediator activity		0.0004025	0.318	0.01223	0.08866	6	56	CNTN6,CNTN5,MYPN,CNTN4,NRCAM,LRRC4C
GO: Molecular Function	GO:0008144	drug binding		0.0004559	0.3602	0.01323	0.09591	50	1785	ADCY10,ERBB4,ATRX,MYO5A,MYO9A,CWC27,RPS6KA3,RPS6KB1,RIPK2,ATP10B,CHD1,ATP8B1,SMC5,CHRM3,DNAH14,DDX10,CDKL5,TLK1,BMPR2,MYLK3,ATP11B,NAV3,SYN1,RARS2,KIF5C,MAP3K7,TENT2,AKAP7,TLK2,AKT3,VRK2,CDC42BPA,CAMK4,PAK5,MYO1B,ATAD2,SUV39H2,KIF3A,CASK,OVGP1,KCNT2,SMC3,CDK13,PRKAA2,ERCC6L2,PAK3,ROCK1,PKN2,PRKG2,EPHA7
GO: Molecular Function	GO:0005509	calcium ion binding		0.0004689	0.3704	0.01323	0.09591	26	734	ACER3,MYO5A,ASPN,LRP1B,ADGRL4,NRXN1,HPGDS,SYT1,ASTN2,PLS1,NPNT,PAMR1,PCLO,EDIL3,GRM7,PCDH20,PPP2R3A,ASPH,KCNIP4,PCDH7,CDH6,PCDH9,CDH10,CDH11,CDH12,CDH18
GO: Molecular Function	GO:0060589	nucleoside-triphosphatase regulator activity		0.000494	0.3902	0.01346	0.09756	16	355	ARHGAP42,RALGAPA1,ARHGAP15,MYO9A,TBC1D5,ADGRB3,RABGAP1,RABGAP1L,ARHGAP20,RASAL2,ARAP2,STXBP5L,STXBP5,FAM13A,RIMS1,SOS1
GO: Molecular Function	GO:0019901	protein kinase binding		0.0006381	0.5041	0.0168	0.1218	28	832	PDE3B,MYO5A,MAP2,PPP1R12A,RPS6KA3,CNTLN,RB1CC1,BICD1,BMPR2,SYN1,MAP3K7,STX17,AKAP7,AKT3,VRK2,NBEA,CNKSR2,FAF1,CCDC88A,CDK13,UNC5C,STAU2,ERCC6L2,PKIB,SPDYA,RIMS1,NRG3,IL1RAP
GO: Molecular Function	GO:0005217	intracellular ligand-gated ion channel activity		0.0006987	0.552	0.01781	0.1291	6	62	MYO5A,DMD,AKAP6,HCN1,JPH1,ASPH
GO: Molecular Function	GO:0030674	protein binding, bridging		0.0007859	0.6209	0.0194	0.1407	12	233	CNTLN,BICD1,MAGI2,FLRT2,SKAP2,AKAP6,SORBS2,COL19A1,KHDRBS2,PPP2R3A,PRKAA2,FBXW7
GO: Molecular Function	GO:0050839	cell adhesion molecule binding		0.0008782	0.6938	0.02089	0.1514	20	525	CD46,ITGA4,FAP,BMPR2,PTPRD,NRXN1,NPNT,KTN1,MYO1B,LRRC4C,NECTIN3,EDIL3,ADAM22,CTNNA3,PKN2,CDH6,CDH10,CDH11,CDH12,CDH18
GO: Molecular Function	GO:0098631	cell adhesion mediator activity		0.0008991	0.7103	0.02089	0.1514	6	65	CNTN6,CNTN5,MYPN,CNTN4,NRCAM,LRRC4C
GO: Molecular Function	GO:0022824	transmitter-gated ion channel activity		0.00104	0.8218	0.02283	0.1655	8	118	GABRB1,GABRB2,MEF2C,NRXN1,LRRC7,GRIA3,GRIA4,GABRA3
GO: Molecular Function	GO:0022835	transmitter-gated channel activity		0.00104	0.8218	0.02283	0.1655	8	118	GABRB1,GABRB2,MEF2C,NRXN1,LRRC7,GRIA3,GRIA4,GABRA3
GO: Molecular Function	GO:0004972	NMDA glutamate receptor activity		0.001154	0.9117	0.02464	0.1786	5	46	MEF2C,NRXN1,LRRC7,GRIA3,GRIA4
GO: Molecular Function	GO:0022851	GABA-gated chloride ion channel activity		0.001291	1	0.02685	0.1946	3	13	GABRB1,GABRB2,GABRA3
GO: Molecular Function	GO:0015278	calcium-release channel activity		0.001402	1	0.02839	0.2058	5	48	MYO5A,DMD,AKAP6,JPH1,ASPH
GO: Molecular Function	GO:0019900	kinase binding		0.001555	1	0.03071	0.2226	29	926	PDE3B,MYO5A,MAP2,PPP1R12A,RPS6KA3,CNTLN,RB1CC1,JAKMIP2,BICD1,BMPR2,SYN1,MAP3K7,STX17,AKAP7,AKT3,VRK2,NBEA,CNKSR2,FAF1,CCDC88A,CDK13,UNC5C,STAU2,ERCC6L2,PKIB,SPDYA,RIMS1,NRG3,IL1RAP
GO: Molecular Function	GO:0004971	AMPA glutamate receptor activity		0.001692	1	0.03183	0.2307	4	30	MEF2C,NRXN1,GRIA3,GRIA4
GO: Molecular Function	GO:0098918	structural constituent of synapse		0.001692	1	0.03183	0.2307	4	30	MAGI2,PCLO,RIMS1,RIMS2
GO: Molecular Function	GO:0022890	inorganic cation transmembrane transporter activity		0.001749	1	0.03214	0.233	27	847	KCNH7,HECW1,MYO5A,MEF2C,NRXN1,SLC24A2,KCNJ3,SCN2A,LRRC7,FGF14,DMD,SCLT1,AKAP7,AKAP6,CACNA2D1,DPP10,HCN1,GRIA3,GRIA4,GRM7,JPH1,IL1RAPL1,KCNT2,ASPH,KCNIP4,DMAC2L,UNC80
GO: Molecular Function	GO:0019894	kinesin binding		0.001843	1	0.0331	0.2399	5	51	MAGI2,DCDC2,KTN1,KIF3A,STAU2
GO: Molecular Function	GO:1904315	transmitter-gated ion channel activity involved in regulation of postsynaptic membrane potential		0.002011	1	0.0353	0.2559	5	52	GABRB1,GABRB2,GRIA3,GRIA4,GABRA3
GO: Molecular Function	GO:0005230	extracellular ligand-gated ion channel activity		0.002231	1	0.03831	0.2778	8	133	GABRB1,GABRB2,MEF2C,NRXN1,LRRC7,GRIA3,GRIA4,GABRA3
GO: Molecular Function	GO:0099604	ligand-gated calcium channel activity		0.002379	1	0.03999	0.2899	5	54	MYO5A,DMD,AKAP6,JPH1,ASPH
GO: Molecular Function	GO:0019966	interleukin-1 binding		0.002433	1	0.04005	0.2903	3	16	IL1RAPL2,IL1RAPL1,IL1RAP
GO: Molecular Function	GO:0099529	neurotransmitter receptor activity involved in regulation of postsynaptic membrane potential		0.002581	1	0.04161	0.3017	5	55	GABRB1,GABRB2,GRIA3,GRIA4,GABRA3
GO: Molecular Function	GO:0005262	calcium channel activity		0.003126	1	0.04938	0.358	10	205	MYO5A,SLC24A2,FGF14,DMD,AKAP6,CACNA2D1,GRM7,JPH1,IL1RAPL1,ASPH
GO: Biological Process	GO:0048666	neuron development		6.246e-13	2.753e-09	2.753e-09	2.469e-08	60	1298	CHL1,GABRB1,GABRB2,HECW1,MAP2,MYCBP2,MYO9A,ADGRB3,ETV1,NCAM2,ATP8B1,ITGA4,NREP,MEF2C,CNTN6,MAGI2,CDKL5,BMPR2,PTPRD,NRXN1,FMN1,CNTN5,MYPN,SYN1,SYT1,LRRC7,FLRT2,KIF5C,DMD,SCLT1,UNC5D,CNTN1,CNTN4,DCDC2,NYAP2,NRCAM,STXBP5,HCN1,CEP290,LRRC4C,KIF3A,CASK,IL1RAPL1,CCDC88A,UNC5C,STAU2,CNTNAP2,DOCK7,PAK3,ELAVL4,ROBO2,ROCK1,RORB,RIMS1,RIMS2,IL1RAP,CDH11,LGI1,EPHA7,SOS1
GO: Biological Process	GO:0048812	neuron projection morphogenesis		1.413e-12	6.228e-09	2.994e-09	2.685e-08	43	743	CHL1,HECW1,MAP2,MYCBP2,MYO9A,ADGRB3,ETV1,ITGA4,CNTN6,CDKL5,BMPR2,PTPRD,NRXN1,FMN1,CNTN5,MYPN,SYT1,FLRT2,KIF5C,UNC5D,CNTN4,DCDC2,NYAP2,NRCAM,STXBP5,LRRC4C,KIF3A,CASK,IL1RAPL1,UNC5C,STAU2,CNTNAP2,DOCK7,PAK3,ELAVL4,ROBO2,ROCK1,RIMS1,RIMS2,CDH11,LGI1,EPHA7,SOS1
GO: Biological Process	GO:0120039	plasma membrane bounded cell projection morphogenesis		2.739e-12	1.207e-08	2.994e-09	2.685e-08	43	758	CHL1,HECW1,MAP2,MYCBP2,MYO9A,ADGRB3,ETV1,ITGA4,CNTN6,CDKL5,BMPR2,PTPRD,NRXN1,FMN1,CNTN5,MYPN,SYT1,FLRT2,KIF5C,UNC5D,CNTN4,DCDC2,NYAP2,NRCAM,STXBP5,LRRC4C,KIF3A,CASK,IL1RAPL1,UNC5C,STAU2,CNTNAP2,DOCK7,PAK3,ELAVL4,ROBO2,ROCK1,RIMS1,RIMS2,CDH11,LGI1,EPHA7,SOS1
GO: Biological Process	GO:0048858	cell projection morphogenesis		3.401e-12	1.499e-08	2.994e-09	2.685e-08	43	763	CHL1,HECW1,MAP2,MYCBP2,MYO9A,ADGRB3,ETV1,ITGA4,CNTN6,CDKL5,BMPR2,PTPRD,NRXN1,FMN1,CNTN5,MYPN,SYT1,FLRT2,KIF5C,UNC5D,CNTN4,DCDC2,NYAP2,NRCAM,STXBP5,LRRC4C,KIF3A,CASK,IL1RAPL1,UNC5C,STAU2,CNTNAP2,DOCK7,PAK3,ELAVL4,ROBO2,ROCK1,RIMS1,RIMS2,CDH11,LGI1,EPHA7,SOS1
GO: Biological Process	GO:0030182	neuron differentiation		3.466e-12	1.527e-08	2.994e-09	2.685e-08	66	1579	CHL1,GABRB1,GABRB2,BRINP3,ERBB4,HECW1,MAP2,MYCBP2,MYO9A,ADGRB3,ETV1,NCAM2,MDGA2,BRINP1,ATP8B1,ITGA4,NREP,MEF2C,CNTN6,MAGI2,CDKL5,BMPR2,PTPRD,NRXN1,FMN1,CNTN5,MYPN,SYN1,SYT1,LRRC7,FLRT2,KIF5C,DMD,SCLT1,UNC5D,TENT2,CNTN1,CNTN4,DCDC2,NYAP2,NRCAM,STXBP5,HCN1,CEP290,LRRC4C,KIF3A,CASK,IL1RAPL1,PPP2R3A,CCDC88A,UNC5C,STAU2,CNTNAP2,DOCK7,PAK3,ELAVL4,ROBO2,ROCK1,RORB,RIMS1,RIMS2,IL1RAP,CDH11,LGI1,EPHA7,SOS1
GO: Biological Process	GO:0098742	cell-cell adhesion via plasma-membrane adhesion molecules		4.719e-12	2.08e-08	2.994e-09	2.685e-08	26	292	CHL1,MDGA2,ITGA4,CNTN6,MAGI2,PTPRD,NRXN1,LRFN5,CNTN5,MYPN,UNC5D,CNTN4,NRCAM,LRRC4C,NECTIN3,PCDH20,IL1RAPL1,ROBO2,IL1RAP,PCDH7,CDH6,PCDH9,CDH10,CDH11,CDH12,CDH18
GO: Biological Process	GO:0022008	neurogenesis		4.756e-12	2.096e-08	2.994e-09	2.685e-08	73	1867	CHL1,GABRB1,GABRB2,BRINP3,ERBB4,HECW1,MAP2,MYCBP2,MYO9A,ADGRB3,ETV1,NCAM2,MDGA2,BRINP1,ATP8B1,ITGA4,NREP,MEF2C,CNTN6,MAGI2,CDKL5,BMPR2,PTPRD,NRXN1,FMN1,CNTN5,MYPN,NAV3,SYN1,SYT1,LRRC7,FLRT2,KIF5C,DMD,BACE2,SCLT1,UNC5D,TENT2,CNTN1,VEGFC,CNTN4,DCDC2,EPM2A,NYAP2,NRCAM,STXBP5,HCN1,CEP290,LRRC4C,ADAM22,KIF3A,ADGRG6,CASK,IL1RAPL1,PPP2R3A,CCDC88A,UNC5C,STAU2,CNTNAP2,DOCK7,PAK3,ELAVL4,ROBO2,ROCK1,RORB,RI…
GO: Biological Process	GO:0032990	cell part morphogenesis		7.931e-12	3.495e-08	4.369e-09	3.918e-08	43	783	CHL1,HECW1,MAP2,MYCBP2,MYO9A,ADGRB3,ETV1,ITGA4,CNTN6,CDKL5,BMPR2,PTPRD,NRXN1,FMN1,CNTN5,MYPN,SYT1,FLRT2,KIF5C,UNC5D,CNTN4,DCDC2,NYAP2,NRCAM,STXBP5,LRRC4C,KIF3A,CASK,IL1RAPL1,UNC5C,STAU2,CNTNAP2,DOCK7,PAK3,ELAVL4,ROBO2,ROCK1,RIMS1,RIMS2,CDH11,LGI1,EPHA7,SOS1
GO: Biological Process	GO:0050808	synapse organization		2.029e-11	8.943e-08	9.936e-09	8.911e-08	33	498	GABRB2,ERBB4,MYO5A,ADGRB3,MDGA2,MEF2C,MAGI2,CDKL5,PTPRD,NRXN1,IL1RAPL2,LRFN5,CNTN5,LRRTM4,SYN1,FLRT2,SORBS2,DRP2,NRCAM,PCLO,CNKSR2,LINGO2,LRRC4C,CASK,IL1RAPL1,SRGN,STAU2,PAK3,ROBO2,RIMS1,RIMS2,IL1RAP,EPHA7
GO: Biological Process	GO:0007416	synapse assembly		3.415e-11	1.505e-07	1.505e-08	1.35e-07	21	203	GABRB2,ERBB4,ADGRB3,MDGA2,MEF2C,MAGI2,PTPRD,NRXN1,IL1RAPL2,LRFN5,CNTN5,LRRTM4,FLRT2,NRCAM,PCLO,LINGO2,IL1RAPL1,STAU2,ROBO2,IL1RAP,EPHA7
GO: Biological Process	GO:0048699	generation of neurons		4.262e-11	1.878e-07	1.708e-08	1.531e-07	68	1752	CHL1,GABRB1,GABRB2,BRINP3,ERBB4,HECW1,MAP2,MYCBP2,MYO9A,ADGRB3,ETV1,NCAM2,MDGA2,BRINP1,ATP8B1,ITGA4,NREP,MEF2C,CNTN6,MAGI2,CDKL5,BMPR2,PTPRD,NRXN1,FMN1,CNTN5,MYPN,SYN1,SYT1,LRRC7,FLRT2,KIF5C,DMD,SCLT1,UNC5D,TENT2,CNTN1,VEGFC,CNTN4,DCDC2,NYAP2,NRCAM,STXBP5,HCN1,CEP290,LRRC4C,KIF3A,CASK,IL1RAPL1,PPP2R3A,CCDC88A,UNC5C,STAU2,CNTNAP2,DOCK7,PAK3,ELAVL4,ROBO2,ROCK1,RORB,RIMS1,NRG3,RIMS2,IL1RAP,CDH11,LGI…
GO: Biological Process	GO:0031175	neuron projection development		6.369e-11	2.807e-07	2.339e-08	2.098e-07	52	1151	CHL1,HECW1,MAP2,MYCBP2,MYO9A,ADGRB3,ETV1,NCAM2,ITGA4,NREP,MEF2C,CNTN6,MAGI2,CDKL5,BMPR2,PTPRD,NRXN1,FMN1,CNTN5,MYPN,SYT1,LRRC7,FLRT2,KIF5C,DMD,UNC5D,CNTN1,CNTN4,DCDC2,NYAP2,NRCAM,STXBP5,LRRC4C,KIF3A,CASK,IL1RAPL1,CCDC88A,UNC5C,STAU2,CNTNAP2,DOCK7,PAK3,ELAVL4,ROBO2,ROCK1,RIMS1,RIMS2,IL1RAP,CDH11,LGI1,EPHA7,SOS1
GO: Biological Process	GO:0030030	cell projection organization		1.018e-10	4.485e-07	3.43e-08	3.076e-07	69	1828	CHL1,RAPGEF6,HECW1,MAP2,MYCBP2,MYO9A,TBC1D5,ADGRB3,ETV1,NCAM2,ATP8B1,RABGAP1,LRRC6,ITGA4,NREP,MEF2C,CNTN6,MAGI2,CDKL5,TBC1D32,FAP,BMPR2,PTPRD,NRXN1,FMN1,CNTN5,MYPN,NAV3,SYT1,LRRC7,FLRT2,KIF5C,DMD,SCLT1,PLS1,UNC5D,CNTN1,CNTN4,DCDC2,NYAP2,NRCAM,OFD1,STXBP5,IFT81,CEP290,LRRC4C,CCDC39,KIF3A,CASK,IL1RAPL1,CCDC88A,UNC5C,STAU2,CEP83,CNTNAP2,CEP70,DOCK7,PAK3,ELAVL4,ROBO2,ROCK1,PKN2,RIMS1,RIMS2,IL1RAP,CDH…
GO: Biological Process	GO:0120036	plasma membrane bounded cell projection organization		1.09e-10	4.803e-07	3.43e-08	3.076e-07	68	1790	CHL1,RAPGEF6,HECW1,MAP2,MYCBP2,MYO9A,TBC1D5,ADGRB3,ETV1,NCAM2,ATP8B1,RABGAP1,LRRC6,ITGA4,NREP,MEF2C,CNTN6,MAGI2,CDKL5,TBC1D32,FAP,BMPR2,PTPRD,NRXN1,FMN1,CNTN5,MYPN,NAV3,SYT1,LRRC7,FLRT2,KIF5C,DMD,SCLT1,PLS1,UNC5D,CNTN1,CNTN4,DCDC2,NYAP2,NRCAM,OFD1,STXBP5,IFT81,CEP290,LRRC4C,CCDC39,KIF3A,CASK,IL1RAPL1,CCDC88A,UNC5C,STAU2,CEP83,CNTNAP2,CEP70,DOCK7,PAK3,ELAVL4,ROBO2,ROCK1,RIMS1,RIMS2,IL1RAP,CDH11,LG…
GO: Biological Process	GO:0000902	cell morphogenesis		4.591e-10	2.023e-06	1.324e-07	1.188e-06	51	1179	CHL1,HECW1,ARHGAP15,MAP2,MYCBP2,MYO9A,GAS2,ADGRB3,ETV1,ITGA4,MEF2C,CNTN6,CDKL5,BMPR2,PTPRD,NRXN1,FMN1,CNTN5,MYPN,SYT1,FLRT2,KIF5C,UNC5D,CNTN4,DCDC2,NYAP2,NRCAM,STXBP5,LRRC4C,KIF3A,CASK,IL1RAPL1,MEGF9,UNC5C,STAU2,CNTNAP2,DOCK7,PAK3,ELAVL4,ROBO2,ROCK1,RIMS1,RIMS2,CDH6,CDH10,CDH11,CDH12,CDH18,LGI1,EPHA7,SOS1
GO: Biological Process	GO:0048667	cell morphogenesis involved in neuron differentiation		4.808e-10	2.119e-06	1.324e-07	1.188e-06	37	689	CHL1,HECW1,MAP2,MYCBP2,ADGRB3,ETV1,ITGA4,MEF2C,CNTN6,CDKL5,BMPR2,PTPRD,NRXN1,FMN1,CNTN5,MYPN,FLRT2,KIF5C,UNC5D,CNTN4,DCDC2,NRCAM,STXBP5,LRRC4C,KIF3A,CASK,IL1RAPL1,UNC5C,STAU2,DOCK7,PAK3,ELAVL4,ROBO2,CDH11,LGI1,EPHA7,SOS1
GO: Biological Process	GO:0050807	regulation of synapse organization		1.259e-09	5.55e-06	3.265e-07	2.928e-06	22	271	ADGRB3,MDGA2,MEF2C,MAGI2,CDKL5,PTPRD,NRXN1,IL1RAPL2,LRFN5,LRRTM4,FLRT2,SORBS2,NRCAM,LINGO2,CASK,IL1RAPL1,SRGN,STAU2,PAK3,ROBO2,IL1RAP,EPHA7
GO: Biological Process	GO:0032989	cellular component morphogenesis		1.497e-09	6.597e-06	3.665e-07	3.287e-06	53	1297	CHL1,HECW1,ARHGAP15,MAP2,MYCBP2,MYO9A,GAS2,ADGRB3,ETV1,ITGA4,MEF2C,CNTN6,CDKL5,BMPR2,PTPRD,MYLK3,NRXN1,FMN1,CNTN5,MYPN,SYT1,FLRT2,KIF5C,UNC5D,CNTN4,DCDC2,NYAP2,NRCAM,STXBP5,EQTN,LRRC4C,KIF3A,CASK,IL1RAPL1,MEGF9,UNC5C,STAU2,CNTNAP2,DOCK7,PAK3,ELAVL4,ROBO2,ROCK1,RIMS1,RIMS2,CDH6,CDH10,CDH11,CDH12,CDH18,LGI1,EPHA7,SOS1
GO: Biological Process	GO:0051963	regulation of synapse assembly		2.099e-09	9.25e-06	4.868e-07	4.366e-06	15	122	ADGRB3,MDGA2,MEF2C,PTPRD,NRXN1,IL1RAPL2,LRFN5,LRRTM4,FLRT2,LINGO2,IL1RAPL1,STAU2,ROBO2,IL1RAP,EPHA7
GO: Biological Process	GO:0050803	regulation of synapse structure or activity		2.649e-09	1.167e-05	5.836e-07	5.234e-06	22	282	ADGRB3,MDGA2,MEF2C,MAGI2,CDKL5,PTPRD,NRXN1,IL1RAPL2,LRFN5,LRRTM4,FLRT2,SORBS2,NRCAM,LINGO2,CASK,IL1RAPL1,SRGN,STAU2,PAK3,ROBO2,IL1RAP,EPHA7
GO: Biological Process	GO:0099536	synaptic signaling		9.946e-09	4.383e-05	2.087e-06	1.872e-05	41	913	GABRB1,GABRB2,ERBB4,MYO5A,CHRM3,MEF2C,PTPRD,NRXN1,SLC24A2,SCN2A,PLCL2,SYN1,SYT1,FGF14,AKAP7,CNTN4,SORBS2,NRCAM,STXBP5L,DTNA,CAMK4,STXBP5,PCLO,GRIA3,GRIA4,LRRC4C,GRM7,CASK,IL1RAPL1,SRGN,STAU2,CNTNAP2,ELAVL4,RIMS1,NRG3,CADPS2,RIMS2,IL1RAP,CDH11,LGI1,GABRA3
GO: Biological Process	GO:0099172	presynapse organization		1.401e-08	6.176e-05	2.807e-06	2.518e-05	11	67	MDGA2,PTPRD,NRXN1,IL1RAPL2,LRFN5,CNTN5,PCLO,IL1RAPL1,RIMS1,RIMS2,IL1RAP
GO: Biological Process	GO:0099537	trans-synaptic signaling		2.035e-08	8.968e-05	3.899e-06	3.497e-05	40	900	GABRB1,GABRB2,ERBB4,MYO5A,CHRM3,MEF2C,PTPRD,NRXN1,SLC24A2,SCN2A,PLCL2,SYN1,SYT1,FGF14,AKAP7,CNTN4,NRCAM,STXBP5L,DTNA,CAMK4,STXBP5,PCLO,GRIA3,GRIA4,LRRC4C,GRM7,CASK,IL1RAPL1,SRGN,STAU2,CNTNAP2,ELAVL4,RIMS1,NRG3,CADPS2,RIMS2,IL1RAP,CDH11,LGI1,GABRA3
GO: Biological Process	GO:0000904	cell morphogenesis involved in differentiation		2.709e-08	0.0001194	4.974e-06	4.461e-05	39	873	CHL1,HECW1,MAP2,MYCBP2,ADGRB3,ETV1,ITGA4,MEF2C,CNTN6,CDKL5,BMPR2,PTPRD,NRXN1,FMN1,CNTN5,MYPN,FLRT2,KIF5C,UNC5D,CNTN4,DCDC2,NRCAM,STXBP5,LRRC4C,KIF3A,CASK,IL1RAPL1,MEGF9,UNC5C,STAU2,DOCK7,PAK3,ELAVL4,ROBO2,ROCK1,CDH11,LGI1,EPHA7,SOS1
GO: Biological Process	GO:0007156	homophilic cell adhesion via plasma membrane adhesion molecules		4.908e-08	0.0002163	8.651e-06	7.759e-05	16	176	CHL1,CNTN6,CNTN5,MYPN,CNTN4,NRCAM,NECTIN3,PCDH20,ROBO2,PCDH7,CDH6,PCDH9,CDH10,CDH11,CDH12,CDH18
GO: Biological Process	GO:0051960	regulation of nervous system development		5.931e-08	0.0002614	1.005e-05	9.015e-05	44	1088	BRINP3,ERBB4,HECW1,MAP2,MYCBP2,MYO9A,ADGRB3,MDGA2,BRINP1,NREP,MEF2C,MAGI2,CDKL5,BMPR2,PTPRD,NRXN1,IL1RAPL2,LRFN5,LRRTM4,SYT1,LRRC7,FLRT2,DMD,UNC5D,CNTN1,VEGFC,CNTN4,NRCAM,LINGO2,LRRC4C,CASK,IL1RAPL1,CCDC88A,STAU2,DOCK7,PAK3,ELAVL4,ROBO2,ROCK1,RIMS1,NRG3,RIMS2,IL1RAP,EPHA7
GO: Biological Process	GO:0007155	cell adhesion		9.445e-08	0.0004162	1.542e-05	0.0001383	54	1509	CHL1,PDE3B,PPP1R12A,RIPK2,IL20RB,NCAM2,MDGA2,CD46,ITGA4,CADM2,CNTN6,MAGI2,FAP,CNTNAP5,PTPRD,NRXN1,FMN1,LRFN5,CNTN5,MYPN,LRRC7,FLRT2,DMD,UNC5D,CNTN1,NPNT,VEGFC,CNTN4,COL19A1,NRCAM,LRRC4C,NECTIN3,EDIL3,ADAM22,PCDH20,FAF1,CASK,IL1RAPL1,MEGF9,CNTNAP2,CTNNA3,PAK3,ROBO2,ROCK1,PKN2,IL1RAP,PCDH7,CDH6,PCDH9,CDH10,CDH11,CDH12,CDH18,EPHA7
GO: Biological Process	GO:0022610	biological adhesion		1.098e-07	0.0004838	1.728e-05	0.0001549	54	1516	CHL1,PDE3B,PPP1R12A,RIPK2,IL20RB,NCAM2,MDGA2,CD46,ITGA4,CADM2,CNTN6,MAGI2,FAP,CNTNAP5,PTPRD,NRXN1,FMN1,LRFN5,CNTN5,MYPN,LRRC7,FLRT2,DMD,UNC5D,CNTN1,NPNT,VEGFC,CNTN4,COL19A1,NRCAM,LRRC4C,NECTIN3,EDIL3,ADAM22,PCDH20,FAF1,CASK,IL1RAPL1,MEGF9,CNTNAP2,CTNNA3,PAK3,ROBO2,ROCK1,PKN2,IL1RAP,PCDH7,CDH6,PCDH9,CDH10,CDH11,CDH12,CDH18,EPHA7
GO: Biological Process	GO:0007268	chemical synaptic transmission		1.367e-07	0.0006022	2.007e-05	0.00018	38	891	GABRB1,GABRB2,ERBB4,MYO5A,CHRM3,MEF2C,PTPRD,NRXN1,SLC24A2,SCN2A,PLCL2,SYN1,SYT1,FGF14,AKAP7,CNTN4,NRCAM,STXBP5L,DTNA,CAMK4,STXBP5,PCLO,GRIA3,GRIA4,LRRC4C,GRM7,CASK,SRGN,STAU2,CNTNAP2,ELAVL4,RIMS1,NRG3,CADPS2,RIMS2,CDH11,LGI1,GABRA3
GO: Biological Process	GO:0098916	anterograde trans-synaptic signaling		1.367e-07	0.0006022	2.007e-05	0.00018	38	891	GABRB1,GABRB2,ERBB4,MYO5A,CHRM3,MEF2C,PTPRD,NRXN1,SLC24A2,SCN2A,PLCL2,SYN1,SYT1,FGF14,AKAP7,CNTN4,NRCAM,STXBP5L,DTNA,CAMK4,STXBP5,PCLO,GRIA3,GRIA4,LRRC4C,GRM7,CASK,SRGN,STAU2,CNTNAP2,ELAVL4,RIMS1,NRG3,CADPS2,RIMS2,CDH11,LGI1,GABRA3
GO: Biological Process	GO:0061564	axon development		2.127e-07	0.0009376	3.024e-05	0.0002712	29	584	CHL1,MAP2,MYCBP2,ETV1,NCAM2,ITGA4,NREP,CNTN6,CDKL5,BMPR2,NRXN1,CNTN5,MYPN,FLRT2,KIF5C,UNC5D,CNTN4,NRCAM,STXBP5,LRRC4C,KIF3A,UNC5C,DOCK7,PAK3,ROBO2,CDH11,LGI1,EPHA7,SOS1
GO: Biological Process	GO:0099054	presynapse assembly		2.592e-07	0.001142	3.57e-05	0.0003201	9	54	MDGA2,PTPRD,NRXN1,IL1RAPL2,LRFN5,CNTN5,PCLO,IL1RAPL1,IL1RAP
GO: Biological Process	GO:0007409	axonogenesis		4.451e-07	0.001962	5.944e-05	0.0005331	27	537	CHL1,MAP2,MYCBP2,ETV1,ITGA4,CNTN6,CDKL5,BMPR2,NRXN1,CNTN5,MYPN,FLRT2,KIF5C,UNC5D,CNTN4,NRCAM,STXBP5,LRRC4C,KIF3A,UNC5C,DOCK7,PAK3,ROBO2,CDH11,LGI1,EPHA7,SOS1
GO: Biological Process	GO:0099560	synaptic membrane adhesion		6.541e-07	0.002883	8.371e-05	0.0007507	7	31	MDGA2,MAGI2,PTPRD,NRXN1,LRFN5,LRRC4C,IL1RAP
GO: Biological Process	GO:0098609	cell-cell adhesion		6.648e-07	0.00293	8.371e-05	0.0007507	37	911	CHL1,RIPK2,IL20RB,NCAM2,MDGA2,CD46,ITGA4,CNTN6,MAGI2,PTPRD,NRXN1,LRFN5,CNTN5,MYPN,LRRC7,UNC5D,NPNT,CNTN4,COL19A1,NRCAM,LRRC4C,NECTIN3,PCDH20,IL1RAPL1,CTNNA3,PAK3,ROBO2,ROCK1,IL1RAP,PCDH7,CDH6,PCDH9,CDH10,CDH11,CDH12,CDH18,EPHA7
GO: Biological Process	GO:0050767	regulation of neurogenesis		1.174e-06	0.005176	0.000141	0.001264	38	972	BRINP3,ERBB4,HECW1,MAP2,MYCBP2,MYO9A,ADGRB3,BRINP1,NREP,MEF2C,MAGI2,CDKL5,BMPR2,PTPRD,SYT1,LRRC7,FLRT2,DMD,UNC5D,CNTN1,VEGFC,CNTN4,NRCAM,LRRC4C,CASK,IL1RAPL1,CCDC88A,STAU2,DOCK7,PAK3,ELAVL4,ROBO2,ROCK1,RIMS1,NRG3,RIMS2,IL1RAP,EPHA7
GO: Biological Process	GO:0007411	axon guidance		1.188e-06	0.005237	0.000141	0.001264	19	307	CHL1,MYCBP2,ETV1,CNTN6,BMPR2,NRXN1,CNTN5,MYPN,FLRT2,KIF5C,UNC5D,CNTN4,NRCAM,KIF3A,UNC5C,ROBO2,LGI1,EPHA7,SOS1
GO: Biological Process	GO:0060284	regulation of cell development		1.228e-06	0.00541	0.000141	0.001264	42	1133	BRINP3,ERBB4,HECW1,MAP2,MYCBP2,MYO9A,PPP1R12A,ADGRB3,BRINP1,NREP,MEF2C,MAGI2,CDKL5,BMPR2,PTPRD,MYLK3,SYT1,LRRC7,FLRT2,DMD,UNC5D,CNTN1,AKAP6,VEGFC,CNTN4,NRCAM,LRRC4C,CASK,IL1RAPL1,CCDC88A,STAU2,DOCK7,PAK3,ELAVL4,ROBO2,ROCK1,RIMS1,NRG3,RIMS2,IL1RAP,EPHA7,FBXW7
GO: Biological Process	GO:0097485	neuron projection guidance		1.248e-06	0.005498	0.000141	0.001264	19	308	CHL1,MYCBP2,ETV1,CNTN6,BMPR2,NRXN1,CNTN5,MYPN,FLRT2,KIF5C,UNC5D,CNTN4,NRCAM,KIF3A,UNC5C,ROBO2,LGI1,EPHA7,SOS1
GO: Biological Process	GO:0120035	regulation of plasma membrane bounded cell projection organization		1.299e-06	0.005726	0.0001431	0.001284	34	822	HECW1,MAP2,MYCBP2,MYO9A,TBC1D5,ADGRB3,ATP8B1,RABGAP1,MEF2C,MAGI2,CDKL5,BMPR2,PTPRD,NRXN1,NAV3,SYT1,LRRC7,DMD,PLS1,CNTN1,DCDC2,NRCAM,LRRC4C,CASK,IL1RAPL1,CCDC88A,STAU2,PAK3,ELAVL4,ROBO2,RIMS1,RIMS2,IL1RAP,EPHA7
GO: Biological Process	GO:0060341	regulation of cellular localization		1.455e-06	0.006411	0.0001564	0.001402	40	1060	ERBB4,PDE3B,MYO5A,MAP2,PPP1R12A,RBM26,ERLEC1,MEF2C,BICD1,MAGI2,NRXN1,SYN1,SYT1,ASTN2,FGF14,GPC5,DMD,PLS1,AKAP6,DNAJC13,EPM2A,SORBS2,DPP10,STXBP5L,CAMK4,STXBP5,CEP290,GRM7,KIF3A,CASK,JPH1,SETD2,CCDC88A,GCC2,PRKAA2,ASPH,ROCK1,RIMS1,RIMS2,FBXW7
GO: Biological Process	GO:0099175	regulation of postsynapse organization		1.567e-06	0.006905	0.0001644	0.001474	12	127	CDKL5,PTPRD,NRXN1,SORBS2,NRCAM,CASK,IL1RAPL1,SRGN,STAU2,PAK3,IL1RAP,EPHA7
GO: Biological Process	GO:0031344	regulation of cell projection organization		1.699e-06	0.007486	0.0001741	0.001561	34	832	HECW1,MAP2,MYCBP2,MYO9A,TBC1D5,ADGRB3,ATP8B1,RABGAP1,MEF2C,MAGI2,CDKL5,BMPR2,PTPRD,NRXN1,NAV3,SYT1,LRRC7,DMD,PLS1,CNTN1,DCDC2,NRCAM,LRRC4C,CASK,IL1RAPL1,CCDC88A,STAU2,PAK3,ELAVL4,ROBO2,RIMS1,RIMS2,IL1RAP,EPHA7
GO: Biological Process	GO:1905606	regulation of presynapse assembly		1.932e-06	0.008514	0.0001935	0.001735	7	36	MDGA2,PTPRD,NRXN1,IL1RAPL2,LRFN5,IL1RAPL1,IL1RAP
GO: Biological Process	GO:0099173	postsynapse organization		2.817e-06	0.01242	0.0002759	0.002474	15	210	MAGI2,CDKL5,PTPRD,NRXN1,LRRTM4,SORBS2,NRCAM,CNKSR2,CASK,IL1RAPL1,SRGN,STAU2,PAK3,IL1RAP,EPHA7
GO: Biological Process	GO:0099174	regulation of presynapse organization		3.409e-06	0.01502	0.0003266	0.002929	7	39	MDGA2,PTPRD,NRXN1,IL1RAPL2,LRFN5,IL1RAPL1,IL1RAP
GO: Biological Process	GO:0045664	regulation of neuron differentiation		4.412e-06	0.01944	0.0004137	0.00371	32	792	BRINP3,HECW1,MAP2,MYCBP2,MYO9A,ADGRB3,BRINP1,NREP,MEF2C,MAGI2,CDKL5,BMPR2,PTPRD,SYT1,LRRC7,DMD,CNTN1,CNTN4,NRCAM,LRRC4C,CASK,IL1RAPL1,CCDC88A,STAU2,PAK3,ELAVL4,ROBO2,ROCK1,RIMS1,RIMS2,IL1RAP,EPHA7
GO: Biological Process	GO:0050804	modulation of chemical synaptic transmission		5.033e-06	0.02218	0.0004621	0.004144	25	539	ERBB4,MEF2C,PTPRD,NRXN1,SLC24A2,PLCL2,SYN1,SYT1,FGF14,AKAP7,CNTN4,STXBP5L,STXBP5,GRIA4,LRRC4C,GRM7,CASK,SRGN,STAU2,ELAVL4,RIMS1,NRG3,RIMS2,CDH11,LGI1
GO: Biological Process	GO:0099177	regulation of trans-synaptic signaling		5.197e-06	0.0229	0.0004655	0.004174	25	540	ERBB4,MEF2C,PTPRD,NRXN1,SLC24A2,PLCL2,SYN1,SYT1,FGF14,AKAP7,CNTN4,STXBP5L,STXBP5,GRIA4,LRRC4C,GRM7,CASK,SRGN,STAU2,ELAVL4,RIMS1,NRG3,RIMS2,CDH11,LGI1
GO: Biological Process	GO:0007267	cell-cell signaling		5.281e-06	0.02327	0.0004655	0.004174	58	1899	GABRB1,GABRB2,USP34,ERBB4,PDE3B,HECW1,MYO5A,CHRM3,MEF2C,PGR,MAGI2,BMP3,PTPRD,NRXN1,SLC24A2,KCNJ3,SCN2A,PLCL2,SYN1,SYT1,FGF14,GPC5,MAP3K7,AKAP7,TRHDE,CNTN4,CACNA2D1,DCDC2,EPM2A,SORBS2,NRCAM,STXBP5L,DTNA,CAMK4,STXBP5,PCLO,GRIA3,GRIA4,LRRC4C,GRM7,CASK,IL1RAPL1,PPP2R3A,SRGN,PRKAA2,STAU2,CNTNAP2,ELAVL4,ROBO2,RIMS1,NRG3,CADPS2,RIMS2,IL1RAP,CDH11,LRRFIP2,LGI1,GABRA3
GO: Biological Process	GO:0010975	regulation of neuron projection development		5.603e-06	0.02469	0.000475	0.00426	27	614	HECW1,MAP2,MYCBP2,MYO9A,ADGRB3,MEF2C,MAGI2,CDKL5,BMPR2,PTPRD,SYT1,LRRC7,DMD,CNTN1,NRCAM,LRRC4C,CASK,IL1RAPL1,CCDC88A,STAU2,PAK3,ELAVL4,ROBO2,RIMS1,RIMS2,IL1RAP,EPHA7
GO: Biological Process	GO:0051965	positive regulation of synapse assembly		5.605e-06	0.0247	0.000475	0.00426	9	77	ADGRB3,PTPRD,NRXN1,LRRTM4,FLRT2,LINGO2,IL1RAPL1,STAU2,IL1RAP
GO: Biological Process	GO:0008038	neuron recognition		6.085e-06	0.02682	0.000506	0.004538	8	59	NCAM2,CNTN6,CNTN5,MYPN,CNTN4,NRCAM,CNTNAP2,ROBO2
GO: Biological Process	GO:2001257	regulation of cation channel activity		9.043e-06	0.03985	0.000738	0.006619	14	203	MYO5A,MEF2C,NRXN1,LRRC7,FGF14,DMD,AKAP7,AKAP6,CACNA2D1,HCN1,GRIA3,GRIA4,JPH1,ASPH
GO: Biological Process	GO:0051640	organelle localization		1.012e-05	0.04458	0.0008105	0.007269	35	944	MYO5A,MAP2,TBC1D5,SYTL2,RABGAP1,LRRC6,ITGA4,F8,BICD1,MAGI2,CDKL5,TBC1D32,NRXN1,BRCA2,SYN1,SYT1,KIF5C,DMD,SCLT1,STX17,DCDC2,CDC42BPA,OFD1,IFT81,PCLO,CEP290,COPG2,CCDC39,KIF3A,CCDC88A,CEP83,CEP70,DOCK7,RIMS1,RIMS2
GO: Biological Process	GO:0007017	microtubule-based process		1.121e-05	0.04941	0.0008824	0.007913	38	1071	ADCY10,SPATA7,MAP9,ATRX,MYO5A,MAP2,PPP1R12A,TBC1D5,RABGAP1,LRRC6,CNTLN,DNAH14,BICD1,CDKL5,TBC1D32,BRCA2,NAV3,KIF5C,SCLT1,DCDC2,CDC42BPA,OFD1,IFT81,KTN1,CEP290,COPG2,CCDC39,KIF3A,NCOR1,SETD2,CCDC88A,SMC3,GCC2,PRKAA2,STAU2,CEP83,CEP70,DOCK7
GO: Biological Process	GO:0099504	synaptic vesicle cycle		1.162e-05	0.05119	0.000898	0.008054	15	236	MAGI2,NRXN1,SYN1,SYT1,FGF14,STXBP5L,STXBP5,PCLO,FCHO2,GRM7,CASK,ROCK1,RIMS1,CADPS2,RIMS2
GO: Biological Process	GO:1990778	protein localization to cell periphery		1.194e-05	0.05263	0.0009075	0.008139	19	360	RAPGEF6,MYO5A,SYTL2,MAGI2,NRXN1,LRRC7,PLS1,EPM2A,DPP10,NECTIN3,FCHO2,ADAM22,CASK,GCC2,KCNIP4,ROCK1,PRKG2,FYB1,LGI1
GO: Biological Process	GO:0098693	regulation of synaptic vesicle cycle		1.244e-05	0.05481	0.000929	0.008332	12	155	MAGI2,NRXN1,SYN1,SYT1,FGF14,STXBP5L,STXBP5,GRM7,CASK,ROCK1,RIMS1,RIMS2
GO: Biological Process	GO:0070593	dendrite self-avoidance		2.105e-05	0.09279	0.001546	0.01387	5	21	CNTN6,CNTN5,MYPN,CNTN4,NRCAM
GO: Biological Process	GO:0051962	positive regulation of nervous system development		2.268e-05	0.09995	0.001638	0.01469	27	664	BRINP3,ADGRB3,BRINP1,MEF2C,MAGI2,CDKL5,BMPR2,PTPRD,NRXN1,LRRTM4,SYT1,LRRC7,FLRT2,DMD,CNTN1,VEGFC,NRCAM,LINGO2,CASK,IL1RAPL1,STAU2,PAK3,ELAVL4,ROBO2,RIMS1,RIMS2,IL1RAP
GO: Biological Process	GO:0042391	regulation of membrane potential		2.341e-05	0.1032	0.001664	0.01492	23	517	GABRB1,GABRB2,KCNH7,MEF2C,NRXN1,KCNJ3,SCN2A,FGF14,DMD,AKAP7,AKAP6,CACNA2D1,NRCAM,HCN1,GRIA3,GRIA4,GRM7,KCNT2,CNTNAP2,CTNNA3,RIMS1,RIMS2,GABRA3
GO: Biological Process	GO:0018105	peptidyl-serine phosphorylation		3.164e-05	0.1394	0.002213	0.01985	17	320	RPS6KA3,RPS6KB1,RIPK2,TLK1,NRXN1,PLCL2,DMD,TLK2,AKT3,VRK2,EPM2A,CAMK4,PRKAA2,DOCK7,ROCK1,PKN2,PRKG2
GO: Biological Process	GO:0072659	protein localization to plasma membrane		3.289e-05	0.145	0.002265	0.02031	16	289	RAPGEF6,MYO5A,SYTL2,NRXN1,LRRC7,PLS1,EPM2A,DPP10,NECTIN3,FCHO2,CASK,GCC2,KCNIP4,ROCK1,PRKG2,FYB1
GO: Biological Process	GO:0000226	microtubule cytoskeleton organization		4.15e-05	0.1829	0.002814	0.02524	31	846	SPATA7,MAP9,ATRX,MAP2,PPP1R12A,TBC1D5,RABGAP1,LRRC6,CNTLN,BICD1,CDKL5,TBC1D32,BRCA2,NAV3,SCLT1,DCDC2,CDC42BPA,OFD1,IFT81,CEP290,CCDC39,KIF3A,NCOR1,SETD2,CCDC88A,SMC3,GCC2,PRKAA2,CEP83,CEP70,DOCK7
GO: Biological Process	GO:0099003	vesicle-mediated transport in synapse		4.492e-05	0.198	0.002999	0.0269	15	265	MAGI2,NRXN1,SYN1,SYT1,FGF14,STXBP5L,STXBP5,PCLO,FCHO2,GRM7,CASK,ROCK1,RIMS1,CADPS2,RIMS2
GO: Biological Process	GO:0048813	dendrite morphogenesis		5.194e-05	0.2289	0.003416	0.03064	12	179	HECW1,MAP2,ADGRB3,CDKL5,PTPRD,FMN1,DCDC2,CASK,IL1RAPL1,STAU2,PAK3,ELAVL4
GO: Biological Process	GO:0045666	positive regulation of neuron differentiation		5.8e-05	0.2556	0.003759	0.03371	21	475	BRINP3,BRINP1,MEF2C,MAGI2,CDKL5,BMPR2,PTPRD,SYT1,LRRC7,DMD,CNTN1,NRCAM,CASK,IL1RAPL1,STAU2,PAK3,ELAVL4,ROBO2,RIMS1,RIMS2,IL1RAP
GO: Biological Process	GO:0097090	presynaptic membrane organization		6.821e-05	0.3006	0.004357	0.03907	4	14	PTPRD,NRXN1,LRRTM4,IL1RAPL1
GO: Biological Process	GO:0022406	membrane docking		7.144e-05	0.3148	0.004498	0.04034	12	185	SYTL2,NRXN1,SYT1,SCLT1,STX17,OFD1,CEP290,CEP83,CEP70,ROCK1,RIMS1,RIMS2
GO: Biological Process	GO:0018209	peptidyl-serine modification		7.763e-05	0.3421	0.004819	0.04322	17	344	RPS6KA3,RPS6KB1,RIPK2,TLK1,NRXN1,PLCL2,DMD,TLK2,AKT3,VRK2,EPM2A,CAMK4,PRKAA2,DOCK7,ROCK1,PKN2,PRKG2
GO: Biological Process	GO:0051648	vesicle localization		8.172e-05	0.3601	0.005002	0.04486	24	599	MYO5A,MAP2,TBC1D5,RABGAP1,LRRC6,ITGA4,F8,MAGI2,CDKL5,TBC1D32,NRXN1,SYN1,KIF5C,SCLT1,DCDC2,OFD1,IFT81,PCLO,CEP290,CCDC39,KIF3A,CCDC88A,CEP83,CEP70
GO: Biological Process	GO:0031503	protein-containing complex localization		8.478e-05	0.3736	0.005118	0.0459	26	678	TBC1D5,RABGAP1,LRRC6,MAGI2,CDKL5,TBC1D32,NRXN1,FIP1L1,LRRC7,KIF5C,SCLT1,AKAP6,THOC1,DCDC2,OFD1,IFT81,CEP290,ADAM22,CCDC39,KIF3A,SETD2,CCDC88A,STAU2,CEP83,CEP70,LGI1
GO: Biological Process	GO:0010921	regulation of phosphatase activity		8.769e-05	0.3865	0.005223	0.04684	12	189	PPP1R12A,SYTL2,RBM26,MEF2C,MAGI2,CSRNP3,BOD1L1,NPNT,EPM2A,ARFGEF3,PPP2R3A,ROCK1
GO: Biological Process	GO:0099558	maintenance of synapse structure		9.234e-05	0.4069	0.005426	0.04866	5	28	ADGRB3,MAGI2,PCLO,RIMS1,RIMS2
GO: Biological Process	GO:0070925	organelle assembly		0.0001102	0.4854	0.006387	0.05728	32	934	ATG4A,MAP9,TBC1D5,RABGAP1,LRRC6,RB1CC1,MEF2C,BICD1,CDKL5,TBC1D32,PTPRD,MYLK3,NRXN1,MYPN,SCLT1,STX17,PLS1,DCDC2,EPM2A,OFD1,IFT81,CEP290,EQTN,CCDC39,KIF3A,NCOR1,CCDC88A,SMC3,PRKAA2,CEP83,CEP70,IL1RAP
GO: Biological Process	GO:0099111	microtubule-based transport		0.0001178	0.519	0.006741	0.06045	22	537	ADCY10,MYO5A,MAP2,TBC1D5,RABGAP1,LRRC6,BICD1,CDKL5,TBC1D32,KIF5C,SCLT1,DCDC2,OFD1,IFT81,CEP290,COPG2,CCDC39,KIF3A,CCDC88A,STAU2,CEP83,CEP70
GO: Biological Process	GO:0050890	cognition		0.0001217	0.5362	0.006874	0.06165	17	357	CHL1,ADGRB3,BRINP1,MEF2C,RTL4,NRXN1,SLC24A2,SCN2A,CYP7B1,DCDC2,EPM2A,AFF2,CAMK4,PAK5,GRM7,CNTNAP2,ELAVL4
GO: Biological Process	GO:0032412	regulation of ion transmembrane transporter activity		0.0001547	0.6816	0.008586	0.077	15	296	HECW1,MYO5A,MEF2C,NRXN1,LRRC7,FGF14,DMD,AKAP7,AKAP6,CACNA2D1,HCN1,GRIA3,GRIA4,JPH1,ASPH
GO: Biological Process	GO:0099640	axo-dendritic protein transport		0.0001559	0.6869	0.008586	0.077	4	17	MYO5A,KIF5C,KIF3A,STAU2
GO: Biological Process	GO:0044087	regulation of cellular component biogenesis		0.0001636	0.7208	0.008899	0.0798	34	1040	MAP2,TBC1D5,ADGRB3,MDGA2,ATP8B1,RABGAP1,MEF2C,TMEFF2,CDKL5,PTPRD,MYLK3,NRXN1,IL1RAPL2,FMN1,LRFN5,LRRTM4,NAV3,FLRT2,MAP3K7,DCDC2,STXBP5,LINGO2,FAF1,IL1RAPL1,CCDC88A,SMC3,PRKAA2,STAU2,PAK3,ROBO2,ROCK1,RIMS1,IL1RAP,EPHA7
GO: Biological Process	GO:0022604	regulation of cell morphogenesis		0.0001697	0.7477	0.009038	0.08105	22	551	HECW1,ARHGAP15,MAP2,MYCBP2,MYO9A,GAS2,ADGRB3,CDKL5,BMPR2,PTPRD,SYT1,NRCAM,LRRC4C,KIF3A,CASK,IL1RAPL1,STAU2,PAK3,ROBO2,RIMS1,RIMS2,EPHA7
GO: Biological Process	GO:0007417	central nervous system development		0.0001702	0.7501	0.009038	0.08105	36	1129	GABRB1,ERBB4,ATRX,MAP2,MYCBP2,RPS6KA3,MDGA2,CNTN6,BMPR2,NRXN1,BRCA2,IL1RAPL2,SYT1,BACE2,UNC5D,TENT2,CNTN1,CNTN4,AKT3,DRP2,AFF2,NRCAM,CEP290,ADAM22,CCDC39,KIF3A,NCOR1,SETD2,UNC5C,CNTNAP2,DOCK7,ROBO2,NRG3,CDH11,EPHA7,SOS1
GO: Biological Process	GO:0048278	vesicle docking		0.0001863	0.8209	0.009773	0.08764	7	71	SYTL2,NRXN1,SYT1,STX17,CEP83,RIMS1,RIMS2
GO: Biological Process	GO:0010976	positive regulation of neuron projection development		0.0001923	0.8473	0.009968	0.0894	17	371	MAGI2,CDKL5,BMPR2,PTPRD,SYT1,LRRC7,DMD,CNTN1,CASK,IL1RAPL1,STAU2,PAK3,ELAVL4,ROBO2,RIMS1,RIMS2,IL1RAP
GO: Biological Process	GO:0140056	organelle localization by membrane tethering		0.000197	0.8683	0.0101	0.09055	11	176	SYTL2,NRXN1,SYT1,SCLT1,STX17,OFD1,CEP290,CEP83,CEP70,RIMS1,RIMS2
GO: Biological Process	GO:0022898	regulation of transmembrane transporter activity		0.0002066	0.9105	0.01047	0.09386	15	304	HECW1,MYO5A,MEF2C,NRXN1,LRRC7,FGF14,DMD,AKAP7,AKAP6,CACNA2D1,HCN1,GRIA3,GRIA4,JPH1,ASPH
GO: Biological Process	GO:0016339	calcium-dependent cell-cell adhesion via plasma membrane cell adhesion molecules		0.0002267	0.9992	0.01135	0.1018	6	52	NRXN1,CDH6,CDH10,CDH11,CDH12,CDH18
GO: Biological Process	GO:0010970	transport along microtubule		0.0002443	1	0.01206	0.1081	21	527	MYO5A,MAP2,TBC1D5,RABGAP1,LRRC6,BICD1,CDKL5,TBC1D32,KIF5C,SCLT1,DCDC2,OFD1,IFT81,CEP290,COPG2,CCDC39,KIF3A,CCDC88A,STAU2,CEP83,CEP70
GO: Biological Process	GO:0048790	maintenance of presynaptic active zone structure		0.0002462	1	0.01206	0.1081	3	8	PCLO,RIMS1,RIMS2
GO: Biological Process	GO:0016079	synaptic vesicle exocytosis		0.0002531	1	0.01214	0.1088	10	152	SYN1,SYT1,STXBP5L,STXBP5,PCLO,GRM7,CASK,RIMS1,CADPS2,RIMS2
GO: Biological Process	GO:0043547	positive regulation of GTPase activity		0.0002534	1	0.01214	0.1088	18	416	ARHGAP42,RALGAPA1,RAPGEF6,ARHGAP15,MYO9A,TBC1D5,ADGRB3,RABGAP1,CDKL5,RABGAP1L,ARHGAP20,RASAL2,ARAP2,STXBP5L,STXBP5,FAM13A,DOCK7,SOS1
GO: Biological Process	GO:0043269	regulation of ion transport		0.0002688	1	0.01274	0.1143	28	812	KCNH7,HECW1,MYO5A,MEF2C,NRXN1,NFATC3,KCNJ3,SCN2A,SYT1,LRRC7,FGF14,DMD,CNTN1,AKAP7,AKAP6,CACNA2D1,AKT3,DPP10,HCN1,GRIA3,GRIA4,GRM7,CASK,JPH1,NCOR1,ASPH,KCNIP4,PRKG2
GO: Biological Process	GO:0098964	anterograde dendritic transport of messenger ribonucleoprotein complex		0.0002855	1	0.01339	0.12	2	2	KIF5C,STAU2
GO: Biological Process	GO:0099643	signal release from synapse		0.0002923	1	0.01342	0.1203	12	215	MEF2C,NRXN1,SYN1,SYT1,STXBP5L,STXBP5,PCLO,GRM7,CASK,RIMS1,CADPS2,RIMS2
GO: Biological Process	GO:0007269	neurotransmitter secretion		0.0002923	1	0.01342	0.1203	12	215	MEF2C,NRXN1,SYN1,SYT1,STXBP5L,STXBP5,PCLO,GRM7,CASK,RIMS1,CADPS2,RIMS2
GO: Biological Process	GO:0097091	synaptic vesicle clustering		0.0003049	1	0.01385	0.1242	4	20	MAGI2,NRXN1,SYN1,PCLO
GO: Biological Process	GO:0050775	positive regulation of dendrite morphogenesis		0.0003095	1	0.01392	0.1248	6	55	CDKL5,PTPRD,CASK,IL1RAPL1,STAU2,PAK3
GO: Biological Process	GO:0007611	learning or memory		0.0003233	1	0.01439	0.1291	15	317	ADGRB3,BRINP1,MEF2C,NRXN1,SLC24A2,SCN2A,CYP7B1,DCDC2,EPM2A,AFF2,CAMK4,PAK5,GRM7,CNTNAP2,ELAVL4
GO: Biological Process	GO:0007610	behavior		0.0003281	1	0.01446	0.1297	26	739	CHL1,MYO5A,RPS6KB1,ADGRB3,ETV1,BRINP1,GCNT4,MEF2C,PGR,NRXN1,SLC24A2,HPGDS,SCN2A,CYP7B1,FGF14,DCDC2,EPM2A,AFF2,CAMK4,PAK5,GRM7,ADAM22,NCOR1,CNTNAP2,ELAVL4,MBD5
GO: Biological Process	GO:0035418	protein localization to synapse		0.0003447	1	0.01482	0.1329	8	103	MAGI2,NRXN1,LRRC7,KIF5C,PCLO,ADAM22,STAU2,LGI1
GO: Biological Process	GO:0018193	peptidyl-amino acid modification		0.0003458	1	0.01482	0.1329	40	1352	TET2,ERBB4,ATRX,CWC27,RPS6KA3,RPS6KB1,RIPK2,KMT2E,TLK1,NRXN1,BRCA2,PLCL2,DMD,MAP3K7,CNTN1,VEGFC,TLK2,AKT3,VRK2,EPM2A,CDC42BPA,DPY19L1,CAMK4,FBXO11,SUV39H2,AGBL4,SETD2,SETD5,PRKAA2,ASPH,DOCK7,NCOA7,ROCK1,UGGT2,PKN2,PRKG2,NRG3,FUT8,EPHA7,FBXW7
GO: Biological Process	GO:0030705	cytoskeleton-dependent intracellular transport		0.0003464	1	0.01482	0.1329	21	541	MYO5A,MAP2,TBC1D5,RABGAP1,LRRC6,BICD1,CDKL5,TBC1D32,KIF5C,SCLT1,DCDC2,OFD1,IFT81,CEP290,COPG2,CCDC39,KIF3A,CCDC88A,STAU2,CEP83,CEP70
GO: Biological Process	GO:0032409	regulation of transporter activity		0.0003571	1	0.01513	0.1357	15	320	HECW1,MYO5A,MEF2C,NRXN1,LRRC7,FGF14,DMD,AKAP7,AKAP6,CACNA2D1,HCN1,GRIA3,GRIA4,JPH1,ASPH
GO: Biological Process	GO:1904062	regulation of cation transmembrane transport		0.0003864	1	0.01622	0.1454	17	394	HECW1,MYO5A,MEF2C,NRXN1,LRRC7,FGF14,DMD,AKAP7,AKAP6,CACNA2D1,DPP10,HCN1,GRIA3,GRIA4,JPH1,ASPH,KCNIP4
GO: Biological Process	GO:0050773	regulation of dendrite development		0.0003981	1	0.01655	0.1484	11	191	HECW1,ADGRB3,MEF2C,CDKL5,PTPRD,CASK,IL1RAPL1,STAU2,PAK3,ELAVL4,IL1RAP
GO: Biological Process	GO:0099118	microtubule-based protein transport		0.000432	1	0.01763	0.1581	18	435	MYO5A,TBC1D5,RABGAP1,LRRC6,CDKL5,TBC1D32,KIF5C,SCLT1,DCDC2,OFD1,IFT81,CEP290,CCDC39,KIF3A,CCDC88A,STAU2,CEP83,CEP70
GO: Biological Process	GO:0098840	protein transport along microtubule		0.000432	1	0.01763	0.1581	18	435	MYO5A,TBC1D5,RABGAP1,LRRC6,CDKL5,TBC1D32,KIF5C,SCLT1,DCDC2,OFD1,IFT81,CEP290,CCDC39,KIF3A,CCDC88A,STAU2,CEP83,CEP70
GO: Biological Process	GO:0007018	microtubule-based movement		0.0004391	1	0.01775	0.1592	24	671	ADCY10,MYO5A,MAP2,TBC1D5,RABGAP1,LRRC6,DNAH14,BICD1,CDKL5,TBC1D32,KIF5C,SCLT1,DCDC2,OFD1,IFT81,KTN1,CEP290,COPG2,CCDC39,KIF3A,CCDC88A,STAU2,CEP83,CEP70
GO: Biological Process	GO:0050769	positive regulation of neurogenesis		0.0004553	1	0.01822	0.1634	22	592	BRINP3,BRINP1,MEF2C,MAGI2,CDKL5,BMPR2,PTPRD,SYT1,LRRC7,DMD,CNTN1,VEGFC,NRCAM,CASK,IL1RAPL1,STAU2,PAK3,ELAVL4,ROBO2,RIMS1,RIMS2,IL1RAP
GO: Biological Process	GO:0035303	regulation of dephosphorylation		0.0004589	1	0.01822	0.1634	12	226	PPP1R12A,SYTL2,RBM26,MEF2C,MAGI2,CSRNP3,BOD1L1,NPNT,EPM2A,ARFGEF3,PPP2R3A,ROCK1
GO: Biological Process	GO:1900006	positive regulation of dendrite development		0.0004748	1	0.0186	0.1668	8	108	CDKL5,PTPRD,CASK,IL1RAPL1,STAU2,PAK3,ELAVL4,IL1RAP
GO: Biological Process	GO:0016358	dendrite development		0.0004768	1	0.0186	0.1668	14	294	HECW1,MAP2,ADGRB3,MEF2C,CDKL5,PTPRD,FMN1,DCDC2,CASK,IL1RAPL1,STAU2,PAK3,ELAVL4,IL1RAP
GO: Biological Process	GO:0060078	regulation of postsynaptic membrane potential		0.0005105	1	0.01973	0.177	10	166	GABRB1,GABRB2,MEF2C,NRXN1,FGF14,GRIA3,GRIA4,RIMS1,RIMS2,GABRA3
GO: Biological Process	GO:0031346	positive regulation of cell projection organization		0.0005195	1	0.01991	0.1785	19	480	MAGI2,CDKL5,BMPR2,PTPRD,NAV3,SYT1,LRRC7,DMD,CNTN1,CASK,IL1RAPL1,CCDC88A,STAU2,PAK3,ELAVL4,ROBO2,RIMS1,RIMS2,IL1RAP
GO: Biological Process	GO:0017157	regulation of exocytosis		0.0005317	1	0.02014	0.1806	13	263	MYO5A,EXPH5,SYN1,SYT1,STXBP5L,STXBP5,PCLO,GRM7,CASK,IL1RAPL1,RIMS1,CADPS2,RIMS2
GO: Biological Process	GO:2000300	regulation of synaptic vesicle exocytosis		0.0005368	1	0.02014	0.1806	8	110	SYN1,SYT1,STXBP5L,STXBP5,GRM7,CASK,RIMS1,RIMS2
GO: Biological Process	GO:0007010	cytoskeleton organization		0.0005393	1	0.02014	0.1806	46	1663	SPATA7,MAP9,ATRX,MAP2,MYCBP2,PPP1R12A,TBC1D5,RABGAP1,LRRC6,CNTLN,MEF2C,TMEFF2,BICD1,CDKL5,TBC1D32,MYLK3,BRCA2,FMN1,MYPN,NAV3,DMD,SCLT1,PLS1,DCDC2,SORBS2,CDC42BPA,OFD1,IFT81,PCLO,PAK5,CEP290,MYO1B,CCDC39,KIF3A,NCOR1,SETD2,CCDC88A,SMC3,GCC2,PRKAA2,STAU2,CEP83,CEP70,DOCK7,PAK3,ROCK1
GO: Biological Process	GO:0010720	positive regulation of cell development		0.0006	1	0.02222	0.1993	24	686	BRINP3,BRINP1,MEF2C,MAGI2,CDKL5,BMPR2,PTPRD,MYLK3,SYT1,LRRC7,DMD,CNTN1,AKAP6,VEGFC,NRCAM,CASK,IL1RAPL1,STAU2,PAK3,ELAVL4,ROBO2,RIMS1,RIMS2,IL1RAP
GO: Biological Process	GO:0071695	anatomical structure maturation		0.0006112	1	0.02244	0.2013	11	201	MYO5A,ADGRB3,PGR,MBTPS2,NRXN1,BRCA2,RXFP2,SCLT1,NRCAM,CNTNAP2,ANKRD17
GO: Biological Process	GO:0048814	regulation of dendrite morphogenesis		0.0006807	1	0.02479	0.2223	8	114	HECW1,ADGRB3,CDKL5,PTPRD,CASK,IL1RAPL1,STAU2,PAK3
GO: Biological Process	GO:0099545	trans-synaptic signaling by trans-synaptic complex		0.0006988	1	0.02484	0.2227	3	11	PTPRD,IL1RAPL1,IL1RAP
GO: Biological Process	GO:1990709	presynaptic active zone organization		0.0006988	1	0.02484	0.2227	3	11	PCLO,RIMS1,RIMS2
GO: Biological Process	GO:0097105	presynaptic membrane assembly		0.0006988	1	0.02484	0.2227	3	11	PTPRD,NRXN1,IL1RAPL1
GO: Biological Process	GO:0097479	synaptic vesicle localization		0.0007056	1	0.02488	0.2231	6	64	MAP2,MAGI2,NRXN1,SYN1,KIF5C,PCLO
GO: Biological Process	GO:2000310	regulation of NMDA receptor activity		0.0007362	1	0.02575	0.2309	5	43	MEF2C,NRXN1,LRRC7,GRIA3,GRIA4
GO: Biological Process	GO:0046928	regulation of neurotransmitter secretion		0.0007792	1	0.02704	0.2425	9	145	MEF2C,SYN1,SYT1,STXBP5L,STXBP5,GRM7,CASK,RIMS1,RIMS2
GO: Biological Process	GO:1902115	regulation of organelle assembly		0.0008094	1	0.02787	0.2499	12	241	TBC1D5,RABGAP1,MEF2C,CDKL5,PTPRD,MYLK3,NRXN1,DCDC2,CCDC88A,SMC3,PRKAA2,IL1RAP
GO: Biological Process	GO:0044331	cell-cell adhesion mediated by cadherin		0.0008193	1	0.02799	0.251	5	44	CDH6,CDH10,CDH11,CDH12,CDH18
GO: Biological Process	GO:0034765	regulation of ion transmembrane transport		0.0008347	1	0.0283	0.2538	20	539	KCNH7,HECW1,MYO5A,MEF2C,NRXN1,KCNJ3,SCN2A,LRRC7,FGF14,DMD,AKAP7,AKAP6,CACNA2D1,DPP10,HCN1,GRIA3,GRIA4,JPH1,ASPH,KCNIP4
GO: Biological Process	GO:0051650	establishment of vesicle localization		0.0008504	1	0.02858	0.2563	21	580	MYO5A,MAP2,TBC1D5,RABGAP1,LRRC6,ITGA4,F8,CDKL5,TBC1D32,KIF5C,SCLT1,DCDC2,OFD1,IFT81,PCLO,CEP290,CCDC39,KIF3A,CCDC88A,CEP83,CEP70
GO: Biological Process	GO:1903827	regulation of cellular protein localization		0.000856	1	0.02858	0.2563	22	621	ERBB4,MYO5A,MAP2,ERLEC1,BICD1,MAGI2,NRXN1,ASTN2,GPC5,PLS1,EPM2A,SORBS2,DPP10,CAMK4,CEP290,KIF3A,SETD2,CCDC88A,GCC2,PRKAA2,ASPH,FBXW7
GO: Biological Process	GO:0016082	synaptic vesicle priming		0.0008691	1	0.0288	0.2583	4	26	STXBP5,RIMS1,CADPS2,RIMS2
GO: Biological Process	GO:0060287	epithelial cilium movement involved in determination of left/right asymmetry		0.0009203	1	0.03027	0.2714	3	12	LRRC6,OFD1,CCDC39
GO: Biological Process	GO:0034332	adherens junction organization		0.0009916	1	0.03237	0.2903	9	150	CADM2,FMN1,NECTIN3,ROCK1,CDH6,CDH10,CDH11,CDH12,CDH18
GO: Biological Process	GO:0043113	receptor clustering		0.001052	1	0.03409	0.3057	6	69	ITGA4,MAGI2,NRXN1,LRRTM4,LRRC7,SORBS2
GO: Biological Process	GO:0051656	establishment of organelle localization		0.001135	1	0.0365	0.3274	26	804	MYO5A,MAP2,TBC1D5,RABGAP1,LRRC6,ITGA4,F8,BICD1,CDKL5,TBC1D32,BRCA2,KIF5C,SCLT1,DCDC2,CDC42BPA,OFD1,IFT81,PCLO,CEP290,COPG2,CCDC39,KIF3A,CCDC88A,CEP83,CEP70,DOCK7
GO: Biological Process	GO:0061669	spontaneous neurotransmitter secretion		0.001182	1	0.03746	0.336	3	13	SYT1,RIMS1,RIMS2
GO: Biological Process	GO:0098814	spontaneous synaptic transmission		0.001182	1	0.03746	0.336	3	13	SYT1,RIMS1,RIMS2
GO: Biological Process	GO:0010769	regulation of cell morphogenesis involved in differentiation		0.001192	1	0.03751	0.3364	15	360	HECW1,MAP2,MYCBP2,ADGRB3,CDKL5,BMPR2,PTPRD,NRCAM,LRRC4C,CASK,IL1RAPL1,STAU2,PAK3,ROBO2,EPHA7
GO: Biological Process	GO:0097120	receptor localization to synapse		0.001222	1	0.03796	0.3405	6	71	MAGI2,NRXN1,LRRC7,KIF5C,ADAM22,LGI1
GO: Biological Process	GO:0018023	peptidyl-lysine trimethylation		0.001223	1	0.03796	0.3405	5	48	TET2,ATRX,KMT2E,SUV39H2,SETD2
GO: Biological Process	GO:0051130	positive regulation of cellular component organization		0.001247	1	0.03843	0.3447	38	1351	ATRX,TBC1D5,ADGRB3,KMT2E,SMC5,BICD1,MAGI2,CDKL5,BMPR2,PTPRD,MYLK3,NRXN1,FMN1,LRRTM4,NAV3,SYT1,LRRC7,FLRT2,DMD,CNTN1,LINGO2,FAF1,KIF3A,CASK,IL1RAPL1,NCOR1,CCDC88A,STAU2,PKIB,PAK3,ELAVL4,ROBO2,ROCK1,MPHOSPH8,RIMS1,RIMS2,IL1RAP,FBXW7
GO: Biological Process	GO:0034762	regulation of transmembrane transport		0.001285	1	0.03933	0.3527	22	641	ERBB4,KCNH7,HECW1,MYO5A,RPS6KB1,MEF2C,NRXN1,KCNJ3,SCN2A,LRRC7,FGF14,DMD,AKAP7,AKAP6,CACNA2D1,DPP10,HCN1,GRIA3,GRIA4,JPH1,ASPH,KCNIP4
GO: Biological Process	GO:1901019	regulation of calcium ion transmembrane transporter activity		0.001319	1	0.04009	0.3595	7	98	MYO5A,FGF14,DMD,AKAP6,CACNA2D1,JPH1,ASPH
GO: Biological Process	GO:0072657	protein localization to membrane		0.001363	1	0.04115	0.3691	23	686	RAPGEF6,MYO5A,SYTL2,ITGA4,MAGI2,NRXN1,LRRTM4,LRRC7,GPC5,PLS1,EPM2A,SORBS2,DPP10,NECTIN3,FCHO2,ADAM22,CASK,GCC2,KCNIP4,ROCK1,PRKG2,FYB1,LGI1
GO: Biological Process	GO:0099151	regulation of postsynaptic density assembly		0.001485	1	0.04447	0.3988	3	14	PTPRD,NRXN1,IL1RAP
GO: Biological Process	GO:0001508	action potential		0.001493	1	0.04447	0.3988	10	191	KCNJ3,SCN2A,DMD,AKAP6,CACNA2D1,NRCAM,HCN1,GRM7,CNTNAP2,CTNNA3
GO: Biological Process	GO:0007214	gamma-aminobutyric acid signaling pathway		0.001511	1	0.0447	0.4009	4	30	GABRB1,GABRB2,PLCL2,GABRA3
GO: Biological Process	GO:0050919	negative chemotaxis		0.001611	1	0.04732	0.4244	5	51	FLRT2,UNC5C,ROBO2,NRG3,EPHA7
GO: Biological Process	GO:0097118	neuroligin clustering involved in postsynaptic membrane assembly		0.001647	1	0.04806	0.431	2	4	MAGI2,NRXN1
GO: Cellular Component	GO:0045202	synapse		6.22e-20	3.993e-17	3.993e-17	2.812e-16	77	1482	GABRB1,GABRB2,TANC2,ERBB4,MYO5A,MAP2,MYO9A,RPS6KB1,ADGRB3,MDGA2,CHRM3,MEF2C,CADM2,CNTN6,PGR,MAGI2,CDKL5,BMPR2,PTPRD,NRXN1,IL1RAPL2,LRFN5,KCNJ3,CNTN5,SCN2A,LRRTM4,SYN1,SYT1,LRRC7,FGF14,FLRT2,DMD,MAP3K7,CNTN1,AKAP7,CACNA2D1,SORBS2,DRP2,NRCAM,STXBP5L,DTNA,CAMK4,STXBP5,HCN1,PCLO,PAK5,GRIA3,GRIA4,NBEA,CNKSR2,LRRC4C,NECTIN3,FCHO2,GRM7,ADAM22,KIF3A,CASK,IL1RAPL1,SRGN,UNC5C,CPEB4,CNTNAP2,PAK3,ELAVL4,ROCK…
GO: Cellular Component	GO:0098794	postsynapse		6.694e-17	4.297e-14	2.149e-14	1.513e-13	52	825	GABRB1,GABRB2,TANC2,ERBB4,MYO5A,MAP2,ADGRB3,CHRM3,MEF2C,PGR,MAGI2,CDKL5,BMPR2,PTPRD,NRXN1,LRFN5,LRRTM4,SYN1,SYT1,LRRC7,DMD,MAP3K7,CNTN1,AKAP7,CACNA2D1,SORBS2,DRP2,NRCAM,CAMK4,STXBP5,PCLO,GRIA3,GRIA4,NBEA,CNKSR2,LRRC4C,NECTIN3,GRM7,ADAM22,CASK,IL1RAPL1,SRGN,CPEB4,PAK3,RIMS1,CADPS2,RIMS2,SLC16A7,CDH10,GABRA3,EPHA7,SOS1
GO: Cellular Component	GO:0098978	glutamatergic synapse		2.726e-16	1.75e-13	5.833e-14	4.108e-13	40	511	TANC2,ERBB4,MYO5A,MDGA2,CHRM3,MAGI2,CDKL5,PTPRD,NRXN1,IL1RAPL2,LRFN5,SCN2A,LRRTM4,SYT1,LRRC7,CACNA2D1,DRP2,NRCAM,CAMK4,PCLO,GRIA3,GRIA4,CNKSR2,LRRC4C,GRM7,ADAM22,IL1RAPL1,SRGN,PAK3,ELAVL4,RIMS1,NRG3,CADPS2,RIMS2,IL1RAP,SLC16A7,CDH10,CDH11,LGI1,EPHA7
GO: Cellular Component	GO:0097060	synaptic membrane		5.414e-16	3.476e-13	8.69e-14	6.12e-13	41	548	GABRB1,GABRB2,ERBB4,CHRM3,CNTN6,MAGI2,PTPRD,NRXN1,LRFN5,KCNJ3,CNTN5,SCN2A,LRRTM4,SYT1,LRRC7,DMD,CNTN1,CACNA2D1,DRP2,NRCAM,STXBP5,GRIA3,GRIA4,NBEA,CNKSR2,LRRC4C,NECTIN3,FCHO2,GRM7,ADAM22,CASK,IL1RAPL1,CPEB4,CNTNAP2,RIMS1,CADPS2,RIMS2,SLC16A7,CDH10,GABRA3,EPHA7
GO: Cellular Component	GO:0043005	neuron projection		1.788e-15	1.148e-12	2.296e-13	1.617e-12	73	1624	CHL1,GABRB1,GABRB2,ADCY10,SPATA7,PCSK2,MAP9,BRINP3,MYO5A,MAP2,MYCBP2,MYO9A,OPN3,RPS6KB1,NCAM2,BRINP1,ATP8B1,ITGA4,CHRM3,CADM2,CNTN6,PGR,MAGI2,CDKL5,BMPR2,PTPRD,NRXN1,CNTN5,SCN2A,MYPN,SYN1,SYT1,LRRC7,FLRT2,KIF5C,EEA1,DMD,AKAP7,CNTN4,DCDC2,EPM2A,SORBS2,DRP2,NRCAM,DTNA,STXBP5,HCN1,PCLO,CEP290,GRIA3,GRIA4,CNKSR2,NECTIN3,GRM7,ADAM22,KIF3A,CASK,IL1RAPL1,UNC5C,CPEB4,PRKAA2,STAU2,CNTNAP2,DOCK7,ELAVL4,KCN…
GO: Cellular Component	GO:0030424	axon		4.083e-15	2.621e-12	4.369e-13	3.077e-12	49	817	ADCY10,MAP9,MYO5A,MAP2,MYCBP2,MYO9A,NCAM2,ITGA4,CHRM3,CADM2,CNTN6,PGR,CDKL5,PTPRD,NRXN1,CNTN5,SCN2A,MYPN,SYN1,SYT1,LRRC7,KIF5C,EEA1,AKAP7,CNTN4,NRCAM,DTNA,STXBP5,HCN1,PCLO,GRIA3,GRIA4,NECTIN3,GRM7,ADAM22,KIF3A,IL1RAPL1,UNC5C,CPEB4,PRKAA2,STAU2,CNTNAP2,DOCK7,ELAVL4,ROBO2,SLC16A7,PCDH9,UNC80,EPHA7
GO: Cellular Component	GO:0098984	neuron to neuron synapse		3.108e-14	1.995e-11	2.85e-12	2.007e-11	35	452	TANC2,ERBB4,MAP2,CHRM3,MAGI2,CDKL5,BMPR2,PTPRD,LRFN5,LRRTM4,SYN1,SYT1,LRRC7,MAP3K7,AKAP7,SORBS2,DRP2,NRCAM,STXBP5,PCLO,GRIA3,GRIA4,CNKSR2,LRRC4C,NECTIN3,GRM7,ADAM22,CASK,IL1RAPL1,CPEB4,PAK3,RIMS1,SLC16A7,EPHA7,SOS1
GO: Cellular Component	GO:0099240	intrinsic component of synaptic membrane		4.761e-14	3.057e-11	3.821e-12	2.691e-11	26	244	GABRB2,ERBB4,CHRM3,CNTN6,PTPRD,NRXN1,LRFN5,KCNJ3,CNTN5,SCN2A,LRRTM4,LRRC7,CNTN1,CACNA2D1,NRCAM,GRIA3,GRIA4,LRRC4C,NECTIN3,GRM7,ADAM22,IL1RAPL1,SLC16A7,CDH10,GABRA3,EPHA7
GO: Cellular Component	GO:0099572	postsynaptic specialization		5.577e-14	3.581e-11	3.979e-12	2.802e-11	35	461	GABRB2,TANC2,ERBB4,MAP2,CHRM3,MAGI2,CDKL5,BMPR2,LRFN5,LRRTM4,SYN1,LRRC7,MAP3K7,SORBS2,DRP2,NRCAM,PCLO,GRIA3,GRIA4,CNKSR2,LRRC4C,NECTIN3,GRM7,ADAM22,CASK,IL1RAPL1,SRGN,CPEB4,PAK3,RIMS1,SLC16A7,CDH10,GABRA3,EPHA7,SOS1
GO: Cellular Component	GO:0099060	integral component of postsynaptic specialization membrane		1.427e-12	9.163e-10	9.163e-11	6.453e-10	17	105	GABRB2,ERBB4,CHRM3,LRFN5,LRRTM4,LRRC7,NRCAM,GRIA3,GRIA4,LRRC4C,NECTIN3,ADAM22,IL1RAPL1,SLC16A7,CDH10,GABRA3,EPHA7
GO: Cellular Component	GO:0098948	intrinsic component of postsynaptic specialization membrane		3.63e-12	2.33e-09	2.118e-10	1.492e-09	17	111	GABRB2,ERBB4,CHRM3,LRFN5,LRRTM4,LRRC7,NRCAM,GRIA3,GRIA4,LRRC4C,NECTIN3,ADAM22,IL1RAPL1,SLC16A7,CDH10,GABRA3,EPHA7
GO: Cellular Component	GO:0032279	asymmetric synapse		5e-12	3.21e-09	2.469e-10	1.739e-09	31	426	TANC2,ERBB4,MAP2,CHRM3,MAGI2,CDKL5,BMPR2,LRFN5,LRRTM4,SYN1,LRRC7,MAP3K7,SORBS2,DRP2,NRCAM,PCLO,GRIA3,GRIA4,CNKSR2,LRRC4C,NECTIN3,GRM7,ADAM22,CASK,IL1RAPL1,CPEB4,PAK3,RIMS1,SLC16A7,EPHA7,SOS1
GO: Cellular Component	GO:0014069	postsynaptic density		5e-12	3.21e-09	2.469e-10	1.739e-09	31	426	TANC2,ERBB4,MAP2,CHRM3,MAGI2,CDKL5,BMPR2,LRFN5,LRRTM4,SYN1,LRRC7,MAP3K7,SORBS2,DRP2,NRCAM,PCLO,GRIA3,GRIA4,CNKSR2,LRRC4C,NECTIN3,GRM7,ADAM22,CASK,IL1RAPL1,CPEB4,PAK3,RIMS1,SLC16A7,EPHA7,SOS1
GO: Cellular Component	GO:0099061	integral component of postsynaptic density membrane		1.044e-11	6.701e-09	4.551e-10	3.205e-09	14	72	ERBB4,CHRM3,LRFN5,LRRTM4,LRRC7,NRCAM,GRIA3,GRIA4,LRRC4C,NECTIN3,ADAM22,IL1RAPL1,SLC16A7,EPHA7
GO: Cellular Component	GO:0099634	postsynaptic specialization membrane		1.063e-11	6.826e-09	4.551e-10	3.205e-09	18	136	GABRB2,ERBB4,CHRM3,LRFN5,LRRTM4,LRRC7,NRCAM,GRIA3,GRIA4,CNKSR2,LRRC4C,NECTIN3,ADAM22,IL1RAPL1,SLC16A7,CDH10,GABRA3,EPHA7
GO: Cellular Component	GO:0099699	integral component of synaptic membrane		2.703e-11	1.735e-08	1.085e-09	7.638e-09	22	226	GABRB2,ERBB4,CHRM3,PTPRD,NRXN1,LRFN5,KCNJ3,SCN2A,LRRTM4,LRRC7,NRCAM,GRIA3,GRIA4,LRRC4C,NECTIN3,GRM7,ADAM22,IL1RAPL1,SLC16A7,CDH10,GABRA3,EPHA7
GO: Cellular Component	GO:0099146	intrinsic component of postsynaptic density membrane		3.271e-11	2.1e-08	1.235e-09	8.7e-09	14	78	ERBB4,CHRM3,LRFN5,LRRTM4,LRRC7,NRCAM,GRIA3,GRIA4,LRRC4C,NECTIN3,ADAM22,IL1RAPL1,SLC16A7,EPHA7
GO: Cellular Component	GO:0098839	postsynaptic density membrane		5.122e-11	3.288e-08	1.827e-09	1.287e-08	15	96	ERBB4,CHRM3,LRFN5,LRRTM4,LRRC7,NRCAM,GRIA3,GRIA4,CNKSR2,LRRC4C,NECTIN3,ADAM22,IL1RAPL1,SLC16A7,EPHA7
GO: Cellular Component	GO:0098936	intrinsic component of postsynaptic membrane		1.416e-10	9.089e-08	4.784e-09	3.369e-08	19	179	GABRB2,ERBB4,CHRM3,LRFN5,LRRTM4,LRRC7,CNTN1,CACNA2D1,NRCAM,GRIA3,GRIA4,LRRC4C,NECTIN3,ADAM22,IL1RAPL1,SLC16A7,CDH10,GABRA3,EPHA7
GO: Cellular Component	GO:0045211	postsynaptic membrane		1.841e-10	1.182e-07	5.773e-09	4.066e-08	28	405	GABRB1,GABRB2,ERBB4,CHRM3,MAGI2,LRFN5,LRRTM4,LRRC7,DMD,CNTN1,CACNA2D1,DRP2,NRCAM,GRIA3,GRIA4,NBEA,CNKSR2,LRRC4C,NECTIN3,GRM7,ADAM22,IL1RAPL1,CPEB4,CADPS2,SLC16A7,CDH10,GABRA3,EPHA7
GO: Cellular Component	GO:0097447	dendritic tree		1.978e-10	1.27e-07	5.773e-09	4.066e-08	40	779	CHL1,GABRB1,ADCY10,PCSK2,BRINP3,MYO5A,MAP2,BRINP1,CHRM3,PGR,MAGI2,CDKL5,BMPR2,PTPRD,SYN1,SYT1,LRRC7,KIF5C,AKAP7,EPM2A,SORBS2,DRP2,STXBP5,HCN1,PCLO,GRIA3,GRIA4,NECTIN3,GRM7,CASK,IL1RAPL1,UNC5C,CPEB4,PRKAA2,STAU2,CNTNAP2,ELAVL4,KCNIP4,SLC16A7,EPHA7
GO: Cellular Component	GO:0030425	dendrite		1.978e-10	1.27e-07	5.773e-09	4.066e-08	40	779	CHL1,GABRB1,ADCY10,PCSK2,BRINP3,MYO5A,MAP2,BRINP1,CHRM3,PGR,MAGI2,CDKL5,BMPR2,PTPRD,SYN1,SYT1,LRRC7,KIF5C,AKAP7,EPM2A,SORBS2,DRP2,STXBP5,HCN1,PCLO,GRIA3,GRIA4,NECTIN3,GRM7,CASK,IL1RAPL1,UNC5C,CPEB4,PRKAA2,STAU2,CNTNAP2,ELAVL4,KCNIP4,SLC16A7,EPHA7
GO: Cellular Component	GO:0042734	presynaptic membrane		4.554e-10	2.923e-07	1.271e-08	8.951e-08	20	214	ERBB4,CHRM3,CNTN6,PTPRD,NRXN1,KCNJ3,CNTN5,SCN2A,SYT1,CNTN1,CACNA2D1,STXBP5,GRIA3,FCHO2,GRM7,CASK,RIMS1,CADPS2,RIMS2,CDH10
GO: Cellular Component	GO:0036477	somatodendritic compartment		5.878e-10	3.774e-07	1.572e-08	1.107e-07	48	1096	CHL1,GABRB1,ADCY10,PCSK2,PDE1A,BRINP3,MYO5A,MAP2,BRINP1,ITGA4,CHRM3,CADM2,PGR,MAGI2,CDKL5,BMPR2,PTPRD,NRXN1,SYN1,SYT1,ASTN2,LRRC7,KIF5C,AKAP7,EPM2A,SORBS2,DRP2,STXBP5,HCN1,PCLO,GRIA3,GRIA4,CNKSR2,NECTIN3,GRM7,KIF3A,CASK,IL1RAPL1,UNC5C,CPEB4,PRKAA2,STAU2,CNTNAP2,ELAVL4,KCNIP4,SLC16A7,EPHA7,SOS1
GO: Cellular Component	GO:0030054	cell junction		1.206e-09	7.742e-07	3.097e-08	2.181e-07	54	1352	GABRB1,GABRB2,DCAF6,MYO9A,PPP1R12A,RPS6KB1,CD46,ITGA4,SMC5,CHRM3,CADM2,MAGI2,FAP,BMPR2,NRXN1,FMN1,SCN2A,LRRTM4,SYN1,SYT1,LRRC7,FLRT2,DMD,AKAP6,SORBS2,CDC42BPA,DRP2,DTNA,STXBP5,PCLO,GRIA3,GRIA4,NBEA,LRRC4C,NECTIN3,CASK,UNC5C,CPEB4,CNTNAP2,CTNNA3,DOCK7,PKN2,RIMS1,CADPS2,RIMS2,FYB1,CDH6,PCDH9,CDH10,CDH11,CDH12,CDH18,LGI1,GABRA3
GO: Cellular Component	GO:0098982	GABA-ergic synapse		2.23e-09	1.432e-06	5.507e-08	3.878e-07	14	106	GABRB1,GABRB2,ERBB4,MDGA2,MAGI2,NRXN1,LRFN5,CNTN5,CAMK4,GRM7,RIMS1,RIMS2,CDH10,GABRA3
GO: Cellular Component	GO:0099055	integral component of postsynaptic membrane		3.365e-09	2.16e-06	8e-08	5.634e-07	17	170	GABRB2,ERBB4,CHRM3,LRFN5,LRRTM4,LRRC7,NRCAM,GRIA3,GRIA4,LRRC4C,NECTIN3,ADAM22,IL1RAPL1,SLC16A7,CDH10,GABRA3,EPHA7
GO: Cellular Component	GO:0150034	distal axon		3.549e-09	2.278e-06	8.136e-08	5.73e-07	27	432	ADCY10,MYO5A,MAP2,MYO9A,ITGA4,CHRM3,PGR,CDKL5,PTPRD,NRXN1,SYT1,KIF5C,AKAP7,STXBP5,HCN1,PCLO,GRIA3,GRIA4,NECTIN3,GRM7,UNC5C,CPEB4,DOCK7,ELAVL4,SLC16A7,PCDH9,EPHA7
GO: Cellular Component	GO:0098793	presynapse		5.598e-09	3.594e-06	1.239e-07	8.728e-07	35	699	ERBB4,MYO5A,CHRM3,MEF2C,CNTN6,PGR,MAGI2,PTPRD,NRXN1,KCNJ3,CNTN5,SCN2A,SYN1,SYT1,FGF14,CNTN1,AKAP7,CACNA2D1,STXBP5L,STXBP5,HCN1,PCLO,GRIA3,GRIA4,NECTIN3,FCHO2,GRM7,CASK,ROCK1,RIMS1,CADPS2,RIMS2,SLC16A7,CDH10,EPHA7
GO: Cellular Component	GO:0043025	neuronal cell body		1.845e-07	0.0001185	3.949e-06	2.781e-05	33	732	ADCY10,PCSK2,PDE1A,BRINP3,MYO5A,MAP2,BRINP1,ITGA4,CADM2,PGR,BMPR2,NRXN1,ASTN2,KIF5C,EPM2A,SORBS2,DRP2,HCN1,PCLO,GRIA3,GRIA4,CNKSR2,GRM7,KIF3A,CASK,UNC5C,PRKAA2,STAU2,CNTNAP2,ELAVL4,KCNIP4,EPHA7,SOS1
GO: Cellular Component	GO:0098889	intrinsic component of presynaptic membrane		2.416e-07	0.0001551	5.004e-06	3.524e-05	13	130	ERBB4,CHRM3,CNTN6,PTPRD,NRXN1,KCNJ3,CNTN5,SCN2A,CNTN1,CACNA2D1,GRIA3,GRM7,CDH10
GO: Cellular Component	GO:0044297	cell body		2.287e-06	0.001468	4.588e-05	0.0003231	33	820	ADCY10,PCSK2,PDE1A,BRINP3,MYO5A,MAP2,BRINP1,ITGA4,CADM2,PGR,BMPR2,NRXN1,ASTN2,KIF5C,EPM2A,SORBS2,DRP2,HCN1,PCLO,GRIA3,GRIA4,CNKSR2,GRM7,KIF3A,CASK,UNC5C,PRKAA2,STAU2,CNTNAP2,ELAVL4,KCNIP4,EPHA7,SOS1
GO: Cellular Component	GO:0098685	Schaffer collateral - CA1 synapse		2.921e-06	0.001875	5.683e-05	0.0004002	11	114	MYO5A,PTPRD,NRXN1,SYN1,STXBP5,LRRC4C,CASK,SRGN,SLC16A7,CDH11,EPHA7
GO: Cellular Component	GO:0031226	intrinsic component of plasma membrane		4.752e-06	0.003051	8.973e-05	0.0006319	55	1790	GABRB1,GABRB2,ERBB4,KCNH7,OPN3,ADGRB3,CD46,ATP8B1,ITGA4,CHRM3,CNTN6,ADGRL4,BMPR2,PTPRD,NRXN1,SLC24A2,LRFN5,KCNJ3,CNTN5,SCN2A,LRRTM4,RXFP2,LRRC7,GPC5,FLRT2,MMP16,CNTN1,NPNT,TRHDE,CACNA2D1,DPP10,NRCAM,STXBP5,HCN1,KTN1,GRIA3,GRIA4,LRRC4C,NECTIN3,GRM7,ADAM22,PCDH20,ADGRG6,IL1RAPL1,CNTNAP2,KCNIP4,RXFP1,NRG3,IL1RAP,SLC16A7,PCDH7,PCDH9,CDH10,GABRA3,EPHA7
GO: Cellular Component	GO:0043195	terminal bouton		1.208e-05	0.007755	0.0002216	0.001561	11	132	PTPRD,SYT1,AKAP7,STXBP5,PCLO,GRIA3,GRIA4,NECTIN3,GRM7,SLC16A7,EPHA7
GO: Cellular Component	GO:0098688	parallel fiber to Purkinje cell synapse		1.453e-05	0.009326	0.0002591	0.001824	6	33	CNTN6,KCNJ3,PCLO,GRIA3,CADPS2,SLC16A7
GO: Cellular Component	GO:0044306	neuron projection terminus		1.608e-05	0.01032	0.0002764	0.001947	15	247	CHRM3,PGR,PTPRD,SYT1,DMD,AKAP7,STXBP5,HCN1,PCLO,GRIA3,GRIA4,NECTIN3,GRM7,SLC16A7,EPHA7
GO: Cellular Component	GO:0098686	hippocampal mossy fiber to CA3 synapse		1.679e-05	0.01078	0.0002764	0.001947	7	50	PTPRD,SYT1,AKAP7,STXBP5,NECTIN3,SLC16A7,EPHA7
GO: Cellular Component	GO:0097464	thorny excrescence		1.679e-05	0.01078	0.0002764	0.001947	7	50	PTPRD,SYT1,AKAP7,STXBP5,NECTIN3,SLC16A7,EPHA7
GO: Cellular Component	GO:0034702	ion channel complex		1.896e-05	0.01217	0.0003043	0.002143	17	313	GABRB1,GABRB2,KCNJ3,SCN2A,LRRTM4,LRRC7,AKAP6,CACNA2D1,DPP10,STXBP5,HCN1,GRIA3,GRIA4,CNTNAP2,KCNIP4,UNC80,GABRA3
GO: Cellular Component	GO:1990026	hippocampal mossy fiber expansion		2.187e-05	0.01404	0.0003424	0.002411	7	52	PTPRD,SYT1,AKAP7,STXBP5,NECTIN3,SLC16A7,EPHA7
GO: Cellular Component	GO:0030426	growth cone		2.469e-05	0.01585	0.0003612	0.002544	14	226	ADCY10,MYO5A,MAP2,MYO9A,ITGA4,CDKL5,NRXN1,KIF5C,PCLO,UNC5C,CPEB4,DOCK7,ELAVL4,PCDH9
GO: Cellular Component	GO:0043679	axon terminus		2.469e-05	0.01585	0.0003612	0.002544	14	226	CHRM3,PGR,PTPRD,SYT1,AKAP7,STXBP5,HCN1,PCLO,GRIA3,GRIA4,NECTIN3,GRM7,SLC16A7,EPHA7
GO: Cellular Component	GO:0005887	integral component of plasma membrane		2.475e-05	0.01589	0.0003612	0.002544	51	1710	GABRB1,GABRB2,ERBB4,KCNH7,OPN3,ADGRB3,CD46,ATP8B1,ITGA4,CHRM3,ADGRL4,BMPR2,PTPRD,NRXN1,SLC24A2,LRFN5,KCNJ3,SCN2A,LRRTM4,RXFP2,LRRC7,GPC5,FLRT2,MMP16,NPNT,TRHDE,DPP10,NRCAM,STXBP5,HCN1,KTN1,GRIA3,GRIA4,LRRC4C,NECTIN3,GRM7,ADAM22,PCDH20,ADGRG6,IL1RAPL1,CNTNAP2,KCNIP4,RXFP1,NRG3,IL1RAP,SLC16A7,PCDH7,PCDH9,CDH10,GABRA3,EPHA7
GO: Cellular Component	GO:0097457	hippocampal mossy fiber		2.814e-05	0.01807	0.0004015	0.002828	7	54	PTPRD,SYT1,AKAP7,STXBP5,NECTIN3,SLC16A7,EPHA7
GO: Cellular Component	GO:0030427	site of polarized growth		3.144e-05	0.02018	0.0004311	0.003036	14	231	ADCY10,MYO5A,MAP2,MYO9A,ITGA4,CDKL5,NRXN1,KIF5C,PCLO,UNC5C,CPEB4,DOCK7,ELAVL4,PCDH9
GO: Cellular Component	GO:0044302	dentate gyrus mossy fiber		3.18e-05	0.02041	0.0004311	0.003036	7	55	PTPRD,SYT1,AKAP7,STXBP5,NECTIN3,SLC16A7,EPHA7
GO: Cellular Component	GO:0099026	anchored component of presynaptic membrane		3.223e-05	0.02069	0.0004311	0.003036	4	12	CNTN6,CNTN5,CNTN1,CACNA2D1
GO: Cellular Component	GO:1902495	transmembrane transporter complex		4.815e-05	0.03091	0.0006308	0.004443	17	337	GABRB1,GABRB2,KCNJ3,SCN2A,LRRTM4,LRRC7,AKAP6,CACNA2D1,DPP10,STXBP5,HCN1,GRIA3,GRIA4,CNTNAP2,KCNIP4,UNC80,GABRA3
GO: Cellular Component	GO:1990351	transporter complex		6.434e-05	0.04131	0.0008261	0.005818	17	345	GABRB1,GABRB2,KCNJ3,SCN2A,LRRTM4,LRRC7,AKAP6,CACNA2D1,DPP10,STXBP5,HCN1,GRIA3,GRIA4,CNTNAP2,KCNIP4,UNC80,GABRA3
GO: Cellular Component	GO:0048788	cytoskeleton of presynaptic active zone		8.535e-05	0.0548	0.001074	0.007567	3	6	PCLO,RIMS1,RIMS2
GO: Cellular Component	GO:0016342	catenin complex		0.0001009	0.06479	0.001246	0.008775	5	29	CDH6,CDH10,CDH11,CDH12,CDH18
GO: Cellular Component	GO:0098797	plasma membrane protein complex		0.0001354	0.08693	0.00164	0.01155	26	711	TBC1D5,ITGA4,SGCZ,KCNJ3,SCN2A,LRRTM4,LRRC7,DMD,NPNT,CACNA2D1,DPP10,DTNA,STXBP5,HCN1,GRIA3,GRIA4,FCHO2,FAF1,CNTNAP2,SNTG1,KCNIP4,CDH6,CDH10,CDH11,CDH12,CDH18
GO: Cellular Component	GO:0099056	integral component of presynaptic membrane		0.0001485	0.09534	0.001766	0.01243	9	118	ERBB4,CHRM3,PTPRD,NRXN1,KCNJ3,SCN2A,GRIA3,GRM7,CDH10
GO: Cellular Component	GO:0099144	anchored component of synaptic membrane		0.0001842	0.1183	0.002151	0.01515	4	18	CNTN6,CNTN5,CNTN1,CACNA2D1
GO: Cellular Component	GO:0048786	presynaptic active zone		0.0001878	0.1205	0.002152	0.01516	8	96	NRXN1,SYN1,CACNA2D1,PCLO,GRM7,RIMS1,RIMS2,CDH10
GO: Cellular Component	GO:0044309	neuron spine		0.0002653	0.1703	0.002988	0.02104	13	249	PGR,PTPRD,SYT1,LRRC7,EEA1,AKAP7,STXBP5,GRIA3,GRIA4,NECTIN3,CPEB4,SLC16A7,EPHA7
GO: Cellular Component	GO:0005913	cell-cell adherens junction		0.0002744	0.1761	0.003035	0.02137	9	128	BMPR2,LRRC7,NECTIN3,CTNNA3,CDH6,CDH10,CDH11,CDH12,CDH18
GO: Cellular Component	GO:0090665	glycoprotein complex		0.0002842	0.1825	0.003035	0.02137	4	20	SGCZ,DMD,DTNA,SNTG1
GO: Cellular Component	GO:0016010	dystrophin-associated glycoprotein complex		0.0002842	0.1825	0.003035	0.02137	4	20	SGCZ,DMD,DTNA,SNTG1
GO: Cellular Component	GO:0005814	centriole		0.0002883	0.1851	0.003035	0.02137	22	583	RAPGEF6,CEP85L,PPP1R12A,RABGAP1,CNTLN,BICD1,CDKL5,BRCA2,BOD1L1,SCLT1,OFD1,IFT81,CEP290,KIF3A,AGBL4,ORC2,CCDC88A,CEP83,CEP70,ERCC6L2,ROCK1,PKN2
GO: Cellular Component	GO:0005911	cell-cell junction		0.0003003	0.1928	0.003109	0.0219	20	506	ITGA4,MAGI2,BMPR2,NRXN1,SCN2A,LRRC7,FLRT2,AKAP6,CDC42BPA,NECTIN3,CASK,CNTNAP2,CTNNA3,PKN2,CDH6,PCDH9,CDH10,CDH11,CDH12,CDH18
GO: Cellular Component	GO:0019897	extrinsic component of plasma membrane		0.0003118	0.2001	0.003177	0.02237	11	189	SYTL2,MAGI2,EEA1,DTNA,STXBP5,CNKSR2,CDH6,CDH10,CDH11,CDH12,CDH18
GO: Cellular Component	GO:0060076	excitatory synapse		0.0003242	0.2081	0.003252	0.0229	7	79	CNTN6,KCNJ3,SYT1,PCLO,GRIA3,CADPS2,SLC16A7
GO: Cellular Component	GO:0005815	microtubule organizing center		0.0003509	0.2252	0.003465	0.02441	26	756	SPATA7,RAPGEF6,CEP85L,PPP1R12A,RABGAP1,CNTLN,KMT2E,BIRC6,BICD1,CDKL5,BRCA2,BOD1L1,SCLT1,DCDC2,OFD1,IFT81,CEP290,KIF3A,AGBL4,ORC2,CCDC88A,CEP83,CEP70,ERCC6L2,ROCK1,PKN2
GO: Cellular Component	GO:0099569	presynaptic cytoskeleton		0.0004876	0.313	0.004722	0.03325	3	10	PCLO,RIMS1,RIMS2
GO: Cellular Component	GO:0034703	cation channel complex		0.0004927	0.3163	0.004722	0.03325	12	232	KCNJ3,SCN2A,LRRTM4,AKAP6,CACNA2D1,DPP10,HCN1,GRIA3,GRIA4,CNTNAP2,KCNIP4,UNC80
GO: Cellular Component	GO:0015630	microtubule cytoskeleton		0.0005909	0.3794	0.005579	0.03929	39	1368	ADCY10,SPATA7,MAP9,RAPGEF6,MYO5A,MAP2,MYCBP2,CEP85L,PPP1R12A,RABGAP1,CNTLN,KMT2E,BIRC6,DNAH14,BICD1,CDKL5,BRCA2,FMN1,NAV3,BOD1L1,KIF5C,SCLT1,DCDC2,OFD1,IFT81,CEP290,CCDC39,KIF3A,AGBL4,ORC2,NCOR1,CCDC88A,SMC3,STAU2,CEP83,CEP70,ERCC6L2,ROCK1,PKN2
GO: Cellular Component	GO:0043197	dendritic spine		0.0007689	0.4937	0.007154	0.05039	12	244	PGR,PTPRD,SYT1,LRRC7,AKAP7,STXBP5,GRIA3,GRIA4,NECTIN3,CPEB4,SLC16A7,EPHA7
GO: Cellular Component	GO:0060077	inhibitory synapse		0.0009401	0.6036	0.008622	0.06072	4	27	NRXN1,PCLO,RIMS1,RIMS2
GO: Cellular Component	GO:0098796	membrane protein complex		0.001173	0.7529	0.0106	0.07468	37	1324	GABRB1,GABRB2,TBC1D5,ITGA4,SGCZ,KCNJ3,SCN2A,LRRTM4,SYT1,LRRC7,DMD,SCLT1,STX17,NPNT,AKAP6,CACNA2D1,DPP10,STXBP5L,DTNA,STXBP5,HCN1,GRIA3,GRIA4,COPG2,FCHO2,FAF1,CNTNAP2,SNTG1,KCNIP4,DMAC2L,CDH6,CDH10,CDH11,CDH12,UNC80,CDH18,GABRA3
GO: Cellular Component	GO:0005813	centrosome		0.001407	0.9033	0.01242	0.08746	19	532	RAPGEF6,CEP85L,PPP1R12A,RABGAP1,CNTLN,BICD1,CDKL5,BRCA2,BOD1L1,SCLT1,OFD1,IFT81,CEP290,KIF3A,ORC2,CCDC88A,CEP70,ERCC6L2,PKN2
GO: Cellular Component	GO:0031045	dense core granule		0.001412	0.9066	0.01242	0.08746	4	30	SYT1,BACE2,STXBP5L,STXBP5
GO: Cellular Component	GO:0016013	syntrophin complex		0.001587	1	0.01377	0.09699	2	4	DMD,SNTG1
GO: Cellular Component	GO:0098945	intrinsic component of presynaptic active zone membrane		0.001806	1	0.01546	0.1089	4	32	NRXN1,CACNA2D1,GRM7,CDH10
GO: Cellular Component	GO:0005912	adherens junction		0.002505	1	0.02116	0.149	19	560	DCAF6,PPP1R12A,CD46,ITGA4,FAP,BMPR2,FMN1,LRRC7,FLRT2,SORBS2,NECTIN3,CASK,CTNNA3,DOCK7,CDH6,CDH10,CDH11,CDH12,CDH18
GO: Cellular Component	GO:0002079	inner acrosomal membrane		0.002617	1	0.02182	0.1537	2	5	CD46,EQTN
GO: Cellular Component	GO:0005794	Golgi apparatus		0.002965	1	0.0244	0.1718	42	1643	PDE3B,ACER3,MYO5A,TBC1D5,CD46,ATP8B1,GCNT4,BIRC6,JAKMIP2,F8,BICD1,ST6GAL2,ATP11B,MBTPS2,CLVS2,RABGAP1L,GOLIM4,SYN1,SYT1,GPC5,BACE2,COG5,MMP16,PARM1,PCLO,COP1,COPG2,MYO1B,NBEA,GRM7,AGBL4,CCDC88A,CDK13,GCC2,SRGN,PRKAA2,CEP83,CNTNAP2,FUT9,ROCK1,FUT8,FBXW7
GO: Cellular Component	GO:0044304	main axon		0.00315	1	0.0256	0.1803	6	87	MAP2,SCN2A,LRRC7,NRCAM,CNTNAP2,ROBO2
GO: Cellular Component	GO:0070161	anchoring junction		0.003344	1	0.02652	0.1867	19	575	DCAF6,PPP1R12A,CD46,ITGA4,FAP,BMPR2,FMN1,LRRC7,FLRT2,SORBS2,NECTIN3,CASK,CTNNA3,DOCK7,CDH6,CDH10,CDH11,CDH12,CDH18
GO: Cellular Component	GO:0031252	cell leading edge		0.003346	1	0.02652	0.1867	16	449	MYO5A,MAP2,CDKL5,FAP,SORBS2,CDC42BPA,HCN1,CCDC88A,UNC5C,CNTNAP2,CTNNA3,SNTG1,ROBO2,ROCK1,PKN2,GABRA3
GO: Cellular Component	GO:0032839	dendrite cytoplasm		0.003431	1	0.02686	0.1892	4	38	MAP2,CDKL5,KIF5C,STAU2
GO: Cellular Component	GO:1902711	GABA-A receptor complex		0.003527	1	0.02696	0.1899	3	19	GABRB1,GABRB2,GABRA3
GO: Cellular Component	GO:0016528	sarcoplasm		0.003528	1	0.02696	0.1899	6	89	MEF2C,AKAP7,AKAP6,CACNA2D1,JPH1,ASPH
GO: Cellular Component	GO:0019898	extrinsic component of membrane		0.003793	1	0.02865	0.2018	13	334	SYTL2,RB1CC1,MAGI2,SYN1,EEA1,DTNA,STXBP5,CNKSR2,CDH6,CDH10,CDH11,CDH12,CDH18
GO: Cellular Component	GO:0031984	organelle subcompartment		0.003892	1	0.02904	0.2045	15	415	BIRC6,BICD1,ST6GAL2,ATP11B,CLVS2,GOLIM4,BACE2,COG5,PCLO,MYO1B,NBEA,GCC2,ASPH,FUT9,FUT8
GO: Cellular Component	GO:0031225	anchored component of membrane		0.003935	1	0.02904	0.2045	9	187	NCAM2,MDGA2,CNTN6,CNTN5,SYN1,GPC5,CNTN1,CNTN4,CACNA2D1
GO: Cellular Component	GO:0043083	synaptic cleft		0.004725	1	0.03371	0.2374	3	21	ADGRB3,GRIA3,LGI1
GO: Cellular Component	GO:1902710	GABA receptor complex		0.004725	1	0.03371	0.2374	3	21	GABRB1,GABRB2,GABRA3
GO: Cellular Component	GO:0098831	presynaptic active zone cytoplasmic component		0.004725	1	0.03371	0.2374	3	21	PCLO,RIMS1,RIMS2
GO: Cellular Component	GO:0046658	anchored component of plasma membrane		0.005254	1	0.03667	0.2582	5	68	CNTN6,CNTN5,GPC5,CNTN1,CACNA2D1
GO: Cellular Component	GO:0043198	dendritic shaft		0.005254	1	0.03667	0.2582	5	68	MAP2,HCN1,GRIA3,GRM7,STAU2
GO: Cellular Component	GO:0043194	axon initial segment		0.005405	1	0.03731	0.2628	3	22	MAP2,LRRC7,NRCAM
GO: Cellular Component	GO:0098791	Golgi subcompartment		0.00564	1	0.03852	0.2713	14	391	BIRC6,BICD1,ST6GAL2,ATP11B,CLVS2,GOLIM4,BACE2,COG5,PCLO,MYO1B,NBEA,GCC2,FUT9,FUT8
GO: Cellular Component	GO:0034705	potassium channel complex		0.005937	1	0.03973	0.2798	6	99	KCNJ3,DPP10,HCN1,GRIA4,CNTNAP2,KCNIP4
GO: Cellular Component	GO:0045178	basal part of cell		0.005941	1	0.03973	0.2798	5	70	ADCY10,ERBB4,FAP,BMPR2,DOCK7
GO: Cellular Component	GO:0098681	synaptic ribbon		0.006141	1	0.03982	0.2805	3	23	PCLO,KIF3A,RIMS2
GO: Cellular Component	GO:0099243	extrinsic component of synaptic membrane		0.006141	1	0.03982	0.2805	3	23	MAGI2,STXBP5,CNKSR2
GO: Cellular Component	GO:0097470	ribbon synapse		0.006141	1	0.03982	0.2805	3	23	PCLO,KIF3A,RIMS2
GO: Cellular Component	GO:0030315	T-tubule		0.006306	1	0.03984	0.2806	5	71	KCNJ3,SCN2A,AKAP7,AKAP6,CACNA2D1
GO: Cellular Component	GO:0099086	synaptonemal structure		0.006329	1	0.03984	0.2806	4	45	BRCA2,SYN1,C14orf39,SMC3
GO: Cellular Component	GO:0000795	synaptonemal complex		0.006329	1	0.03984	0.2806	4	45	BRCA2,SYN1,C14orf39,SMC3
GO: Cellular Component	GO:1990316	Atg1/ULK1 kinase complex		0.007091	1	0.0442	0.3113	2	8	TBC1D5,RB1CC1
GO: Cellular Component	GO:0030133	transport vesicle		0.007279	1	0.04493	0.3164	15	445	PCSK2,MYO5A,SYTL2,GOLIM4,SYN1,SYT1,STX17,AKAP7,STXBP5,PCLO,COPG2,ARFGEF3,CCDC88A,OVGP1,CADPS2
GO: Cellular Component	GO:0048787	presynaptic active zone membrane		0.007385	1	0.04516	0.318	4	47	NRXN1,CACNA2D1,GRM7,CDH10
Pathway	1270234	Adherens junctions interactions	BioSystems: REACTOME	8.965e-07	0.001108	0.001108	0.008529	7	31	CADM2,NECTIN3,CDH6,CDH10,CDH11,CDH12,CDH18
Pathway	1270231	Cell-Cell communication	BioSystems: REACTOME	2.503e-05	0.03094	0.01547	0.1191	11	134	CADM2,MAGI2,SKAP2,NECTIN3,CASK,FYB1,CDH6,CDH10,CDH11,CDH12,CDH18
Pathway	1268763	Neuronal System	BioSystems: REACTOME	5.127e-05	0.06337	0.02112	0.1626	18	351	GABRB1,GABRB2,KCNH7,RPS6KA3,PTPRD,NRXN1,KCNJ3,LRRTM4,SYN1,SYT1,CACNA2D1,CAMK4,HCN1,GRIA3,GRIA4,CASK,RIMS1,GABRA3
Pathway	1270233	Cell-cell junction organization	BioSystems: REACTOME	0.0001054	0.1302	0.03256	0.2506	7	62	CADM2,NECTIN3,CDH6,CDH10,CDH11,CDH12,CDH18
Pathway	1268766	Transmission across Chemical Synapses	BioSystems: REACTOME	0.0001328	0.1641	0.03283	0.2527	13	218	GABRB1,GABRB2,RPS6KA3,KCNJ3,SYN1,SYT1,CACNA2D1,CAMK4,GRIA3,GRIA4,CASK,RIMS1,GABRA3
Pathway	M295	Genes related to PIP3 signaling in cardiac myocytes	MSigDB C2 BIOCARTA (v6.0)	0.0001729	0.2137	0.03562	0.2742	7	67	ERBB4,RPS6KA3,RPS6KB1,AKT3,PAK5,PAK3,SOS1

## Sheet: Module 05
Category	ID	Name	Source	p-value	q-value Bonferroni	q-value FDR B&H	q-value FDR B&Y	Hit Count in Query List	Hit Count in Genome	Hit in Query List
GO: Biological Process	GO:0007049	cell cycle		7.38e-11	3.769e-07	3.769e-07	3.436e-06	81	1971	CDK17,GTPBP4,HGF,CENPW,CETN3,USP9X,SMC1A,ESCO1,WAC,PNPT1,SYCP2,EID1,AHR,TAOK1,NIPBL,HSP90AA1,ROCK2,CUL3,SLF1,NEK7,YTHDC2,SMC2,FANCM,CLOCK,ATF2,PRPF40A,CNOT6L,INTS13,SSX2IP,MPLKIP,SENP6,APPL1,CEP295,MAPK8,STAG2,MYBL1,HAUS6,WAPL,ATR,LIN54,CKAP5,PSMC6,DAZL,PTEN,SEPTIN6,DDX3X,TTC19,EVI5,PSME4,ALMS1,NAE1,DLG1,GNAI1,CDC73,MGA,PHIP,NPAT,CASP8AP2,WASL,RASA1,RBBP8,SMC4,DYNLT3,MZT1,NR3C1,TERF1,CCNC,CCNG1,C…
GO: Biological Process	GO:0051301	cell division		1.224e-08	6.253e-05	1.53e-05	0.0001395	39	725	CENPW,CETN3,USP9X,SMC1A,SYCP2,FGF9,ROCK2,CUL3,SMC2,PRPF40A,INTS13,MPLKIP,MAPK8,EIF2AK2,STAG2,HAUS6,WAPL,CKAP5,SEPTIN6,TTC19,PTN,EVI5,GNAI1,TAF4B,WASL,RASA1,RBBP8,SMC4,DYNLT3,NR3C1,THOC2,TERF1,CCNG1,USP8,SH3GLB1,ARL8B,CD34,MASTL,HELLS
GO: Biological Process	GO:0140014	mitotic nuclear division		1.498e-08	7.652e-05	1.53e-05	0.0001395	50	1083	HGF,CENPW,SMC1A,PNPT1,SYCP2,TAOK1,NIPBL,HSP90AA1,ROCK2,CUL3,SLF1,NEK7,YTHDC2,SMC2,ATF2,CNOT6L,INTS13,STAG2,MYBL1,HAUS6,WAPL,CKAP5,PSMC6,PTEN,SEPTIN6,DDX3X,TTC19,PSME4,ALMS1,NAE1,DLG1,GNAI1,CDC73,PHIP,NPAT,RASA1,RBBP8,SMC4,DYNLT3,MZT1,TERF1,CCNG1,CCNH,ORC4,USP8,OPTN,MASTL,CDC27,TOP2B,PCM1
GO: Biological Process	GO:0000278	mitotic cell cycle		1.498e-08	7.652e-05	1.53e-05	0.0001395	50	1083	HGF,CENPW,SMC1A,PNPT1,SYCP2,TAOK1,NIPBL,HSP90AA1,ROCK2,CUL3,SLF1,NEK7,YTHDC2,SMC2,ATF2,CNOT6L,INTS13,STAG2,MYBL1,HAUS6,WAPL,CKAP5,PSMC6,PTEN,SEPTIN6,DDX3X,TTC19,PSME4,ALMS1,NAE1,DLG1,GNAI1,CDC73,PHIP,NPAT,RASA1,RBBP8,SMC4,DYNLT3,MZT1,TERF1,CCNG1,CCNH,ORC4,USP8,OPTN,MASTL,CDC27,TOP2B,PCM1
GO: Biological Process	GO:1903047	mitotic cell cycle process		1.498e-08	7.652e-05	1.53e-05	0.0001395	50	1083	HGF,CENPW,SMC1A,PNPT1,SYCP2,TAOK1,NIPBL,HSP90AA1,ROCK2,CUL3,SLF1,NEK7,YTHDC2,SMC2,ATF2,CNOT6L,INTS13,STAG2,MYBL1,HAUS6,WAPL,CKAP5,PSMC6,PTEN,SEPTIN6,DDX3X,TTC19,PSME4,ALMS1,NAE1,DLG1,GNAI1,CDC73,PHIP,NPAT,RASA1,RBBP8,SMC4,DYNLT3,MZT1,TERF1,CCNG1,CCNH,ORC4,USP8,OPTN,MASTL,CDC27,TOP2B,PCM1
GO: Biological Process	GO:0048285	organelle fission		5.359e-08	0.0002737	4.561e-05	0.0004158	55	1301	SLC25A46,HGF,CENPW,SMC1A,GDAP1,PNPT1,SYCP2,TAOK1,NIPBL,HSP90AA1,ROCK2,CUL3,SLF1,NEK7,YTHDC2,SMC2,FANCM,ATF2,CNOT6L,INTS13,STAG2,MYBL1,HAUS6,WAPL,CKAP5,PSMC6,DAZL,PTEN,SEPTIN6,DDX3X,TTC19,PSME4,ALMS1,NAE1,DLG1,GNAI1,CDC73,PHIP,NPAT,RASA1,RBBP8,SMC4,DNM1L,DYNLT3,MZT1,TERF1,CCNG1,CCNH,ORC4,USP8,OPTN,MASTL,CDC27,TOP2B,PCM1
GO: Biological Process	GO:0000280	nuclear division		2.484e-07	0.001268	0.0001812	0.001652	52	1256	HGF,CENPW,SMC1A,PNPT1,SYCP2,TAOK1,NIPBL,HSP90AA1,ROCK2,CUL3,SLF1,NEK7,YTHDC2,SMC2,FANCM,ATF2,CNOT6L,INTS13,STAG2,MYBL1,HAUS6,WAPL,CKAP5,PSMC6,DAZL,PTEN,SEPTIN6,DDX3X,TTC19,PSME4,ALMS1,NAE1,DLG1,GNAI1,CDC73,PHIP,NPAT,RASA1,RBBP8,SMC4,DYNLT3,MZT1,TERF1,CCNG1,CCNH,ORC4,USP8,OPTN,MASTL,CDC27,TOP2B,PCM1
GO: Biological Process	GO:0022402	cell cycle process		3.169e-07	0.001618	0.0002023	0.001844	62	1632	HGF,CENPW,CETN3,SMC1A,ESCO1,PNPT1,SYCP2,TAOK1,NIPBL,HSP90AA1,ROCK2,CUL3,SLF1,NEK7,YTHDC2,SMC2,FANCM,ATF2,PRPF40A,CNOT6L,INTS13,SSX2IP,SENP6,CEP295,MAPK8,STAG2,MYBL1,HAUS6,WAPL,CKAP5,PSMC6,DAZL,PTEN,SEPTIN6,DDX3X,TTC19,PSME4,ALMS1,NAE1,DLG1,GNAI1,CDC73,MGA,PHIP,NPAT,WASL,RASA1,RBBP8,SMC4,DYNLT3,MZT1,TERF1,CCNG1,CCNH,ORC4,USP8,OPTN,SH3GLB1,MASTL,CDC27,TOP2B,PCM1
GO: Biological Process	GO:0000226	microtubule cytoskeleton organization		6.806e-07	0.003476	0.0003862	0.003521	39	846	CENPW,CETN3,SMC1A,SAXO2,HOOK1,ATP6V1D,TAOK1,HSP90AA1,ROCK2,SPATA6,IFT74,NEK7,GDA,INTS13,IQCB1,SSX2IP,SENP6,CEP295,MAPK8,STAG2,HAUS6,CKAP5,SEPTIN6,HDGFL3,CEP350,EVI5,CCDC66,ALMS1,MAP7D2,DLG1,GNAI1,CAMSAP2,RPGRIP1L,IFT57,MZT1,OCRL,TERF1,ATG3,PCM1
GO: Biological Process	GO:0044087	regulation of cellular component biogenesis		1.292e-06	0.006596	0.0006	0.005469	44	1040	SMC1A,MTPN,SH3YL1,AHR,FNIP1,HSP90AA1,ROCK2,SLF1,FMR1,ARFGEF1,LMO4,GDA,CNOT6L,LRRTM2,VPS41,SENP6,CEP295,MAPK8,MAPK9,EIF2AK2,STAG2,ATR,PSMC6,NCL,PTEN,DDX3X,EVI5,SLITRK2,ALMS1,BRAF,SACS,DLG1,CAMSAP2,GPM6A,GPM6B,WASL,RASA1,SLITRK4,DNM1L,LAMP2,TERF1,GTF2H1,SH3GLB1,ATG3
GO: Biological Process	GO:0033365	protein localization to organelle		1.292e-06	0.0066	0.0006	0.005469	54	1400	RPL21,CENPW,USP9X,GDAP1,PEX7,ADAM10,ATP6V1D,FGF9,NIPBL,HSP90AA1,ROCK2,SLF1,SGTB,SPATA6,IFT74,PEX3,LZTFL1,INTS13,SCG3,IQCB1,SSX2IP,TMEM30A,APPL1,MAPK8,HAUS6,WAPL,ATR,CKAP5,SEPTIN6,DDX3X,EVI5,CCDC66,ALMS1,IMMP1L,DLG1,RAB6A,PHIP,KPNA3,RANBP2,RPGRIP1L,IFT57,RTN4,DNM1L,LAMP2,OCRL,TERF1,NMD3,OPTN,SH3GLB1,ATG3,RABEP1,SEC62,SEC63,PCM1
GO: Biological Process	GO:0051726	regulation of cell cycle		1.449e-06	0.007399	0.0006166	0.005621	51	1295	CDK17,GTPBP4,SMC1A,WAC,PNPT1,TAOK1,NIPBL,HSP90AA1,ROCK2,CUL3,SLF1,NEK7,YTHDC2,CLOCK,ATF2,PRPF40A,CNOT6L,INTS13,SENP6,CEP295,MAPK8,STAG2,HAUS6,WAPL,ATR,LIN54,CKAP5,PSMC6,DAZL,PTEN,DDX3X,PSME4,ALMS1,NAE1,DLG1,GNAI1,CDC73,MGA,PHIP,RBBP8,DYNLT3,TERF1,CCNC,CCNG1,CCNH,GTF2H1,SH3GLB1,MASTL,CDC27,TOP2B,PCM1
GO: Biological Process	GO:0070647	protein modification by small protein conjugation or removal		2.508e-06	0.01281	0.0009853	0.008981	46	1138	CBLL1,TPP2,GTPBP4,USP9X,BTBD1,TTC3,COPS2,WAC,UBE2G1,UBE3A,UCHL5,SHPRH,ANKIB1,USP1,HSP90AA1,CUL3,MARCHF7,FANCM,AR,TRIM33,DZIP3,HLTF,SENP6,UBR3,MAPK8,MAPK9,RNF130,PSMC6,PTEN,RNF115,RTF1,PSME4,NAE1,USP32,CDC73,RANBP2,SPOPL,WWP1,DNM1L,CCNC,USP8,DCUN1D1,ATG3,HECTD2,MASTL,CDC27
GO: Biological Process	GO:0007017	microtubule-based process		2.784e-06	0.01422	0.001015	0.009257	44	1071	CENPW,CETN3,SMC1A,SAXO2,AP3S1,HOOK1,ATP6V1D,TAOK1,HSP90AA1,ROCK2,XRN2,FMR1,SPATA6,IFT74,NEK7,GDA,INTS13,IQCB1,SSX2IP,SENP6,CEP295,MAPK8,STAG2,HAUS6,CKAP5,SEPTIN6,HDGFL3,CEP350,EVI5,CCDC66,ALMS1,MAP7D2,DLG1,GNAI1,CAMSAP2,RAB6A,RPGRIP1L,IFT57,MZT1,OCRL,TERF1,ATG3,ARL8B,PCM1
GO: Biological Process	GO:0032446	protein modification by small protein conjugation		3.103e-06	0.01585	0.001057	0.009632	40	935	CBLL1,TPP2,GTPBP4,USP9X,BTBD1,TTC3,WAC,UBE2G1,UBE3A,SHPRH,ANKIB1,HSP90AA1,CUL3,MARCHF7,FANCM,TRIM33,DZIP3,HLTF,SENP6,UBR3,MAPK8,MAPK9,RNF130,PSMC6,PTEN,RNF115,RTF1,PSME4,NAE1,CDC73,RANBP2,SPOPL,WWP1,DNM1L,CCNC,DCUN1D1,ATG3,HECTD2,MASTL,CDC27
GO: Biological Process	GO:0043254	regulation of protein complex assembly		3.855e-06	0.01969	0.001225	0.01117	26	485	MTPN,AHR,FNIP1,HSP90AA1,SLF1,ARFGEF1,LMO4,GDA,CNOT6L,VPS41,SENP6,MAPK8,MAPK9,EIF2AK2,ATR,PSMC6,DDX3X,DLG1,CAMSAP2,WASL,RASA1,DNM1L,LAMP2,TERF1,GTF2H1,SH3GLB1
GO: Biological Process	GO:0019827	stem cell population maintenance		4.077e-06	0.02082	0.001225	0.01117	15	186	SMC1A,MED14,NIPBL,MAPK8,STAG2,KDM4C,RTF1,PTN,BMPR1A,BRAF,CDC73,TUT4,ZNF322,RIF1,PCM1
GO: Biological Process	GO:0098727	maintenance of cell number		5.293e-06	0.02703	0.001424	0.01298	15	190	SMC1A,MED14,NIPBL,MAPK8,STAG2,KDM4C,RTF1,PTN,BMPR1A,BRAF,CDC73,TUT4,ZNF322,RIF1,PCM1
GO: Biological Process	GO:0016567	protein ubiquitination		5.299e-06	0.02706	0.001424	0.01298	37	852	CBLL1,TPP2,GTPBP4,USP9X,BTBD1,TTC3,WAC,UBE2G1,UBE3A,SHPRH,ANKIB1,HSP90AA1,CUL3,MARCHF7,FANCM,TRIM33,DZIP3,HLTF,UBR3,MAPK8,MAPK9,RNF130,PSMC6,PTEN,RNF115,RTF1,PSME4,CDC73,SPOPL,WWP1,DNM1L,CCNC,DCUN1D1,ATG3,HECTD2,MASTL,CDC27
GO: Biological Process	GO:0048813	dendrite morphogenesis		1.21e-05	0.06179	0.00309	0.02816	14	179	ADAM10,PICALM,SEMA3A,UBE3A,ROCK2,FMR1,PREX2,CAPRIN2,MAPK8,PTEN,PTN,WASL,DNM1L,SH3GLB1
GO: Biological Process	GO:0007059	chromosome segregation		1.477e-05	0.07546	0.003593	0.03275	20	342	CENPW,USP9X,SMC1A,ESCO1,SYCP2,NIPBL,CUL3,SLF1,SMC2,FANCM,STAG2,WAPL,DDX3X,SMC6,SMC4,NR3C1,TERF1,ARL8B,CDC27,TOP2B
GO: Biological Process	GO:0030030	cell projection organization		2.496e-05	0.1275	0.005724	0.05218	61	1828	HGF,USP9X,ADAM10,PICALM,SH3YL1,SEMA3A,ACSL4,SERPINI1,UBE3A,ATP6V1D,TAOK1,ABCD2,HSP90AA1,ROCK2,CUL3,FMR1,SPATA6,IFT74,ARFGEF1,PREX2,PPP3CB,IQCB1,ITSN2,SSX2IP,CAPRIN2,TMEM30A,PRKCI,MAPK8,MAPK9,SNX2,HAUS6,CKAP5,PTEN,SEPTIN6,HDGFL3,PTN,EVI5,SLITRK2,CCDC66,ALMS1,BRAF,FGD4,MTMR2,CAMSAP2,GPM6A,GPM6B,WASL,RPGRIP1L,IFT57,RTN4,SLITRK4,NR4A2,CASP1,DNM1L,OCRL,NR3C1,THOC2,SH3GLB1,ATG3,TOP2B,PCM1
GO: Biological Process	GO:0120036	plasma membrane bounded cell projection organization		2.578e-05	0.1317	0.005724	0.05218	60	1790	HGF,USP9X,ADAM10,PICALM,SH3YL1,SEMA3A,ACSL4,SERPINI1,UBE3A,ATP6V1D,TAOK1,ABCD2,HSP90AA1,ROCK2,FMR1,SPATA6,IFT74,ARFGEF1,PREX2,PPP3CB,IQCB1,ITSN2,SSX2IP,CAPRIN2,TMEM30A,PRKCI,MAPK8,MAPK9,SNX2,HAUS6,CKAP5,PTEN,SEPTIN6,HDGFL3,PTN,EVI5,SLITRK2,CCDC66,ALMS1,BRAF,FGD4,MTMR2,CAMSAP2,GPM6A,GPM6B,WASL,RPGRIP1L,IFT57,RTN4,SLITRK4,NR4A2,CASP1,DNM1L,OCRL,NR3C1,THOC2,SH3GLB1,ATG3,TOP2B,PCM1
GO: Biological Process	GO:0007346	regulation of mitotic cell cycle		3.084e-05	0.1575	0.006563	0.05983	31	713	SMC1A,PNPT1,TAOK1,NIPBL,HSP90AA1,CUL3,SLF1,NEK7,YTHDC2,ATF2,CNOT6L,INTS13,STAG2,HAUS6,CKAP5,PSMC6,PTEN,DDX3X,PSME4,ALMS1,NAE1,DLG1,GNAI1,CDC73,PHIP,DYNLT3,TERF1,CCNG1,CDC27,TOP2B,PCM1
GO: Biological Process	GO:0006397	mRNA processing		4.255e-05	0.2173	0.008692	0.07924	26	557	ZC3H14,SRSF12,PNPT1,CDC40,RBM27,XRN2,FMR1,DNAJC8,RNPC3,CWC22,PRPF40A,PAPOLG,CNOT6L,SNRPB2,SNRPD1,TGS1,CWF19L2,TDRD3,CDC73,RBM11,PTBP2,PRPF38B,THOC2,CCNH,GTF2H1,SLTM
GO: Biological Process	GO:0016358	dendrite development		7.384e-05	0.3771	0.01406	0.1282	17	294	ADAM10,PICALM,SEMA3A,ACSL4,UBE3A,ROCK2,FMR1,PREX2,CAPRIN2,MAPK8,PTEN,PTN,CAMSAP2,WASL,DNM1L,NR3C1,SH3GLB1
GO: Biological Process	GO:0031503	protein-containing complex localization		7.434e-05	0.3797	0.01406	0.1282	29	678	ADAM10,CDC40,ATP6V1D,MIOS,HSP90AA1,SPATA6,IFT74,IQCB1,SSX2IP,HAUS6,ATR,CKAP5,SEPTIN6,EVI5,CCDC66,ALMS1,DLG1,RANBP2,WASL,RPGRIP1L,IFT57,MZT1,OCRL,THOC2,TERF1,NMD3,ATG3,ABCE1,PCM1
GO: Biological Process	GO:0022613	ribonucleoprotein complex biogenesis		7.848e-05	0.4008	0.01431	0.1305	24	512	GTPBP4,SRSF12,GNL2,HSP90AA1,XRN2,RPP30,DIS3,ESF1,NSUN3,CNOT6L,EIF3A,SNRPD1,MRPL1,TGS1,ATR,NCL,PTEN,TEX10,DDX3X,CDC73,PTBP2,NMD3,ABCE1,MPHOSPH10
GO: Biological Process	GO:0007010	cytoskeleton organization		8.35e-05	0.4264	0.0147	0.134	55	1663	CENPW,CETN3,SMC1A,SAXO2,BRWD3,MTPN,HOOK1,ATP6V1D,TAOK1,HSP90AA1,ROCK2,CUL3,SPATA6,IFT74,NEK7,ARFGEF1,PRPF40A,GDA,INTS13,IQCB1,SSX2IP,SENP6,PRKCI,CEP295,MAPK8,STAG2,MYH3,HAUS6,CKAP5,ERBIN,SEPTIN6,HDGFL3,CEP350,EVI5,CCDC66,ALMS1,BRAF,FGD4,MAP7D2,DLG1,GNAI1,CAMSAP2,PHIP,KRAS,GPM6B,WASL,RPGRIP1L,RASA1,IFT57,MZT1,OCRL,TERF1,ATG3,PDCD10,PCM1
GO: Biological Process	GO:0048193	Golgi vesicle transport		0.0001156	0.5902	0.0196	0.1787	31	766	ERGIC2,ATP6V1D,HSP90AA1,CUL3,SPATA6,IFT74,BLZF1,IQCB1,SSX2IP,VPS41,PRKCI,SNX2,DOP1A,HAUS6,CKAP5,SEPTIN6,EVI5,CCDC66,ALMS1,ANKRD28,GOLGA5,RAB2A,RAB6A,RPGRIP1L,GOPC,IFT57,OCRL,OPTN,ATG3,RABEP1,PCM1
GO: Biological Process	GO:0010564	regulation of cell cycle process		0.000119	0.6077	0.0196	0.1787	33	839	SMC1A,TAOK1,NIPBL,HSP90AA1,ROCK2,CUL3,SLF1,PRPF40A,CNOT6L,SENP6,CEP295,MAPK8,STAG2,HAUS6,WAPL,CKAP5,PSMC6,DAZL,PTEN,DDX3X,PSME4,ALMS1,NAE1,GNAI1,CDC73,MGA,PHIP,RBBP8,TERF1,CCNG1,SH3GLB1,CDC27,PCM1
GO: Biological Process	GO:0006886	intracellular protein transport		0.000141	0.72	0.0225	0.2051	51	1536	RPL21,ZDHHC2,USP9X,GDAP1,PEX7,CHM,WLS,AP3S1,CDC40,ATP6V1D,FGF9,HSP90AA1,SGTB,SPATA6,IFT74,PEX3,VPS26A,IQCB1,SSX2IP,VPS41,TMEM30A,APPL1,PRKCI,SNX2,HAUS6,CKAP5,ERBIN,SEPTIN6,SNX13,EVI5,CCDC66,ALMS1,IMMP1L,RAB2A,RAB6A,PHIP,KPNA3,RANBP2,RPGRIP1L,IFT57,LAMP2,OCRL,THOC2,NMD3,SH3GLB1,ATG3,ABCE1,SEC62,SEC63,PDCD10,PCM1
GO: Biological Process	GO:0008156	negative regulation of DNA replication		0.0001558	0.7956	0.02411	0.2198	6	42	GTPBP4,SMC1A,STAG2,WAPL,ATR,TERF1
GO: Biological Process	GO:0051130	positive regulation of cellular component organization		0.0001746	0.8914	0.02573	0.2345	46	1351	CBLL1,HGF,PICALM,SERPINI1,AHR,FNIP1,NIPBL,HSP90AA1,ROCK2,CUL3,SLF1,FMR1,NEK7,AR,GDA,CNOT6L,ITSN2,CAPRIN2,LRRTM2,TMEM30A,APPL1,PRKCI,CEP295,MAPK8,MAPK9,ATR,PSMC6,DAZL,RTF1,PTN,SLITRK2,BRAF,DLG1,PHIP,GPM6A,WASL,RTN4,SLITRK4,DNM1L,NR3C1,TERF1,RIF1,GTF2H1,OPTN,SH3GLB1,LNPK
GO: Biological Process	GO:0033043	regulation of organelle organization		0.0001763	0.9005	0.02573	0.2345	47	1391	HGF,MPV17L,SMC1A,MTPN,EID1,FNIP1,TAOK1,NIPBL,ROCK2,CUL3,SLF1,FMR1,NEK7,ARFGEF1,GDA,CNOT6L,LRRTM2,VPS41,SENP6,CEP295,MAPK8,MAPK9,STAG2,WAPL,ATR,KDM4C,DAZL,HDGFL3,RTF1,EVI5,ALMS1,BRAF,DLG1,GNAI1,CAMSAP2,PHIP,GPM6B,WASL,RASA1,DNM1L,TERF1,RIF1,OPTN,SH3GLB1,ATG3,LNPK,CDC27
GO: Biological Process	GO:0070507	regulation of microtubule cytoskeleton organization		0.0001906	0.9733	0.02704	0.2465	13	203	SMC1A,TAOK1,ROCK2,GDA,SENP6,CEP295,MAPK8,STAG2,HDGFL3,ALMS1,GNAI1,CAMSAP2,TERF1
GO: Biological Process	GO:0016071	mRNA metabolic process		0.0002048	1	0.02827	0.2577	34	901	RPL21,CBLL1,ZC3H14,SRSF12,PNPT1,CDC40,RBM27,ROCK2,XRN2,FMR1,DNAJC8,RNPC3,CWC22,PRPF40A,DIS3,PAPOLG,CNOT6L,SNRPB2,SNRPD1,TGS1,CWF19L2,PSMC6,DAZL,TDRD3,PSME4,CDC73,RBM11,TUT4,PTBP2,PRPF38B,THOC2,CCNH,GTF2H1,SLTM
GO: Biological Process	GO:0051276	chromosome organization		0.0002227	1	0.02993	0.2728	44	1287	CENPW,SMC1A,COPS2,ESCO1,WAC,SYCP2,EID1,SHPRH,KDM6A,NIPBL,HSP90AA1,CUL3,SLF1,FMR1,NEK7,SMC2,CLOCK,ATF2,HLTF,SENP6,MAPK8,STAG2,KANSL1L,WAPL,ATR,JADE3,KDM4C,DDX3X,RTF1,TDRD3,PSME4,CDC73,ASCC3,SMC6,SMC4,NR3C1,TERF1,RLF,RIF1,GTF2H1,CDC27,PHF10,TOP2B,HELLS
GO: Biological Process	GO:0022414	reproductive process		0.000239	1	0.0313	0.2853	53	1651	USP9X,SMC1A,HMGCS1,ACVR2A,ADAM10,SEMA3A,ACSL4,SYCP2,HOOK1,UBE3A,AHR,FGF9,NIPBL,XRN2,SPATA6,YTHDC2,SMC2,FANCM,CLOCK,AR,ZFP37,INTS13,STAG2,MYBL1,WAPL,ZNF148,ATR,DAZL,PTEN,ITGAV,SEPTIN6,DDX3X,PTN,BMPR1A,PSME4,ALMS1,GLRB,DLD,DLG1,TAF4B,HERPUD2,KRAS,TUT4,GOPC,RBBP8,SMC4,NR3C1,TERF1,ZFPM2,RSPO3,CCDC87,MASTL,TOP2B
GO: Biological Process	GO:0000003	reproduction		0.0002499	1	0.0319	0.2908	53	1654	USP9X,SMC1A,HMGCS1,ACVR2A,ADAM10,SEMA3A,ACSL4,SYCP2,HOOK1,UBE3A,AHR,FGF9,NIPBL,XRN2,SPATA6,YTHDC2,SMC2,FANCM,CLOCK,AR,ZFP37,INTS13,STAG2,MYBL1,WAPL,ZNF148,ATR,DAZL,PTEN,ITGAV,SEPTIN6,DDX3X,PTN,BMPR1A,PSME4,ALMS1,GLRB,DLD,DLG1,TAF4B,HERPUD2,KRAS,TUT4,GOPC,RBBP8,SMC4,NR3C1,TERF1,ZFPM2,RSPO3,CCDC87,MASTL,TOP2B
GO: Biological Process	GO:0000902	cell morphogenesis		0.0002597	1	0.03202	0.2919	41	1179	HGF,USP9X,TTC3,ADAM10,PICALM,BRWD3,SEMA3A,UBE3A,AHR,HSP90AA1,ROCK2,CUL3,FMR1,PRPF40A,AR,PREX2,PPP3CB,ITSN2,CAPRIN2,MAPK8,MAPK9,SNX2,ZMYM2,PTEN,ITGAV,PTN,SLITRK2,BRAF,FGD4,DLG1,PHIP,GPM6A,WASL,RASA1,RTN4,SLITRK4,NR4A2,DNM1L,THOC2,SH3GLB1,TOP2B
GO: Biological Process	GO:0032989	cellular component morphogenesis		0.0002633	1	0.03202	0.2919	44	1297	HGF,USP9X,TTC3,ADAM10,PICALM,BRWD3,SEMA3A,PNPT1,UBE3A,AHR,HSP90AA1,ROCK2,CUL3,FMR1,PRPF40A,AR,PREX2,PPP3CB,ITSN2,CAPRIN2,MAPK8,MAPK9,SNX2,MYH3,ZMYM2,PTEN,ITGAV,PTN,SLITRK2,BRAF,FGD4,MTMR2,DLG1,PHIP,GPM6A,WASL,RASA1,RTN4,SLITRK4,NR4A2,DNM1L,THOC2,SH3GLB1,TOP2B
GO: Biological Process	GO:0051254	positive regulation of RNA metabolic process		0.0002919	1	0.03467	0.316	57	1829	HGF,MED14,ACVR2A,PICALM,WAC,PNPT1,UBE3A,AHR,FGF9,NIPBL,ROCK2,STRN3,IFT74,LMO4,CLOCK,FOXJ3,ATF2,AR,CNOT6L,PPP3CB,CAPRIN2,HLTF,MAPK9,NEUROD6,STAG2,MYBL1,ZNF292,ZNF131,SP4,ZNF148,BCLAF1,PSMC6,NCL,DDX3X,RTF1,TDRD3,BMPR1A,TCERG1,CDC73,TAF4B,MGA,PHIP,MED13,NPAT,WASL,ICE2,NR4A2,NR3C1,ZFPM2,CCNC,NMD3,RLF,CCNH,GTF2H1,CARF,PHF10,MTDH
GO: Biological Process	GO:0031334	positive regulation of protein complex assembly		0.0003224	1	0.03742	0.3411	15	272	AHR,FNIP1,HSP90AA1,SLF1,GDA,CNOT6L,MAPK8,MAPK9,ATR,PSMC6,DLG1,WASL,TERF1,GTF2H1,SH3GLB1
GO: Biological Process	GO:0006259	DNA metabolic process		0.0003501	1	0.03938	0.359	38	1080	GTPBP4,HGF,USP9X,SMC1A,COPS2,ESCO1,UCHL5,SHPRH,AHR,TAOK1,POLK,USP1,NIPBL,HSP90AA1,XRN2,SLF1,NEK7,SMC2,FANCM,MAPK8,STAG2,WAPL,ATR,GIN1,PSME4,ASCC3,RBBP8,SMC6,SMC4,TERF1,TFRC,RLF,CCNH,ORC4,RIF1,GTF2H1,TOP2B,HELLS
GO: Biological Process	GO:0070572	positive regulation of neuron projection regeneration		0.0003547	1	0.03938	0.359	4	18	HGF,PTN,BRAF,RTN4
GO: Biological Process	GO:0007147	female meiosis II		0.0003893	1	0.04142	0.3775	2	2	DAZL,MASTL
GO: Biological Process	GO:0090149	mitochondrial membrane fission		0.0003893	1	0.04142	0.3775	2	2	SLC25A46,DNM1L
GO: Biological Process	GO:0006367	transcription initiation from RNA polymerase II promoter		0.0004159	1	0.04335	0.3951	12	192	MED14,AHR,AR,PSMC6,PTEN,TAF4B,MED13,NR4A2,NR3C1,CCNC,CCNH,GTF2H1
GO: Biological Process	GO:0030705	cytoskeleton-dependent intracellular transport		0.0004467	1	0.04457	0.4062	23	541	AP3S1,HOOK1,ATP6V1D,HSP90AA1,FMR1,SPATA6,IFT74,IQCB1,SSX2IP,HAUS6,CKAP5,SEPTIN6,EVI5,CCDC66,ALMS1,RAB6A,WASL,RPGRIP1L,IFT57,OCRL,ATG3,ARL8B,PCM1
GO: Biological Process	GO:0031396	regulation of protein ubiquitination		0.0004528	1	0.04457	0.4062	13	222	GTPBP4,UBE3A,HSP90AA1,CUL3,MARCHF7,FANCM,MAPK8,MAPK9,PTEN,SPOPL,DNM1L,DCUN1D1,MASTL
GO: Biological Process	GO:1902680	positive regulation of RNA biosynthetic process		0.0004538	1	0.04457	0.4062	54	1737	HGF,MED14,ACVR2A,PICALM,WAC,UBE3A,AHR,FGF9,NIPBL,STRN3,IFT74,LMO4,CLOCK,FOXJ3,ATF2,AR,PPP3CB,CAPRIN2,HLTF,MAPK9,NEUROD6,STAG2,MYBL1,ZNF292,ZNF131,SP4,ZNF148,BCLAF1,PSMC6,NCL,DDX3X,RTF1,TDRD3,BMPR1A,TCERG1,CDC73,TAF4B,MGA,PHIP,MED13,NPAT,WASL,ICE2,NR4A2,NR3C1,ZFPM2,CCNC,NMD3,RLF,CCNH,GTF2H1,CARF,PHF10,MTDH
GO: Biological Process	GO:0051640	organelle localization		0.0004767	1	0.04593	0.4187	34	944	PICALM,AP3S1,ATP6V1D,HSP90AA1,CUL3,SPATA6,IFT74,INTS13,IQCB1,SSX2IP,HAUS6,CKAP5,PTEN,SEPTIN6,CD84,EVI5,CCDC66,ALMS1,ANKRD28,DLG1,RAB6A,RANBP2,WASL,RPGRIP1L,IFT57,DNM1L,OCRL,TERF1,NMD3,ATG3,ARL8B,ABCE1,PDCD10,PCM1
GO: Biological Process	GO:0072657	protein localization to membrane		0.0004892	1	0.04626	0.4217	27	686	RPL21,ZDHHC2,CHM,ADAM10,PICALM,HSP90AA1,ROCK2,SGTB,PEX3,LZTFL1,BLZF1,AR,APPL1,PRKCI,MAPK8,TM9SF3,PTN,BRAF,GLRB,DLG1,GOPC,OPTN,SH3GLB1,ATG3,RABEP1,SEC62,SEC63
GO: Cellular Component	GO:0016604	nuclear body		1.22e-08	9.281e-06	9.281e-06	6.694e-05	41	799	CBLL1,TPP2,ZC3H14,WAC,SRSF12,CDC40,RBM27,POLK,FMR1,FAM76B,CWC22,PRPF40A,AR,PAPOLG,SNRPB2,TGS1,HAUS6,ATR,BCLAF1,ZMYM2,PTEN,ERBIN,DDX3X,IMPAD1,PSME4,ZNF638,ASCC3,NPAT,CASP8AP2,RBM11,ICE2,SMC6,NR4A2,SMC4,NR3C1,THOC2,TERF1,PPP4R3B,RIF1,SLTM,MTDH
GO: Cellular Component	GO:0015630	microtubule cytoskeleton		6.869e-08	5.227e-05	2.613e-05	0.0001885	56	1368	CETN3,SMC1A,SAXO2,OLA1,HOOK1,ATP6V1D,TAOK1,HSP90AA1,WDR44,ROCK2,CUL3,SLF1,FMR1,SPATA6,IFT74,NEK7,IQCB1,ITSN2,SSX2IP,CAPRIN2,VPS41,MPLKIP,PRKCI,CEP295,EIF3A,LRIF1,STAG2,HAUS6,CKAP5,CCDC50,SEPTIN6,TTC19,CEP350,CEP170,EVI5,CCDC66,ALMS1,MAP7D2,DLG1,GNAI1,CAMSAP2,RPGRIP1L,IFT57,DNM1L,ZNF322,DYNLT3,MZT1,NR3C1,TERF1,TTLL7,PPP4R3B,RIF1,ARL8B,MASTL,CDC27,PCM1
GO: Cellular Component	GO:0005813	centrosome		1.672e-07	0.0001273	4.242e-05	0.000306	30	532	CETN3,OLA1,HOOK1,ATP6V1D,ROCK2,SLF1,IFT74,IQCB1,ITSN2,SSX2IP,CAPRIN2,MPLKIP,CEP295,HAUS6,CKAP5,TTC19,CEP350,CEP170,CCDC66,ALMS1,GNAI1,CAMSAP2,RPGRIP1L,IFT57,ZNF322,MZT1,PPP4R3B,MASTL,CDC27,PCM1
GO: Cellular Component	GO:0016607	nuclear speck		3.67e-07	0.0002793	5.7e-05	0.0004111	25	406	CBLL1,ZC3H14,WAC,SRSF12,CDC40,RBM27,FAM76B,CWC22,PRPF40A,AR,SNRPB2,HAUS6,BCLAF1,ERBIN,DDX3X,PSME4,ZNF638,ASCC3,RBM11,SMC6,NR4A2,SMC4,NR3C1,THOC2,PPP4R3B
GO: Cellular Component	GO:0005814	centriole		3.745e-07	0.000285	5.7e-05	0.0004111	31	583	CETN3,SAXO2,OLA1,HOOK1,ATP6V1D,ROCK2,SLF1,IFT74,IQCB1,ITSN2,SSX2IP,CAPRIN2,MPLKIP,CEP295,HAUS6,CKAP5,TTC19,CEP350,CEP170,CCDC66,ALMS1,GNAI1,CAMSAP2,RPGRIP1L,IFT57,ZNF322,MZT1,PPP4R3B,MASTL,CDC27,PCM1
GO: Cellular Component	GO:0098805	whole membrane		1.116e-06	0.000849	0.0001415	0.001021	63	1760	SLC25A46,ZDHHC2,MPV17L,TRPC1,GDAP1,PEX7,WLS,ADAM10,PICALM,ACSL4,ZFYVE9,ATP6V1D,MIOS,FAR1,TMX3,ABCD2,WDR44,PEX3,ACBD5,VPS26A,ATF2,MTX2,SCG3,VPS41,TMEM30A,APPL1,PNPLA8,ATP2B1,LMBRD1,SNX2,TAB2,ITGAV,DDX3X,SNX13,BMPR1A,GK,NAE1,MTMR2,DLG1,ATP11C,GNAI1,GOLGA5,RAB2A,RAB6A,KRAS,GPM6B,RANBP2,DMXL2,WASL,VMA21,GOPC,DNM1L,GRIA2,LAMP2,OCRL,TFRC,MAL2,USP8,OPTN,SLC44A1,SH3GLB1,ARL8B,RABEP1
GO: Cellular Component	GO:0005815	microtubule organizing center		1.659e-06	0.001263	0.0001804	0.001301	35	756	CETN3,SAXO2,OLA1,HOOK1,ATP6V1D,ROCK2,SLF1,IFT74,NEK7,IQCB1,ITSN2,SSX2IP,CAPRIN2,MPLKIP,CEP295,LRIF1,HAUS6,CKAP5,TTC19,CEP350,CEP170,EVI5,CCDC66,ALMS1,GNAI1,CAMSAP2,RPGRIP1L,IFT57,ZNF322,MZT1,NR3C1,PPP4R3B,MASTL,CDC27,PCM1
GO: Cellular Component	GO:0005819	spindle		7.054e-06	0.005368	0.0006711	0.00484	21	359	SMC1A,ROCK2,CUL3,NEK7,IQCB1,CEP295,STAG2,HAUS6,CKAP5,SEPTIN6,CEP350,CEP170,EVI5,ALMS1,DYNLT3,MZT1,NR3C1,TERF1,RIF1,ARL8B,CDC27
GO: Cellular Component	GO:0005778	peroxisomal membrane		2.113e-05	0.01608	0.001608	0.0116	8	61	MPV17L,PEX7,ACSL4,FAR1,ABCD2,PEX3,ACBD5,PNPLA8
GO: Cellular Component	GO:0031903	microbody membrane		2.113e-05	0.01608	0.001608	0.0116	8	61	MPV17L,PEX7,ACSL4,FAR1,ABCD2,PEX3,ACBD5,PNPLA8
GO: Cellular Component	GO:1902494	catalytic complex		9.454e-05	0.07195	0.006541	0.04717	51	1536	CBLL1,SAXO2,ACVR2A,CHM,PNPT1,CDC40,UBE3A,UCHL5,ANKIB1,KDM6A,HSP90AA1,CUL3,SPATA6,RPP30,CWC22,WDR26,DIS3,PPP3CB,UBR3,SNRPB2,SNRPD1,PRPS2,KANSL1L,JADE3,KDM4C,PSMC6,TEX10,SUCLA2,SEPTIN6,RTF1,PSME4,DLD,GNAI1,CDC73,TAF4B,MGA,SPOPL,WWP1,SMC6,DYNLT3,SHOC2,CCNC,CCNG1,CCNH,PPP4R3B,DCUN1D1,GTF2H1,ATG3,NAA30,CDC27,PHF10
GO: Cellular Component	GO:0098687	chromosomal region		0.000248	0.1887	0.01573	0.1134	18	362	CENPW,SMC1A,FMR1,LRIF1,STAG2,WAPL,ATR,KDM4C,CKAP5,SEPTIN6,CDC73,SMC6,DYNLT3,THOC2,TERF1,ORC4,RIF1,HELLS
GO: Cellular Component	GO:1990234	transferase complex		0.0002934	0.2233	0.01718	0.1239	31	821	CBLL1,ACVR2A,CHM,ANKIB1,KDM6A,CUL3,WDR26,UBR3,SNRPD1,PRPS2,KANSL1L,JADE3,KDM4C,TEX10,RTF1,DLD,CDC73,TAF4B,MGA,SPOPL,WWP1,SMC6,CCNC,CCNG1,CCNH,DCUN1D1,GTF2H1,ATG3,NAA30,CDC27,PHF10
GO: Cellular Component	GO:0043005	neuron projection		0.0003619	0.2754	0.0191	0.1378	51	1624	ZC3H14,CETN3,USP9X,WLS,ADAM10,HNMT,PICALM,MTPN,SEMA3A,AP3S1,HSP90AA1,STRN3,FMR1,AR,IQCB1,LRRTM2,MAPK8,MAPK9,ATP2B1,GABRA1,GABRA4,GABRG2,CERKL,PTEN,SEPTIN6,BMPR1A,CCDC66,BRAF,SACS,GLRB,MTMR2,DLG1,CPEB2,GPM6A,RPGRIP1L,GOPC,IFT57,PTBP2,RTN4,GRIA2,OCRL,NR3C1,SHOC2,TTLL7,CCNG1,MAL2,USP8,OPTN,SH3GLB1,ARL8B,SLC4A10
GO: Cellular Component	GO:0070381	endosome to plasma membrane transport vesicle		0.0003765	0.2865	0.0191	0.1378	2	2	PICALM,RAB6A
GO: Cellular Component	GO:0005794	Golgi apparatus		0.0004735	0.3603	0.02252	0.1624	51	1643	ZDHHC2,GTPBP4,RXYLT1,ERGIC2,WLS,ADAM10,PICALM,AP3S1,OPALIN,WDR44,CUL3,STRN3,APOO,ARFGEF1,BLZF1,CASD1,VPS41,MPLKIP,TMEM30A,PNPLA8,PRKCI,DOP1A,CERKL,ZNF148,GALNT1,ATR,CASC4,EVI5,TDRD3,IMPAD1,CHPT1,FGD4,USP32,ANKRD28,DLG1,ATP11C,GOLGA5,RAB2A,CAMSAP2,RAB6A,TMEM167A,WASL,GOPC,IFT57,DNM1L,LAMP2,OCRL,OPTN,SH3GLB1,EBAG9,PDCD10
GO: Cellular Component	GO:0043291	RAVE complex		0.001094	0.8322	0.0474	0.3419	2	3	DMXL1,DMXL2
GO: Cellular Component	GO:0005769	early endosome		0.001121	0.8532	0.0474	0.3419	17	378	WLS,PICALM,ZFYVE9,VPS26A,ASAH1,VPS41,APPL1,SNX2,SNX13,NAE1,MTMR2,NIPA1,OCRL,TFRC,USP8,SH3GLB1,RABEP1
Pathway	1269741	Cell Cycle	BioSystems: REACTOME	2.324e-05	0.03573	0.03573	0.2828	30	624	CENPW,SMC1A,ESCO1,SYCP2,TAOK1,NIPBL,HSP90AA1,NEK7,SMC2,BLZF1,STAG2,HAUS6,WAPL,ATR,LIN54,CKAP5,PSMC6,PSME4,ALMS1,RAB2A,RANBP2,RBBP8,SMC4,TERF1,CCNH,ORC4,OPTN,MASTL,CDC27,PCM1
Pathway	1269830	Cohesin Loading onto Chromatin	BioSystems: REACTOME	5.8e-05	0.08914	0.03988	0.3156	4	11	SMC1A,NIPBL,STAG2,WAPL
Pathway	1269793	Establishment of Sister Chromatid Cohesion	BioSystems: REACTOME	8.555e-05	0.1315	0.03988	0.3156	4	12	SMC1A,ESCO1,STAG2,WAPL
Pathway	1269763	Cell Cycle, Mitotic	BioSystems: REACTOME	0.0001054	0.162	0.03988	0.3156	25	517	SMC1A,ESCO1,TAOK1,NIPBL,HSP90AA1,NEK7,SMC2,BLZF1,STAG2,HAUS6,WAPL,LIN54,CKAP5,PSMC6,PSME4,ALMS1,RAB2A,RANBP2,SMC4,CCNH,ORC4,OPTN,MASTL,CDC27,PCM1
Pathway	169348	Signaling events mediated by focal adhesion kinase	BioSystems: Pathway Interaction Database	0.0001346	0.2068	0.03988	0.3156	7	54	ROCK2,MAPK8,MAPK9,ITGAV,BRAF,WASL,RASA1
Pathway	138080	Aurora B signaling	BioSystems: Pathway Interaction Database	0.0001557	0.2393	0.03988	0.3156	6	39	CUL3,SMC2,NCL,EVI5,RASA1,SMC4
Pathway	1269829	Mitotic Telophase/Cytokinesis	BioSystems: REACTOME	0.0002243	0.3448	0.04926	0.3899	4	15	SMC1A,NIPBL,STAG2,WAPL
Disease	C0524851	Neurodegenerative Disorders	DisGeNET Curated	9.931e-06	0.03646	0.03646	0.3203	32	695	TPP2,HGF,GDAP1,ADAM10,TTR,UBE3A,HSP90AA1,FMR1,BLZF1,AR,ASAH1,ASPA,MAPK8,MAPK9,EIF2AK2,ATR,NCL,SUCLA2,TTC19,PTN,TCERG1,SACS,NECAB1,MTMR2,NIPA1,CASP1,NR3C1,GTF2H1,OPTN,SLC44A1,CDC27,MTDH

## Sheet: Module 06
Category	ID	Name	Source	p-value	q-value Bonferroni	q-value FDR B&H	q-value FDR B&Y	Hit Count in Query List	Hit Count in Genome	Hit in Query List
GO: Biological Process	GO:0044265	cellular macromolecule catabolic process		9.554e-08	0.000191	0.0001901	0.001555	18	1201	PCNP,CUL1,PLAA,STYX,TMTC3,KLHL15,USP25,HMGB1,NGLY1,QKI,PSMD14,TRIP12,ZRANB1,UBE2W,YTHDF3,PMAIP1,USP47,SYNCRIP
GO: Biological Process	GO:0051603	proteolysis involved in cellular protein catabolic process		1.902e-07	0.0003803	0.0001901	0.001555	14	735	PCNP,CUL1,PLAA,STYX,TMTC3,KLHL15,USP25,NGLY1,PSMD14,TRIP12,ZRANB1,UBE2W,PMAIP1,USP47
GO: Biological Process	GO:0009057	macromolecule catabolic process		3.254e-07	0.0006505	0.0002168	0.001773	19	1453	PCNP,CUL1,PLAA,STYX,ABHD17B,TMTC3,KLHL15,USP25,HMGB1,NGLY1,QKI,PSMD14,TRIP12,ZRANB1,UBE2W,YTHDF3,PMAIP1,USP47,SYNCRIP
GO: Biological Process	GO:0044257	cellular protein catabolic process		4.621e-07	0.0009238	0.000231	0.001889	14	791	PCNP,CUL1,PLAA,STYX,TMTC3,KLHL15,USP25,NGLY1,PSMD14,TRIP12,ZRANB1,UBE2W,PMAIP1,USP47
GO: Biological Process	GO:0030163	protein catabolic process		8.632e-07	0.001726	0.0003451	0.002822	15	964	PCNP,CUL1,PLAA,STYX,ABHD17B,TMTC3,KLHL15,USP25,NGLY1,PSMD14,TRIP12,ZRANB1,UBE2W,PMAIP1,USP47
GO: Biological Process	GO:0010498	proteasomal protein catabolic process		7.354e-06	0.0147	0.00245	0.02004	10	492	PCNP,CUL1,PLAA,STYX,TMTC3,KLHL15,USP25,PSMD14,UBE2W,PMAIP1
GO: Biological Process	GO:0006511	ubiquitin-dependent protein catabolic process		1.151e-05	0.02301	0.002791	0.02282	11	637	PCNP,CUL1,PLAA,STYX,KLHL15,USP25,PSMD14,TRIP12,ZRANB1,UBE2W,USP47
GO: Biological Process	GO:1901565	organonitrogen compound catabolic process		1.167e-05	0.02333	0.002791	0.02282	16	1348	PCNP,CUL1,PLAA,STYX,ABHD17B,TMTC3,KLHL15,GLS,USP25,NGLY1,PSMD14,TRIP12,ZRANB1,UBE2W,PMAIP1,USP47
GO: Biological Process	GO:0019941	modification-dependent protein catabolic process		1.257e-05	0.02512	0.002791	0.02282	11	643	PCNP,CUL1,PLAA,STYX,KLHL15,USP25,PSMD14,TRIP12,ZRANB1,UBE2W,USP47
GO: Biological Process	GO:0043632	modification-dependent macromolecule catabolic process		1.493e-05	0.02984	0.002984	0.0244	11	655	PCNP,CUL1,PLAA,STYX,KLHL15,USP25,PSMD14,TRIP12,ZRANB1,UBE2W,USP47
GO: Biological Process	GO:0006515	protein quality control for misfolded or incompletely synthesized proteins		0.0001237	0.2472	0.02247	0.1838	3	28	KLHL15,NGLY1,UBE2W
GO: Biological Process	GO:0070536	protein K63-linked deubiquitination		0.0002034	0.4066	0.03388	0.2771	3	33	USP25,PSMD14,ZRANB1
GO: Biological Process	GO:0006508	proteolysis		0.000232	0.4638	0.03567	0.2917	17	1915	PCNP,USP53,CUL1,PLAA,STYX,TMTC3,DYNC2H1,KLHL15,USP25,HMGB1,NGLY1,PSMD14,TRIP12,ZRANB1,UBE2W,PMAIP1,USP47
GO: Biological Process	GO:1900045	negative regulation of protein K63-linked ubiquitination		0.0003288	0.6572	0.04694	0.3839	2	8	PLAA,TRIP12
Pathway	1269229	TRAF6 mediated induction of NFkB and MAP kinases upon TLR7/8 or 9 activation	BioSystems: REACTOME	0.00022	0.1038	0.0205	0.138	4	91	CUL1,MAP2K4,TLR3,HMGB1
Pathway	1269227	Toll Like Receptor 7/8 (TLR7/8) Cascade	BioSystems: REACTOME	0.0002392	0.1129	0.0205	0.138	4	93	CUL1,MAP2K4,TLR3,HMGB1
Pathway	1269228	MyD88 dependent cascade initiated on endosome	BioSystems: REACTOME	0.0002392	0.1129	0.0205	0.138	4	93	CUL1,MAP2K4,TLR3,HMGB1
Pathway	1269233	Toll Like Receptor 9 (TLR9) Cascade	BioSystems: REACTOME	0.0002811	0.1327	0.0205	0.138	4	97	CUL1,MAP2K4,TLR3,HMGB1
Pathway	1269220	MyD88-independent TLR3/TLR4 cascade	BioSystems: REACTOME	0.000304	0.1435	0.0205	0.138	4	99	CUL1,MAP2K4,TLR3,HMGB1
Pathway	1269221	TRIF-mediated TLR3/TLR4 signaling	BioSystems: REACTOME	0.000304	0.1435	0.0205	0.138	4	99	CUL1,MAP2K4,TLR3,HMGB1
Pathway	1269219	Toll Like Receptor 3 (TLR3) Cascade	BioSystems: REACTOME	0.000304	0.1435	0.0205	0.138	4	99	CUL1,MAP2K4,TLR3,HMGB1
Pathway	1269636	Hedgehog off state	BioSystems: REACTOME	0.0003669	0.1732	0.02096	0.1412	4	104	CUL1,DYNC2H1,TTC21B,PSMD14
Pathway	137954	Arf6 trafficking events	BioSystems: Pathway Interaction Database	0.0003997	0.1887	0.02096	0.1412	3	44	RALA,EXOC5,EXOC2
Pathway	1269236	Activated TLR4 signalling	BioSystems: REACTOME	0.0005375	0.2537	0.02537	0.1709	4	115	CUL1,MAP2K4,TLR3,HMGB1
Pathway	1269234	Toll Like Receptor 4 (TLR4) Cascade	BioSystems: REACTOME	0.0007581	0.3578	0.03253	0.2191	4	126	CUL1,MAP2K4,TLR3,HMGB1
Pathway	1269896	Translocation of GLUT4 to the plasma membrane	BioSystems: REACTOME	0.001096	0.5171	0.04158	0.28	3	62	RALA,EXOC5,EXOC2
Pathway	1269633	Signaling by Hedgehog	BioSystems: REACTOME	0.001153	0.5443	0.04158	0.28	4	141	CUL1,DYNC2H1,TTC21B,PSMD14
Pathway	1309122	MAP3K8 (TPL2)-dependent MAPK1/3 activation	BioSystems: REACTOME	0.001233	0.5821	0.04158	0.28	2	16	CUL1,MAP2K4
Pathway	P04393	Ras Pathway	PantherDB	0.001432	0.6759	0.04506	0.3035	3	68	RALA,MAP2K4,EXOC2
Pathway	1269204	Toll-Like Receptors Cascades	BioSystems: REACTOME	0.001559	0.736	0.046	0.3098	4	153	CUL1,MAP2K4,TLR3,HMGB1

## Sheet: Module 07
Category	ID	Name	Source	p-value	q-value Bonferroni	q-value FDR B&H	q-value FDR B&Y	Hit Count in Query List	Hit Count in Genome	Hit in Query List
Disease	C2062441	Influenza A	DisGeNET BeFree	2.276e-05	0.03086	0.03086	0.2404	3	11	HIF1A,PDIK1L,RAB39B

## Sheet: Module 08
Category	ID	Name	Source	p-value	q-value Bonferroni	q-value FDR B&H	q-value FDR B&Y	Hit Count in Query List	Hit Count in Genome	Hit in Query List
GO: Molecular Function	GO:0019905	syntaxin binding		4.019e-05	0.02142	0.02142	0.1469	6	83	STXBP4,VPS54,PTPN2,TXLNB,STXBP3,SCFD1
GO: Cellular Component	GO:0016604	nuclear body		1.795e-05	0.007754	0.007754	0.05154	18	799	TCF12,SRSF5,RB1,CPSF6,KAT6A,CIR1,PARD3B,SREK1,INO80,PNISR,PIAS2,ZBTB1,DDX46,DENND1B,PRPF4B,KIF2A,ARIH1,PSPC1
GO: Cellular Component	GO:0016607	nuclear speck		3.853e-05	0.01665	0.008323	0.05532	12	406	TCF12,SRSF5,CPSF6,KAT6A,CIR1,SREK1,PNISR,PIAS2,DDX46,DENND1B,PRPF4B,PSPC1

[truncated: 51 more sheets: Module 09, Module 10, Module 11, Module 12, Module 13, Module 14, Module 15, Module 16, Module 17, Module 18, Module 19, Module 20, Module 21, Module 22, Module 23, Module 24, Module 25, Module 26, Module 27, Module 28 …]
