# Supplementary material for: An essential role for MEF2C in the cortical response to loss of sleep in mice
Source: eLife journal article supplement (doi:10.7554/elife.58331), 2020-08-27
Supplement: supp [file elife-58331-supp-v1.zip › elife_poa_e58331_Supplementary_file_5.xlsx]

## Sheet: DEG_Mef2cff_CS|SD
Gene	baseMean	log2FoldChange	lfcSE	stat	pvalue	padj
0610009O20Rik	942.992	-0.214664	0.0777986	-2.75923	0.00579377	0.0581393
1810055G02Rik	512.511	0.0424502	0.115914	0.366222	0.714199	0.859187
2410015M20Rik	1099.64	0.0160376	0.0921943	0.173955	0.861901	0.935277
2510009E07Rik	2469.19	0.0415821	0.0681422	0.610224	0.541713	0.753487
2700062C07Rik	362.901	-0.103852	0.107186	-0.968894	0.332598	0.586716
2810403A07Rik	2643.02	0.0308411	0.124376	0.247967	0.80416	0.90758
2900055J20Rik	522.44	0.183941	0.122744	1.49858	0.133982	0.366489
3110021N24Rik	48.4055	-0.147362	0.260641	-0.565384	0.571813	0.771729
3110082I17Rik	793.989	-0.421828	0.0933805	-4.51731	6.26305e-06	0.000497952
8030462N17Rik	6330.76	0.216359	0.138382	1.5635	0.117936	0.341674
9130011E15Rik	1955.7	-0.340083	0.0712635	-4.77219	1.82233e-06	0.000198266
9930104L06Rik	641.838	-0.0435236	0.100131	-0.434665	0.663806	0.828671
9930111J21Rik2	87.2841	-0.150951	0.212056	-0.711844	0.476561	0.704705
A2m	39.7149	0.52123	0.300973	1.73182	0.083306	0.285141
A4galt	132.372	-0.275353	0.192538	-1.43012	0.152681	0.39053
Aaas	306.743	-0.235502	0.13705	-1.71837	0.0857287	0.288468
Aacs	1264.06	-0.235199	0.13632	-1.72534	0.0844663	0.286239
Aaed1	260.325	-0.159797	0.122937	-1.29982	0.193662	0.445226
Aagab	2411.84	-0.045332	0.0724637	-0.625582	0.531589	0.745764
Aak1	21133.4	0.00438381	0.0576593	0.0760295	0.939396	0.974354
Aamdc	653.935	0.0394833	0.0835544	0.472546	0.636537	0.812749
Aamp	2584.3	0.0399899	0.0680805	0.58739	0.556942	0.763065
Aar2	939.061	0.11799	0.0729292	1.61787	0.105691	0.32071
Aard	56.5375	0.424961	0.255906	1.66061	0.0967916	0.306879
Aars	4228.81	-0.0220746	0.081654	-0.270344	0.786896	0.898368
Aars2	649.585	-0.0855544	0.104251	-0.820654	0.411843	0.654054
Aasdh	461.217	-0.117583	0.107072	-1.09817	0.272129	0.534475
Aasdhppt	1535.13	0.243324	0.118631	2.0511	0.0402573	0.188633
Aass	142.957	0.361247	0.164716	2.19315	0.0282964	0.154171
Aatf	1632.85	-0.201769	0.0715591	-2.81962	0.00480813	0.0518179
Aatk	4614.88	0.0542289	0.0909202	0.596446	0.550878	0.760507
Abat	7202.58	-0.112484	0.0899047	-1.25115	0.21088	0.465482
Abca1	2607.44	-0.116502	0.11936	-0.97606	0.329035	0.58342
Abca17	125.001	-0.0418673	0.152246	-0.274998	0.783318	0.896834
Abca2	6548.32	-0.192801	0.269717	-0.714827	0.474716	0.703789
Abca3	3635.3	-0.0956134	0.124987	-0.764987	0.444279	0.680306
Abca4	181.031	-0.802743	0.161208	-4.97954	6.37348e-07	8.78336e-05
Abca5	4353.46	0.301015	0.114991	2.61772	0.00885192	0.075927
Abca6	161.135	-0.0250055	0.154463	-0.161887	0.871395	0.94025
Abca7	663.031	-0.119346	0.111212	-1.07314	0.28321	0.54423
Abca8a	337.856	-0.62725	0.150622	-4.16439	3.1218e-05	0.00167618
Abca8b	2082.7	-0.0571351	0.0844307	-0.67671	0.49859	0.721929
Abca9	582.993	0.288795	0.104091	2.77446	0.00552941	0.0564455
Abcb10	704.896	-0.157663	0.089748	-1.75673	0.0789636	0.276288
Abcb1a	1110.67	-0.126082	0.124626	-1.01168	0.311691	0.571203
Abcb1b	360.874	-0.213438	0.130633	-1.63387	0.102286	0.3159
Abcb4	304.885	-0.148648	0.126214	-1.17774	0.238899	0.498328
Abcb7	2586.77	0.168398	0.123243	1.36639	0.171816	0.416327
Abcb8	913.014	-0.163549	0.0767843	-2.12997	0.0331737	0.168195
Abcb9	1379.16	-0.116208	0.10772	-1.0788	0.280677	0.54198
Abcc1	1426.81	-0.216665	0.100616	-2.15338	0.0312887	0.162515
Abcc10	268.42	-0.0727309	0.123985	-0.586611	0.557465	0.763077
Abcc3	94.9209	0.196379	0.209467	0.937516	0.348493	0.599963
Abcc4	1035.23	-0.159869	0.0862284	-1.85402	0.0637365	0.243838
Abcc5	7015.05	-0.057548	0.0632344	-0.910075	0.362783	0.611966
Abcc6	51.8465	-0.255215	0.255947	-0.99714	0.318696	0.576192
Abcc8	1168.62	-0.381852	0.116603	-3.2748	0.00105738	0.0199587
Abcc9	366.605	0.0266786	0.120752	0.220936	0.825142	0.917375
Abcd1	429.914	-0.337795	0.103721	-3.25679	0.00112682	0.0206174
Abcd2	2850.46	0.289375	0.109654	2.63899	0.00831529	0.07351
Abcd3	2920.72	0.0325847	0.0737575	0.441781	0.658647	0.825839
Abcd4	254.588	-0.0860641	0.119985	-0.717291	0.473195	0.70226
Abce1	4033.88	0.17307	0.0733941	2.35809	0.0183694	0.118912
Abcf1	2338.36	0.0642441	0.071864	0.893969	0.371339	0.618571
Abcf2	2378.24	-0.108453	0.110181	-0.984316	0.32496	0.581235
Abcf3	1633.68	-0.0270832	0.0807348	-0.335459	0.737279	0.87298
Abcg1	2905.26	-0.0716144	0.0605232	-1.18326	0.236708	0.495567
Abcg2	937.42	0.227486	0.139788	1.62737	0.103659	0.317922
Abcg4	969.282	-0.114291	0.132599	-0.861931	0.388725	0.633722
Abhd10	931.678	0.0635982	0.136497	0.465931	0.641265	0.815681
Abhd11	390.919	-0.0720338	0.130416	-0.55234	0.580715	0.777983
Abhd12	6315.69	-0.0649153	0.0930247	-0.697829	0.485284	0.711624
Abhd13	1850.92	0.211209	0.081139	2.60305	0.00923997	0.0782363
Abhd14a	723.436	0.0393856	0.0924575	0.425986	0.670118	0.83136
Abhd14b	255.356	-0.278225	0.165432	-1.68181	0.0926051	0.2995
Abhd15	146.924	0.260866	0.270983	0.962667	0.335715	0.588949
Abhd16a	1636.06	-0.15518	0.094393	-1.64397	0.100182	0.312278
Abhd17a	2119.81	0.179263	0.161196	1.11208	0.266102	0.527458
Abhd17b	1680.02	0.186827	0.138955	1.34452	0.178781	0.425305
Abhd17c	908.233	0.108475	0.0759896	1.42749	0.153438	0.391099
Abhd2	7414.12	-0.107257	0.0513105	-2.09036	0.0365856	0.17858
Abhd3	1356.42	0.146352	0.124109	1.17922	0.238311	0.497689
Abhd4	832.026	0.129067	0.0883147	1.46145	0.143892	0.378433
Abhd5	739.107	0.00307494	0.0905467	0.0339598	0.972909	0.989341
Abhd6	1471.68	0.0227944	0.0913057	0.249649	0.802858	0.907074
Abhd8	3044.82	0.142276	0.146959	0.968138	0.332975	0.586716
Abi1	6235.02	0.116898	0.115896	1.00864	0.313148	0.572661
Abi2	14150.1	0.121994	0.109596	1.11312	0.265656	0.526851
Abi3	120.468	-0.532788	0.181146	-2.9412	0.0032694	0.041474
Abi3bp	541.325	-0.629684	0.468374	-1.34441	0.178817	0.425305
Abl1	2410.14	-0.165711	0.076877	-2.15554	0.0311196	0.162039
Abl2	4813.17	-0.13894	0.129714	-1.07113	0.284113	0.545066
Ablim1	8353.5	-0.251472	0.0767841	-3.27506	0.00105639	0.0199587
Ablim2	7567.18	-0.325706	0.111606	-2.91835	0.00351885	0.0434619
Ablim3	1391.76	-0.823276	0.368458	-2.23438	0.0254581	0.145981
Abr	14185.6	-0.0538808	0.0995568	-0.541207	0.588365	0.782976
Abracl	399.13	0.33418	0.109221	3.05967	0.00221584	0.0318829
Abt1	372.719	0.209792	0.126004	1.66497	0.0959197	0.305292
Abtb1	766.829	-0.24993	0.142727	-1.7511	0.0799286	0.278128
Abtb2	650.974	-0.0765809	0.152941	-0.500723	0.616566	0.800148
Acaa1a	1144	0.0530699	0.13627	0.389447	0.696945	0.848609
Acaa2	362.79	-0.478723	0.171741	-2.78748	0.005312	0.0551264
Acaca	6457.4	-0.190198	0.0726174	-2.61918	0.00881419	0.075927
Acacb	84.1812	-0.188575	0.211505	-0.891585	0.372615	0.619947
Acad10	280.39	-0.203248	0.137469	-1.4785	0.139274	0.373029
Acad12	123.735	0.00137932	0.21961	0.00628074	0.994989	0.997766
Acad8	912.802	-0.0664923	0.091116	-0.729755	0.46554	0.696681
Acad9	1075.66	0.127531	0.0841395	1.51571	0.129594	0.360393
Acadl	495.079	0.0777559	0.117336	0.662678	0.507537	0.729529
Acadm	826.74	0.137281	0.0997926	1.37566	0.168925	0.412404
Acads	91.22	-0.0918016	0.220432	-0.416462	0.677072	0.835844
Acadsb	2399.75	-0.0532209	0.085812	-0.620204	0.535124	0.74869
Acadvl	830.406	0.147648	0.0751357	1.96508	0.0494052	0.213957
Acan	142.836	0.217206	0.148179	1.46584	0.142693	0.376742
Acap2	10852.5	0.120075	0.0670021	1.79211	0.0731158	0.265097
Acap3	2971.31	-0.0970531	0.127217	-0.762892	0.445528	0.681084
Acat1	3230.82	-0.09398	0.0698643	-1.34518	0.178567	0.425182
Acat2	1398.93	-0.397958	0.125067	-3.18197	0.00146279	0.0246849
Acat3	216.295	-0.44522	0.174748	-2.54778	0.0108412	0.0863603
Acbd3	1421.32	0.102652	0.0919319	1.11661	0.264163	0.525655
Acbd4	645.902	-0.0162219	0.10716	-0.151381	0.879675	0.944069
Acbd5	3530.28	0.19207	0.129678	1.48113	0.138572	0.372176
Acbd6	3017.32	-0.0533332	0.0902244	-0.591117	0.554442	0.76163
Accs	116.392	-0.334958	0.204894	-1.63479	0.102093	0.315539
Acd	382.613	0.0417287	0.0937843	0.444944	0.656361	0.824779
Ace	353.601	-0.152622	0.198228	-0.769932	0.44134	0.678476
Acer2	192.823	0.068502	0.244922	0.279689	0.779716	0.894866
Acer3	2221.55	0.0995779	0.115974	0.858621	0.39055	0.635258
Ache	618.85	0.120551	0.110043	1.09548	0.273305	0.535586
Acin1	4420.06	-0.0484001	0.0619833	-0.780856	0.434887	0.674396
Ackr1	534.234	0.152733	0.130859	1.16715	0.243148	0.50313
Ackr2	105.135	0.131118	0.268308	0.488684	0.625065	0.80539
Ackr3	200.98	0.358108	0.140083	2.55639	0.0105765	0.0849614
Acly	5499.87	-0.147165	0.104682	-1.40583	0.159776	0.400992
Aco1	1416.78	-0.0971552	0.0735326	-1.32125	0.186417	0.434856
Aco2	11685.3	-0.115858	0.10668	-1.08604	0.277463	0.538387
Acot1	129.794	0.48056	0.171544	2.80138	0.00508844	0.0535033
Acot11	1049.61	0.188411	0.0927353	2.03171	0.0421835	0.194499
Acot13	1251.69	-0.0816735	0.113732	-0.718122	0.472682	0.702165
Acot2	158.148	0.180919	0.182534	0.991154	0.32161	0.578534
Acot3	59.6118	0.0840586	0.25912	0.3244	0.745635	0.877014
Acot5	54.5054	0.790132	0.289629	2.72808	0.00637046	0.0623621
Acot6	194.762	0.0608055	0.132428	0.459158	0.646121	0.81824
Acot7	3952.81	-0.275357	0.136196	-2.02177	0.0432003	0.196485
Acot8	428.276	-0.0841241	0.123126	-0.683236	0.494458	0.718343
Acot9	903.242	0.0124955	0.0741382	0.168543	0.866156	0.937838
Acox1	5988.07	-0.0049657	0.0594997	-0.0834575	0.933488	0.970336
Acox3	941.554	-0.120467	0.0781574	-1.54134	0.123234	0.349924
Acp1	1769.88	0.171388	0.107084	1.6005	0.109488	0.326872
Acp2	1984.67	0.073806	0.0632741	1.16645	0.243433	0.503133
Acp6	503.307	-0.319409	0.0851602	-3.75069	0.000176351	0.0060422
Acrbp	169.073	-0.305074	0.170506	-1.78922	0.073579	0.266453
Acsbg1	2575.05	0.0208831	0.0928492	0.224914	0.822046	0.916068
Acsf2	158.551	0.0523861	0.149447	0.350534	0.725938	0.866274
Acsl1	2364.2	-0.0488366	0.0636379	-0.767414	0.442835	0.679259
Acsl3	6795.54	0.304912	0.100282	3.04055	0.00236147	0.0334353
Acsl4	5356.3	0.34606	0.100728	3.43559	0.000591258	0.0133125
Acsl5	2904.5	0.0465269	0.0591339	0.786807	0.431395	0.672269
Acsl6	7979.82	0.102175	0.0681361	1.49958	0.133724	0.366256
Acss1	961.565	-0.324152	0.0870756	-3.72265	0.000197146	0.00653266
Acss2	2020.04	-0.0687698	0.0858515	-0.801032	0.423113	0.664802
Acss3	63.5643	-0.325023	0.224495	-1.4478	0.147674	0.384063
Acta1	200.727	-0.059369	0.205709	-0.288607	0.772882	0.890567
Acta2	176.857	0.224833	0.199711	1.12579	0.260254	0.521219
Actb	39936.3	-0.0688763	0.136979	-0.502823	0.615089	0.79894
Actg1	9700.44	-0.0522897	0.12392	-0.421963	0.673052	0.83337
Actl6a	552.608	-0.0443655	0.117647	-0.377108	0.706093	0.853917
Actl6b	1594.67	-0.344538	0.132124	-2.60769	0.0091155	0.0774694
Actn1	2788.51	-0.0581913	0.0860154	-0.676522	0.498709	0.721929
Actn2	952.359	-0.516057	0.298004	-1.73171	0.0833246	0.285141
Actn4	3111.05	-0.0441782	0.112514	-0.392645	0.694582	0.84659
Actr10	4471.62	0.144694	0.0959849	1.50747	0.131691	0.363454
Actr1a	4951.46	-0.184896	0.115324	-1.60328	0.108873	0.325937
Actr1b	7314	0.0428058	0.102427	0.417915	0.67601	0.835429
Actr2	12566.7	0.226044	0.110409	2.04733	0.0406255	0.189642
Actr3	7529.18	0.120743	0.0653615	1.84731	0.0647024	0.246281
Actr3b	4909.94	-0.287199	0.0795088	-3.61217	0.000303644	0.00840648
Actr5	336.3	-0.419046	0.157451	-2.66144	0.00778066	0.0710306
Actr6	822.415	0.062081	0.115999	0.535186	0.592521	0.785549
Actr8	1900.59	-0.125237	0.0895332	-1.39877	0.161882	0.403476
Acvr1	2321.94	-0.219977	0.13238	-1.66171	0.0965717	0.306573
Acvr1b	4475.38	-0.0497599	0.0828579	-0.600545	0.548143	0.758097
Acvr1c	2912.65	0.127611	0.103808	1.22929	0.218963	0.476232
Acvr2a	3359.48	0.158581	0.150007	1.05716	0.29044	0.550149
Acvr2b	249.686	-0.470238	0.171762	-2.73772	0.00618663	0.0609959
Acvrl1	334.322	-0.301231	0.186802	-1.61257	0.106838	0.322443
Acy1	202.942	0.00298057	0.190819	0.0156199	0.987538	0.995643
Acyp1	582.451	0.236049	0.173216	1.36274	0.172963	0.417854
Acyp2	2712.35	-0.171104	0.118092	-1.4489	0.147365	0.383762
Adal	673.352	0.057695	0.0852708	0.676609	0.498654	0.721929
Adam10	4800.21	0.0688145	0.100058	0.687746	0.491613	0.716339
Adam11	2158.37	-0.00541496	0.106853	-0.0506769	0.959583	0.983287
Adam12	453.851	-0.262388	0.167622	-1.56536	0.117499	0.340944
Adam15	977.38	0.062871	0.0984143	0.63884	0.522927	0.740565
Adam17	952.553	0.0599801	0.0967976	0.619645	0.535492	0.749002
Adam18	177.112	0.040213	0.194427	0.206829	0.836144	0.922902
Adam19	1091.3	0.222258	0.119519	1.85961	0.0629407	0.242514
Adam21	81.5194	-0.257474	0.234371	-1.09857	0.271955	0.534226
Adam22	20989.6	-0.0234902	0.0603612	-0.389161	0.697157	0.848644
Adam23	11369.6	-0.192803	0.0749467	-2.57254	0.0100955	0.08235
Adam32	125.769	-0.357655	0.182643	-1.95822	0.0502038	0.215982
Adam33	209.404	-0.292806	0.174938	-1.67377	0.0941758	0.30245
Adam8	70.5794	-0.129859	0.255985	-0.507292	0.61195	0.797354
Adam9	2361.58	0.0806782	0.0769355	1.04865	0.294341	0.554276
Adamts1	329.913	-0.200775	0.137144	-1.46397	0.143201	0.377336
Adamts10	585.006	-0.164081	0.112421	-1.45952	0.144423	0.378935
Adamts12	49.8305	-0.255666	0.234881	-1.08849	0.27638	0.537911
Adamts13	48.4101	0.0305589	0.309877	0.0986159	0.921443	0.964281
Adamts15	208.025	-0.65378	0.193819	-3.37315	0.000743137	0.0153875
Adamts16	320.005	-0.352178	0.204931	-1.71852	0.0857018	0.288468
Adamts17	1439.14	-0.0383724	0.0814471	-0.471133	0.637546	0.813658
Adamts18	306.557	-0.254132	0.186678	-1.36134	0.173407	0.418518
Adamts2	449.959	0.110787	0.099805	1.11004	0.266984	0.528471
Adamts20	1061.97	-0.146423	0.120267	-1.21748	0.223422	0.481171
Adamts3	1827.93	-0.18838	0.110432	-1.70584	0.0880386	0.292511
Adamts4	493.041	0.27801	0.116838	2.37945	0.0173387	0.11445
Adamts5	99.411	-0.115081	0.264929	-0.434384	0.66401	0.828671
Adamts6	519.897	0.045772	0.163255	0.280371	0.779193	0.894431
Adamts8	83.5106	-0.538677	0.214643	-2.50964	0.0120854	0.0922933
Adamts9	232.048	-0.445282	0.168545	-2.64193	0.00824359	0.0732063
Adamtsl1	919.421	-0.447678	0.276286	-1.62035	0.105158	0.32071
Adamtsl2	200.066	-0.259389	0.180689	-1.43556	0.151129	0.389349
Adamtsl3	164.204	-0.0774132	0.175354	-0.441469	0.658874	0.825885
Adamtsl4	101.442	-0.24978	0.168178	-1.48521	0.137488	0.371056
Adamtsl5	114.71	0.346399	0.215423	1.60799	0.107837	0.324166
Adap1	4649.86	-0.0452997	0.0899985	-0.503338	0.614726	0.798623
Adap2	312.101	0.0587552	0.181655	0.323444	0.746359	0.877392
Adar	6614.68	-0.186712	0.0922949	-2.023	0.0430734	0.196118
Adarb1	8080.2	-0.126262	0.104058	-1.21338	0.224984	0.483032
Adarb2	9257.4	-0.740748	0.42946	-1.72484	0.0845571	0.286391
Adat1	372.099	-0.0922489	0.107442	-0.858593	0.390565	0.635258
Adat2	197.015	-0.104009	0.166068	-0.626302	0.531117	0.745439
Adck1	1825.34	-0.311911	0.0731183	-4.26584	1.99152e-05	0.00120492
Adck2	390.634	-0.210238	0.11848	-1.77446	0.0759871	0.270902
Adck5	319.528	-0.187472	0.099153	-1.89073	0.05866	0.234545
Adcy1	35493.4	0.132624	0.107867	1.22952	0.218875	0.476203
Adcy10	50.0761	-0.0578983	0.285626	-0.202707	0.839364	0.924322
Adcy2	14974.9	-0.15628	0.110237	-1.41767	0.156286	0.395838
Adcy3	1840.07	-0.0585773	0.11721	-0.499765	0.617241	0.800296
Adcy5	7109.78	-0.311327	0.324937	-0.958117	0.338004	0.591793
Adcy6	1275.3	0.0207247	0.110528	0.187507	0.851263	0.929502
Adcy7	204.924	-0.115719	0.168532	-0.686633	0.492314	0.716771
Adcy8	2878.19	-0.360201	0.257182	-1.40057	0.161343	0.403374
Adcy9	7149.95	-0.0721224	0.0976472	-0.738602	0.460149	0.69311
Adcyap1	521.354	-0.0143139	0.141956	-0.100833	0.919683	0.963111
Adcyap1r1	4369.33	-0.148765	0.103515	-1.43714	0.150678	0.38886
Add1	11270.2	0.0302918	0.0766508	0.395192	0.692701	0.845627
Add2	13625.9	-0.000441005	0.0854804	-0.00515914	0.995884	0.998218
Add3	5511.13	-0.231138	0.0710113	-3.25494	0.00113416	0.0206174
Adgb	37.5777	-0.54947	0.323573	-1.69813	0.0894827	0.295095
Adgra1	2237.39	-0.00110755	0.148526	-0.00745694	0.99405	0.997751
Adgra2	311.006	-0.302885	0.122151	-2.47959	0.0131532	0.097274
Adgra3	790.217	-0.00353687	0.105548	-0.0335096	0.973268	0.989413
Adgrb1	9566.38	-0.210993	0.129203	-1.63304	0.10246	0.31628
Adgrb2	7511.32	0.0808966	0.113559	0.712375	0.476233	0.704438
Adgrb3	50191.7	-0.00296148	0.14693	-0.0201557	0.983919	0.99426
Adgrd1	308.88	0.132531	0.1421	0.932655	0.350998	0.601967
Adgre1	232.693	0.0128021	0.140633	0.0910315	0.927468	0.96724
Adgre5	225.525	-0.343766	0.134456	-2.55672	0.0105663	0.0849348
Adgrf2	114.635	-0.0801255	0.22389	-0.357878	0.720434	0.863112
Adgrf4	116.091	0.507781	0.195603	2.59598	0.00943224	0.0792599
Adgrf5	1209.52	-0.142147	0.090584	-1.56923	0.116595	0.339706
Adgrg1	674.825	0.0302088	0.177586	0.170108	0.864925	0.937241
Adgrg6	330.607	-0.494858	0.219085	-2.25875	0.0238987	0.140382
Adgrl1	17217.8	0.0650474	0.101416	0.641389	0.52127	0.739215
Adgrl2	6429.02	0.0821577	0.0847956	0.968891	0.332599	0.586716
Adgrl3	28748.4	0.131332	0.123594	1.06261	0.287961	0.548545
Adgrl4	797.983	-0.0302552	0.148736	-0.203415	0.838811	0.924138
Adgrv1	172.433	0.0496516	0.1788	0.277694	0.781247	0.895934
Adh5	1188.78	-0.00663113	0.105195	-0.0630368	0.949737	0.978627
Adhfe1	446.842	0.0845623	0.169114	0.50003	0.617054	0.800296
Adi1	400.614	0.0828767	0.0936576	0.88489	0.376216	0.622908
Adipor1	1564.72	0.292393	0.0891556	3.27958	0.0010396	0.0197461
Adipor2	2219.67	0.196516	0.0928165	2.11725	0.0342382	0.171371
Adk	4937.16	-0.15619	0.12918	-1.20909	0.226627	0.484964
Adnp2	1294.2	-0.215294	0.0765559	-2.81225	0.00491966	0.0526022
Ado	1973.45	0.220174	0.0660597	3.33296	0.000859265	0.0171342
Adora1	5488.52	0.290374	0.0920524	3.15445	0.00160802	0.0260867
Adora2a	599.549	-0.280962	0.538779	-0.52148	0.602032	0.790327
Adora2b	61.1346	-0.0787961	0.25036	-0.314731	0.752966	0.880732
Adpgk	574.231	-0.0358452	0.113429	-0.316015	0.751991	0.880233
Adprh	1197.75	0.217851	0.0860075	2.53293	0.0113114	0.0885702
Adprhl2	361.635	-0.0247491	0.115194	-0.214847	0.829887	0.920093
Adprm	603.949	0.00243629	0.139728	0.017436	0.986089	0.995489
Adra1a	1684.75	-0.190034	0.173574	-1.09483	0.27359	0.535818
Adra1b	605.544	0.322886	0.137968	2.34029	0.0192687	0.122528
Adra1d	384.21	0.239029	0.201453	1.18652	0.235417	0.494224
Adra2a	172.852	0.193726	0.20213	0.958424	0.337849	0.591739
Adra2c	370.716	0.057388	0.200032	0.286894	0.774193	0.891433
Adrb1	340.571	0.0672798	0.113865	0.590874	0.554605	0.76163
Adrbk1	4262.02	-0.0146973	0.130818	-0.112349	0.910546	0.958714
Adrbk2	4952.69	-0.253521	0.0831258	-3.04985	0.00228952	0.0327531
Adrm1	825.349	-0.0106069	0.101314	-0.104694	0.916619	0.961992
Adsl	726.567	-0.125871	0.0956778	-1.31557	0.18832	0.437321
Adss	3371.01	0.225678	0.110974	2.0336	0.0419917	0.193759
Adssl1	394.93	-0.105006	0.117204	-0.895919	0.370296	0.618065
Aebp1	307.95	-0.0541333	0.133904	-0.40427	0.686014	0.840929
Aebp2	3117.29	0.109605	0.0927705	1.18146	0.237419	0.496578
Aen	493.731	0.0715148	0.0991009	0.721637	0.470518	0.701085
Aes	4028.66	-0.0305181	0.085101	-0.35861	0.719887	0.8629
Afap1	1116.15	-0.271001	0.118159	-2.29353	0.0218176	0.132584
Afap1l1	1145.32	-0.00667878	0.0894231	-0.0746874	0.940463	0.974667
Afap1l2	336.779	-0.239483	0.12757	-1.87726	0.0604828	0.237846
Aff1	913.047	-0.0807134	0.115937	-0.696184	0.486314	0.712299
Aff2	2978.64	0.178392	0.145778	1.22373	0.221055	0.4787
Aff3	7033.21	-0.236764	0.152931	-1.54818	0.121579	0.347559
Aff4	11918.3	0.103714	0.0664344	1.56114	0.11849	0.342668
Afg3l2	2667.81	0.0114783	0.0550586	0.208475	0.834858	0.922068
Aftph	4881.14	0.112665	0.0895573	1.25802	0.208383	0.462865
Aga	258.314	0.0314107	0.124769	0.25175	0.801234	0.906674
Agap1	7657.33	-0.205015	0.105092	-1.95081	0.0510802	0.217232
Agap2	13034.1	0.137093	0.0840474	1.63114	0.102861	0.316573
Agap3	3517.56	-0.19497	0.111049	-1.75571	0.0791373	0.276646
Agbl1	153.444	-0.313373	0.182563	-1.71652	0.0860671	0.289214
Agbl2	44.7755	-0.787649	0.286326	-2.75088	0.00594351	0.0592583
Agbl3	446.783	-0.0312239	0.194599	-0.160452	0.872525	0.94049
Agbl4	15874.5	-0.232438	0.152116	-1.52803	0.126505	0.355109
Agbl5	248.522	-0.193988	0.134779	-1.4393	0.150064	0.387831
Agfg1	6630.73	0.0964694	0.112721	0.855821	0.392097	0.636042
Agfg2	1115.84	-0.014149	0.11664	-0.121304	0.90345	0.954868
Aggf1	2085.13	0.122422	0.0611292	2.00268	0.0452119	0.202296
Agk	1716.27	0.0362248	0.0839756	0.431373	0.666197	0.829197
Agl	1723.45	0.0738586	0.0641531	1.15129	0.249614	0.510678
Agmat	43.1813	0.211043	0.288533	0.731433	0.464515	0.695957
Agmo	555.165	0.125596	0.167965	0.747751	0.45461	0.688381
Ago1	2105.03	-0.113104	0.0777839	-1.45407	0.145926	0.381401
Ago2	4010.2	0.142336	0.0698889	2.0366	0.04169	0.192896
Ago3	3909.99	0.215129	0.0887274	2.42461	0.0153248	0.106386
Ago4	709.094	-0.12849	0.0934908	-1.37436	0.169331	0.412859
Agpat1	3366.8	0.0294158	0.0999512	0.294301	0.768528	0.889018
Agpat3	6322.91	0.0712333	0.0560315	1.27131	0.203619	0.458096
Agpat4	2140.34	-0.262587	0.108317	-2.42426	0.0153397	0.106386
Agpat5	2651.77	0.17776	0.0653799	2.71887	0.00655052	0.0632981
Agpat9	190.189	-0.239356	0.156663	-1.52784	0.126552	0.355119
Agps	3191.34	0.0791273	0.111858	0.707394	0.479322	0.706984
Agrn	4109.38	-0.227582	0.118563	-1.9195	0.0549209	0.226082
Agrp	72.5018	-0.302626	0.234455	-1.29077	0.196785	0.448662
Agt	71.6873	-0.321677	0.266662	-1.20631	0.2277	0.486289
Agtpbp1	14701.3	0.016281	0.0730363	0.222917	0.8236	0.916729
Agtrap	159.203	0.0399179	0.201856	0.197754	0.843237	0.926061
Ahctf1	4041.38	0.155707	0.085094	1.82982	0.0672763	0.252134
Ahcy	384.062	-0.132759	0.107776	-1.23181	0.218021	0.475072
Ahcyl1	9423.82	0.151531	0.0617875	2.45245	0.0141886	0.102196
Ahcyl2	7517.71	-0.0930264	0.0971826	-0.957233	0.33845	0.592222
Ahdc1	2067.28	-0.250948	0.104411	-2.40345	0.0162412	0.109777
Ahi1	9921.37	-0.281027	0.0855718	-3.28411	0.00102306	0.0195517
Ahnak	3804.24	0.16518	0.0880905	1.87511	0.060777	0.23842
Ahnak2	54.2857	0.394704	0.265511	1.48658	0.137125	0.370455
Ahr	599.394	0.115021	0.0914003	1.25843	0.208235	0.462865
Ahrr	43.8824	-0.459138	0.295849	-1.55193	0.120678	0.346313
Ahsa1	2540.86	0.000726543	0.122821	0.00591549	0.99528	0.997932
Ahsa2	1041.88	0.0185129	0.0915731	0.202165	0.839788	0.924512
AI846148	1451.85	-0.213142	0.0910939	-2.3398	0.019294	0.122528
Aida	1221.99	0.108506	0.106884	1.01517	0.310026	0.569011
Aif1	166.675	0.0040407	0.167207	0.0241659	0.98072	0.993477
Aif1l	195.325	-0.0635947	0.135129	-0.470621	0.637911	0.813929
Aifm1	1110.8	-0.0472895	0.0829168	-0.570325	0.568458	0.76956
Aifm2	173.395	-0.194544	0.164196	-1.18482	0.236087	0.494743
Aifm3	2507.04	-0.148239	0.102351	-1.44834	0.147522	0.384035
Aig1	4376.71	-0.233158	0.13646	-1.70862	0.0875215	0.29171
Aim2	248.963	-0.262626	0.14426	-1.8205	0.0686826	0.255587
Aimp1	1458.14	0.0478527	0.0825912	0.579392	0.562325	0.766222
Aimp2	483.664	-0.127133	0.121096	-1.04985	0.293786	0.553605
Aip	1157.27	-0.237038	0.185249	-1.27957	0.200698	0.454243
Ajap1	2097.35	-0.273389	0.0899827	-3.03824	0.00237965	0.0335395
Ak1	2805.29	-0.0310706	0.096096	-0.323329	0.746446	0.877392
Ak2	664.991	-0.135617	0.100703	-1.3467	0.178077	0.424667
Ak3	2164.54	0.160689	0.0708462	2.26813	0.0233211	0.138077
Ak4	1449.77	0.160025	0.0970143	1.6495	0.0990454	0.310534
Ak5	5238.97	-0.159883	0.0934028	-1.71176	0.0869415	0.290735
Ak6	813.295	-0.0123337	0.0949165	-0.129943	0.896612	0.951924
Ak8	80.6159	-0.481472	0.203845	-2.36195	0.0181789	0.117978
Akain1	178.029	-0.163957	0.171269	-0.95731	0.338411	0.592222
Akap1	1524.65	-0.199784	0.0851196	-2.3471	0.0189202	0.12148
Akap10	2427.41	-0.109103	0.0801281	-1.36161	0.173321	0.418475
Akap11	16521.3	0.11124	0.0527139	2.11027	0.0348352	0.17331
Akap12	1328.57	0.0207648	0.0831499	0.249727	0.802798	0.907074
Akap13	2391.56	0.0462875	0.103054	0.449158	0.653317	0.822902
Akap17b	1600.31	-0.15729	0.103605	-1.51817	0.128972	0.35913
Akap5	5653.99	0.249881	0.100682	2.48189	0.0130689	0.0967722
Akap6	26062.6	-0.0604347	0.0538488	-1.1223	0.261733	0.522749
Akap7	2411.65	-0.13616	0.0721473	-1.88725	0.0591271	0.235339
Akap8	3230.08	-0.14871	0.063699	-2.33458	0.0195656	0.123623
Akap8l	4109.58	-0.307369	0.0552966	-5.55855	2.7203e-08	7.1787e-06
Akap9	8779.95	-0.0147241	0.0792229	-0.185856	0.852557	0.930116
Akip1	63.1866	0.136947	0.275766	0.496608	0.619466	0.801974
Akirin1	1918.96	0.23794	0.112417	2.11658	0.0342954	0.171518
Akirin2	1856.87	0.0692262	0.0612165	1.13084	0.258121	0.519048
Akna	119.273	-0.152395	0.161827	-0.941719	0.346336	0.598135
Akr1a1	5814.2	-0.0693902	0.0947901	-0.732041	0.464144	0.695772
Akr1b10	307.22	-0.0030839	0.114557	-0.0269202	0.978523	0.992295
Akr1b3	697.688	0.00705142	0.108706	0.0648671	0.94828	0.977973
Akr1c18	44.8185	0.229615	0.327333	0.70147	0.48301	0.710003
Akr1e1	989.861	0.0572899	0.0796891	0.718918	0.472192	0.701845
Akr7a5	249.844	0.122271	0.111969	1.09201	0.274828	0.536816
Akt1	2206.68	-0.114481	0.0869172	-1.31713	0.187796	0.437042
Akt1s1	635.29	0.0785787	0.101032	0.777759	0.436711	0.675967
Akt2	3042.78	0.0482439	0.0685113	0.704174	0.481325	0.709011
Akt3	20161.4	0.123066	0.0984074	1.25058	0.211088	0.465692
Aktip	3519.34	-0.0139267	0.0822644	-0.169292	0.865567	0.937364
Alad	316.354	-0.200006	0.143555	-1.39324	0.163549	0.405333
Alas1	1411.82	-0.0672063	0.0984391	-0.682719	0.494784	0.718343
Alas2	143.503	-0.793171	0.165602	-4.78962	1.67095e-06	0.000183406
Alcam	12337.4	0.0572065	0.0899611	0.635903	0.52484	0.741565
Aldh16a1	142.767	-0.0922143	0.14777	-0.624038	0.532603	0.746764
Aldh18a1	834.904	0.133516	0.0772102	1.72925	0.0837643	0.285656
Aldh1a1	869.871	0.336579	0.155773	2.1607	0.0307185	0.161168
Aldh1a2	195.534	-0.455063	0.156015	-2.91679	0.00353653	0.0435586
Aldh1a3	37.8265	0.358408	0.346729	1.03368	0.301284	0.560748
Aldh1b1	239.929	0.173862	0.118186	1.47108	0.141269	0.375803
Aldh1l1	1733.88	0.00743613	0.10337	0.0719372	0.942652	0.975745
Aldh1l2	203.881	-0.304188	0.143231	-2.12376	0.0336901	0.1694
Aldh2	1273.85	-0.0785559	0.0812255	-0.967134	0.333477	0.587083
Aldh3a2	1463.31	-0.00159629	0.0627071	-0.0254563	0.979691	0.992819
Aldh3b1	81.747	-0.245883	0.212531	-1.15693	0.247303	0.509095
Aldh5a1	2809.09	0.010542	0.0700845	0.150419	0.880434	0.944428
Aldh6a1	1523.82	-0.0285318	0.112658	-0.25326	0.800067	0.906314
Aldh7a1	2214.66	-0.107877	0.0643365	-1.67676	0.0935889	0.30158
Aldh9a1	432.063	-0.0522328	0.122631	-0.425935	0.670155	0.83136
Aldoa	33971.1	-0.007851	0.114594	-0.0685115	0.945378	0.977193
Aldob	73.4757	-0.808719	0.193773	-4.17353	2.99911e-05	0.00163149
Aldoc	13703.6	0.0338691	0.110844	0.305557	0.759942	0.885062
Alg1	507.259	-0.224114	0.160865	-1.39318	0.163564	0.405333
Alg10b	1443.83	0.283549	0.0955723	2.96685	0.00300865	0.0394376
Alg11	1453.08	0.103966	0.103745	1.00213	0.316283	0.574777
Alg12	457.63	-0.0789339	0.105866	-0.745604	0.455907	0.689839
Alg13	719.491	0.0512134	0.15955	0.320986	0.748221	0.878391
Alg14	459.422	0.138747	0.156388	0.887197	0.374973	0.62168
Alg2	3189.15	0.0906137	0.0767052	1.18132	0.237474	0.496609
Alg3	170.699	-0.179043	0.206779	-0.865865	0.386564	0.631694
Alg5	364.3	0.0362467	0.112773	0.321411	0.747899	0.878333
Alg6	751.471	-0.155926	0.135933	-1.14708	0.251347	0.512411
Alg8	302.495	-0.0315	0.140224	-0.224641	0.822259	0.916108
Alg9	864.192	-0.15632	0.0754456	-2.07195	0.0382701	0.182998
Alk	1126.97	-0.390718	0.168253	-2.3222	0.0202221	0.126105
Alkbh1	876.613	0.0180009	0.117312	0.153445	0.878047	0.943384
Alkbh2	95.4366	0.396288	0.228701	1.73277	0.0831359	0.284906
Alkbh3	561.672	-0.219294	0.108139	-2.02788	0.0425725	0.195204
Alkbh4	139.736	0.176442	0.167702	1.05212	0.292745	0.552651
Alkbh5	2066.7	0.212833	0.0600019	3.54711	0.000389481	0.0100015
Alkbh6	499.562	-0.109696	0.171512	-0.639583	0.522444	0.740219
Alkbh7	279.177	-0.188568	0.171378	-1.10031	0.271197	0.533408
Alkbh8	2593.27	0.241438	0.0954978	2.52821	0.0114646	0.0892628
Alms1	1697.57	0.00864739	0.119715	0.0722333	0.942416	0.975721
Alox12b	93.1591	0.567647	0.26158	2.17007	0.0300015	0.159225
Alox5ap	65.7149	0.0810276	0.303718	0.266785	0.789634	0.899733
Alox8	81.1768	-0.174536	0.270515	-0.645198	0.518799	0.737666
Aloxe3	101.557	-0.130689	0.190834	-0.684832	0.49345	0.717751
Alpk1	240.806	-0.336532	0.120447	-2.79403	0.00520555	0.0543014
Alpl	120.99	-0.217404	0.203375	-1.06898	0.285077	0.546045
Als2	2077.49	0.0656633	0.06949	0.944931	0.344694	0.597473
Als2cl	171.882	-0.0457765	0.159759	-0.286534	0.774469	0.891484
Alx4	47.4278	-0.264957	0.234942	-1.12775	0.259424	0.520316
Alyref	794.958	0.0874763	0.0998277	0.876273	0.380882	0.626701
Alyref2	75.0389	0.268286	0.261996	1.02401	0.305832	0.564469
Amacr	221.516	-0.204567	0.133348	-1.53408	0.125009	0.352623
Ambra1	4742.12	-0.12722	0.0852883	-1.49164	0.135793	0.368866
Amd1	3220.19	0.228375	0.0932514	2.44902	0.0143244	0.102815
Amd2	52.2213	0.815205	0.482661	1.68898	0.0912232	0.297063
Amdhd2	401.359	-0.297454	0.109727	-2.71087	0.00671079	0.0641247
Amer1	525.677	-0.0192165	0.100168	-0.191842	0.847866	0.928677
Amer2	535.076	0.253532	0.121623	2.08458	0.0371077	0.180277
Amer3	862.983	-0.0449659	0.117335	-0.383225	0.701553	0.851155
Amfr	4653.86	-0.00617553	0.0650597	-0.0949211	0.924378	0.966129
Amigo1	2563	0.122234	0.0636503	1.92039	0.0548085	0.225844
Amigo2	133.63	0.206632	0.228924	0.902625	0.366725	0.615013
Ammecr1	1063.46	-0.15034	0.169881	-0.884971	0.376172	0.622908
Ammecr1l	1298.6	0.055362	0.0929565	0.595569	0.551463	0.760651
Amn	51.7961	-0.0637705	0.397897	-0.160269	0.872669	0.94049
Amn1	1011.73	0.0833616	0.144922	0.575216	0.565145	0.767323
Amot	1048.83	0.117092	0.0956501	1.22417	0.220889	0.478549
Amotl1	971.354	-0.147463	0.0841986	-1.75137	0.0798829	0.278128
Amotl2	445.302	0.0109446	0.0996113	0.109873	0.91251	0.959792
Ampd2	1166.12	-0.11398	0.132828	-0.8581	0.390837	0.635258
Ampd3	788.044	-0.454936	0.0857091	-5.30791	1.10891e-07	2.06791e-05
Amph	10589.6	-0.0303293	0.087652	-0.346019	0.729328	0.868504
Amt	534.567	-0.134943	0.090867	-1.48506	0.137527	0.371056
Amy1	1219.04	-0.0336928	0.186114	-0.181033	0.856342	0.932094
Amz1	419.318	-0.357289	0.138101	-2.58717	0.00967689	0.0798709
Amz2	1540.09	0.00560146	0.0797126	0.0702707	0.943978	0.976379
Anapc1	5075.65	0.0145108	0.0597849	0.242716	0.808225	0.910443
Anapc10	1211.73	0.0718847	0.136336	0.52726	0.598013	0.788653
Anapc11	747.141	-0.14783	0.0880545	-1.67884	0.0931828	0.300584
Anapc13	566.857	-0.140058	0.143999	-0.972627	0.330739	0.584897
Anapc15	626.209	-0.069474	0.106332	-0.653367	0.51352	0.733029
Anapc16	1037.03	-0.0430582	0.0746637	-0.576695	0.564146	0.767047
Anapc2	1184.93	0.0649343	0.0904304	0.718058	0.472722	0.702165
Anapc4	2451.49	0.0662585	0.0538425	1.2306	0.218473	0.475474
Anapc5	4784.01	-0.163647	0.0869482	-1.88212	0.0598199	0.23659
Anapc7	1035.06	-0.175708	0.0852672	-2.06068	0.039334	0.186633
Angel1	206.726	-0.108387	0.151729	-0.714346	0.475013	0.70385
Angel2	2065.25	0.0211767	0.0666989	0.317497	0.750867	0.879415
Angpt1	413.336	-0.170084	0.331192	-0.513552	0.607566	0.794061
Angptl2	91.4846	-0.0915437	0.191052	-0.479157	0.631827	0.809399
Angptl4	40.9682	0.483962	0.279071	1.73419	0.082884	0.284239
Angptl6	144.058	-0.0531737	0.156666	-0.339408	0.734303	0.871274
Ank	8510.05	-0.173923	0.0814103	-2.13638	0.0326484	0.166573
Ank1	2115.52	-0.251306	0.128784	-1.95137	0.0510127	0.217232
Ank2	64359.7	-0.0977247	0.107647	-0.907829	0.363969	0.612564
Ank3	36476.4	-0.151034	0.11152	-1.35432	0.175635	0.421273
Ankef1	100.502	-0.640192	0.24456	-2.61773	0.00885175	0.075927
Ankfy1	3664.42	-0.122972	0.0599606	-2.05088	0.0402782	0.18866
Ankhd1	5477.48	0.00897743	0.0860579	0.104319	0.916917	0.962142
Ankib1	5402.01	0.0231533	0.0788572	0.293611	0.769055	0.889258
Ankle2	1986.89	0.104282	0.108259	0.963263	0.335416	0.588591
Ankmy2	1832.7	-0.144994	0.0636467	-2.2781	0.0227204	0.135808
Ankra2	958.766	-0.00331974	0.0705024	-0.0470869	0.962444	0.984828
Ankrd10	2506	-0.0157982	0.0752981	-0.209809	0.833817	0.921896
Ankrd11	8948.73	-0.168899	0.0542253	-3.11476	0.00184094	0.0284301
Ankrd12	11168.4	-0.121103	0.0845122	-1.43297	0.151866	0.389818
Ankrd13a	1026.16	-0.00460063	0.0744609	-0.0617859	0.950733	0.979015
Ankrd13b	1032.94	0.0668882	0.088917	0.752254	0.451898	0.686667
Ankrd13c	3736.82	0.211363	0.120297	1.75702	0.078915	0.276288
Ankrd13d	1434.19	-0.212525	0.0739349	-2.87449	0.00404685	0.0466189
Ankrd16	1094.55	-0.376887	0.0841839	-4.47695	7.57164e-06	0.000569158
Ankrd17	13371.3	0.123193	0.0678104	1.81673	0.0692588	0.256423
Ankrd24	736.961	-0.345646	0.12543	-2.75569	0.00585691	0.0587254
Ankrd26	1342.52	0.0854057	0.091747	0.930883	0.351914	0.602955
Ankrd27	1465.89	-0.19507	0.081428	-2.39562	0.0165923	0.11088
Ankrd28	5853.28	-0.0452291	0.110428	-0.409581	0.682113	0.838396
Ankrd29	824.062	0.201012	0.112408	1.78823	0.0737382	0.266795
Ankrd33b	6420.08	0.0769843	0.0732395	1.05113	0.293199	0.553002
Ankrd34a	788.464	0.0853094	0.114251	0.746684	0.455254	0.689104
Ankrd34b	694.903	0.172443	0.111215	1.55053	0.121014	0.346716
Ankrd34c	773.519	-0.310729	0.083288	-3.73078	0.000190887	0.00638158
Ankrd35	380.192	0.0254088	0.12984	0.195694	0.84485	0.926906
Ankrd37	179.858	0.0565883	0.153391	0.368916	0.712191	0.857804
Ankrd39	91.3558	-0.158643	0.225968	-0.702058	0.482643	0.709936
Ankrd40	3078.45	0.0963112	0.0673132	1.43079	0.15249	0.39053
Ankrd42	1302.63	0.0157419	0.0915434	0.171961	0.863468	0.936317
Ankrd44	1376.37	-0.125015	0.140972	-0.886808	0.375182	0.621944
Ankrd45	2554.28	0.108925	0.101587	1.07223	0.283615	0.544616
Ankrd46	3567.53	0.108366	0.0787581	1.37593	0.168843	0.412398
Ankrd49	257.227	0.246875	0.15384	1.60475	0.108548	0.325355
Ankrd50	2523.35	0.182012	0.0972432	1.87172	0.0612456	0.239489
Ankrd52	1823.94	0.0520145	0.101858	0.510657	0.609592	0.795481
Ankrd54	236.323	0.143754	0.136944	1.04973	0.293843	0.553629
Ankrd55	196.997	-0.0368275	0.146547	-0.251301	0.801581	0.906704
Ankrd6	1488.69	-0.120201	0.170845	-0.703565	0.481704	0.7094
Ankrd63	571.31	-0.239786	0.200719	-1.19464	0.232229	0.490826
Ankrd9	199.713	0.109808	0.180588	0.608059	0.543148	0.754978
Anks1	1685.61	-0.326596	0.0846703	-3.85727	0.00011466	0.00461731
Anks1b	41611.6	-0.262304	0.129388	-2.02728	0.0426342	0.195276
Anks3	1829.04	-0.219154	0.0612759	-3.57651	0.000348207	0.00926782
Anks6	526.211	-0.269837	0.0960885	-2.80821	0.00498178	0.0529923
Ankub1	103.391	-0.173278	0.223742	-0.774453	0.438663	0.677369
Ankzf1	645.368	-0.0469199	0.102177	-0.459201	0.64609	0.81824
Anln	919.148	0.268499	0.0875819	3.06569	0.00217171	0.0314669
Ano1	122.102	-0.525621	0.25649	-2.04928	0.0404345	0.189249
Ano10	1109.45	-0.407053	0.0968538	-4.20276	2.63682e-05	0.00150712
Ano2	246.564	-0.956236	0.228047	-4.19314	2.75115e-05	0.00155811
Ano3	15625.6	0.0609132	0.0969876	0.628051	0.52997	0.74501
Ano4	5751.83	-0.400769	0.322384	-1.24314	0.213815	0.468625
Ano5	140.156	-0.376986	0.154777	-2.43568	0.0148639	0.105351
Ano6	1915.32	-0.4018	0.14365	-2.79707	0.0051568	0.053929
Ano8	1251.83	-0.141834	0.155293	-0.913334	0.361067	0.610246
Anp32a	5928.85	-0.0827996	0.0733087	-1.12946	0.258702	0.519661
Anp32b	807.764	-0.115018	0.0726164	-1.58391	0.113214	0.333317
Anp32e	3143.69	0.128506	0.0951319	1.35082	0.176755	0.422695
Anpep	88.772	0.044392	0.230314	0.192745	0.847158	0.928439
Antxr1	1313.34	-0.373336	0.0808701	-4.61649	3.90293e-06	0.000353343
Antxr2	166.769	-0.0107125	0.205816	-0.052049	0.95849	0.982573
Anxa1	55.9398	0.295877	0.323393	0.914915	0.360236	0.609468
Anxa11	588.621	0.12103	0.152708	0.792557	0.428036	0.669053
Anxa2	243.41	0.195944	0.183755	1.06633	0.286273	0.546674
Anxa3	346.663	0.033381	0.106823	0.312489	0.754669	0.881768
Anxa4	128.469	0.208455	0.213994	0.974119	0.329998	0.584375
Anxa5	1470.6	-0.0635076	0.120776	-0.525828	0.599007	0.788783
Anxa6	3000.27	-0.0678296	0.0943006	-0.719292	0.471961	0.701845
Anxa7	2585.99	-0.127346	0.0813507	-1.56539	0.11749	0.340944
Aoc2	84.5559	-0.0245834	0.207736	-0.11834	0.905798	0.95613
Aox1	332.523	-0.369869	0.130168	-2.84147	0.00449056	0.0494826
Aox3	138.003	-0.168458	0.173026	-0.973597	0.330257	0.584583
Aox4	69.1787	0.120603	0.242579	0.497168	0.619071	0.801712
Ap1ar	2642.42	0.0182596	0.0841788	0.216914	0.828275	0.919211
Ap1b1	4910.12	-0.15301	0.124235	-1.23162	0.218092	0.475098
Ap1g1	5355.42	0.108092	0.0637782	1.6948	0.0901124	0.295757
Ap1g2	83.9306	-0.0897928	0.230601	-0.389386	0.696991	0.848609
Ap1m1	1305.82	-0.23719	0.158659	-1.49496	0.134924	0.367724
Ap1m2	39.0137	0.699939	0.395653	1.76907	0.0768821	0.27243
Ap1s1	3275.63	-0.0252245	0.114889	-0.219555	0.826218	0.918126
Ap1s2	971.749	0.202887	0.128215	1.5824	0.113559	0.334079
Ap1s3	169.227	-0.123929	0.227923	-0.54373	0.586627	0.781771
Ap2a1	5248.65	-0.0857877	0.150117	-0.571471	0.56768	0.769081
Ap2a2	8211.34	-0.167278	0.134209	-1.24639	0.21262	0.467125
Ap2b1	12674.2	0.0445249	0.100699	0.442158	0.658375	0.825665
Ap2m1	9536.52	-0.0052917	0.115388	-0.0458602	0.963422	0.985121
Ap2s1	2382.69	-0.108979	0.146874	-0.741989	0.458094	0.69163
Ap3b1	3750.85	-0.11201	0.0705157	-1.58844	0.112187	0.331614
Ap3b2	4643.25	-0.22682	0.116358	-1.94933	0.0512561	0.217641
Ap3d1	5327.71	-0.311983	0.145919	-2.13805	0.0325126	0.166359
Ap3m1	1905.93	0.136197	0.0862554	1.579	0.114337	0.335736
Ap3m2	4246.73	-0.0332043	0.0558275	-0.594766	0.552	0.76081
Ap3s1	2784.68	0.213261	0.145921	1.46148	0.143883	0.378433
Ap3s2	2120.21	-0.0787136	0.0665885	-1.18209	0.23717	0.496141
Ap4e1	1257.43	-0.165206	0.113174	-1.45976	0.144357	0.378934
Ap4m1	562.397	-0.0139004	0.0913532	-0.152161	0.87906	0.943754
Ap4s1	1706.26	-0.35943	0.121744	-2.95234	0.0031538	0.040368
Ap5b1	65.0912	0.196156	0.310737	0.631261	0.52787	0.743465
Ap5m1	1219.99	0.137907	0.0852323	1.61801	0.105661	0.32071
Ap5s1	240.006	0.277704	0.154954	1.79217	0.0731053	0.265097
Ap5z1	433.923	-0.0211914	0.095713	-0.221406	0.824776	0.917243
Apaf1	660.051	0.0846409	0.131501	0.643652	0.519801	0.738415
Apba1	8554.74	-0.195256	0.105181	-1.85639	0.0633986	0.243447
Apba2	12557	-0.288418	0.107517	-2.68252	0.00730688	0.0682434
Apba3	275.531	-0.0805488	0.209505	-0.384473	0.700628	0.850283
Apbb1	8853.27	-0.100921	0.12585	-0.801913	0.422603	0.664485
Apbb1ip	310.039	-0.110201	0.160779	-0.685419	0.49308	0.71738
Apbb2	6308.32	-0.214398	0.0555163	-3.8619	0.00011251	0.00456035
Apc	26722.2	0.0777367	0.137809	0.56409	0.572693	0.772329
Apc2	3256.64	-0.0792535	0.135268	-0.585901	0.557942	0.76347
Apcdd1	448.244	-0.390902	0.162334	-2.40801	0.0160399	0.109249
Apeh	259.096	-0.239007	0.166126	-1.43872	0.150231	0.38811
Apex1	811.392	0.0964638	0.0900188	1.0716	0.283902	0.544998
Apex2	2484.45	-0.148537	0.129006	-1.15139	0.249572	0.510678
Aph1a	577.341	-0.00853183	0.100516	-0.0848805	0.932356	0.970136
Aph1b	1067.49	0.290609	0.0961667	3.02194	0.00251164	0.0348148
Aph1c	375.665	-0.269507	0.138646	-1.94385	0.0519135	0.219141
Api5	3354.2	0.18885	0.0828255	2.28009	0.0226021	0.135471
Apip	575.34	0.180134	0.0797407	2.25899	0.0238838	0.140382
Apitd1	56.0287	-0.105748	0.228731	-0.462325	0.643848	0.817197
Aplf	359.298	-0.159881	0.0997202	-1.60329	0.10887	0.325937
Apln	741.456	0.540197	0.123354	4.37925	1.19089e-05	0.000819002
Aplp1	11939.4	0.0587952	0.108755	0.540622	0.588768	0.783096
Aplp2	16594.3	-0.105421	0.121513	-0.867569	0.38563	0.630832
Apmap	1630.56	0.115024	0.079922	1.43921	0.150092	0.387831
Apoa1bp	680.331	0.00806577	0.146974	0.0548787	0.956235	0.98133
Apobec1	83.3512	-0.280166	0.194319	-1.44178	0.149364	0.386845
Apobec3	80.0285	-0.169998	0.226221	-0.751469	0.452371	0.686667
Apod	2728.35	-0.0794381	0.105647	-0.751923	0.452098	0.686667
Apoe	17830.2	-0.156658	0.136127	-1.15082	0.249806	0.510869
Apol8	144.072	-0.00455266	0.232681	-0.0195661	0.98439	0.994492
Apold1	130.729	0.307363	0.306948	1.00135	0.316657	0.574852
Apoo	1256.94	0.101988	0.109704	0.929661	0.352547	0.603372
Apool	340.242	0.309651	0.205644	1.50576	0.132128	0.363931
Apopt1	840.921	-0.256225	0.0805263	-3.18188	0.00146324	0.0246849
App	41162.7	-0.049692	0.126549	-0.392672	0.694562	0.84659
Appbp2	5081.82	0.0907878	0.0733955	1.23697	0.216099	0.472456
Appl1	6210.7	0.192831	0.113021	1.70614	0.0879815	0.292478
Appl2	3142.34	-0.286011	0.0584129	-4.89636	9.76265e-07	0.000122309
Aprt	323.282	-0.0192652	0.136709	-0.140921	0.887932	0.947592
Aptx	1073.37	-0.161626	0.071861	-2.24915	0.0245031	0.142281
Aqp11	352.904	0.112888	0.0945331	1.19416	0.232413	0.490826
Aqp4	2985.16	0.312268	0.120702	2.5871	0.00967878	0.0798709
Aqr	2534.31	-0.0255541	0.0597062	-0.427997	0.668654	0.830327
Ar	1957.35	0.205047	0.0705411	2.90678	0.00365175	0.0442236
Araf	4216.44	0.0209043	0.0712183	0.293524	0.769122	0.889258
Arap1	489.826	-0.469398	0.111639	-4.2046	2.61539e-05	0.00150179
Arap2	10278.3	0.0986425	0.100802	0.978573	0.327791	0.582935
Arap3	157.867	-0.177571	0.156538	-1.13436	0.256642	0.517919
Arc	2167.14	1.31139	0.50292	2.60755	0.00911919	0.0774694
Arcn1	4029.25	0.182407	0.0686331	2.65771	0.00786743	0.0713302
Arel1	5674.18	0.0487908	0.0941685	0.518123	0.604373	0.792179
Arf1	8399.99	0.0748373	0.0606775	1.23336	0.217441	0.474309
Arf2	1520.39	-0.0689932	0.0730126	-0.944949	0.344685	0.597473
Arf3	18859.5	-0.0789171	0.128075	-0.61618	0.537776	0.749954
Arf4	2622.23	0.153333	0.100934	1.51914	0.128726	0.358832
Arf5	1287.22	0.282452	0.0843724	3.34768	0.000814913	0.0164884
Arf6	1764.72	0.411487	0.150954	2.72592	0.00641232	0.0624448
Arfgap1	2594.97	-0.17307	0.110556	-1.56544	0.117479	0.340944
Arfgap2	1555.7	-0.0356711	0.0835242	-0.427075	0.669325	0.830745
Arfgap3	693.423	-0.0735012	0.0907352	-0.810062	0.417905	0.659701
Arfgef1	7875.56	0.097561	0.080862	1.20651	0.22762	0.486251
Arfgef2	4372.62	-0.149029	0.0697494	-2.13663	0.0326283	0.166538
Arfgef3	9116.53	-0.100375	0.0722005	-1.39023	0.164458	0.406056
Arfip1	93.9283	0.0653501	0.179224	0.364628	0.715389	0.85943
Arfip2	1779	0.125621	0.0654411	1.9196	0.0549085	0.226082
Arfrp1	786.623	-0.180227	0.0897472	-2.00817	0.0446255	0.200782
Arg2	126.75	-0.368686	0.239357	-1.54032	0.123482	0.350208
Arglu1	4933.21	-0.068753	0.100189	-0.686232	0.492567	0.717055
Arhgap1	1978.5	-0.13904	0.102378	-1.35811	0.174429	0.42025
Arhgap10	3770.12	-0.312824	0.107305	-2.91528	0.00355365	0.0436828
Arhgap11a	99.3059	-0.192155	0.221029	-0.869363	0.384649	0.630058
Arhgap12	2243.05	-0.0542266	0.0759238	-0.714224	0.475089	0.70385
Arhgap15	2201.74	0.183045	0.0873946	2.09447	0.0362185	0.177698
Arhgap17	1367.68	-0.371669	0.108028	-3.44047	0.0005807	0.0132155
Arhgap18	917.095	-0.153034	0.085428	-1.79138	0.0732321	0.265352
Arhgap19	201.502	-0.186918	0.134058	-1.39431	0.163223	0.40528
Arhgap20	6906.74	0.033869	0.0751221	0.450853	0.652095	0.822424
Arhgap21	8123.09	-0.026695	0.0775463	-0.344246	0.730661	0.868877
Arhgap22	733.549	-0.76119	0.299275	-2.54344	0.0109766	0.0871031
Arhgap23	3052.2	-0.155399	0.0594686	-2.61312	0.00897199	0.0765334
Arhgap24	427.872	-0.112577	0.136813	-0.822849	0.410594	0.652907
Arhgap25	750.718	0.249555	0.0872612	2.85986	0.00423831	0.0476626
Arhgap26	14975.2	0.0150047	0.102256	0.146736	0.88334	0.945575
Arhgap27	313.297	-0.366795	0.163222	-2.24721	0.0246266	0.142718
Arhgap29	1460.64	0.108762	0.122383	0.888702	0.374163	0.620981
Arhgap30	132.509	-0.103196	0.162806	-0.63386	0.526172	0.742278
Arhgap31	1209.83	0.126469	0.145901	0.866814	0.386044	0.631259
Arhgap32	24296.5	-0.0411747	0.0617901	-0.666364	0.505179	0.727139
Arhgap33	1406.75	-0.0911336	0.0922371	-0.988036	0.323135	0.579587
Arhgap35	11572.7	-0.0564466	0.0879288	-0.641958	0.520901	0.739214
Arhgap39	3540.22	-0.260419	0.0838548	-3.1056	0.00189895	0.0290774
Arhgap4	122.927	0.155308	0.226128	0.686812	0.492201	0.716771
Arhgap42	2476.7	-0.236753	0.133732	-1.77036	0.0766669	0.272033
Arhgap44	6403.49	-0.169301	0.104771	-1.61592	0.106112	0.32116
Arhgap5	8747.84	0.251128	0.133993	1.87419	0.0609043	0.238521
Arhgap6	624.797	-0.402994	0.16292	-2.47357	0.0133772	0.0982748
Arhgdia	3087.94	-0.0653037	0.111486	-0.585758	0.558038	0.76347
Arhgdib	209.598	-0.275171	0.209695	-1.31225	0.189437	0.439092
Arhgdig	747.521	-0.10667	0.16823	-0.63407	0.526035	0.742184
Arhgef1	704.352	-0.247966	0.13154	-1.8851	0.0594166	0.235671
Arhgef10	1445	-0.125224	0.0993283	-1.26071	0.207413	0.462328
Arhgef10l	1561.08	-0.310995	0.0765366	-4.06335	4.83737e-05	0.00236826
Arhgef11	4413.12	-0.019161	0.0865282	-0.221443	0.824748	0.917243
Arhgef12	14292.4	-0.00524214	0.0560364	-0.0935488	0.925468	0.966291
Arhgef15	442.311	-0.199815	0.135167	-1.47828	0.139332	0.373029
Arhgef17	5243.75	-0.0586225	0.116786	-0.501964	0.615693	0.799292
Arhgef18	1887.77	0.00120864	0.0929955	0.0129967	0.98963	0.996408
Arhgef19	134.199	0.0279067	0.175666	0.158862	0.873777	0.94067
Arhgef2	4541.57	-0.117204	0.0897253	-1.30625	0.191467	0.441651
Arhgef25	3253.2	-0.0499925	0.0749726	-0.66681	0.504894	0.727063
Arhgef26	993.043	-0.014256	0.105987	-0.134507	0.893002	0.949743
Arhgef28	1972.66	-0.170943	0.114632	-1.49124	0.135899	0.368993
Arhgef3	3288.11	0.0489857	0.0808222	0.606092	0.544454	0.755745
Arhgef33	150.067	-0.774874	0.191636	-4.04346	5.26678e-05	0.00251246
Arhgef37	1538.73	-0.278128	0.378835	-0.734167	0.462847	0.694915
Arhgef4	5058.49	-0.0592925	0.124447	-0.476448	0.633755	0.810706
Arhgef40	372.08	-0.109137	0.142318	-0.766855	0.443168	0.679577
Arhgef5	101.623	-0.0798154	0.191405	-0.416997	0.676681	0.83561
Arhgef6	550.182	-0.262515	0.138489	-1.89556	0.0580184	0.232879
Arhgef7	4969.13	-0.0851325	0.11726	-0.726016	0.467829	0.698589
Arhgef9	19033.4	0.0204456	0.0677518	0.301772	0.762826	0.88614
Arid1a	4160.15	-0.20357	0.0971256	-2.09595	0.0360869	0.177262
Arid1b	8133.14	-0.289029	0.113951	-2.53644	0.0111986	0.0880125
Arid2	3078.56	-0.0316537	0.0921186	-0.343619	0.731133	0.869188
Arid3a	300.851	-0.134524	0.141099	-0.9534	0.340388	0.593694
Arid3b	448.978	-0.138715	0.0997154	-1.39111	0.164193	0.405894
Arid4a	2836.85	0.0489622	0.0701784	0.697682	0.485376	0.711624
Arid4b	5116.87	0.033835	0.124168	0.272493	0.785243	0.897758
Arid5a	164.373	0.0317123	0.191544	0.165561	0.868502	0.938908
Arid5b	2865.71	-0.0731818	0.0608045	-1.20356	0.22876	0.487268
Arih1	7169.67	0.0633523	0.0834355	0.759296	0.447675	0.682883
Arih2	2312.67	-0.135594	0.0786649	-1.7237	0.0847626	0.286851
Arl1	4059.15	0.276517	0.117403	2.35528	0.0185087	0.119564
Arl10	159.055	-0.0318239	0.174535	-0.182335	0.85532	0.931308
Arl13b	1062.61	0.0382302	0.10986	0.347989	0.727848	0.867612
Arl14ep	1499.2	0.199576	0.146065	1.36636	0.171827	0.416327
Arl15	6378.54	-0.0171376	0.105369	-0.162644	0.870798	0.939992
Arl16	379.555	0.0740611	0.102821	0.720295	0.471344	0.701725
Arl2	862.567	-0.402221	0.151172	-2.66069	0.00779803	0.0710306
Arl2bp	2663.47	0.105106	0.0620544	1.69378	0.0903076	0.296241
Arl3	2216.39	-0.112423	0.10982	-1.0237	0.305978	0.56457
Arl4a	1659.9	0.0360388	0.135733	0.265513	0.790614	0.900204
Arl4c	1161	0.121607	0.0762715	1.5944	0.110847	0.329333
Arl4d	311.026	0.388003	0.22173	1.74988	0.0801382	0.278497
Arl5a	3709.21	0.267076	0.0929157	2.87439	0.0040481	0.0466189
Arl5b	1343.96	0.457087	0.109162	4.18722	2.82396e-05	0.00158043
Arl5c	54.1506	-0.614335	0.265352	-2.31517	0.0206035	0.127263
Arl6	923.289	0.279406	0.143586	1.94591	0.0516651	0.218555
Arl6ip1	6949.74	0.0704292	0.0773694	0.910299	0.362665	0.611966
Arl6ip4	668.083	-0.357483	0.18001	-1.98591	0.0470434	0.207709
Arl6ip5	2570.66	0.261706	0.0899971	2.90794	0.00363813	0.0441957
Arl6ip6	506.867	0.307526	0.205365	1.49746	0.134274	0.366696
Arl8a	2350.77	0.0100917	0.0957888	0.105354	0.916095	0.961767
Arl8b	6631.75	0.138753	0.0721915	1.92201	0.0546049	0.225379
Armc1	2722.07	0.183866	0.0894582	2.05532	0.0398477	0.187493
Armc10	585.513	0.0207297	0.100602	0.206055	0.836748	0.923232
Armc2	595.876	-0.0532244	0.0804627	-0.661479	0.508305	0.730099
Armc4	94.0382	-0.450124	0.193881	-2.32165	0.0202519	0.12614
Armc5	174.286	-0.155079	0.164515	-0.942648	0.345861	0.598132
Armc6	623.537	0.102803	0.0968857	1.06107	0.288656	0.549027
Armc7	253.491	-0.0888505	0.147594	-0.601992	0.547179	0.757404
Armc8	4719.59	-0.0999718	0.090317	-1.1069	0.268338	0.529967
Armc9	2469.87	-0.210904	0.0514993	-4.09528	4.21652e-05	0.00215216
Armcx1	2569.48	0.127066	0.0706945	1.7974	0.0722729	0.263609
Armcx2	1927.09	0.128156	0.0747727	1.71394	0.0865393	0.289937
Armcx3	2238.49	0.194045	0.0799993	2.42558	0.015284	0.106386
Armcx4	3142.07	-0.0790132	0.0900543	-0.877395	0.380272	0.625948
Armcx6	70.3629	-0.0362882	0.217459	-0.166874	0.867469	0.938605
Armt1	658.13	0.0958931	0.0865266	1.10825	0.267754	0.52932
Arnt	2909.76	-0.148785	0.075681	-1.96595	0.0493041	0.213837
Arnt2	13098.5	-0.23471	0.103876	-2.25951	0.0238515	0.140271
Arntl	2549.38	-0.0407598	0.0772226	-0.527822	0.597623	0.788653
Arntl2	813.028	-0.131353	0.080136	-1.63913	0.101187	0.313755
Arpc1a	3369.83	0.0725888	0.0733335	0.989844	0.32225	0.578547
Arpc1b	335.637	0.131184	0.110482	1.18738	0.235079	0.49385
Arpc2	4072.33	0.184437	0.0710678	2.59523	0.00945283	0.0792599
Arpc3	4086.27	0.0272255	0.129137	0.210827	0.833022	0.921773
Arpc4	2797.68	0.168484	0.0673663	2.50101	0.0123839	0.0937143
Arpc5	2065.46	0.20923	0.0745362	2.80709	0.00499915	0.0530234
Arpc5l	2098.7	0.169243	0.0768329	2.20274	0.0276133	0.152284
Arpin	454.051	-0.190363	0.0982971	-1.93661	0.0527932	0.220709
Arpp19	15185.4	0.103399	0.0946423	1.09252	0.274605	0.536619
Arpp21	38516	-0.235712	0.100533	-2.34463	0.0190461	0.121705
Arr3	57.4559	-0.734429	0.229339	-3.20237	0.00136304	0.0237441
Arrb1	12712.6	0.0639633	0.0963302	0.664001	0.50669	0.728776
Arrb2	840.195	-0.0921336	0.10894	-0.845728	0.397704	0.640947
Arrdc1	228.356	-0.499681	0.132608	-3.76812	0.000164481	0.00574665
Arrdc2	191.082	0.237704	0.179611	1.32344	0.18569	0.433977
Arrdc3	2062.4	0.301248	0.113604	2.65174	0.00800771	0.0721275
Arrdc4	221.06	0.103528	0.153576	0.674118	0.500236	0.72297
Arsa	592.416	0.0800452	0.10742	0.745162	0.456174	0.690075
Arsg	869.294	-0.296206	0.10841	-2.73228	0.00628982	0.0618657
Arsj	160.485	0.0282833	0.204203	0.138506	0.889841	0.948142
Arsk	378.46	-0.0743621	0.131658	-0.564813	0.572201	0.771981
Art3	91.7262	-0.202615	0.176245	-1.14962	0.250299	0.511443
Arv1	413.466	-0.196099	0.0994781	-1.97128	0.0486924	0.212406
Arvcf	890.607	-0.168799	0.104378	-1.61719	0.105837	0.320717
Arx	248.4	-0.0736907	0.177649	-0.414812	0.67828	0.836695
Arxes1	270.64	0.330192	0.133746	2.46879	0.0135571	0.0990277
Arxes2	856.842	0.18101	0.122683	1.47543	0.140098	0.37441
As3mt	254.727	-0.0606554	0.129324	-0.469018	0.639057	0.814231
Asah1	2881.54	0.018143	0.0749956	0.24192	0.808842	0.910793
Asah2	709.282	-0.0753528	0.0937244	-0.803984	0.421407	0.663372
Asap1	14250.1	-0.224107	0.108122	-2.07271	0.0381988	0.18298
Asap2	1974.81	-0.0124894	0.0988335	-0.126368	0.89944	0.952995
Asap3	162.891	-0.422794	0.178078	-2.37421	0.0175868	0.115539
Asb1	1462.44	0.108881	0.0788665	1.38058	0.167409	0.410026
Asb11	260.193	-0.518799	0.124621	-4.16302	3.14064e-05	0.00167902
Asb13	1333.07	0.0829758	0.0718075	1.15553	0.247873	0.509846
Asb18	92.9229	0.128068	0.329807	0.388311	0.697786	0.849076
Asb2	103.573	-0.681795	0.234921	-2.90224	0.00370508	0.0445094
Asb3	2358.99	0.0161588	0.109401	0.147704	0.882577	0.945465
Asb5	200.706	-0.324757	0.224784	-1.44475	0.148527	0.385556
Asb6	546.836	-0.120547	0.10951	-1.10079	0.27099	0.533408
Asb7	1109.51	-0.00540754	0.0799093	-0.0676709	0.946048	0.97733
Asb8	1162.45	-0.0956957	0.103214	-0.927159	0.353844	0.603562
Ascc1	509.392	-0.299432	0.12106	-2.47342	0.0133827	0.0982748
Ascc2	1009.06	-0.22248	0.0791299	-2.81158	0.00492984	0.0526203
Ascc3	4328.4	0.190589	0.125125	1.5232	0.12771	0.357236
Ascl1	54.9808	0.126708	0.277219	0.45707	0.647621	0.819302
Asf1a	414.908	0.43287	0.163731	2.64378	0.00819856	0.0730227
Ash1l	12039.8	0.0860973	0.0666137	1.29249	0.196189	0.448185
Ash2l	1253.09	0.0391392	0.0884746	0.442378	0.658216	0.825622
Asic1	1782.67	-0.125688	0.0968367	-1.29793	0.19431	0.446053
Asic2	30741.8	-0.436642	0.331513	-1.31712	0.187799	0.437042
Asic4	460.428	0.0435928	0.320419	0.136049	0.891782	0.949157
Asl	249.377	-0.156359	0.144937	-1.07881	0.280674	0.54198
Asna1	1682.44	-0.248102	0.13273	-1.86923	0.0615914	0.239773
Asns	3220.67	-0.0381969	0.0664696	-0.574652	0.565526	0.767505
Aspa	1068.28	-0.154908	0.116557	-1.32903	0.183837	0.431147
Aspg	85.3955	0.141037	0.178752	0.789006	0.430109	0.671192
Asph	8206.68	-0.13019	0.0755828	-1.72249	0.0849813	0.2872
Asphd1	614.268	0.202867	0.0841884	2.40968	0.0159665	0.109049
Asphd2	1813.38	0.0566269	0.135677	0.417367	0.67641	0.835447
Aspn	47.3611	0.481839	0.297428	1.62002	0.105228	0.32071
Aspscr1	649.192	-0.176133	0.104586	-1.6841	0.0921625	0.298562
Asrgl1	4680.99	0.0271408	0.0688573	0.394161	0.693462	0.846057
Ass1	502.893	-0.601554	0.0856936	-7.01983	2.22143e-12	2.29603e-09
Aste1	386.751	0.0689919	0.123668	0.55788	0.576926	0.774921
Astn1	15992	-0.119965	0.111198	-1.07884	0.280658	0.54198
Astn2	11210	-0.218084	0.128885	-1.69209	0.0906293	0.296297
Asxl1	3145.47	-0.0885899	0.0701118	-1.26355	0.206391	0.461504
Asxl2	3287.58	-0.0211657	0.122792	-0.17237	0.863146	0.936211
Asxl3	1605.97	-0.072913	0.276657	-0.26355	0.792126	0.901518
Atad1	4747.62	0.278182	0.133623	2.08184	0.0373569	0.180553
Atad2	929.116	-0.0609864	0.115472	-0.52815	0.597395	0.788653
Atad2b	2440.65	-0.0471261	0.1278	-0.368749	0.712315	0.857804
Atad3a	908.551	-0.151514	0.0834429	-1.81578	0.0694042	0.256808
Atad5	375.23	-0.106581	0.172469	-0.617973	0.536593	0.749357
Atat1	630.485	-0.244856	0.106306	-2.30331	0.0212614	0.129918
Atcay	6136.66	0.0533482	0.0877337	0.608069	0.543142	0.754978
Atf1	985.307	-0.299228	0.0883853	-3.38549	0.000710518	0.0149889
Atf2	6579.18	0.121611	0.0845964	1.43755	0.150562	0.388642
Atf4	2747.9	0.0728839	0.0825998	0.882374	0.377575	0.62405
Atf5	250.817	-0.105094	0.132283	-0.794462	0.426926	0.668341
Atf6	6975.37	0.096105	0.0783851	1.22606	0.220175	0.477309
Atf6b	885.375	0.183352	0.0716252	2.55988	0.0104708	0.0844406
Atf7	50.0057	-0.157652	0.251553	-0.626716	0.530846	0.745439
Atf7ip	4748.36	0.0436403	0.0741146	0.588822	0.555981	0.762492
Atg10	1503.71	-0.268544	0.135083	-1.988	0.0468118	0.207359
Atg101	665.627	0.115167	0.142879	0.806042	0.420218	0.662089
Atg12	1939.53	0.271049	0.0941106	2.88012	0.0039753	0.0462271
Atg13	1846.58	0.0387455	0.0703353	0.550868	0.581724	0.778583
Atg14	991.081	0.0380283	0.0822291	0.462468	0.643746	0.817156
Atg16l1	2737.59	-0.0796126	0.0598336	-1.33057	0.183331	0.430647
Atg16l2	828.102	-0.344065	0.0905802	-3.79846	0.000145597	0.00547222
Atg2a	931.78	0.0209684	0.110733	0.18936	0.849811	0.92874
Atg2b	4315.26	-0.0232929	0.0678341	-0.343381	0.731312	0.869268
Atg3	1942.65	0.0397617	0.0691623	0.574903	0.565357	0.767442
Atg4a	474.444	-0.103236	0.10659	-0.968535	0.332777	0.586716
Atg4b	1680.7	0.0427496	0.0772556	0.553352	0.580022	0.777395
Atg4c	3132.63	-0.10424	0.0712479	-1.46305	0.143452	0.377758
Atg4d	474.767	-0.0687812	0.125444	-0.548303	0.583484	0.779435
Atg5	1293.48	0.0800505	0.0872154	0.917849	0.358698	0.607739
Atg7	1155.68	-0.27408	0.0776123	-3.5314	0.000413373	0.0104452
Atg9a	1945.78	-0.0629914	0.161335	-0.390439	0.696212	0.848077
Atg9b	66.7728	0.194707	0.221125	0.880527	0.378574	0.624614
Athl1	104.114	-0.2999	0.205276	-1.46096	0.144026	0.378545
Atic	806.037	-0.140871	0.0930013	-1.51472	0.129844	0.360604
Atl1	4758.13	-0.0405249	0.057365	-0.70644	0.479914	0.707474
Atl2	2791.12	0.123889	0.0702369	1.76387	0.0777543	0.274051
Atl3	2237.74	0.0838766	0.132618	0.632467	0.527082	0.743068
Atm	1920.51	0.0907684	0.0908511	0.99909	0.317751	0.575591
Atmin	2628.18	0.00741242	0.125799	0.0589227	0.953014	0.980048
Atoh8	38.0917	-0.110528	0.274087	-0.403258	0.686758	0.841517
Atox1	896.686	0.160018	0.0836831	1.91219	0.0558516	0.228246
Atp10a	827.822	-0.175896	0.16563	-1.06198	0.288245	0.548711
Atp10b	67.9127	-0.136294	0.210176	-0.648475	0.516678	0.736001
Atp11a	2745.46	-0.282546	0.098107	-2.87998	0.00397701	0.0462271
Atp11b	4626.08	-0.0857302	0.132129	-0.648836	0.516444	0.735921
Atp11c	1498.57	0.0582239	0.141561	0.4113	0.680853	0.837742
Atp13a1	1172.87	-0.169392	0.111872	-1.51416	0.129985	0.360734
Atp13a2	2129.93	0.0540674	0.1568	0.344817	0.730232	0.868733
Atp13a3	4519.8	0.11067	0.0919381	1.20374	0.22869	0.487268
Atp13a4	450.468	-0.201607	0.133185	-1.51373	0.130094	0.360734
Atp13a5	807.958	-0.312925	0.0963072	-3.24924	0.00115715	0.0208218
Atp1a1	27627.5	0.125436	0.137215	0.914154	0.360636	0.609712
Atp1a2	29937.6	0.0126216	0.100323	0.125809	0.899883	0.95322
Atp1a3	28715.4	0.0187525	0.185079	0.101322	0.919295	0.963076
Atp1b1	34647.9	0.0896605	0.0786783	1.13958	0.25446	0.515978
Atp1b2	2969.8	0.122398	0.112535	1.08764	0.276753	0.53802
Atp1b3	4629.98	0.0939687	0.0744299	1.26251	0.206765	0.461847
Atp2a2	33376.3	0.127896	0.108941	1.17399	0.240398	0.500172
Atp2a3	113.248	-0.0736142	0.216224	-0.340453	0.733516	0.870769
Atp2b1	47278	0.1386	0.0816659	1.69716	0.0896664	0.295294
Atp2b2	41040	0.0523777	0.116925	0.447959	0.654183	0.823656
Atp2b3	4492.38	-0.165957	0.126109	-1.31599	0.188179	0.437151
Atp2b4	8253.65	-0.00468633	0.0893293	-0.0524613	0.958161	0.98248
Atp2c1	9610.6	0.0716434	0.0722273	0.991915	0.321239	0.578193
Atp5a1	19704.2	-0.0124562	0.105925	-0.117595	0.906389	0.956354
Atp5b	22010.6	-0.0331564	0.131889	-0.251395	0.801509	0.906704
Atp5c1	7198.41	0.147348	0.0595113	2.47597	0.0132876	0.0978074
Atp5d	2730.43	0.0954992	0.159706	0.597968	0.549861	0.759627
Atp5e	2600.28	0.0778843	0.0649387	1.19935	0.230392	0.488971
Atp5f1	7117.38	0.101546	0.0655932	1.54812	0.121593	0.347559
Atp5g1	3096.04	0.0313388	0.116441	0.26914	0.787822	0.898846
Atp5g2	1027.7	-0.00127435	0.0836736	-0.01523	0.987849	0.995747
Atp5g3	4736.76	0.0902535	0.0891698	1.01215	0.311465	0.570874
Atp5h	5094.95	0.079562	0.0749226	1.06192	0.288271	0.548711
Atp5j	3399.7	-0.0130708	0.0746019	-0.175208	0.860916	0.934776
Atp5j2	3693.66	0.111977	0.0817946	1.369	0.170998	0.415127
Atp5k	5334.54	-0.005719	0.0893094	-0.0640358	0.948942	0.978283
Atp5l	3427.36	-0.166211	0.127355	-1.3051	0.191859	0.442108
Atp5o	4467.86	-0.0969537	0.137303	-0.70613	0.480107	0.707638
Atp5s	597.241	0.0083322	0.0987828	0.0843486	0.932779	0.970213
Atp5sl	652.94	-0.0301807	0.0874938	-0.344947	0.730134	0.868733
Atp6ap1	8107.01	0.0111815	0.10495	0.106541	0.915153	0.961186
Atp6ap1l	480.137	-0.439858	0.13008	-3.38144	0.000721064	0.0151579
Atp6ap2	8767.36	0.188568	0.082467	2.28659	0.0222198	0.133978
Atp6v0a1	12145.3	0.0656238	0.0633712	1.03555	0.300414	0.559803
Atp6v0a2	1935.25	0.0808218	0.0811148	0.996388	0.319062	0.576449
Atp6v0a4	64.4624	-0.578499	0.220985	-2.61782	0.00884933	0.075927
Atp6v0b	3553.79	0.0362169	0.10758	0.336652	0.736379	0.872498
Atp6v0d1	4732.59	0.0672044	0.0668952	1.00462	0.315079	0.573874
Atp6v0e	1013.28	-0.153106	0.101373	-1.51033	0.13096	0.362365
Atp6v0e2	6568.78	-0.0760302	0.119593	-0.635742	0.524944	0.741565
Atp6v1a	18536.4	0.145807	0.0635314	2.29504	0.0217307	0.132185
Atp6v1b2	17584.8	0.0192528	0.0836897	0.23005	0.818053	0.914659
Atp6v1c1	8218.31	0.126444	0.069083	1.83032	0.0672028	0.252122
Atp6v1d	6847.6	0.105958	0.0709258	1.49393	0.135195	0.368128
Atp6v1e1	10506.3	0.12137	0.0867682	1.39878	0.161878	0.403476
Atp6v1f	1699.34	-0.0929307	0.117137	-0.793353	0.427572	0.668833
Atp6v1g1	2505.81	0.0188235	0.0786037	0.239474	0.810738	0.911483
Atp6v1g2	6616.22	0.0730793	0.0684712	1.0673	0.285837	0.546345
Atp6v1h	7465.61	0.147047	0.0866611	1.69681	0.0897335	0.295294
Atp7a	696.873	0.175248	0.103657	1.69065	0.0909042	0.296628
Atp7b	99.2954	-0.123803	0.21616	-0.572737	0.566823	0.768424
Atp8a1	19460.6	-0.0192244	0.0583385	-0.329532	0.741754	0.875071
Atp8a2	5394.62	-0.326645	0.109902	-2.97215	0.00295722	0.0390822
Atp8b1	616.225	-0.415062	0.138762	-2.99118	0.00277899	0.0372624
Atp8b2	3076.11	-0.159378	0.0796436	-2.00115	0.0453766	0.202813
Atp9a	9366.51	-0.200319	0.152495	-1.31361	0.188978	0.438438
Atp9b	6973.43	-0.162485	0.102493	-1.58532	0.112893	0.333204
Atpaf1	1884.57	-0.124287	0.0706582	-1.75898	0.0785805	0.275632
Atpaf2	712.48	0.0467303	0.0794382	0.58826	0.556358	0.762655
Atpif1	4016.05	0.00712224	0.0911857	0.078107	0.937743	0.973291
Atr	1684.61	0.033117	0.139531	0.237345	0.812389	0.911876
Atraid	1248.62	-0.0169256	0.0723763	-0.233856	0.815097	0.912779
Atrn	11725.1	0.0208125	0.0616788	0.337433	0.735791	0.872301
Atrnl1	17654.3	-0.234664	0.119929	-1.95669	0.0503837	0.216351
Atrx	16117.3	0.186946	0.106528	1.75489	0.0792775	0.276902
Atxn1	16188.4	-0.140036	0.0987331	-1.41832	0.156096	0.395469
Atxn10	6907.6	-0.18677	0.0816241	-2.28817	0.0221278	0.133683
Atxn1l	1681.7	0.0401895	0.0676936	0.593697	0.552715	0.761195
Atxn2	5136.18	-0.210626	0.0696188	-3.02542	0.00248285	0.0345233
Atxn2l	1771.67	-0.0846599	0.0841653	-1.00588	0.314475	0.573508
Atxn3	2148.25	0.0274762	0.11412	0.240766	0.809737	0.911358
Atxn7	2033.89	-0.196398	0.119723	-1.64044	0.100913	0.313611
Atxn7l1	3870.18	-0.364071	0.0933715	-3.89916	9.65259e-05	0.00400993
Atxn7l2	431.685	-0.191194	0.0947278	-2.01836	0.0435543	0.197732
Atxn7l3	4389.73	0.134393	0.0707037	1.90079	0.0573295	0.23182
Atxn7l3b	5334.55	0.345868	0.0795888	4.34569	1.38839e-05	0.000906329
Auh	2209.63	-0.233532	0.0830519	-2.81188	0.00492533	0.0526174
Aup1	802.16	0.161229	0.0973939	1.65543	0.0978369	0.308614
Aurkaip1	976.776	0.134854	0.0972474	1.38671	0.16553	0.407437
Auts2	27324.7	-0.39678	0.387271	-1.02455	0.305574	0.564161
Aven	653.796	-0.0700337	0.113057	-0.619456	0.535616	0.749005
Avl9	3403.48	0.154883	0.104512	1.48197	0.138349	0.372043
Avpi1	435.394	0.0782966	0.150516	0.520188	0.602933	0.791174
AW011738	56.5824	0.0300326	0.227204	0.132183	0.894839	0.951093
Axin1	1235.55	-0.218682	0.0914531	-2.3912	0.0167935	0.111684
Axin2	843.021	-0.00180575	0.0938595	-0.0192388	0.984651	0.994675
Axl	845.866	-0.0505777	0.0783395	-0.645622	0.518524	0.737445
Azi2	3174.83	0.295265	0.0778694	3.7918	0.000149557	0.00554696
Azin1	7452.67	0.363082	0.115955	3.13123	0.00174078	0.0275959
Azin2	966.496	-0.124716	0.122836	-1.01531	0.309958	0.569011
B2m	1939.91	0.19905	0.0824051	2.4155	0.0157136	0.107725
B3galnt1	1937.2	0.108975	0.0755872	1.44171	0.149383	0.386845
B3galnt2	1214.93	-0.17509	0.0811511	-2.15757	0.030961	0.161756
B3galt1	15547.9	-0.0301102	0.164242	-0.183328	0.854541	0.931149
B3galt2	2917.07	0.31553	0.095823	3.29285	0.000991787	0.0191085
B3galt4	67.745	0.0237632	0.201674	0.11783	0.906202	0.956239
B3galt5	1234.52	-0.114318	0.1004	-1.13862	0.254861	0.516172
B3galt6	276.036	0.0356512	0.149034	0.239215	0.810939	0.911483
B3gat1	4048.28	-0.0138024	0.0964149	-0.143157	0.886166	0.946694
B3gat2	357.582	0.0359935	0.13676	0.263187	0.792406	0.901671
B3gat3	2115.23	0.139003	0.103876	1.33817	0.180841	0.427233
B3glct	1344.21	-0.251062	0.0733199	-3.4242	0.000616607	0.0136655
B3gnt9	72.4137	0.0289121	0.208348	0.138768	0.889633	0.948112
B3gntl1	658.943	-0.434228	0.119821	-3.62398	0.000290108	0.00817774
B430305J03Rik	76.26	0.249325	0.234262	1.0643	0.287193	0.547755
B4galnt1	1492.82	0.107471	0.120561	0.891428	0.3727	0.619947
B4galnt3	90.0698	0.225728	0.217516	1.03775	0.299385	0.559038
B4galnt4	1732.36	-0.233992	0.120591	-1.94038	0.052334	0.219959
B4galt1	370.46	0.0234625	0.137871	0.170176	0.864871	0.937241
B4galt2	1514.51	0.0607707	0.098576	0.616486	0.537574	0.749954
B4galt3	660.824	0.0315472	0.0915484	0.344596	0.730398	0.868815
B4galt4	622.635	0.0743128	0.122369	0.607286	0.543661	0.755268
B4galt5	2139.87	-0.0938789	0.0791489	-1.1861	0.235581	0.494458
B4galt6	4815.33	0.153384	0.0904345	1.69608	0.0898706	0.29551
B4galt7	514.642	0.0442597	0.0984113	0.449742	0.652896	0.822787
B4gat1	2110.73	-0.0134666	0.109471	-0.123016	0.902095	0.954275
B9d1	445.508	-0.107769	0.0914998	-1.17781	0.238873	0.498328
B9d2	166.042	0.125293	0.160292	0.781656	0.434417	0.674183
Baalc	675.59	-0.0982576	0.129107	-0.761054	0.446625	0.682035
Babam1	1184.02	-0.0958054	0.12646	-0.757593	0.448695	0.683848
Bace1	2837.48	0.0822633	0.0769963	1.06841	0.285338	0.546146
Bace2	260.299	-0.803165	0.238529	-3.36716	0.00075948	0.0156475
Bach1	760.839	-0.0146045	0.104314	-0.140005	0.888656	0.947616
Bach2	2997.74	-0.191766	0.167884	-1.14225	0.253351	0.514739
Bad	577.468	0.00226208	0.0967093	0.0233905	0.981339	0.993477
Bag1	1601.29	0.128012	0.0825431	1.55085	0.120937	0.346576
Bag2	225.882	-0.0558352	0.167652	-0.333042	0.739102	0.873805
Bag3	105.346	0.0321344	0.16948	0.189606	0.849618	0.92874
Bag4	2748.72	0.181787	0.103593	1.75483	0.0792886	0.276902
Bag5	1307.62	0.0763243	0.104262	0.732043	0.464143	0.695772
Bag6	3256.79	0.0304716	0.0833041	0.365788	0.714523	0.859243
Bahcc1	461.793	-0.114273	0.118504	-0.9643	0.334896	0.588094
Bahd1	996.513	-0.000919571	0.0906669	-0.0101423	0.991908	0.997053
Baiap2	7691.34	0.0573778	0.085563	0.670591	0.502481	0.724935
Baiap3	106.084	-0.387541	0.256659	-1.50994	0.131058	0.362432
Bak1	251.653	-0.12523	0.140037	-0.894263	0.371181	0.618555
Bambi	59.9136	-0.233067	0.273569	-0.851949	0.394243	0.638021
Banf1	419.962	0.173748	0.10273	1.6913	0.0907786	0.296297
Bank1	180.878	0.0273498	0.142136	0.19242	0.847413	0.928486
Bap1	3201.58	-0.00867163	0.102087	-0.0849432	0.932307	0.970136
Bard1	47.9726	-0.513908	0.30624	-1.67812	0.0933228	0.300958
Barx2	281.745	0.3206	0.155272	2.06476	0.0389459	0.18543
Basp1	9983.48	0.0943118	0.12113	0.778598	0.436217	0.675462
Bax	486.735	0.108862	0.0850612	1.27981	0.200611	0.45413
Baz1a	262.937	-0.234499	0.119786	-1.95765	0.0502705	0.21612
Baz1b	6396.05	-0.0702903	0.0522327	-1.34571	0.178394	0.425096
Baz2a	2477.02	-0.138962	0.0757464	-1.83457	0.0665701	0.25043
Baz2b	5806.77	-0.102324	0.104723	-0.977086	0.328527	0.582935
Bbc3	87.6836	-0.506348	0.224493	-2.25552	0.0241007	0.141
Bbip1	1610.96	0.151432	0.116045	1.30494	0.191914	0.442108
Bbof1	687.049	0.0725769	0.137163	0.529129	0.596716	0.788438
Bbs1	1280.78	-0.0166325	0.0931457	-0.178564	0.85828	0.933302
Bbs10	174.953	0.044735	0.16158	0.276859	0.781888	0.896198
Bbs2	1098.25	-0.298136	0.0657536	-4.53413	5.78403e-06	0.000478262
Bbs4	1902.09	0.0127462	0.0822645	0.154942	0.876867	0.94236
Bbs5	876.353	0.0742129	0.0906722	0.818475	0.413086	0.654928
Bbs7	1152.44	-0.00409222	0.0854923	-0.0478665	0.961823	0.984525
Bbs9	2318.63	-0.189152	0.0989998	-1.91063	0.0560521	0.228593
Bbx	3485.37	0.118731	0.11596	1.0239	0.305882	0.564478
BC003965	701.036	0.224464	0.0874233	2.56755	0.0102419	0.0831354
BC031181	2076.25	0.0146432	0.102395	0.143008	0.886284	0.946739
Bcam	178.405	0.0465949	0.154378	0.301824	0.762786	0.88614
Bcan	2801.33	-0.00051706	0.083008	-0.00622904	0.99503	0.997766
Bcap29	1139.99	0.151599	0.165681	0.915005	0.360189	0.609468
Bcap31	1540.9	-0.0108399	0.0739075	-0.146668	0.883394	0.945575
Bcar1	1090.17	-0.230195	0.106621	-2.159	0.0308504	0.161408
Bcar3	716.975	-0.020805	0.104587	-0.198925	0.842321	0.925748
Bcas1	3449.41	0.239282	0.0640749	3.73441	0.000188153	0.00630718
Bcas2	1327.7	0.119129	0.0937489	1.27073	0.203825	0.458311
Bcas3	5666.3	-0.277014	0.103588	-2.6742	0.00749082	0.0693292
Bcat1	2995.33	-0.04979	0.0858937	-0.57967	0.562137	0.766174
Bcat2	403.349	-0.125749	0.115219	-1.09139	0.275103	0.537086
Bccip	1326.19	0.0836607	0.0976173	0.857027	0.39143	0.635573
Bcdin3d	116.87	0.286276	0.154058	1.85823	0.0631366	0.242892
Bche	291.051	0.0362631	0.156204	0.232153	0.816419	0.913738
Bckdha	757.484	-0.264322	0.0807942	-3.27155	0.0010696	0.0200396
Bckdhb	2142.08	-0.0493419	0.0985883	-0.500485	0.616734	0.800148
Bckdk	801.074	-0.0332949	0.122383	-0.272055	0.785579	0.897758
Bcl10	358.542	0.267014	0.10656	2.50577	0.0122186	0.0929169
Bcl11a	5078.65	-0.198705	0.111726	-1.7785	0.075322	0.269382
Bcl11b	3710.89	-0.047745	0.0910926	-0.524137	0.600183	0.789403
Bcl2	1971.84	0.0422876	0.103124	0.410067	0.681757	0.838274
Bcl2l1	2478.32	0.27086	0.0892894	3.03351	0.00241729	0.0338012
Bcl2l11	153.044	0.0497681	0.195416	0.254678	0.798972	0.905818
Bcl2l12	37.9301	0.163636	0.264951	0.617608	0.536833	0.749476
Bcl2l13	1777.61	0.0417425	0.0611084	0.68309	0.49455	0.718343
Bcl2l15	51.584	0.0557936	0.257579	0.216608	0.828514	0.919284
Bcl6	647.079	0.240058	0.133651	1.79615	0.0724707	0.264065
Bcl7a	2337.32	-0.0682462	0.0797644	-0.855597	0.392221	0.636063
Bcl7b	904.837	0.101854	0.0992049	1.02671	0.304559	0.563798
Bcl7c	411.56	-0.0477182	0.123401	-0.386694	0.698983	0.849528
Bcl9	1222.69	-0.0157207	0.0888509	-0.176933	0.859561	0.934296
Bcl9l	367.421	-0.121829	0.149289	-0.81606	0.414466	0.656277
Bclaf1	9311.17	0.102147	0.124535	0.820228	0.412086	0.654155
Bco2	104.868	0.143251	0.217123	0.659768	0.509403	0.730503
Bcor	1440.45	0.175269	0.0724461	2.4193	0.0155502	0.107126
Bcorl1	915.337	-0.132484	0.0925193	-1.43196	0.152156	0.390238
Bcr	4136.29	-0.0990005	0.0924668	-1.07066	0.284322	0.545299
Bcs1l	352.733	0.0611107	0.108759	0.561892	0.574189	0.773455
Bdh1	1651.54	-0.0966609	0.0843745	-1.14562	0.251954	0.512796
Bdnf	1162.59	0.559616	0.151454	3.69495	0.000219934	0.00701245
Bdp1	4027.5	0.174789	0.0862648	2.0262	0.0427446	0.195394
Bean1	381.389	-0.266313	0.124268	-2.14305	0.0321087	0.165041
Becn1	3001.56	0.110042	0.0677117	1.62516	0.104129	0.318814
Begain	1163.9	-0.0829191	0.122623	-0.676214	0.498905	0.72196
Bend3	318.397	-0.381036	0.132959	-2.86582	0.00415927	0.0472566
Bend4	510.464	-0.0591277	0.0973622	-0.607297	0.543654	0.755268
Bend6	4711.06	-0.0848292	0.0914595	-0.927507	0.353664	0.603562
Bend7	175.494	-0.863783	0.312042	-2.76816	0.00563733	0.0569843
Bet1	593.159	0.331431	0.15102	2.19462	0.0281909	0.154128
Bex1	1302.84	-0.127519	0.0779126	-1.63669	0.101695	0.314833
Bex2	6364.92	0.0460571	0.0843356	0.546116	0.584986	0.780506
Bex4	320.149	0.0846913	0.140734	0.601783	0.547319	0.757448
Bfar	1450.92	0.131523	0.0849398	1.54842	0.12152	0.347525
Bfsp2	108.341	0.00426947	0.183614	0.0232524	0.981449	0.993477
Bgn	168.979	0.0940895	0.180087	0.522467	0.601345	0.790094
Bhlhb9	2547	0.256555	0.0959123	2.67489	0.00747539	0.0692954
Bhlhe22	708.704	0.589053	0.170497	3.45493	0.000550445	0.0126195
Bhlhe40	2148.23	0.395803	0.0895813	4.41836	9.94513e-06	0.000713003
Bhlhe41	1012.52	0.00336676	0.113757	0.0295961	0.976389	0.991417
Bicc1	852.008	-0.438571	0.14987	-2.92633	0.00342985	0.0428835
Bicd1	7147.89	0.187419	0.141807	1.32165	0.186284	0.434709
Bicd2	2452.03	-0.0357357	0.1038	-0.344274	0.73064	0.868877
Bid	312.665	-0.319281	0.149475	-2.13602	0.0326776	0.166653
Bin1	6699.22	-0.181608	0.0965228	-1.88151	0.0599029	0.236638
Bin2	97.7056	-0.437037	0.214378	-2.03863	0.0414866	0.1925
Bin3	735.492	-0.305138	0.08382	-3.64039	0.000272221	0.00785222
Birc2	1866.4	0.130094	0.0924244	1.40757	0.159258	0.400258
Birc3	125.047	-0.369123	0.179541	-2.05592	0.0397902	0.18744
Birc6	15144.1	-0.0418156	0.0632277	-0.661349	0.508389	0.730099
Bivm	882.431	0.208308	0.0737277	2.82537	0.00472258	0.0513519
Blcap	1905.89	-0.0324923	0.0755679	-0.429974	0.667214	0.829833
Blm	417.756	-0.287065	0.124321	-2.30907	0.0209397	0.128381
Blmh	2142.76	-0.0794322	0.0569752	-1.39416	0.163271	0.40528
Blnk	431.855	0.496006	0.108248	4.58214	4.60244e-06	0.000399189
Bloc1s1	323.881	-0.584746	0.357782	-1.63436	0.102183	0.315738
Bloc1s2	648.915	-0.0147815	0.0915267	-0.161499	0.8717	0.940347
Bloc1s3	174.204	0.158366	0.14056	1.12668	0.259876	0.520802
Bloc1s4	140.389	0.416842	0.202006	2.06351	0.0390644	0.185769
Bloc1s5	439.046	-0.498608	0.102918	-4.84472	1.26792e-06	0.000149772
Bloc1s6	811.854	0.0494628	0.0839194	0.589408	0.555588	0.762203
Blvra	562.945	0.0113647	0.0990341	0.114755	0.908639	0.957486
Blvrb	198.392	-0.377201	0.191952	-1.96508	0.0494053	0.213957
Blzf1	837.526	0.215286	0.127289	1.69132	0.0907766	0.296297
Bmf	138.384	0.395946	0.178804	2.21441	0.0268003	0.150267
Bmi1	1648.79	0.147146	0.106145	1.38627	0.165664	0.407684
Bmp1	932.566	-0.0222177	0.0802089	-0.276998	0.781781	0.896158
Bmp2	85.6606	0.638505	0.220997	2.88921	0.00386215	0.0454912
Bmp2k	1627.45	-0.0632138	0.0795749	-0.794393	0.426966	0.668341
Bmp3	1210.76	-0.048486	0.111657	-0.434242	0.664112	0.828671
Bmp4	53.912	-0.159627	0.247362	-0.645317	0.518722	0.737641
Bmp5	104.158	0.127265	0.273443	0.465418	0.641632	0.816054
Bmp6	283.682	-0.235718	0.19012	-1.23984	0.215034	0.470715
Bmp7	234.137	-0.135672	0.144682	-0.937729	0.348384	0.59989
Bmper	931.11	-0.227385	0.113206	-2.00859	0.0445805	0.200774
Bmpr1a	3215.89	0.0617616	0.107063	0.576872	0.564026	0.767047
Bmpr1b	2238.32	0.161854	0.107312	1.50826	0.131489	0.363138
Bmpr2	13118.2	0.265256	0.113025	2.34689	0.018931	0.12148
Bms1	1647.19	0.047589	0.0614263	0.774734	0.438497	0.677329
Bmx	56.1294	-0.739061	0.337272	-2.19129	0.0284306	0.154592
Bmyc	364.696	-0.0696751	0.240298	-0.289953	0.771852	0.890219
Bnc2	390.205	-0.0232364	0.132157	-0.175824	0.860432	0.934649
Bnip1	430.366	0.000373422	0.147551	0.0025308	0.997981	0.999316
Bnip2	1249.27	-0.0344383	0.0768103	-0.448355	0.653897	0.823547
Bnip3	3305.13	0.186199	0.123852	1.5034	0.132736	0.36463
Bnip3l	4020.69	0.250386	0.0941261	2.66011	0.00781148	0.0710306
Boc	1514.59	-0.0795864	0.0810545	-0.981887	0.326155	0.581952
Bod1	1363.79	-0.0371698	0.0789993	-0.470508	0.637992	0.813929
Bod1l	5805.89	0.0479829	0.0705149	0.680465	0.49621	0.719656
Bok	688.958	-0.118059	0.0968405	-1.2191	0.222805	0.480497
Bola1	195.732	-0.251214	0.243219	-1.03287	0.301666	0.561038
Bola2	637.828	0.193994	0.0881535	2.20064	0.0277617	0.152831
Bola3	347.791	0.228352	0.122021	1.87142	0.0612875	0.239489
Bop1	1132.51	-0.0567449	0.145622	-0.389672	0.696779	0.848518
Bora	215.946	-0.29704	0.15883	-1.87018	0.0614591	0.239489
Borcs5	1156.39	-0.115994	0.0811138	-1.43001	0.152713	0.39053
Borcs6	277.088	0.0603524	0.235783	0.255966	0.797977	0.90535
Borcs7	557.021	-0.0294352	0.11901	-0.247333	0.80465	0.907858
Borcs8	960.604	-0.260206	0.0869851	-2.99138	0.00277719	0.0372624
Bpgm	1390.95	-0.0297441	0.0888807	-0.334652	0.737887	0.873192
Bphl	867.83	-0.2003	0.0823715	-2.43167	0.0150293	0.105996
Bpnt1	2143.63	0.144731	0.0654253	2.21215	0.0269561	0.150399
Bptf	6401.09	-0.152307	0.0713519	-2.13459	0.0327943	0.167042
Braf	11516.7	0.0609233	0.0863087	0.705876	0.480265	0.707786
Brap	2186.69	0.0366016	0.0847821	0.431714	0.665949	0.829197
Brat1	585.921	-0.101872	0.0934691	-1.0899	0.275758	0.537181
Brca1	60.0088	0.256907	0.247543	1.03783	0.299351	0.559038
Brca2	398.784	-0.108444	0.163042	-0.665128	0.505969	0.728189
Brcc3	1627.79	0.140899	0.11798	1.19426	0.232376	0.490826
Brd1	2727.73	-0.00590262	0.0669086	-0.0882192	0.929702	0.968512
Brd2	3753	0.0313858	0.0806497	0.389162	0.697156	0.848644
Brd3	1470.38	0.0136349	0.0687428	0.198346	0.842774	0.925996
Brd4	3796.67	-0.243333	0.0883177	-2.7552	0.00586565	0.0587654
Brd7	1446.84	0.0651405	0.067619	0.963345	0.335374	0.588591
Brd8	2606.54	-0.13553	0.0624832	-2.16907	0.0300774	0.159392
Brd9	2729.62	-0.0219654	0.0756516	-0.290349	0.771549	0.89003
Brdt	1252.5	-0.086648	0.0932148	-0.929552	0.352603	0.603385
Bre	3386.07	-0.348158	0.103843	-3.35275	0.000800134	0.0162673
Brf1	1330.78	-0.210287	0.0906073	-2.32087	0.020294	0.126237
Brf2	319.606	-0.154072	0.114107	-1.35024	0.176938	0.423006
Bri3	594.113	-0.257634	0.0848218	-3.03736	0.00238662	0.0335615
Bri3bp	4401.88	0.215148	0.074219	2.89882	0.00374569	0.0448868
Brinp1	19755.2	0.0679377	0.0733096	0.926723	0.35407	0.603731
Brinp2	5871.96	0.0290962	0.0928197	0.31347	0.753924	0.881081
Brinp3	7602.4	0.415996	0.138744	2.9983	0.00271487	0.0366152
Brix1	567.558	0.279135	0.13029	2.14241	0.0321607	0.165156
Brk1	3316.5	0.148782	0.0661409	2.24947	0.0244824	0.142227
Brms1	490.679	-0.0364996	0.104776	-0.348357	0.727572	0.867425
Brms1l	2525.58	-0.0182514	0.0681708	-0.26773	0.788907	0.899524
Brox	2581.55	0.0879944	0.0922113	0.954269	0.339947	0.593353
Brpf1	1001.98	-0.06927	0.115182	-0.601398	0.547575	0.757565
Brpf3	1033.09	-0.203666	0.0830155	-2.45334	0.0141535	0.102061
Brsk1	4315.89	0.0265317	0.0754488	0.351652	0.7251	0.866167
Brsk2	5077.32	-0.148468	0.0985298	-1.50683	0.131854	0.363662
Brwd1	9524.72	-0.0890449	0.0545469	-1.63245	0.102586	0.316323
Brwd3	1525.98	0.300108	0.136845	2.19306	0.0283033	0.154171
Bscl2	1775.3	0.0197141	0.0851063	0.231642	0.816816	0.913935
Bsdc1	1387.7	-0.0523073	0.0715193	-0.731373	0.464551	0.695957
Bsg	7476.74	-0.171082	0.128465	-1.33173	0.182948	0.429999
Bsn	16635.3	-0.00494176	0.145098	-0.0340582	0.972831	0.989341
Bst2	67.0523	-0.0433472	0.222837	-0.194524	0.845766	0.927419
Btaf1	5908.45	0.361709	0.110539	3.27223	0.00106703	0.0200217
Btbd1	4434	0.047738	0.073413	0.650266	0.51552	0.735013
Btbd10	6112.24	0.144961	0.0788758	1.83784	0.0660855	0.249139
Btbd11	1416.22	-0.149269	0.115272	-1.29493	0.195344	0.447352
Btbd16	36.2121	0.941858	0.317228	2.96903	0.00298742	0.0392609
Btbd17	264.19	0.251955	0.14213	1.7727	0.0762779	0.271393
Btbd19	140.805	-0.0607256	0.170606	-0.355941	0.721885	0.864008
Btbd2	919.98	-0.163402	0.108181	-1.51045	0.130928	0.362365
Btbd3	5773.01	0.115107	0.0635014	1.81266	0.0698842	0.258045
Btbd6	818.835	-0.101935	0.158967	-0.641231	0.521373	0.739215
Btbd7	2242.45	-0.114031	0.118984	-0.958367	0.337878	0.591739
Btbd9	7390.67	-0.177477	0.106596	-1.66495	0.0959221	0.305292
Btd	201.139	-0.0244197	0.156816	-0.155722	0.876252	0.941944
Btf3	2174.12	0.0604915	0.0650161	0.930408	0.35216	0.603043
Btf3l4	2083.57	0.0545895	0.102328	0.533478	0.593703	0.786048
Btg1	530.618	0.223288	0.139121	1.60499	0.108495	0.325277
Btg2	285.134	0.106811	0.255815	0.417533	0.676289	0.835447
Btg3	267.397	0.300421	0.174063	1.72593	0.0843599	0.286239
Btk	52.8788	0.0545227	0.278552	0.195736	0.844816	0.926906
Btn2a2	43.7798	-0.616289	0.294335	-2.09383	0.0362748	0.177698
Btrc	7117.63	-0.0852663	0.0547449	-1.55752	0.119347	0.344343
Bub1b	94.3306	-0.00882693	0.330447	-0.0267121	0.978689	0.992295
Bub3	1612.99	-0.0478631	0.0873789	-0.547765	0.583853	0.779435
Bud13	244.552	0.0960227	0.111197	0.863539	0.387841	0.632805
Bud31	942.74	0.250942	0.107796	2.32794	0.0199152	0.124878
Bves	56.7179	-0.465229	0.349054	-1.33283	0.182588	0.429396
Bysl	638.872	0.173254	0.0977839	1.7718	0.0764275	0.271458
Bzrap1	6732.19	-0.133049	0.0734808	-1.81067	0.0701922	0.258951
Bzw1	7051.41	0.336364	0.110838	3.03475	0.00240738	0.0337006
Bzw2	1678.68	-0.0256623	0.0881365	-0.291165	0.770925	0.889728
C1d	1601.47	0.203321	0.103784	1.95908	0.0501031	0.215775
C1galt1	1271.72	0.12633	0.139787	0.903732	0.366137	0.614423
C1galt1c1	576.958	0.187649	0.109831	1.70852	0.087539	0.29171
C1qa	453.502	0.495123	0.12791	3.87087	0.000108449	0.00442464
C1qb	565.26	0.0836013	0.154732	0.540296	0.588993	0.783096
C1qbp	658.78	0.0274188	0.0975704	0.281016	0.778698	0.894029
C1qc	561.432	0.313116	0.0828678	3.77851	0.000157773	0.00563935
C1ql1	95.345	0.224421	0.195063	1.15051	0.249936	0.510869
C1ql3	2431.66	-0.00491722	0.109013	-0.0451066	0.964022	0.985475
C1qtnf1	77.2468	0.014401	0.185195	0.0777613	0.938018	0.973413
C1qtnf4	1152.1	-0.223391	0.342141	-0.652921	0.513807	0.733259
C1qtnf7	78.7359	-0.0131585	0.224833	-0.0585255	0.95333	0.980119
C1ra	109.433	0.232341	0.194417	1.19506	0.232062	0.490826
C2cd2	563.03	-0.18777	0.100904	-1.86088	0.0627606	0.242067
C2cd2l	2349.01	0.119028	0.0704715	1.68902	0.0912161	0.297063
C2cd3	1581.92	0.0491225	0.0781803	0.628323	0.529793	0.74501
C2cd4c	264.272	-0.0826033	0.110123	-0.7501	0.453194	0.687076
C2cd5	5362.73	-0.118861	0.0909588	-1.30676	0.191295	0.441337
C3ar1	78.2312	-0.0176894	0.221033	-0.0800304	0.936213	0.972136
C4b	327.344	-0.698132	0.131519	-5.30821	1.10707e-07	2.06791e-05
C7	97.9365	-0.640721	0.24699	-2.59412	0.00948333	0.0792599
Caap1	1016.07	0.272148	0.161149	1.6888	0.0912576	0.297078
Cab39	7486.43	0.173193	0.0810997	2.13556	0.0327154	0.166731
Cab39l	1431.6	0.133541	0.0945131	1.41293	0.157676	0.39847
Cabin1	4610.37	-0.301193	0.0843946	-3.56887	0.000358525	0.00944116
Cables1	1988.21	-0.19383	0.0793774	-2.44188	0.0146109	0.104328
Cables2	813.287	-0.261943	0.114087	-2.29599	0.0216765	0.131985
Cabp1	4631.47	-0.276437	0.0967582	-2.85699	0.00427677	0.0479508
Cabp7	233.492	0.158276	0.132084	1.19829	0.230803	0.489351
Cacfd1	923.861	-0.0312774	0.111105	-0.281513	0.778317	0.89394
Cachd1	548.273	-0.224743	0.126185	-1.78107	0.0749014	0.269072
Cacna1a	10098	-0.274466	0.103603	-2.6492	0.0080683	0.0722792
Cacna1b	9168.99	-0.317325	0.115487	-2.74772	0.00600109	0.0596885
Cacna1c	15233.8	-0.579695	0.333893	-1.73617	0.0825338	0.283896
Cacna1d	8148.45	-0.474798	0.16591	-2.86178	0.00421274	0.047558
Cacna1e	26739.5	-0.0547754	0.103372	-0.529886	0.596191	0.78808
Cacna1g	2519.42	0.098529	0.131505	0.74924	0.453713	0.68761
Cacna1h	1241.47	-0.524201	0.14469	-3.62292	0.000291301	0.00819275
Cacna1i	4592.65	-0.103164	0.118844	-0.868059	0.385362	0.630643
Cacna2d1	25357	0.0478512	0.129502	0.369503	0.711753	0.857491
Cacna2d2	970.161	-0.139543	0.110924	-1.25801	0.208388	0.462865
Cacna2d3	23452.4	0.0262709	0.103086	0.254844	0.798844	0.905818
Cacna2d4	139.851	-0.195773	0.157364	-1.24408	0.213471	0.468041
Cacnb1	2709.26	0.0548835	0.102776	0.534009	0.593336	0.785813
Cacnb2	10737.2	-0.144678	0.0894777	-1.61692	0.105896	0.320767
Cacnb3	3373.15	-0.0789694	0.133657	-0.590835	0.554631	0.76163
Cacnb4	24177.5	0.0693922	0.0857884	0.808876	0.418586	0.660202
Cacng2	3093.79	0.160166	0.0646391	2.47785	0.0132178	0.0975076
Cacng3	4050.55	-0.249351	0.0993702	-2.50931	0.0120967	0.0922933
Cacng4	627.664	-0.180473	0.116304	-1.55174	0.120724	0.346366
Cacng5	284.494	-1.18375	0.611202	-1.93676	0.0527744	0.220709
Cacng7	1870.56	-0.250679	0.0704177	-3.55988	0.000371018	0.00966751
Cacng8	1760.58	-0.0478708	0.0681992	-0.701926	0.482725	0.709936
Cactin	374.256	0.0973977	0.133061	0.731977	0.464182	0.695772
Cacul1	3361.51	0.0407696	0.0943548	0.432089	0.665677	0.829104
Cacybp	2077.06	0.291681	0.0978741	2.98016	0.00288094	0.0383394
Cad	438.728	-0.0234601	0.14494	-0.16186	0.871416	0.94025
Cadm1	17847.5	-0.215662	0.144429	-1.4932	0.135384	0.36834
Cadm2	79159.6	0.1699	0.146269	1.16155	0.245417	0.505998
Cadm3	9452.53	-0.0651234	0.126449	-0.515015	0.606542	0.793447
Cadm4	5049.09	0.0110748	0.115207	0.0961296	0.923418	0.965581
Cadps	32366.4	-0.237332	0.105956	-2.23992	0.0250964	0.144845
Cadps2	10624.2	0.0995846	0.0863683	1.15302	0.248901	0.510518
Cage1	307.808	0.071664	0.150245	0.476981	0.633376	0.810624
Calb1	3711.9	0.322648	0.0892225	3.61622	0.000298941	0.00836554
Calcoco1	1269.47	-0.201126	0.0986785	-2.03819	0.0415309	0.1925
Calcrl	330.467	0.170088	0.215335	0.789875	0.429601	0.670893
Cald1	896.67	-0.0310159	0.0926756	-0.334672	0.737873	0.873192
Calhm2	342.363	0.12508	0.110676	1.13015	0.258414	0.519383
Calm1	105009	0.100338	0.108285	0.926602	0.354133	0.603755
Calm2	53924.2	0.00135182	0.0995418	0.0135804	0.989165	0.996328
Calm3	39067.8	-0.00491859	0.131535	-0.0373937	0.970171	0.988096
Caln1	11337.8	-0.0662145	0.0919548	-0.720077	0.471478	0.701783
Calr	9917.27	0.343557	0.0666926	5.15135	2.58622e-07	4.22064e-05
Calu	2739.19	0.0829125	0.0725761	1.14242	0.253278	0.514732
Caly	2010.62	-0.185791	0.114603	-1.62116	0.104983	0.320319
Camk1	1720.32	0.0718506	0.134114	0.535742	0.592137	0.785484
Camk1d	11636.1	-0.114992	0.106182	-1.08297	0.278824	0.53988
Camk1g	1268.8	0.229966	0.151871	1.51422	0.129969	0.360734
Camk2a	38480.3	0.0878777	0.10208	0.860869	0.38931	0.634329
Camk2b	18488.4	-0.0935655	0.081493	-1.14814	0.25091	0.512114
Camk2d	4525.49	-0.141243	0.109822	-1.28612	0.198403	0.451025
Camk2g	9167.62	-6.00553e-05	0.0839438	-0.000715423	0.999429	0.999811
Camk2n1	41796.8	0.553739	0.180723	3.06403	0.00218378	0.0315681
Camk2n2	564.727	0.167987	0.0944129	1.77928	0.0751933	0.26921
Camk4	22039.1	0.308774	0.0776564	3.97615	7.0039e-05	0.00309144
Camkk1	3459.68	0.135313	0.120908	1.11914	0.26308	0.524173
Camkk2	9321.59	0.228595	0.0547196	4.17756	2.94651e-05	0.00160994
Camkmt	2226.43	-0.258074	0.118872	-2.17104	0.0299285	0.15911
Camkv	9881.49	-0.159444	0.11178	-1.42641	0.153751	0.391496
Caml	1212.27	0.165069	0.110166	1.49837	0.134037	0.366489
Camsap1	5076.95	-0.0283656	0.0827344	-0.342851	0.731711	0.869625
Camsap2	10454.9	0.115251	0.0482654	2.38786	0.0169469	0.112522
Camsap3	553.474	0.0199183	0.148598	0.134041	0.89337	0.950053
Camta1	11860.1	-0.213179	0.113941	-1.87096	0.0613503	0.239489
Camta2	3536.9	0.180763	0.0935755	1.93174	0.0533922	0.222148
Cand1	7546.98	0.0501905	0.0589417	0.851527	0.394477	0.63815
Cand2	97.8384	-0.519973	0.204484	-2.54285	0.0109953	0.0871962
Cant1	921.447	-0.0305427	0.0860714	-0.354853	0.7227	0.86439
Canx	16421	0.217363	0.0770363	2.82156	0.00477908	0.0516952
Cap1	6153.42	0.0239144	0.110533	0.216354	0.828712	0.919284
Cap2	10622.1	0.0720626	0.0528373	1.36386	0.172612	0.417463
Capn1	502.311	-0.0620192	0.104123	-0.595633	0.551421	0.760651
Capn10	558.36	-0.0512031	0.0899728	-0.569095	0.569291	0.770086
Capn15	1306.85	-0.144587	0.092893	-1.55649	0.119592	0.344874
Capn2	1853.9	-0.155532	0.0749598	-2.07487	0.0379989	0.182392
Capn3	149.074	-0.00202294	0.177135	-0.0114203	0.990888	0.996674
Capn5	1148.72	-0.0749679	0.128974	-0.581264	0.561062	0.765214
Capn6	116.961	-0.797229	0.244852	-3.25597	0.00113007	0.0206174
Capn7	2060.47	0.107968	0.0889554	1.21373	0.224852	0.483032
Capns1	1651.02	-0.236358	0.140711	-1.67974	0.0930089	0.300492
Caprin1	9044.44	0.19528	0.0611579	3.19304	0.00140782	0.024087
Caprin2	420.148	-0.256052	0.177581	-1.44189	0.149334	0.386845
Capza1	1815.39	0.00349153	0.0995067	0.0350884	0.972009	0.989048
Capza2	7623.6	0.225174	0.106768	2.109	0.034945	0.173577
Capzb	4054.92	0.0121524	0.0717096	0.169467	0.865429	0.937364
Car10	19770.9	-0.149898	0.124653	-1.20253	0.229158	0.487646
Car11	3315.49	0.0945712	0.138513	0.682762	0.494757	0.718343
Car12	457.208	0.274014	0.155509	1.76205	0.0780611	0.27472
Car13	53.3734	0.0318618	0.231385	0.137701	0.890477	0.948402
Car14	170.946	0.143881	0.147822	0.973335	0.330387	0.584647
Car2	3576.94	0.0796405	0.072845	1.09329	0.274268	0.536397
Car4	651.08	0.176943	0.115305	1.53456	0.124892	0.352454
Car5b	146.1	-0.0161747	0.172295	-0.0938778	0.925206	0.966291
Car7	770.794	0.0181363	0.0754116	0.240498	0.809944	0.911426
Car8	494.897	0.238009	0.0906194	2.62647	0.0086276	0.0749357
Card10	46.0852	-1.05108	0.285045	-3.68742	0.000226535	0.00713372
Card19	105.712	-0.0408658	0.19199	-0.212854	0.831441	0.921007
Card6	37.9671	0.633611	0.263854	2.40137	0.0163339	0.110103
Card9	39.5405	-0.0198479	0.264471	-0.0750477	0.940177	0.974667
Carf	1439.99	-0.0297075	0.142377	-0.208654	0.834719	0.922068
Carhsp1	916.289	0.0454845	0.130478	0.3486	0.727389	0.867398
Carkd	1075.67	-0.221543	0.11163	-1.98461	0.047188	0.208134
Carm1	1535.29	-0.182046	0.0789698	-2.30526	0.0211519	0.129363
Carnmt1	844.103	-0.0350628	0.1362	-0.257436	0.796843	0.904479
Carns1	187.6	-0.0695048	0.183017	-0.379772	0.704114	0.852761
Cars	1639.05	-0.188995	0.0712066	-2.65418	0.00795021	0.0717138
Cars2	486.666	-0.455089	0.125011	-3.64039	0.000272229	0.00785222
Cartpt	127.231	0.197543	0.223948	0.882093	0.377727	0.62405
Casc1	50.9068	-0.134799	0.257785	-0.522914	0.601034	0.790019
Casc3	1644.7	-0.0813079	0.0856588	-0.949206	0.342516	0.595566
Casc4	5769.37	0.12314	0.101757	1.21013	0.226227	0.484611
Casd1	2599.7	0.143654	0.0705232	2.03697	0.0416531	0.192896
Cask	8198.82	0.0222924	0.119973	0.185812	0.852592	0.930116
Caskin1	2270.7	-0.0472242	0.140159	-0.336934	0.736166	0.872498
Caskin2	280.301	-0.0438108	0.118776	-0.368853	0.712237	0.857804
Casp12	58.2455	-0.148764	0.28943	-0.51399	0.607259	0.793805
Casp2	629.633	-0.00463571	0.0988779	-0.0468831	0.962606	0.984828
Casp3	322.458	-0.122374	0.138514	-0.883481	0.376976	0.623668
Casp6	62.3043	-0.0380727	0.23193	-0.164156	0.869608	0.939311
Casp7	128.31	-0.209719	0.199199	-1.05281	0.292428	0.552232
Casp8	132.589	0.0102696	0.164427	0.0624567	0.950199	0.978658
Casp8ap2	1272.91	0.120468	0.102412	1.1763	0.239473	0.499191
Casp9	573.58	-0.0236702	0.105861	-0.223598	0.82307	0.916533
Casq2	98.3546	0.0924346	0.31381	0.294556	0.768333	0.888876
Cast	319.553	0.0807113	0.153907	0.524415	0.59999	0.789303
Casz1	49.3679	0.545285	0.232092	2.34944	0.0188019	0.120892
Cat	1074.08	0.154972	0.0740055	2.09406	0.0362551	0.177698
Catip	128.764	-0.25435	0.247824	-1.02633	0.304734	0.563953
Catsper2	330.791	-0.119789	0.116345	-1.02961	0.303195	0.5627
Catsperg1	53.9854	-1.30303	0.324216	-4.01902	5.84416e-05	0.00270467
Cav1	336.057	0.116456	0.128831	0.903939	0.366028	0.614353
Cav2	1213.94	0.198509	0.126354	1.57105	0.11617	0.339305
Cbarp	2778.82	0.107982	0.164117	0.65796	0.510564	0.731212
Cbfa2t2	3772.12	-0.098873	0.0627129	-1.5766	0.114888	0.336706
Cbfa2t3	428.943	0.15299	0.161537	0.947088	0.343594	0.596858
Cbfb	934.51	0.222148	0.112507	1.97452	0.0483227	0.211261
Cbl	3429.77	0.0739066	0.0674389	1.0959	0.273121	0.535389
Cblb	2617.73	0.0214579	0.12264	0.174967	0.861105	0.934817
Cbll1	906.713	0.221276	0.130559	1.69484	0.0901057	0.295757
Cbln1	83.5669	-0.233165	0.310253	-0.751532	0.452333	0.686667
Cbln2	1460.03	0.368727	0.107718	3.42306	0.000619206	0.0136655
Cbln4	347.939	1.17633	0.19934	5.90111	3.61066e-09	1.35869e-06
Cbr1	877.93	-0.0258636	0.11697	-0.221113	0.825004	0.917348
Cbr3	164.038	-0.0778559	0.260545	-0.298819	0.765078	0.887182
Cbr4	548.68	-0.186202	0.112534	-1.65462	0.0980008	0.308739
Cbs	500.34	0.062495	0.138764	0.450368	0.652445	0.82247
Cbwd1	768.747	0.177495	0.144458	1.22869	0.219187	0.476441
Cbx1	1740.03	0.129394	0.108302	1.19475	0.232183	0.490826
Cbx2	57.1462	0.269838	0.305699	0.882692	0.377403	0.62405
Cbx3	2398.24	0.287038	0.264461	1.08537	0.277758	0.538622
Cbx4	863.85	0.171921	0.101211	1.69863	0.089389	0.294943
Cbx5	12887.6	0.179102	0.0657763	2.72289	0.00647133	0.0628535
Cbx6	142.381	-0.0263764	0.190656	-0.138345	0.889967	0.948142
Cbx7	913.817	-0.245806	0.109979	-2.23504	0.0254149	0.145801
Cbx8	239.739	0.218326	0.126171	1.7304	0.0835591	0.285426
Cby1	677.014	0.0356336	0.0829015	0.429831	0.667319	0.829833
Cc2d1a	812.541	0.0291007	0.0973687	0.298871	0.765038	0.887182
Cc2d1b	957.197	-0.104589	0.0748561	-1.3972	0.162354	0.40388
Cc2d2a	1990.79	-0.182378	0.0931168	-1.95859	0.0501607	0.215872
Cc2d2b	40.1485	-0.382709	0.27305	-1.40161	0.161033	0.402842
Ccar1	3439.86	0.0973781	0.113844	0.855362	0.392351	0.636063
Ccar2	2572.71	-0.0549764	0.0800566	-0.68672	0.492259	0.716771
Ccbe1	820.794	-0.481179	0.183667	-2.61985	0.00879689	0.0758747
Ccdc106	552.777	0.0842219	0.0828092	1.01706	0.309125	0.568012
Ccdc107	261.824	0.0729917	0.130034	0.56133	0.574573	0.773455
Ccdc112	452.776	-0.110207	0.142124	-0.775427	0.438087	0.67683
Ccdc113	107.178	-0.0944269	0.167274	-0.564503	0.572412	0.772034
Ccdc114	43.9889	-0.0776586	0.375885	-0.206602	0.836321	0.922902
Ccdc115	403.467	0.180198	0.10113	1.78185	0.0747742	0.268819
Ccdc116	67.0294	-0.37946	0.225298	-1.68426	0.092132	0.298562
Ccdc117	568.318	0.0946067	0.104933	0.901592	0.367273	0.615309
Ccdc12	1065.02	-0.0363857	0.098689	-0.368691	0.712358	0.857804
Ccdc120	238.359	0.0362274	0.127927	0.283188	0.777033	0.893357
Ccdc122	132.738	0.175548	0.207057	0.847826	0.396535	0.639781
Ccdc124	1286.51	0.0567665	0.171236	0.331509	0.74026	0.874318
Ccdc126	392.64	0.0625977	0.141127	0.443557	0.657363	0.825394
Ccdc127	2889.32	0.197058	0.069346	2.84167	0.00448784	0.0494826
Ccdc129	125.468	0.114516	0.189963	0.602832	0.546621	0.757268
Ccdc13	164.578	-0.0643849	0.171292	-0.375879	0.707007	0.854596
Ccdc130	295.363	0.0016028	0.135049	0.0118683	0.990531	0.996557
Ccdc134	326.999	0.111721	0.117429	0.951392	0.341405	0.59477
Ccdc136	2683.06	-0.117425	0.0736256	-1.59489	0.110736	0.329289
Ccdc137	504.919	-0.0038826	0.0893567	-0.0434506	0.965342	0.985931
Ccdc138	386.581	0.157875	0.147814	1.06806	0.285494	0.546157
Ccdc14	158.94	-0.527206	0.15117	-3.48751	0.000487541	0.0116512
Ccdc141	1066.32	-0.0547279	0.130786	-0.418453	0.675616	0.83521
Ccdc148	1616.2	-0.259911	0.11421	-2.27572	0.0228625	0.136263
Ccdc149	2436.44	-0.195773	0.0964415	-2.02996	0.0423605	0.194808
Ccdc15	303.377	-0.186532	0.206819	-0.90191	0.367104	0.615214
Ccdc151	125.555	-0.0894704	0.205904	-0.434524	0.663908	0.828671
Ccdc155	140.227	-0.102294	0.163793	-0.624535	0.532276	0.746475
Ccdc157	900.376	-0.346613	0.0779361	-4.4474	8.69147e-06	0.000641669
Ccdc159	300.623	-0.0495778	0.10302	-0.481245	0.630343	0.808662
Ccdc163	83.0905	0.0871995	0.271575	0.321088	0.748144	0.878391
Ccdc166	101.488	0.0798434	0.190392	0.419363	0.674951	0.834805
Ccdc167	529.099	-0.0754124	0.101435	-0.743458	0.457204	0.690849
Ccdc17	81.9596	-0.0883635	0.205353	-0.430301	0.666977	0.829833
Ccdc171	633.695	0.129248	0.11545	1.11951	0.262921	0.524049
Ccdc173	336.019	0.0937365	0.125197	0.748713	0.45403	0.687649
Ccdc174	1058.77	0.0659917	0.0973127	0.678141	0.497682	0.720947
Ccdc177	542.343	0.0840093	0.0942468	0.891376	0.372728	0.619947
Ccdc18	126.526	0.538686	0.233532	2.30669	0.021072	0.129065
Ccdc181	746.566	0.133979	0.0910336	1.47176	0.141087	0.375676
Ccdc184	370.864	0.205227	0.122173	1.6798	0.0929955	0.300492
Ccdc186	2985.35	0.259143	0.096895	2.67448	0.00748463	0.0693292
Ccdc187	45.5681	-0.466967	0.315884	-1.47829	0.139331	0.373029
Ccdc190	146.776	0.177311	0.144998	1.22285	0.221385	0.478931
Ccdc191	532.633	0.0140319	0.114896	0.122127	0.902799	0.954554
Ccdc25	1788.13	-0.0487652	0.0781777	-0.623773	0.532777	0.746789
Ccdc28a	818.194	0.0468216	0.0789719	0.59289	0.553255	0.761312
Ccdc28b	615.759	-0.0159288	0.12911	-0.123374	0.901811	0.954203
Ccdc3	574.6	0.356041	0.115635	3.07899	0.00207701	0.0305467
Ccdc30	1348.05	-0.303625	0.105961	-2.86543	0.00416444	0.0472566
Ccdc32	1017.88	0.328138	0.11259	2.91444	0.0035633	0.0437157
Ccdc34	611.842	0.113595	0.152207	0.746318	0.455475	0.689354
Ccdc39	1165.89	0.111296	0.129645	0.858465	0.390636	0.635258
Ccdc43	797.326	0.224091	0.108902	2.05772	0.0396167	0.187091
Ccdc47	2809.86	0.00419269	0.0583353	0.0718723	0.942704	0.975745
Ccdc50	3557.17	0.097204	0.0884562	1.09889	0.271814	0.534173
Ccdc51	198.623	0.142403	0.146732	0.970501	0.331797	0.585638
Ccdc57	756.883	-0.507252	0.0866498	-5.85404	4.79774e-09	1.65295e-06
Ccdc58	649.044	-0.0116257	0.115207	-0.100911	0.919621	0.963111
Ccdc59	798.654	0.129211	0.116029	1.11361	0.265446	0.526688
Ccdc6	1916.49	0.0216677	0.0940165	0.230468	0.817729	0.91444
Ccdc61	249.056	0.135113	0.146266	0.923751	0.355616	0.605104
Ccdc62	191.363	-0.667936	0.184839	-3.61361	0.000301958	0.00840182
Ccdc65	231.364	0.113709	0.117151	0.97062	0.331737	0.585616
Ccdc66	1075.97	0.0238641	0.0892221	0.267468	0.789109	0.899524
Ccdc71	593.976	0.00162772	0.101763	0.0159952	0.987238	0.995643
Ccdc71l	485.404	0.55741	0.206664	2.69718	0.006993	0.066058
Ccdc73	63.064	-0.174232	0.307754	-0.566139	0.571299	0.771331
Ccdc74a	302.482	-0.0694046	0.136555	-0.508255	0.611274	0.796725
Ccdc77	346.435	-0.0561082	0.10671	-0.525801	0.599026	0.788783
Ccdc8	48.2188	0.502569	0.262791	1.91243	0.0558215	0.228198
Ccdc80	291.131	-0.0799716	0.134263	-0.595633	0.551421	0.760651
Ccdc82	1067.12	-0.127429	0.133931	-0.951449	0.341376	0.59477
Ccdc84	293.843	-0.338755	0.108929	-3.10987	0.0018717	0.0286955
Ccdc85a	6184.71	0.0785261	0.143022	0.549049	0.582971	0.779327
Ccdc85b	143.324	0.503778	0.712126	0.707429	0.4793	0.706984
Ccdc85c	351.746	-0.610239	0.165528	-3.68661	0.000227258	0.0071359
Ccdc86	136.23	0.174534	0.147326	1.18468	0.236143	0.494743
Ccdc87	48.4135	0.0564296	0.241528	0.233636	0.815268	0.912779
Ccdc88a	9243.15	0.226353	0.157917	1.43336	0.151754	0.389818
Ccdc88c	1454.52	-0.257944	0.12731	-2.0261	0.0427541	0.195394
Ccdc9	1041.92	-0.257714	0.0978301	-2.6343	0.00843115	0.0742695
Ccdc90b	522.695	0.0845094	0.145871	0.579343	0.562357	0.766222
Ccdc91	1946.43	-0.112638	0.087198	-1.29175	0.196442	0.448376
Ccdc92	1303.45	-0.0792905	0.10788	-0.734991	0.462345	0.69475
Ccdc92b	934.289	-0.098255	0.0751333	-1.30774	0.190961	0.440863
Ccdc93	1662.42	-0.122879	0.0781932	-1.57148	0.116072	0.339218
Ccdc94	196.079	-0.26277	0.184358	-1.42533	0.154063	0.39205
Ccdc96	54.019	-0.21285	0.281526	-0.756058	0.449615	0.68483
Ccdc97	643.104	0.0167104	0.101878	0.164024	0.869712	0.939311
Cchcr1	135.245	-0.298856	0.188165	-1.58827	0.112226	0.33165
Cck	3898.35	-0.141113	0.419077	-0.336724	0.736325	0.872498
Cckbr	1863.16	-0.272126	0.116007	-2.34578	0.0189873	0.121595
Ccl25	1034.16	-0.254912	0.0717864	-3.55097	0.000383809	0.00989685
Ccl27a	2926.05	0.21586	0.068385	3.15655	0.00159649	0.02602
Ccl28	90.3287	-0.494773	0.857818	-0.57678	0.564088	0.767047
Ccm2	1284.28	-0.200383	0.132344	-1.51411	0.129997	0.360734
Ccm2l	63.7057	-0.0857008	0.212604	-0.403101	0.686874	0.841517
Ccna2	50.556	-0.0826625	0.277331	-0.298065	0.765654	0.8874
Ccnb1	140.113	-0.820107	0.589309	-1.39164	0.164031	0.405841
Ccnc	2018.64	0.199636	0.151661	1.31633	0.188063	0.437131
Ccnd1	1116.47	0.662469	0.0709032	9.34329	9.33825e-21	5.79111e-17
Ccnd2	2151.98	0.290542	0.0768375	3.78126	0.000156038	0.00559533
Ccnd3	403.968	0.529592	0.148735	3.56064	0.000369956	0.00966014
Ccndbp1	1182.21	0.183175	0.0836754	2.18911	0.0285888	0.155029
Ccne1	338.139	-0.0898368	0.109452	-0.820787	0.411768	0.654054
Ccne2	317.519	0.15108	0.188419	0.801833	0.422649	0.664485
Ccnf	141.03	0.0593993	0.176404	0.336724	0.736325	0.872498
Ccng1	3475.05	0.407105	0.126434	3.21991	0.00128232	0.0227209
Ccng2	1287.32	0.31057	0.090381	3.43623	0.000589864	0.0133125
Ccnh	2116.25	0.218696	0.133658	1.63624	0.101788	0.314833
Ccni	5847.96	0.235221	0.0795983	2.9551	0.00312568	0.0402155
Ccnj	357.637	0.110056	0.126554	0.869643	0.384496	0.630057
Ccnjl	176.635	0.00251948	0.142815	0.0176415	0.985925	0.995489
Ccnk	774.709	-0.184024	0.0945975	-1.94534	0.0517346	0.218759
Ccnl1	1656.75	0.254599	0.152953	1.66455	0.0960016	0.305388
Ccnl2	1875.01	0.158499	0.084945	1.8659	0.0620559	0.240675
Ccnt1	2756.5	0.0497802	0.0784248	0.634751	0.525591	0.742049
Ccnt2	4675.45	0.126677	0.0808037	1.56772	0.116948	0.340174
Ccny	8347.18	0.114744	0.103158	1.11231	0.266005	0.527458
Ccnyl1	1410.84	-0.100236	0.109524	-0.915195	0.360089	0.609385
Ccp110	2952.91	0.158844	0.0731188	2.17241	0.0298244	0.158695
Ccpg1os	166.792	0.258552	0.170012	1.52079	0.128314	0.35844
Ccr5	111.416	0.927957	0.1807	5.13534	2.81641e-07	4.47846e-05
Ccs	683.525	-0.250011	0.103837	-2.40773	0.0160521	0.109262
Ccsap	1543.64	0.14336	0.0764516	1.87517	0.0607689	0.23842
Ccser1	22306.6	0.0268804	0.176559	0.152246	0.878993	0.943754
Ccser2	6468.06	0.0293	0.0768688	0.381169	0.703078	0.852005
Cct2	3933.67	0.0739226	0.0674884	1.09534	0.273368	0.535586
Cct3	3311.25	0.0303685	0.0884494	0.343343	0.73134	0.869268
Cct4	3347.06	0.0795093	0.0699489	1.13668	0.255673	0.516974
Cct5	4026.78	0.00978081	0.108505	0.0901418	0.928175	0.967814
Cct7	5026.03	-0.00181839	0.0876345	-0.0207498	0.983445	0.994136
Cct8	5161.58	0.127074	0.0567493	2.23922	0.0251414	0.144902
Ccz1	1399.28	0.0699584	0.0834049	0.83878	0.401593	0.644696
Cd151	466.945	-0.211951	0.211978	-0.999873	0.317372	0.575122
Cd163	53.1714	0.255729	0.238275	1.07325	0.283159	0.54423
Cd164	1887.92	0.208912	0.0983297	2.12461	0.0336193	0.169298
Cd164l2	143.391	-0.104384	0.196906	-0.530117	0.596031	0.78808
Cd180	101.546	-0.287618	0.245755	-1.17035	0.241861	0.50164
Cd200	2439.27	0.080094	0.088744	0.902528	0.366776	0.615013
Cd200r1	81.9251	0.428409	0.241788	1.77184	0.0764215	0.271458
Cd200r4	48.59	0.378933	0.301184	1.25814	0.20834	0.462865
Cd24a	133.847	0.380778	0.201893	1.88604	0.0592895	0.235671
Cd274	50.9176	-0.621771	0.294618	-2.11043	0.034821	0.17331
Cd276	366.917	-0.147898	0.164126	-0.901128	0.36752	0.615329
Cd2ap	2743.05	-0.120897	0.168096	-0.719215	0.472008	0.701845
Cd2bp2	1929.27	0.0452315	0.0698811	0.647265	0.517461	0.736539
Cd302	469.382	0.158963	0.11843	1.34225	0.179516	0.426049
Cd320	456.174	-0.189103	0.128012	-1.47723	0.139615	0.37328
Cd33	236.696	0.149785	0.15906	0.941689	0.346352	0.598135
Cd34	2472.35	-0.0285461	0.0724961	-0.39376	0.693758	0.846168
Cd37	57.965	-0.170417	0.289517	-0.588625	0.556113	0.762507
Cd38	125.781	0.297687	0.211381	1.4083	0.159043	0.399959
Cd3eap	401.693	0.190023	0.103	1.84488	0.0650551	0.246903
Cd4	214.568	-0.459149	0.547549	-0.838553	0.40172	0.644696
Cd44	89.7175	0.405822	0.249986	1.62338	0.104509	0.319463
Cd46	1327.73	-0.0374929	0.167436	-0.223924	0.822817	0.916515
Cd47	6274.78	0.158863	0.0874141	1.81736	0.0691628	0.256272
Cd52	31.3875	0.545765	0.384405	1.41977	0.155676	0.394937
Cd53	252.838	-0.0492009	0.172527	-0.285177	0.775508	0.892183
Cd55	277.529	0.447571	0.113876	3.93035	8.48226e-05	0.00362777
Cd59a	172.163	-0.422374	0.184519	-2.28906	0.0220758	0.133499
Cd59b	64.859	-0.177777	0.243877	-0.72896	0.466026	0.697072
Cd6	93.2952	0.95371	0.223229	4.27234	1.93434e-05	0.00118185
Cd63	588.96	-0.114206	0.192458	-0.593405	0.55291	0.761312
Cd68	151.759	-0.214873	0.255034	-0.842526	0.399494	0.643079
Cd81	6205.96	0.107131	0.0623018	1.71956	0.085513	0.288448
Cd82	330.962	0.307852	0.158181	1.94619	0.0516315	0.218487
Cd83	353.462	-0.131927	0.131487	-1.00335	0.315691	0.574292
Cd84	134.708	-0.0554866	0.203626	-0.272493	0.785243	0.897758
Cd86	89.0539	0.305174	0.20121	1.51669	0.129344	0.359896
Cd9	893.56	0.322066	0.151238	2.12953	0.0332105	0.168195
Cd93	210.993	0.0726978	0.175267	0.414783	0.678301	0.836695
Cd99l2	3121.33	-0.0743214	0.0703736	-1.0561	0.290923	0.550507
Cda	59.4553	-0.326378	0.220386	-1.48094	0.138623	0.372216
Cdadc1	1590.77	0.139769	0.0933399	1.49742	0.134285	0.366696
Cdan1	756.354	-0.119557	0.0791624	-1.51027	0.130975	0.362365
Cdc123	2533.94	-0.0765875	0.06684	-1.14583	0.251864	0.512796
Cdc14a	258.29	-0.177524	0.139452	-1.273	0.203017	0.457322
Cdc14b	985.702	-0.185295	0.095374	-1.94282	0.0520374	0.219382
Cdc16	1581.57	0.0768035	0.0668932	1.14815	0.250906	0.512114
Cdc23	1562.87	0.0310323	0.0607109	0.511149	0.609247	0.795336
Cdc25a	146.132	0.103661	0.175237	0.591548	0.554154	0.761481
Cdc25b	337.939	-0.167023	0.123203	-1.35567	0.175204	0.420887
Cdc26	664.025	0.0830462	0.138639	0.599009	0.549167	0.75909
Cdc27	4625.54	0.0914585	0.0931485	0.981857	0.32617	0.581952
Cdc34	735.818	0.100115	0.103634	0.966048	0.33402	0.587258
Cdc37	1595.07	0.0107194	0.127867	0.0838329	0.933189	0.970213
Cdc37l1	3832.31	0.151261	0.0950974	1.59059	0.111703	0.331131
Cdc40	2438.53	-0.0446728	0.0594998	-0.750806	0.452769	0.686852
Cdc42	9760.07	0.0670972	0.0791459	0.847766	0.396568	0.639781
Cdc42bpa	20192.7	0.0887373	0.0687663	1.29042	0.196906	0.448717
Cdc42bpb	5308.34	-0.184896	0.113298	-1.63195	0.10269	0.316358
Cdc42bpg	79.7991	0.165472	0.242358	0.682758	0.49476	0.718343
Cdc42ep1	296.911	0.0900624	0.107445	0.838218	0.401908	0.644712
Cdc42ep2	233.282	0.217514	0.14611	1.4887	0.136566	0.369751
Cdc42ep3	569.636	-0.106542	0.174141	-0.611816	0.54066	0.752868
Cdc42ep4	640.075	-0.0400891	0.112721	-0.35565	0.722102	0.864085
Cdc42se1	1154.78	0.125086	0.0888958	1.4071	0.159396	0.400347
Cdc42se2	5737.78	-0.121702	0.0727566	-1.67273	0.0943798	0.302763
Cdc45	60.2207	0.0598393	0.21653	0.276356	0.782275	0.896476
Cdc5l	2439.65	0.122551	0.0792162	1.54704	0.121853	0.347916
Cdc7	489.44	0.236974	0.102788	2.30546	0.0211406	0.129357
Cdc73	4109.4	0.28053	0.133071	2.10813	0.03502	0.173811
Cdca4	239.435	-0.0100728	0.15535	-0.0648393	0.948302	0.977973
Cdca7	78.1108	0.0282665	0.264948	0.106687	0.915037	0.961146
Cdh1	74.1239	0.435583	0.226013	1.92725	0.0539485	0.223862
Cdh10	8558.7	0.0419122	0.173226	0.241951	0.808818	0.910793
Cdh11	10391.6	0.0250857	0.123333	0.203397	0.838825	0.924138
Cdh12	8615.47	0.156588	0.123939	1.26343	0.206436	0.461504
Cdh13	5678.34	-0.284338	0.144645	-1.96576	0.0493259	0.213837
Cdh18	12838.5	-0.0487082	0.188424	-0.258503	0.796018	0.903957
Cdh19	843.006	0.404668	0.144426	2.8019	0.00508019	0.0535033
Cdh2	9809.5	-0.0283071	0.102986	-0.274863	0.783421	0.896834
Cdh20	3366.25	-0.0873101	0.167271	-0.521967	0.601693	0.79027
Cdh22	1129.89	-0.0790654	0.164185	-0.481564	0.630116	0.808538
Cdh23	63.6652	-0.491811	0.304244	-1.6165	0.105986	0.320934
Cdh24	178.555	0.398404	0.151283	2.6335	0.00845099	0.074286
Cdh4	1393.92	-0.466922	0.301515	-1.54859	0.121481	0.347494
Cdh5	285.722	-0.108041	0.129101	-0.836875	0.402663	0.645416
Cdh6	1735.35	-0.0058103	0.0707216	-0.0821573	0.934522	0.971004
Cdh7	2027.92	0.3494	0.112764	3.0985	0.00194503	0.0292456
Cdh8	6583.4	0.0668293	0.110389	0.6054	0.544913	0.755906
Cdh9	1934.66	0.105918	0.140796	0.752281	0.451882	0.686667
Cdhr1	252.475	-2.59813	1.07958	-2.4066	0.0161018	0.109415
Cdhr3	68.564	-0.980828	0.244101	-4.01812	5.86641e-05	0.00270487
Cdip1	5383	0.00439419	0.066516	0.0660623	0.947328	0.977843
Cdipt	2297.69	0.256951	0.0788748	3.25771	0.00112316	0.0206174
Cdk11b	1811.93	-0.0218967	0.069599	-0.314612	0.753057	0.880732
Cdk12	3430.5	-0.0108919	0.121445	-0.0896856	0.928537	0.968078
Cdk13	5410.45	0.0300938	0.110653	0.271964	0.785649	0.897758
Cdk14	15073.5	-0.123812	0.127507	-0.971023	0.331537	0.58549
Cdk16	4428.4	0.100694	0.120696	0.834275	0.404126	0.64713
Cdk17	12141.1	0.0767145	0.072002	1.06545	0.286672	0.547099
Cdk18	456.721	-0.284105	0.143593	-1.97854	0.0478679	0.20979
Cdk19	4950.63	0.0258732	0.0668279	0.387161	0.698637	0.849528
Cdk2	47.0219	0.188681	0.274293	0.687882	0.491527	0.716298
Cdk20	190.794	-0.00334113	0.148568	-0.0224889	0.982058	0.993477
Cdk2ap1	1030.53	-0.0676913	0.153325	-0.44149	0.658858	0.825885
Cdk2ap2	192.25	0.538748	0.140208	3.84248	0.000121796	0.00487303
Cdk4	677.331	0.0869593	0.0745117	1.16706	0.243188	0.50313
Cdk5	1885.51	0.125616	0.0710659	1.7676	0.0771285	0.272854
Cdk5r1	6222.32	0.346392	0.0742636	4.66435	3.09593e-06	0.000299991
Cdk5rap1	513.078	0.048436	0.129567	0.373829	0.708531	0.855771
Cdk5rap2	1411.17	-0.105209	0.108612	-0.968673	0.332709	0.586716
Cdk5rap3	416.876	-0.0781826	0.106995	-0.730712	0.464955	0.696124
Cdk6	326.4	0.327267	0.126541	2.58625	0.00970256	0.0800139
Cdk7	3101.17	0.167784	0.0927297	1.80939	0.0703904	0.25922
Cdk8	2895.03	-0.167541	0.0861759	-1.94417	0.0518745	0.219141
Cdk9	1242.45	-0.00211244	0.0920884	-0.0229392	0.981699	0.993477
Cdkal1	3622.58	-0.16908	0.136263	-1.24084	0.214664	0.470237
Cdkl1	780.618	-0.0472321	0.0807199	-0.585136	0.558457	0.763844
Cdkl2	1857.52	0.177412	0.104525	1.69732	0.0896353	0.295294
Cdkl3	649.732	-0.276463	0.0865192	-3.19539	0.00139643	0.0240292
Cdkl4	515.281	0.155357	0.120343	1.29096	0.196719	0.448595
Cdkl5	17403.6	0.0484784	0.0870277	0.557046	0.577496	0.775266
Cdkn1a	211.23	0.483896	0.248358	1.94838	0.0513696	0.217897
Cdkn1b	1340.62	0.509133	0.296156	1.71914	0.0855891	0.288448
Cdkn1c	79.2342	-0.248688	0.202053	-1.23081	0.218396	0.475474
Cdkn2aip	641.347	0.326855	0.138286	2.36362	0.0180972	0.117754
Cdkn2aipnl	837.193	-0.0647018	0.111599	-0.579772	0.562069	0.766165
Cdkn2c	68.6205	0.50077	0.230896	2.16881	0.0300972	0.159392
Cdkn2d	768.853	0.133557	0.0793066	1.68406	0.0921706	0.298562
Cdnf	61.7146	0.0272933	0.213023	0.128124	0.898051	0.952815
Cdo1	585.075	0.100019	0.122943	0.81354	0.415909	0.657806
Cdon	1136.95	-0.29713	0.117019	-2.53916	0.0111119	0.0877415
Cdpf1	172.945	0.148284	0.144914	1.02326	0.306185	0.564785
Cdr2	312.676	-0.133842	0.130867	-1.02274	0.306432	0.564951
Cdr2l	685.723	-0.117255	0.0924299	-1.26858	0.204591	0.459283
Cds1	3551.95	0.0220315	0.085721	0.257014	0.797168	0.904728
Cds2	17150.6	-0.0488437	0.0837169	-0.583439	0.559598	0.764623
Cdv3	2887.88	0.101549	0.0795369	1.27676	0.201687	0.455735
Cdyl	2100.36	-0.12243	0.0836983	-1.46275	0.143536	0.377817
Cdyl2	1199.49	0.0245064	0.144464	0.169636	0.865296	0.937364
Ceacam1	57.3216	0.128545	0.216795	0.592934	0.553226	0.761312
Cebpa	81.2833	-0.0458901	0.220572	-0.20805	0.83519	0.922263
Cebpg	1297.61	0.236786	0.141545	1.67287	0.0943536	0.302763
Cebpz	1524.88	0.278567	0.0773666	3.60061	0.000317468	0.00867302
Cebpzos	423.918	0.265145	0.140491	1.88727	0.059124	0.235339
Cecr2	307.515	-0.197645	0.17519	-1.12817	0.259246	0.520128
Cecr5	1630.63	-0.162306	0.0675582	-2.40246	0.0162852	0.109894
Cecr6	1654.82	0.327819	0.0859591	3.81366	0.000136922	0.00520933
Celf1	11796.1	-0.0352553	0.0736554	-0.478653	0.632186	0.809638
Celf2	141560	-0.239852	0.148116	-1.61935	0.105372	0.32071
Celf3	1928.38	-0.246503	0.0792113	-3.11197	0.00185843	0.0285275
Celf4	17206.4	-0.233687	0.121954	-1.91619	0.0553411	0.227289
Celf5	3884.25	-0.0416635	0.0886672	-0.469886	0.638437	0.81416
Celf6	471.112	-0.241104	0.11781	-2.04655	0.0407028	0.189931
Celsr1	164.491	-0.580702	0.197443	-2.94112	0.0032703	0.041474
Celsr2	5824.43	0.165209	0.148567	1.11202	0.266132	0.527458
Celsr3	2452.94	-0.391123	0.114232	-3.42392	0.000617243	0.0136655
Cemip	1921.17	-0.143762	0.118391	-1.2143	0.224634	0.482698
Cend1	5896.09	0.0114372	0.121323	0.0942707	0.924894	0.966291
Cenpa	44.6915	0.900943	0.25817	3.48973	0.000483504	0.0115994
Cenpc1	1620.28	0.192277	0.135834	1.41553	0.156913	0.397335
Cenpe	75.5219	0.517776	0.272073	1.90308	0.0570303	0.231084
Cenpf	37.5266	0.615611	0.299184	2.05764	0.0396252	0.187091
Cenpj	142.408	0.0263026	0.197735	0.13302	0.894178	0.950586
Cenpk	54.4998	0.238372	0.26359	0.904329	0.365821	0.614142
Cenpo	224.442	-0.23265	0.140196	-1.65946	0.0970227	0.307061
Cenpp	215.026	-0.0860723	0.175125	-0.491491	0.623079	0.803881
Cenpq	126.732	0.383815	0.219495	1.74863	0.0803557	0.27894
Cenpt	343.538	-0.168953	0.126587	-1.33468	0.181981	0.428924
Cenpu	132.228	-0.122997	0.186163	-0.660696	0.508808	0.730156
Cenpv	550.915	-0.00273582	0.123059	-0.0222318	0.982263	0.993477
Cenpw	117.111	0.399895	0.258756	1.54545	0.122238	0.348148
Cep104	929.531	-0.0289728	0.100246	-0.289018	0.772568	0.890567
Cep112	1976.45	-0.540645	0.362048	-1.4933	0.13536	0.36834
Cep120	2003	-0.0686086	0.0760469	-0.902188	0.366957	0.615093
Cep126	1443.79	0.150917	0.150318	1.00399	0.315386	0.574056
Cep128	669.158	-0.040626	0.125228	-0.324416	0.745623	0.877014
Cep131	620.469	-0.389459	0.111768	-3.48453	0.000493004	0.0117365
Cep135	647.953	-0.0880892	0.0893971	-0.985371	0.324442	0.580829
Cep152	300.542	-0.175126	0.152685	-1.14697	0.251393	0.512411
Cep162	1190.57	-0.055912	0.0920526	-0.607391	0.543591	0.755268
Cep164	920.5	-0.362929	0.0961912	-3.773	0.000161296	0.00570431
Cep170	6378.36	0.0712816	0.107789	0.661308	0.508415	0.730099
Cep170b	4979.46	-0.00524206	0.124804	-0.0420024	0.966497	0.986541
Cep19	1716.45	0.181626	0.0860639	2.11036	0.0348275	0.17331
Cep192	752.489	-0.139053	0.0917515	-1.51554	0.129636	0.360406
Cep250	1192.88	-0.200765	0.0666575	-3.01189	0.00259628	0.035582
Cep290	2097.27	0.200301	0.105424	1.89995	0.0574397	0.231909
Cep295	2321.92	-0.0134268	0.0817219	-0.164299	0.869496	0.939311
Cep350	5040.16	-0.0141144	0.0687989	-0.205155	0.837451	0.923609
Cep41	232.677	0.201119	0.124002	1.6219	0.104824	0.320055
Cep44	665.025	0.00486022	0.147084	0.0330438	0.97364	0.989413
Cep57	673.533	0.0688815	0.13532	0.509027	0.610733	0.796271
Cep57l1	541.055	-0.138677	0.128557	-1.07872	0.280713	0.54198
Cep63	1093.29	-0.155894	0.0760799	-2.04909	0.0404537	0.189267
Cep68	1157.75	0.0546758	0.0871629	0.627283	0.530474	0.745344
Cep70	1578.83	0.0249015	0.120561	0.206547	0.836363	0.922902
Cep72	51.0977	-0.487403	0.28459	-1.71265	0.0867772	0.290264
Cep76	350.125	0.203773	0.137204	1.48518	0.137497	0.371056
Cep78	718.316	-0.0304673	0.0929374	-0.327826	0.743044	0.87546
Cep83	3072.64	0.165346	0.0889933	1.85797	0.0631739	0.242911
Cep85	961.237	-0.12986	0.100768	-1.28871	0.197498	0.449864
Cep85l	2314.2	-0.0608058	0.162355	-0.374523	0.708015	0.855398
Cep89	728.572	-0.273846	0.119711	-2.28757	0.0221628	0.133764
Cep95	768.432	-0.0558949	0.116648	-0.479175	0.631814	0.809399
Cep97	1419.88	0.0181984	0.0911571	0.199638	0.841764	0.925567
Cept1	2120.76	0.229065	0.127191	1.80095	0.0717109	0.262137
Cercam	136.009	-0.112155	0.192428	-0.58284	0.560001	0.764776
Cerk	2013.85	-0.0229861	0.07026	-0.327158	0.743548	0.875761
Cerkl	284.965	0.0385551	0.154988	0.248761	0.803546	0.907343
Cers1	1384.06	-0.377248	0.101891	-3.70248	0.000213504	0.00684262
Cers2	995.271	0.109499	0.0836753	1.30862	0.190664	0.440702
Cers4	2620.62	-0.150932	0.0622146	-2.42599	0.0152665	0.106386
Cers5	1956.29	-0.257007	0.0608772	-4.22172	2.42442e-05	0.00143191
Cers6	6099.31	-0.0528011	0.121242	-0.435501	0.663199	0.828281
Cetn2	958.235	0.323358	0.134758	2.39955	0.0164151	0.110239
Cetn3	2318.44	0.227357	0.150753	1.50814	0.131518	0.363138
Cetn4	213.585	0.21895	0.178235	1.22843	0.219285	0.476572
Cfap100	205.207	0.209122	0.150869	1.38612	0.165711	0.407718
Cfap20	1263.39	-0.0967001	0.0958574	-1.00879	0.313075	0.572661
Cfap206	77.4624	-0.304974	0.215517	-1.41508	0.157045	0.397435
Cfap36	3336.41	0.119599	0.0601798	1.98737	0.0468815	0.20754
Cfap43	52.5699	-0.197748	0.273935	-0.721878	0.47037	0.700949
Cfap44	168.184	-0.180948	0.161441	-1.12083	0.262361	0.523406
Cfap45	124.809	-0.138189	0.177622	-0.777995	0.436572	0.675837
Cfap46	213.6	-0.566457	0.179906	-3.14863	0.00164038	0.026427
Cfap54	992.761	-0.0895974	0.104782	-0.855088	0.392503	0.636127
Cfap61	159.795	0.111994	0.181785	0.616078	0.537843	0.749957
Cfap69	1083.68	-0.0694632	0.166357	-0.417555	0.676272	0.835447
Cfap70	101.633	-0.619029	0.201813	-3.06734	0.00215971	0.03144
Cfap74	552.978	-0.259469	0.119908	-2.1639	0.0304717	0.160479
Cfap97	1397.76	0.115921	0.0832253	1.39286	0.163663	0.405333
Cfap99	128.42	-0.637845	0.177792	-3.58758	0.000333756	0.00896319
Cfdp1	2200.17	-0.00096237	0.0759301	-0.0126744	0.989888	0.996479
Cfh	1249.8	0.0339261	0.111733	0.303636	0.761405	0.885486
Cfl1	13549	0.126808	0.0783235	1.61903	0.105442	0.32071
Cfl2	2011.17	0.306919	0.120134	2.5548	0.0106248	0.0851835
Cflar	872.849	0.255434	0.125247	2.03943	0.0414068	0.192413
Cfp	249.823	-0.24333	0.125443	-1.93976	0.0524088	0.220124
Cftr	78.5201	0.313069	0.233462	1.34099	0.179924	0.426448
Cggbp1	2092.58	0.367982	0.119388	3.08223	0.00205455	0.0304781
Cgn	139.192	-0.0729334	0.143985	-0.506536	0.612481	0.797426
Cgnl1	513.111	-0.138227	0.0899805	-1.53619	0.124492	0.351726
Cgref1	287.179	-0.533188	0.207627	-2.56801	0.0102285	0.0831351
Cgrrf1	716.902	0.126415	0.0834326	1.51518	0.129727	0.36044
CH25-588N10.2	502.884	0.17822	0.132773	1.34229	0.179501	0.426049
Chac1	154.055	-0.0501168	0.187324	-0.267541	0.789053	0.899524
Chac2	369.154	0.28949	0.168387	1.71919	0.0855792	0.288448
Chadl	202.034	0.0456462	0.198707	0.229716	0.818313	0.914784
Chaf1a	137.06	-0.2517	0.211047	-1.19263	0.233014	0.491259
Champ1	1150.43	0.172317	0.0719592	2.39465	0.0166363	0.111026
Chchd1	592.741	0.252237	0.107568	2.3449	0.0190323	0.121679
Chchd10	1609.58	0.0647938	0.154194	0.420211	0.674332	0.834288
Chchd3	4578.75	-0.0741463	0.11558	-0.641515	0.521188	0.739215
Chchd4	919.638	-0.0155335	0.0966614	-0.160701	0.872329	0.94049
Chchd5	150.251	0.0462732	0.170132	0.271984	0.785634	0.897758
Chchd6	3816.63	-0.410899	0.137678	-2.98448	0.00284061	0.0379656
Chchd7	806.582	-0.0287063	0.113463	-0.253001	0.800268	0.906459
Chd1	5869.8	0.00573804	0.109338	0.05248	0.958146	0.98248
Chd1l	400.239	-0.0839721	0.111739	-0.751499	0.452352	0.686667
Chd2	6888.53	-0.0223537	0.0559562	-0.399485	0.689536	0.843182
Chd3	19976.4	-0.0558463	0.0945583	-0.590602	0.554787	0.76163
Chd3os	3017.6	0.264154	0.0768948	3.43527	0.000591971	0.0133125
Chd4	7915.41	-0.0734069	0.0759711	-0.966247	0.33392	0.587258
Chd5	8737.62	0.00348142	0.124981	0.0278556	0.977777	0.992014
Chd6	7386.28	-0.132712	0.0772016	-1.71903	0.0856086	0.288448
Chd7	1001.06	-0.21187	0.166051	-1.27594	0.201978	0.45609
Chd8	5411.54	-0.067878	0.0541095	-1.25446	0.209676	0.464663
Chd9	12324.7	0.120117	0.0686101	1.75072	0.0799938	0.278128
Chdh	155.104	-0.0655802	0.238794	-0.274631	0.7836	0.896834
Chek1	58.0885	0.242254	0.262162	0.924061	0.355455	0.605009
Chek2	48.0671	0.0992774	0.294598	0.336993	0.736122	0.872498
Cherp	814.272	-0.0997956	0.121947	-0.818353	0.413155	0.654955
Chfr	2034.44	-0.078392	0.0755005	-1.0383	0.299131	0.558754
Chga	2900.59	0.22051	0.0814384	2.7077	0.00677517	0.0644915
Chgb	12398.6	0.133188	0.0919039	1.44921	0.147279	0.383681
Chic1	2916.16	0.0640127	0.113328	0.564842	0.572181	0.771981
Chic2	1210.24	0.0352932	0.169987	0.207624	0.835523	0.922548
Chid1	2074.87	-0.193381	0.0965281	-2.00336	0.0451384	0.202112
Chil1	149.91	-0.249015	0.203093	-1.22611	0.220157	0.477309
Chka	3302.57	-0.0330937	0.0678668	-0.487627	0.625814	0.806103
Chkb	427.113	-0.131187	0.127089	-1.03224	0.301959	0.561498
Chl1	9029.8	0.150413	0.10854	1.38579	0.165812	0.407725
Chm	4566.34	0.231687	0.136937	1.69193	0.0906596	0.296297
Chmp1a	1735.91	0.170968	0.061856	2.76397	0.00571035	0.0575349
Chmp2a	1739.36	-0.091978	0.0812568	-1.13194	0.257659	0.518792
Chmp2b	1513.49	0.165388	0.0709395	2.3314	0.0197324	0.124423
Chmp3	4515.58	0.0250094	0.0758631	0.329665	0.741653	0.875071
Chmp4b	3949.68	-0.135468	0.116379	-1.16403	0.244411	0.504649
Chmp5	2586.76	0.16938	0.0931279	1.81879	0.0689439	0.255871
Chmp6	514.816	0.10467	0.118753	0.881403	0.3781	0.624335
Chmp7	2029.2	-0.0296586	0.101552	-0.292053	0.770246	0.889728
Chn1	31232.9	0.143077	0.0809199	1.76813	0.0770397	0.272695
Chn2	1992.09	-0.17707	0.126969	-1.3946	0.163138	0.405279
Chordc1	2816.36	0.343497	0.129073	2.66125	0.00778507	0.0710306
Chp1	4150.07	0.0681968	0.0554095	1.23078	0.218406	0.475474
Chpf	993.955	-0.00361181	0.139942	-0.0258093	0.979409	0.992614
Chpf2	1800.41	-0.0508781	0.105005	-0.484531	0.628009	0.807319
Chpt1	2951.91	0.370301	0.252217	1.46818	0.142055	0.376046
Chrac1	313.562	-0.26487	0.138712	-1.9095	0.0561983	0.228834
Chrd	670.536	0.231744	0.116972	1.98119	0.0475702	0.209373
Chrdl1	634.349	0.229298	0.0951973	2.40866	0.0160114	0.109199
Chrm1	4051	0.015266	0.0901499	0.16934	0.865529	0.937364
Chrm2	2139.02	-0.171777	0.370488	-0.463649	0.642899	0.816886
Chrm3	14685.5	-0.268818	0.101321	-2.65315	0.00797452	0.0718808
Chrm4	325.926	-0.0669338	0.209763	-0.319093	0.749656	0.87894
Chrna4	1085.92	-0.0612819	0.147973	-0.414141	0.678771	0.836799
Chrna5	141.079	0.40036	0.194002	2.06368	0.0390477	0.185769
Chrna7	1453.87	-0.345587	0.131318	-2.63168	0.0084963	0.0743346
Chrnb2	1416.41	0.00126662	0.0971789	0.0130339	0.989601	0.996408
Chrnb3	71.4847	0.570147	0.224623	2.53824	0.0111411	0.0877912
Chst1	3030.8	0.171463	0.103388	1.65844	0.0972288	0.307189
Chst10	1580.99	0.0361571	0.0905113	0.399476	0.689542	0.843182
Chst11	2653.76	-0.191853	0.115242	-1.66479	0.0959551	0.305318
Chst12	296.144	-0.031969	0.118159	-0.270559	0.78673	0.898297
Chst2	3579.52	0.290801	0.0768553	3.78374	0.000154488	0.00559533
Chst3	82.6809	0.346069	0.226342	1.52896	0.126274	0.354659
Chst7	42.9153	0.47755	0.284991	1.67567	0.0938038	0.301944
Chst8	444.195	-0.480848	0.161077	-2.98521	0.00283388	0.0379166
Chst9	102.501	-0.404032	0.318762	-1.2675	0.204975	0.459488
Chsy1	1114.06	-0.116891	0.143796	-0.812894	0.416279	0.658171
Chsy3	14147	-0.207175	0.174515	-1.18714	0.235171	0.493959
Chtf8	1244.59	0.309184	0.0767158	4.03026	5.57151e-05	0.00260768
Chtop	4459.48	0.0985046	0.0684135	1.43984	0.149913	0.387629
Chuk	2454.03	0.093355	0.091949	1.01529	0.309967	0.569011
Churc1	175.549	0.256952	0.157544	1.63098	0.102894	0.31658
Ciao1	1333.55	0.242942	0.0757792	3.20592	0.00134631	0.0235519
Ciapin1	1478.34	0.0488531	0.083946	0.581959	0.560595	0.764997
Ciart	447.679	-0.422476	0.202332	-2.08804	0.0367945	0.179458
Cib1	198.14	-0.0200569	0.193521	-0.103642	0.917453	0.962384
Cib2	358.273	-0.225032	0.123654	-1.81985	0.0687815	0.255725
Cic	2470.98	-0.0677004	0.126706	-0.534311	0.593127	0.785788
Cideb	42.7281	0.136057	0.254462	0.534685	0.592868	0.785707
Cinp	1359.55	0.127464	0.0787124	1.61936	0.10537	0.32071
Cipc	3883.46	0.00957498	0.0613684	0.156025	0.876014	0.94189
Cir1	1123.89	-0.00028819	0.120597	-0.00238969	0.998093	0.999316
Cirbp	1901.92	-0.369926	0.104322	-3.54599	0.000391138	0.0100233
Cisd1	2043.35	-0.0173422	0.132867	-0.130523	0.896152	0.951869
Cisd2	2131.53	0.150285	0.0862958	1.74151	0.0815947	0.281743
Cisd3	295.943	0.0503475	0.103737	0.485339	0.627436	0.807073
Cish	69.7464	0.11566	0.222695	0.519362	0.603508	0.791622
Cit	4085.64	0.00624885	0.0935908	0.0667678	0.946767	0.977666
Cited2	368.907	0.0717134	0.155594	0.460901	0.64487	0.817756
Cited4	92.7706	0.484363	0.223144	2.17063	0.0299591	0.159136
Ciz1	1038.08	-0.15052	0.0695049	-2.1656	0.0303416	0.160146
Ckap4	358.908	0.29598	0.132389	2.23568	0.0253726	0.145625
Ckap5	10534.2	0.100466	0.0632196	1.58916	0.112024	0.331496
Ckb	21907.6	-0.0629198	0.164623	-0.382206	0.702309	0.85152
Cklf	110.821	0.0563288	0.179455	0.313888	0.753606	0.881081
Ckmt1	4369.06	-0.117202	0.138075	-0.848828	0.395977	0.639243
Clasp1	7978.5	-0.145558	0.0842595	-1.7275	0.0840786	0.285718
Clasp2	19401.7	-0.0164011	0.0645341	-0.254146	0.799382	0.906035
Clasrp	1066.12	-0.385636	0.0814367	-4.73541	2.1861e-06	0.000224084
Clcc1	974.643	-0.214367	0.0845139	-2.53647	0.0111977	0.0880125
Clcn1	331.847	-0.345761	0.188215	-1.83705	0.0662022	0.249349
Clcn2	1124.58	-0.0964691	0.0934793	-1.03198	0.30208	0.56164
Clcn3	9533.17	0.161581	0.0722319	2.23698	0.0252877	0.145273
Clcn4	6883.75	0.227897	0.0627108	3.6341	0.000278952	0.00798768
Clcn5	833.128	0.0424953	0.084894	0.500569	0.616674	0.800148
Clcn6	2870.58	-0.167159	0.0921966	-1.81308	0.0698201	0.258007
Clcn7	1472.2	-0.162027	0.103233	-1.56953	0.116526	0.339706
Cldn10	599.389	0.139809	0.147634	0.946998	0.34364	0.596858
Cldn11	3116.76	0.633723	0.0855651	7.40632	1.29852e-13	2.68425e-10
Cldn12	1894.27	0.113934	0.083876	1.35836	0.174349	0.420139
Cldn14	53.4171	0.440286	0.407145	1.0814	0.279521	0.540604
Cldn34c1	328.562	-0.130441	0.193692	-0.673445	0.500664	0.723235
Cldn5	518.001	-0.147973	0.109069	-1.3567	0.174877	0.420652
Cldnd1	1306.53	0.0581416	0.0718627	0.809065	0.418478	0.660186
Clec11a	84.5349	0.200558	0.187106	1.07189	0.283768	0.544825
Clec14a	122.497	-0.438993	0.254039	-1.72805	0.0839786	0.285718
Clec16a	5164.02	-0.204574	0.121372	-1.68551	0.0918893	0.298117
Clec18a	320.518	0.135662	0.157602	0.860791	0.389353	0.634329
Clec2d	515.448	-0.122741	0.150468	-0.81573	0.414655	0.656344
Clec2l	853.407	-0.0529105	0.0991566	-0.533605	0.593615	0.786015
Clec5a	41.0008	1.00487	0.268683	3.74	0.00018402	0.00621908
Clgn	598.03	-0.020972	0.0921108	-0.227682	0.819894	0.915532
Clic1	186.126	0.0497587	0.125816	0.395489	0.692482	0.845527
Clic4	1716.63	0.0644658	0.0829225	0.777422	0.43691	0.676132
Clic5	318.768	0.321058	0.112276	2.85955	0.00424248	0.0476626
Clic6	52.8645	0.036167	0.280337	0.129013	0.897348	0.952354
Clint1	2385.93	0.0224086	0.0689655	0.324924	0.745238	0.876963
Clip1	6191.9	-0.0479836	0.0669616	-0.716584	0.473631	0.702685
Clip2	3944.57	-0.0326691	0.119182	-0.274111	0.783999	0.897128
Clip3	5421.81	0.0418774	0.11619	0.360422	0.718532	0.861891
Clip4	2235.7	-0.0999779	0.088313	-1.13209	0.257598	0.518792
Clk1	4370.39	0.119841	0.121076	0.989806	0.322269	0.578547
Clk2	1008.74	-0.18525	0.0975391	-1.89924	0.057533	0.232132
Clk3	1631.65	-0.0811532	0.0687482	-1.18044	0.237825	0.497033
Clk4	3011.85	0.0601763	0.0973751	0.617985	0.536585	0.749357
Clmn	2231.03	-0.194456	0.0604036	-3.21927	0.00128516	0.0227221
Clmp	1252.2	-0.0114891	0.0949096	-0.121053	0.903649	0.954868
Cln3	304.364	0.00824189	0.128944	0.0639184	0.949035	0.978296
Cln5	343.131	0.171995	0.157752	1.09029	0.275586	0.537181
Cln6	186.283	-0.493001	0.1756	-2.80751	0.00499255	0.0530234
Cln8	703.063	0.17773	0.078537	2.26302	0.0236347	0.139392
Clns1a	2225.07	0.0772639	0.0647598	1.19308	0.232836	0.491134
Clock	7314.56	0.171735	0.0770223	2.22968	0.0257687	0.146879
Clp1	240.836	0.34527	0.131305	2.62952	0.00855049	0.0745793
Clpb	2507.35	-0.133518	0.0926662	-1.44085	0.149628	0.387277
Clpp	742.451	-0.113757	0.155213	-0.73291	0.463613	0.695307
Clptm1	3349.56	0.0155982	0.108178	0.14419	0.88535	0.946694
Clptm1l	2216.56	0.0310295	0.0832806	0.37259	0.709454	0.856371
Clpx	1568.12	-0.00412261	0.0996575	-0.0413678	0.967003	0.986976
Clspn	96.303	0.268586	0.626217	0.428902	0.667995	0.830008
Clstn1	35300.5	-0.020013	0.148562	-0.134711	0.89284	0.949652
Clstn2	17297.3	-0.0536893	0.138621	-0.38731	0.698527	0.849528
Clstn3	11220.9	0.0292278	0.127463	0.229304	0.818633	0.914812
Clta	3813.27	-0.0415571	0.0986847	-0.42111	0.673675	0.833818
Cltb	3240.12	-0.0712024	0.0960338	-0.741431	0.458432	0.691776
Cltc	34064.2	0.117282	0.0691146	1.69692	0.089711	0.295294
Clu	10183.3	0.117158	0.104129	1.12512	0.26054	0.52152
Cluap1	1051.1	-0.373643	0.0711647	-5.25039	1.51774e-07	2.72819e-05
Cluh	2268.47	-0.28383	0.125204	-2.26695	0.0233933	0.138349
Clvs1	4690.97	-0.106631	0.0799627	-1.33351	0.182365	0.429115
Clvs2	2423.56	0.155142	0.112967	1.37334	0.169647	0.413304
Clybl	712.075	-0.207628	0.0966851	-2.14746	0.0317565	0.163706
Cmas	2432.82	-0.0760408	0.0659776	-1.15252	0.249106	0.510518
Cmbl	197.006	-0.24316	0.156908	-1.5497	0.121213	0.346967
Cmc1	547.443	0.106988	0.0883868	1.21045	0.226106	0.484594
Cmc2	366.25	0.179656	0.156791	1.14583	0.251866	0.512796
Cmc4	231.089	0.294784	0.242935	1.21343	0.224966	0.483032
[truncated: 10,404 more rows]

## Sheet: DEG_Mef2cCKO_CS|SD
Gene	baseMean	log2FoldChange	lfcSE	stat	pvalue	padj
0610009O20Rik	1050.72	-0.0789372	0.120829	-0.653297	0.513565	0.993078
1810055G02Rik	568.295	0.0485052	0.0985735	0.492072	0.622669	0.993404
2410015M20Rik	1670.39	-0.027578	0.0672892	-0.409843	0.681921	0.993404
2510009E07Rik	2682.42	-0.0902581	0.0989833	-0.911851	0.361847	0.990874
2700062C07Rik	407.199	0.0403203	0.13316	0.302797	0.762045	0.995652
2810403A07Rik	2761.47	0.0108228	0.111086	0.0974271	0.922387	0.999941
2900055J20Rik	500.483	0.149813	0.176458	0.849002	0.39588	0.990874
3110021N24Rik	37.9272	0.999769	0.35116	2.84704	0.00441273	0.326465
3110082I17Rik	678.537	0.0375715	0.139995	0.268378	0.788409	0.999097
8030462N17Rik	6796.24	0.110033	0.133055	0.826972	0.408253	0.991769
9130011E15Rik	1728.81	0.031394	0.0848727	0.369895	0.71146	0.993404
9930104L06Rik	684.929	0.0941013	0.0875437	1.07491	0.282416	0.983043
9930111J21Rik2	110.48	-0.627133	0.372115	-1.68532	0.0919268	0.896095
A4galt	130.205	-0.025071	0.233253	-0.107484	0.914405	0.999728
Aaas	396.767	-0.16556	0.119499	-1.38544	0.165916	0.957367
Aacs	1431.05	-0.134939	0.117192	-1.15143	0.249554	0.980357
Aaed1	281.964	-0.107763	0.14825	-0.726904	0.467285	0.993078
Aagab	2561.19	-0.117334	0.0767712	-1.52836	0.126423	0.924359
Aak1	20364	0.0097734	0.0656052	0.148973	0.881575	0.999164
Aamdc	801.032	-0.0767132	0.108526	-0.706863	0.479652	0.993078
Aamp	3450.81	-0.0553087	0.0659349	-0.838838	0.40156	0.990874
Aar2	1309.77	-0.0519	0.0766631	-0.676987	0.498414	0.993078
Aard	90.282	-0.109136	0.256343	-0.42574	0.670297	0.993404
Aars	5004.97	0.0559496	0.0852381	0.656392	0.511572	0.993078
Aars2	780.742	0.12874	0.138115	0.932123	0.351273	0.990874
Aasdh	558.282	-0.0569986	0.112263	-0.507724	0.611647	0.993404
Aasdhppt	1769.76	0.0836965	0.119227	0.701991	0.482685	0.993078
Aass	185.964	-0.414411	0.333763	-1.24163	0.214372	0.971926
Aatf	1422.75	0.122163	0.0699682	1.74598	0.0808141	0.884807
Aatk	6119.95	-0.0230999	0.0921622	-0.250644	0.80209	0.999097
Abat	9344.84	0.0271022	0.111513	0.243041	0.807974	0.999097
Abca1	5138.37	-0.501638	0.526078	-0.953543	0.340315	0.985481
Abca17	131.961	-0.141345	0.340092	-0.415609	0.677696	0.993404
Abca2	7931.57	-0.15624	0.101961	-1.53234	0.125437	0.924359
Abca3	4099.83	-0.147154	0.113701	-1.29422	0.195591	0.968628
Abca4	227.533	-0.187754	0.162186	-1.15765	0.247008	0.980357
Abca5	4251.88	-0.0262256	0.0829684	-0.316092	0.751933	0.994993
Abca6	217.045	-0.0138498	0.168816	-0.0820412	0.934614	0.999941
Abca7	794.823	-0.178487	0.16788	-1.06318	0.287702	0.98345
Abca8a	388.315	0.315901	0.234121	1.34931	0.177238	0.965277
Abca8b	2326.46	-0.0918496	0.133753	-0.686708	0.492266	0.993078
Abca9	806.779	-0.049345	0.190293	-0.25931	0.795396	0.999097
Abcb10	1179.6	0.155006	0.134617	1.15146	0.249543	0.980357
Abcb1a	1085.18	0.0130055	0.134797	0.0964822	0.923138	0.999941
Abcb1b	395.134	-0.180907	0.260802	-0.693658	0.487896	0.993078
Abcb4	388.44	-0.283751	0.178875	-1.58631	0.112669	0.910389
Abcb7	3299.78	0.0198384	0.0742074	0.267337	0.78921	0.999097
Abcb8	1241.89	-0.0570332	0.088674	-0.643178	0.520108	0.993078
Abcb9	1393.9	-0.0853266	0.122136	-0.69862	0.48479	0.993078
Abcc1	1827.11	0.0269274	0.188491	0.142858	0.886402	0.999164
Abcc10	302.357	0.00670882	0.187261	0.0358261	0.971421	0.999941
Abcc12	86.1387	0.244267	0.257982	0.946839	0.343721	0.989047
Abcc3	208.868	-0.203391	0.381491	-0.533147	0.593932	0.993404
Abcc4	1049.41	0.130569	0.141306	0.924017	0.355477	0.990874
Abcc5	7570.82	0.0198387	0.0829503	0.239163	0.810979	0.999097
Abcc6	87.8682	-0.00459003	0.263994	-0.0173869	0.986128	0.999941
Abcc8	902.619	-0.201374	0.171011	-1.17755	0.238976	0.980357
Abcc9	449.155	0.00759554	0.202367	0.0375335	0.97006	0.999941
Abcd1	472.452	-0.108506	0.133594	-0.812208	0.416673	0.992754
Abcd2	2639.27	-0.339156	0.118937	-2.85155	0.00435062	0.325635
Abcd3	3974.31	-0.0634482	0.0975132	-0.650663	0.515264	0.993078
Abcd4	349.1	-0.158247	0.21265	-0.744169	0.456775	0.992754
Abce1	5298.63	0.169953	0.10819	1.57087	0.116212	0.912187
Abcf1	2712.22	0.120284	0.0536415	2.24236	0.0249382	0.675994
Abcf2	2904.44	-0.048664	0.0601609	-0.808897	0.418574	0.992754
Abcf3	1934.82	-0.020111	0.0759358	-0.264842	0.791131	0.999097
Abcg1	3299.92	-0.120487	0.0744083	-1.61926	0.105391	0.896095
Abcg2	975.453	-0.133123	0.0832064	-1.59991	0.109618	0.906215
Abcg4	1088.74	-0.120569	0.161367	-0.747172	0.454959	0.992754
Abhd10	1105.85	-0.0342676	0.0851711	-0.402338	0.687435	0.993404
Abhd11	580.3	-0.211816	0.106091	-1.99654	0.0458747	0.770988
Abhd12	8427.81	-0.0384958	0.16231	-0.237175	0.812521	0.999097
Abhd13	2277.13	0.012391	0.12245	0.101193	0.919398	0.999941
Abhd14a	939.629	-0.386174	0.141746	-2.72441	0.0064417	0.390746
Abhd14b	285.687	-0.0242251	0.166297	-0.145674	0.884179	0.999164
Abhd15	200.772	1.24891	0.419794	2.97506	0.00292934	0.271685
Abhd16a	2010.58	-0.0174994	0.0936318	-0.186896	0.851742	0.999164
Abhd17a	2173.04	0.114037	0.150824	0.756092	0.449594	0.992754
Abhd17b	1902.79	-0.0403941	0.115296	-0.350351	0.726075	0.993584
Abhd17c	1134.07	0.00542049	0.069041	0.0785112	0.937421	0.999941
Abhd2	7547.64	-0.0473152	0.14861	-0.318386	0.750192	0.994993
Abhd3	1736.79	-0.1456	0.0738944	-1.97038	0.048795	0.790368
Abhd4	1366.75	-0.314916	0.232784	-1.35282	0.176112	0.963684
Abhd5	859.995	-0.106631	0.092579	-1.15178	0.249409	0.980357
Abhd6	1307.18	-0.0168792	0.0743952	-0.226886	0.820512	0.999097
Abhd8	3819.77	-0.000412853	0.101213	-0.00407903	0.996745	0.999941
Abi1	7570.26	-0.0567076	0.125701	-0.451129	0.651897	0.993404
Abi2	16139.6	-0.00891002	0.116544	-0.076452	0.939059	0.999941
Abi3	171.333	-0.346091	0.324576	-1.06628	0.286295	0.98345
Abi3bp	3029.82	0.181285	0.164747	1.10038	0.271165	0.982515
Abl1	2451.95	-0.0700573	0.0735496	-0.952517	0.340835	0.985481
Abl2	5865.36	0.178443	0.100624	1.77336	0.0761697	0.877091
Ablim1	6685.01	-0.0224483	0.112709	-0.199171	0.842129	0.999097
Ablim2	6674.38	0.0123268	0.154713	0.0796753	0.936496	0.999941
Ablim3	1743.75	0.0953745	0.213361	0.44701	0.654868	0.993404
Abr	16153.4	-0.0498553	0.0787123	-0.633387	0.526481	0.993078
Abracl	458.37	0.0935467	0.149872	0.624177	0.532512	0.993078
Abt1	513.462	0.232519	0.165672	1.4035	0.160469	0.952232
Abtb1	865.426	-0.134364	0.150833	-0.890815	0.373028	0.990874
Abtb2	869.379	-0.0949125	0.14655	-0.647648	0.517213	0.993078
Acaa1a	1365.35	0.152269	0.166225	0.916041	0.359645	0.990874
Acaa2	460.998	-0.0941674	0.210354	-0.447662	0.654397	0.993404
Acaca	6386.63	0.0082708	0.0780079	0.106025	0.915562	0.999728
Acacb	119.846	-0.0363712	0.247362	-0.147036	0.883103	0.999164
Acad10	252.911	-0.155842	0.165067	-0.944112	0.345112	0.99038
Acad12	136.871	-0.278558	0.288257	-0.966354	0.333867	0.98345
Acad8	1050.18	-0.165078	0.116483	-1.41718	0.156429	0.946822
Acad9	1243.79	0.0518643	0.0999165	0.519077	0.603707	0.993404
Acadl	610.85	-0.185101	0.142261	-1.30113	0.193212	0.968628
Acadm	1063.48	-0.0555285	0.0903983	-0.614265	0.53904	0.993078
Acads	159.738	-0.322408	0.30016	-1.07412	0.282768	0.98345
Acadsb	2589.47	-0.192615	0.0840521	-2.29162	0.0219278	0.638049
Acadvl	1122.42	-0.217953	0.150884	-1.44451	0.148595	0.943382
Acan	182.724	0.207429	0.229489	0.903873	0.366063	0.990874
Acap2	11453	0.0824054	0.0794383	1.03735	0.299572	0.98345
Acap3	3463.72	0.153707	0.117672	1.30624	0.191472	0.968628
Acat1	3814.94	0.127225	0.0588394	2.16224	0.0305997	0.699693
Acat2	1361.4	-0.265568	0.130487	-2.03521	0.0418298	0.755503
Acat3	169.13	-0.376879	0.19956	-1.88855	0.0589522	0.808214
Acbd3	1561.41	0.0997099	0.0849527	1.17371	0.240511	0.980357
Acbd4	726.884	-0.0768273	0.0973681	-0.78904	0.430089	0.992754
Acbd5	3954.4	-0.0363132	0.0804797	-0.45121	0.651838	0.993404
Acbd6	3121.34	0.0380576	0.0691971	0.549988	0.582327	0.993404
Accs	130.682	-0.354642	0.268186	-1.32237	0.186044	0.968628
Acd	489.337	-0.0728065	0.10561	-0.689389	0.490579	0.993078
Ace	396.907	-0.33911	0.243824	-1.39079	0.164288	0.95692
Ace2	76.6076	0.0504604	0.255964	0.197139	0.843719	0.999164
Acer2	201.605	0.391963	0.258373	1.51704	0.129256	0.924359
Acer3	2498.83	0.0075405	0.110575	0.0681937	0.945631	0.999941
Ache	1138.82	-0.250065	0.217955	-1.14732	0.251248	0.980357
Acin1	4365.58	0.171565	0.0634456	2.70413	0.00684833	0.405795
Ackr1	768.11	-0.243219	0.144476	-1.68345	0.0922878	0.896095
Ackr2	121.561	-0.285241	0.191701	-1.48795	0.136764	0.934319
Ackr3	440.45	0.158993	0.153643	1.03482	0.300753	0.98345
Acly	6362.79	0.0948588	0.0881075	1.07663	0.281648	0.983043
Aco1	1638.74	-0.12495	0.0863564	-1.44691	0.147923	0.943382
Aco2	13841.1	-0.0496251	0.0944448	-0.52544	0.599277	0.993404
Acot1	309.112	0.0775604	0.327148	0.237081	0.812594	0.999097
Acot11	1178.86	-0.184396	0.158414	-1.16401	0.244418	0.980357
Acot13	1531.2	-0.0407786	0.0898373	-0.453916	0.649889	0.993404
Acot2	247.16	-0.0170092	0.240391	-0.0707565	0.943592	0.999941
Acot3	50.3236	-0.0856494	0.312365	-0.274197	0.783933	0.999097
Acot5	73.423	-0.486958	0.368264	-1.32231	0.186067	0.968628
Acot6	237.649	0.0307589	0.15699	0.195929	0.844666	0.999164
Acot7	5148.34	-0.147497	0.13292	-1.10967	0.26714	0.982515
Acot8	501.075	-0.000717866	0.100347	-0.00715382	0.994292	0.999941
Acot9	1113.45	-0.0785053	0.102057	-0.769232	0.441756	0.992754
Acox1	7345.85	-0.0542145	0.0914665	-0.592726	0.553365	0.993078
Acox3	1077.39	-0.342099	0.135413	-2.52633	0.011526	0.508694
Acoxl	1031.94	0.941614	0.448204	2.10086	0.0356531	0.720714
Acp1	2354.75	-0.0366196	0.139601	-0.262317	0.793077	0.999097
Acp2	2409.35	-0.148244	0.0758734	-1.95383	0.0507214	0.796847
Acp6	606.061	-0.0212409	0.114666	-0.185241	0.85304	0.999164
Acr	40.5218	-0.247363	0.499634	-0.495088	0.620538	0.993404
Acrbp	187.84	0.176522	0.174389	1.01223	0.311429	0.98345
Acsbg1	3791.64	-0.299767	0.148621	-2.01699	0.043697	0.76519
Acsf2	203.161	-0.121837	0.242208	-0.503026	0.614946	0.993404
Acsl1	2489.29	-0.00862808	0.0721459	-0.119592	0.904806	0.999728
Acsl3	7394.2	-0.034918	0.096789	-0.360764	0.718276	0.993404
Acsl4	6411.88	-0.254623	0.103923	-2.45011	0.0142814	0.536216
Acsl5	2860.38	0.187985	0.0994992	1.88931	0.0588503	0.808214
Acsl6	8141.23	-0.0780907	0.0786685	-0.992655	0.320878	0.98345
Acss1	1204.18	-0.247318	0.215735	-1.1464	0.251629	0.980357
Acss2	2045.15	-0.174902	0.0945327	-1.85017	0.064289	0.832098
Acss3	100.204	-0.055558	0.427187	-0.130056	0.896522	0.999728
Acta1	244.968	0.149636	0.218143	0.685956	0.492741	0.993078
Acta2	174.034	0.513466	0.372033	1.38016	0.167537	0.957667
Actb	60205.3	0.00511222	0.115579	0.0442315	0.96472	0.999941
Actg1	13826	0.131616	0.117439	1.12072	0.262408	0.980357
Actl6a	666.528	-0.00815482	0.08551	-0.0953669	0.924023	0.999941
Actl6b	1934.22	0.0331757	0.121017	0.274141	0.783976	0.999097
Actn1	3163.94	-0.00231075	0.128301	-0.0180104	0.985631	0.999941
Actn2	1121.39	-0.0787135	0.237106	-0.331976	0.739908	0.994993
Actn4	2933.59	-0.00651855	0.062737	-0.103903	0.917246	0.999816
Actr10	5245.55	0.0375324	0.113293	0.331288	0.740427	0.994993
Actr1a	6026.06	-0.0369944	0.0765744	-0.483117	0.629013	0.993404
Actr1b	7629.8	-0.0631913	0.079435	-0.795509	0.426317	0.992754
Actr2	14353.5	0.0701327	0.114078	0.61478	0.5387	0.993078
Actr3	8966.9	0.0700989	0.126861	0.552566	0.580561	0.993404
Actr3b	4402.99	-0.139011	0.0841458	-1.65202	0.0985295	0.896095
Actr5	377.165	0.0276117	0.139436	0.198024	0.843026	0.999164
Actr6	976.69	0.0283259	0.100912	0.2807	0.778941	0.998853
Actr8	1986.05	0.0138268	0.0870892	0.158766	0.873854	0.999164
Acvr1	2772.01	0.169906	0.136649	1.24338	0.213729	0.970683
Acvr1b	4630.44	-0.0637711	0.0773319	-0.824642	0.409575	0.991769
Acvr1c	3830.22	0.438772	0.339971	1.29062	0.196836	0.968628
Acvr2a	3477.68	-0.103632	0.113522	-0.912883	0.361304	0.990874
Acvr2b	253.718	-0.140877	0.230007	-0.612489	0.540214	0.993078
Acvrl1	367.06	0.127765	0.175344	0.728651	0.466215	0.993078
Acy1	299.893	0.0550052	0.261368	0.210452	0.833315	0.999097
Acyp1	733.801	-0.164205	0.136947	-1.19904	0.230512	0.980357
Acyp2	2559.93	-0.097577	0.0796293	-1.22539	0.220428	0.976807
Adal	802.832	0.097875	0.093746	1.04404	0.296465	0.98345
Adam10	5629.23	-0.117971	0.132008	-0.893663	0.371502	0.990874
Adam11	2169.14	-0.142976	0.0738948	-1.93486	0.0530073	0.799362
Adam12	743.259	0.203486	0.14526	1.40084	0.161262	0.952232
Adam15	1459.53	-0.193283	0.191773	-1.00788	0.313514	0.98345
Adam17	1182.86	-0.18494	0.124617	-1.48407	0.13779	0.934319
Adam18	159.452	-0.242187	0.23851	-1.01542	0.309908	0.98345
Adam19	1385.98	0.215437	0.233749	0.921662	0.356705	0.990874
Adam21	66.634	-0.100902	0.291457	-0.346198	0.729194	0.99411
Adam22	22594.7	-0.0207638	0.0769112	-0.269971	0.787182	0.999097
Adam23	10321.8	-0.106329	0.0804308	-1.322	0.18617	0.968628
Adam32	172.31	0.0424187	0.23617	0.17961	0.857458	0.999164
Adam33	91.6827	-0.262983	0.254533	-1.0332	0.301511	0.98345
Adam8	107.421	-0.660998	0.443294	-1.49111	0.135934	0.933878
Adam9	2651.95	-0.0155747	0.121746	-0.127928	0.898206	0.999728
Adamts1	503.506	0.61391	0.33923	1.80971	0.0703401	0.851734
Adamts10	644.132	-0.0375424	0.110836	-0.338721	0.73482	0.994774
Adamts12	116.28	0.22375	0.305814	0.731653	0.46438	0.993078
Adamts15	199.54	0.00648808	0.257911	0.0251562	0.97993	0.999941
Adamts16	528.755	-0.106521	0.253425	-0.420327	0.674247	0.993404
Adamts17	1328.82	0.10454	0.157184	0.665082	0.505998	0.993078
Adamts18	389.836	0.232562	0.367886	0.632158	0.527284	0.993078
Adamts19	527.736	0.331048	0.303896	1.08935	0.276001	0.982515
Adamts2	665.567	-0.236737	0.286765	-0.825543	0.409063	0.991769
Adamts20	1048.49	-0.127231	0.111287	-1.14326	0.25293	0.980357
Adamts3	2905.36	-0.0238455	0.104531	-0.228118	0.819554	0.999097
Adamts4	611.101	0.16363	0.207852	0.78724	0.431141	0.992754
Adamts5	219.283	0.191363	0.23597	0.810964	0.417386	0.992754
Adamts6	956.293	0.173692	0.136412	1.27329	0.202914	0.9688
Adamts8	81.2665	0.0180871	0.283406	0.0638205	0.949113	0.999941
Adamts9	407.263	-0.0256503	0.119244	-0.215108	0.829683	0.999097
Adamtsl1	1589.79	0.0172995	0.189262	0.0914054	0.92717	0.999941
Adamtsl2	241.666	-0.233838	0.154094	-1.5175	0.12914	0.924359
Adamtsl3	345.783	-0.277453	0.39056	-0.710399	0.477457	0.993078
Adamtsl4	142.318	-0.243697	0.288721	-0.844057	0.398638	0.990874
Adamtsl5	90.256	-0.0498346	0.216734	-0.229935	0.818142	0.999097
Adap1	4937.71	-0.167791	0.0833705	-2.01259	0.0441577	0.76519
Adap2	384.148	-0.279606	0.28005	-0.998414	0.318079	0.98345
Adar	6410.14	0.0272231	0.0768334	0.354313	0.723104	0.993404
Adarb1	8911.25	0.0970844	0.107615	0.902148	0.366978	0.990874
Adarb2	11919	0.0832064	0.177792	0.467999	0.639785	0.993404
Adat1	347.1	0.198397	0.137077	1.44734	0.147802	0.943382
Adat2	221.694	-0.118806	0.22424	-0.529816	0.596239	0.993404
Adck1	1766.84	-0.0893498	0.0967264	-0.923738	0.355623	0.990874
Adck2	434.758	-0.0249879	0.145698	-0.171504	0.863827	0.999164
Adck5	419.615	-0.00783861	0.101958	-0.0768811	0.938718	0.999941
Adcy1	30643.7	0.0896695	0.107491	0.834201	0.404168	0.990874
Adcy10	49.2414	-0.0884111	0.341115	-0.259183	0.795494	0.999097
Adcy2	14349.3	0.0752924	0.154258	0.488095	0.625483	0.993404
Adcy3	2069.85	-0.0250016	0.0974652	-0.256519	0.79755	0.999097
Adcy4	66.5263	0.0777985	0.366657	0.212183	0.831964	0.999097
Adcy5	10037.5	0.00449503	0.226187	0.019873	0.984145	0.999941
Adcy6	1391.42	-0.00399872	0.113109	-0.0353527	0.971798	0.999941
Adcy7	300.574	-0.171639	0.356736	-0.481136	0.63042	0.993404
Adcy8	2309.07	0.094671	0.335179	0.282449	0.777599	0.998853
Adcy9	6510.57	0.0456188	0.172786	0.26402	0.791765	0.999097
Adcyap1	684.331	-0.249395	0.212335	-1.17454	0.240179	0.980357
Adcyap1r1	6596.29	0.0547352	0.094665	0.578199	0.56313	0.993078
Add1	13113.5	0.107187	0.0618964	1.73172	0.0833232	0.888712
Add2	15725.6	-0.0258448	0.0745858	-0.34651	0.728959	0.99411
Add3	7673.07	-0.319871	0.149148	-2.14466	0.03198	0.700174
Adgb	100.86	-0.524126	0.602626	-0.869736	0.384445	0.990874
Adgra1	2430.64	-0.0339286	0.164381	-0.206402	0.836477	0.999097
Adgra2	501.029	0.517864	0.239382	2.16334	0.0305149	0.699693
Adgra3	866.385	-0.0474676	0.103381	-0.459154	0.646123	0.993404
Adgrb1	8976.37	0.177051	0.0990794	1.78696	0.0739438	0.86914
Adgrb2	8920.47	0.097082	0.13999	0.693493	0.488	0.993078
Adgrb3	45037.1	0.0530658	0.133094	0.39871	0.690107	0.993404
Adgrd1	259.689	0.631965	0.377869	1.67245	0.0944362	0.896095
Adgre1	591.402	-0.646412	0.731668	-0.883478	0.376978	0.990874
Adgre5	300.18	-0.225627	0.238153	-0.947402	0.343434	0.988698
Adgrf2	103.402	0.20801	0.23254	0.894516	0.371046	0.990874
Adgrf4	397.009	1.11646	0.795668	1.40318	0.160564	0.952232
Adgrf5	1173.25	-0.0189027	0.11347	-0.166587	0.867695	0.999164
Adgrg1	1320.06	0.328596	0.17173	1.91344	0.0556912	0.805809
Adgrg2	45.9547	-0.548047	0.329512	-1.66321	0.0962711	0.896095
Adgrg6	312.803	-0.194463	0.167768	-1.15912	0.246407	0.980357
Adgrl1	18741.6	-0.0351057	0.0987102	-0.355644	0.722107	0.993404
Adgrl2	5517.66	-0.0774618	0.0918858	-0.843022	0.399216	0.990874
Adgrl3	34184.5	0.276645	0.168569	1.64114	0.100768	0.896095
Adgrl4	1051.13	0.1297	0.188609	0.687663	0.491665	0.993078
Adgrv1	383.275	-0.535713	0.290668	-1.84304	0.0653233	0.833654
Adh5	1690.13	-0.118113	0.0771879	-1.53021	0.125965	0.924359
Adhfe1	556.471	0.205887	0.204208	1.00822	0.313348	0.98345
Adi1	466.627	0.10259	0.153054	0.670283	0.502677	0.993078
Adipor1	2169.58	-0.085192	0.131655	-0.647087	0.517575	0.993078
Adipor2	2449.18	0.0426189	0.123672	0.344614	0.730385	0.99411
Adk	4945.2	-0.143055	0.141146	-1.01352	0.31081	0.98345
Adnp2	1405.96	0.104808	0.0817372	1.28226	0.199753	0.9688
Ado	2326.22	0.0237044	0.145781	0.162603	0.870831	0.999164
Adora1	5976.99	0.154298	0.0948573	1.62663	0.103816	0.896095
Adora2a	1067.09	-0.263904	0.669495	-0.394184	0.693445	0.993404
Adora2b	91.2326	-0.174328	0.263147	-0.662474	0.507668	0.993078
Adpgk	712.393	-0.0233166	0.11885	-0.196185	0.844466	0.999164
Adprh	1512.69	0.0594129	0.0838026	0.708963	0.478348	0.993078
Adprhl2	510.886	0.00705838	0.128045	0.0551241	0.95604	0.999941
Adprm	607.159	-0.0658574	0.0991959	-0.663913	0.506746	0.993078
Adra1a	1586.13	-0.107996	0.0902166	-1.19707	0.231279	0.980357
Adra1b	510.598	0.02111	0.178981	0.117945	0.906111	0.999728
Adra1d	362.943	0.00495752	0.199912	0.0247985	0.980216	0.999941
Adra2a	300.368	0.148587	0.217435	0.683361	0.494379	0.993078
Adra2c	580.885	0.607549	0.179141	3.39146	0.000695208	0.115558
Adrb1	276.114	-0.0506831	0.166361	-0.304658	0.760627	0.99526
Adrb2	60.6784	-0.446462	0.313775	-1.42287	0.154773	0.946822
Adrbk1	4630.62	0.08733	0.101641	0.859202	0.390229	0.990874
Adrbk2	4125.55	0.059389	0.173187	0.342918	0.73166	0.99411
Adrm1	1092.84	0.028978	0.0853971	0.339332	0.73436	0.994774
Adsl	875.123	-0.0528012	0.0946216	-0.558025	0.576827	0.993404
Adss	3813.9	0.0404812	0.0951695	0.425359	0.670575	0.993404
Adssl1	395.32	0.0587685	0.139057	0.422622	0.672571	0.993404
Aebp1	420.572	0.250506	0.196789	1.27297	0.203029	0.9688
Aebp2	3308.6	0.0686801	0.132544	0.518166	0.604342	0.993404
Aen	585.041	0.0494039	0.0940591	0.525243	0.599414	0.993404
Aes	5451.54	-0.0936269	0.112287	-0.833815	0.404385	0.990874
Afap1	1185.94	0.0333193	0.0847631	0.393088	0.694255	0.993404
Afap1l1	808.835	-0.0788975	0.153807	-0.512963	0.607977	0.993404
Afap1l2	467.566	-0.010347	0.154631	-0.0669139	0.94665	0.999941
Aff1	1288.52	0.115866	0.376749	0.307541	0.758432	0.994993
Aff2	3708.73	0.0308952	0.199082	0.155188	0.876673	0.999164
Aff3	7088.43	0.150997	0.123796	1.21972	0.22257	0.976807
Aff4	14228.5	-0.0125852	0.0887984	-0.141727	0.887295	0.999164
Afg3l2	2796.1	-0.0114548	0.0647725	-0.176847	0.859628	0.999164
Aftph	5285	-0.0515918	0.0928071	-0.555903	0.578277	0.993404
Aga	337.49	-0.138056	0.12694	-1.08757	0.276786	0.982515
Agap1	8648.26	0.0850625	0.0787731	1.07984	0.280212	0.982637
Agap2	18572.9	-0.0531611	0.0837219	-0.634972	0.525447	0.993078
Agap3	4276.05	0.132733	0.105498	1.25815	0.208337	0.969662
Agbl1	159.064	-0.103524	0.192288	-0.53838	0.590315	0.993404
Agbl2	81.4968	0.264191	0.434641	0.607836	0.543296	0.993078
Agbl3	587.66	-0.156288	0.102281	-1.52803	0.126506	0.924359
Agbl4	10956.8	0.139673	0.188701	0.740182	0.45919	0.992754
Agbl5	315.289	-0.0669229	0.139721	-0.478977	0.631955	0.993404
Agfg1	7125.86	-0.0079155	0.0919714	-0.0860648	0.931415	0.999941
Agfg2	1269.83	-0.0134308	0.134508	-0.0998512	0.920462	0.999941
Aggf1	2466.67	0.107834	0.0750879	1.4361	0.150973	0.943624
Agk	1919.05	-0.00794648	0.0796776	-0.0997329	0.920556	0.999941
Agl	1978.03	-0.120143	0.15365	-0.781925	0.434258	0.992754
Agmo	791.73	0.00393496	0.159318	0.0246988	0.980295	0.999941
Ago1	2443.55	0.0247578	0.070488	0.351234	0.725413	0.993404
Ago2	4884.82	0.139422	0.0749639	1.85986	0.0629054	0.830326
Ago3	4343.78	0.0248484	0.0827998	0.300102	0.764099	0.995823
Ago4	763.82	0.0360306	0.122522	0.294075	0.768701	0.996395
Agpat1	4083.83	-0.0454636	0.112377	-0.404564	0.685798	0.993404
Agpat3	6998.82	-0.00533313	0.0690286	-0.0772598	0.938417	0.999941
Agpat4	2398.76	0.0467702	0.0967723	0.483302	0.628881	0.993404
Agpat5	3119.81	-0.0323244	0.0801775	-0.403161	0.68683	0.993404
Agpat9	237.222	0.149348	0.247335	0.60383	0.545957	0.993078
Agps	3941.78	-0.00101738	0.0726285	-0.014008	0.988824	0.999941
Agrn	4685.96	0.0816607	0.0784727	1.04062	0.29805	0.98345
Agrp	69.6682	0.615031	0.279303	2.20202	0.0276637	0.683669
Agt	143.274	-0.496444	0.389511	-1.27453	0.202475	0.9688
Agtpbp1	15304.4	0.0208737	0.0640399	0.325948	0.744464	0.994993
Agtr1a	37.2221	0.697712	0.399116	1.74814	0.0804392	0.883726
Agtrap	255.461	-0.261166	0.242116	-1.07868	0.28073	0.982637
Ahctf1	4701.48	0.0562344	0.0821589	0.68446	0.493685	0.993078
Ahcy	587.655	-0.112513	0.0992079	-1.13411	0.256749	0.980357
Ahcyl1	10769.2	0.0551774	0.0928355	0.594356	0.552274	0.993078
Ahcyl2	8156.34	0.0586979	0.0514152	1.14165	0.253601	0.980357
Ahdc1	2196.38	0.0748088	0.120977	0.618374	0.536329	0.993078
Ahi1	11411.3	0.0158488	0.0934106	0.169668	0.865271	0.999164
Ahnak	4084.54	0.181292	0.180943	1.00193	0.316378	0.98345
Ahnak2	80.083	-0.0395161	0.345534	-0.114362	0.90895	0.999728
Ahr	623.496	-0.0984968	0.0945359	-1.0419	0.297459	0.98345
Ahrr	58.4086	-0.179105	0.333444	-0.537136	0.591174	0.993404
Ahsa1	2989.37	0.176496	0.0969247	1.82096	0.0686132	0.844008
Ahsa2	1241.08	-0.0304151	0.143892	-0.211374	0.832595	0.999097
AI846148	1388.91	0.0984033	0.112075	0.878016	0.379935	0.990874
Aida	1558.19	-0.119021	0.0884267	-1.34598	0.178309	0.965277
Aif1	326.691	-0.529023	0.618164	-0.855798	0.39211	0.990874
Aif1l	248.076	0.122429	0.224728	0.544788	0.585899	0.993404
Aifm1	1178.98	0.0107832	0.0727907	0.148139	0.882233	0.999164
Aifm2	201.417	-0.161436	0.155428	-1.03865	0.298966	0.98345
Aifm3	2176.07	0.0274813	0.174236	0.157725	0.874674	0.999164
Aig1	4075.15	-0.044646	0.138178	-0.323106	0.746615	0.994993
Aim1	201.424	1.14011	0.183286	6.22042	4.95832e-10	6.39181e-07
Aim2	479.684	0.0358908	0.209688	0.171163	0.864096	0.999164
Aimp1	1882.27	0.0288885	0.0692623	0.417088	0.676614	0.993404
Aimp2	605.566	0.121234	0.123754	0.979636	0.327266	0.98345
Aip	1273.69	0.18235	0.120257	1.51634	0.129434	0.924359
Ajap1	2135.13	0.0342536	0.119223	0.287307	0.773877	0.997464
Ajuba	59.2315	-0.323327	0.296879	-1.08908	0.276117	0.982515
Ak1	3659.11	-0.108222	0.0797904	-1.35633	0.174995	0.963133
Ak2	799.657	-0.00042556	0.109052	-0.00390236	0.996886	0.999941
Ak3	2600.54	-0.145659	0.133455	-1.09145	0.275076	0.982515
Ak4	1589.69	0.173902	0.106024	1.64021	0.100961	0.896095
Ak5	5449.62	0.0275732	0.171796	0.1605	0.872487	0.999164
Ak6	1135.48	0.279518	0.0978848	2.85558	0.00429581	0.323424
Ak7	73.3704	-0.445682	0.326474	-1.36514	0.17221	0.959979
Ak8	74.769	-0.116936	0.288148	-0.405818	0.684877	0.993404
Ak9	85.0189	-0.480714	0.402005	-1.19579	0.231778	0.980357
Akain1	224.507	0.0139606	0.182166	0.0766365	0.938913	0.999941
Akap1	1788.05	-0.0688982	0.0716873	-0.961094	0.336505	0.984399
Akap10	2283.11	-0.100168	0.058414	-1.71479	0.0863831	0.896095
Akap11	20218.3	-0.012109	0.0944331	-0.128229	0.897968	0.999728
Akap12	1369.16	0.278793	0.0800408	3.48314	0.000495578	0.0880959
Akap13	3568.74	0.137031	0.19724	0.694742	0.487217	0.993078
Akap17b	1576.07	0.0908159	0.113878	0.797481	0.425172	0.992754
Akap5	5639.89	-0.02646	0.212503	-0.124516	0.900907	0.999728
Akap6	24691.6	0.0356319	0.0669118	0.53252	0.594366	0.993404
Akap7	2263.05	-0.0601821	0.118853	-0.506355	0.612607	0.993404
Akap8	3136.05	0.0911262	0.0834079	1.09254	0.274597	0.982515
Akap8l	3419.76	-0.0260564	0.0792263	-0.328885	0.742242	0.994993
Akap9	10620.6	0.0959548	0.103768	0.924708	0.355118	0.990874
Akip1	95.0197	-0.274816	0.280696	-0.979051	0.327555	0.98345
Akirin1	2270.09	-0.1217	0.132789	-0.916492	0.359409	0.990874
Akirin2	2372.42	-0.0433528	0.0874689	-0.495637	0.62015	0.993404
Akna	217.834	-0.155712	0.20327	-0.766037	0.443654	0.992754
Akr1a1	7301.09	-0.117612	0.0601671	-1.95476	0.0506111	0.796847
Akr1b10	385.118	-0.339149	0.220339	-1.53922	0.123751	0.924359
Akr1b3	855.485	-0.145377	0.106687	-1.36264	0.172996	0.961011
Akr1c18	265.424	-0.333366	0.411238	-0.810642	0.417572	0.992754
Akr1e1	1080.24	-0.103324	0.100863	-1.0244	0.305647	0.98345
Akr7a5	358.617	-0.169872	0.132928	-1.27792	0.201278	0.9688
Akt1	2622.03	-0.0430122	0.0893246	-0.481526	0.630142	0.993404
Akt1s1	831.879	0.157403	0.111728	1.4088	0.158893	0.949064
Akt2	3384.17	0.0409352	0.072304	0.566153	0.57129	0.993078
Akt3	19587.2	0.00892437	0.0901681	0.0989749	0.921158	0.999941
Aktip	3982.05	0.00936279	0.0745022	0.125671	0.899992	0.999728
Alad	402.805	0.0375122	0.158295	0.236977	0.812675	0.999097
Alas1	1819.02	-0.127985	0.0850215	-1.50533	0.13224	0.928515
Alas2	111.391	1.21487	0.567154	2.14204	0.03219	0.703072
Alcam	13268	0.0409687	0.192057	0.213316	0.831081	0.999097
Aldh16a1	211.368	-0.233899	0.174866	-1.33759	0.181032	0.965277
Aldh18a1	1030.5	0.210891	0.114314	1.84483	0.0650617	0.833654
Aldh1a1	1415.74	-0.541879	0.217143	-2.49549	0.0125782	0.514338
Aldh1a2	366.502	1.3056	0.363965	3.58716	0.000334299	0.0737249
Aldh1a3	62.6158	1.40036	0.447239	3.13113	0.00174138	0.198999
Aldh1a7	67.6136	-0.0752226	0.364769	-0.20622	0.836619	0.999097
Aldh1b1	402.239	-0.102737	0.129435	-0.793731	0.427352	0.992754
Aldh1l1	1985.9	-0.335782	0.220402	-1.5235	0.127634	0.924359
Aldh1l2	343.85	0.117439	0.625813	0.187658	0.851145	0.999164
Aldh2	1427.76	0.16271	0.158291	1.02791	0.30399	0.98345
Aldh3a2	1744.84	-0.0353053	0.124809	-0.282875	0.777273	0.998853
Aldh3b1	132.991	-0.3925	0.38301	-1.02478	0.305469	0.98345
Aldh5a1	3054.81	-0.0838056	0.10443	-0.802504	0.422262	0.992754
Aldh6a1	1689.29	-0.171165	0.109807	-1.55878	0.119049	0.91624
Aldh7a1	2466.19	0.0238947	0.13637	0.17522	0.860907	0.999164
Aldh9a1	560.407	0.0561697	0.139068	0.403901	0.686286	0.993404
Aldoa	42384.4	0.0562885	0.132115	0.426056	0.670067	0.993404
Aldoart1	50.755	0.576234	0.3886	1.48285	0.138115	0.934319
Aldob	50.0125	-0.0417936	0.387037	-0.107984	0.914009	0.999728
Aldoc	16447.9	-0.106998	0.105403	-1.01514	0.310039	0.98345
Alg1	725.405	0.00640862	0.0961392	0.0666598	0.946853	0.999941
Alg10b	1985.39	-0.0255777	0.0950344	-0.269141	0.787821	0.999097
Alg11	1798.55	0.0397508	0.0944999	0.420644	0.674015	0.993404
Alg12	531.16	0.0388617	0.112924	0.34414	0.730741	0.99411
Alg13	751.975	-0.055735	0.0880938	-0.632679	0.526943	0.993078
Alg14	584.189	-0.127301	0.107758	-1.18136	0.237458	0.980357
Alg2	4006.23	-0.0267196	0.0741927	-0.360138	0.718744	0.993404
Alg3	239.001	-0.236563	0.141092	-1.67666	0.0936098	0.896095
Alg5	512.931	-0.21031	0.114264	-1.84056	0.0656854	0.833654
Alg6	782.253	-0.0615437	0.109323	-0.562951	0.573468	0.993404
Alg8	372.48	-0.0329191	0.1394	-0.236149	0.813317	0.999097
Alg9	930.389	-0.0266852	0.0896418	-0.297687	0.765942	0.995823
Alk	1252.2	0.194125	0.158326	1.22611	0.220158	0.976807
Alkbh1	972.302	0.0687448	0.131518	0.522704	0.60118	0.993404
Alkbh2	115.666	-0.309604	0.201718	-1.53484	0.124824	0.924359
Alkbh3	598.194	0.0019793	0.110251	0.0179526	0.985677	0.999941
Alkbh4	214.136	0.149472	0.189365	0.789336	0.429915	0.992754
Alkbh5	2507.62	0.0309888	0.120976	0.256158	0.797829	0.999097
Alkbh6	541.806	0.286448	0.140321	2.04137	0.0412139	0.755503
Alkbh7	303.666	-0.0754236	0.161344	-0.46747	0.640163	0.993404
Alkbh8	2838.48	0.110746	0.0784219	1.41219	0.157895	0.946822
Alms1	1712.42	-0.00918723	0.114197	-0.0804508	0.935879	0.999941
Alox12b	74.5784	0.621781	0.303287	2.05014	0.0403505	0.750749
Alox5	55.5662	0.0940221	0.410028	0.229306	0.818631	0.999097
Alox5ap	132.054	-0.7744	0.407243	-1.90157	0.0572274	0.806754
Alox8	82.88	-0.0671959	0.240341	-0.279586	0.779795	0.998883
Aloxe3	150.255	-0.0782106	0.290057	-0.269639	0.787438	0.999097
Alpk1	286.37	-0.000792196	0.181239	-0.004371	0.996512	0.999941
Alpl	113.268	0.0977387	0.228795	0.427189	0.669241	0.993404
Als2	2297.43	0.00789808	0.0622022	0.126974	0.898961	0.999728
Als2cl	219.137	-0.161561	0.181552	-0.889893	0.373523	0.990874
Alx4	72.3923	0.783979	0.469179	1.67096	0.0947296	0.896095
Alyref	1043.48	0.0357305	0.145622	0.245365	0.806174	0.999097
Alyref2	102.391	0.212911	0.237064	0.898117	0.369123	0.990874
Amacr	320.356	0.0343773	0.141166	0.243524	0.807599	0.999097
Ambra1	4209.95	0.0251134	0.092292	0.272109	0.785538	0.999097
Amd1	3483.63	0.0441587	0.123093	0.358741	0.719789	0.993404
Amdhd2	506.867	-0.256388	0.122784	-2.08812	0.0367869	0.731111
Amer1	572.638	-0.0619217	0.144312	-0.429083	0.667863	0.993404
Amer2	615.085	0.113692	0.0996815	1.14055	0.254056	0.980357
Amer3	976.58	-0.039495	0.112611	-0.35072	0.725798	0.993422
Amfr	6030.47	0.0382715	0.0716695	0.534	0.593341	0.993404
Amigo1	2892.66	-0.0708758	0.113964	-0.621917	0.533997	0.993078
Amigo2	264.921	0.0512189	0.22347	0.229198	0.818715	0.999097
Ammecr1	972.434	0.00907534	0.099188	0.0914964	0.927098	0.999941
Ammecr1l	1432.48	-0.0481028	0.0735167	-0.654312	0.512911	0.993078
Amn	51.9084	0.13774	0.319012	0.431772	0.665907	0.993404
Amn1	1131.1	-0.00763509	0.094349	-0.0809239	0.935502	0.999941
Amot	1556	0.0878635	0.0773826	1.13544	0.25619	0.980357
Amotl1	1742.69	0.0931913	0.142358	0.654625	0.512709	0.993078
Amotl2	508.211	-0.0865717	0.134218	-0.645008	0.518922	0.993078
Ampd2	1777.84	0.055588	0.0623474	0.891584	0.372616	0.990874
Ampd3	931.549	-0.120553	0.15907	-0.75786	0.448535	0.992754
Amph	12775.5	0.0976998	0.133391	0.732431	0.463906	0.993078
Amt	699.918	-0.179356	0.141508	-1.26746	0.20499	0.969662
Amy1	1301.15	-0.0208621	0.170334	-0.122477	0.902521	0.999728
Amz1	590.046	0.0229537	0.22748	0.100904	0.919626	0.999941
Amz2	1908.14	0.0834138	0.0721641	1.15589	0.247726	0.980357
Anapc1	5768.52	0.0821438	0.0615894	1.33373	0.182292	0.96761
Anapc10	1199.59	0.0933783	0.0764391	1.2216	0.221858	0.976807
Anapc11	1085.12	0.153301	0.0829766	1.84751	0.0646726	0.832711
Anapc13	636.218	0.236841	0.105386	2.24736	0.024617	0.673446
Anapc15	860.973	-0.183444	0.139888	-1.31136	0.189736	0.968628
Anapc16	1371.01	-0.0720101	0.102179	-0.704743	0.48097	0.993078
Anapc2	1477.04	-0.0817165	0.108576	-0.752623	0.451676	0.992754
Anapc4	2885.81	0.0473843	0.0564374	0.839589	0.401139	0.990874
Anapc5	5528.29	0.0679643	0.0789032	0.861363	0.389038	0.990874
Anapc7	1214.65	-0.174749	0.104154	-1.6778	0.0933855	0.896095
Angel1	293.681	-0.205742	0.193519	-1.06316	0.287709	0.98345
Angel2	2313.76	0.0410436	0.102353	0.401002	0.688418	0.993404
Angpt1	837.059	-0.170264	0.162803	-1.04583	0.295642	0.98345
Angpt2	87.9877	1.02192	0.393963	2.59394	0.00948834	0.472046
Angptl1	44.4236	0.366759	0.466125	0.786824	0.431385	0.992754
Angptl2	142.556	0.00545702	0.282891	0.0192902	0.98461	0.999941
Angptl6	229.685	-0.0327825	0.164025	-0.199863	0.841587	0.999097
Ank	7804.08	-0.0310342	0.0761933	-0.407308	0.683782	0.993404
Ank1	1926.11	0.116128	0.0996451	1.16542	0.24385	0.980357
Ank2	61488.2	0.0341084	0.135875	0.251027	0.801793	0.999097
Ank3	31214	0.00466432	0.0967815	0.0481944	0.961561	0.999941
Ankdd1a	65.8511	-0.105768	0.272122	-0.38868	0.697513	0.993404
Ankef1	105.133	-0.38947	0.221535	-1.75805	0.0787388	0.877091
Ankfy1	4094.37	0.0182712	0.0949413	0.192448	0.847392	0.999164
Ankhd1	5679.73	0.127625	0.0626435	2.03732	0.0416183	0.755503
Ankib1	6179.16	0.0691258	0.0714589	0.96735	0.333369	0.98345
Ankle2	2290.63	-0.0221383	0.0857625	-0.258135	0.796303	0.999097
Ankmy2	2300.57	0.0781598	0.0923937	0.845943	0.397584	0.990874
Ankra2	1325.61	-0.080422	0.0827189	-0.972233	0.330935	0.98345
Ankrd10	3146.38	0.0246208	0.0734922	0.335013	0.737615	0.994993
Ankrd11	8644.37	-0.0374756	0.0664381	-0.564068	0.572708	0.993404
Ankrd12	10575.4	0.115927	0.087279	1.32823	0.184101	0.968628
Ankrd13a	1309.43	-0.182602	0.10937	-1.66958	0.0950031	0.896095
Ankrd13b	1275.68	-0.0366172	0.119171	-0.307267	0.75864	0.994993
Ankrd13c	4376.4	0.10503	0.15182	0.691805	0.48906	0.993078
Ankrd13d	1462.89	-0.136228	0.125764	-1.0832	0.278718	0.982637
Ankrd16	1049.62	-0.0320959	0.100598	-0.319053	0.749686	0.994993
Ankrd17	14440.7	0.1113	0.0604497	1.84121	0.0655912	0.833654
Ankrd24	669.599	-0.0673272	0.19298	-0.348881	0.727178	0.99393
Ankrd26	1481.16	0.0806052	0.0755759	1.06655	0.286177	0.98345
Ankrd27	1332.56	-0.131929	0.14489	-0.910542	0.362537	0.990874
Ankrd28	6360.23	-0.0360016	0.0626435	-0.574706	0.56549	0.993078
Ankrd29	1034.91	0.114548	0.104807	1.09294	0.274418	0.982515
Ankrd33b	6153.19	0.126164	0.115205	1.09513	0.27346	0.982515
Ankrd34a	794.778	-0.08976	0.125522	-0.715093	0.474551	0.993078
Ankrd34b	727.911	0.153959	0.197671	0.778865	0.436059	0.992754
Ankrd34c	816.868	-0.445438	0.231468	-1.9244	0.0543043	0.804446
Ankrd35	418.012	0.091634	0.135777	0.674884	0.499749	0.993078
Ankrd37	230.498	0.183335	0.256237	0.715489	0.474307	0.993078
Ankrd39	107.041	-0.254545	0.2405	-1.0584	0.289873	0.98345
Ankrd40	3608.44	0.0400858	0.101964	0.393136	0.694219	0.993404
Ankrd42	1247.55	0.0199574	0.0787871	0.253308	0.80003	0.999097
Ankrd44	1541.64	-0.0398599	0.141651	-0.281395	0.778408	0.998853
Ankrd45	2891.05	0.0646214	0.0818126	0.789871	0.429603	0.992754
Ankrd46	5047.34	-0.0441437	0.105362	-0.418971	0.675237	0.993404
Ankrd49	318.932	-0.0654902	0.162394	-0.403279	0.686743	0.993404
Ankrd50	3425.08	0.232596	0.12312	1.88918	0.0588674	0.808214
Ankrd52	2095.72	0.124196	0.0817728	1.5188	0.128813	0.924359
Ankrd54	332.057	-0.00544612	0.149662	-0.0363896	0.970972	0.999941
Ankrd55	238.284	0.0802115	0.161551	0.496509	0.619536	0.993404
Ankrd6	2007.95	-0.0230962	0.147192	-0.156912	0.875314	0.999164
Ankrd63	980.207	0.17231	0.537333	0.320677	0.748455	0.994993
Ankrd9	227.45	-0.0601164	0.19897	-0.302138	0.762547	0.995823
Anks1	1637.42	-0.0344432	0.0869948	-0.395922	0.692162	0.993404
Anks1b	34831.3	0.123815	0.0999972	1.23818	0.215648	0.973809
Anks3	1977.08	0.0175432	0.0710014	0.247083	0.804844	0.999097
Anks6	533.701	-0.13651	0.135351	-1.00856	0.313187	0.98345
Ankub1	107.413	-0.195643	0.302763	-0.646192	0.518155	0.993078
Ankzf1	743.829	0.0377308	0.0982968	0.383846	0.701093	0.993404
Anln	1237.17	0.020378	0.114129	0.178553	0.858289	0.999164
Ano1	227.898	0.180623	0.274275	0.658549	0.510185	0.993078
Ano10	1108.21	-0.112786	0.0997249	-1.13097	0.258066	0.980357
Ano2	425.224	-0.323443	0.613773	-0.526975	0.598211	0.993404
Ano3	18209	0.160008	0.116047	1.37882	0.167951	0.957667
Ano4	6212.74	-0.0772316	0.168973	-0.457064	0.647625	0.993404
Ano5	221.463	0.0759822	0.156661	0.48501	0.627669	0.993404
Ano6	2495.39	0.0928376	0.0642728	1.44443	0.148618	0.943382
Ano8	1436.31	0.0232006	0.105742	0.219408	0.826333	0.999097
Anp32a	7637.63	0.251705	0.089284	2.81914	0.00481521	0.337663
Anp32b	1014.51	0.050374	0.0800405	0.629356	0.529116	0.993078
Anp32e	3298.52	0.18481	0.108334	1.70592	0.0880227	0.896095
Anpep	90.3011	0.260179	0.222191	1.17097	0.24161	0.980357
Antxr1	1469.49	-0.349888	0.221965	-1.57632	0.114952	0.912187
Antxr2	235.589	-0.164785	0.304121	-0.54184	0.587929	0.993404
Anxa1	72.1986	0.608935	0.362582	1.67944	0.0930664	0.896095
Anxa11	422.652	-0.108329	0.206253	-0.525226	0.599426	0.993404
Anxa2	503.777	0.15251	0.540416	0.282209	0.777784	0.998853
Anxa3	556.534	-0.445578	0.320605	-1.3898	0.164588	0.957367
Anxa4	186.311	-0.267614	0.338013	-0.791727	0.42852	0.992754
Anxa5	1741.93	-0.0567488	0.21653	-0.262083	0.793258	0.999097
Anxa6	3812.58	0.0371856	0.130339	0.285299	0.775415	0.997959
Anxa7	3203.11	-0.0645567	0.0806333	-0.800621	0.423351	0.992754
Aoah	52.2055	0.230093	0.446462	0.51537	0.606294	0.993404
Aoc2	111.496	0.20964	0.20425	1.02639	0.30471	0.98345
Aox1	397.835	0.368166	0.193485	1.90281	0.0570651	0.806754
Aox3	204.931	0.726539	0.30057	2.41721	0.01564	0.558879
Aox4	75.2172	-0.488691	0.302154	-1.61736	0.1058	0.896896
Ap1ar	2797.09	0.0949862	0.120313	0.789492	0.429824	0.992754
Ap1b1	5772.58	-0.0677823	0.0962229	-0.70443	0.481165	0.993078
Ap1g1	6151.54	0.0428378	0.0716381	0.597976	0.549856	0.993078
Ap1g2	106.743	-0.251472	0.279159	-0.900819	0.367684	0.990874
Ap1m1	1715.35	0.0649981	0.0865768	0.750756	0.452799	0.992754
Ap1s1	5240.81	0.112856	0.120065	0.939955	0.347241	0.990581
Ap1s2	1879.82	-0.106118	0.15701	-0.675868	0.499124	0.993078
Ap1s3	146.883	-0.0786827	0.176453	-0.445912	0.655661	0.993404
Ap2a1	6559.13	-0.0277883	0.104828	-0.265085	0.790944	0.999097
Ap2a2	12770.3	0.0305869	0.173794	0.175995	0.860298	0.999164
Ap2b1	14897.4	0.116609	0.0871094	1.33865	0.180686	0.965277
Ap2m1	11409.1	0.00417144	0.0794081	0.0525316	0.958105	0.999941
Ap2s1	4156.52	-0.0631993	0.148314	-0.426119	0.670021	0.993404
Ap3b1	4220.96	0.196901	0.0744635	2.64427	0.00818683	0.445731
Ap3b2	5383.36	0.1299	0.118067	1.10023	0.271234	0.982515
Ap3d1	6134.04	0.0581265	0.072036	0.806908	0.419719	0.992754
Ap3m1	2410.01	-0.04957	0.0683422	-0.725321	0.468255	0.993078
Ap3m2	4294.49	-0.171637	0.107453	-1.59733	0.110192	0.906215
Ap3s1	3332.2	0.0156207	0.107342	0.145523	0.884298	0.999164
Ap3s2	2161.22	-0.04498	0.0884483	-0.508546	0.611071	0.993404
Ap4e1	1174.21	0.0180568	0.0690437	0.261527	0.793686	0.999097
Ap4m1	695.211	-0.092189	0.123264	-0.7479	0.454521	0.992754
Ap4s1	1702.83	0.08469	0.151939	0.557395	0.577258	0.993404
Ap5b1	109.442	0.000526857	0.244808	0.00215213	0.998283	0.999941
Ap5m1	1324.69	0.0421094	0.117754	0.357605	0.720639	0.993404
Ap5s1	330.047	-0.0483333	0.125454	-0.385266	0.700041	0.993404
Ap5z1	522.709	-0.100164	0.168041	-0.596071	0.551128	0.993078
Apaf1	1041.21	0.0284422	0.177388	0.160339	0.872614	0.999164
Apba1	8348.73	-0.0248931	0.133639	-0.18627	0.852233	0.999164
Apba2	9916.07	0.0275655	0.134512	0.204929	0.837627	0.999097
Apba3	361.659	0.0707652	0.179741	0.393707	0.693798	0.993404
Apbb1	10915.1	0.0720389	0.124572	0.578293	0.563066	0.993078
Apbb1ip	461.38	-0.629659	0.522729	-1.20456	0.228372	0.98019
Apbb2	5245.15	0.0192602	0.0962557	0.200094	0.841407	0.999097
Apc	30886.5	-0.0504998	0.0824895	-0.612197	0.540408	0.993078
Apc2	3586.59	-0.0953217	0.13371	-0.712899	0.475908	0.993078
Apcdd1	935.249	-0.289411	0.248553	-1.16438	0.24427	0.980357
Apeh	462.655	-0.0488051	0.150117	-0.325113	0.745096	0.994993
Apex1	1071.81	-0.250654	0.103427	-2.42349	0.0153721	0.55422
Apex2	2016.35	0.0828347	0.185986	0.445381	0.656044	0.993404
Aph1a	694.038	-0.00882916	0.0953876	-0.0925609	0.926252	0.999941
Aph1b	1413.31	-0.0134505	0.0904316	-0.148736	0.881762	0.999164
Aph1c	369.677	-0.225794	0.145387	-1.55306	0.120409	0.919519
Api5	3920.79	0.0999095	0.0836067	1.19499	0.232089	0.980357
Apip	730.935	0.0599005	0.101772	0.588576	0.556146	0.993078
Apitd1	93.4601	0.239849	0.216492	1.10789	0.267911	0.982515
Aplf	388.495	-0.00280419	0.131213	-0.0213712	0.98295	0.999941
Apln	641.207	-0.216792	0.236702	-0.915886	0.359727	0.990874
Aplp1	16035.5	0.0228328	0.124035	0.184084	0.853948	0.999164
Aplp2	17113.5	0.221796	0.0813698	2.72577	0.00641512	0.390746
Apmap	1977	-0.0113193	0.0720047	-0.157203	0.875085	0.999164
Apoa1bp	852.084	0.0548469	0.125708	0.436304	0.662616	0.993404
Apobec1	236.498	-1.42835	0.895748	-1.59458	0.110805	0.906215
Apobec3	135.219	-0.569505	0.488431	-1.16599	0.243619	0.980357
Apod	5035.03	-0.396743	0.446436	-0.88869	0.37417	0.990874
Apoe	29259	-0.345857	0.400027	-0.864585	0.387267	0.990874
Apol8	123.115	-0.0530891	0.217835	-0.243712	0.807454	0.999097
Apold1	255.523	0.428429	0.268389	1.5963	0.110422	0.906215
Apoo	1404.33	-0.0583278	0.0744423	-0.783529	0.433316	0.992754
Apool	494.311	-0.0341821	0.111848	-0.305611	0.759901	0.99513
Apopt1	900.125	-0.0607169	0.0866686	-0.700564	0.483575	0.993078
App	43069.5	0.0447328	0.0629879	0.710181	0.477592	0.993078
Appbp2	5229.99	-0.00492674	0.088782	-0.0554926	0.955746	0.999941
Appl1	7634.31	0.0922763	0.0994503	0.927864	0.353478	0.990874
Appl2	2926.14	-0.0394345	0.130844	-0.301387	0.76312	0.995823
Aprt	575.807	-0.0490404	0.143962	-0.340649	0.733368	0.994774
Aptx	1067.83	0.0342137	0.110473	0.309701	0.756788	0.994993
Aqp1	87.4234	0.482993	0.569218	0.848521	0.396148	0.990874
Aqp11	356.667	-0.00848078	0.138609	-0.061185	0.951212	0.999941
Aqp4	7387.84	-0.377848	0.368986	-1.02402	0.305827	0.98345
Aqp9	59.4558	0.00697164	0.309615	0.0225172	0.982035	0.999941
Aqr	2667.84	0.086429	0.0755476	1.14403	0.25261	0.980357
Ar	2164.68	0.019866	0.104774	0.189608	0.849616	0.999164
Araf	5221.31	-0.0149628	0.0945041	-0.158329	0.874197	0.999164
Arap1	619.511	-0.163642	0.184646	-0.886246	0.375485	0.990874
Arap2	9156.67	0.0521022	0.105326	0.494674	0.62083	0.993404
Arap3	246.624	0.0586609	0.249303	0.2353	0.813976	0.999097
Arc	2837.77	0.907512	0.559343	1.62246	0.104705	0.896095
Arcn1	4632.52	-0.00673644	0.0818142	-0.0823383	0.934378	0.999941
Arel1	7439.21	-0.127952	0.137392	-0.931291	0.351703	0.990874
Arf1	11453.7	-0.0270225	0.0957005	-0.282365	0.777663	0.998853
Arf2	1743.55	0.0559085	0.106397	0.52547	0.599257	0.993404
Arf3	21728.2	0.0479619	0.100627	0.476628	0.633627	0.993404
Arf4	3407.44	0.0885305	0.104846	0.84439	0.398451	0.990874
Arf5	1940.59	-0.0840644	0.0738072	-1.13897	0.254715	0.980357
Arf6	2144.9	0.0636952	0.129313	0.492568	0.622318	0.993404
Arfgap1	2978.29	0.0395765	0.104009	0.380511	0.703566	0.993404
Arfgap2	1887.25	0.138718	0.0989982	1.40121	0.16115	0.952232
Arfgap3	894.281	-0.00607529	0.192177	-0.0316131	0.974781	0.999941
Arfgef1	8560.16	-0.000777001	0.0683398	-0.0113697	0.990929	0.999941
Arfgef2	4324.27	0.0519095	0.0516382	1.00525	0.314775	0.98345
Arfgef3	8186.87	-0.0840768	0.101062	-0.831935	0.405445	0.991271
Arfip1	162.827	0.0687225	0.2054	0.334579	0.737943	0.994993
Arfip2	2348.01	-0.0417591	0.0841876	-0.496024	0.619877	0.993404
Arfrp1	855.572	0.0530745	0.1215	0.436828	0.662236	0.993404
Arg2	165.007	-0.173744	0.340279	-0.510591	0.609637	0.993404
Arglu1	5707.54	0.00526746	0.133609	0.0394243	0.968552	0.999941
Arhgap1	2357.4	1.20266e-05	0.0787468	0.000152725	0.999878	0.999941
Arhgap10	3351.63	0.0214727	0.0931247	0.23058	0.817641	0.999097
Arhgap11a	176.996	-0.071016	0.254797	-0.278716	0.780463	0.999014
Arhgap12	3026.38	-0.0826587	0.0941964	-0.877515	0.380207	0.990874
Arhgap15	2323.33	0.173042	0.214222	0.807769	0.419224	0.992754
Arhgap17	1356.12	-0.0988808	0.215059	-0.459784	0.645671	0.993404
Arhgap18	1134.58	-0.0548674	0.113174	-0.484804	0.627815	0.993404
Arhgap19	276.498	-0.12435	0.27621	-0.450201	0.652565	0.993404
Arhgap20	6529.86	-0.128494	0.0834965	-1.53892	0.123824	0.924359
Arhgap21	7791.96	0.0777071	0.0746159	1.04143	0.297677	0.98345
Arhgap22	982.185	-0.208021	0.222381	-0.935424	0.34957	0.990667
Arhgap23	3019.61	0.0556879	0.0748882	0.743614	0.45711	0.992754
Arhgap24	728.483	-0.265332	0.23673	-1.12082	0.262365	0.980357
Arhgap25	841.27	-0.0435609	0.254286	-0.171307	0.863983	0.999164
Arhgap26	10962.1	0.0401431	0.146709	0.273623	0.784374	0.999097
Arhgap27	368.028	-0.0572769	0.143946	-0.397906	0.690699	0.993404
Arhgap28	91.7177	0.193259	0.282119	0.685028	0.493326	0.993078
Arhgap29	1962.25	0.152	0.156049	0.974054	0.33003	0.98345
Arhgap30	219.537	-0.286119	0.306335	-0.934008	0.3503	0.990667
Arhgap31	1496.93	0.129236	0.178376	0.724516	0.468749	0.993078
Arhgap32	20485.4	-0.137213	0.106056	-1.29378	0.195742	0.968628
Arhgap33	1641.71	0.13291	0.166097	0.800196	0.423597	0.992754
Arhgap35	11282.2	0.000181624	0.0657084	0.00276409	0.997795	0.999941
Arhgap39	3032.76	0.0396416	0.0865116	0.458224	0.646792	0.993404
Arhgap4	171.995	-0.361359	0.195069	-1.85247	0.0639586	0.832098
Arhgap42	1972.89	0.0284046	0.0697133	0.40745	0.683678	0.993404
Arhgap44	7167.11	-0.0384665	0.1402	-0.274368	0.783802	0.999097
Arhgap5	9806.29	-0.096864	0.103645	-0.934576	0.350007	0.990667
Arhgap6	1093.32	-0.0870429	0.208152	-0.41817	0.675823	0.993404
Arhgdia	4603.44	-0.129991	0.0951691	-1.3659	0.171971	0.959979
Arhgdib	355.91	0.0614051	0.269824	0.227575	0.819977	0.999097
Arhgdig	949.584	0.149538	0.145861	1.02521	0.305263	0.98345
Arhgef1	738.524	-0.0806054	0.138579	-0.581657	0.560798	0.993078
Arhgef10	1683.7	-0.0977336	0.0966532	-1.01118	0.311931	0.98345
Arhgef10l	1590.8	-0.0507493	0.0933603	-0.543585	0.586727	0.993404
Arhgef11	4524.35	-0.0788993	0.100167	-0.787679	0.430885	0.992754
Arhgef12	15400	0.102644	0.0760467	1.34975	0.177095	0.965277
Arhgef15	478.047	-0.209111	0.130843	-1.59819	0.11	0.906215
Arhgef17	5252.16	-0.0197463	0.0640379	-0.308354	0.757813	0.994993
Arhgef18	1955.82	-0.0824966	0.09468	-0.87132	0.383579	0.990874
Arhgef19	222.488	-0.00133073	0.241132	-0.00551866	0.995597	0.999941
Arhgef2	4468.05	-0.0505753	0.121758	-0.415375	0.677868	0.993404
Arhgef25	3593.13	0.116433	0.137537	0.846559	0.397241	0.990874
Arhgef26	1803.09	-0.133524	0.229423	-0.582002	0.560565	0.993078
Arhgef28	3368.97	0.220808	0.159391	1.38532	0.165955	0.957367
Arhgef3	3544.42	-0.0621932	0.0570662	-1.08984	0.275783	0.982515
Arhgef33	181.497	-0.204132	0.203663	-1.0023	0.316198	0.98345
Arhgef37	1231.98	0.963093	0.374832	2.5694	0.0101875	0.489188
Arhgef4	5830.82	0.0293218	0.0805196	0.364158	0.71574	0.993404
Arhgef40	611.569	0.242814	0.168066	1.44475	0.148528	0.943382
Arhgef5	127.841	0.184997	0.25465	0.726476	0.467547	0.993078
Arhgef6	722.448	0.0812824	0.169704	0.478966	0.631963	0.993404
Arhgef7	6099.54	0.0163	0.123503	0.131981	0.894999	0.999728
Arhgef9	18943.3	0.028338	0.131595	0.215342	0.829501	0.999097
Arid1a	4162.44	0.0125293	0.0801637	0.156297	0.875799	0.999164
Arid1b	8163.9	0.011811	0.0911626	0.129559	0.896915	0.999728
Arid2	3489.68	0.0141329	0.0515536	0.27414	0.783977	0.999097
Arid3a	367.18	-0.117716	0.11256	-1.0458	0.295651	0.98345
Arid3b	434.873	-0.163003	0.120228	-1.35578	0.17517	0.963133
Arid4a	3016.76	0.0132345	0.0616828	0.214557	0.830113	0.999097
Arid4b	5487.93	0.0145711	0.0729987	0.199608	0.841788	0.999097
Arid5a	251.876	-0.0377115	0.165079	-0.228445	0.819301	0.999097
Arid5b	2247.6	-0.236359	0.184877	-1.27847	0.201085	0.9688
Arih1	7336.12	0.0838976	0.0693863	1.20914	0.22661	0.979374
Arih2	2388.95	-0.00647905	0.101079	-0.0640988	0.948892	0.999941
Arl1	4820.24	0.00805851	0.114667	0.0702774	0.943973	0.999941
Arl10	215.051	0.177372	0.218615	0.811344	0.417168	0.992754
Arl13b	1069.86	-0.0397407	0.0867108	-0.458314	0.646727	0.993404
Arl14ep	2059.15	0.0646028	0.116113	0.556377	0.577953	0.993404
Arl15	7059.1	0.0729277	0.1792	0.406963	0.684035	0.993404
Arl16	489.695	0.0305162	0.146426	0.208407	0.834912	0.999097
Arl2	1143.7	0.0587026	0.087285	0.67254	0.50124	0.993078
Arl2bp	3491.33	-0.14718	0.0698246	-2.10785	0.0350437	0.715349
Arl3	2645.29	-0.0446146	0.0915231	-0.487468	0.625927	0.993404
Arl4a	2140.88	-0.229596	0.130772	-1.7557	0.0791404	0.877745
Arl4c	1283.05	-0.105037	0.0987169	-1.06402	0.287317	0.98345
Arl4d	492.145	0.825742	0.56358	1.46517	0.142874	0.939321
Arl5a	4514.52	-0.0510298	0.119046	-0.428656	0.668173	0.993404
Arl5b	1612.71	0.152802	0.19733	0.774347	0.438725	0.992754
Arl5c	100.709	-0.525217	0.25547	-2.05589	0.0397931	0.750749
Arl6	1223.11	-0.00256824	0.127567	-0.0201325	0.983938	0.999941
Arl6ip1	9151.62	0.00028167	0.117575	0.00239566	0.998089	0.999941
Arl6ip4	778.526	0.0944401	0.105462	0.895492	0.370524	0.990874
Arl6ip5	2856.55	-0.0366372	0.0621075	-0.589899	0.555258	0.993078
Arl6ip6	634.555	0.0124695	0.123768	0.100749	0.91975	0.999941
Arl8a	3006.13	-0.0728374	0.06601	-1.10343	0.269841	0.982515
Arl8b	8026.89	0.016125	0.0824247	0.195633	0.844898	0.999164
Armc1	3183.35	0.0117085	0.0929516	0.125963	0.899761	0.999728
Armc10	764.087	-0.142102	0.0937246	-1.51617	0.129476	0.924359
Armc2	539.197	-0.161914	0.161474	-1.00272	0.315994	0.98345
Armc3	57.2673	-0.190092	0.360714	-0.526988	0.598202	0.993404
Armc4	77.0396	-0.652687	0.282759	-2.30828	0.0209834	0.627265
Armc5	260.393	-0.0544674	0.188433	-0.289055	0.772539	0.997464
Armc6	929.198	0.0248699	0.0925358	0.26876	0.788115	0.999097
Armc7	234.592	0.0176917	0.185134	0.0955615	0.923869	0.999941
Armc8	5017.2	-0.0584316	0.0536339	-1.08945	0.275954	0.982515
Armc9	2461.66	0.001476	0.0815789	0.0180929	0.985565	0.999941
Armcx1	2717.46	-0.0062961	0.115777	-0.0543815	0.956631	0.999941
Armcx2	2398.79	-0.0453684	0.115995	-0.391124	0.695706	0.993404
Armcx3	2349.78	-0.10797	0.113396	-0.952155	0.341018	0.985481
Armcx4	3260.09	0.0781165	0.0692249	1.12844	0.259132	0.980357
Armcx6	95.4194	0.075404	0.247087	0.305172	0.760235	0.99513
Armt1	878.332	-0.0883724	0.086471	-1.02199	0.306787	0.98345
Arnt	2461.02	-0.0195859	0.0918986	-0.213125	0.831229	0.999097
Arnt2	11387.8	-0.167533	0.109432	-1.53093	0.125786	0.924359
Arntl	2174.95	0.0881873	0.174045	0.506692	0.612371	0.993404
Arntl2	738.549	-0.112892	0.157471	-0.716908	0.473431	0.993078
Arpc1a	4307.94	-0.12083	0.0670151	-1.80302	0.071385	0.857894
Arpc1b	717.026	-0.544442	0.461147	-1.18063	0.237752	0.980357
Arpc2	5109.71	-0.109144	0.0967486	-1.12812	0.259271	0.980357
Arpc3	5034.29	-0.0560602	0.0736211	-0.761469	0.446377	0.992754
Arpc4	4097.11	0.0149929	0.076555	0.195845	0.844732	0.999164
Arpc5	3352.4	0.231938	0.182564	1.27045	0.203924	0.969662
Arpc5l	2533.34	0.0566292	0.0820717	0.689996	0.490197	0.993078
Arpin	567.986	-0.104782	0.11585	-0.904467	0.365748	0.990874
Arpp19	15382.6	-0.116531	0.184988	-0.629934	0.528737	0.993078
Arpp21	34125.6	-0.056647	0.0739662	-0.765849	0.443766	0.992754
Arrb1	16095.1	0.0784256	0.114024	0.687797	0.491581	0.993078
Arrb2	1146.78	-0.0935703	0.101109	-0.925437	0.354739	0.990874
Arrdc1	245.671	-0.160448	0.183709	-0.873379	0.382457	0.990874
Arrdc2	220.237	0.377634	0.272362	1.38652	0.16559	0.957367
Arrdc3	2677.9	-0.0478902	0.0805908	-0.59424	0.552352	0.993078
Arrdc4	313.952	0.0557767	0.152924	0.364735	0.71531	0.993404
Arsa	804.186	-0.111624	0.111936	-0.997212	0.318662	0.98345
Arsg	927.954	-0.265654	0.16852	-1.57639	0.114936	0.912187
Arsj	381.71	-0.136902	0.624788	-0.219118	0.826558	0.999097
Arsk	476.685	-0.124192	0.155992	-0.796142	0.425949	0.992754
Art3	128.194	-0.276912	0.206877	-1.33854	0.180721	0.965277
Arv1	389.564	0.0846639	0.124518	0.679933	0.496547	0.993078
Arvcf	1009.63	-0.0208391	0.107273	-0.194262	0.845971	0.999164
Arx	419.026	0.0414191	0.206252	0.200818	0.840841	0.999097
Arxes1	369.391	-0.00421545	0.150284	-0.0280498	0.977622	0.999941
Arxes2	1273.08	-0.198596	0.104788	-1.89521	0.0580641	0.808214
As3mt	416.117	-0.289082	0.169343	-1.70708	0.0878074	0.896095
Asah1	3137.95	-0.0532508	0.113494	-0.469194	0.638931	0.993404
Asah2	641.208	-0.0989959	0.155089	-0.638317	0.523267	0.993078
Asap1	10744.6	0.0735462	0.100306	0.733221	0.463424	0.993078
Asap2	1484.15	0.0345636	0.113357	0.304909	0.760435	0.995175
Asap3	242.169	-0.150742	0.286458	-0.526225	0.598732	0.993404
Asb1	1681.91	-0.0673883	0.100986	-0.667306	0.504576	0.993078
Asb11	198.989	-0.332846	0.301997	-1.10215	0.270396	0.982515
Asb13	1336.17	-0.173905	0.0883729	-1.96786	0.0490845	0.790368
Asb18	131.73	-0.23872	0.194254	-1.22891	0.219106	0.976807
Asb2	170.04	0.36142	0.244905	1.47575	0.14001	0.936583
Asb3	2483.76	0.0068475	0.0728708	0.0939677	0.925135	0.999941
Asb5	239.167	-0.144918	0.179412	-0.807739	0.419241	0.992754
Asb6	707.584	-0.0181928	0.100873	-0.180353	0.856876	0.999164
Asb7	1316.66	-0.0639412	0.0723433	-0.883858	0.376773	0.990874
Asb8	1295.19	-0.100293	0.0773228	-1.29707	0.194609	0.968628
Ascc1	637.774	-0.140447	0.112265	-1.25103	0.210924	0.969662
Ascc2	956.86	-0.0816764	0.108096	-0.75559	0.449895	0.992754
Ascc3	5190.76	0.124075	0.0623119	1.9912	0.0464592	0.770988
Ascl1	73.9422	0.176572	0.246624	0.715957	0.474018	0.993078
Asf1a	539.92	-0.0192095	0.15768	-0.121826	0.903037	0.999728
Ash1l	11314.2	0.0500637	0.0916005	0.546544	0.584692	0.993404
Ash2l	1630.81	-0.000110981	0.0666088	-0.00166615	0.998671	0.999941
Asic1	2110.18	0.0336345	0.0943325	0.356553	0.721427	0.993404
Asic2	19524.7	0.0444131	0.230865	0.192377	0.847447	0.999164
Asic4	826.893	0.0440902	0.519581	0.0848572	0.932375	0.999941
Asic5	2031.69	0.871654	0.777197	1.12153	0.26206	0.980357
Asl	362.618	-0.159239	0.212893	-0.747974	0.454476	0.992754
Asmt	220.109	-0.139859	0.179546	-0.778961	0.436002	0.992754
Asna1	2012.04	0.273483	0.101781	2.68697	0.00721032	0.415698
Asns	3745.22	0.147338	0.123682	1.19126	0.233552	0.980357
Aspa	1148.42	-0.286289	0.161956	-1.76769	0.077112	0.877091
Aspdh	43.9282	-0.292681	0.339575	-0.861902	0.388741	0.990874
Aspg	395.786	-0.30813	0.87806	-0.350922	0.725647	0.993404
Asph	8282.81	-0.18563	0.109977	-1.6879	0.0914303	0.896095
Asphd1	663.668	0.152201	0.184286	0.825895	0.408864	0.991769
Asphd2	2276.61	-0.0837594	0.0812285	-1.03116	0.302467	0.98345
Aspm	130.692	-1.20814	0.53431	-2.26113	0.0237513	0.669041
Aspn	68.2955	0.103492	0.340626	0.303828	0.761259	0.995378
Aspscr1	763.382	-0.155364	0.0884312	-1.75689	0.0789364	0.877195
Asrgl1	5681.49	-0.214579	0.175709	-1.22122	0.222003	0.976807
Ass1	836.267	-0.00733884	0.111604	-0.0657577	0.947571	0.999941
Aste1	448.056	-0.00879209	0.134318	-0.0654573	0.94781	0.999941
Astn1	16117.5	-0.0296575	0.110607	-0.268134	0.788596	0.999097
Astn2	10911.1	-0.00512706	0.230377	-0.0222551	0.982244	0.999941
Asxl1	3040.84	-0.0335562	0.0736467	-0.455637	0.648651	0.993404
Asxl2	3321.36	-0.0160363	0.0728838	-0.220025	0.825852	0.999097
Asxl3	3325.04	0.529017	0.0864896	6.11654	9.5631e-10	1.01998e-06
Atad1	5630.6	-0.00832975	0.110125	-0.0756393	0.939706	0.999941
Atad2	919.794	-0.203161	0.147007	-1.38198	0.166977	0.957367
Atad2b	2553.03	0.0134232	0.0823757	0.162951	0.870557	0.999164
Atad3a	1103.36	0.046549	0.102339	0.454852	0.649216	0.993404
Atad5	463.637	-0.0872224	0.131701	-0.662277	0.507794	0.993078
Atat1	736.915	-0.0932182	0.125885	-0.740504	0.458994	0.992754
Atcay	6429.4	-0.0369237	0.107112	-0.34472	0.730305	0.99411
Atf1	810.563	-0.153587	0.0915463	-1.67769	0.0934073	0.896095
Atf2	7061.55	0.084258	0.0982458	0.857625	0.3911	0.990874
Atf4	3205.36	0.423388	0.210932	2.00722	0.0447259	0.765416
Atf5	315.312	0.362392	0.186355	1.94463	0.0518192	0.798126
Atf6	6461.82	0.14598	0.0873671	1.67088	0.0947445	0.896095
Atf6b	1119.57	0.199039	0.0817199	2.43562	0.0148662	0.545791
Atf7	43.2886	0.386202	0.334083	1.15601	0.247679	0.980357
Atf7ip	4789.61	-0.0871984	0.0713022	-1.22294	0.221351	0.976807
Atg10	1753.52	-0.0137269	0.183774	-0.0746941	0.940458	0.999941
Atg101	825.855	-0.0944968	0.0967832	-0.976377	0.328878	0.98345
Atg12	2559.73	0.0248336	0.0870472	0.285289	0.775423	0.997959
Atg13	1845.26	-0.134148	0.107148	-1.25199	0.210573	0.969662
Atg14	1047.3	0.11208	0.0699211	1.60296	0.108944	0.906028
Atg16l1	2967.26	0.0662707	0.0684522	0.968131	0.332979	0.98345
Atg16l2	802.035	0.0444155	0.107477	0.413255	0.67942	0.993404
Atg2a	1153	-0.0942547	0.107824	-0.874156	0.382033	0.990874
Atg2b	4640.14	0.0347151	0.0548591	0.632805	0.526861	0.993078
Atg3	2330.06	0.125839	0.0827604	1.52052	0.12838	0.924359
Atg4a	528.737	-0.131584	0.137479	-0.957123	0.338505	0.985055
Atg4b	1952.82	0.0523799	0.0665208	0.787422	0.431035	0.992754
Atg4c	2347.07	-0.0866467	0.0947509	-0.914469	0.36047	0.990874
Atg4d	544.92	-0.0692102	0.106926	-0.64727	0.517457	0.993078
Atg5	1504.58	0.0393085	0.0650483	0.604297	0.545646	0.993078
Atg7	1228.69	-0.0398736	0.143377	-0.278102	0.780934	0.999097
Atg9a	2217.52	-0.102467	0.0771802	-1.32763	0.184299	0.968628
Atg9b	117.799	-0.0860175	0.229182	-0.375324	0.70742	0.993404
Athl1	206.399	-0.0148121	0.222607	-0.0665395	0.946948	0.999941
Atic	1059.29	0.0284196	0.0879671	0.32307	0.746642	0.994993
Atl1	5377	0.100064	0.077399	1.29283	0.196069	0.968628
Atl2	3251.62	0.0232087	0.101068	0.229633	0.818377	0.999097
Atl3	2385.4	-0.0993172	0.0774906	-1.28167	0.199959	0.9688
Atm	2344.92	-0.0691955	0.0943413	-0.73346	0.463278	0.993078
Atmin	2658.92	-0.0208266	0.0823934	-0.25277	0.800446	0.999097
Atoh8	74.9086	0.0330059	0.27434	0.12031	0.904238	0.999728
Atox1	1191.46	-0.0457025	0.127514	-0.358411	0.720036	0.993404
Atp10a	793.599	0.175465	0.11085	1.58291	0.113442	0.912065
Atp10b	127.416	-0.132811	0.304176	-0.436625	0.662384	0.993404
Atp11a	3071.75	-0.0264433	0.0683063	-0.387128	0.698661	0.993404
Atp11b	4760.52	-0.156724	0.0967684	-1.61958	0.105323	0.896095
Atp11c	1912.66	0.168694	0.13456	1.25367	0.209961	0.969662
Atp13a1	1471.71	-0.0791939	0.0857786	-0.923236	0.355884	0.990874
Atp13a2	3061.28	-0.0985377	0.141194	-0.69789	0.485246	0.993078
Atp13a3	4949.48	0.0734534	0.102389	0.717394	0.473131	0.993078
Atp13a4	492.12	0.0510825	0.235963	0.216485	0.82861	0.999097
Atp13a5	849.281	-0.158368	0.14564	-1.08739	0.276863	0.982515
Atp1a1	22446.1	-0.0687739	0.1564	-0.439732	0.660131	0.993404
Atp1a2	34607.7	0.0161629	0.137927	0.117184	0.906714	0.999728
Atp1a3	35788	-0.101692	0.141882	-0.716736	0.473537	0.993078
Atp1b1	42585.7	-0.163743	0.0803921	-2.0368	0.0416697	0.755503
Atp1b2	3531.68	-0.295381	0.195792	-1.50864	0.13139	0.926715
Atp1b3	4792.86	0.0706075	0.127312	0.554602	0.579167	0.993404
Atp2a2	35575.2	0.137779	0.0612562	2.24923	0.0244981	0.673446
Atp2a3	170.555	0.127676	0.193573	0.659574	0.509527	0.993078
Atp2b1	49883.4	0.0905642	0.111638	0.811227	0.417235	0.992754
Atp2b2	32186	-0.00941413	0.164791	-0.0571278	0.954443	0.999941
Atp2b3	4595.47	0.0762084	0.0799159	0.953608	0.340282	0.985481
Atp2b4	11172	0.193331	0.115343	1.67614	0.0937114	0.896095
Atp2c1	11622.1	-0.0662307	0.0768009	-0.862369	0.388484	0.990874
Atp2c2	87.717	0.0241331	0.688897	0.0350315	0.972055	0.999941
Atp5a1	26987.8	-0.060114	0.0759343	-0.791658	0.42856	0.992754
Atp5b	29505.9	0.0654839	0.05363	1.22103	0.222074	0.976807
Atp5c1	9634.06	-0.140857	0.083219	-1.6926	0.0905311	0.896095
Atp5d	3662.71	0.0692502	0.106478	0.650368	0.515455	0.993078
Atp5e	3979.34	-0.110923	0.0946805	-1.17155	0.241378	0.980357
Atp5f1	9836.4	-0.0167479	0.0680375	-0.246157	0.80556	0.999097
Atp5g1	4331.87	0.0300008	0.101141	0.296622	0.766755	0.995838
Atp5g2	1640.63	-0.296561	0.0938349	-3.16045	0.00157523	0.18668
Atp5g3	6703.73	0.0755564	0.0882139	0.856513	0.391714	0.990874
Atp5h	6275.83	0.0544775	0.0669871	0.813254	0.416072	0.992754
Atp5j	3976.21	0.0530428	0.0649026	0.817268	0.413775	0.991769
Atp5j2	4988.55	-0.039057	0.0727149	-0.537125	0.591181	0.993404
Atp5k	7269.14	-0.0130563	0.086499	-0.150942	0.880022	0.999164
Atp5l	3603.37	-0.290174	0.122735	-2.36422	0.0180679	0.59318
Atp5o	5565.99	-0.0619615	0.059467	-1.04195	0.297435	0.98345
Atp5s	691.85	-0.249807	0.109368	-2.28409	0.0223661	0.645617
Atp5sl	774.944	-0.0440594	0.0907211	-0.485658	0.62721	0.993404
Atp6ap1	10415.8	-0.00779622	0.0740425	-0.105294	0.916143	0.999728
Atp6ap1l	682.647	-0.210682	0.134169	-1.57027	0.116352	0.912187
Atp6ap2	11651.5	0.0549613	0.122811	0.447528	0.654494	0.993404
Atp6v0a1	13783.3	-0.0882641	0.0935677	-0.943319	0.345518	0.990581
Atp6v0a2	2371.38	0.0129333	0.123317	0.104878	0.916472	0.999728
Atp6v0a4	78.1478	0.037372	0.229292	0.162988	0.870528	0.999164
Atp6v0b	5300.65	0.00259791	0.0892538	0.029107	0.976779	0.999941
Atp6v0d1	5540.16	-0.163239	0.0573019	-2.84875	0.00438911	0.326465
Atp6v0e	1037.62	-0.105553	0.125063	-0.843995	0.398672	0.990874
Atp6v0e2	7910.76	-0.0588302	0.0937613	-0.627447	0.530366	0.993078
Atp6v1a	23673.5	-0.0709867	0.110983	-0.639617	0.522422	0.993078
Atp6v1b2	21099.6	0.109507	0.131097	0.835313	0.403542	0.990874
Atp6v1c1	10347.7	-0.0610947	0.0704567	-0.867125	0.385874	0.990874
Atp6v1c2	68.0661	-0.726673	0.459996	-1.57974	0.114167	0.912187
Atp6v1d	7948.69	-0.0174968	0.0831497	-0.210425	0.833336	0.999097
Atp6v1e1	14262	-0.156775	0.108512	-1.44477	0.148523	0.943382
Atp6v1f	2370.54	-0.0340483	0.0785223	-0.433613	0.66457	0.993404
Atp6v1g1	3037.94	-0.123567	0.0961822	-1.28472	0.19889	0.9688
Atp6v1g2	8398.24	-0.0191635	0.0955533	-0.200553	0.841048	0.999097
Atp6v1h	9087.32	-0.00351873	0.091545	-0.0384371	0.969339	0.999941
Atp7a	846.954	0.0129752	0.13153	0.0986481	0.921418	0.999941
Atp7b	131.139	-0.255789	0.19591	-1.30564	0.191674	0.968628
Atp8a1	21673.1	-0.0389334	0.0980157	-0.397216	0.691208	0.993404
Atp8a2	4504.12	0.060005	0.138784	0.432363	0.665477	0.993404
Atp8b1	448.154	-0.211236	0.105357	-2.00495	0.0449687	0.76591
Atp8b2	3120.98	0.0666665	0.120872	0.551544	0.581261	0.993404
Atp9a	10518.1	-0.098078	0.10083	-0.972702	0.330701	0.98345
Atp9b	7009.83	0.027328	0.0839557	0.325506	0.744798	0.994993
Atpaf1	1955.41	-0.0459413	0.128551	-0.357379	0.720808	0.993404
Atpaf2	793.537	-0.0423025	0.0920019	-0.459801	0.645659	0.993404
Atpif1	5505.4	-0.141778	0.128575	-1.10269	0.270163	0.982515
Atr	1891.13	0.0379031	0.0803128	0.471943	0.636967	0.993404
Atraid	1801.02	-0.257272	0.0732586	-3.51183	0.000445036	0.083765
Atrn	12404	0.0371565	0.0522063	0.711724	0.476636	0.993078
Atrnl1	14951.1	0.0267798	0.112006	0.239093	0.811033	0.999097
Atrx	17674.7	0.00558076	0.0868268	0.0642746	0.948752	0.999941
Atxn1	12550.3	0.0700079	0.0569494	1.2293	0.218959	0.976807
Atxn10	8460.32	-0.0544144	0.100936	-0.539099	0.589818	0.993404
Atxn1l	1978.68	0.00535763	0.119111	0.0449802	0.964123	0.999941
Atxn2	4685.49	-0.0111177	0.0799728	-0.139018	0.889436	0.999616
Atxn2l	1840.24	0.0416993	0.0717944	0.580815	0.561365	0.993078
Atxn3	2178.7	-0.0832671	0.0930906	-0.894473	0.371069	0.990874
Atxn7	2052.04	-0.0289709	0.085239	-0.339879	0.733948	0.994774
Atxn7l1	3271.69	-0.0127895	0.1193	-0.107205	0.914626	0.999728
Atxn7l2	422.246	-0.0270538	0.146329	-0.184883	0.853321	0.999164
Atxn7l3	5052.24	0.052633	0.119073	0.442021	0.658474	0.993404
Atxn7l3b	6845.93	-0.124491	0.113873	-1.09325	0.274285	0.982515
Auh	2252.6	0.0149263	0.12307	0.121283	0.903467	0.999728
Aup1	1001.05	-0.0859795	0.0876724	-0.980691	0.326745	0.98345
Aurkaip1	1336.36	-0.120506	0.079045	-1.52452	0.127379	0.924359
Auts2	24036.5	0.17777	0.175879	1.01075	0.312136	0.98345
Aven	697.228	0.0204855	0.204589	0.10013	0.920241	0.999941
Avl9	4060.6	-0.00011805	0.0818546	-0.00144219	0.998849	0.999941
Avpi1	570.558	-0.163755	0.126144	-1.29815	0.194234	0.968628
AW011738	69.9065	0.0663578	0.301939	0.219772	0.826048	0.999097
Axin1	1253.66	0.064207	0.0949852	0.675969	0.499061	0.993078
Axin2	876.523	0.143688	0.106167	1.35341	0.175923	0.963684
Axl	1233.11	-0.423784	0.236114	-1.79482	0.0726818	0.862796
Azi2	3723.21	0.0610178	0.108345	0.563182	0.573311	0.993404
Azin1	9410.63	0.125346	0.136243	0.920019	0.357563	0.990874
Azin2	994.159	-0.134681	0.142549	-0.944804	0.344759	0.990356
B2m	3043.33	-0.517693	0.478301	-1.08236	0.279094	0.982637
B3galnt1	1910.48	-0.113351	0.0919228	-1.23311	0.217535	0.976042
B3galnt2	1274.09	0.0593022	0.0714111	0.830434	0.406294	0.991638
B3galt1	18499.1	0.0759458	0.0897221	0.846456	0.397298	0.990874
B3galt2	3619.63	-0.0550996	0.178743	-0.308262	0.757883	0.994993
B3galt4	100.343	-0.167391	0.209409	-0.799353	0.424086	0.992754
B3galt5	1628.87	0.0556137	0.122726	0.453154	0.650438	0.993404
B3galt6	399.599	0.119536	0.1452	0.823247	0.410368	0.991769
B3gat1	4032.28	0.000488842	0.144033	0.00339395	0.997292	0.999941
B3gat2	456.472	0.237745	0.186753	1.27304	0.203004	0.9688
B3gat3	2473.43	0.154427	0.153224	1.00785	0.313528	0.98345
B3glct	1202.17	0.00137168	0.0971639	0.0141172	0.988736	0.999941
B3gnt5	63.7013	-0.0363332	0.328847	-0.110487	0.912023	0.999728
B3gnt9	109.979	-0.150666	0.230598	-0.65337	0.513518	0.993078
B3gntl1	679.186	-0.0248541	0.151024	-0.164571	0.869282	0.999164
B430305J03Rik	95.0315	0.249017	0.230285	1.08134	0.279546	0.982637
B4galnt1	1962.02	0.0101421	0.142333	0.0712559	0.943194	0.999941
B4galnt3	60.9158	0.462583	0.318453	1.45259	0.146337	0.943382
B4galnt4	1879.89	0.0590453	0.128919	0.458004	0.646949	0.993404
B4galt1	540.893	-0.110438	0.476726	-0.231659	0.816803	0.999097
B4galt2	1510.19	-0.185196	0.144616	-1.2806	0.200334	0.9688
B4galt3	833.845	-0.186176	0.103057	-1.80653	0.0708354	0.855097
B4galt4	790.747	0.00401607	0.0782709	0.0513098	0.959079	0.999941
B4galt5	2268.29	-0.0528156	0.0649066	-0.813716	0.415808	0.992754
B4galt6	5410.52	-0.035432	0.121083	-0.292625	0.769809	0.996395
B4galt7	672.726	-0.256809	0.0937542	-2.73918	0.00615931	0.382891
B4gat1	2521.35	-0.0718539	0.106674	-0.673584	0.500576	0.993078
B9d1	626.949	-0.17801	0.120347	-1.47914	0.139103	0.936059
B9d2	300.288	-0.00287039	0.147301	-0.0194866	0.984453	0.999941
Baalc	653.493	0.0281775	0.180815	0.155836	0.876162	0.999164
Babam1	1398.08	-0.124271	0.0750936	-1.65488	0.097948	0.896095
Bace1	3586.35	-0.0517989	0.0813531	-0.636717	0.524309	0.993078
Bace2	241.556	-0.342582	0.300424	-1.14033	0.254149	0.980357
Bach1	1078.16	0.0671295	0.149881	0.447885	0.654237	0.993404
Bach2	2529.62	0.250868	0.110682	2.26657	0.0234163	0.664535
Bad	785.003	-0.215327	0.0988721	-2.17783	0.0294185	0.697274
Bag1	2425.43	-0.203719	0.105742	-1.92657	0.0540334	0.804156
Bag2	225.753	-0.141082	0.1749	-0.806644	0.419872	0.992754
Bag3	176.176	0.139617	0.314259	0.444273	0.656845	0.993404
Bag4	3271.83	-0.0220565	0.123591	-0.178463	0.858359	0.999164
Bag5	1523.48	0.217015	0.167782	1.29343	0.195861	0.968628
Bag6	3769.69	0.0279936	0.0576723	0.485391	0.627399	0.993404
Bahcc1	592.672	-0.154073	0.157778	-0.976515	0.328809	0.98345
Bahd1	1199.3	0.211082	0.128672	1.64046	0.100909	0.896095
Baiap2	10158.3	0.137576	0.137088	1.00356	0.315589	0.98345
Baiap3	319.462	-0.156027	0.402956	-0.387205	0.698605	0.993404
Bak1	331.24	-0.135909	0.121077	-1.1225	0.261649	0.980357
Bambi	150.287	-0.370853	0.226366	-1.63829	0.101361	0.896095
Banf1	673.148	-0.0935069	0.101281	-0.923239	0.355883	0.990874
Bank1	315.246	0.397767	0.234027	1.69966	0.0891944	0.896095
Bap1	3756.67	0.13462	0.0726674	1.85255	0.0639472	0.832098
Bard1	100.806	-0.615747	0.464734	-1.32494	0.18519	0.968628
Barx2	193.584	0.0596853	0.359288	0.166121	0.868062	0.999164
Basp1	11276.9	0.0194685	0.0947411	0.205492	0.837188	0.999097
Bax	621.828	-0.0188261	0.0931007	-0.202212	0.839751	0.999097
Baz1a	460.18	0.465702	0.5812	0.801277	0.422971	0.992754
Baz1b	6077.88	0.0691984	0.0621373	1.11364	0.265434	0.982231
Baz2a	2363.98	-0.0235905	0.0678668	-0.3476	0.728141	0.99411
Baz2b	5515.56	0.18201	0.0750222	2.42609	0.0152627	0.551828
Bbc3	128.369	-0.323601	0.334252	-0.968135	0.332977	0.98345
Bbip1	1890.1	-0.0891228	0.124346	-0.71673	0.473541	0.993078
Bbof1	634.626	-0.135499	0.091832	-1.4755	0.140077	0.936583
Bbs1	1587.2	-0.0427101	0.0749354	-0.569959	0.568705	0.993078
Bbs10	213.974	0.113125	0.14859	0.761324	0.446464	0.992754
Bbs2	1187.2	-0.0888175	0.100035	-0.887868	0.374612	0.990874
Bbs4	2065.22	-0.148454	0.100473	-1.47755	0.139528	0.936583
Bbs5	923.516	0.105701	0.118347	0.893144	0.37178	0.990874
Bbs7	1286.17	0.00491674	0.0778847	0.0631285	0.949664	0.999941
Bbs9	2342.71	-0.0613162	0.11254	-0.544839	0.585864	0.993404
Bbx	4171.52	0.0686803	0.0843194	0.814526	0.415344	0.992637
BC003965	938.651	2.02191e-05	0.132301	0.000152827	0.999878	0.999941
BC031181	2648.17	0.0586719	0.0671468	0.873785	0.382236	0.990874
Bcam	197.263	0.0925769	0.150797	0.613916	0.539271	0.993078
Bcan	3433.41	-0.0506666	0.159033	-0.318592	0.750036	0.994993
Bcap29	1380.1	-0.159113	0.11497	-1.38395	0.166375	0.957367
Bcap31	1840.57	0.0260825	0.0705813	0.369539	0.711726	0.993404
Bcar1	1327.36	-0.188554	0.121928	-1.54644	0.121999	0.92338
Bcar3	718.104	-0.00969513	0.113582	-0.0853578	0.931977	0.999941
Bcas1	3676.8	-0.203829	0.0843265	-2.41714	0.0156428	0.558879
Bcas2	1649.87	-0.0317364	0.0883197	-0.359336	0.719344	0.993404
Bcas3	5463.39	-0.077585	0.168902	-0.45935	0.645983	0.993404
Bcat1	3546.72	0.128049	0.0751335	1.70429	0.0883275	0.896095
Bcat2	407.938	-0.125407	0.155802	-0.804909	0.420872	0.992754
Bccip	1394.77	0.28225	0.108034	2.6126	0.00898552	0.456372
Bcdin3d	136.427	0.0222001	0.181461	0.122341	0.902629	0.999728
Bche	293.881	0.2622	0.355287	0.737996	0.460517	0.992754
Bckdha	957.055	-0.235901	0.107699	-2.19038	0.0284967	0.691056
Bckdhb	2188.17	0.0260578	0.148841	0.175071	0.861024	0.999164
Bckdk	1003.65	-0.218343	0.07425	-2.94065	0.00327527	0.282398
Bcl10	489.356	0.0198034	0.153102	0.129347	0.897083	0.999728
Bcl11a	4940.25	-0.0457267	0.10046	-0.455172	0.648986	0.993404
Bcl11b	5097.98	0.081811	0.151279	0.540794	0.588649	0.993404
Bcl2	1903.7	0.178267	0.120765	1.47616	0.139902	0.936583
Bcl2l1	2927.3	-0.0927053	0.0610387	-1.5188	0.128814	0.924359
Bcl2l11	230.638	-0.359192	0.229005	-1.56849	0.116767	0.912187
Bcl2l12	64.5065	-0.0140603	0.290516	-0.0483977	0.961399	0.999941
Bcl2l13	1994.37	-0.0126229	0.071828	-0.175738	0.8605	0.999164
Bcl6	790.997	0.16305	0.194653	0.837645	0.40223	0.990874
Bcl7a	2221.6	-0.113789	0.114171	-0.996653	0.318933	0.98345
Bcl7b	1021.53	0.0207438	0.123961	0.167342	0.867101	0.999164
Bcl7c	383.77	-0.0944022	0.118886	-0.794059	0.427161	0.992754
Bcl9	1256.44	-0.0677446	0.120532	-0.562047	0.574084	0.993404
Bcl9l	461.183	-0.181067	0.145434	-1.24501	0.213126	0.970359
Bclaf1	10097	-0.0148568	0.140858	-0.105474	0.916	0.999728
Bco2	172.059	-0.0515103	0.232886	-0.221183	0.82495	0.999097
Bcor	1687.75	0.415302	0.200133	2.07512	0.037975	0.738081
Bcorl1	950.009	0.0137468	0.0771387	0.178209	0.858558	0.999164
Bcr	5229.38	0.0166651	0.125558	0.132728	0.894409	0.999728
Bcs1l	479.338	-0.0163885	0.0999923	-0.163897	0.869812	0.999164
Bdh1	2047.91	6.80042e-05	0.0676823	0.00100476	0.999198	0.999941
Bdnf	2163.69	1.43179	0.763615	1.87501	0.0607912	0.815583
Bdp1	4290.51	0.110795	0.0947496	1.16935	0.242263	0.980357
Bean1	394.007	0.00526418	0.131401	0.040062	0.968044	0.999941
Becn1	3696.56	0.0103461	0.0692295	0.149447	0.881201	0.999164
Begain	1338.43	0.0178086	0.113531	0.156861	0.875354	0.999164
Bend3	320.239	0.0975201	0.167937	0.580696	0.561446	0.993078
Bend4	619.818	0.0957028	0.14428	0.663314	0.50713	0.993078
Bend6	4194.02	-0.0566454	0.155691	-0.363832	0.715983	0.993404
Bend7	277.684	0.0481608	0.210709	0.228565	0.819207	0.999097
Bet1	867.861	-0.1162	0.130155	-0.892783	0.371974	0.990874
Bet1l	43.7545	0.416443	0.312765	1.33149	0.183029	0.96761
Bex1	1438.65	0.117307	0.206837	0.567149	0.570613	0.993078
Bex2	8406.3	-0.0928186	0.108404	-0.856227	0.391872	0.990874
Bex4	411.892	-0.00684699	0.174414	-0.039257	0.968685	0.999941
Bfar	1654.95	-0.0258409	0.0763872	-0.338288	0.735146	0.994774
Bfsp2	139.477	-0.311087	0.254671	-1.22153	0.221886	0.976807
Bgn	326.182	0.100807	0.31637	0.318637	0.750002	0.994993
Bhlhb9	3486.52	0.00710474	0.0981473	0.0723886	0.942293	0.999941
Bhlhe22	938.314	-0.0775362	0.110443	-0.702047	0.48265	0.993078
Bhlhe40	2211.58	0.262561	0.128494	2.04337	0.0410154	0.755503
Bhlhe41	1429.11	0.0789503	0.188014	0.419917	0.674546	0.993404
Bicc1	927.852	0.125401	0.125497	0.99924	0.317678	0.98345
Bicd1	7269.45	-0.0160949	0.0538963	-0.298626	0.765225	0.995823
Bicd2	2860.4	0.147904	0.102946	1.43672	0.150798	0.943624
Bid	378.775	-0.0702415	0.127259	-0.551956	0.580978	0.993404
Bin1	6927.01	0.0648012	0.0914355	0.70871	0.478505	0.993078
Bin2	169.322	-0.490551	0.389614	-1.25907	0.208005	0.969662
Bin3	714.66	-0.0217955	0.100951	-0.215903	0.829064	0.999097
Birc2	2282.9	0.0728304	0.073355	0.992849	0.320784	0.98345
Birc3	139.471	-0.11203	0.249382	-0.449232	0.653264	0.993404
Birc6	16607.4	0.0733541	0.0477842	1.53511	0.124756	0.924359
Bivm	1096.35	-0.0174202	0.0912818	-0.190839	0.848651	0.999164
Blcap	2526.91	0.102433	0.0920573	1.11271	0.265834	0.982231
Blm	406.538	-0.125419	0.135597	-0.924941	0.354996	0.990874
Blmh	2451.2	-0.0733977	0.0766939	-0.957022	0.338556	0.985055
Blnk	942.748	-0.0587514	0.71329	-0.0823668	0.934355	0.999941
Bloc1s1	578.807	-0.0403425	0.167029	-0.241531	0.809144	0.999097
Bloc1s2	748.771	-0.0439677	0.0927638	-0.473974	0.635518	0.993404
Bloc1s3	234.025	-0.202578	0.14036	-1.44327	0.148945	0.943382
Bloc1s4	197.153	0.103362	0.165172	0.625784	0.531457	0.993078
Bloc1s5	562.702	-0.0984667	0.126084	-0.780961	0.434825	0.992754
Bloc1s6	1073.31	-0.0410556	0.12266	-0.33471	0.737844	0.994993
Blvra	646.304	-0.0972795	0.102099	-0.952794	0.340695	0.985481
Blvrb	280.254	0.12984	0.154106	0.842537	0.399487	0.990874
Blzf1	977.327	0.0531955	0.112715	0.471947	0.636965	0.993404
Bmf	230.806	-0.26207	0.225688	-1.1612	0.24556	0.980357
Bmi1	2084.01	0.0889462	0.123035	0.722933	0.469721	0.993078
Bmp1	993.717	-0.267552	0.134076	-1.99552	0.0459866	0.770988
Bmp2	115.558	-0.055771	0.235722	-0.236597	0.812969	0.999097
Bmp2k	2153.29	-0.233024	0.366886	-0.63514	0.525337	0.993078
Bmp3	2005.33	-0.1378	0.447442	-0.307973	0.758103	0.994993
Bmp4	70.5209	0.296975	0.321761	0.922968	0.356024	0.990874
Bmp5	128.613	0.203584	0.288683	0.705215	0.480677	0.993078
Bmp6	433.129	0.514163	0.183761	2.798	0.00514198	0.351937
Bmp7	299.393	0.186444	0.197648	0.943313	0.345521	0.990581
Bmper	940.284	0.109729	0.11123	0.986505	0.323885	0.98345
Bmpr1a	4124.21	0.000159589	0.106727	0.00149531	0.998807	0.999941
Bmpr1b	3930.82	-0.0351386	0.214353	-0.163929	0.869787	0.999164
Bmpr2	15107.1	0.0402723	0.135311	0.297628	0.765987	0.995823
Bms1	1758	0.206895	0.0961303	2.15223	0.0313793	0.699693
Bmx	59.0243	-0.118814	0.387178	-0.306872	0.758941	0.995043
Bmyc	458.326	0.273207	0.208549	1.31004	0.190182	0.968628
Bnc2	481.637	0.465009	0.231296	2.01045	0.0443836	0.765416
Bnip1	504.609	-0.0480465	0.130665	-0.367708	0.713091	0.993404
Bnip2	1597.5	0.0451957	0.0946586	0.47746	0.633035	0.993404
Bnip3	3483.87	-0.131049	0.0687778	-1.9054	0.0567275	0.806754
Bnip3l	4710.9	-0.0910521	0.12008	-0.75826	0.448296	0.992754
Boc	932.287	-0.036579	0.10197	-0.358724	0.719801	0.993404
Bod1	1705.5	-0.0522078	0.0832982	-0.626758	0.530818	0.993078
Bod1l	6305.96	0.081369	0.0629947	1.29168	0.196468	0.968628
Bok	1421.43	0.235429	0.436019	0.539952	0.58923	0.993404
Bola1	291.627	0.112627	0.244223	0.461166	0.64468	0.993404
Bola2	1028.81	-0.0265048	0.14402	-0.184035	0.853986	0.999164
Bola3	505.093	-0.194548	0.10593	-1.83657	0.0662731	0.8351
Boll	48.7744	0.686643	0.410491	1.67273	0.0943798	0.896095
Bop1	1437.52	0.0532517	0.139139	0.382724	0.701925	0.993404
Bora	209.134	-0.0207077	0.185757	-0.111478	0.911238	0.999728
Borcs5	1115.29	-0.00711967	0.110082	-0.0646764	0.948432	0.999941
Borcs6	359.99	0.0761913	0.124279	0.613066	0.539833	0.993078
Borcs7	591.455	-0.0348625	0.121336	-0.287322	0.773866	0.997464
Borcs8	1111.11	-0.110787	0.116327	-0.952373	0.340908	0.985481
Bpgm	1679.98	-0.129625	0.0830761	-1.56032	0.118685	0.913987
Bphl	1020.09	-0.149434	0.0952441	-1.56896	0.116657	0.912187
Bpnt1	2619.79	-0.0017756	0.0895301	-0.0198324	0.984177	0.999941
Bptf	6322.3	0.0360259	0.0511422	0.704427	0.481167	0.993078
Braf	11167	0.00852561	0.102045	0.0835475	0.933416	0.999941
Brap	2446.04	0.0310406	0.0800346	0.387839	0.698135	0.993404
Brat1	707.221	-0.0561148	0.0834008	-0.672833	0.501054	0.993078
Brca1	127.528	-0.383437	0.316602	-1.2111	0.225857	0.979374
Brca2	462.186	-0.160614	0.160445	-1.00105	0.316801	0.98345
Brcc3	1871.18	0.064023	0.11245	0.569348	0.56912	0.993078
Brd1	2892.72	-0.0350642	0.0843179	-0.415858	0.677514	0.993404
Brd2	4537.21	0.0327568	0.0497412	0.658545	0.510188	0.993078
Brd3	1638.49	-0.0288278	0.0914228	-0.315324	0.752516	0.994993
Brd4	3433.51	-0.0672839	0.0756421	-0.889503	0.373733	0.990874
Brd7	1715.07	-0.031179	0.100378	-0.310617	0.756092	0.994993
Brd8	2737.09	-0.00446937	0.0934477	-0.0478275	0.961854	0.999941
Brd9	2871.65	0.0444399	0.123306	0.360405	0.718545	0.993404
Brdt	1082.7	-0.142793	0.124609	-1.14593	0.251823	0.980357
Bre	3291.01	-0.0540697	0.111672	-0.484184	0.628255	0.993404
Brf1	1444.18	-0.0917836	0.0802954	-1.14307	0.253008	0.980357
Brf2	411.327	0.0166926	0.119924	0.139194	0.889297	0.999616
Bri3	664.797	-0.0716629	0.0944273	-0.758921	0.4479	0.992754
Bri3bp	4857.18	-0.0133792	0.0938243	-0.142598	0.886607	0.999164
Brinp1	18972.3	0.211391	0.124337	1.70015	0.0891025	0.896095
Brinp2	5633.52	0.0775259	0.131865	0.587918	0.556587	0.993078
Brinp3	6692.97	-0.0467305	0.0983184	-0.475297	0.634575	0.993404
Brix1	717.922	0.199529	0.121901	1.63682	0.101669	0.896095
Brk1	4426.27	-0.098668	0.0868997	-1.13542	0.256198	0.980357
Brms1	522.797	-0.0231606	0.114356	-0.202531	0.839502	0.999097
Brms1l	2770.91	0.0824721	0.0549881	1.49982	0.133662	0.931266
Brox	3044.31	-0.0826626	0.0707761	-1.16795	0.242829	0.980357
Brpf1	1170.05	0.184568	0.0941892	1.95955	0.0500489	0.796847
Brpf3	1094.28	-0.144859	0.11315	-1.28024	0.20046	0.9688
Brsk1	4690.95	0.0957864	0.111833	0.856516	0.391713	0.990874
Brsk2	4756.72	-0.00985781	0.0759316	-0.129825	0.896705	0.999728
Brwd1	9571.78	0.0904317	0.0824321	1.09704	0.272622	0.982515
Brwd3	1815.1	-0.0597987	0.0898052	-0.665871	0.505493	0.993078
Bscl2	2272.65	-0.168454	0.0874632	-1.926	0.0541048	0.804282
Bsdc1	1599.71	-0.11681	0.0785468	-1.48714	0.136978	0.934319
Bsg	10637.5	-0.010489	0.108392	-0.0967691	0.92291	0.999941
Bsn	14754.5	-0.0678351	0.0916364	-0.740264	0.45914	0.992754
Bst2	196.177	-0.944952	0.909965	-1.03845	0.299061	0.98345
Btaf1	6373.71	0.190181	0.115462	1.64714	0.0995301	0.896095
Btbd1	5741.3	-0.0275983	0.104205	-0.264847	0.791127	0.999097
Btbd10	6323.78	0.0406212	0.097881	0.415006	0.678137	0.993404
Btbd11	731.795	-0.0884966	0.136239	-0.649568	0.515971	0.993078
Btbd16	59.7383	-0.0545433	0.279292	-0.195291	0.845165	0.999164
Btbd17	353.145	-0.00315406	0.218175	-0.0144565	0.988466	0.999941
Btbd19	216.561	-0.00951651	0.166262	-0.0572379	0.954356	0.999941
Btbd2	1285.05	-0.159777	0.13276	-1.2035	0.228784	0.98019
Btbd3	6640.48	-0.0379334	0.109366	-0.346848	0.728706	0.99411
Btbd6	871.019	-0.0564798	0.125985	-0.448305	0.653933	0.993404
Btbd7	2257.95	0.0440513	0.0760637	0.579137	0.562497	0.993078
Btbd9	6636.79	0.131793	0.148987	0.884596	0.376375	0.990874
Btd	274.919	-0.122909	0.127503	-0.963971	0.335061	0.98345
Btf3	3203	-0.00765225	0.0822114	-0.0930802	0.92584	0.999941
Btf3l4	2447.94	-0.065041	0.108637	-0.598701	0.549372	0.993078
Btg1	966.563	-0.188889	0.176208	-1.07197	0.283735	0.98345
Btg2	391.852	-0.212915	0.148799	-1.43089	0.15246	0.944824
Btg3	302.132	-0.0539919	0.23928	-0.225643	0.821479	0.999097
Btk	126.432	-0.493299	0.414949	-1.18882	0.234512	0.980357
Btla	63.1549	-0.265783	0.369984	-0.718362	0.472534	0.993078
Btrc	6952.11	0.0608629	0.0858062	0.709306	0.478135	0.993078
Bub1b	146.879	-0.536353	0.505941	-1.06011	0.289095	0.98345
Bub3	2021.28	0.200703	0.202251	0.992345	0.321029	0.98345
Bud13	294.149	0.0286716	0.146637	0.195528	0.84498	0.999164
Bud31	1299.66	-0.114337	0.098946	-1.15555	0.247865	0.980357
Bves	77.1653	0.183195	0.281563	0.650636	0.515281	0.993078
Bysl	810.652	0.117284	0.10086	1.16283	0.244898	0.980357
Bzrap1	6481.34	-0.0634864	0.0865713	-0.733343	0.463349	0.993078
Bzw1	8443.99	0.0642243	0.15703	0.408995	0.682543	0.993404
Bzw2	1982.04	-0.035196	0.0932879	-0.377284	0.705963	0.993404
C1d	2056.57	0.00322665	0.126078	0.0255925	0.979582	0.999941
C1galt1	1936.37	0.0536805	0.155464	0.345292	0.729875	0.99411
C1galt1c1	752.072	0.118189	0.131179	0.900975	0.367602	0.990874
C1qa	1442.6	-0.977395	0.739071	-1.32246	0.186014	0.968628
C1qb	1488.9	-0.771191	0.743852	-1.03675	0.299851	0.98345
C1qbp	875.388	-0.0753034	0.102863	-0.732077	0.464122	0.993078
C1qc	1585.12	-0.959039	0.753608	-1.2726	0.203161	0.9688
C1ql1	170.003	-0.127274	0.165875	-0.767287	0.442911	0.992754
C1ql3	3362.51	-0.0314018	0.193079	-0.162637	0.870804	0.999164
C1qtnf1	106.198	0.297324	0.228107	1.30344	0.192425	0.968628
C1qtnf4	1377.53	0.271931	0.191726	1.41833	0.156094	0.946822
C1qtnf7	86.9643	0.333428	0.250412	1.33152	0.183019	0.96761
C1ra	63.0277	-0.898144	0.437945	-2.05082	0.0402849	0.750749
C2cd2	566.399	-0.111644	0.10946	-1.01995	0.307752	0.98345
C2cd2l	2964.55	-0.212228	0.115278	-1.84101	0.0656203	0.833654
C2cd3	1642.51	-0.116539	0.108411	-1.07497	0.282389	0.983043
C2cd4c	264.575	-0.423402	0.222597	-1.9021	0.0571575	0.806754
C2cd5	5194.3	0.104043	0.0911845	1.14101	0.253865	0.980357
C3ar1	277.875	-1.35798	1.00009	-1.35785	0.174512	0.963133
C7	61.6314	-0.765011	0.306522	-2.49578	0.0125682	0.514338
C730034F03Rik	57.8233	0.630348	0.388997	1.62045	0.105137	0.896095
Caap1	1096.01	0.0803317	0.0915529	0.877435	0.380251	0.990874
Cab39	8637.98	-0.0581229	0.10175	-0.571232	0.567842	0.993078
Cab39l	1631.74	0.00149607	0.080747	0.0185279	0.985218	0.999941
Cabin1	4363.75	-0.0686918	0.111822	-0.614293	0.539021	0.993078
Cables1	1442.69	0.00484569	0.0736809	0.0657659	0.947564	0.999941
Cables2	800.251	-0.0257802	0.10518	-0.245105	0.806375	0.999097
Cabp1	2774.88	-0.0171542	0.121156	-0.141587	0.887406	0.999181
Cabp7	601.294	0.455236	0.280918	1.62053	0.105119	0.896095
Cabyr	66.2231	0.0577277	0.337777	0.170905	0.864299	0.999164
Cacfd1	1085.5	-0.014915	0.105568	-0.141283	0.887646	0.99922
Cachd1	968.991	-0.13846	0.150154	-0.92212	0.356466	0.990874
Cacna1a	6893.14	-0.0957714	0.115881	-0.826464	0.408541	0.991769
Cacna1b	7694.15	-0.0502629	0.119123	-0.421943	0.673067	0.993404
Cacna1c	14055.4	-0.000916538	0.138778	-0.00660434	0.994731	0.999941
Cacna1d	7106.4	-0.0747657	0.174573	-0.428278	0.668449	0.993404
Cacna1e	29210	0.133829	0.0980089	1.36548	0.172102	0.959979
Cacna1g	3457.32	0.350256	0.220542	1.58816	0.11225	0.909606
Cacna1h	1917.33	0.0129833	0.154031	0.0842905	0.932825	0.999941
Cacna1i	4371.21	0.0644519	0.0937422	0.687544	0.49174	0.993078
Cacna2d1	25982.5	-0.05283	0.102253	-0.516659	0.605395	0.993404
Cacna2d2	1475.23	0.280974	0.208871	1.34521	0.178559	0.965277
Cacna2d3	19068.6	4.08134e-05	0.128039	0.000318757	0.999746	0.999941
Cacna2d4	163.937	-0.390804	0.181082	-2.15816	0.0309155	0.699693
Cacnb1	2878.51	0.152558	0.0957767	1.59285	0.111193	0.907627
Cacnb2	11207.6	0.0257525	0.116732	0.220612	0.825395	0.999097
Cacnb3	3705.81	0.0525565	0.140576	0.373866	0.708504	0.993404
Cacnb4	18849	-0.0360365	0.129687	-0.277873	0.78111	0.999097
Cacng2	2256.01	0.0398347	0.0957071	0.416214	0.677253	0.993404
Cacng3	2877.08	-0.147457	0.145924	-1.01051	0.312252	0.98345
Cacng4	883.361	0.114277	0.240093	0.475969	0.634096	0.993404
Cacng5	986.935	0.0857997	0.210665	0.40728	0.683803	0.993404
Cacng7	1986.7	-0.0294419	0.139138	-0.211603	0.832417	0.999097
Cacng8	1954.55	-0.0892944	0.0840425	-1.06249	0.288013	0.98345
Cactin	451.99	0.0749211	0.121555	0.616357	0.537659	0.993078
Cacul1	3779.13	0.00601551	0.0745662	0.0806735	0.935702	0.999941
Cacybp	2699.6	0.272765	0.143581	1.89973	0.0574687	0.806754
Cad	627.434	0.122248	0.125951	0.9706	0.331748	0.98345
Cadm1	15919.6	0.105389	0.114676	0.919015	0.358088	0.990874
Cadm2	78549.8	-0.0269481	0.11542	-0.233478	0.81539	0.999097
Cadm3	11345.9	-0.0529282	0.102454	-0.516605	0.605432	0.993404
Cadm4	5418.02	-0.0175213	0.0912803	-0.19195	0.847781	0.999164
Cadps	29756.1	-0.041592	0.157979	-0.263276	0.792338	0.999097
Cadps2	8674.05	0.00410215	0.364115	0.0112661	0.991011	0.999941
Cage1	265.206	-0.00579791	0.151789	-0.0381972	0.96953	0.999941
Calb1	4947.4	0.0479998	0.108949	0.440569	0.659525	0.993404
Calb2	1295.61	0.333592	0.622583	0.53582	0.592083	0.993404
Calcoco1	1498.45	-0.127665	0.124479	-1.0256	0.305082	0.98345
Calcrl	455.791	0.0356384	0.1132	0.314828	0.752893	0.994993
Cald1	1111.49	0.20443	0.107367	1.90403	0.0569067	0.806754
Calhm2	335.791	0.00530974	0.138419	0.03836	0.969401	0.999941
Calm1	130127	0.186849	0.0880625	2.12178	0.0338562	0.715349
Calm2	61725.2	0.14827	0.139539	1.06257	0.287977	0.98345
Calm3	44777.9	0.186158	0.129573	1.4367	0.150803	0.943624
Caln1	15640.7	-0.0234384	0.164928	-0.142113	0.886991	0.999164
Calr	13536.9	0.180885	0.119359	1.51547	0.129654	0.924477
Calu	3661.87	0.0164618	0.0927209	0.177542	0.859083	0.999164
Caly	3246.84	-0.0341008	0.0914094	-0.373056	0.709107	0.993404
Camk1	1937.27	-0.10081	0.155796	-0.647062	0.517592	0.993078
Camk1d	10168.5	0.126629	0.0711139	1.78066	0.0749686	0.876549
Camk1g	1112.5	0.165248	0.127132	1.29982	0.193663	0.968628
Camk2a	35453.6	0.19268	0.14262	1.351	0.176695	0.965277
Camk2b	22581.1	0.0056222	0.114245	0.0492118	0.960751	0.999941
Camk2d	6465.17	-0.0788666	0.0784673	-1.00509	0.314854	0.98345
Camk2g	7822.98	-0.121559	0.0983319	-1.23621	0.216381	0.975164
Camk2n1	33178.7	0.101577	0.230775	0.440157	0.659824	0.993404
Camk2n2	581.866	-0.295313	0.108722	-2.71624	0.0066029	0.396763
Camk4	18992.1	-0.0704988	0.205433	-0.343172	0.731469	0.99411
Camkk1	3645.45	0.3636	0.143934	2.52617	0.0115315	0.508694
Camkk2	7550.02	-0.00482539	0.36628	-0.0131741	0.989489	0.999941
Camkmt	2046.64	0.112325	0.156801	0.716359	0.47377	0.993078
Camkv	13505.5	0.175456	0.208237	0.842578	0.399464	0.990874
Caml	1462.22	-0.0364083	0.114389	-0.318286	0.750268	0.994993
Camsap1	5256.22	0.0627434	0.05545	1.13153	0.257832	0.980357
Camsap2	11239.1	0.0594116	0.10103	0.58806	0.556492	0.993078
Camsap3	611.578	-0.00929264	0.0968913	-0.0959079	0.923594	0.999941
Camta1	11759.6	0.0208134	0.0811233	0.256565	0.797515	0.999097
Camta2	3384.13	-0.0656645	0.0873582	-0.751669	0.45225	0.992754
Cand1	8684.97	0.0605587	0.0672019	0.901146	0.367511	0.990874
Cand2	163.813	-0.375217	0.261439	-1.4352	0.15123	0.943624
Cant1	1252.78	-0.123328	0.105698	-1.1668	0.243293	0.980357
Canx	21876.3	0.0779879	0.0951551	0.819588	0.412451	0.991769
Cap1	9037.79	-0.0609187	0.114432	-0.532358	0.594478	0.993404
Cap2	9072.26	0.107867	0.122281	0.882126	0.377709	0.990874
Capg	110.837	-1.40233	0.671509	-2.08833	0.036768	0.731111
Capn1	595.734	-0.140503	0.156674	-0.896787	0.369832	0.990874
Capn10	722.947	-0.0305705	0.082334	-0.371299	0.710415	0.993404
Capn15	1329.73	0.0366221	0.0789643	0.463781	0.642805	0.993404
Capn2	2227.07	-0.0223128	0.13572	-0.164403	0.869414	0.999164
Capn3	309.052	-0.622718	0.30907	-2.01481	0.0439246	0.76519
Capn5	1267.26	-0.132744	0.171721	-0.773018	0.439512	0.992754
Capn6	125.066	0.176522	0.269912	0.653997	0.513114	0.993078
Capn7	2448.05	-0.00801264	0.0739631	-0.108333	0.913732	0.999728
Capns1	2720.8	-0.166575	0.163153	-1.02098	0.307265	0.98345
Caprin1	11658.5	0.111672	0.0829676	1.34597	0.178312	0.965277
Caprin2	423.099	-0.115962	0.150609	-0.769955	0.441327	0.992754
Capsl	47.9081	-0.462785	0.303796	-1.52334	0.127673	0.924359
Capza1	1957.81	-0.040778	0.10037	-0.406275	0.684541	0.993404
Capza2	10258.1	-0.14792	0.101207	-1.46156	0.143861	0.94226
Capzb	4565.73	-0.108754	0.0816729	-1.33159	0.182997	0.96761
Car10	12292.3	0.155362	0.15627	0.994191	0.32013	0.98345
Car11	3684.06	0.136747	0.196667	0.695323	0.486853	0.993078
Car12	1032.31	0.95825	0.654313	1.46451	0.143054	0.939321
Car13	69.476	0.296242	0.314776	0.94112	0.346643	0.990581
Car14	228.25	0.0794707	0.243445	0.326442	0.74409	0.994993
Car2	5068.08	-0.0558587	0.144994	-0.385249	0.700053	0.993404
Car4	454.375	-0.432692	0.167414	-2.58457	0.00975018	0.479971
Car5b	217.9	-0.629825	0.315019	-1.99932	0.0455735	0.770988
Car7	740.607	-0.108466	0.148624	-0.729802	0.465511	0.993078
Car8	715.021	-0.289592	0.230723	-1.25515	0.209425	0.969662
Card10	134.067	-0.078045	0.353188	-0.220973	0.825114	0.999097
Card19	165.686	-0.112667	0.203366	-0.55401	0.579572	0.993404
Card6	46.734	0.0350182	0.35071	0.0998493	0.920464	0.999941
Card9	80.8475	-0.407557	0.394012	-1.03438	0.30096	0.98345
Carf	1672.52	-0.110512	0.0969617	-1.13974	0.254393	0.980357
Carhsp1	1356.03	-0.164441	0.126004	-1.30505	0.191875	0.968628
Carkd	1336.72	-0.00567017	0.0784497	-0.0722778	0.942381	0.999941
Carm1	1622.81	-0.00703115	0.0634098	-0.110884	0.911708	0.999728
Carnmt1	813.495	0.0793604	0.103748	0.764934	0.444311	0.992754
Carns1	255.726	-0.185046	0.170022	-1.08837	0.276433	0.982515
Cars	1608.09	0.161414	0.0844094	1.91228	0.0558403	0.805809
Cars2	539.02	-0.0631945	0.129002	-0.489872	0.624225	0.993404
Cartpt	169.576	0.0540821	0.803962	0.0672695	0.946367	0.999941
Casc1	73.4779	-0.358239	0.281374	-1.27318	0.202956	0.9688
Casc3	1688.18	-0.0382013	0.0923625	-0.413602	0.679166	0.993404
Casc4	5976.14	-0.0459311	0.0809407	-0.567467	0.570397	0.993078
Casc5	96.6992	-1.18181	0.571717	-2.06712	0.0387228	0.744164
Casd1	3718.73	-0.020602	0.0996386	-0.206768	0.836191	0.999097
Cask	9870.92	-0.0650152	0.0715184	-0.909069	0.363314	0.990874
Caskin1	2385.37	0.00588794	0.0899536	0.0654553	0.947812	0.999941
Caskin2	404.22	0.106654	0.134302	0.794135	0.427117	0.992754
Casp1	70.0381	-0.327393	0.341548	-0.958557	0.337782	0.985055
Casp12	72.0217	-0.179629	0.314925	-0.570386	0.568416	0.993078
Casp2	760.561	-0.0696677	0.124908	-0.557753	0.577013	0.993404
Casp3	508.247	-0.198417	0.153219	-1.29499	0.195323	0.968628
Casp6	115.401	-0.0503601	0.235844	-0.213531	0.830913	0.999097
Casp7	165.955	-0.48826	0.249674	-1.95559	0.0505132	0.796847
Casp8	228.961	-0.375379	0.361695	-1.03783	0.299348	0.98345
Casp8ap2	1413.2	-0.0132686	0.0949681	-0.139716	0.888884	0.999616
Casp9	703.859	-0.0792085	0.110573	-0.716344	0.473779	0.993078
Casq2	127.518	-0.111385	0.312031	-0.356966	0.721117	0.993404
Cast	348.163	-0.0257706	0.117615	-0.219111	0.826564	0.999097
Casz1	79.019	0.24031	0.266015	0.90337	0.36633	0.990874
Cat	1591.65	-0.179517	0.116446	-1.54163	0.123164	0.924359
Catip	117.127	-0.317546	0.320544	-0.990647	0.321858	0.98345
Catsper2	360.452	-0.0680498	0.127858	-0.532228	0.594568	0.993404
Catsperd	82.2073	0.0408966	0.530067	0.0771537	0.938501	0.999941
Catsperg1	71.6071	-0.217662	0.310113	-0.70188	0.482754	0.993078
Cav1	519.986	-0.00416813	0.16396	-0.0254216	0.979719	0.999941
Cav2	1231.45	-0.130858	0.175711	-0.744735	0.456432	0.992754
Cbarp	3823.16	0.0625993	0.0704697	0.888316	0.374371	0.990874
Cbfa2t2	3635.1	-0.069569	0.0689458	-1.00904	0.312956	0.98345
Cbfa2t3	540.255	0.104855	0.137767	0.761103	0.446595	0.992754
Cbfb	1134.18	-0.101442	0.146011	-0.694754	0.487209	0.993078
Cbl	3796.79	0.00937342	0.0789732	0.118691	0.90552	0.999728
Cblb	2849.41	0.000848344	0.13951	0.00608089	0.995148	0.999941
Cbll1	1040.73	0.000111573	0.128977	0.00086506	0.99931	0.999941
Cbln1	263.305	-0.351532	0.312825	-1.12373	0.261127	0.980357
Cbln2	2205.49	0.100922	0.197228	0.511702	0.608859	0.993404
Cbln4	269.175	0.0249621	0.248704	0.100369	0.920051	0.999941
Cbr1	1081.3	-0.151743	0.102228	-1.48436	0.137714	0.934319
Cbr3	237.835	0.0128005	0.211084	0.0606416	0.951645	0.999941
Cbr4	689.34	-0.115949	0.100822	-1.15003	0.250131	0.980357
Cbs	682.344	0.153965	0.187762	0.820005	0.412213	0.991769
Cbwd1	863.043	0.0827446	0.0877152	0.943333	0.345511	0.990581
Cbx1	1992.46	0.213932	0.088934	2.40551	0.0161497	0.565903
Cbx2	82.2201	0.0102595	0.25748	0.039846	0.968216	0.999941
Cbx3	2860.41	-0.0225802	0.138477	-0.163061	0.87047	0.999164
Cbx4	1110.13	-0.093243	0.0987048	-0.944665	0.34483	0.990356
Cbx5	16380.2	0.0742639	0.0985132	0.753848	0.450941	0.992754
Cbx6	278.04	-0.203589	0.183938	-1.10684	0.268364	0.982515
Cbx7	955.641	-0.0451105	0.172729	-0.261164	0.793966	0.999097
Cbx8	265.557	-0.0325811	0.211555	-0.154008	0.877603	0.999164
Cby1	801.436	-0.00512526	0.113272	-0.0452475	0.96391	0.999941
Cc2d1a	1001	-0.136435	0.100271	-1.36066	0.173622	0.963133
Cc2d1b	1077.4	-0.152181	0.0893912	-1.70241	0.0886781	0.896095
Cc2d2a	1867.87	-0.14355	0.163936	-0.875649	0.381221	0.990874
Cc2d2b	43.0329	-0.145801	0.316557	-0.460585	0.645096	0.993404
Ccar1	3800.05	0.103326	0.0848826	1.21728	0.223499	0.976807
Ccar2	2888.72	-0.0622104	0.0808503	-0.769451	0.441625	0.992754
Ccbe1	794.991	0.106061	0.519659	0.204098	0.838277	0.999097
Ccdc102a	52.5581	-0.625748	0.369227	-1.69475	0.0901231	0.896095
Ccdc106	771.715	-0.0812525	0.109301	-0.743384	0.457249	0.992754
Ccdc107	424.565	-0.0809086	0.114132	-0.708903	0.478385	0.993078
Ccdc112	601.869	-0.00122619	0.122462	-0.0100128	0.992011	0.999941
Ccdc113	106.409	-0.150061	0.264934	-0.566409	0.571116	0.993078
Ccdc114	90.247	-0.210377	0.294542	-0.714251	0.475072	0.993078
Ccdc115	556.957	0.114166	0.102852	1.11	0.266999	0.982515
Ccdc116	70.8109	-0.48242	0.396345	-1.21717	0.223538	0.976807
Ccdc117	686.064	0.0402316	0.0966347	0.416327	0.677171	0.993404
Ccdc12	1317.73	0.0946636	0.0836929	1.13108	0.25802	0.980357
Ccdc120	245.117	-0.0634557	0.189649	-0.334597	0.737929	0.994993
Ccdc122	180.549	-0.115291	0.216589	-0.532305	0.594515	0.993404
Ccdc124	1729.42	0.302328	0.131587	2.29754	0.0215877	0.633584
Ccdc126	515.867	0.0292371	0.106022	0.275764	0.782729	0.999097
Ccdc127	3377.38	0.156436	0.112145	1.39495	0.163031	0.953673
Ccdc129	137.628	0.335842	0.274723	1.22247	0.221529	0.976807
Ccdc13	261.604	-0.141378	0.187493	-0.754043	0.450823	0.992754
Ccdc130	348.419	-0.0239186	0.142202	-0.168202	0.866425	0.999164
Ccdc134	446.321	-0.328322	0.101253	-3.2426	0.00118445	0.154691
Ccdc136	2086.75	-0.252162	0.115438	-2.18439	0.0289335	0.696321
Ccdc137	643.579	0.150013	0.112139	1.33775	0.180979	0.965277
Ccdc138	437.664	-0.0817616	0.128781	-0.634891	0.5255	0.993078
Ccdc14	204.305	-0.0945844	0.21664	-0.436597	0.662404	0.993404
Ccdc141	1478.55	0.0931829	0.158283	0.588711	0.556055	0.993078
Ccdc148	1607.75	-0.136101	0.124073	-1.09694	0.272667	0.982515
Ccdc149	2408.11	-0.0945553	0.122531	-0.771687	0.4403	0.992754
Ccdc15	346.039	0.00502913	0.165172	0.0304478	0.97571	0.999941
Ccdc151	163.069	-0.118001	0.176449	-0.668755	0.503652	0.993078
Ccdc155	142.383	0.0832846	0.238699	0.348911	0.727156	0.99393
Ccdc157	985.13	-0.12187	0.130069	-0.936966	0.348776	0.990581
Ccdc159	286.049	-0.33733	0.161764	-2.08532	0.0370404	0.732736
Ccdc160	58.1494	-0.0968044	0.266725	-0.362937	0.716652	0.993404
Ccdc163	106.855	0.00366893	0.270053	0.013586	0.98916	0.999941
Ccdc166	149.796	-0.133643	0.175145	-0.763043	0.445438	0.992754
Ccdc167	661.355	0.0760878	0.0964353	0.789004	0.43011	0.992754
Ccdc17	101.345	0.12202	0.231385	0.527346	0.597953	0.993404
Ccdc171	760.373	0.151316	0.195473	0.7741	0.438872	0.992754
Ccdc173	312.172	-0.117966	0.179943	-0.655578	0.512096	0.993078
Ccdc174	1024.68	0.0945469	0.0945291	1.00019	0.317219	0.98345
Ccdc177	591.3	-0.108454	0.125398	-0.864876	0.387107	0.990874
Ccdc18	175.091	-0.111401	0.199504	-0.558387	0.57658	0.993404
Ccdc181	818.507	0.184438	0.0962749	1.91574	0.0553976	0.805809
Ccdc184	345.075	0.0275705	0.215636	0.127857	0.898262	0.999728
Ccdc186	3191.27	0.0787226	0.0716324	1.09898	0.271777	0.982515
Ccdc187	117.022	-0.46276	0.376656	-1.2286	0.219221	0.976807
Ccdc190	235.822	-0.218949	0.28198	-0.776471	0.437471	0.992754
Ccdc191	530.043	-0.0441624	0.150818	-0.29282	0.76966	0.996395
Ccdc25	1928.23	0.136959	0.0830193	1.64973	0.0989984	0.896095
Ccdc28a	921.515	-0.279013	0.126533	-2.20507	0.0274493	0.683669
Ccdc28b	705.361	-0.0448063	0.134235	-0.33379	0.738538	0.994993
Ccdc3	803.451	0.100941	0.473626	0.213123	0.831231	0.999097
Ccdc30	1295.52	0.0177886	0.0822082	0.216385	0.828688	0.999097
Ccdc32	1289.75	-0.0440946	0.113486	-0.388545	0.697613	0.993404
Ccdc34	787.278	0.00734476	0.0996442	0.0737098	0.941241	0.999941
Ccdc39	1303.53	-0.118678	0.105617	-1.12366	0.261156	0.980357
Ccdc40	63.3642	0.180135	0.334791	0.538051	0.590542	0.993404
Ccdc43	903.943	-0.0258147	0.0814262	-0.317032	0.751219	0.994993
Ccdc47	3382.5	0.173561	0.0767164	2.26237	0.0236747	0.668902
Ccdc50	3706.5	0.0120134	0.0926367	0.129683	0.896818	0.999728
Ccdc51	243.583	-0.00643846	0.148037	-0.0434921	0.965309	0.999941
Ccdc57	704.646	-0.174231	0.11711	-1.48776	0.136815	0.934319
Ccdc58	666.343	-0.0714695	0.0922915	-0.774388	0.438701	0.992754
Ccdc59	930.284	0.139566	0.113666	1.22786	0.219498	0.976807
Ccdc6	2221.39	0.0987275	0.127076	0.776915	0.437209	0.992754
Ccdc60	70.1148	-0.333139	0.254041	-1.31136	0.189736	0.968628
Ccdc61	248.162	-0.0208656	0.142558	-0.146365	0.883633	0.999164
Ccdc62	202.72	-0.199768	0.223733	-0.892884	0.371919	0.990874
Ccdc65	231.987	-0.31166	0.164895	-1.89005	0.0587513	0.808214
Ccdc66	1130.21	0.217679	0.0745321	2.9206	0.00349355	0.295183
Ccdc71	758.756	-0.142785	0.098653	-1.44734	0.147801	0.943382
Ccdc71l	683.044	-0.0302629	0.161408	-0.187494	0.851273	0.999164
Ccdc73	83.3747	0.602068	0.223579	2.69287	0.00708407	0.410267
Ccdc74a	716.18	-0.484519	0.29778	-1.6271	0.103715	0.896095
Ccdc77	398.375	-0.0907	0.140883	-0.643796	0.519708	0.993078
Ccdc8	69.4878	-0.0706283	0.253726	-0.278364	0.780733	0.999097
Ccdc80	740.91	-0.0696092	0.284262	-0.244877	0.806552	0.999097
Ccdc82	1055.12	0.0508853	0.144319	0.352588	0.724397	0.993404
Ccdc84	326.22	0.0377388	0.130728	0.288683	0.772824	0.997464
Ccdc85a	5746.95	0.0142539	0.16487	0.0864554	0.931104	0.999941
Ccdc85b	130.232	0.383159	0.582701	0.657556	0.510824	0.993078
Ccdc85c	419.486	-0.0129956	0.162122	-0.0801593	0.936111	0.999941
Ccdc86	186.557	-0.183029	0.233212	-0.784815	0.432562	0.992754
Ccdc87	74.6722	-0.22568	0.276933	-0.814926	0.415115	0.992637
Ccdc88a	10194.6	0.0164865	0.0890355	0.185168	0.853097	0.999164
Ccdc88b	121.545	-0.267484	0.501232	-0.533653	0.593581	0.993404
Ccdc88c	1803.37	0.254803	0.15822	1.61043	0.107303	0.901542
Ccdc9	969.177	0.385978	0.153848	2.50882	0.0121135	0.511684
Ccdc90b	735.984	-0.106345	0.118526	-0.897229	0.369597	0.990874
Ccdc91	2124.54	0.0841111	0.0776646	1.083	0.278806	0.982637
Ccdc92	1559.26	-0.00935048	0.0769083	-0.12158	0.903232	0.999728
Ccdc92b	908.323	-0.0601725	0.111724	-0.538579	0.590177	0.993404
Ccdc93	1853.16	0.0698799	0.106429	0.656589	0.511445	0.993078
Ccdc94	219.849	0.141769	0.159017	0.891534	0.372643	0.990874
Ccdc96	73.7982	-0.205985	0.28076	-0.733668	0.463151	0.993078
Ccdc97	884.045	0.101757	0.0827897	1.2291	0.219033	0.976807
Cchcr1	161.144	-0.320171	0.277511	-1.15372	0.248614	0.980357
Cck	6520.51	0.150713	0.389731	0.386712	0.698969	0.993404
Cckbr	1328.6	-0.183719	0.144304	-1.27314	0.202969	0.9688
Ccl25	859.281	-0.05057	0.103079	-0.490593	0.623714	0.993404
Ccl27a	2434.23	0.0949231	0.14809	0.640984	0.521533	0.993078
Ccl28	68.6262	-0.343506	0.364889	-0.941398	0.346501	0.990581
Ccm2	1611.76	-0.0212199	0.0904216	-0.234678	0.814459	0.999097
Ccm2l	69.269	0.526782	0.317685	1.65819	0.0972792	0.896095
Ccna2	117.068	-0.619515	0.511874	-1.21029	0.226168	0.979374
Ccnb1	228.546	0.0520846	0.443488	0.117443	0.906509	0.999728
Ccnb2	81.4213	-0.718004	0.482904	-1.48685	0.137055	0.934319
Ccnc	2389.84	-0.00169095	0.115282	-0.0146679	0.988297	0.999941
Ccnd1	1805.15	-0.170361	0.363231	-0.469014	0.63906	0.993404
Ccnd2	2614.49	0.0255971	0.113303	0.225918	0.821265	0.999097
Ccnd3	515.611	0.189561	0.187704	1.00989	0.312547	0.98345
Ccndbp1	1471.58	-0.0255424	0.0771716	-0.330981	0.740659	0.994993
Ccne1	426.879	0.0340971	0.142176	0.239823	0.810467	0.999097
Ccne2	400.34	-0.159222	0.153523	-1.03712	0.299679	0.98345
Ccnf	231.339	0.0322563	0.373546	0.0863516	0.931187	0.999941
Ccng1	3967.51	-0.114211	0.173433	-0.658528	0.510199	0.993078
Ccng2	1654.95	0.146867	0.135169	1.08654	0.277241	0.982515
Ccnh	2785.25	0.0855229	0.118911	0.719215	0.472008	0.993078
Ccni	6470.13	-0.104782	0.071189	-1.47188	0.141053	0.937871
Ccnj	464.192	0.0707262	0.132091	0.535435	0.592349	0.993404
Ccnjl	209.786	0.0271504	0.182049	0.149138	0.881445	0.999164
Ccnk	827.415	0.0259926	0.0860475	0.302072	0.762597	0.995823
Ccnl1	2159.72	-0.00416181	0.141165	-0.0294819	0.97648	0.999941
Ccnl2	2359.7	0.0365783	0.0917495	0.398676	0.690132	0.993404
Ccno	37.5942	-0.658271	0.493643	-1.3335	0.182369	0.96761
Ccnt1	3004.23	0.129971	0.0871512	1.49133	0.135874	0.933878
Ccnt2	5044.71	0.0972603	0.0746796	1.30237	0.192791	0.968628
Ccny	9491.2	0.0345762	0.0786048	0.439874	0.660028	0.993404
Ccnyl1	1514.6	-0.0239205	0.122391	-0.195444	0.845046	0.999164
Ccp110	3283.14	0.118722	0.138364	0.858041	0.39087	0.990874
Ccpg1os	208.04	-0.248536	0.190345	-1.30571	0.19165	0.968628
Ccr5	259.828	-0.179816	0.369311	-0.486896	0.626332	0.993404
Ccr9	37.4441	1.04832	0.368466	2.84509	0.00443983	0.326583
Ccs	708.412	-0.0971062	0.107018	-0.90738	0.364206	0.990874
Ccsap	1754.06	-0.067946	0.123184	-0.551581	0.581235	0.993404
Ccser1	18264.1	0.256602	0.139549	1.83879	0.0659456	0.834863
Ccser2	7239.18	-0.0161442	0.0639058	-0.252625	0.800558	0.999097
Cct2	5445.84	0.0618835	0.078695	0.786371	0.43165	0.992754
Cct3	4483.17	0.108773	0.0774437	1.40455	0.160155	0.952079
Cct4	4358.51	0.183302	0.0865161	2.11871	0.034115	0.715349
Cct5	5413.16	-0.0382234	0.0789549	-0.484117	0.628303	0.993404
Cct7	6014.32	0.0871061	0.0759539	1.14683	0.251452	0.980357
Cct8	6850.56	0.0835827	0.0766421	1.09056	0.275467	0.982515
Ccz1	1456.52	-0.0594167	0.0650962	-0.912753	0.361372	0.990874
Cd14	64.8255	-0.727759	0.490897	-1.48251	0.138205	0.934435
Cd151	762.111	-0.0722002	0.199518	-0.361872	0.717448	0.993404
Cd163	76.0357	0.668257	0.339546	1.96809	0.0490573	0.790368
Cd164	2434.56	0.023581	0.120953	0.19496	0.845424	0.999164
Cd164l2	155.618	0.423242	0.225454	1.87728	0.0604793	0.81497
Cd180	329.845	-1.61872	0.933246	-1.73451	0.0828278	0.887558
Cd200	3191.95	-0.0753691	0.0607956	-1.23971	0.215082	0.973094
Cd200r1	140.835	0.0968211	0.457045	0.211841	0.832231	0.999097
Cd200r4	67.0253	0.136188	0.57187	0.238145	0.811769	0.999097
Cd248	51.1939	0.176027	0.308515	0.570563	0.568296	0.993078
Cd24a	504.184	-0.453744	0.280977	-1.61488	0.106337	0.899213
Cd274	97.7124	-0.274348	0.357565	-0.767267	0.442923	0.992754
Cd276	428.362	0.0214756	0.131978	0.16272	0.870739	0.999164
Cd2ap	2514.05	0.0686054	0.101966	0.672826	0.501058	0.993078
Cd2bp2	2580.61	0.0524224	0.0952946	0.550108	0.582245	0.993404
Cd300a	84.6489	0.147332	0.354472	0.415638	0.677675	0.993404
Cd302	534.124	-0.130046	0.123577	-1.05235	0.29264	0.98345
Cd320	546.667	-0.107994	0.127677	-0.845836	0.397644	0.990874
Cd33	454.33	-0.246792	0.350975	-0.703161	0.481956	0.993078
Cd34	2006.39	-0.282343	0.342219	-0.825036	0.409351	0.991769
Cd36	72.2911	-0.456795	0.258944	-1.76407	0.0777203	0.877091
Cd37	121.935	-0.81566	0.45506	-1.79243	0.0730649	0.864286
Cd38	297.053	0.0616276	0.307202	0.200609	0.841004	0.999097
Cd3eap	507.457	-0.034181	0.142909	-0.23918	0.810966	0.999097
Cd4	287.434	0.11491	0.825704	0.139166	0.889319	0.999616
Cd44	527.25	-0.287933	1.1562	-0.249034	0.803335	0.999097
Cd46	1099.45	-0.0340129	0.124779	-0.272585	0.785173	0.999097
Cd47	6844.6	-0.0933102	0.0958218	-0.973789	0.330161	0.98345
Cd48	59.1419	-0.713836	0.636078	-1.12225	0.261758	0.980357
Cd52	148.569	-1.58424	1.09753	-1.44347	0.148889	0.943382
Cd53	513.357	-0.823809	0.617992	-1.33304	0.182518	0.96761
Cd55	391.545	0.161879	0.158331	1.02241	0.306587	0.98345
Cd59a	253.62	0.0516102	0.284321	0.181521	0.855959	0.999164
Cd59b	75.8597	-0.149328	0.256774	-0.581554	0.560867	0.993078
Cd6	79.2836	-0.817379	0.301829	-2.70808	0.00676734	0.402861
Cd63	1192.19	-0.059803	0.399143	-0.149828	0.8809	0.999164
Cd68	400.192	-1.21586	0.782806	-1.55321	0.120373	0.919519
Cd72	67.8212	-0.839664	0.572416	-1.46688	0.142409	0.939117
Cd74	67.6387	0.287427	0.436616	0.658306	0.510341	0.993078
Cd80	53.6642	0.157194	0.313983	0.500646	0.61662	0.993404
Cd81	9771.12	-0.232167	0.160916	-1.44279	0.149081	0.943382
Cd82	507.64	-0.153566	0.117389	-1.30819	0.19081	0.968628
Cd83	354.479	-0.191557	0.187502	-1.02163	0.306956	0.98345
Cd84	361.931	-0.759202	0.733567	-1.03495	0.300694	0.98345
Cd86	211.861	-0.238043	0.365922	-0.650528	0.515351	0.993078
Cd9	2070.92	-0.408275	0.553043	-0.738234	0.460372	0.992754
Cd93	380.259	0.280064	0.28862	0.970358	0.331868	0.98345
Cd99l2	3749.33	0.00769091	0.0843649	0.0911624	0.927364	0.999941
Cda	77.2823	0.147536	0.259172	0.569259	0.56918	0.993078
Cdadc1	1824.93	0.0578711	0.0907436	0.637743	0.523641	0.993078
Cdan1	811.943	0.00375251	0.0924077	0.0406082	0.967608	0.999941
Cdc123	2703.86	0.0294314	0.0581547	0.506088	0.612795	0.993404
Cdc14a	335.218	-0.0197534	0.167286	-0.118082	0.906003	0.999728
Cdc14b	855.284	-0.0694014	0.12855	-0.539879	0.58928	0.993404
Cdc16	2122.04	-0.0459473	0.0592707	-0.775212	0.438215	0.992754
Cdc23	1870.9	0.0433305	0.0634707	0.682685	0.494806	0.993078
Cdc25a	206.496	-0.0101127	0.191617	-0.0527754	0.957911	0.999941
Cdc25b	280.246	-0.16164	0.203541	-0.79414	0.427114	0.992754
Cdc26	748.722	0.12665	0.108314	1.16928	0.242291	0.980357
Cdc27	4952.45	-0.148549	0.0797307	-1.86313	0.0624438	0.826493
Cdc34	880.119	0.0797749	0.104649	0.762313	0.445873	0.992754
Cdc37	2028.78	0.025618	0.0874141	0.293065	0.769473	0.996395
Cdc37l1	3971.77	0.0163879	0.102721	0.159537	0.873246	0.999164
Cdc40	2431.09	-0.153841	0.0697479	-2.20567	0.0274074	0.683669
Cdc42	12203.8	-0.101588	0.0902779	-1.12528	0.260472	0.980357
Cdc42bpa	19756	0.0308898	0.0590503	0.52311	0.600898	0.993404
Cdc42bpb	5296.99	-0.11843	0.0748436	-1.58236	0.113567	0.912187
Cdc42bpg	144.35	0.0147664	0.195408	0.075567	0.939764	0.999941
Cdc42ep1	376.802	-0.125208	0.153837	-0.8139	0.415702	0.992754
Cdc42ep2	294.044	-0.313219	0.157118	-1.99353	0.0462032	0.770988
Cdc42ep3	657.899	-0.128786	0.202307	-0.636585	0.524395	0.993078
Cdc42ep4	990.664	-0.295904	0.194987	-1.51756	0.129125	0.924359
Cdc42se1	1680.49	0.0245643	0.116511	0.210833	0.833018	0.999097
Cdc42se2	7332.8	-0.0506872	0.107932	-0.469622	0.638625	0.993404
Cdc45	91.1319	-0.200301	0.314024	-0.637853	0.523569	0.993078
Cdc5l	2703.59	0.0187693	0.073652	0.254838	0.798849	0.999097
Cdc7	672.449	0.155566	0.107975	1.44076	0.149651	0.94354
Cdc73	4445.88	0.0123232	0.0723318	0.17037	0.864719	0.999164
Cdca4	305.65	-0.118864	0.147449	-0.80614	0.420162	0.992754
Cdca7	217.669	0.0870662	0.199539	0.436337	0.662592	0.993404
Cdca7l	109.417	0.225455	0.328041	0.687276	0.491909	0.993078
Cdca8	76.6648	-0.393045	0.441522	-0.890205	0.373356	0.990874
Cdh1	75.4039	0.568286	0.260173	2.18426	0.0289431	0.696321
Cdh10	8395.46	0.0369805	0.175082	0.211218	0.832717	0.999097
Cdh11	9298.05	0.0909	0.0899917	1.01009	0.312451	0.98345
Cdh12	7123.95	-0.10804	0.205647	-0.525368	0.599327	0.993404
Cdh13	7869.41	-0.0852771	0.196101	-0.434863	0.663662	0.993404
Cdh18	10802.2	-0.00606741	0.149196	-0.0406675	0.967561	0.999941
Cdh19	840.31	-0.0290744	0.180489	-0.161087	0.872025	0.999164
Cdh2	9506.31	-0.0145141	0.130905	-0.110875	0.911716	0.999728
Cdh20	3529.2	0.0111364	0.194786	0.0571728	0.954408	0.999941
Cdh22	1226.58	0.199554	0.089597	2.22724	0.0259315	0.678091
Cdh23	158.138	0.578753	0.202152	2.86296	0.00419705	0.317858
Cdh24	213.934	0.558016	0.176816	3.15591	0.00159999	0.187874
Cdh4	2008.43	0.21957	0.144352	1.52107	0.128243	0.924359
Cdh5	313.227	0.110931	0.192742	0.575539	0.564927	0.993078
Cdh6	1137.61	-0.0100813	0.12743	-0.0791122	0.936943	0.999941
Cdh7	2137.87	-0.237026	0.0814328	-2.91069	0.00360628	0.297786
Cdh8	6082.71	-0.00555506	0.111474	-0.049833	0.960256	0.999941
Cdh9	3151.12	-0.0907674	0.19451	-0.466646	0.640753	0.993404
Cdhr1	1197.1	0.239249	0.559239	0.427812	0.668788	0.993404
Cdhr3	88.1097	-0.293992	0.297008	-0.989845	0.32225	0.98345
Cdip1	6313.77	-0.031084	0.0892214	-0.348391	0.727546	0.994086
Cdipt	2816.59	-0.0231186	0.0595279	-0.388367	0.697745	0.993404
Cdk11b	1864.12	0.129686	0.102856	1.26084	0.207365	0.969662
Cdk12	3313.71	0.0298098	0.0582203	0.512017	0.608639	0.993404
Cdk13	5316.46	0.0838609	0.0710847	1.17973	0.238107	0.980357
Cdk14	17132.3	0.0241041	0.136473	0.176621	0.859806	0.999164
Cdk15	53.7225	-0.121747	0.340623	-0.357425	0.720774	0.993404
Cdk16	5218.99	-0.0681249	0.0644154	-1.05759	0.290244	0.98345
Cdk17	14454	-0.0759777	0.0813494	-0.933967	0.350321	0.990667
Cdk18	1024.91	0.121218	0.403176	0.300658	0.763676	0.995823
Cdk19	4873.54	0.0300254	0.0796179	0.377119	0.706085	0.993404
Cdk2	88.4191	-0.443087	0.335319	-1.32139	0.186372	0.968628
Cdk20	236.809	-0.129651	0.199233	-0.650752	0.515207	0.993078
Cdk2ap1	1082.88	-0.184604	0.104815	-1.76123	0.078199	0.877091
Cdk2ap2	295.293	0.113106	0.139553	0.810488	0.41766	0.992754
Cdk4	1019.3	-0.103239	0.0853865	-1.20908	0.226633	0.979374
Cdk5	2382.79	-0.0337011	0.0649336	-0.519009	0.603755	0.993404
Cdk5r1	7471.36	-0.0680996	0.125833	-0.541192	0.588375	0.993404
Cdk5rap1	677.195	0.268688	0.15477	1.73604	0.0825565	0.887374
Cdk5rap2	1678.31	-0.130459	0.142567	-0.915067	0.360156	0.990874
Cdk5rap3	598.935	-0.235785	0.115027	-2.04983	0.0403812	0.750749
Cdk6	435.664	-0.335389	0.314234	-1.06732	0.285826	0.98345
Cdk7	3110.4	0.0563405	0.100421	0.561043	0.574768	0.993404
Cdk8	2774.02	0.0471182	0.0816387	0.577155	0.563835	0.993078
Cdk9	1444.65	0.0911455	0.111377	0.818347	0.413159	0.991769
Cdkal1	3950.36	0.134151	0.139003	0.965096	0.334497	0.98345
Cdkl1	801.337	-0.278505	0.139368	-1.99834	0.04568	0.770988
Cdkl2	2059.11	-0.0596254	0.103057	-0.57857	0.562879	0.993078
Cdkl3	677.786	-0.0161454	0.108233	-0.149173	0.881417	0.999164
Cdkl4	587.141	-0.106024	0.143267	-0.740047	0.459272	0.992754
Cdkl5	15650.1	-0.0933904	0.112851	-0.827555	0.407923	0.991769
Cdkn1a	376.313	1.13979	0.646666	1.76257	0.0779737	0.877091
Cdkn1b	1755.47	0.00520781	0.129983	0.0400653	0.968041	0.999941
Cdkn1c	91.6579	-0.374741	0.276802	-1.35382	0.175792	0.963684
Cdkn2aip	747.221	-0.081864	0.165313	-0.495205	0.620455	0.993404
Cdkn2aipnl	979.784	-0.0058756	0.117748	-0.0498997	0.960202	0.999941
Cdkn2c	109.135	-0.655208	0.379147	-1.72811	0.0839685	0.893361
Cdkn2d	978.186	-0.147869	0.0920331	-1.60669	0.108122	0.903296
Cdnf	76.8464	-0.12161	0.282392	-0.430641	0.66673	0.993404
Cdo1	981.754	0.230156	0.211425	1.08859	0.276333	0.982515
Cdon	1301.94	0.0754024	0.117639	0.640967	0.521544	0.993078
Cdpf1	240.644	-0.113547	0.144183	-0.787517	0.430979	0.992754
Cdr2	348.217	0.230728	0.220622	1.0458	0.295651	0.98345
Cdr2l	719.456	-0.127677	0.126646	-1.00814	0.313385	0.98345
Cds1	2828.53	-0.0218164	0.104378	-0.209013	0.834438	0.999097
Cds2	18677.8	-0.154774	0.107134	-1.44468	0.148549	0.943382
Cdv3	3138.91	-0.0500549	0.104052	-0.481055	0.630477	0.993404
Cdyl	2004.5	0.183145	0.12244	1.49579	0.134709	0.933435
Cdyl2	1218.16	0.309602	0.187319	1.65281	0.0983694	0.896095
Ceacam1	67.7978	0.163705	0.301047	0.543785	0.586589	0.993404
Cebpa	157.426	-0.270565	0.351761	-0.769173	0.44179	0.992754
Cebpd	78.8857	-0.15747	0.594626	-0.264822	0.791147	0.999097
Cebpg	1546.16	0.0321748	0.145598	0.220983	0.825105	0.999097
Cebpz	1869.69	0.118295	0.126545	0.934802	0.34989	0.990667
Cebpzos	624.766	-0.0870435	0.117679	-0.739669	0.459501	0.992754
Cecr2	411.175	0.122362	0.129313	0.946243	0.344025	0.989477
Cecr5	1642.07	-0.134878	0.0911574	-1.47962	0.138974	0.935682
Cecr6	1850.38	0.0789765	0.153979	0.512905	0.608018	0.993404
Cela1	67.5978	-0.822877	0.508012	-1.6198	0.105276	0.896095
Celf1	12010	-0.122755	0.102723	-1.19501	0.232083	0.980357
Celf2	111654	0.0121021	0.136414	0.0887162	0.929307	0.999941
Celf3	2535.9	0.0104033	0.137082	0.075891	0.939506	0.999941
Celf4	19406.9	0.144911	0.0958721	1.5115	0.130661	0.926715
Celf5	4138.83	0.0973284	0.0721328	1.34929	0.177243	0.965277
Celf6	634.125	-0.0658897	0.110801	-0.594666	0.552067	0.993078
Celsr1	243.883	-0.217703	0.222507	-0.97841	0.327872	0.98345
Celsr2	8153.69	-0.13743	0.150792	-0.911382	0.362094	0.990874
Celsr3	2442.99	0.0202624	0.0923066	0.219512	0.826251	0.999097
Cemip	18416.7	0.410612	0.189197	2.17029	0.0299847	0.699693
Cend1	7326.94	-0.129058	0.0823756	-1.5667	0.117184	0.912187
Cenpa	71.6143	-1.06507	0.527019	-2.02092	0.0432877	0.76519
Cenpc1	1925.74	-0.0773867	0.0703126	-1.10061	0.271067	0.982515
Cenpe	174.926	-0.733133	0.464969	-1.57673	0.114857	0.912187
Cenpf	182.075	-0.974659	0.947623	-1.02853	0.3037	0.98345
Cenpi	56.2943	-0.972194	0.506485	-1.91949	0.054922	0.805809
Cenpj	203.277	-0.0819948	0.20806	-0.394091	0.693514	0.993404
Cenpk	84.6162	-0.15003	0.278541	-0.538628	0.590144	0.993404
Cenpl	63.7602	-0.55113	0.31542	-1.74729	0.0805873	0.884059
Cenpm	56.1201	-0.337812	0.354943	-0.951735	0.341231	0.985873
Cenpo	249.542	-0.0783899	0.191159	-0.410077	0.681749	0.993404
Cenpp	446.339	-0.127022	0.173743	-0.731091	0.464724	0.993078
Cenpq	197.102	-0.107359	0.173727	-0.617976	0.536591	0.993078
Cenpt	423.296	0.0416901	0.153425	0.27173	0.78583	0.999097
Cenpu	144.234	-0.40537	0.29269	-1.38498	0.166058	0.957367
Cenpv	752.2	-0.0164171	0.116687	-0.140694	0.888112	0.999292
Cenpw	171.561	-0.134388	0.18347	-0.732481	0.463875	0.993078
Cep104	1089.52	0.0990824	0.0801951	1.23552	0.216638	0.975305
Cep112	2297.8	-0.0366864	0.148469	-0.247097	0.804833	0.999097
Cep120	2382.06	0.0238983	0.0690759	0.345972	0.729364	0.99411
Cep126	1505.82	0.0645988	0.0887244	0.728084	0.466562	0.993078
Cep128	901.315	-0.180016	0.163067	-1.10394	0.269619	0.982515
Cep131	672.299	-0.114231	0.15812	-0.722431	0.47003	0.993078
Cep135	751.052	-0.0232215	0.0995191	-0.233337	0.815499	0.999097
Cep152	371.075	-0.18988	0.194214	-0.977684	0.328231	0.98345
Cep162	1181.24	-0.0245912	0.101818	-0.24152	0.809152	0.999097
Cep164	888.674	-0.0474207	0.100688	-0.470967	0.637664	0.993404
Cep170	7861.99	0.0713471	0.072163	0.988692	0.322814	0.98345
Cep170b	5743.97	0.108974	0.110952	0.982175	0.326014	0.98345
Cep19	2068.81	-0.0123848	0.0778075	-0.159173	0.873533	0.999164
Cep192	827.248	-0.0664926	0.188842	-0.352106	0.724759	0.993404
Cep250	1223.96	-0.0524899	0.114391	-0.458863	0.646333	0.993404
Cep290	2112.91	0.0904011	0.0715123	1.26413	0.206182	0.969662
Cep295	7461.06	1.91286	0.0832072	22.9891	5.98718e-117	7.66299e-113
Cep350	5495.15	0.00687633	0.0482845	0.142413	0.886754	0.999164
Cep41	323.179	0.180322	0.18662	0.966253	0.333918	0.98345
Cep44	652.911	-0.178148	0.105063	-1.69562	0.0899573	0.896095
Cep57	884.919	-0.0330393	0.0923789	-0.35765	0.720605	0.993404
Cep57l1	623.445	-0.0214445	0.0866737	-0.247416	0.804586	0.999097
Cep63	1161.76	0.0691094	0.127627	0.541494	0.588167	0.993404
Cep68	1531.39	0.0109938	0.0759246	0.144799	0.88487	0.999164
Cep70	1411.21	0.0587815	0.0977079	0.601604	0.547438	0.993078
Cep72	91.6576	-0.372314	0.223006	-1.66952	0.0950134	0.896095
Cep76	417.599	-0.125744	0.128247	-0.980479	0.32685	0.98345
Cep78	730.96	-0.0285354	0.0953648	-0.299223	0.76477	0.995823
Cep83	3004.81	0.108387	0.110082	0.9846	0.324821	0.98345
Cep85	1073.9	0.0415355	0.0965814	0.430057	0.667154	0.993404
Cep85l	2173.73	0.00357702	0.082306	0.0434601	0.965335	0.999941
Cep89	704.863	0.0256259	0.126559	0.202482	0.83954	0.999097
Cep95	784.502	-0.00659956	0.0790542	-0.0834815	0.933469	0.999941
Cep97	1457.94	-0.0544641	0.118504	-0.459596	0.645806	0.993404
Cept1	2820.04	-0.0378425	0.0747086	-0.506535	0.612481	0.993404
Cercam	160.047	-0.253082	0.230949	-1.09583	0.273151	0.982515
Cerk	2086.14	-0.0115683	0.0579463	-0.199638	0.841764	0.999097
Cerkl	230.064	-0.261677	0.2637	-0.992327	0.321038	0.98345
Cers1	1609.22	-0.112073	0.0851663	-1.31593	0.188198	0.968628
Cers2	1413.72	-0.207491	0.0801566	-2.58857	0.00963742	0.476252
Cers4	2415.87	-0.0242105	0.0631614	-0.383312	0.701489	0.993404
Cers5	1998.06	-0.0066727	0.0783134	-0.0852052	0.932098	0.999941
Cers6	7216.68	0.0270858	0.110276	0.245618	0.805978	0.999097
Ces5a	41.7575	0.364763	0.32971	1.10631	0.26859	0.982515
Cetn2	1363.1	-0.0626968	0.111864	-0.560475	0.575156	0.993404
Cetn3	2784.95	-0.00574776	0.111725	-0.0514454	0.958971	0.999941
Cetn4	296.012	-0.185751	0.161626	-1.14926	0.250448	0.980357
Cfap100	282.071	0.0745218	0.338712	0.220015	0.825859	0.999097
Cfap20	1389.43	-0.105958	0.107025	-0.990038	0.322156	0.98345
Cfap206	68.126	-0.308634	0.371999	-0.829662	0.40673	0.991769
Cfap221	44.1751	-0.580521	0.398146	-1.45806	0.144824	0.943382
Cfap36	4273.74	0.00550428	0.0860991	0.0639297	0.949026	0.999941
Cfap43	115.207	-0.107962	0.245283	-0.440151	0.659828	0.993404
Cfap44	342.474	0.0211052	0.268429	0.0786247	0.937331	0.999941
Cfap45	190.276	-0.0916964	0.218582	-0.419505	0.674847	0.993404
Cfap46	204.771	-0.156669	0.229485	-0.682699	0.494797	0.993078
Cfap54	1065.26	-0.296515	0.256706	-1.15508	0.248058	0.980357
Cfap57	58.978	0.0751332	0.27238	0.27584	0.782671	0.999097
Cfap61	265.968	0.0880624	0.159173	0.55325	0.580092	0.993404
Cfap69	1319.29	-0.0418863	0.114935	-0.364434	0.715534	0.993404
Cfap70	96.4637	-0.437821	0.253766	-1.72529	0.0844749	0.896095
Cfap74	541.088	-0.217617	0.10201	-2.13328	0.0329016	0.714908
Cfap97	1614.51	-0.0292729	0.0939365	-0.311624	0.755326	0.994993
Cfap99	150.4	-0.0613384	0.306527	-0.200108	0.841396	0.999097
Cfdp1	2289.27	0.126754	0.073699	1.71989	0.085452	0.896095
Cfh	1638.17	-0.292478	0.401221	-0.72897	0.46602	0.993078
Cfl1	18565.3	-0.217295	0.115661	-1.87872	0.0602833	0.814748
Cfl2	2636.75	-0.121479	0.135446	-0.896881	0.369782	0.990874
Cflar	1384.24	0.0861111	0.191787	0.448993	0.653437	0.993404
Cfp	236.186	0.247091	0.174129	1.41901	0.155896	0.946822
Cftr	108.268	-0.0213094	0.381548	-0.0558497	0.955462	0.999941
Cggbp1	2797.54	0.0152121	0.181294	0.0839087	0.933129	0.999941
Cgn	177.114	0.100525	0.226641	0.443542	0.657373	0.993404
Cgnl1	776.488	0.0359006	0.0984494	0.36466	0.715365	0.993404
Cgref1	448.077	-0.0895546	0.20158	-0.444264	0.656852	0.993404
Cgrrf1	747.261	-0.207909	0.110461	-1.88219	0.0598108	0.814655
CH25-588N10.2	661.7	-0.00143876	0.109408	-0.0131505	0.989508	0.999941
Chac1	195.875	0.471322	0.197571	2.38558	0.0170522	0.578915
Chac2	426.221	0.148712	0.177226	0.839111	0.401407	0.990874
Chadl	250.177	0.0740612	0.150089	0.493448	0.621696	0.993404
Chaf1a	175.046	-0.191231	0.20582	-0.929116	0.352829	0.990874
Champ1	1349.8	-0.00169954	0.113898	-0.0149216	0.988095	0.999941
Chat	99.2169	0.46153	0.325333	1.41864	0.156005	0.946822
Chchd1	840.403	-0.199194	0.138923	-1.43385	0.151616	0.943624
Chchd10	1652.85	-0.0556072	0.0955707	-0.581844	0.560672	0.993078
Chchd3	5290.62	0.0352194	0.086772	0.405885	0.684827	0.993404
Chchd4	1137.78	0.0385547	0.118335	0.32581	0.744568	0.994993
Chchd5	227.77	-0.134883	0.165016	-0.817391	0.413705	0.991769
Chchd6	3483.25	0.0043155	0.185845	0.023221	0.981474	0.999941
Chchd7	813.247	0.0110762	0.101732	0.108877	0.9133	0.999728
Chd1	6539.01	0.0178503	0.0700566	0.254798	0.798879	0.999097
Chd1l	479.011	0.100405	0.102232	0.982125	0.326038	0.98345
Chd2	6458.73	0.0791735	0.0729923	1.08468	0.278062	0.982637
Chd3	28250.7	0.232678	0.102573	2.26841	0.023304	0.662819
Chd3os	3259.59	0.132367	0.128949	1.02651	0.304651	0.98345
Chd4	8211.28	0.0330911	0.0912895	0.362485	0.716989	0.993404
Chd5	8235.01	0.147312	0.0668211	2.20458	0.0274838	0.683669
Chd6	7571.52	0.0266098	0.0512477	0.51924	0.603593	0.993404
Chd7	1503.9	0.0499544	0.13481	0.370555	0.710969	0.993404
Chd8	5473.23	0.06539	0.0620033	1.05462	0.291598	0.98345
Chd9	11089.4	0.134248	0.0630172	2.13034	0.0331439	0.715349
Chdh	189.128	-0.17851	0.206419	-0.864797	0.38715	0.990874
Chek1	100.084	-0.22992	0.298054	-0.771405	0.440467	0.992754
Chek2	94.0639	-0.329587	0.431815	-0.76326	0.445308	0.992754
Cherp	965.233	-0.0365606	0.0938068	-0.389744	0.696726	0.993404
Chfr	1939.76	-0.0237313	0.0762381	-0.311278	0.755589	0.994993
Chga	6465.1	0.565356	0.613358	0.921739	0.356665	0.990874
Chgb	14416.8	0.251133	0.114012	2.20269	0.0276168	0.683669
Chic1	2977.93	0.0265383	0.102496	0.258919	0.795697	0.999097
Chic2	1398.6	-0.0453602	0.0757196	-0.599055	0.549136	0.993078
Chid1	2409.77	-0.0410076	0.0868163	-0.472349	0.636678	0.993404
Chil1	233.727	-0.833061	0.422112	-1.97356	0.0484322	0.789661
Chka	3105.74	0.0457788	0.0599897	0.763111	0.445397	0.992754
Chkb	464.832	-0.0872802	0.100812	-0.865774	0.386614	0.990874
Chl1	11273.5	-0.0671932	0.0972943	-0.690618	0.489805	0.993078
Chm	5228.33	-0.00538981	0.0802077	-0.0671981	0.946424	0.999941
Chmp1a	2482.45	-0.15252	0.0683924	-2.23007	0.0257425	0.678091
Chmp2a	2110.81	-0.0406729	0.0648568	-0.627119	0.530581	0.993078
Chmp2b	1915.75	-0.163792	0.0953192	-1.71835	0.0857327	0.896095
Chmp3	5000.53	0.0554595	0.0979855	0.565997	0.571396	0.993078
Chmp4b	4535.65	0.0760639	0.0791623	0.96086	0.336623	0.984399
Chmp5	3190.03	-0.111101	0.0795381	-1.39682	0.162466	0.952379
Chmp6	716.166	-0.0468659	0.0990681	-0.473068	0.636165	0.993404
Chmp7	2521.25	0.0156847	0.0575148	0.272707	0.785078	0.999097
Chn1	32995.8	-0.0627762	0.0946125	-0.663508	0.507005	0.993078
Chn2	2359.82	-0.0391529	0.118887	-0.329329	0.741907	0.994993
Chordc1	3581.55	0.194313	0.111985	1.73516	0.0827125	0.887374
Chp1	4639.24	-0.0961092	0.0492228	-1.95253	0.0508751	0.796847
Chpf	1406.61	0.0732106	0.105152	0.696234	0.486282	0.993078
Chpf2	2147.76	-0.00326342	0.08365	-0.0390127	0.96888	0.999941
Chpt1	3253.46	-0.0288033	0.0942478	-0.305613	0.7599	0.99513
Chrac1	385.317	0.122332	0.15735	0.777451	0.436893	0.992754
Chrd	975.417	0.00369727	0.389996	0.00948029	0.992436	0.999941
Chrdl1	846.9	-0.517538	0.254892	-2.03042	0.0423136	0.757444
Chrm1	3993.13	-0.197995	0.0945355	-2.0944	0.0362244	0.725566
Chrm2	2720.29	0.196569	0.115876	1.69637	0.089816	0.896095
Chrm3	8879.26	-0.0694045	0.224664	-0.308926	0.757378	0.994993
Chrm4	357.031	0.0733599	0.226631	0.323698	0.746167	0.994993
Chrna4	1114.65	0.139403	0.178971	0.778914	0.43603	0.992754
Chrna5	199.767	-0.0286879	0.295076	-0.097222	0.92255	0.999941
Chrna7	1579.31	0.0896906	0.184761	0.485442	0.627363	0.993404
Chrnb2	1672.05	-0.0740111	0.102125	-0.724711	0.468629	0.993078
Chst1	3766.02	-0.259322	0.0992467	-2.6129	0.00897773	0.456372
Chst10	1892.23	-0.0387835	0.101463	-0.382243	0.702281	0.993404
Chst11	3711.72	0.203674	0.14954	1.362	0.173197	0.96171
Chst12	315.783	-0.291898	0.16573	-1.76128	0.0781904	0.877091
Chst2	4977.35	-0.225815	0.194133	-1.16319	0.244751	0.980357
Chst3	153.547	0.0977081	0.216209	0.451915	0.65133	0.993404
Chst7	61.8959	-0.28781	0.432129	-0.666027	0.505394	0.993078
Chst8	390.703	-0.152765	0.129799	-1.17694	0.239219	0.980357
Chst9	351.664	0.0576406	0.299029	0.192759	0.847148	0.999164
Chsy1	1414.26	0.102707	0.0835696	1.229	0.21907	0.976807
Chsy3	12410.1	0.141736	0.171025	0.828749	0.407247	0.991769
Chtf8	1718.79	-0.0573059	0.110017	-0.520881	0.602449	0.993404
Chtop	5618.05	0.0737328	0.0942545	0.782274	0.434054	0.992754
Chuk	2730.37	0.0016633	0.0981523	0.0169461	0.98648	0.999941
Churc1	492.903	-0.252782	0.153298	-1.64896	0.0991568	0.896095
Ciao1	1677.67	-0.048672	0.108571	-0.448295	0.65394	0.993404
Ciapin1	1751.73	-0.0185235	0.0675714	-0.274133	0.783983	0.999097
Ciart	297.119	-0.31411	0.183641	-1.71046	0.0871809	0.896095
Cib1	268.125	-0.274807	0.244007	-1.12622	0.260071	0.980357
Cib2	433.527	-0.199394	0.199112	-1.00141	0.316626	0.98345
Cic	3013.29	-0.0419045	0.0883863	-0.474106	0.635424	0.993404
Cidea	70.9683	-0.0487264	0.342232	-0.142378	0.886781	0.999164
Cideb	64.8188	-0.118656	0.38256	-0.310162	0.756438	0.994993
Cinp	1584.56	0.0241048	0.152413	0.158155	0.874335	0.999164
Cipc	4057.57	0.00861324	0.137803	0.062504	0.950162	0.999941
Cir1	1086.4	-0.0174788	0.103117	-0.169504	0.8654	0.999164
Cirbp	2020.69	-0.42556	0.210045	-2.02604	0.0427604	0.762243
Cisd1	2631.14	0.139608	0.11262	1.23964	0.215108	0.973094
Cisd2	2110.22	0.0531872	0.0998817	0.532502	0.594378	0.993404
Cisd3	395.009	-0.241614	0.149398	-1.61724	0.105826	0.896896
Cish	107.303	0.0830001	0.235343	0.352677	0.72433	0.993404
Cit	4055.28	-0.00690488	0.0797451	-0.0865869	0.931	0.999941
Cited2	499.471	-0.0699861	0.163021	-0.429309	0.667698	0.993404
Cited4	68.1949	-0.529277	0.320415	-1.65185	0.0985657	0.896095
Ciz1	1026.66	0.0409071	0.0867953	0.471305	0.637423	0.993404
Ckap2	110.278	-1.7073	1.05843	-1.61305	0.106734	0.899283
Ckap4	448.863	0.0234758	0.119226	0.196902	0.843904	0.999164
Ckap5	11954.3	0.00215088	0.0602711	0.0356867	0.971532	0.999941
Ckb	31683.4	0.0754076	0.0715614	1.05375	0.291999	0.98345
Cklf	165.168	-0.00944232	0.215502	-0.0438155	0.965051	0.999941
Ckmt1	5740.32	-0.0243405	0.0968446	-0.251336	0.801555	0.999097
Cks1b	58.17	-0.256113	0.409535	-0.625375	0.531725	0.993078
Cks2	59.0386	-1.15046	0.491327	-2.34154	0.0192044	0.609182
Clasp1	7447.8	-0.0139684	0.0862693	-0.161917	0.871371	0.999164
Clasp2	20976.7	-0.0722584	0.0756115	-0.955653	0.339247	0.985055
Clasrp	1063.17	0.1211	0.0852961	1.41976	0.155678	0.946822
Clca3a1	89.2493	0.300971	0.578346	0.520399	0.602786	0.993404
Clcc1	1026.23	-0.0741094	0.0777851	-0.952745	0.340719	0.985481
Clcn1	324.518	0.172593	0.213847	0.807089	0.419615	0.992754
Clcn2	1185.15	-0.104773	0.128239	-0.817013	0.413921	0.991769
Clcn3	10714.2	-0.111438	0.0776945	-1.43432	0.151482	0.943624
[truncated: 10,800 more rows]
