# Supplementary material for: An essential role for MEF2C in the cortical response to loss of sleep in mice
Source: eLife journal article supplement (doi:10.7554/elife.58331), 2020-08-27
Supplement: supp [file elife-58331-supp-v1.zip › elife_poa_e58331_Supplementary_file_9.xlsx]

## Sheet: SLEEPSEQ_DEG_WT_ZT6_vs_WT_SD_DO
Downsampled (N=4 for CS & N=3 for SD)						Fig.1(B) (N=6 for CS & N=7 for SD)
ITERATION	GENES	DEG	DEG_UP	DEG_DN		WT	GENES	DEG	DEG_UP	DEG_DN
75	13047	875	269	606		1	12953	6248	3207	3041
8	13033	913	236	677
4	13016	1275	416	859
66	13023	1430	405	1025
78	13029	1609	503	1106
29	13061	1771	463	1308
53	13061	1771	463	1308
37	13057	1795	706	1089
79	13057	1795	706	1089
70	13060	1933	735	1198
39	13053	1992	620	1372
84	13042	2153	738	1415
45	13061	2186	781	1405
2	13093	2269	745	1524
92	13050	2441	836	1605
14	13050	2628	955	1673
49	13075	2711	953	1758
64	13075	2711	953	1758
98	13086	2747	1127	1620
55	13066	2788	1167	1621
16	13106	2874	969	1905
58	13106	2874	969	1905
17	13041	3008	1308	1700
9	13054	3040	1353	1687
41	13061	3169	1212	1957
54	13085	3187	1326	1861
50	13052	3220	1166	2054
10	13054	3259	1167	2092
13	13054	3259	1167	2092
56	13118	3283	1131	2152
48	13089	3338	1263	2075
32	13050	3479	1391	2088
6	13065	3560	1557	2003
15	13049	3572	1524	2048
69	13097	3629	1592	2037
23	13107	3639	1543	2096
26	13056	3772	1757	2015
20	13064	3963	1701	2262
99	13070	3965	1844	2121
3	13060	4103	1754	2349
22	13069	4125	1863	2262
83	13092	4143	1995	2148
21	13038	4277	1905	2372
31	13122	4311	1809	2502
76	13075	4329	2011	2318
95	13069	4361	2119	2242
87	13126	4424	1981	2443
68	13089	4431	1866	2565
40	13058	4486	1977	2509
100	13073	4488	2183	2305
28	13116	4694	2260	2434
65	13088	4694	1965	2729
90	13095	4811	2203	2608
11	13059	4884	2230	2654
33	13114	4947	2174	2773
43	13109	4950	2275	2675
80	13182	5005	2116	2889
67	13108	5007	2441	2566
89	13115	5049	2474	2575
24	13066	5059	2336	2723
61	13131	5091	2173	2918
71	13089	5141	2357	2784
34	13148	5143	2222	2921
7	13133	5159	2580	2579
27	13133	5159	2580	2579
82	13104	5271	2617	2654
96	13109	5280	2398	2882
51	13184	5331	2260	3071
72	13184	5331	2260	3071
19	13141	5430	2562	2868
46	13118	5444	2555	2889
52	13118	5444	2555	2889
81	13151	5444	2360	3084
35	13093	5496	2502	2994
97	13101	5500	2760	2740
1	13134	5647	2726	2921
94	13140	5761	2659	3102
85	13187	5772	2793	2979
30	13187	5805	2680	3125
59	13090	5861	2915	2946
86	13090	5861	2915	2946
73	13155	5890	2863	3027
88	13188	5982	2713	3269
62	13110	6139	2909	3230
12	13107	6145	2908	3237
38	13086	6167	3094	3073
60	13144	6177	2855	3322
25	13088	6350	3162	3188
93	13110	6353	3066	3287
91	13149	6432	3192	3240
5	13124	6519	3207	3312
42	13115	6567	3280	3287
74	13143	6723	3236	3487
77	13139	6749	3292	3457
18	13147	6768	3330	3438
47	13138	6859	3439	3420
44	13163	6913	3343	3570
36	13146	7133	3505	3628
63	13146	7133	3505	3628
57	13214	7742	3866	3876
