# Supplementary material for: An essential role for MEF2C in the cortical response to loss of sleep in mice
Source: eLife journal article supplement (doi:10.7554/elife.58331), 2020-08-27
Supplement: supp [file elife-58331-supp-v1.zip › elife_poa_e58331_Supplementary_file_10.xlsx]

## Sheet: OVERLAP
Overlap between DEGs for WT_CS|SD (6248 genes) and Mef2cff_CS|SD (767 genes)
Common genes (308 genes)
Abi3
Acsl3
Acsl4
Alas2
Aldh1a2
Aldob
Ankrd34c
Antxr1
Arap1
Arhgap10
Arhgef10l
Asb11
Asb2
Atp13a5
Atp8a2
Atp8b1
Atxn7l3b
B3galt2
Bace2
Bre
Brinp3
C1qc
C4b
Cacna1d
Cacna1h
Calr
Camk4
Capn6
Card10
Cars2
Cbln4
Ccdc30
Ccdc62
Ccdc85c
Ccnd1
Ccnd3
Ccng1
Cdh7
Cdk2ap2
Cdk5r1
Cecr6
Celsr1
Cers1
Cfap70
Cggbp1
Chtf8
Clasrp
Cldn11
Clec5a
Cmpk1
Cntfr
Col1a2
Cpne5
Cracr2a
Crispld1
Crybb1
Cx3cl1
Dgki
Dmpk
Dnajb5
Dusp4
Dvl2
Ebf1
Egr3
Egr4
Eml2
Enc1
Enpp6
Exosc2
Fam117a
Fam234a
Fam83d
Fbxo16
Fhit
Filip1
Fjx1
Fkbp5
Flrt3
Fmnl1
Fosb
Fosl2
Foxo4
Fras1
Frmd4a
Frmd4b
Gadd45a
Galnt14
Gfpt2
Gp1bb
Gpd1
Gpr17
Gpr22
Gpr27
Gpr3
Gpsm1
Grb10
Gstz1
Hapln1
Hax1
Hba-a1
Hba-a2
Hbb-bs
Hbb-bt
Hcrtr2
Hecw2
Hes1
Hexim1
Hist1h1b
Hmga1
Hr
Hspa5
Hspb8
Htr1b
Hunk
Ier5
Ifi27
Ifi35
Ifit1bl1
Igfbp6
Igip
Igsf21
Il33
Invs
Irs2
Jag2
Kcnip4
Kcnv1
Kdm7a
Klhdc7a
Krit1
Larp7
Ldlrad3
Lef1
Lmntd1
Lrrtm1
Lrrtm2
Ltbp3
Luzp1
Lyz2
Manf
Map2k5
Mboat1
Mecom
Met
Mid1
Midn
Mrpl32
Mrpl36
Msantd1
Mt1
Mtus2
Myo1d
Nagk
Nbeal2
Ndufaf6
Nectin1
Neto2
Neurod6
Ninj2
Nox1
Npas2
Npas3
Npsr1
Nptx1
Nr3c2
Nrarp
Nrg4
Nrgn
Nrn1
Obsl1
Olig1
Olig2
Oraov1
Osbpl7
Otub2
Pald1
Palm2
Palmd
Paqr8
Park2
Pcbp1
Pcdh20
Pcolce2
Pde8a
Pdia6
Pdik1l
Pdzrn4
Pgm2l1
Pigb
Pim2
Pim3
Pknox2
Plekha5
Plekhf1
Plp1
Plppr1
Pofut2
Pon2
Pou3f1
Pou3f2
Pou6f2
Ppp1r3g
Prr5l
Rab40c
Rai14
Ranbp17
Ranbp2
Rarg
Rasa4
Rasgef1c
Rasgrf1
Rassf3
Rbbp8
Rbks
Rfx1
Rgs17
Rims4
Rin1
Rmdn2
Rnf17
Rorb
Rps21
Rps27a
Rras2
Rtn2
Rundc1
Rxfp2
Satb1
Sbno2
Sdc4
Sdf2l1
Sec61b
Shb
Shisa9
Shtn1
Sik1
Skap1
Slc22a15
Slc38a6
Slc39a12
Slc6a13
Slc8a3
Smim3
Sox13
Sox8
Spred3
Spry4
Sptbn4
Stat5b
Stk33
Stra6
Stx3
Stx8
Sult1a1
Syt12
Taf7
Tbc1d24
Tcirg1
Tcte2
Thbs1
Thsd1
Timm50
Tle2
Tlr7
Tmem150a
Tmem198
Tmem56
Tnfaip8l1
Tnfrsf12a
Tpbg
Tprn
Trabd
Trappc6a
Trib2
Trnt1
Trp53
Trp53inp2
Tsc22d3
Tsc22d4
Tspan2
Ttn
Tunar
Uba52
Ubxn11
Uckl1
Ugt8a
Upp2
Usp36
Uvssa
Vat1
Vgf
Vwa3a
Wbscr17
Wnt2
Zbtb48
Zbtb7b
Zdbf2
Zfp28
Zfp316
Zfp354c
Zfp395
Zfp438
Zfp467
Zfp516
Zfp703
Zfp770
Zfp771
Zfp810

## Sheet: Gene Ontology
Category	ID	Name	Source	p-value	q-value FDR B&H	Hit Count in Query List	Hit Count in Genome	Hit in Query List
GO: Biological Process	GO:0007267	cell-cell signaling		3.733e-06	0.002204	53	1899	SYT12,TMEM198,TCIRG1,CCND1,FJX1,LRRTM1,RPS27A,SOX8,NRN1,TBC1D24,NRARP,MET,UBA52,CDK5R1,STX3,CACNA1H,HES1,NR3C2,DMPK,CX3CL1,PLP1,VGF,CACNA1D,ZNF703,NPTX1,HTR1B,RARG,GPR27,RASGRF1,NRGN,CAMK4,WNT2,DVL2,GRB10,SHISA9,SPTBN4,PIM3,RIN1,SLC8A3,CELSR1,MIDN,IGFBP6,NETO2,EGR3,TLE2,RIMS4,LRRTM2,DGKI,PRKN,IRS2,LEF1,HCRTR2,INVS
GO: Biological Process	GO:0022008	neurogenesis		4.978e-06	0.002612	52	1867	BRINP3,ATP8A2,TPRN,ATP8B1,SOX8,TUNAR,NRN1,TBC1D24,JAG2,TNFRSF12A,ACSL4,MET,CDK5R1,ALDH1A2,STX3,HECW2,NECTIN1,MANF,UGT8,HES1,FLRT3,BACE2,OLIG1,CX3CL1,PLP1,HSPA5,IL33,SDC4,NPTX1,GPR17,RASGRF1,CALR,WNT2,ENC1,DVL2,OBSL1,GRB10,POU3F1,POU3F2,SHTN1,CPNE5,TSPAN2,SPTBN4,SLC39A12,SLC8A3,CELSR1,PRKN,RORB,IRS2,OLIG2,LEF1,TP53
GO: Biological Process	GO:0051254	positive regulation of RNA metabolic process		2.752e-06	0.001857	52	1829	PRR5L,ZBTB48,NPAS3,MECOM,IER5,HMGA1,RPS27A,SOX8,TUNAR,ZNF467,TP53INP2,STAT5B,MSANTD1,MET,UBA52,CCDC62,FOXO4,HES1,HAX1,TAF7,CX3CL1,HSPA5,IL33,NPAS2,ZNF438,RARG,PIM2,CAMK4,WNT2,FOSB,FOSL2,DVL2,POU3F1,POU3F2,EBF1,ZBTB7B,SOX13,ARHGEF10L,SBNO2,EGR3,EGR4,SKAP1,ZNF516,H1-5,PRKN,RORB,KDM7A,PCBP1,NEUROD6,MAP2K5,LEF1,TP53
GO: Biological Process	GO:0045893	positive regulation of transcription, DNA-templated		2.802e-07	0.001323	51	1647	ZBTB48,NPAS3,MECOM,IER5,HMGA1,RPS27A,SOX8,TUNAR,ZNF467,TP53INP2,STAT5B,MSANTD1,MET,UBA52,CCDC62,FOXO4,HES1,HAX1,TAF7,CX3CL1,HSPA5,IL33,NPAS2,ZNF438,RARG,PIM2,CAMK4,WNT2,FOSB,FOSL2,DVL2,POU3F1,POU3F2,EBF1,ZBTB7B,SOX13,ARHGEF10L,SBNO2,EGR3,EGR4,SKAP1,ZNF516,H1-5,PRKN,RORB,KDM7A,PCBP1,NEUROD6,MAP2K5,LEF1,TP53
GO: Biological Process	GO:1902680	positive regulation of RNA biosynthetic process		1.379e-06	0.001326	51	1737	ZBTB48,NPAS3,MECOM,IER5,HMGA1,RPS27A,SOX8,TUNAR,ZNF467,TP53INP2,STAT5B,MSANTD1,MET,UBA52,CCDC62,FOXO4,HES1,HAX1,TAF7,CX3CL1,HSPA5,IL33,NPAS2,ZNF438,RARG,PIM2,CAMK4,WNT2,FOSB,FOSL2,DVL2,POU3F1,POU3F2,EBF1,ZBTB7B,SOX13,ARHGEF10L,SBNO2,EGR3,EGR4,SKAP1,ZNF516,H1-5,PRKN,RORB,KDM7A,PCBP1,NEUROD6,MAP2K5,LEF1,TP53
GO: Biological Process	GO:1903508	positive regulation of nucleic acid-templated transcription		1.355e-06	0.001326	51	1736	ZBTB48,NPAS3,MECOM,IER5,HMGA1,RPS27A,SOX8,TUNAR,ZNF467,TP53INP2,STAT5B,MSANTD1,MET,UBA52,CCDC62,FOXO4,HES1,HAX1,TAF7,CX3CL1,HSPA5,IL33,NPAS2,ZNF438,RARG,PIM2,CAMK4,WNT2,FOSB,FOSL2,DVL2,POU3F1,POU3F2,EBF1,ZBTB7B,SOX13,ARHGEF10L,SBNO2,EGR3,EGR4,SKAP1,ZNF516,H1-5,PRKN,RORB,KDM7A,PCBP1,NEUROD6,MAP2K5,LEF1,TP53
GO: Molecular Function	GO:0016772	transferase activity, transferring phosphorus-containing groups		0.0003363	0.02525	47	1859	CMPK1,SIK1,PGM2L1,CARD10,RBKS,CCND1,RPS27A,HUNK,TTN,GADD45A,SPRED3,CHTF8,MET,UBA52,CDK5R1,UCKL1,TAF7,DMPK,ALDOB,HSPB8,SDC4,GPD1,RANBP2,HTR1B,TRIB2,NAGK,PIM2,CAMK4,DUSP4,SHB,DVL2,HEXIM1,CCND3,CCNG1,PIM3,THBS1,MIDN,TRNT1,PDIK1L,STK33,SPRY4,DGKI,PRKN,IRS2,CERS1,MAP2K5,TP53
GO: Biological Process	GO:0048699	generation of neurons		3.949e-05	0.008109	47	1752	BRINP3,ATP8A2,TPRN,ATP8B1,SOX8,TUNAR,NRN1,TBC1D24,JAG2,TNFRSF12A,ACSL4,MET,CDK5R1,ALDH1A2,STX3,HECW2,NECTIN1,MANF,UGT8,HES1,FLRT3,OLIG1,CX3CL1,PLP1,HSPA5,SDC4,NPTX1,RASGRF1,CALR,WNT2,ENC1,DVL2,OBSL1,GRB10,POU3F2,SHTN1,CPNE5,TSPAN2,SPTBN4,SLC39A12,CELSR1,PRKN,RORB,IRS2,OLIG2,LEF1,TP53
GO: Biological Process	GO:0009890	negative regulation of biosynthetic process		0.000146	0.02299	46	1797	MECOM,SIK1,CCND1,ATP8B1,HMGA1,RPS27A,SOX8,NRARP,MET,UBA52,CDK5R1,SATB1,FOXO4,HES1,TSC22D4,DNAJB5,TAF7,BACE2,ZNF438,ZNF703,TRIB2,RARG,TSC22D3,CALR,RBBP8,FOSB,ENC1,GRB10,CGGBP1,ZBTB7B,IFI27,SOX13,HEXIM1,LARP7,SBNO2,CCND3,TLE2,H1-5,PRKN,RORB,CERS1,MAP2K5,OLIG2,LEF1,TP53,HR
GO: Biological Process	GO:0010558	negative regulation of macromolecule biosynthetic process		3.917e-05	0.008109	46	1700	MECOM,SIK1,CCND1,ATP8B1,HMGA1,RPS27A,SOX8,NRARP,MET,UBA52,CDK5R1,SATB1,FOXO4,HES1,TSC22D4,DNAJB5,TAF7,BACE2,ZNF438,ZNF703,TRIB2,RARG,TSC22D3,CALR,RBBP8,FOSB,ENC1,GRB10,CGGBP1,ZBTB7B,IFI27,SOX13,HEXIM1,LARP7,SBNO2,CCND3,TLE2,H1-5,PRKN,RORB,CERS1,MAP2K5,OLIG2,LEF1,TP53,HR
GO: Biological Process	GO:0031327	negative regulation of cellular biosynthetic process		9.117e-05	0.01656	46	1761	MECOM,SIK1,CCND1,ATP8B1,HMGA1,RPS27A,SOX8,NRARP,MET,UBA52,CDK5R1,SATB1,FOXO4,HES1,TSC22D4,DNAJB5,TAF7,BACE2,ZNF438,ZNF703,TRIB2,RARG,TSC22D3,CALR,RBBP8,FOSB,ENC1,GRB10,CGGBP1,ZBTB7B,IFI27,SOX13,HEXIM1,LARP7,SBNO2,CCND3,TLE2,H1-5,PRKN,RORB,CERS1,MAP2K5,OLIG2,LEF1,TP53,HR
GO: Cellular Component	GO:0000790	nuclear chromatin		0.000764	0.04278	45	1923	POU6F2,ZBTB48,NPAS3,MECOM,ZNF395,HMGA1,SOX8,ZNF467,ZNF354C,STAT5B,ZNF771,SATB1,ZNF770,FOXO4,HES1,NR3C2,TSC22D4,OLIG1,NPAS2,ZNF438,RARG,TSC22D3,FOSB,FOSL2,ENC1,ZFP28,POU3F1,POU3F2,EBF1,CGGBP1,ZBTB7B,RFX1,SOX13,PKNOX2,EGR3,EGR4,ZNF516,H1-5,PRKN,RORB,PCBP1,NEUROD6,OLIG2,LEF1,TP53
GO: Biological Process	GO:0009967	positive regulation of signal transduction		0.0003877	0.03981	45	1823	PRR5L,PDE8A,NRG4,TMEM198,NPSR1,CARD10,TLR7,RPS27A,GADD45A,SPRED3,TBC1D24,NRARP,JAG2,TNFRSF12A,MET,UBA52,MID1,RXFP2,HES1,NR3C2,HAX1,STRA6,CX3CL1,ARAP1,GPR3,GPR17,PIM2,GPR27,RASGRF1,CALR,PLEKHF1,SHB,DVL2,GRB10,ZBTB7B,HEXIM1,THBS1,NOX1,NETO2,SKAP1,DGKI,PRKN,IRS2,MAP2K5,TP53
GO: Molecular Function	GO:0016301	kinase activity		0.0001132	0.02155	44	1621	CMPK1,SIK1,PGM2L1,CARD10,RBKS,CCND1,RPS27A,HUNK,TTN,GADD45A,SPRED3,MET,UBA52,CDK5R1,UCKL1,TAF7,DMPK,ALDOB,HSPB8,SDC4,GPD1,RANBP2,HTR1B,TRIB2,NAGK,PIM2,CAMK4,DUSP4,SHB,DVL2,HEXIM1,CCND3,CCNG1,PIM3,THBS1,MIDN,PDIK1L,STK33,SPRY4,DGKI,PRKN,IRS2,MAP2K5,TP53
GO: Biological Process	GO:0030182	neuron differentiation		2.947e-05	0.00696	44	1579	BRINP3,ATP8A2,TPRN,ATP8B1,SOX8,TUNAR,NRN1,TBC1D24,JAG2,TNFRSF12A,ACSL4,MET,CDK5R1,ALDH1A2,STX3,HECW2,NECTIN1,MANF,UGT8,HES1,FLRT3,OLIG1,CX3CL1,PLP1,HSPA5,SDC4,NPTX1,RASGRF1,CALR,WNT2,ENC1,DVL2,OBSL1,GRB10,POU3F2,SHTN1,CPNE5,TSPAN2,SPTBN4,SLC39A12,PRKN,RORB,IRS2,OLIG2
GO: Biological Process	GO:2000113	negative regulation of cellular macromolecule biosynthetic process		4.345e-05	0.00855	44	1605	MECOM,SIK1,CCND1,ATP8B1,HMGA1,RPS27A,SOX8,NRARP,MET,UBA52,CDK5R1,SATB1,FOXO4,HES1,TSC22D4,DNAJB5,TAF7,BACE2,ZNF438,ZNF703,RARG,TSC22D3,CALR,FOSB,ENC1,GRB10,CGGBP1,ZBTB7B,IFI27,SOX13,HEXIM1,LARP7,SBNO2,CCND3,TLE2,H1-5,PRKN,RORB,CERS1,MAP2K5,OLIG2,LEF1,TP53,HR
GO: Molecular Function	GO:0000981	DNA-binding transcription factor activity, RNA polymerase II-specific		0.0002057	0.02428	43	1614	POU6F2,ZBTB48,NPAS3,MECOM,ZNF395,HMGA1,SOX8,ZNF467,ZNF354C,STAT5B,ZNF771,SATB1,ZNF770,FOXO4,HES1,NR3C2,TSC22D4,OLIG1,NPAS2,ZNF438,RARG,TSC22D3,FOSB,FOSL2,ZFP28,POU3F1,POU3F2,EBF1,CGGBP1,ZBTB7B,RFX1,SOX13,PKNOX2,EGR3,EGR4,ZNF516,PRKN,RORB,PCBP1,NEUROD6,OLIG2,LEF1,TP53
GO: Biological Process	GO:0045934	negative regulation of nucleobase-containing compound metabolic process		0.0001188	0.01968	42	1573	MECOM,SIK1,CCND1,ATP8B1,HMGA1,RPS27A,SOX8,NRARP,MET,UBA52,CDK5R1,SATB1,FOXO4,HES1,TSC22D4,DNAJB5,TAF7,ZNF438,ZNF703,RARG,TSC22D3,CALR,RBBP8,FOSB,CGGBP1,ZBTB7B,IFI27,SOX13,HEXIM1,LARP7,SBNO2,CCND3,TLE2,H1-5,PRKN,RORB,CERS1,MAP2K5,OLIG2,LEF1,TP53,HR
GO: Biological Process	GO:0045944	positive regulation of transcription by RNA polymerase II		1.684e-06	0.001326	42	1315	NPAS3,MECOM,IER5,HMGA1,RPS27A,SOX8,TUNAR,ZNF467,STAT5B,MET,UBA52,CCDC62,FOXO4,HES1,HAX1,TAF7,CX3CL1,HSPA5,IL33,NPAS2,ZNF438,RARG,WNT2,FOSB,FOSL2,POU3F1,POU3F2,EBF1,ZBTB7B,SOX13,ARHGEF10L,SBNO2,EGR3,EGR4,SKAP1,PRKN,RORB,PCBP1,NEUROD6,MAP2K5,LEF1,TP53
GO: Biological Process	GO:0051253	negative regulation of RNA metabolic process		5.328e-05	0.01006	41	1467	MECOM,SIK1,CCND1,ATP8B1,HMGA1,RPS27A,SOX8,NRARP,MET,UBA52,CDK5R1,SATB1,FOXO4,HES1,TSC22D4,DNAJB5,TAF7,ZNF438,ZNF703,RARG,TSC22D3,CALR,RBBP8,FOSB,CGGBP1,ZBTB7B,IFI27,SOX13,HEXIM1,LARP7,SBNO2,CCND3,TLE2,H1-5,PRKN,RORB,MAP2K5,OLIG2,LEF1,TP53,HR
GO: Biological Process	GO:1902679	negative regulation of RNA biosynthetic process		1.143e-05	0.004153	41	1372	MECOM,SIK1,CCND1,ATP8B1,HMGA1,RPS27A,SOX8,NRARP,MET,UBA52,CDK5R1,SATB1,FOXO4,HES1,TSC22D4,DNAJB5,TAF7,ZNF438,ZNF703,RARG,TSC22D3,CALR,RBBP8,FOSB,CGGBP1,ZBTB7B,IFI27,SOX13,HEXIM1,LARP7,SBNO2,CCND3,TLE2,H1-5,PRKN,RORB,MAP2K5,OLIG2,LEF1,TP53,HR
GO: Biological Process	GO:1903507	negative regulation of nucleic acid-templated transcription		1.104e-05	0.004153	41	1370	MECOM,SIK1,CCND1,ATP8B1,HMGA1,RPS27A,SOX8,NRARP,MET,UBA52,CDK5R1,SATB1,FOXO4,HES1,TSC22D4,DNAJB5,TAF7,ZNF438,ZNF703,RARG,TSC22D3,CALR,RBBP8,FOSB,CGGBP1,ZBTB7B,IFI27,SOX13,HEXIM1,LARP7,SBNO2,CCND3,TLE2,H1-5,PRKN,RORB,MAP2K5,OLIG2,LEF1,TP53,HR
GO: Biological Process	GO:0045892	negative regulation of transcription, DNA-templated		9.98e-06	0.004153	40	1316	MECOM,SIK1,CCND1,ATP8B1,HMGA1,RPS27A,SOX8,NRARP,MET,UBA52,CDK5R1,SATB1,FOXO4,HES1,TSC22D4,DNAJB5,TAF7,ZNF438,ZNF703,RARG,TSC22D3,CALR,FOSB,CGGBP1,ZBTB7B,IFI27,SOX13,HEXIM1,LARP7,SBNO2,CCND3,TLE2,H1-5,PRKN,RORB,MAP2K5,OLIG2,LEF1,TP53,HR
GO: Molecular Function	GO:0016773	phosphotransferase activity, alcohol group as acceptor		0.0003189	0.02525	39	1444	SIK1,PGM2L1,CARD10,RBKS,CCND1,RPS27A,HUNK,TTN,GADD45A,SPRED3,MET,UBA52,CDK5R1,TAF7,DMPK,ALDOB,HSPB8,SDC4,RANBP2,HTR1B,TRIB2,NAGK,PIM2,CAMK4,DUSP4,SHB,DVL2,HEXIM1,CCND3,CCNG1,PIM3,THBS1,MIDN,PDIK1L,STK33,SPRY4,DGKI,PRKN,MAP2K5
GO: Cellular Component	GO:0045202	synapse		0.0003754	0.0398	38	1482	FILIP1,SYT12,RPS21,LRRTM1,PALMD,NRN1,TBC1D24,MET,UBA52,CDK5R1,STX3,NECTIN1,C1QC,PLEKHA5,CACNA1H,C4B,NR3C2,FLRT3,DMPK,CX3CL1,VGF,CACNA1D,NPTX1,HTR1B,NRGN,CAMK4,HAPLN1,SHISA9,CBLN4,SLC8A3,CELSR1,NETO2,RIMS4,LRRTM2,DGKI,PRKN,RGS17,IGSF21
GO: Biological Process	GO:0048646	anatomical structure formation involved in morphogenesis		0.0002337	0.03329	37	1365	ATP8A2,TCIRG1,CARD10,FJX1,ATP8B1,SOX8,TTN,LUZP1,NRARP,TNFRSF12A,CDK5R1,ALDH1A2,NBEAL2,NECTIN1,UGT8,FOXO4,CACNA1H,HES1,STRA6,CX3CL1,POFUT2,SDC4,RARG,WNT2,SHB,DVL2,OBSL1,SBNO2,KRIT1,CCNG1,THBS1,CELSR1,NOX1,EGR3,MAP2K5,LEF1,TP53
GO: Biological Process	GO:0007417	central nervous system development		1.04e-05	0.004153	36	1129	POU6F2,MYO1D,MECOM,SOX8,TTN,ACSL3,MET,CDK5R1,ALDH1A2,UGT8,HES1,BACE2,OLIG1,PLP1,HSPA5,NPAS2,NPTX1,GPR17,NRGN,WNT2,CCDC85C,POU3F1,POU3F2,TSPAN2,HAPLN1,SPTBN4,SLC8A3,CELSR1,PRKN,IRS2,KDM7A,CERS1,NEUROD6,OLIG2,LEF1,TP53
GO: Cellular Component	GO:0030054	cell junction		0.0002669	0.0398	36	1352	SYT12,CCND1,HMGA1,LRRTM1,NRN1,FRMD4B,TBC1D24,STX3,NECTIN1,C4B,FLRT3,HSPA5,SDC4,RRAS2,NRGN,CALR,OBSL1,CCDC85C,KRIT1,SHISA9,SPTBN4,FRMD4A,CLDN11,CBLN4,SLC8A3,NOX1,TLE2,SKAP1,RIMS4,SPRY4,LRRTM2,PRKN,RGS17,RAI14,IGSF21,CDH7
GO: Molecular Function	GO:0043565	sequence-specific DNA binding		0.0001565	0.02155	35	1199	ZBTB48,MECOM,ZNF395,HMGA1,SOX8,ZNF467,GADD45A,STAT5B,SATB1,FOXO4,HES1,NR3C2,NPAS2,ZNF438,RARG,FOSB,FOSL2,POU3F1,POU3F2,EBF1,CGGBP1,ZBTB7B,RFX1,SOX13,PKNOX2,EGR3,EGR4,ZNF516,PRKN,RORB,PCBP1,NEUROD6,LEF1,TP53,HR
GO: Biological Process	GO:0048666	neuron development		0.0003834	0.03981	35	1298	ATP8A2,TPRN,ATP8B1,NRN1,TBC1D24,TNFRSF12A,ACSL4,MET,CDK5R1,STX3,HECW2,NECTIN1,MANF,UGT8,HES1,FLRT3,CX3CL1,PLP1,HSPA5,SDC4,NPTX1,RASGRF1,ENC1,DVL2,OBSL1,GRB10,POU3F2,SHTN1,CPNE5,TSPAN2,SPTBN4,SLC39A12,PRKN,RORB,IRS2
GO: Molecular Function	GO:0003690	double-stranded DNA binding		5.925e-05	0.02155	33	1048	ZBTB48,MECOM,ZNF395,HMGA1,SOX8,ZNF467,GADD45A,STAT5B,SATB1,HES1,NR3C2,NPAS2,RARG,RBBP8,FOSB,FOSL2,POU3F2,EBF1,CGGBP1,ZBTB7B,RFX1,SOX13,PKNOX2,EGR3,EGR4,ZNF516,H1-5,PRKN,RORB,NEUROD6,LEF1,TP53,HR
GO: Biological Process	GO:0031175	neuron projection development		0.0001904	0.029	33	1151	ATP8A2,TPRN,NRN1,TBC1D24,TNFRSF12A,ACSL4,MET,CDK5R1,STX3,HECW2,NECTIN1,MANF,UGT8,HES1,FLRT3,CX3CL1,PLP1,HSPA5,SDC4,NPTX1,RASGRF1,ENC1,DVL2,OBSL1,GRB10,POU3F2,SHTN1,CPNE5,TSPAN2,SPTBN4,SLC39A12,PRKN,IRS2
GO: Molecular Function	GO:0001067	regulatory region nucleic acid binding		0.0002478	0.02525	31	1036	ZBTB48,MECOM,ZNF395,HMGA1,SOX8,ZNF467,GADD45A,STAT5B,SATB1,HES1,TAF7,NPAS2,RARG,FOSB,FOSL2,POU3F2,EBF1,CGGBP1,ZBTB7B,RFX1,SOX13,PKNOX2,EGR3,EGR4,ZNF516,PRKN,RORB,NEUROD6,LEF1,TP53,HR
GO: Biological Process	GO:0051338	regulation of transferase activity		0.0003392	0.03746	31	1089	CARD10,CCND1,RPS27A,PPP1R3G,TTN,GADD45A,SPRED3,CHTF8,MET,UBA52,CDK5R1,TAF7,SDC4,RANBP2,HTR1B,TRIB2,DUSP4,SHB,DVL2,HEXIM1,CCND3,CCNG1,THBS1,MIDN,SPRY4,DGKI,PRKN,IRS2,CERS1,MAP2K5,TP53
GO: Biological Process	GO:0099536	synaptic signaling		1.346e-05	0.004542	31	913	SYT12,LRRTM1,NRN1,TBC1D24,MET,CDK5R1,STX3,CACNA1H,NR3C2,DMPK,CX3CL1,PLP1,VGF,CACNA1D,NPTX1,HTR1B,RASGRF1,NRGN,CAMK4,SHISA9,SPTBN4,RIN1,SLC8A3,CELSR1,NETO2,EGR3,RIMS4,LRRTM2,DGKI,PRKN,HCRTR2
GO: Biological Process	GO:1902533	positive regulation of intracellular signal transduction		0.0005362	0.04778	31	1119	PRR5L,PDE8A,NRG4,NPSR1,CARD10,TLR7,RPS27A,GADD45A,SPRED3,MET,UBA52,MID1,RXFP2,NR3C2,HAX1,CX3CL1,GPR3,GPR17,PIM2,RASGRF1,CALR,PLEKHF1,DVL2,HEXIM1,THBS1,NOX1,DGKI,PRKN,IRS2,MAP2K5,TP53
GO: Biological Process	GO:0007268	chemical synaptic transmission		2.189e-05	0.006081	30	891	SYT12,LRRTM1,NRN1,TBC1D24,MET,STX3,CACNA1H,NR3C2,DMPK,CX3CL1,PLP1,VGF,CACNA1D,NPTX1,HTR1B,RASGRF1,NRGN,CAMK4,SHISA9,SPTBN4,RIN1,SLC8A3,CELSR1,NETO2,EGR3,RIMS4,LRRTM2,DGKI,PRKN,HCRTR2
GO: Biological Process	GO:0098916	anterograde trans-synaptic signaling		2.189e-05	0.006081	30	891	SYT12,LRRTM1,NRN1,TBC1D24,MET,STX3,CACNA1H,NR3C2,DMPK,CX3CL1,PLP1,VGF,CACNA1D,NPTX1,HTR1B,RASGRF1,NRGN,CAMK4,SHISA9,SPTBN4,RIN1,SLC8A3,CELSR1,NETO2,EGR3,RIMS4,LRRTM2,DGKI,PRKN,HCRTR2
GO: Biological Process	GO:0099537	trans-synaptic signaling		2.641e-05	0.006565	30	900	SYT12,LRRTM1,NRN1,TBC1D24,MET,STX3,CACNA1H,NR3C2,DMPK,CX3CL1,PLP1,VGF,CACNA1D,NPTX1,HTR1B,RASGRF1,NRGN,CAMK4,SHISA9,SPTBN4,RIN1,SLC8A3,CELSR1,NETO2,EGR3,RIMS4,LRRTM2,DGKI,PRKN,HCRTR2
GO: Molecular Function	GO:0000976	transcription regulatory region sequence-specific DNA binding		0.0001103	0.02155	29	898	MECOM,ZNF395,HMGA1,SOX8,ZNF467,GADD45A,STAT5B,SATB1,HES1,NPAS2,RARG,FOSB,FOSL2,POU3F2,EBF1,CGGBP1,ZBTB7B,RFX1,SOX13,PKNOX2,EGR3,EGR4,ZNF516,PRKN,RORB,NEUROD6,LEF1,TP53,HR
GO: Molecular Function	GO:1990837	sequence-specific double-stranded DNA binding		0.0002751	0.02525	29	948	MECOM,ZNF395,HMGA1,SOX8,ZNF467,GADD45A,STAT5B,SATB1,HES1,NPAS2,RARG,FOSB,FOSL2,POU3F2,EBF1,CGGBP1,ZBTB7B,RFX1,SOX13,PKNOX2,EGR3,EGR4,ZNF516,PRKN,RORB,NEUROD6,LEF1,TP53,HR
GO: Biological Process	GO:0060322	head development		0.0001208	0.01968	28	885	MYO1D,MECOM,TTN,ACSL3,MET,CDK5R1,ALDH1A2,HES1,FLRT3,STRA6,PLP1,CRISPLD1,HSPA5,RARG,NRGN,WNT2,CCDC85C,POU3F1,POU3F2,TSPAN2,SLC8A3,IRS2,KDM7A,CERS1,NEUROD6,OLIG2,LEF1,TP53
GO: Cellular Component	GO:0098794	postsynapse		0.0001618	0.0398	26	825	FILIP1,SYT12,LRRTM1,PALMD,TBC1D24,MET,CDK5R1,STX3,NECTIN1,C1QC,PLEKHA5,CACNA1H,NR3C2,FLRT3,DMPK,CX3CL1,NPTX1,NRGN,CAMK4,SHISA9,SLC8A3,NETO2,LRRTM2,DGKI,PRKN,IGSF21
GO: Biological Process	GO:0050804	modulation of chemical synaptic transmission		1.59e-06	0.001326	24	539	SYT12,LRRTM1,NRN1,TBC1D24,MET,STX3,NR3C2,DMPK,CX3CL1,VGF,CACNA1D,NPTX1,HTR1B,RASGRF1,NRGN,SHISA9,RIN1,SLC8A3,CELSR1,NETO2,RIMS4,LRRTM2,DGKI,PRKN
GO: Biological Process	GO:0099177	regulation of trans-synaptic signaling		1.643e-06	0.001326	24	540	SYT12,LRRTM1,NRN1,TBC1D24,MET,STX3,NR3C2,DMPK,CX3CL1,VGF,CACNA1D,NPTX1,HTR1B,RASGRF1,NRGN,SHISA9,RIN1,SLC8A3,CELSR1,NETO2,RIMS4,LRRTM2,DGKI,PRKN
GO: Biological Process	GO:1905114	cell surface receptor signaling pathway involved in cell-cell signaling		0.0002307	0.03329	24	734	TMEM198,CCND1,RPS27A,TBC1D24,NRARP,MET,UBA52,DMPK,CX3CL1,ZNF703,NPTX1,RARG,WNT2,DVL2,GRB10,SHISA9,CELSR1,IGFBP6,NETO2,TLE2,DGKI,PRKN,LEF1,INVS
GO: Biological Process	GO:0042063	gliogenesis		0.0002397	0.03329	15	352	SOX8,CDK5R1,HES1,BACE2,OLIG1,CX3CL1,PLP1,IL33,GPR17,POU3F1,POU3F2,TSPAN2,SLC8A3,OLIG2,LEF1
GO: Biological Process	GO:0045927	positive regulation of growth		0.0004141	0.04161	14	331	ATP8A2,STAT5B,TNFRSF12A,ACSL4,WNT2,POU3F2,SHTN1,CPNE5,EXOSC2,SPTBN4,H1-5,PRKN,MAP2K5,LEF1
GO: Biological Process	GO:0048167	regulation of synaptic plasticity		3.332e-05	0.007493	13	227	SYT12,LRRTM1,STX3,CX3CL1,VGF,RASGRF1,NRGN,SHISA9,RIN1,SLC8A3,RIMS4,LRRTM2,DGKI
GO: Biological Process	GO:0010001	glial cell differentiation		0.0005095	0.04627	12	261	SOX8,HES1,BACE2,OLIG1,PLP1,GPR17,POU3F1,POU3F2,TSPAN2,SLC8A3,OLIG2,LEF1
GO: Biological Process	GO:0007272	ensheathment of neurons		0.0004663	0.04396	9	154	UGT8,PLP1,RARG,POU3F1,POU3F2,TSPAN2,CLDN11,SLC8A3,OLIG2
GO: Biological Process	GO:0008366	axon ensheathment		0.0004663	0.04396	9	154	UGT8,PLP1,RARG,POU3F1,POU3F2,TSPAN2,CLDN11,SLC8A3,OLIG2
GO: Molecular Function	GO:0042826	histone deacetylase binding		0.0001485	0.02155	9	128	SIK1,CCND1,HES1,ZBTB7B,H1-5,PRKN,LEF1,TP53,HR
GO: Biological Process	GO:0046928	regulation of neurotransmitter secretion		0.0002995	0.03746	9	145	SYT12,NRN1,NR3C2,CACNA1D,HTR1B,CELSR1,RIMS4,DGKI,PRKN
GO: Biological Process	GO:0048709	oligodendrocyte differentiation		0.0002663	0.03494	8	113	SOX8,HES1,OLIG1,PLP1,GPR17,TSPAN2,SLC8A3,OLIG2
GO: Cellular Component	GO:0016528	sarcoplasm		0.0002983	0.0398	7	89	RTN2,MANF,HAX1,DMPK,CALR,THBS1,SLC8A3
GO: Molecular Function	GO:0019200	carbohydrate kinase activity		1.461e-05	0.01207	7	53	PGM2L1,RBKS,ALDOB,RANBP2,NAGK,MIDN,PRKN
GO: Biological Process	GO:0046835	carbohydrate phosphorylation		2.442e-05	0.006408	7	59	PGM2L1,RBKS,ALDOB,RANBP2,NAGK,MIDN,PRKN
GO: Cellular Component	GO:0048786	presynaptic active zone		0.0004738	0.0398	7	96	STX3,NECTIN1,CACNA1H,NR3C2,CACNA1D,RIMS4,DGKI
GO: Cellular Component	GO:0016529	sarcoplasmic reticulum		0.0009696	0.04887	6	79	RTN2,MANF,HAX1,DMPK,CALR,THBS1
GO: Cellular Component	GO:0005790	smooth endoplasmic reticulum		0.0004535	0.0398	5	45	MYO1D,ALDOB,HSPA5,CALR,PDIA6
GO: Cellular Component	GO:0048787	presynaptic active zone membrane		0.0005562	0.04005	5	47	STX3,NECTIN1,CACNA1H,CACNA1D,DGKI
Disease	C0042076	Urologic Neoplasms	DisGeNET Curated	2.751e-06	0.007501	4	8	CCND1,SULT1A1,FHIT,TP53
Disease	C0751571	Cancer of Urinary Tract	DisGeNET Curated	2.751e-06	0.007501	4	8	CCND1,SULT1A1,FHIT,TP53
GO: Biological Process	GO:0042492	gamma-delta T cell differentiation		2.059e-05	0.006081	4	12	STAT5B,JAG2,SOX13,EGR3
GO: Biological Process	GO:0046629	gamma-delta T cell activation		0.0001187	0.01968	4	18	STAT5B,JAG2,SOX13,EGR3
GO: Biological Process	GO:0006222	UMP biosynthetic process		0.000349	0.03746	3	10	CMPK1,UCKL1,UPP2
GO: Biological Process	GO:0009173	pyrimidine ribonucleoside monophosphate metabolic process		0.000349	0.03746	3	10	CMPK1,UCKL1,UPP2
GO: Biological Process	GO:0009174	pyrimidine ribonucleoside monophosphate biosynthetic process		0.000349	0.03746	3	10	CMPK1,UCKL1,UPP2
GO: Biological Process	GO:0033131	regulation of glucokinase activity		0.000349	0.03746	3	10	RANBP2,MIDN,PRKN
GO: Cellular Component	GO:0034663	endoplasmic reticulum chaperone complex		0.0007565	0.04278	3	13	SDF2L1,HSPA5,PDIA6
GO: Biological Process	GO:0045586	regulation of gamma-delta T cell differentiation		0.000247	0.03333	3	9	STAT5B,SOX13,EGR3
GO: Biological Process	GO:0046049	UMP metabolic process		0.000349	0.03746	3	10	CMPK1,UCKL1,UPP2
GO: Biological Process	GO:0046643	regulation of gamma-delta T cell activation		0.0004746	0.04396	3	11	STAT5B,SOX13,EGR3
GO: Biological Process	GO:1903299	regulation of hexokinase activity		0.0004746	0.04396	3	11	RANBP2,MIDN,PRKN
GO: Biological Process	GO:2000192	negative regulation of fatty acid transport		0.000349	0.03746	3	10	ACSL4,THBS1,IRS2
