# Supplementary figures and images for: An essential role for MEF2C in the cortical response to loss of sleep in mice
Source: eLife journal article supplement (doi:10.7554/elife.58331), 2020-08-27

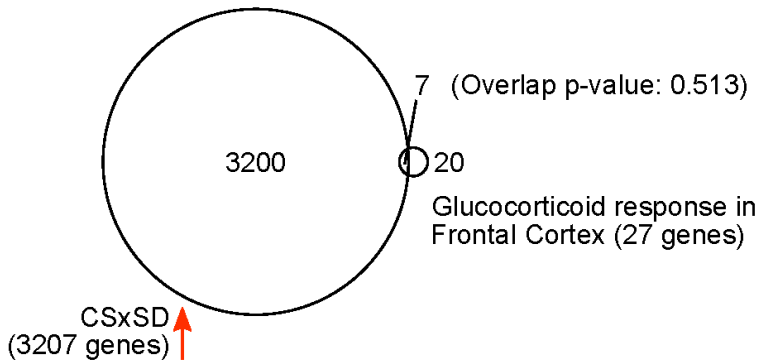

Supplement: supp [file elife-58331-supp-v1.zip › elife_poa_e58331_Figure_1_figure_supplement_1.pdf]

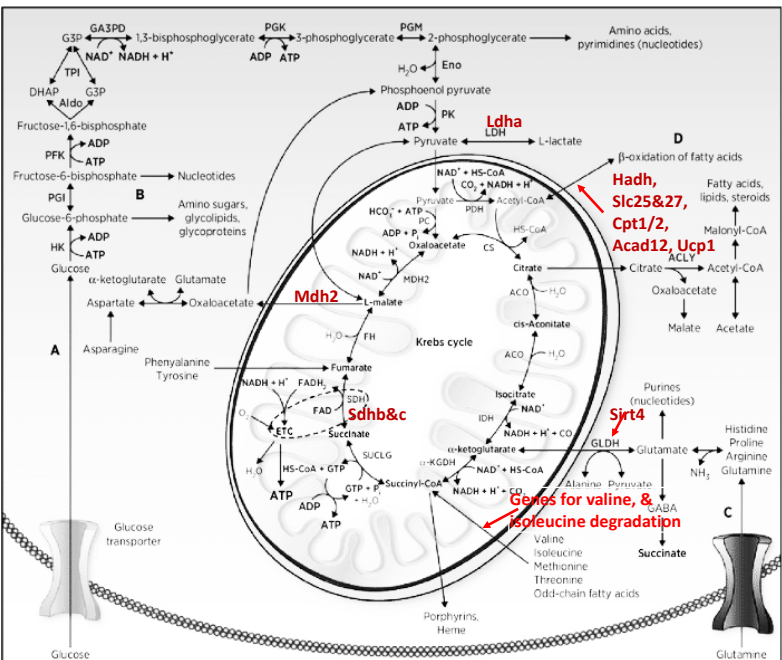

Supplement: supp [file elife-58331-supp-v1.zip › elife_poa_e58331_Figure_1_figure_supplement_2.pdf]

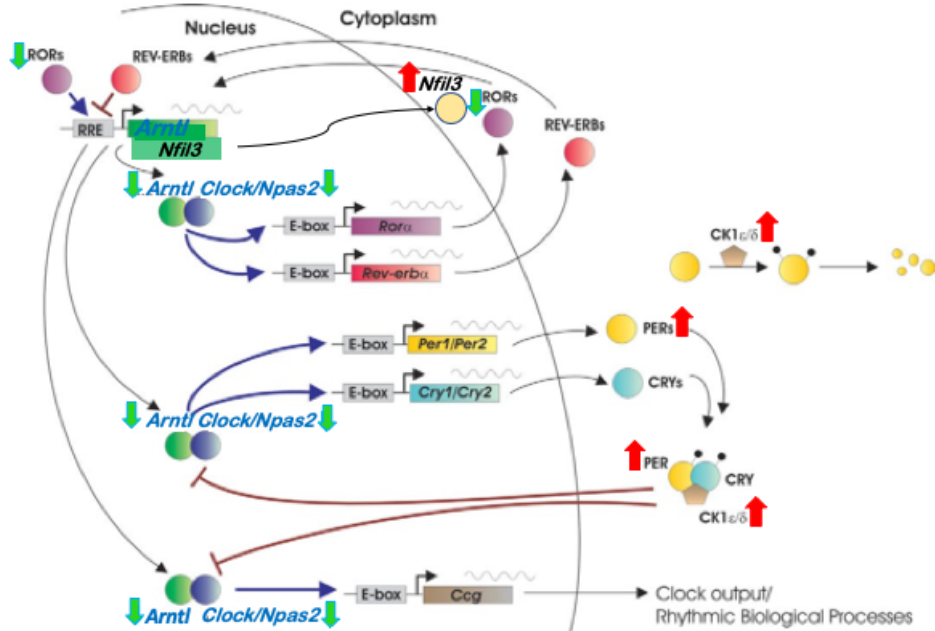

Supplement: supp [file elife-58331-supp-v1.zip › elife_poa_e58331_Figure_1_figure_supplement_3.pdf]

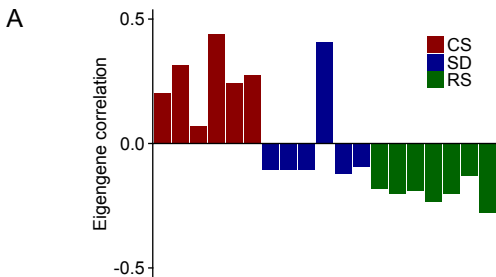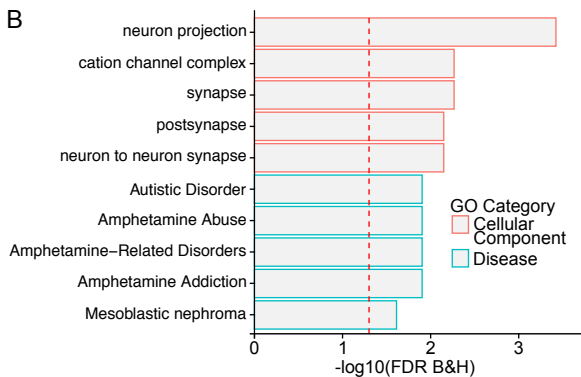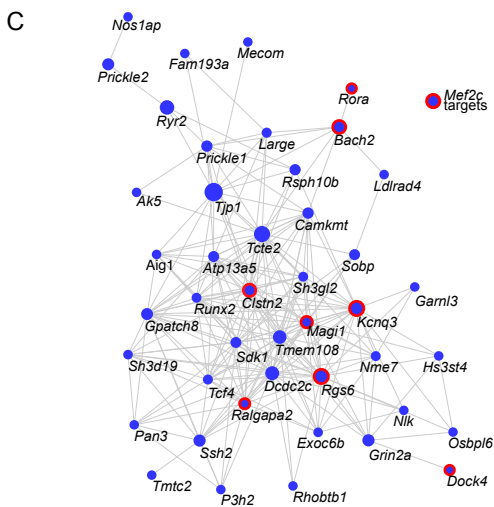

Supplement: supp [file elife-58331-supp-v1.zip › elife_poa_e58331_Figure_2_figure_supplement_1.pdf]

WT

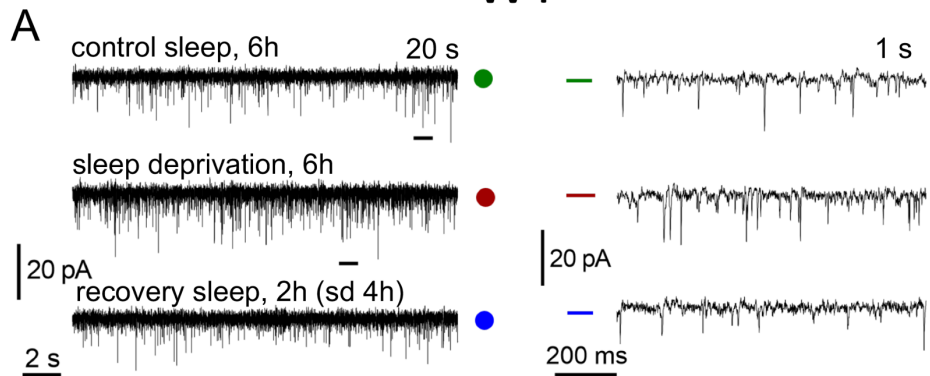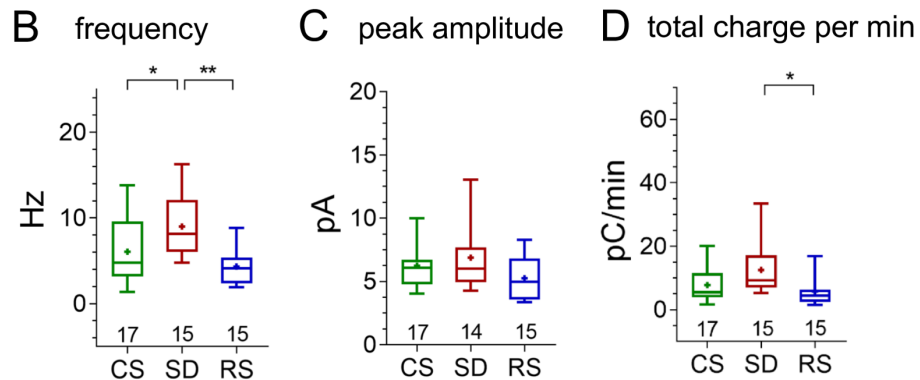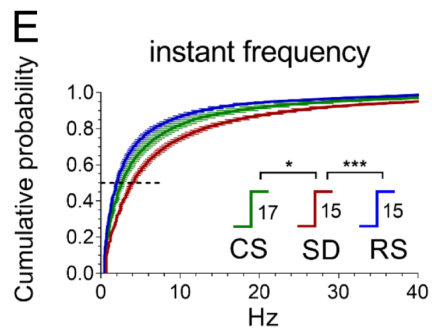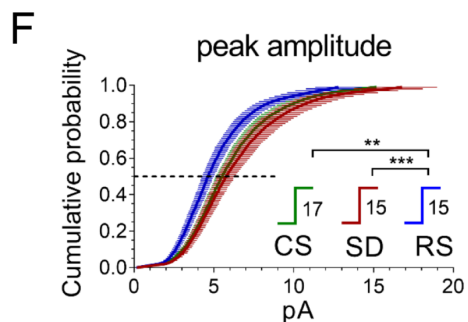*Mef2c*<sup>f/f</sup>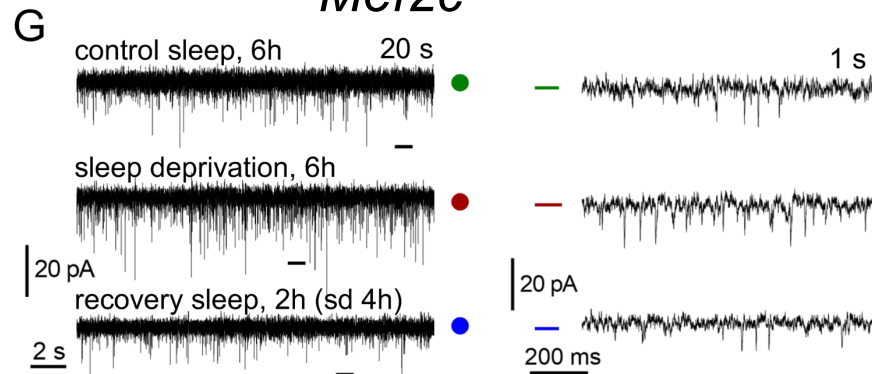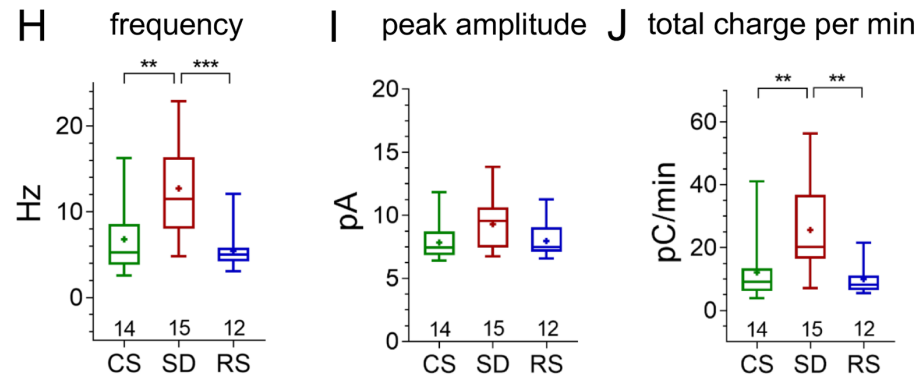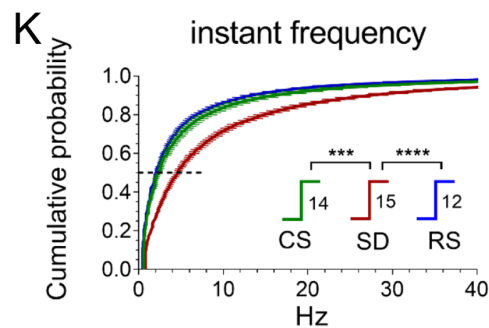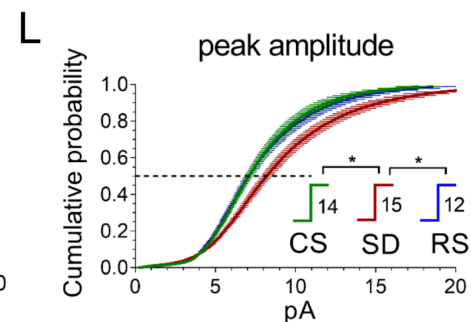

Supplement: supp [file elife-58331-supp-v1.zip › elife_poa_e58331_Figure_4_figure_supplement_1.pdf]

**A.** cumulative distribution of SWS episodes

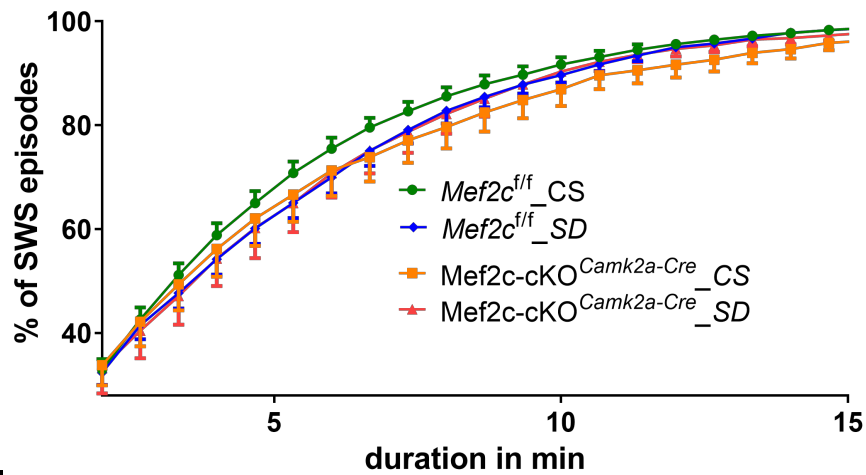

**B.**

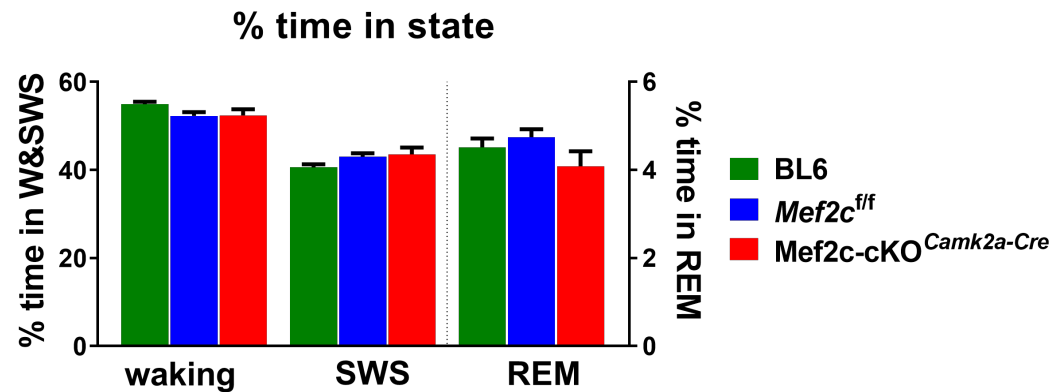

**C.**

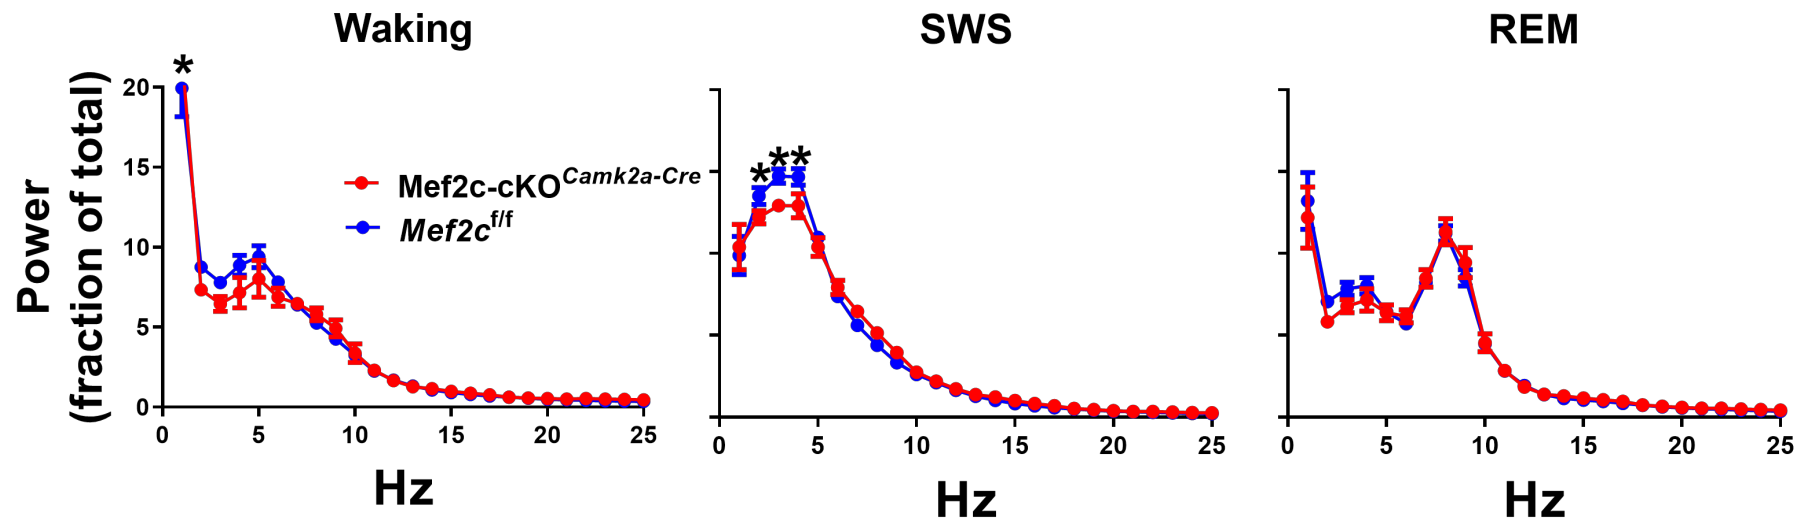

Supplement: supp [file elife-58331-supp-v1.zip › elife_poa_e58331_Figure_6_figure_supplement_1.pdf]

# A. cumulative distribution of SWS episodes

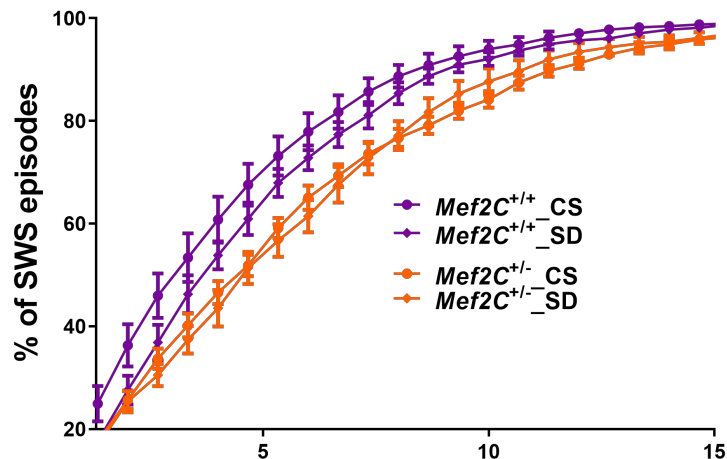

# B. % time in state

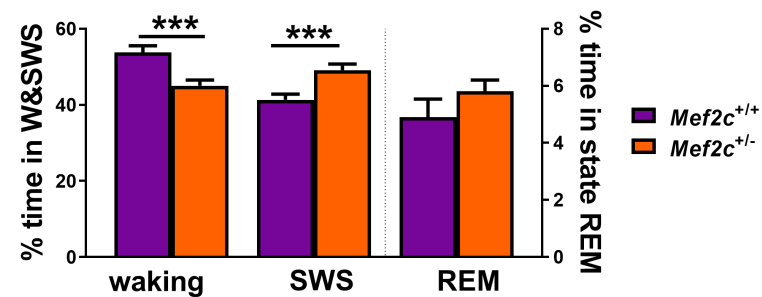

# C. SWS Episode (min)

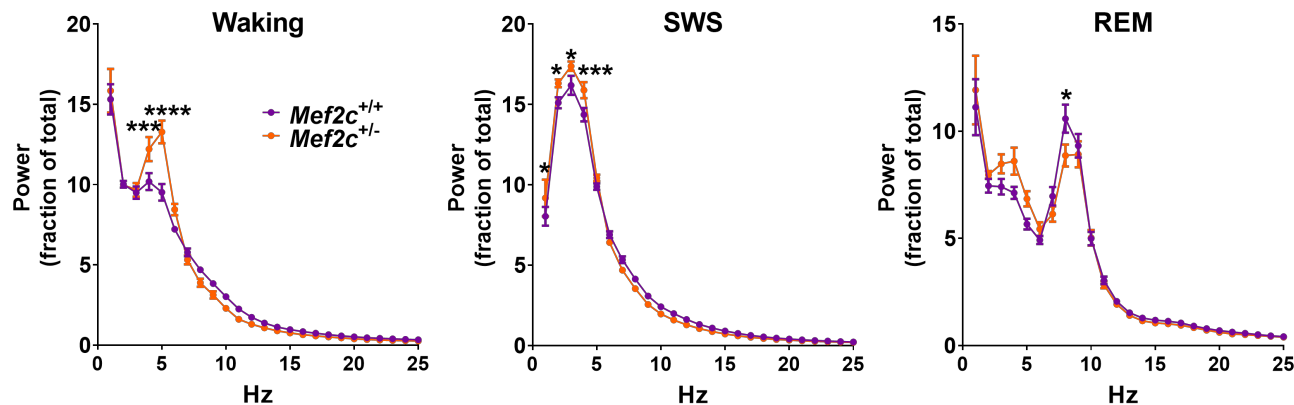

Supplement: supp [file elife-58331-supp-v1.zip › elife_poa_e58331_Figure_7_figure_supplement_1.pdf]

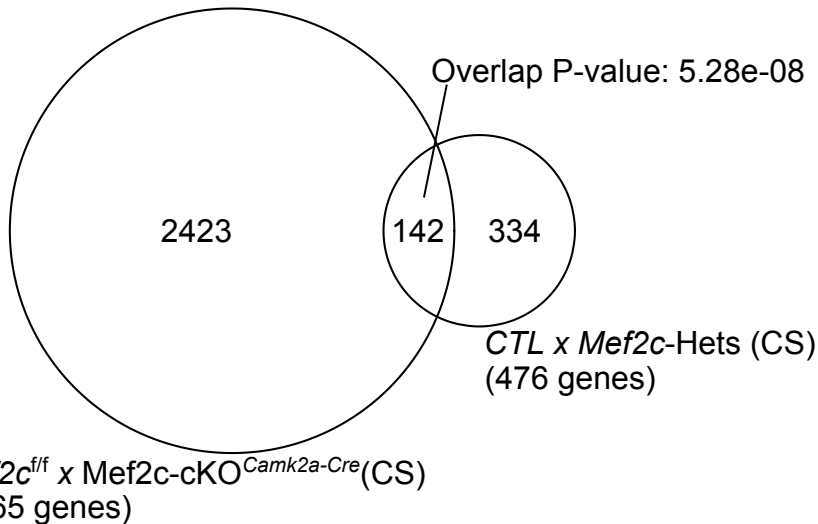

Supplement: supp [file elife-58331-supp-v1.zip › elife_poa_e58331_Figure_7_figure_supplement_2.pdf]
